# Supplementary material for: Homologue replacement in the import motor of the mitochondrial inner membrane of trypanosomes
Source: eLife. 2020 Feb 27;9:e52560. doi: 10.7554/eLife.52560 (PMC7064343; doi:10.7554/eLife.52560)
Supplement: Figure 1—source data 1. [file elife-52560-fig1-data1.xlsx]

## Sheet: Sheet1
Species	Group	Subgroup	Source	Data type
Symbiodinium microadriaticum	Alveolata	Dinoflagellata	NCBI	Genome
Tetrahymena thermophila SB210	Alveolata	Ciliata	NCBI	Genome
Toxoplasma gondii RH	Alveolata	Apicomplexa	EuPathDB	Genome
Vitrella brassicaformis CCMP3155	Alveolata	Apicomplexa	NCBI	Genome
Acanthamoeba castellanii Neff	Amoebozoa	Amoebozoa	NCBI	Genome
Dictyostelium discoideum AX4	Amoebozoa	Amoebozoa	NCBI	Genome
Guillardia theta CCMP2712	Cryptophyta	Cryptophyta	NCBI	Genome
Naegleria gruberi	Excavata	Percolozoa	NCBI	Genome
Spironucleus salmonicida	Excavata	Metamonada	NCBI	Genome
Trichomonas vaginalis G3	Excavata	Metamonada	NCBI	Genome
Emiliania huxleyi CCMP1516	Haptophyta	Haptophyta	NCBI	Genome
Blastocystis hominis	Heterokonta	Opalinata	NCBI	Genome
Ectocarpus siliculosus	Heterokonta	Ochrophyta	NCBI	Genome
Phytophthora infestans T30-4	Heterokonta	Pseudofungi	NCBI	Genome
Thalassiosira pseudonana CCMP1335	Heterokonta	Ochrophyta	NCBI	Genome
Caenorhabditis elegans	Opisthokonta	Metazoa	NCBI	Genome
Capsaspora owczarzaki ATCC30864	Opisthokonta	Filasterea	NCBI	Genome
Homo sapiens	Opisthokonta	Metazoa	NCBI	Genome
Monosiga brevicollis MX1	Opisthokonta	Choanoflagellata	NCBI	Genome
Rozella allomycis CSF55	Opisthokonta	Fungi	NCBI	Genome
Saccharomyces cerevisiae S288C	Opisthokonta	Fungi	NCBI	Genome
Schizosaccharomyces pombe	Opisthokonta	Fungi	NCBI	Genome
Sphaeroforma arctica JP610	Opisthokonta	Ichthyosporea	NCBI	Genome
Ustilago maydis 521	Opisthokonta	Fungi	NCBI	Genome
Arabidopsis thaliana	Plantae	Embryophyta	NCBI	Genome
Chlamydomonas reinhardtii	Plantae	Chlorophyta	NCBI	Genome
Cyanophora paradoxa	Plantae	Glaucophyta	http://cyanophora.rutgers.edu/cyanophora/	Genome
Porphyra umbilicalis	Plantae	Rhodophyta	NCBI	Genome
Bigelowiella natans CCMP2755	Rhizaria	Cercozoa	NCBI	Genome
Blechomonas ayalai B08-376	Excavata	Kinetoplastea	EuPathDB	Genome
Bodo saltans strain Lake Konstanz	Excavata	Kinetoplastea	EuPathDB	Genome
Crithidia fasciculata strain Cf-Cl	Excavata	Kinetoplastea	EuPathDB	Genome
Diplonema ambulator	Excavata	Diplonemea	NCBI	Transcriptome
Diplonema sp.	Excavata	Diplonemea	NCBI	Transcriptome
Endotrypanum monterogeii strain LV88	Excavata	Kinetoplastea	EuPathDB	Genome
Euglena gracilis	Excavata	Euglenida	NCBI	Genome
Eutreptiella gymnastica NIES381	Excavata	Euglenida	MMETSP	Transcriptome
Eutreptiella sp. CCMP1594	Excavata	Euglenida	MMETSP	Transcriptome
Leishmania major strain Friedlin	Excavata	Kinetoplastea	EuPathDB	Genome
Leptomonas seymouri ATCC 30220	Excavata	Kinetoplastea	EuPathDB	Genome
Neobodo designis	Excavata	Kinetoplastea	EuPathDB	Genome
Paratrypanosoma confusum CUL13	Excavata	Kinetoplastea	EuPathDB	Genome
Perkinsela sp. CCAP15604	Excavata	Kinetoplastea	NCBI	Genome
Rhynchopus euleeides	Excavata	Diplonemea	NCBI	Transcriptome
Trypanoplasma borreli	Excavata	Kinetoplastea	EuPathDB	Genome
Trypanosoma brucei brucei TREU927	Excavata	Kinetoplastea	EuPathDB	Genome
