# Supplementary material for: Homologue replacement in the import motor of the mitochondrial inner membrane of trypanosomes
Source: eLife. 2020 Feb 27;9:e52560. doi: 10.7554/eLife.52560 (PMC7064343; doi:10.7554/eLife.52560)
Supplement: Figure 3—source data 1. [file elife-52560-fig3-data1.xlsx]

## Sheet: ACAD-myc SILAC IPs
	Figure 3 - Source Data 1: List of proteins identified in SILAC-AP-MS experiments of ACAD-myc complexes
													Data determined across Replicates 1 - 3							Replicate 1							Replicate 2							Replicate 3
	Protein Group ID	Protein IDs	Majority Protein IDs	Gene Name	Protein Description	Mol. Weight [kDa]	Sequence Coverage [%]	Q-Value	Score	# of Proteins in Protein Group	Mitochondrial Proteome (acc. to Peikert et al., 2017)	Enrichment Factor	Mean log10 ACAD-myc/Ctrl	p-Value	-log10 p-Value	p-Value < 0.05	Sequence Coverage [%]	Peptides	Unique Peptides	Ratio ACAD-myc/Ctrl	log10 Ratio ACAD-myc/Ctrl	Ratio Variability [%]	SILAC Peptide Pairs	Sequence Coverage [%]	Peptides	Unique Peptides	Ratio ACAD-myc/Ctrl	log10 Ratio ACAD-myc/Ctrl	Ratio Variability [%]	SILAC Peptide Pairs	Sequence Coverage [%]	Peptides	Unique Peptides	Ratio ACAD-myc/Ctrl	log10 Ratio ACAD-myc/Ctrl	Ratio Variability [%]	SILAC Peptide Pairs
	770	Tb927.11.13290	Tb927.11.13290	TbTim17	mitochondrial import inner membrane translocase subunit tim17 (Tim17)	16.296	52	0	236.9	1	1	60.2204	1.77974	0.00047819	3.3204	+	48	6	6	77.0297	1.88666	164.41	11	48	6	6	50.502	1.70331	17.419	6	52	8	8	56.139	1.74926	127.99	7
	2034	Tb927.9.11220	Tb927.9.11220	TbTim42	hypothetical protein, conserved	41.551	65.2	0	323.31	1	1	51.8504	1.71475	0.000307545	3.51209	+	65.2	27	27	61.8812	1.79156	152.07	39	52.5	23	23	44.119	1.64463	159.26	32	63.2	26	26	51.059	1.70807	146.56	28
	1847	Tb927.8.1740	Tb927.8.1740	TbTim62	hypothetical protein, conserved	62.143	64.4	0	323.31	1	1	45.5853	1.65882	0.000106777	3.97152	+	63.2	30	30	49.2514	1.69242	125.2	45	57.1	26	26	40.902	1.61174	124.65	31	64.4	31	31	47.023	1.67231	146.51	44
	1837	Tb927.8.1420	Tb927.8.1420	ACAD	acyl-CoA dehydrogenase, mitochondrial precursor, putative	55.982	59.2	0	323.31	1	1	35.1257	1.54562	0.00090072	3.04541	+	59.2	29	29	28.9679	1.46192	131.68	36	54.3	29	29	31.607	1.49978	137.64	56	59.2	29	29	47.334	1.67517	111.16	42
	1493	Tb927.5.3340	Tb927.5.3340	TbTim11	hypothetical protein, conserved	11.094	47.4	0	47.82	1	1	26.8053	1.42822	0.000338223	3.4708	+	47.4	4	4	30.8233	1.48888	82.318	3	33.7	3	3	22.945	1.36069	18.461	3	33.7	3	3	27.233	1.4351	156.54	7
	319	Tb927.10.11520	Tb927.10.11520	TbTim13	hypothetical protein, conserved	13.421	74.4	0	127.96	1	1	25.9318	1.41383	0.000252255	3.59816	+	73.5	11	11	27.6113	1.44109	108.43	16	73.5	10	10	22.413	1.3505	133.8	12	74.4	12	12	28.178	1.44991	183.43	14
	1206	Tb927.3.1600	Tb927.3.1600	Tim10	hypothetical protein, conserved	11.872	88.2	0	163.15	1	1	25.8225	1.412	0.000229923	3.63842	+	88.2	10	10	27.8831	1.44534	9.1185	14	81.4	9	9	22.466	1.35153	151.55	10	81.4	9	9	27.487	1.43913	166.68	9
	843	Tb927.11.1620	Tb927.11.1620		hypothetical protein, conserved	21.598	69.3	0	177.27	1	1	25.0251	1.39838	0.000831552	3.08011	+	66.1	15	15	31.3372	1.49606	18.784	8	66.1	14	14	19.875	1.29831	216.36	13	64.6	12	12	25.163	1.40076	189.25	11
	1683	Tb927.7.2200	Tb927.7.2200	Tim10	hypothetical protein, conserved	8.8073	85.9	0	64.937	1	1	21.536	1.33316	0.000263661	3.57895	+	64.1	6	6	23.2802	1.36699	87.824	10	74.4	7	7	18.708	1.27203	198.93	14	85.9	9	9	22.934	1.36048	180.55	16
	1378	Tb927.4.3430	Tb927.4.3430	TbTim12	hypothetical protein, conserved	12.369	57.8	0	168.49	1	1	21.3773	1.32995	0.000315508	3.50099	+	57.8	7	7	19.6541	1.29345	13.348	5	57.8	6	6	19.939	1.2997	31.856	8	57.8	7	7	24.929	1.3967	5.9289	6
	2199	Tb927.9.8260	Tb927.9.8260	TimRhom I	rhomboid-like protein,serine peptidase, Clan S- , family S54, putative	36.786	41.6	0	92.187	1	1	20.0758	1.30267	0.000890046	3.05059	+	41.6	9	9	25.4414	1.40554	13.802	6	33.1	8	8	16.494	1.21733	9.6717	7	28.3	7	7	19.282	1.28515	182.32	9
	1913	Tb927.8.4150	Tb927.8.4150	TimRhom II	hypothetical protein, conserved	33.246	15	0	164.18	1	1	18.2082	1.26027	0.000490258	3.30958	+	14.7	5	5	21.7089	1.33664	12.076	6	14.3	4	4	16.019	1.20464	33.732	6	15	6	6	17.359	1.23952	210.46	5
	383	Tb927.10.13830	Tb927.10.13830	TbPam27	chaperone protein DNAj, putative	27.234	51.2	0	118.08	1	1	17.8266	1.25107	0.00103925	2.98328	+	45.4	10	10	19.2987	1.28553	102.23	10	44.6	9	9	13.788	1.1395	128.96	11	38.3	8	8	21.29	1.32818	153.95	9
	997	Tb927.11.5390	Tb927.11.5390	Tim8-13	hypothetical protein, conserved	9.795	89.2	0	200.34	1	1	15.9607	1.20305	0.00262099	2.58154	+	89.2	8	8	22.6265	1.35462	23.123	7	67.5	5	5	15.953	1.20284	43.015	6	88	7	7	11.264	1.05169	176.81	4
	1163	Tb927.2.4445	Tb927.2.4445		hypothetical protein, conserved	15.441	18	0	107.42	1	1	11.85	1.07372	0.00793463	2.10047	+	18	2	2	21.5992	1.33444	159.83	3	18	2	2	10.369	1.01574	153.01	3	18	2	2	7.4298	0.870977	248.29	3
	369	Tb927.10.13230	Tb927.10.13230		hypothetical protein, conserved	50.454	3.5	0.0069995	2.176	1		9.24186	0.965759	0.0351665	1.45387	+	3.5	1	1	11.8275	1.07289	NaN	1	3.5	1	1	7.2215	0.858627	NaN	1	0	0	0				0
	1007	Tb927.11.5600	Tb927.11.5600	ATOM14	hypothetical protein, conserved	13.577	78.2	0	119.24	1	1	6.95392	0.84223	0.000392487	3.40617	+	77.3	10	10	6.96573	0.842967	84.696	13	54.6	8	8	6.3237	0.800971	10.044	9	48.7	8	8	7.634	0.882752	11.082	9
	1065	Tb927.11.7780	Tb927.11.7780	ATOM46	hypothetical protein, conserved	46.237	65.2	0	323.31	1	1	6.90993	0.839474	0.000762249	3.1179	+	49.6	15	15	7.35835	0.866781	48.82	29	58.9	19	19	5.9448	0.774137	26.9	40	52	17	17	7.5423	0.877504	17.092	32
	834	Tb927.11.15850	Tb927.11.15850		kinteoplast poly(A) polymerase complex 1 subunit	86.756	31.6	0	109.35	1	1	6.68266	0.824949	0.00310245	2.50829	+	23.5	14	14	5.6802	0.754364	43.984	22	22.7	17	17	5.8225	0.765109	109.33	24	21.9	17	17	9.0235	0.955375	103.5	26
	2222	Tb927.9.9660	Tb927.9.9660	ATOM40	hypothetical protein, conserved	38.295	64.1	0	323.31	1	1	6.65611	0.823221	0.000537874	3.26932	+	63.8	18	18	6.74172	0.828771	12.094	20	61	18	18	5.9414	0.773889	24.171	19	64.1	19	19	7.3621	0.867002	14.536	20
	1605	Tb927.6.3680	Tb927.6.3680		hypothetical protein, conserved	27.875	28.5	0	50.583	1	1	6.53767	0.815423	0.000967239	3.01447	+	24.8	6	6	7.27802	0.862013	65.677	7	28.5	7	7	5.5562	0.744778	71.018	6	24.8	5	5	6.91	0.839478	27.188	6
	309	Tb927.10.11030	Tb927.10.11030	ATOM11	hypothetical protein, conserved	11.261	39	0	10.35	1	1	6.52278	0.814433	0.000190618	3.71984	+	27	2	2	6.48887	0.812169	0.33065	2	39	4	4	6.1388	0.788083	15.99	3	27	2	2	6.967	0.843046	15.859	2
	1472	Tb927.5.2630	Tb927.5.2630		hypothetical protein, conserved	27.306	4.2	0.0024728	2.7982	1		6.44257	0.809059	0.00144543	2.84	+	4.2	1	1	6.4973	0.812733	NaN	1	0	0	0				0	4.2	1	1	6.3883	0.805385	NaN	1
	1259	Tb927.3.3550	Tb927.3.3550		hypothetical protein, conserved	128.86	16.5	0	65.344	1	1	6.3189	0.800641	0.00115957	2.9357	+	10.1	9	9	5.3217	0.72605	31.093	5	11.6	10	10	7.1669	0.855331	13.253	5	13.4	12	12	6.6152	0.820543	54.974	11
	1980	Tb927.8.6520	Tb927.8.6520		hypothetical protein, conserved	48.547	22.1	0	39.533	1	1	6.06796	0.783043	0.00182499	2.73874	+	5.3	2	2	4.88759	0.689094	31.795	2	9	3	3	6.9418	0.841472	23.358	4	22.1	7	7	6.5851	0.818562	43.718	6
	1918	Tb927.8.4380	Tb927.8.4380	ATOM12	hypothetical protein, conserved	11.86	40	0	47.567	1	1	6.0523	0.781921	0.0005922	3.22753	+	22.9	3	3	6.51254	0.81375	12.347	6	40	5	5	5.3502	0.72837	26.377	5	23.8	4	4	6.3627	0.803641	7.5667	4
	1600	Tb927.6.3530	Tb927.6.3530		hypothetical protein, conserved	30.913	22.9	0	24.52	1	1	5.96392	0.775532	0.000499032	3.30187	+	14.6	4	4	6.42715	0.808018	16.791	3	22.9	6	6	5.3392	0.727476	6.1954	3	15.7	4	4	6.1816	0.791101	51.46	4
	1174	Tb927.2.4950	Tb927.2.4950		hypothetical protein, conserved	155.91	2.2	0	9.3365	1	1	5.95462	0.774854	0.0142503	1.84617	+	1.3	1	1				0	2.2	3	3	5.4972	0.740142	5.9161	2	1.8	2	2	6.4501	0.809566	47.122	3
	952	Tb927.11.3980	Tb927.11.3980		mitochondrial processing peptidase alpha subunit, putative,metallo-peptidase, Clan ME, Family M16	57.037	54.1	0	323.31	1	1	5.91501	0.771956	0.00156205	2.80631	+	49.2	23	23	5.23149	0.718626	27.905	39	51	24	24	5.4909	0.739644	44.38	48	51	27	27	7.2044	0.857598	83.518	49
	1606	Tb927.6.3800;Tb927.6.3750;Tb927.6.3740	Tb927.6.3800;Tb927.6.3750;Tb927.6.3740	TbmHsp70	heat shock 70 kDa protein, mitochondrial precursor, putative ;heat shock 70 kDa protein, mitochondrial precursor, putative ;heat shock 70 kDa protein, mitochondrial precursor, putative	71.474	71.7	0	323.31	3	1	5.89515	0.770495	0.000776725	3.10973	+	68	54	54	5.70744	0.756441	51.945	174	68.3	55	55	5.3246	0.726287	63.576	184	65.3	56	56	6.7415	0.828757	73.584	190
	1427	Tb927.5.1060	Tb927.5.1060		mitochondrial processing peptidase, beta subunit, putative,metallo-peptidase, Clan ME, Family M16	54.122	73.6	0	304.12	1	1	5.65169	0.752178	0.00202815	2.6929	+	60.5	23	23	4.76236	0.677822	23.079	44	66.7	22	22	5.4529	0.736628	42.232	58	66.9	24	24	6.9516	0.842085	73.82	53
	542	Tb927.10.4910	Tb927.10.4910	MCP4	mitochondrial carrier protein (MCP4)	77.979	5.4	0	34.63	1	1	5.54321	0.743761	0.00949069	2.0227	+	5.4	2	2	8.3668	0.922559	75.161	2	3.1	1	1	3.6515	0.562471	NaN	1	3.1	1	1	5.5751	0.746253	NaN	1
	721	Tb927.11.11460	Tb927.11.11460	ATOM69	hypothetical protein, conserved	68.998	66.8	0	323.31	1	1	5.47233	0.738172	0.00043366	3.36285	+	52.3	28	28	5.74911	0.759601	32.399	52	48.6	30	30	4.9507	0.694667	28.954	51	57	32	32	5.7577	0.760249	61.217	58
	720	Tb927.11.11380	Tb927.11.11380		hypothetical protein, conserved	61.504	23.6	0	45.876	1	1	5.4153	0.733623	0.00355646	2.44898	+	17.3	7	7	4.58484	0.661324	16.819	8	19.8	8	8	4.8094	0.682091	34.523	7	21.5	9	9	7.202	0.857453	25.801	6
	683	Tb927.11.1010	Tb927.11.1010		chaperone protein DNAj, putative	41.739	17.5	0	35.682	1	1	5.38051	0.730824	0.00126674	2.89731	+	9.4	3	3	4.54112	0.657163	16.946	7	13.2	4	4	5.8253	0.765318	7.0067	3	15.1	4	4	5.8883	0.76999	14.878	3
	2132	Tb927.9.3620	Tb927.9.3620		hypothetical protein, conserved	25.222	19.9	0	20.432	1		5.32463	0.726289	0.000437465	3.35906	+	19.9	4	4	4.823	0.683317	77.209	5	19.9	4	4	5.6101	0.748971	164.39	3	19.9	4	4	5.5793	0.74658	24.913	4
	953	Tb927.11.4020	Tb927.11.4020		hypothetical protein, conserved	19.159	8	0.0043	2.4236	1	1	5.23972	0.719308	0.0468313	1.32946	+	0	0	0				0	4.9	1	1	6.6974	0.825906	NaN	1	8	1	1	4.0993	0.61271	NaN	1
	1162	Tb927.2.4400	Tb927.2.4400		hypothetical protein, conserved	136.9	47.3	0	273.98	1	1	5.07295	0.705261	0.00092145	3.03553	+	39.7	36	36	4.45772	0.649113	34.403	40	39.2	39	39	5.1702	0.713507	65.438	52	45.4	43	43	5.6645	0.753162	47.782	50
	1580	Tb927.6.2610	Tb927.6.2610		hypothetical protein, conserved	11.414	9.5	0	4.9192	1	1	4.99373	0.698425	0.000317728	3.49795	+	9.5	2	2	4.60702	0.66342	64.027	3	9.5	2	2	5.2404	0.719364	16.907	2	9.5	1	1	5.1581	0.71249	NaN	1
	2059	Tb927.9.12710	Tb927.9.12710		hypothetical protein, conserved	44.783	17.8	0	26.454	1	1	4.98879	0.697995	0.000446909	3.34978	+	5.8	2	2	4.54256	0.657301	26.032	2	17.8	4	4	5.1311	0.71021	15.498	4	3.6	1	1	5.3269	0.726475	NaN	1
	1012	Tb927.11.5820	Tb927.11.5820		hypothetical protein, conserved	32.267	3.3	0	3.7714	1	1	4.93579	0.693356	0.00147732	2.83053	+	3.3	1	1	4.96524	0.695941	15.187	2	3.3	1	1	4.2333	0.626679	10.82	2	3.3	1	1	5.7207	0.757449	28.171	3
	1793	Tb927.7.640	Tb927.7.640		hypothetical protein, conserved	37.365	24.9	0	54.414	1	1	4.92918	0.692775	0.00161482	2.79188	+	20.7	6	6	4.12014	0.614912	72.9	6	24.9	8	8	5.254	0.72049	19.606	7	24.9	8	8	5.5325	0.742921	98.955	7
	726	Tb927.11.11620	Tb927.11.11620		hypothetical protein, conserved	27.683	48.7	0	140.4	1	1	4.87118	0.687634	0.00506702	2.29525	+	35.7	7	7	3.53845	0.548812	69.206	7	42	9	9	5.56	0.745075	86.839	7	34.5	8	8	5.8751	0.769015	107.79	9
	2037	Tb927.9.11350	Tb927.9.11350		hypothetical protein, conserved	34.472	7.1	0	17.42	1		4.62508	0.665119	0.00121123	2.91677	+	4.8	1	1	3.97915	0.59979	NaN	1	4.8	1	1	4.9284	0.692706	NaN	1	7.1	2	2	5.045	0.702861	6.2424	2
	620	Tb927.10.8010	Tb927.10.8010		hypothetical protein, conserved	28.355	29.5	0	40.664	1	1	4.59788	0.662558	0.000511358	3.29127	+	26.2	5	5	4.87805	0.688246	20.433	4	25	5	5	4.1734	0.62049	3.0829	4	21.7	4	4	4.7746	0.678937	134.88	3
	963	Tb927.11.4330	Tb927.11.4330		hypothetical protein, conserved	21.02	21.2	0	21.211	1	1	4.53412	0.656493	0.00762722	2.11763	+	16.9	2	2	4.30404	0.633876	24.18	3	21.2	3	3	3.3658	0.527088	14.943	3	16.9	2	2	6.4345	0.808515	27.765	3
	1656	Tb927.6.830	Tb927.6.830		hypothetical protein, conserved	22.112	9.7	0.0024679	2.7686	1		4.48665	0.651922	0.00284775	2.5455	+	3.6	1	1	4.54731	0.657755	NaN	1	6.1	1	1	4.4268	0.64609	NaN	1	0	0	0				0
	1258	Tb927.3.3520	Tb927.3.3520		hypothetical protein, conserved	47.641	7.3	0	17.525	1		4.39967	0.64342	0.00300797	2.52173	+	2.1	1	1				0	3.3	1	1	4.3385	0.63734	26.286	3	5.2	2	2	4.4617	0.6495	22.769	3
	2040	Tb927.9.11560	Tb927.9.11560		hypothetical protein, conserved	36.042	11.4	0	36.125	1	1	4.30669	0.634143	0.000969943	3.01325	+	11.4	3	3	3.88259	0.589122	17.101	3	7.4	2	2	4.2452	0.627898	12.403	2	11.4	3	3	4.8463	0.68541	22.528	3
	1107	Tb927.11.9570	Tb927.11.9570		hypothetical protein, conserved	32.962	35.6	0	69.868	1	1	4.28142	0.631587	0.000773557	3.11151	+	26.8	5	5	4.13206	0.616167	23.318	5	35.6	7	7	3.9659	0.598342	27.256	5	35.6	7	7	4.7891	0.680254	42.489	5
	1455	Tb927.5.2030	Tb927.5.2030		hypothetical protein, conserved	45.543	4	0.0052232	2.3795	1		4.21373	0.624667	0.00166221	2.77932	+	0	0	0				0	4	1	1	4.2455	0.627929	2.2654	2	4	1	1	4.1822	0.621405	NaN	1
	2033	Tb927.9.11120	Tb927.9.11120		hypothetical protein, conserved	72.949	19.1	0	43.488	1	1	4.18516	0.621712	0.00036277	3.44037	+	13.8	8	8	3.9847	0.600395	14.253	8	16.3	10	10	4.0736	0.609978	18.09	8	15.8	10	10	4.5161	0.654764	13.674	6
	1754	Tb927.7.4310	Tb927.7.4310		hypothetical protein, conserved	53.736	18.2	0	37.513	1	1	4.16654	0.619776	0.00517946	2.28572	+	18.2	6	6	4.42497	0.645911	29.935	5	18.2	6	6	3.1546	0.498944	37.789	6	18.2	6	6	5.1817	0.714472	93.963	5
	1923	Tb927.8.4550	Tb927.8.4550		hypothetical protein, conserved	21.585	39.3	0	66.903	1	1	4.09071	0.611798	0.00274623	2.56126	+	5.5	1	1	3.68949	0.566967	16.635	2	39.3	6	6	3.6777	0.565576	3.3943	3	34.4	5	5	5.0449	0.702853	26.055	5
	831	Tb927.11.15700	Tb927.11.15700		hypothetical protein, conserved	19.138	32.9	0	27.179	1	1	4.08189	0.610862	0.000311333	3.50677	+	32.9	6	6	3.80793	0.580689	29.189	4	32.9	6	6	4.1888	0.62209	44.837	6	32.9	6	6	4.2639	0.629807	92.215	6
	1335	Tb927.4.1370	Tb927.4.1370		hypothetical protein, conserved	17.643	21.9	0	20.426	1	1	3.97016	0.598808	0.0016809	2.77446	+	17.2	3	3	3.55101	0.550352	8.7203	3	21.9	4	4	3.7997	0.579749	11.783	4	21.9	4	4	4.6379	0.666321	4.7526	3
	1135	Tb927.2.2520;Tb927.2.2510	Tb927.2.2520;Tb927.2.2510	VDAC	voltage-dependent anion-selective channel ;voltage-dependent anion-selective channel	29.189	88.5	0	323.31	2	1	3.85799	0.586361	0.000958619	3.01835	+	84.1	20	20	4.09618	0.612379	58.639	54	82.6	20	20	3.4272	0.534939	32.916	59	88.5	25	25	4.0904	0.611766	26.009	62
	1316	Tb927.3.750	Tb927.3.750		hypothetical protein, conserved	37.79	27.2	0	44.035	1	1	3.81689	0.58171	0.000550153	3.25952	+	18.9	6	6	4.08797	0.611508	8.2781	6	27.2	8	8	3.5118	0.54553	8.348	7	24.3	6	6	3.8734	0.588092	29.044	5
	1512	Tb927.5.4040	Tb927.5.4040		hypothetical protein, conserved	94.263	33.5	0	158.15	1	1	3.81529	0.581527	0.00171207	2.76648	+	25.1	17	17	3.26851	0.51435	21.158	28	32.7	21	21	4.025	0.604766	66.079	29	29.1	20	20	4.2215	0.625467	24.009	29
	208	Tb11.v5.0736;Tb927.5.3420	Tb11.v5.0736;Tb927.5.3420		hypothetical protein, conserved ;hypothetical protein, conserved	54.843	7.6	0	3.7236	2	1	3.78968	0.578603	0.00540911	2.26687	+	2.1	1	1	2.90977	0.463858	NaN	1	1.6	1	1	3.9974	0.601778	NaN	1	3.9	1	1	4.6792	0.670172	NaN	1
	1692	Tb927.7.2410	Tb927.7.2410		hypothetical protein, conserved	66.378	24.8	0	68.239	1	1	3.66332	0.563875	0.00166109	2.77961	+	13.8	9	9	3.15657	0.499215	55.989	14	17.2	10	10	4.0106	0.603209	11.279	9	22.7	13	13	3.8833	0.589201	40.598	10
	1891	Tb927.8.3110;Tb11.v5.0685	Tb927.8.3110;Tb11.v5.0685		hypothetical protein, conserved ;hypothetical protein, conserved	50.157	8.1	0	4.4891	2	1	3.65013	0.562309	0.00205027	2.68819	+	2	1	1	3.96747	0.598513	NaN	1	6.1	2	2	3.0908	0.490071	2.306	2	1.8	1	1	3.9659	0.598342	NaN	1
	1676	Tb927.7.1800	Tb927.7.1800		hypothetical protein, conserved	26.566	5.5	0	4.527	1	1	3.60573	0.556993	0.00161654	2.79141	+	5.5	1	1	3.29979	0.518486	15.705	2	5.5	1	1	3.4082	0.532525	NaN	1	5.5	1	1	4.1684	0.619969	NaN	1
	1739	Tb927.7.3940	Tb927.7.3940	MCP16	mitochondrial carrier protein,adenine nucleotide mitochondrial translocator, putative (MCP16)	36.34	40.8	0	201.69	1		3.58421	0.554393	0.00211838	2.674	+	37.8	9	9	3.77259	0.576639	16.211	8	40.8	11	11	3.0451	0.483602	16.676	10	37.8	9	9	4.0081	0.602939	12.959	10
	1449	Tb927.5.1790	Tb927.5.1790		hypothetical protein, conserved	71.956	21.4	0	84.919	1	1	3.57279	0.553008	0.00313975	2.50311	+	15.4	8	8	3.17581	0.501855	24.244	8	15.1	8	8	3.2848	0.516509	85.075	12	18.4	10	10	4.3718	0.64066	46.665	11
	1542	Tb927.6.1250;Tb11.v5.0743	Tb927.6.1250		hypothetical protein, conserved	56.918	17.3	0	35.535	2	1	3.55502	0.550842	0.00333276	2.4772	+	17.3	6	6	3.52497	0.547156	20.922	6	15.3	5	5	2.9817	0.474464	10.205	5	12.4	4	4	4.2747	0.630906	19.632	4
	1864	Tb927.8.2180	Tb927.8.2180		hypothetical protein, conserved	18.676	9.8	0	3.1425	1	1	3.49238	0.543121	0.000272271	3.565	+	9.8	1	1	3.52014	0.546559	NaN	1	9.8	1	1	3.6573	0.563161	3.7608	2	9.8	1	1	3.3086	0.519644	NaN	1
	1088	Tb927.11.8910	Tb927.11.8910		NADH dehydrogenase subunit NB6M, putative	20.705	19.7	0	13.372	1	1	3.46255	0.539396	0.00503256	2.29821	+	19.7	4	4	4.05006	0.607461	48.14	3	12.1	2	2	2.7013	0.431573	24.919	3	5.8	1	1	3.7945	0.579155	NaN	1
	487	Tb927.10.2590	Tb927.10.2590		hypothetical protein, conserved	91.396	2.7	0	18.507	1	1	3.39283	0.530563	0.00711207	2.148	+	2.7	2	2	2.5563	0.407612	28.391	3	1.4	1	1	4.194	0.622628	NaN	1	1.4	1	1	3.6429	0.561447	NaN	1
	507	Tb927.10.3270	Tb927.10.3270		hypothetical protein, conserved	18.206	20.8	0	67.432	1	1	3.34968	0.525003	0.00183301	2.73683	+	20.8	2	2	3.59842	0.556111	12.481	2	20.8	2	2	2.8924	0.461258	4.8742	2	20.8	2	2	3.6111	0.55764	10.012	2
	1738	Tb927.7.3930	Tb927.7.3930		hypothetical protein, conserved	160.79	3.5	0	6.8219	1	1	3.28835	0.516979	0.0412696	1.38437	+	0.9	1	1	1.59645	0.203155	NaN	1	1.7	2	2	4.3149	0.634971	NaN	1	1.9	2	2	5.1619	0.71281	10.496	2
	1777	Tb927.7.5700	Tb927.7.5700		hypothetical protein, conserved	35.717	25	0	106.47	1		3.27258	0.51489	0.00107139	2.97005	+	20.3	5	5	3.427	0.534915	12.679	4	18.1	5	5	2.9332	0.467342	16.556	7	22.8	6	6	3.4867	0.542415	10.211	5
	1005	Tb927.11.5500	Tb927.11.5500		mitochondrial RNA binding protein 1,mitochondrial edited mRNA stability factor 1,Mitochondrial poly(A) polymerase 1	94.96	16	0	115.01	1	1	3.26867	0.514371	0.00226766	2.64442	+	11.3	10	10	3.15348	0.49879	82.509	9	11.1	9	9	2.9073	0.46349	40.771	8	14.8	12	12	3.8092	0.580834	89.335	12
	1708	Tb927.7.2960	Tb927.7.2960		hypothetical protein, conserved	51.602	2.4	0	4.1062	1		3.22339	0.508313	0.00134448	2.87145	+	2.4	1	1	3.45197	0.538066	NaN	1	2.4	1	1	3.3981	0.531236	NaN	1	2.4	1	1	2.8552	0.455637	NaN	1
	1798	Tb927.7.6660	Tb927.7.6660		chaperone protein DNAj, putative	29.887	18.7	0	22.924	1	1	3.21861	0.507669	0.00196916	2.70572	+	18.7	4	4	3.56443	0.55199	11.438	4	18.7	4	4	2.7902	0.445635	4.6399	4	15.2	3	3	3.3526	0.525382	6.8652	3
	1008	Tb927.11.570	Tb927.11.570		hypothetical protein, conserved	21.079	12.3	0	7.1577	1	1	3.19946	0.505077	0.00525509	2.27942	+	12.3	2	2	2.59302	0.413807	2.6486	3	12.3	2	2	3.2125	0.506843	11.095	4	12.3	2	2	3.9317	0.59458	25.668	3
	869	Tb927.11.170	Tb927.11.170		hypothetical protein, conserved	53.155	2.6	0.0038517	2.4772	1	1	3.17702	0.502021	0.0204343	1.68964	+	0	0	0				0	2.6	1	1	2.9495	0.469748	NaN	1	2.6	1	1	3.4221	0.534293	NaN	1
	1850	Tb927.8.1850	Tb927.8.1850		mitochondrial calcium uptake 1	45.709	3.4	0	6.917	1		3.17587	0.501863	0.0353001	1.45222	+	0	0	0				0	3.4	1	1	2.7924	0.445978	NaN	1	3.4	1	1	3.612	0.557748	NaN	1
	2185	Tb927.9.7190	Tb927.9.7190		oxidoreductase, putative	49.92	19.3	0	22.805	1	1	3.15489	0.498985	0.00474552	2.32372	+	12.8	5	5	2.51953	0.401319	25.974	6	17.3	7	7	3.4808	0.541679	14.6	9	14.8	6	6	3.5806	0.553956	24.282	7
	748	Tb927.11.1250	Tb927.11.1250		kinteoplast poly(A) polymerase complex 1 subunit,mitochondrial edited mRNA stability factor 1 subunit	98.264	32.4	0	277.89	1	1	3.13775	0.496619	0.0016522	2.78194	+	27.6	18	18	2.78211	0.444374	47.578	31	32.4	22	22	3.1805	0.502495	40.397	35	26.5	16	16	3.4913	0.542987	22.777	31
	2025	Tb927.9.10560	Tb927.9.10560		hypothetical protein, conserved	19.035	28	0	91	1	1	3.0861	0.489411	0.000162568	3.78897	+	23.8	4	4	2.96331	0.471778	27.622	7	28	5	5	3.1548	0.498972	13.09	7	23.8	4	4	3.144	0.497483	8.7171	6
	343	Tb927.10.12300	Tb927.10.12300		hypothetical protein, conserved	15.636	11.3	0	4.6652	1		3.04356	0.483381	0.00254506	2.5943	+	11.3	1	1	2.80923	0.448587	NaN	1	11.3	1	1	2.8115	0.448938	NaN	1	11.3	1	1	3.5696	0.55262	NaN	1
	2207	Tb927.9.8710	Tb927.9.8710		hypothetical protein, conserved	19.729	31.4	0	60.316	1	1	3.01606	0.47944	0.00265463	2.576	+	31.4	5	5	2.87315	0.458358	37.297	10	31.4	5	5	2.7042	0.432039	58.425	7	27.2	4	4	3.5312	0.547922	47.718	6
	868	Tb927.11.16870	Tb927.11.16870		NADH dehydrogenase subunit NI8M, putative	18.805	44.2	0	34.701	1	1	2.98644	0.475153	0.00306838	2.51309	+	35.2	4	4	2.65301	0.423739	6.9077	5	39.4	4	4	2.8433	0.453823	8.4461	4	44.2	5	5	3.531	0.547898	8.0956	4
	743	Tb927.11.12230	Tb927.11.12230		heat shock protein HslVU, ATPase subunit HslU, putative,ATP-dependent hsl protease ATP-binding subunit hslU, putative	54.897	26	0	164.49	1	1	2.96056	0.471373	0.00693067	2.15922	+	24.6	9	9	2.39964	0.380145	20.039	15	21.4	8	8	2.8872	0.460477	25.174	14	22.8	9	9	3.7454	0.573498	17.171	10
	911	Tb927.11.270	Tb927.11.270	MCP10	mitochondrial carrier protein (MCP10)	33.969	19.7	0	52.444	1	1	2.95781	0.47097	0.00889854	2.05068	+	12.9	2	2	2.7784	0.443794	43.87	3	19.7	3	3	2.3812	0.376796	8.9809	2	5.5	1	1	3.9113	0.592321	NaN	1
	395	Tb927.10.14280	Tb927.10.14280	MCP20	mitochondrial carrier protein (MCP20)	21.072	7.9	0	5.8853	1	1	2.95268	0.470216	0.000230826	3.63672	+	7.9	1	1	2.97522	0.473519	NaN	1	7.9	1	1	3.0608	0.485835	NaN	1	7.9	1	1	2.8268	0.451295	NaN	1
	2017	Tb927.9.10070	Tb927.9.10070		hypothetical protein, conserved	32.855	10.1	0	10.638	1	1	2.94667	0.469331	0.0039593	2.40238	+	10.1	2	2	3.57539	0.553323	10.724	2	10.1	2	2	2.6882	0.429462	18.738	2	4.2	1	1	2.662	0.425208	NaN	1
	1196	Tb927.3.1080	Tb927.3.1080		hypothetical protein, conserved	28.428	22.3	0	17.693	1		2.88586	0.460275	0.00650741	2.18659	+	10.8	2	2	2.52915	0.402974	15.271	2	17.5	4	4	2.5801	0.411637	3.0542	4	15.5	3	3	3.6831	0.566214	12.832	3
	1529	Tb927.5.740	Tb927.5.740		hypothetical protein, conserved	23.911	10	0	7.5008	1	1	2.85569	0.455711	0.0123227	1.9093	+	5.3	1	1	2.67845	0.427884	NaN	1	10	2	2	2.2166	0.345687	47.838	3	5.3	1	1	3.9225	0.593563	NaN	1
	1050	Tb927.11.6980	Tb927.11.6980		hypothetical protein, conserved	68.158	42.2	0	130.35	1	1	2.84705	0.454395	0.00384658	2.41493	+	32.3	13	13	2.37383	0.37545	16.115	16	31.6	14	14	3.0322	0.481758	61.901	16	40.2	17	17	3.2061	0.505977	43.933	31
	553	Tb927.10.5420	Tb927.10.5420		hypothetical protein, conserved	152.79	2.6	0	9.462	1	1	2.78632	0.445032	0.0162481	1.7892	+	0.9	1	1	1.92149	0.283638	NaN	1	2.6	3	3	3.5745	0.553215	32.657	2	1.8	2	2	3.1495	0.498242	NaN	1
	760	Tb927.11.12960	Tb927.11.12960		hypothetical protein, conserved	10.664	35.9	0	10.818	1	1	2.7153	0.433818	0.0140735	1.8516	+	35.9	2	2	2.05656	0.31314	24.73	3	35.9	3	3	2.6235	0.418881	29.759	3	35.9	3	3	3.7105	0.569432	24.874	3
	1603	Tb927.6.3630	Tb927.6.3630	SPL	sphingosine 1-phosphate lyase, putative (SPL)	59.525	19.5	0	24.175	1		2.70708	0.432502	0.00859932	2.06554	+	13.9	4	4	2.20119	0.342657	46.439	4	17.5	5	5	2.6023	0.415357	17.285	5	10	3	3	3.4633	0.53949	21.916	3
	1317	Tb927.3.770	Tb927.3.770		hypothetical protein, conserved	21.212	26.5	0	8.6329	1	1	2.6857	0.429057	0.000251931	3.59872	+	0	0	0				0	19.9	3	3	2.6878	0.429397	7.6728	3	6.6	1	1	2.6836	0.428718	NaN	1
	888	Tb927.11.2220	Tb927.11.2220		hypothetical protein, conserved	50.086	7.2	0	7.7941	1	1	2.684	0.428782	0.0151388	1.81991	+	7.2	2	2	2.10478	0.323206	19.926	2	7.2	2	2	2.4323	0.386017	25.069	2	7.2	2	2	3.7768	0.577124	NaN	1
	864	Tb927.11.16750	Tb927.11.16750		hypothetical protein, conserved	25.871	6	0	6.6202	1	1	2.62129	0.418515	0.0133847	1.87339	+	6	1	1	1.94288	0.288446	NaN	1	6	1	1	2.7494	0.439238	30.302	2	6	1	1	3.3718	0.527862	56.276	2
	1059	Tb927.11.7390	Tb927.11.7390		hypothetical protein, conserved	34.924	13.6	0	6.4342	1	1	2.61333	0.417194	0.0031066	2.50771	+	11.2	2	2	2.24891	0.351972	14.317	2	13.6	3	3	2.7582	0.440626	15.02	3	13.6	3	3	2.8773	0.458985	24.68	3
	2062	Tb927.9.12770	Tb927.9.12770		hypothetical protein, conserved	116.54	26.5	0	266.63	1	1	2.60815	0.416333	0.00532543	2.27365	+	17	15	15	2.23489	0.349255	61.359	17	22.1	19	19	2.5258	0.402399	57.139	20	20.5	19	19	3.143	0.497344	60.903	21
	1172	Tb927.2.4830	Tb927.2.4830		TFIIF-stimulated CTD phosphatase, putative	38.807	17.9	0	39.8	1	1	2.53196	0.403457	0.00331545	2.47946	+	14.3	4	4	2.38789	0.378014	9.3951	4	17.9	5	5	2.3089	0.363405	21.984	5	14.3	4	4	2.9441	0.468953	13.925	4
	1760	Tb927.7.4800	Tb927.7.4800		hypothetical protein, conserved	12.152	9.7	0	4.4815	1	1	2.52863	0.402885	0.0133488	1.87456	+	9.7	1	1	2.8473	0.454433	NaN	1	9.7	1	1	1.8606	0.269653	NaN	1	9.7	1	1	3.0519	0.48457	NaN	1
	1898	Tb927.8.3260	Tb927.8.3260		hypothetical protein, conserved	22.139	24.6	0	8.076	1	1	2.51647	0.400792	0.000411394	3.38574	+	16.4	2	2	2.44696	0.388627	0.66354	2	5.1	1	1	2.6533	0.423786	NaN	1	13.3	2	2	2.4545	0.389963	7.5119	2
	1391	Tb927.4.4210	Tb927.4.4210		ATP-dependent zinc metallopeptidase, putative,metallo-peptidase, Clan MA(E) Family M41	96.221	9.5	0	13.763	1	1	2.5145	0.400451	0.00172173	2.76403	+	7.4	5	5	2.28284	0.358476	22.665	5	9.5	7	7	2.5287	0.402897	12.52	6	6.5	5	5	2.7541	0.43998	25.509	7
	1727	Tb927.7.3520	Tb927.7.3520		mitochondrial pyruvate carrier protein 2, putative	14.849	27.6	0	22.003	1	1	2.50739	0.399223	0.00577418	2.23851	+	27.6	2	2	3.02773	0.481118	17.565	3	27.6	2	2	2.4129	0.382539	2.2615	2	27.6	2	2	2.1578	0.334011	54.559	2
	1492	Tb927.5.3330;Tb11.v5.0867;Tb11.v5.0868	Tb927.5.3330		hypothetical protein, conserved	521.76	6.7	0	141.2	3	1	2.50053	0.398032	0.0104362	1.98146	+	4	17	17	2.14206	0.330832	38.177	16	5.9	25	25	2.2328	0.34885	28.75	27	5.9	25	25	3.269	0.514415	45.634	22
	1775	Tb927.7.5630	Tb927.7.5630		hypothetical protein, conserved	73.156	3.9	0	9.5689	1	1	2.49725	0.397462	0.000371762	3.42973	+	3.9	2	2	2.40604	0.381304	13.667	3	3.9	2	2	2.6186	0.418069	38.344	3	3.9	2	2	2.4718	0.393013	18.132	3
	239	Tb927.1.1770	Tb927.1.1770		glutaredoxin, putative	12.152	50.5	0	48.199	1	1	2.49371	0.396846	0.00292024	2.53458	+	43.9	5	5	2.81476	0.449441	23.292	5	50.5	6	6	2.2076	0.34392	13.701	8	50.5	6	6	2.4956	0.397175	15.429	6
	616	Tb927.10.7870	Tb927.10.7870		hypothetical protein, conserved	22.784	26.7	0	11.975	1	1	2.49166	0.396489	0.00450639	2.34617	+	15.2	3	3	2.9169	0.464921	44.563	4	26.7	5	5	2.158	0.334051	10.788	5	26.7	5	5	2.4575	0.390494	116.53	4
	1267	Tb927.3.3680	Tb927.3.3680		hypothetical protein, conserved	16.08	19.7	0	21.621	1	1	2.44386	0.388077	0.0429388	1.36715	+	13.1	2	2	4.27679	0.631118	72.262	3	19.7	3	3	1.8979	0.278273	17.723	3	13.1	1	1	1.7982	0.254838	13.115	2
	1903	Tb927.8.3450	Tb927.8.3450		hypothetical protein, conserved	16.536	19.3	0	25.956	1	1	2.40894	0.381826	0.00508585	2.29364	+	19.3	2	2	2.19655	0.341741	43.197	3	19.3	2	2	2.2096	0.344314	3.5127	2	19.3	2	2	2.8802	0.459423	13.313	2
	1176	Tb927.2.5020	Tb927.2.5020		acyl-CoA oxidase, putative	82.398	8	0	40.91	1	1	2.40748	0.381562	0.00141837	2.84821	+	5.5	4	4	2.24276	0.350782	17.612	3	3.2	2	2	2.3651	0.37385	11.829	2	4.7	2	2	2.6306	0.420055	11.057	2
	994	Tb927.11.5290	Tb927.11.5290	MCP9	mitochondrial carrier protein (MCP9)	29.883	35.8	0	51.602	1	1	2.39348	0.379031	0.00489767	2.31001	+	35.8	11	11	2.40085	0.380364	57.924	11	33	10	10	2.0555	0.312917	18.776	12	33	10	10	2.7785	0.44381	23.256	9
	685	Tb927.11.10150	Tb927.11.10150		hypothetical protein, conserved	137.64	28.8	0	323.31	1	1	2.3923	0.378816	0.00187257	2.72756	+	21.2	20	20	2.21966	0.346286	25.332	26	25.7	26	26	2.3244	0.366311	32.458	40	24.8	25	25	2.6537	0.423852	24.311	37
	148	Tb927.10.6300;Tb11.v5.0276	Tb927.10.6300;Tb11.v5.0276		hypothetical protein, conserved ;hypothetical protein, conserved	50.038	14.5	0	15.794	2	1	2.39136	0.378645	0.00131568	2.88085	+	12	4	4	2.2008	0.342581	29.32	4	14.5	5	5	2.421	0.383995	29.751	3	8.3	3	3	2.5666	0.409358	9.8408	3
	784	Tb927.11.13710	Tb927.11.13710		hypothetical protein, conserved	20.895	31.9	0	147.63	1	1	2.36435	0.373712	0.00669077	2.17452	+	31.9	4	4	2.27635	0.357239	31.993	6	31.9	4	4	2.0308	0.307667	7.2029	5	31.9	4	4	2.8591	0.456229	6.9461	5
	1440	Tb927.5.1520	Tb927.5.1520		heat shock protein HslVU, ATPase subunit HslU, putative	52.53	53.7	0	185.91	1	1	2.34625	0.370374	0.00628819	2.20147	+	52	22	22	1.95591	0.29135	33.72	33	52.2	22	22	2.4298	0.385571	33.966	36	53.5	23	23	2.7177	0.434202	39.837	36
	1928	Tb927.8.4690	Tb927.8.4690		hypothetical protein, conserved	13.31	38.7	0	14.712	1		2.33328	0.367967	0.00191845	2.71705	+	38.7	4	4	2.59007	0.413311	12.855	3	29.8	3	3	2.189	0.340246	14.995	3	29.8	3	3	2.2405	0.350345	27.772	3
	2030	Tb927.9.11040	Tb927.9.11040	MCP3	mitochondrial carrier protein (MCP3)	33.167	10.1	0	11.293	1	1	2.3305	0.36745	0.00249899	2.60224	+	3.6	1	1	2.13858	0.330125	5.3886	2	6.5	2	2	2.2624	0.354569	25.889	3	10.1	3	3	2.6161	0.417654	13.205	3
	2217	Tb927.9.9420	Tb927.9.9420		hypothetical protein, conserved	34.928	13.5	0	114.6	1	1	2.32913	0.367194	0.00518428	2.28531	+	13.5	3	3	2.07939	0.317936	2.9454	3	13.5	3	3	2.2	0.342423	16.868	3	10.3	2	2	2.762	0.441224	12.749	2
	698	Tb927.11.10600	Tb927.11.10600		hypothetical protein, conserved	42.461	9.4	0	4.3729	1		2.31165	0.363922	0.0316035	1.50027	+	9.4	2	2	2.07026	0.316026	34.878	2	9.4	2	2	1.6852	0.226651	76.275	2	9.4	2	2	3.5407	0.549089	17.88	2
	595	Tb927.10.7090	Tb927.10.7090	AOX	alternative oxidase (AOX)	37.59	19.8	0	20.125	1		2.29357	0.360511	0.000215673	3.6662	+	9.1	3	3	2.21784	0.345929	10.812	3	19.8	6	6	2.3165	0.364832	13.147	6	16.4	5	5	2.3484	0.370772	22.29	4
	722	Tb927.11.11470	Tb927.11.11470		hypothetical protein, conserved	32.022	28.4	0	51.744	1	1	2.28494	0.358874	0.00542973	2.26522	+	16	4	4	2.26214	0.354519	21.835	7	13.1	3	3	1.9763	0.295853	19.412	5	28.4	7	7	2.6684	0.426251	14.904	6
	568	Tb927.10.5900	Tb927.10.5900		hypothetical protein, conserved	51.739	2.8	0	5.7834	1	1	2.28335	0.358572	0.00941787	2.02605	+	2.8	1	1	1.97726	0.296064	NaN	1	2.8	1	1	2.1009	0.322405	NaN	1	2.8	1	1	2.8658	0.457246	NaN	1
	1441	Tb927.5.1530	Tb927.5.1530		hypothetical protein, conserved	59.943	2.2	0	6.0238	1	1	2.26115	0.35433	0.00918185	2.03707	+	2.2	1	1	2.58598	0.412626	NaN	1	2.2	1	1	1.8098	0.257631	NaN	1	2.2	1	1	2.4702	0.392732	NaN	1
	922	Tb927.11.3100	Tb927.11.3100		hypothetical protein, conserved	39.598	14.9	0	45.25	1		2.24612	0.351434	0.00104577	2.98056	+	12.4	4	4	2.27707	0.357377	24.583	4	14.9	5	5	2.0944	0.32106	9.1107	5	14.9	5	5	2.3761	0.375865	9.9391	5
	2206	Tb927.9.8680	Tb927.9.8680		cytochrome c oxidase assembly factor, putative	30.64	10.3	0	7.8331	1	1	2.23679	0.349625	0.00304351	2.51662	+	10.3	3	3	1.98886	0.298605	18.292	3	10.3	3	3	2.2793	0.357801	6.9636	2	10.3	3	3	2.4687	0.392468	20.457	3
	706	Tb927.11.10870	Tb927.11.10870	ERAP32	32 kDa ER-associated protein (ERAP32)	27.317	21.1	0	26.619	1	1	2.22564	0.347454	0.00426223	2.37036	+	21.1	5	5	2.02245	0.305878	20.165	5	21.1	5	5	2.5765	0.41103	14.953	5	21.1	5	5	2.1157	0.325454	19.647	5
	1277	Tb927.3.4240	Tb927.3.4240		thioredoxin, putative	21.78	19.5	0	13.121	1	1	2.21765	0.345893	0.0207219	1.68357	+	19.5	2	2	1.63287	0.212951	11.506	2	19.5	2	2	2.2982	0.361388	18.425	2	19.5	2	2	2.9063	0.46334	31.992	2
	947	Tb927.11.3860	Tb927.11.3860		hypothetical protein, conserved	50.409	16	0	21.265	1	1	2.18602	0.339654	0.00799322	2.09728	+	8.4	4	4	1.78984	0.252814	30.488	4	13.1	6	6	2.4356	0.386606	13.793	4	8.4	4	4	2.3963	0.379541	10.632	4
	1300	Tb927.3.5410	Tb927.3.5410		hypothetical protein, conserved	23.48	9.9	0	7.0159	1	1	2.18478	0.339408	0.000900452	3.04554	+	5.9	1	1	2.18838	0.340122	NaN	1	9.9	2	2	2.3122	0.364025	21.652	2	5.9	1	1	2.061	0.314078	NaN	1
	800	Tb927.11.14360	Tb927.11.14360	MCP2	mitochondrial carrier protein (MCP2)	38.053	23.9	0	18.69	1	1	2.18173	0.338802	0.0025475	2.59389	+	10	3	3	2.39177	0.37872	22.27	3	10.9	3	3	1.972	0.294907	30.414	3	18	4	4	2.2018	0.342778	21.482	3
	1396	Tb927.4.440	Tb927.4.440		hypothetical protein, conserved	13.767	12.5	0	4.3668	1		2.17947	0.338351	0.00473723	2.32448	+	12.5	1	1	1.98922	0.298682	NaN	1	12.5	1	1	2.0518	0.312135	13.72	2	12.5	1	1	2.5365	0.404235	15.859	2
	1289	Tb927.3.4920	Tb927.3.4920		LETM1 and EF-hand domain-containing protein 1, putative	42.737	28.6	0	94.353	1	1	2.14471	0.331369	0.00188665	2.72431	+	26.5	7	7	2.26835	0.355709	57.044	8	22	7	7	1.9535	0.290813	12.938	8	25.1	7	7	2.2263	0.347584	61.229	7
	1951	Tb927.8.560	Tb927.8.560		hypothetical protein, conserved	64.616	20.3	0	69.296	1		2.14273	0.330967	0.00501972	2.29932	+	17.5	7	7	2.30702	0.363051	48.306	5	16.5	6	6	1.8372	0.264156	19.828	7	16.5	6	6	2.3211	0.365694	27.142	6
	137	Tb927.10.5220;Tb11.v5.0235	Tb927.10.5220;Tb11.v5.0235		hypothetical protein, conserved ;hypothetical protein, conserved	51.172	17.9	0	173.27	2	1	2.14193	0.330805	0.00240833	2.61828	+	15.9	6	6	2.04211	0.310079	15.256	8	15.9	6	6	2.0208	0.305523	23.219	7	17.9	7	7	2.3813	0.376814	38.69	10
	700	Tb927.11.10780	Tb927.11.10780		hypothetical protein, conserved	30.902	21.5	0	12.253	1	1	2.13581	0.329562	0.000574309	3.24085	+	11.1	3	3	2.02914	0.307312	3.6571	4	21.5	5	5	2.1817	0.338795	23.054	4	11.1	3	3	2.2008	0.342581	7.5622	5
	1716	Tb927.7.3240	Tb927.7.3240		hypothetical protein, conserved	19.285	19.6	0	8.4028	1	1	2.13223	0.328835	0.0177034	1.75194	+	9.2	1	1	1.79695	0.254535	NaN	1	14.7	2	2	1.8907	0.276623	14.076	2	19.6	3	3	2.8533	0.455347	11.152	3
	2121	Tb927.9.2620	Tb927.9.2620		hypothetical protein, conserved	76.723	9.3	0	42.803	1	1	2.129	0.328175	0.00149598	2.82508	+	8.1	5	5	2.14312	0.331046	35.099	6	7.8	5	5	2.2793	0.357801	19.797	5	7.8	5	5	1.9755	0.295677	36.325	6
	1502	Tb927.5.3640	Tb927.5.3640		hypothetical protein, conserved	30.64	18.5	0	17.039	1	1	2.12862	0.328099	0.0155396	1.80856	+	18.5	4	4	2.5137	0.400313	18.204	6	18.5	4	4	1.6243	0.210666	17.774	6	14.1	3	3	2.3622	0.373317	20.253	3
	741	Tb927.11.12200	Tb927.11.12200		hypothetical protein, conserved	10.796	42.4	0	21.022	1	1	2.12613	0.32759	0.00560549	2.25139	+	42.4	3	3	1.88345	0.274955	41.455	6	42.4	3	3	2.0606	0.313994	11.922	4	42.4	3	3	2.4764	0.393821	19.596	4
	2210	Tb927.9.8950	Tb927.9.8950		CAAX prenyl protease 1, putative,metallo- peptidase, Clan M- Family M48	48.904	13.8	0	17.048	1		2.12601	0.327566	0.00412276	2.38481	+	13.8	5	5	2.42754	0.385166	20.807	6	13.8	5	5	1.926	0.284656	21.929	6	13.8	5	5	2.0553	0.312875	24.789	6
	710	Tb927.11.10960	Tb927.11.10960		hypothetical protein, conserved	71.772	8	0	12.227	1	1	2.11803	0.325932	0.0084772	2.07175	+	3.8	2	2	1.8382	0.264393	4.8355	2	4.9	3	3	2.017	0.304706	93.485	4	6	3	3	2.5627	0.408698	50.565	4
	734	Tb927.11.11870	Tb927.11.11870		hypothetical protein, conserved	38.266	7.7	0	30.468	1	1	2.09428	0.321035	0.00576398	2.23928	+	3.2	1	1	2.29695	0.361151	22.349	2	7.7	2	2	1.7856	0.251784	9.9748	3	7.7	2	2	2.2396	0.35017	25.227	3
	1959	Tb927.8.580	Tb927.8.580		hypothetical protein, conserved	40.102	12.4	0	7.0593	1	1	2.08816	0.319764	0.00317382	2.49842	+	12.4	4	4	1.90698	0.280346	5.5904	4	12.4	4	4	2.0473	0.311181	7.6338	4	12.4	4	4	2.3322	0.367766	17.531	3
	1813	Tb927.7.7410	Tb927.7.7410		oxidoreductase, putative	35.787	69	0	323.31	1	1	2.07892	0.317838	0.00300913	2.52156	+	69	20	20	1.87031	0.271914	33.691	30	62.4	18	18	2.2745	0.356886	30.238	25	69	19	19	2.1121	0.324714	42.024	35
	1279	Tb927.3.4380	Tb927.3.4380		Tob55, putative	53.558	2.5	0	3.6131	1	1	2.07112	0.316206	0.0131524	1.881	+	2.5	1	1	2.61732	0.417857	NaN	1	2.5	1	1	1.936	0.286905	NaN	1	2.5	1	1	1.7533	0.243856	NaN	1
	1812	Tb927.7.740	Tb927.7.740		chaperone protein DNAj, putative	61.973	9.1	0	38.769	1	1	2.06826	0.315606	0.00340385	2.46803	+	6.2	2	2	1.9492	0.289857	7.2471	2	9.1	3	3	2.3332	0.367952	5.6839	3	6.2	2	2	1.9454	0.289009	13.89	2
	1328	Tb927.3.970	Tb927.3.970		hypothetical protein, conserved	39.639	18.9	0	36.548	1	1	2.06187	0.31426	0.00118858	2.92497	+	14.6	4	4	2.15174	0.33279	19.705	5	18.9	5	5	2.1193	0.326192	16.087	6	18.9	5	5	1.9222	0.283799	21.556	5
	415	Tb927.10.14860	Tb927.10.14860		hypothetical protein, conserved	83.434	35.9	0	301.11	1	1	2.05048	0.311855	0.00346609	2.46016	+	32.8	19	19	1.93521	0.286728	14.267	21	24.7	16	16	1.9266	0.284792	20.221	20	32.7	19	19	2.3123	0.364044	14.435	20
	1141	Tb927.2.2970	Tb927.2.2970	MCP13	mitochondrial carrier protein (MCP13)	33.962	38.8	0	72.134	1	1	2.04041	0.309717	0.0100174	1.99924	+	35.3	9	9	2.06757	0.31546	18.681	11	35.3	9	9	1.6979	0.229912	9.1438	10	34	9	9	2.4198	0.383779	14.487	12
	2022	Tb927.9.10470	Tb927.9.10470		hypothetical protein, conserved	46.829	6.4	0	8.0589	1	1	2.03855	0.309322	0.002141	2.66938	+	6.4	3	3	1.97761	0.296141	21.12	3	6.4	3	3	1.9171	0.282645	5.8694	4	4.4	2	2	2.2345	0.34918	2.2877	3
	1179	Tb927.2.5140	Tb927.2.5140		hypothetical protein, conserved	17.408	14.8	0	9.64	1	1	2.03788	0.309179	0.0145529	1.83705	+	14.8	2	2	1.65396	0.218525	1.0319	2	14.8	3	3	2.0132	0.303887	15.817	3	14.8	3	3	2.5417	0.405124	14.371	3
	1260	Tb927.3.3570	Tb927.3.3570		hypothetical protein, conserved	18.439	7.4	0	8.7673	1	1	2.02995	0.307485	0.0235727	1.62759	+	7.4	1	1	2.09402	0.320981	NaN	1	7.4	1	1	1.5184	0.181386	NaN	1	7.4	1	1	2.6308	0.420088	NaN	1
	1889	Tb927.8.3070	Tb927.8.3070		hypothetical protein, conserved	17.047	20	0	7.8649	1	1	2.02315	0.306028	0.0112511	1.9488	+	12.4	2	2	1.65898	0.219841	5.0622	2	20	3	3	2.4004	0.380284	26.174	3	12.4	2	2	2.0795	0.317959	4.8638	2
	1794	Tb927.7.6410	Tb927.7.6410		hypothetical protein, conserved	159.31	1.8	0	5.0914	1	1	2.01402	0.304064	0.0121405	1.91576	+	0.8	1	1	1.63369	0.213171	NaN	1	1.8	2	2	2.0959	0.321371	6.4	3	1	1	1	2.3859	0.377652	3.6204	2
	1320	Tb927.3.810	Tb927.3.810		hypothetical protein, conserved	36.047	10.2	0	28.644	1	1	2.01154	0.30353	0.006657	2.17672	+	5.1	1	1	2.34725	0.37056	NaN	1	10.2	2	2	1.7799	0.250396	8.09	2	10.2	2	2	1.9482	0.289634	23.931	2
	1943	Tb927.8.5280	Tb927.8.5280		hypothetical protein, conserved	28.693	19.8	0	17.663	1	1	2.01136	0.30349	0.00464593	2.33293	+	19.8	3	3	2.23349	0.348984	18.881	3	19.8	3	3	1.7714	0.248317	4.3094	3	19.8	3	3	2.0567	0.313171	11.054	3
	2201	Tb927.9.8380	Tb927.9.8380		hypothetical protein, conserved	17.149	36.6	0	8.6195	1		1.98646	0.298079	0.000925832	3.03347	+	36.6	4	4	1.92823	0.285159	24.817	5	36.6	4	4	2.1075	0.323768	16.735	4	36.6	4	4	1.9289	0.28531	14.977	4
	1940	Tb927.8.5200	Tb927.8.5200		hypothetical protein, conserved	201.55	27.5	0	187.41	1	1	1.98102	0.296889	0.00641165	2.19303	+	24.6	39	39	1.77239	0.248559	38.485	43	26.5	44	44	1.9044	0.279758	38.084	49	24.6	38	38	2.3033	0.362351	68.452	45
	361	Tb927.10.12840	Tb927.10.12840	MCP12	mitochondrial carrier protein (MCP12)	33.131	48.4	0	196.32	1	1	1.96951	0.294357	0.0021675	2.66404	+	48.4	15	15	1.81683	0.259314	14.039	20	45.1	13	13	1.9828	0.297279	12.711	22	44.4	14	14	2.1207	0.326479	24.744	27
	1977	Tb927.8.6410	Tb927.8.6410		short-chain dehydrogenase, putative	52.913	13.1	0	20.374	1	1	1.96816	0.294061	0.0091528	2.03845	+	11.6	4	4	1.8348	0.263588	20.294	4	13.1	5	5	2.3659	0.373996	8.2183	5	8.2	3	3	1.7563	0.244599	24.578	3
	1037	Tb927.11.6470	Tb927.11.6470		hypothetical protein, conserved	15.746	44.1	0	85.645	1	1	1.96797	0.294018	0.0039947	2.39852	+	44.1	5	5	1.84475	0.265937	18.69	9	42.8	4	4	1.8589	0.269256	18.577	5	29.7	3	3	2.2226	0.346861	10.322	6
	1377	Tb927.4.3300	Tb927.4.3300		mitochondrial ATP-dependent zinc metallopeptidase, putative,metallo-peptidase, Clan MA(E) Family M41	78.872	8.2	0	19.716	1	1	1.96222	0.292747	0.00161657	2.79141	+	4.2	3	3	2.08199	0.318478	9.3804	3	7	5	5	1.9874	0.298285	54.664	4	8.2	6	6	1.8259	0.261477	34.998	4
	916	Tb927.11.2930	Tb927.11.2930		hypothetical protein, conserved	13.477	22.3	0	19.673	1	1	1.94756	0.28949	0.01124	1.94924	+	22.3	2	2	1.67023	0.222776	7.7317	4	22.3	2	2	1.8739	0.272746	14.391	3	22.3	2	2	2.3602	0.372949	12.873	3
	211	Tb11.v5.0778;Tb927.7.680	Tb11.v5.0778;Tb927.7.680		chaperone protein DNAj, putative ;chaperone protein DNAj, putative	49.945	10.6	0	62.513	2		1.94705	0.289377	0.00210226	2.67731	+	10.6	3	3	1.88747	0.27588	32.49	4	10.6	3	3	1.8437	0.26569	16.14	3	10.6	3	3	2.1211	0.326561	14.646	3
	827	Tb927.11.15440	Tb927.11.15440		hypothetical protein, conserved	23.683	7.8	0	3.2255	1	1	1.94356	0.288598	0.0150991	1.82105	+	7.8	2	2	1.84478	0.265945	9.1591	3	7.8	2	2	1.6339	0.213225	2.2085	2	3.9	1	1	2.4357	0.386624	NaN	1
	1890	Tb927.8.3090	Tb927.8.3090		hypothetical protein, conserved	16.292	8.1	0.00050582	3.0222	1	1	1.93871	0.287512	0.00865085	2.06294	+	8.1	1	1	1.81907	0.259851	NaN	1	8.1	1	1	1.7356	0.23945	NaN	1	8.1	1	1	2.308	0.363236	NaN	1
	2018	Tb927.9.10160	Tb927.9.10160		hypothetical protein, conserved	25.412	10.7	0	3.8352	1	1	1.92628	0.284719	0.0181359	1.74146	+	10.7	1	1	1.54971	0.190252	NaN	1	10.7	1	1	1.9083	0.280647	NaN	1	10.7	1	1	2.4169	0.383259	NaN	1
	2073	Tb927.9.13530	Tb927.9.13530	TbPam16	hypothetical protein, conserved	18.484	6.6	0	3.5981	1	1	1.92562	0.28457	0.00286584	2.54275	+	6.6	1	1	1.8623	0.27005	NaN	1	6.6	1	1	1.8052	0.256525	NaN	1	6.6	1	1	2.1239	0.327134	NaN	1
	1766	Tb927.7.5260	Tb927.7.5260		hypothetical protein, conserved	22.68	29	0	20.338	1	1	1.92514	0.284463	0.0015522	2.80905	+	29	5	5	1.83645	0.263978	7.3298	8	28	4	4	2.0689	0.315739	16.101	6	29	5	5	1.8779	0.273672	24.11	11
	446	Tb927.10.1580	Tb927.10.1580		hypothetical protein, conserved	12.232	74.6	0	58.124	1	1	1.92093	0.283512	0.0059818	2.22317	+	74.6	6	6	1.79507	0.254082	11.09	6	43	4	4	1.7799	0.250396	4.9899	3	57.9	6	6	2.2185	0.346059	23.131	6
	270	Tb927.1.4230	Tb927.1.4230		hypothetical protein, conserved	49.86	8.5	0	13.731	1		1.91942	0.283171	0.00114675	2.94053	+	8.5	3	3	2.01377	0.304011	24.398	3	8.5	3	3	1.8099	0.257655	8.6434	3	5.6	2	2	1.9402	0.287847	18.791	2
	1810	Tb927.7.7230	Tb927.7.7230	NTR	nitroreductase (NTR)	35.522	10.3	0	9.4466	1	1	1.91841	0.28294	0.0172812	1.76243	+	10.3	2	2	2.44846	0.388893	44.781	2	10.3	2	2	1.6283	0.211734	10.877	2	10.3	2	2	1.7709	0.248194	8.4606	2
	458	Tb927.10.180	Tb927.10.180		ATP synthase F1 subunit gamma protein, putative	34.37	54.1	0	125.61	1	1	1.91731	0.282692	0.00908486	2.04168	+	51.8	12	12	1.71636	0.234607	13.355	11	37.7	11	11	1.7962	0.254355	7.7103	13	46.2	12	12	2.2862	0.359114	39.908	11
	2060	Tb927.9.12730	Tb927.9.12730		chaperone protein DNAj, putative	48.592	50.6	0	212.07	1	1	1.9154	0.282258	0.00702397	2.15342	+	47.9	17	17	1.7411	0.240823	22.502	26	45.9	17	17	1.8059	0.256694	21.382	21	48.8	17	17	2.2349	0.349258	12.131	25
	1066	Tb927.11.7790	Tb927.11.7790		hypothetical protein, conserved	22.038	14.4	0	4.5867	1	1	1.90758	0.280483	0.0292653	1.53365	+	6.9	1	1	2.5888	0.413098	NaN	1	7.4	1	1	1.4796	0.170144	NaN	1	14.4	2	2	1.8122	0.258206	8.4236	2
	1139	Tb927.2.2940	Tb927.2.2940		hypothetical protein, conserved	32.208	8.4	0	7.1472	1	1	1.90689	0.280327	0.000954192	3.02036	+	8.4	2	2	1.89915	0.27856	30.181	2	4	1	1	2.0063	0.302396	NaN	1	4	1	1	1.8198	0.260024	NaN	1
	112	Tb11.0400;Tb927.11.7700;Tb11.0300	Tb11.0400;Tb927.11.7700;Tb11.0300	P27	P27 protein, putative (P27) ;hypothetical protein ;hypothetical protein,chrXI additional, unordered contigs	27.701	46.9	0	91.109	3	1	1.90469	0.279825	0.00648379	2.18817	+	39.4	8	8	1.75596	0.244514	11.366	12	46.1	10	10	1.7819	0.250883	9.3197	15	46.9	11	11	2.2084	0.344078	14.899	17
	887	Tb927.11.2190	Tb927.11.2190		hypothetical protein, conserved	11.175	48.5	0	37.33	1	1	1.90423	0.279719	0.00637596	2.19545	+	48.5	3	3	1.78747	0.252239	35.763	6	48.5	3	3	1.7523	0.243608	18.808	3	28.3	2	2	2.2045	0.34331	26.641	2
	2015	Tb927.9.10050	Tb927.9.10050		hypothetical protein, conserved	46.936	10.6	0	12.685	1	1	1.90113	0.279011	0.00748234	2.12596	+	10.6	4	4	1.88235	0.274701	9.43	4	10.6	4	4	1.6653	0.221492	14.344	4	8.5	3	3	2.192	0.340841	2.9983	2
	1295	Tb927.3.5240	Tb927.3.5240		hypothetical protein, conserved	66.655	14.5	0	43.058	1	1	1.88938	0.27632	0.000808113	3.09253	+	13.3	6	6	1.98118	0.296924	10.199	7	14.5	7	7	1.8762	0.273279	35.768	10	9.8	5	5	1.8145	0.258757	44.205	7
	1322	Tb927.3.860	Tb927.3.860	ACP	acyl carrier protein,acyl carrier protein, mitochondrial precursor, putative (ACP)	16.531	31.8	0	174.14	1	1	1.88798	0.275997	0.0044257	2.35402	+	31.8	6	6	1.70512	0.231754	9.4334	11	31.8	5	5	1.8793	0.273996	14.425	11	31.8	6	6	2.1001	0.32224	29.681	14
	1901	Tb927.8.3380	Tb927.8.3380		electron transfer protein, putative	27.259	26.4	0	16.341	1	1	1.88549	0.275423	0.0153372	1.81426	+	23.1	5	5	1.5939	0.202462	15.086	5	26.4	6	6	1.7958	0.254258	36.774	6	26.4	6	6	2.3418	0.36955	43.157	7
	1639	Tb927.6.4990	Tb927.6.4990		ATP synthase, epsilon chain, putative	20.147	52.7	0	165.26	1	1	1.88496	0.275303	0.0109232	1.96165	+	52.7	10	10	1.6039	0.205177	26.982	22	52.7	10	10	1.8721	0.272329	11.679	17	52.7	10	10	2.2305	0.348402	7.6437	12
	1217	Tb927.3.1840	Tb927.3.1840		3-oxo-5-alpha-steroid 4-dehydrogenase, putative	33.355	46.3	0	125.4	1	1	1.87723	0.273518	0.00138927	2.85721	+	37.6	12	12	1.898	0.278297	8.1927	17	40.3	15	15	1.7638	0.246449	5.5462	22	46.3	16	16	1.9761	0.295809	18.579	33
	578	Tb927.10.6200	Tb927.10.6200		hypothetical protein, conserved	12.255	29.8	0	7.908	1	1	1.87671	0.273397	0.00338482	2.47046	+	29.8	3	3	1.72417	0.236579	32.144	4	22.1	2	2	1.8581	0.269069	65.92	3	22.1	2	2	2.0632	0.314541	19.194	3
	2175	Tb927.9.6510	Tb927.9.6510		hypothetical protein, conserved	75.135	10.1	0	16.848	1	1	1.87575	0.273175	0.00328505	2.48346	+	10.1	6	6	1.86119	0.269791	22.591	11	10.1	6	6	1.7236	0.236436	21.077	10	10.1	6	6	2.0573	0.313298	26.845	11
	1696	Tb927.7.2630	Tb927.7.2630		hypothetical protein, conserved	99.937	1.7	0	6.7444	1		1.86988	0.271814	0.0308766	1.51037	+	0	0	0				0	1.7	1	1	1.7594	0.245365	NaN	1	1.7	1	1	1.9873	0.298263	NaN	1
	1769	Tb927.7.540	Tb927.7.540		chaperone protein DNAj, putative	50.644	4.8	0	6.679	1	1	1.86919	0.271653	0.0143969	1.84173	+	2.6	1	1	2.20391	0.343193	NaN	1	4.8	2	2	1.5232	0.182757	17.487	2	2.6	1	1	1.9454	0.289009	NaN	1
	2216	Tb927.9.9310	Tb927.9.9310		hypothetical protein, conserved	106.49	14.7	0	49.241	1	1	1.86615	0.270948	0.00292946	2.53321	+	11.6	8	8	1.86525	0.270738	15.723	10	10.5	8	8	1.7178	0.234973	14.291	10	12.5	10	10	2.0283	0.307132	10.431	8
	2116	Tb927.9.2270	Tb927.9.2270		hypothetical protein, conserved	78.354	8.2	0	50.342	1	1	1.8579	0.269023	0.0107314	1.96934	+	2.5	1	1	1.54823	0.189835	NaN	1	2.5	1	1	2.0853	0.319169	NaN	1	8.2	3	3	1.9864	0.298067	10.06	2
	1255	Tb927.3.3460	Tb927.3.3460		hypothetical protein, conserved	53.228	33.7	0	39.019	1	1	1.85708	0.26883	0.00730832	2.13618	+	29.2	10	10	1.65763	0.219488	31.477	12	32.3	10	10	1.8026	0.255899	25.8	17	27.3	9	9	2.1434	0.331103	27.922	16
	1017	Tb927.11.6000	Tb927.11.6000		hypothetical protein, conserved	40.82	5.7	0	4.3666	1	1	1.85635	0.26866	0.0101976	1.9915	+	5.7	2	2	1.58321	0.199537	5.3955	2	5.7	2	2	1.8709	0.272051	24.17	2	5.7	2	2	2.1597	0.334393	5.1327	2
	635	Tb927.10.8320	Tb927.10.8320	COXIX	cytochrome oxidase subunit IX (COXIX)	13.786	20.2	0	4.4611	1	1	1.84964	0.267086	0.0085966	2.06567	+	20.2	2	2	1.62061	0.20968	13.133	4	20.2	2	2	1.8183	0.259666	3.0037	2	20.2	2	2	2.1474	0.331913	3.9753	3
	492	Tb927.10.2800	Tb927.10.2800		hypothetical protein, conserved	18.838	43.1	0	69.402	1	1	1.84157	0.265187	0.00404076	2.39354	+	36.9	6	6	1.76205	0.246019	13.341	11	43.1	7	7	1.7246	0.236688	11.265	8	43.1	7	7	2.0552	0.312854	11.609	8
	210	Tb927.11.15780;Tb11.v5.0771	Tb927.11.15780;Tb11.v5.0771		hypothetical protein, conserved ;hypothetical protein, conserved	10.98	24.5	0	14.877	2	1	1.83085	0.262652	0.00615558	2.21073	+	24.5	3	3	1.92545	0.284532	17.469	5	20.4	2	2	1.6011	0.204418	13.169	3	13.3	2	2	1.9907	0.299006	9.6814	3
	1808	Tb927.7.7090	Tb927.7.7090		hypothetical protein, conserved	17.127	22.4	0	15.956	1	1	1.83077	0.262635	0.00831173	2.08031	+	15.8	2	2	1.72435	0.236624	7.8832	2	22.4	3	3	1.6622	0.220683	12.041	3	22.4	3	3	2.1409	0.330596	51.272	3
	727	Tb927.11.11630	Tb927.11.11630		hypothetical protein, conserved	28.476	17.4	0	22.976	1	1	1.82096	0.2603	0.0244406	1.61189	+	12.8	2	2	1.45313	0.162304	23.502	2	17.4	3	3	1.7784	0.250029	16.332	3	17.4	3	3	2.3365	0.368566	31.876	3
	663	Tb927.10.9760	Tb927.10.9760		alternative oxidase	39.673	5.1	0	9.9673	1	1	1.81818	0.259636	0.0257949	1.58847	+	5.1	1	1	1.74547	0.241914	NaN	1	5.1	1	1	1.4565	0.16331	NaN	1	5.1	1	1	2.3642	0.373684	NaN	1
	172	Tb927.10.15650;Tb11.v5.0465	Tb927.10.15650;Tb11.v5.0465		tRNA pseudouridine synthase A-like protein ;tRNA pseudouridine synthase A-like protein, putative	64.812	9.2	0	125.72	2	1	1.81592	0.259096	0.00522309	2.28207	+	9.2	4	4	1.92393	0.284189	20.751	4	7.4	3	3	1.606	0.205746	12.79	3	7.4	3	3	1.938	0.287354	13.237	3
	2089	Tb927.9.14420	Tb927.9.14420	PPIase	cyclophilin-like protein, putative (PPIase)	42.65	3.4	0	9.4825	1	1	1.81308	0.258417	0.028689	1.54228	+	3.4	1	1	1.86986	0.271809	NaN	1	3.4	1	1	1.3811	0.140225	NaN	1	3.4	1	1	2.3079	0.363217	NaN	1
	546	Tb927.10.5050	Tb927.10.5050		hypothetical protein, conserved	8.6908	29.3	0	47.894	1	1	1.80964	0.257592	0.0109982	1.95868	+	29.3	2	2	1.57361	0.196898	9.4484	4	29.3	2	2	1.7617	0.245932	44.424	4	29.3	2	2	2.1377	0.329947	1.2556	3
	823	Tb927.11.15360	Tb927.11.15360		hypothetical protein, conserved	14.57	12.2	0	11.672	1	1	1.8067	0.256886	0.0439308	1.35723	+	12.2	1	1	1.9614	0.292566	30.628	3	12.2	1	1	1.6642	0.221206	NaN	1	12.2	1	1				0
	1528	Tb927.5.690	Tb927.5.690		hypothetical protein, conserved	16.361	7.9	0	3.9712	1	1	1.80015	0.255308	0.0133594	1.87421	+	7.9	1	1	1.49517	0.174691	NaN	1	7.9	1	1	1.8698	0.271795	NaN	1	7.9	1	1	2.0866	0.319439	NaN	1
	329	Tb927.10.11900	Tb927.10.11900		hypothetical protein, conserved	19.531	16.8	0	110.91	1	1	1.7998	0.255223	0.004367	2.35982	+	16.8	2	2	1.6354	0.213625	15.559	2	16.8	2	2	1.9806	0.296797	7.0055	2	11.4	1	1	1.7999	0.255248	NaN	1
	353	Tb927.10.12550	Tb927.10.12550		hypothetical protein, conserved	33.804	3.7	0.0038703	2.5297	1	1	1.79762	0.254698	0.000456991	3.34009	+	3.7	1	1	1.85856	0.269177	NaN	1	3.7	1	1	1.7494	0.242889	NaN	1	3.7	1	1	1.7866	0.252027	NaN	1
	1044	Tb927.11.6700	Tb927.11.6700		hypothetical protein, conserved	15.205	11.4	0	4.4905	1	1	1.79416	0.253862	0.0209087	1.67967	+	11.4	1	1	1.73163	0.238456	13.917	2	11.4	1	1	1.478	0.169674	NaN	1	11.4	1	1	2.2566	0.353455	10.784	2
	1210	Tb927.3.1710	Tb927.3.1710		hypothetical protein, conserved	43.986	4	0.0074108	2.0929	1	1	1.79344	0.253686	0.0160588	1.79429	+	4	1	1	1.74505	0.241807	NaN	1	4	1	1	1.5121	0.179581	NaN	1	4	1	1	2.1861	0.33967	NaN	1
	1887	Tb927.8.3040	Tb927.8.3040		hypothetical protein, conserved	22.299	5.9	0	3.7294	1	1	1.7921	0.253362	0.0280768	1.55165	+	5.9	1	1	1.50625	0.177897	7.0906	2	5.9	1	1	1.6008	0.204337	NaN	1	5.9	1	1	2.387	0.377852	NaN	1
	2131	Tb927.9.3540	Tb927.9.3540		hypothetical protein, conserved	13.711	13.7	0	12.568	1	1	1.79115	0.253133	0.0167012	1.77725	+	13.7	1	1	1.99748	0.300483	6.9271	2	13.7	1	1	1.4395	0.158212	NaN	1	13.7	1	1	1.9985	0.300704	NaN	1
	2047	Tb927.9.11880	Tb927.9.11880		hypothetical protein, conserved	51.045	7	0	7.7054	1	1	1.78817	0.252409	0.0011062	2.95616	+	7	3	3	1.84379	0.265712	10.982	4	7	3	3	1.6931	0.228683	1.9624	3	7	3	3	1.8316	0.262831	32.163	4
	1564	Tb927.6.2080	Tb927.6.2080		hypothetical protein, conserved	45.886	26	0	29.07	1	1	1.78644	0.251989	0.0088598	2.05258	+	24	6	6	1.89025	0.27652	56.544	7	26	7	7	1.5304	0.184805	10.927	8	26	7	7	1.9708	0.294643	30.523	8
	203	Tb927.5.3000;Tb11.v5.0692	Tb927.5.3000;Tb11.v5.0692		hypothetical protein, conserved ;hypothetical protein, conserved	39.828	8.6	0	21.902	2		1.78606	0.251897	0.0217843	1.66186	+	8.6	2	2	1.71789	0.234995	16.397	2	8.6	2	2	1.47	0.167317	1.9796	2	4.9	1	1	2.2562	0.353378	NaN	1
	1211	Tb927.3.1720	Tb927.3.1720		hypothetical protein, conserved	11.172	33	0	57.191	1		1.78567	0.2518	0.01354	1.86838	+	33	3	3	1.47317	0.168252	11.359	4	33	3	3	1.9145	0.282055	5.2181	3	33	3	3	2.0188	0.305093	36.12	3
	1231	Tb927.3.2370	Tb927.3.2370		hypothetical protein, conserved	15.403	12.7	0	13.911	1	1	1.77906	0.25019	0.00465697	2.3319	+	12.7	1	1	1.74697	0.242285	NaN	1	12.7	1	1	1.6315	0.212587	7.9616	2	12.7	1	1	1.9756	0.295699	35.887	2
	909	Tb927.11.2680	Tb927.11.2680		hypothetical protein, conserved	80.025	1.4	0	12.064	1	1	1.77459	0.249098	0.0122468	1.91198	+	1.4	1	1	2.08338	0.318768	12.971	3	1.4	1	1	1.5178	0.181215	16.351	2	1.4	1	1	1.7673	0.24731	3.8512	2
	1612	Tb927.6.4040	Tb927.6.4040		hypothetical protein, conserved	28.009	8.7	0	5.7944	1	1	1.76991	0.247952	0.00133301	2.87517	+	4.1	1	1	1.77506	0.249214	NaN	1	8.7	3	3	1.86	0.269513	14.332	3	8.7	3	3	1.6793	0.225128	29.467	3
	561	Tb927.10.5660	Tb927.10.5660		heat shock protein, putative	37.873	6	0	6.1064	1	1	1.76548	0.246862	0.0468481	1.32931	+	0	0	0				0	6	1	1	1.9207	0.28346	NaN	1	6	1	1	1.6228	0.210265	NaN	1
	737	Tb927.11.12040	Tb927.11.12040		hypothetical protein, conserved	12.331	40.2	0	11.988	1	1	1.76541	0.246845	0.0155701	1.80771	+	23.4	2	2	1.68526	0.226667	4.8692	3	40.2	3	3	1.5194	0.181672	25.117	3	23.4	2	2	2.1488	0.332196	16.113	3
	855	Tb927.11.16530	Tb927.11.16530		hypothetical protein, conserved	117.5	13.8	0	56.249	1	1	1.76216	0.246044	0.00278185	2.55567	+	10.1	8	8	1.7173	0.234846	7.0021	6	11.2	8	8	1.6643	0.221232	17.389	7	10.1	8	8	1.9145	0.282055	19.581	10
	1632	Tb927.6.4560	Tb927.6.4560		hypothetical protein, conserved	47.192	14	0	71.488	1	1	1.74942	0.242895	0.0282236	1.54939	+	12	4	4	1.55674	0.192215	24.68	4	12.3	4	4	1.491	0.173478	39.781	4	14	5	5	2.3067	0.362991	28.126	6
	2087	Tb927.9.14160	Tb927.9.14160	RISP	rieske iron-sulfur protein, mitochondrial precursor (RISP)	33.655	12.8	0	13.446	1	1	1.74927	0.242857	0.0150624	1.82211	+	12.8	3	3	2.04152	0.309955	26.115	3	12.8	3	3	1.4533	0.162355	10.838	4	12.8	3	3	1.8041	0.256261	3.9445	5
	886	Tb927.11.2180	Tb927.11.2180		hypothetical protein, conserved	69.23	7	0	17.111	1		1.74833	0.242624	0.00383	2.4168	+	3	1	1	1.64428	0.215975	NaN	1	3	1	1	1.6867	0.227038	NaN	1	7	2	2	1.9269	0.284859	40.374	2
	1401	Tb927.4.4600	Tb927.4.4600		hypothetical protein, conserved	31.248	10.8	0	4.5296	1	1	1.73898	0.240295	0.0311639	1.50635	+	3.5	1	1				0	7.3	2	2	1.8361	0.263896	0.54858	2	6.5	2	2	1.647	0.216694	0.3947	2
	1695	Tb927.7.2620	Tb927.7.2620		hypothetical protein, conserved	34.549	3.1	0.0042918	2.4159	1	1	1.7356	0.23945	0.0157687	1.8022	+	0	0	0				0	3.1	1	1	1.6888	0.227578	NaN	1	3.1	1	1	1.7837	0.251322	NaN	1
	1086	Tb927.11.8800	Tb927.11.8800		hypothetical protein, conserved	30.621	19.5	0	15.561	1	1	1.73499	0.239297	0.0194	1.7122	+	19.5	4	4	1.38968	0.142915	9.6035	5	19.5	4	4	1.8929	0.277128	13.478	5	13.7	3	3	1.9854	0.297848	27.49	4
	1402	Tb927.4.4620	Tb927.4.4620	COXVIII	cytochrome oxidase subunit VIII (COXVIII)	18.729	6.4	0.0052207	2.3776	1	1	1.73453	0.239183	0.0334423	1.4757	+	6.4	1	1	1.59068	0.201584	NaN	1	6.4	1	1	1.4122	0.149896	35.244	2	6.4	1	1	2.3231	0.366068	NaN	1
	301	Tb927.10.10610	Tb927.10.10610		protein tyrosine phosphatase, putative	25.449	22.3	0	60.391	1	1	1.7212	0.235831	0.00224288	2.64919	+	17	3	3	1.84301	0.265528	3.9409	3	22.3	4	4	1.7005	0.230577	8.4305	4	17.9	3	3	1.627	0.211388	18.578	3
	365	Tb927.10.12930	Tb927.10.12930		hypothetical protein, conserved	23.985	40.1	0	58.34	1	1	1.7202	0.235579	0.000155614	3.80795	+	40.1	6	6	1.69107	0.228163	26.542	9	34.8	5	5	1.722	0.236033	28.66	8	39.1	6	6	1.748	0.242541	26.317	8
	378	Tb927.10.13620	Tb927.10.13620		NADH-ubiquinone oxidoreductase complex I subunit,FT putative	54.791	25.8	0	73.43	1	1	1.71843	0.235132	0.00417478	2.37937	+	23.9	8	8	1.61577	0.20838	19.326	9	23.7	8	8	1.6561	0.219087	12.959	7	25.8	9	9	1.8964	0.27793	22.666	8
	766	Tb927.11.13180	Tb927.11.13180		hypothetical protein conserved	61.21	22.9	0	186.2	1		1.71723	0.234829	0.000142759	3.8454	+	20.2	7	7	1.74782	0.242498	29.901	11	22.9	8	8	1.6952	0.229221	31.812	16	22.9	8	8	1.7091	0.232767	27.087	12
	1095	Tb927.11.9150	Tb927.11.9150		hypothetical protein, conserved	191.13	4	0	38.924	1	1	1.71278	0.233702	0.00222462	2.65274	+	2.9	4	4	1.74785	0.242505	30.633	4	4	6	6	1.597	0.203305	21.181	6	3.5	5	5	1.8001	0.255297	55.608	3
	1737	Tb927.7.3910	Tb927.7.3910		hypothetical protein, conserved	57.602	2.8	0	3.1423	1	1	1.70619	0.232028	0.00788784	2.10304	+	2.8	1	1	1.95312	0.29073	NaN	1	2.8	1	1	1.6132	0.207688	NaN	1	2.8	1	1	1.5764	0.197666	NaN	1
	1144	Tb927.2.3180;Tb11.v5.0782	Tb927.2.3180;Tb11.v5.0782	PPR1	kinetoplast polyadenylation/uridylation factor 1 (PPR1) ;hypothetical protein, conserved	114.38	20.4	0	189.79	2	1	1.70533	0.231807	0.00697564	2.15642	+	20.4	17	17	1.52889	0.184376	28.44	16	19.3	16	16	1.7015	0.230832	16.332	15	19.3	16	16	1.9064	0.280214	68.899	16
	1439	Tb927.5.1510	Tb927.5.1510		hypothetical protein, conserved	35.464	9.9	0	7.1725	1	1	1.70473	0.231657	0.00328913	2.48292	+	6.4	2	2	1.68294	0.226067	17.256	2	9.9	3	3	1.5926	0.202107	15.442	2	7.4	2	2	1.8484	0.266796	21.277	3
	1786	Tb927.7.6200	Tb927.7.6200		chaperone protein DNAj, putative	31.594	16.9	0	12.943	1	1	1.70379	0.231417	1.52638e-05	4.81634	+	8.5	2	2	1.69973	0.230379	15.128	2	9.5	2	2	1.6979	0.229912	NaN	1	16.9	4	4	1.7138	0.23396	8.1487	2
	954	Tb927.11.410	Tb927.11.410		hypothetical protein, conserved	14.836	42.3	0	32.368	1	1	1.69963	0.230355	0.00223647	2.65044	+	42.3	4	4	1.67191	0.223212	9.9311	4	42.3	4	4	1.6139	0.207877	21.801	5	42.3	4	4	1.8196	0.259976	43.868	4
	650	Tb927.10.9110	Tb927.10.9110		hypothetical protein, conserved	36.946	4.4	0.00050684	3.038	1	1	1.69283	0.228613	0.024778	1.60593	+	4.4	1	1	1.45096	0.161655	NaN	1	4.4	1	1	2.1527	0.332984	NaN	1	4.4	1	1	1.5531	0.191199	NaN	1
	679	Tb927.11.10040	Tb927.11.10040		hypothetical protein, conserved	13.539	23.8	0	11.259	1	1	1.69223	0.22846	0.0018187	2.74024	+	23.8	2	2	1.62499	0.21085	26.052	3	23.8	2	2	1.6551	0.218824	4.2133	4	23.8	2	2	1.8018	0.255707	9.4465	3
	667	Tb927.10.9820;Tb11.v5.0565	Tb927.10.9820;Tb11.v5.0565		mitochondrial intermediate peptidase, putative,metallo-peptidase, Clan MA(E) Family M3 ;mitochondrial intermediate peptidase, putative	76.732	16	0	47.971	2	1	1.69221	0.228453	0.0316999	1.49894	+	7.4	3	3	1.38475	0.141373	26.671	3	9.6	4	4	1.5827	0.199399	22.555	4	13.3	5	5	2.211	0.344589	18.016	3
	590	Tb927.10.6850	Tb927.10.6850		mitochondrial RNA binding complex 1 subunit,mitochondrial edited mRNA stability factor 1 subunit,kinteoplast poly(A) polymerase complex 1 subunit	36.918	6.2	0.0024667	2.767	1	1	1.68763	0.227278	0.00725464	2.13938	+	2.5	1	1	1.49289	0.174029	NaN	1	6.2	2	2	1.741	0.240799	18.169	2	2.5	1	1	1.8493	0.267007	NaN	1
	126	Tb927.7.4940;Tb11.v5.0175	Tb927.7.4940;Tb11.v5.0175		oligopeptidase B protein, putative,serine peptidase, clan SC, family S9A-like protein ;oligopeptidase B protein, putative	104.35	4.8	0	6.528	2	1	1.68555	0.226742	0.0320684	1.49392	+	1.3	1	1	1.74496	0.241785	NaN	1	2.3	2	2	1.3046	0.115477	5.3668	2	3.8	3	3	2.1036	0.322963	0.97648	2
	1514	Tb927.5.4120	Tb927.5.4120		hypothetical protein, conserved	22.32	22	0	11.919	1	1	1.68266	0.225997	0.00714063	2.14626	+	17.8	3	3	1.7518	0.243486	11.856	3	22	4	4	1.4875	0.172457	5.6268	5	22	4	4	1.8283	0.262047	24.065	6
	1069	Tb927.11.7920	Tb927.11.7920		hypothetical protein, conserved	47.989	6.8	0	3.3759	1		1.67283	0.223452	0.0226218	1.64547	+	6.8	2	2	1.6645	0.221285	19.866	2	6.8	2	2	1.3782	0.139312	23.011	2	6.8	2	2	2.0406	0.309758	21.422	2
	1568	Tb927.6.2180	Tb927.6.2180		hypothetical protein, conserved	20.01	12.8	0	12.859	1	1	1.67049	0.222843	0.00513316	2.28962	+	12.8	2	2	1.76109	0.245782	35.816	2	12.8	2	2	1.5043	0.177334	7.8742	2	12.8	2	2	1.7596	0.245414	12.627	2
	1417	Tb927.4.630	Tb927.4.630		hypothetical protein, conserved	33.88	9.6	0	4.8077	1	1	1.66763	0.222099	0.0332603	1.47807	+	9.6	3	3	1.31091	0.117572	24.442	3	7	2	2	1.6678	0.222144	2.0849	2	7	2	2	2.1212	0.326582	10.628	2
	988	Tb927.11.5060	Tb927.11.5060		hypothetical protein, conserved	119.59	14.7	0	65.645	1	1	1.65901	0.219848	0.00708253	2.14981	+	11.5	10	10	1.52075	0.182058	19.678	11	13.7	12	12	1.6095	0.206691	20.501	12	12.4	11	11	1.8655	0.270795	19.643	12
	1815	Tb927.7.7440	Tb927.7.7440		hypothetical protein, conserved	14.51	29.3	0	18.996	1	1	1.65225	0.218075	0.0187248	1.72758	+	29.3	4	4	1.3606	0.13373	46.395	5	29.3	4	4	1.7469	0.242268	6.709	5	29.3	4	4	1.8977	0.278228	24.387	4
	861	Tb927.11.16710	Tb927.11.16710		hypothetical protein, conserved	13.612	45.8	0	25.571	1	1	1.64558	0.216319	0.00712659	2.14712	+	24.6	3	3	1.50994	0.178958	19.575	4	44.1	5	5	1.5974	0.203414	14.896	7	39	5	5	1.8475	0.266584	23.661	7
	974	Tb927.11.4650	Tb927.11.4650		hypothetical protein, conserved	167.85	2.8	0	40.255	1	1	1.6431	0.215663	0.00181153	2.74195	+	2.8	3	3	1.57505	0.197295	18.744	4	2.8	3	3	1.6176	0.208871	24.463	4	2.8	3	3	1.7411	0.240824	33.329	3
	55	mito:COII	mito:COII		mitochondrially encoded protein	24.22	10	0	7.6279	1	1	1.64201	0.215377	0.00456798	2.34028	+	10	2	2	1.54162	0.187976	15.933	2	10	2	2	1.8031	0.25602	12.157	2	3.3	1	1	1.5927	0.202134	NaN	1
	1229	Tb927.3.2300	Tb927.3.2300		hypothetical protein, conserved	22.084	15.4	0	19.299	1	1	1.64189	0.215344	0.0280154	1.5526	+	15.4	2	2	1.71532	0.234346	22.276	2	15.4	2	2	1.5716	0.196342	6.7421	2	0	0	0				0
	1990	Tb927.8.6960;Tb04.24M18.150	Tb927.8.6960;Tb04.24M18.150		hypothetical protein, conserved ;hypothetical protein, conserved	42.527	13.8	0	20.99	2	1	1.63654	0.213926	0.00421325	2.37538	+	7.3	2	2	1.70683	0.232191	27.946	3	10.9	4	4	1.4943	0.174438	7.8523	4	9.9	3	3	1.7185	0.23515	31.076	3
	745	Tb927.11.12350	Tb927.11.12350		DNA photolyase, putative	95.302	2.2	0	8.9673	1	1	1.6359	0.213757	0.0174933	1.75713	+	0	0	0				0	2.2	2	2	1.5922	0.201998	16.154	2	1.2	1	1	1.6808	0.225516	NaN	1
	1931	Tb927.8.4860	Tb927.8.4860		hypothetical protein, conserved	76.539	2.1	0	4.0398	1	1	1.63249	0.212849	0.0322924	1.4909	+	2.1	1	1	1.55304	0.191182	NaN	1	2.1	1	1	1.716	0.234517	NaN	1	0	0	0				0
	1574	Tb927.6.2380	Tb927.6.2380		hypothetical protein, conserved	81.636	6.2	0	24.625	1	1	1.63067	0.212365	0.00650053	2.18705	+	6.2	3	3	1.49869	0.175711	18.095	3	3.6	2	2	1.8144	0.258733	21.076	2	3.6	2	2	1.5946	0.202652	20.068	2
	903	Tb927.11.2530	Tb927.11.2530		kinteoplast poly(A) polymerase complex 1 subunit,mitochondrial edited mRNA stability factor 1 subunit,mitochondrial RNA binding complex 1 subunit	84.864	20.9	0	71.234	1	1	1.6236	0.210478	0.00265837	2.57538	+	19.7	12	12	1.61993	0.209497	28.881	16	19.9	12	12	1.5286	0.184294	23.46	23	17.7	11	11	1.7284	0.237644	12.365	15
	787	Tb927.11.13830	Tb927.11.13830		hypothetical protein, conserved	36.135	3.5	0.0074349	2.1352	1	1	1.61796	0.208968	0.0413012	1.38404	+	0	0	0				0	3.5	1	1	1.5195	0.181701	NaN	1	3.5	1	1	1.7228	0.236235	NaN	1
	429	Tb927.10.15220	Tb927.10.15220		hypothetical protein, conserved	22.101	24.7	0	64.476	1	1	1.61572	0.208366	0.0137492	1.86172	+	24.2	4	4	1.54038	0.187628	7.1464	3	13.9	3	3	1.4465	0.160318	52.464	6	18.6	4	4	1.893	0.277151	19.939	6
	1895	Tb927.8.3170	Tb927.8.3170		hypothetical protein, conserved	90.466	1.5	0.00050736	3.0529	1	1	1.61362	0.2078	0.00281167	2.55104	+	1.5	1	1	1.69598	0.22942	3.7652	2	1.5	1	1	1.5045	0.177392	NaN	1	1.5	1	1	1.6466	0.216588	NaN	1
	1384	Tb927.4.3790	Tb927.4.3790		ubiquitin carboxyl-terminal hydrolase, putative,cysteine peptidase, Clan CA, family C19, putative	52.002	7.5	0	4.1669	1		1.61258	0.207523	0.00556119	2.25483	+	3.9	1	1	1.74938	0.242885	NaN	1	7.5	2	2	1.632	0.21272	16.86	2	3.9	1	1	1.4688	0.166963	NaN	1
	1789	Tb927.7.630	Tb927.7.630		hypothetical protein, conserved	28.188	15.6	0	20.269	1	1	1.61078	0.207036	0.00403399	2.39427	+	15.6	3	3	1.4935	0.174204	27.951	3	11.6	2	2	1.7338	0.238999	4.2419	2	11.6	2	2	1.614	0.207904	23.921	2
	1936	Tb927.8.5100	Tb927.8.5100		hypothetical protein, conserved	313.77	9.1	0	91.392	1	1	1.60849	0.206419	0.0141336	1.84975	+	6.7	17	17	1.52583	0.183507	15.778	16	6.9	18	18	1.4446	0.159748	42.68	18	5.2	13	13	1.888	0.276002	59.283	11
	806	Tb927.11.14700	Tb927.11.14700		hypothetical protein, conserved	61.94	6.2	0	10.368	1	1	1.60456	0.205356	0.0107917	1.96691	+	6.2	2	2	1.57701	0.197835	20.575	2	6.2	2	2	1.4335	0.156398	11.862	2	4	1	1	1.8274	0.261834	NaN	1
	1128	Tb927.2.2210	Tb927.2.2210		hypothetical protein, conserved	113.45	8	0	74.791	1	1	1.60438	0.205308	0.00134172	2.87234	+	8	5	5	1.53834	0.187053	23.961	4	6.4	4	4	1.6029	0.204906	28.179	4	8	5	5	1.6748	0.223963	32.895	3
	689	Tb927.11.10240	Tb927.11.10240		hslVU complex proteolytic subunit, putative,hslVU complex proteolytic subunit, threonine peptidase, Clan T(1), family T1B	22.684	24.9	0	13.076	1	1	1.59827	0.203651	0.00710896	2.14819	+	19.1	3	3	1.62025	0.209581	25.196	3	15.8	3	3	1.4404	0.158483	5.3479	3	15.8	3	3	1.7494	0.242889	34.905	4
	1325	Tb927.3.940	Tb927.3.940		hypothetical protein, conserved	18.107	29.2	0	8.3514	1	1	1.5895	0.201261	0.0100521	1.99774	+	29.2	3	3	1.48763	0.172495	21.584	3	16.2	2	2	1.4862	0.172077	NaN	1	16.2	2	2	1.8164	0.259211	2.5976	2
	610	Tb927.10.7610	Tb927.10.7610		hypothetical protein, conserved	165.1	8.2	0	24.727	1	1	1.5881	0.200879	0.00466169	2.33146	+	4.2	4	4	1.45817	0.163809	15.4	4	6.4	7	7	1.6171	0.208737	10.69	5	6.1	7	7	1.6986	0.230091	14.259	6
	876	Tb927.11.1950	Tb927.11.1950		hypothetical protein, conserved	24.799	11.7	0	9.8939	1	1	1.5834	0.19959	0.0145709	1.83651	+	4.5	1	1	1.50657	0.177989	NaN	1	11.7	2	2	1.8525	0.267758	53.16	2	11.7	2	2	1.4224	0.153022	10.684	2
	93	Tb06.3A7.270	Tb06.3A7.270		hypothetical protein, conserved	123.84	0.8	0.0024594	2.714	1	1	1.57342	0.196845	0.0396088	1.40221	+	0.8	1	1				0	0.8	1	1	1.4867	0.172223	75.326	2	0.8	1	1	1.6652	0.221466	NaN	1
	1222	Tb927.3.2080	Tb927.3.2080		hypothetical protein, conserved	30.66	26.5	0	32.637	1	1	1.57148	0.19631	0.00700376	2.15467	+	26.5	6	6	1.47759	0.169552	8.0133	5	26.5	6	6	1.5006	0.176265	18.227	6	20.8	4	4	1.7503	0.243112	14.487	5
	1577	Tb927.6.2490	Tb927.6.2490		hypothetical protein, conserved	28.031	23.8	0	45.283	1	1	1.56752	0.195214	0.00963547	2.01613	+	19.2	3	3	1.50786	0.178362	10.986	3	23.8	4	4	1.4398	0.158302	12.929	4	19.2	3	3	1.7741	0.248978	27.159	3
	254	Tb927.1.2990	Tb927.1.2990		hypothetical protein, conserved	115.95	14.6	0	35.048	1	1	1.56622	0.194854	0.0133112	1.87578	+	9.4	7	7	1.4228	0.153144	12.585	7	11	9	9	1.4882	0.172661	8.5318	10	13.5	11	11	1.8145	0.258757	15.091	11
	1220	Tb927.3.2010	Tb927.3.2010		hypothetical protein, conserved	62.262	7.6	0	22.085	1	1	1.56095	0.19339	0.00467295	2.33041	+	7.6	3	3	1.44867	0.160968	18.163	3	7.6	3	3	1.5596	0.193013	32.685	3	7.6	3	3	1.6834	0.226187	25.5	3
	535	Tb927.10.470	Tb927.10.470		choline dehydrogenase, putative	56.921	7	0	14.734	1	1	1.56089	0.193372	0.00331395	2.47965	+	7	3	3	1.49896	0.17579	8.2073	4	5.1	2	2	1.6786	0.224947	21.413	3	7	3	3	1.5114	0.179379	14.873	4
	1880	Tb927.8.2650	Tb927.8.2650		metallo-beta-lactamase-like protein, putative	40.315	27.2	0	37.054	1	1	1.55778	0.192507	0.00202358	2.69388	+	19	5	5	1.52952	0.184555	107.6	7	27.2	7	7	1.6467	0.216614	11.295	5	19	5	5	1.5009	0.176352	19.727	5
	1767	Tb927.7.5280	Tb927.7.5280		hypothetical protein, conserved	220.21	8.9	0	31.335	1	1	1.55429	0.191532	0.00241864	2.61643	+	5.3	8	8	1.46336	0.16535	20.489	8	8.1	12	12	1.5846	0.19992	27.297	14	6.1	9	9	1.6193	0.209327	58.012	12
	511	Tb927.10.3510;Tb11.v5.0886	Tb927.10.3510		hypothetical protein, conserved	197.82	5.7	0	21.707	2	1	1.55227	0.190966	0.00779782	2.10803	+	5.2	9	9	1.48683	0.172263	28.765	9	4.8	8	8	1.4514	0.161787	25.081	11	4.7	8	8	1.7332	0.238849	41.68	10
	1684	Tb927.7.2220	Tb927.7.2220		hypothetical protein, conserved	74.361	2.7	0.0034113	2.6056	1	1	1.55119	0.190665	0.0186323	1.72973	+	2.7	2	2	1.66176	0.220569	38.906	2	2.7	2	2	1.3045	0.115444	32.591	2	2.7	2	2	1.7218	0.235983	14.334	2
	978	Tb927.11.4780	Tb927.11.4780		pyruvate dehydrogenase (lipoamide) kinase, putative	51.187	7.4	0	4.9897	1	1	1.5511	0.19064	0.0105806	1.97549	+	7.4	2	2	1.73046	0.238162	12.35	2	7.4	2	2	1.56	0.193125	33.988	2	7.4	2	2	1.3824	0.140634	10.385	2
	1253	Tb927.3.3330	Tb927.3.3330		heat shock protein 20, putative	15.842	78.7	0	37.554	1	1	1.54888	0.190019	0.00310878	2.50741	+	78.7	10	10	1.56211	0.193711	17.823	13	78.7	10	10	1.4531	0.162296	13.168	11	70.9	10	10	1.637	0.214049	35.9	10
	1511	Tb927.5.3980	Tb927.5.3980		hypothetical protein, conserved	43.71	10.2	0	15.393	1	1	1.54769	0.189685	0.00591659	2.22793	+	10.2	3	3	1.5348	0.186052	19.06	5	10.2	3	3	1.4308	0.155579	11.162	4	10.2	3	3	1.6882	0.227424	12.173	3
	844	Tb927.11.16220	Tb927.11.16220		hypothetical protein, conserved	22.002	21.9	0	5.2376	1	1	1.54533	0.18902	0.0201861	1.69495	+	21.9	4	4	1.29953	0.113786	11.835	4	17.1	3	3	1.6132	0.207688	15.875	3	17.1	3	3	1.7603	0.245587	11.247	5
	1838	Tb927.8.1430	Tb927.8.1430		hypothetical protein, conserved	19.865	30.7	0	11.111	1	1	1.54198	0.188078	0.00747394	2.12645	+	18.7	3	3	1.38912	0.14274	45.116	4	30.7	5	5	1.6586	0.219742	28.398	6	18.7	3	3	1.5913	0.201752	25.11	4
	2094	Tb927.9.15010	Tb927.9.15010		hypothetical protein, conserved	23.182	14.7	0	19.758	1	1	1.53631	0.186479	0.0425923	1.37067	+	10.3	2	2	1.25734	0.0994526	22.636	3	14.7	3	3	1.4555	0.163012	25.534	5	14.7	3	3	1.9814	0.296972	10.378	3
	2020	Tb927.9.10310	Tb927.9.10310	MCP11	mitochondrial carrier protein (MCP11)	34.295	49.2	0	165.62	1	1	1.5336	0.185713	0.00714457	2.14602	+	49.2	14	14	1.41309	0.150169	12.888	17	42	13	13	1.5127	0.179753	8.3842	15	49.2	13	13	1.6874	0.227218	18.129	19
	491	Tb927.10.280	Tb927.10.280	COXVI	cytochrome oxidase subunit VI (COXVI)	19.154	30.4	0	19.139	1	1	1.53232	0.18535	0.0127909	1.8931	+	30.4	5	5	1.52809	0.18415	29.339	6	30.4	5	5	1.3602	0.133603	27.032	7	30.4	5	5	1.731	0.238297	20.368	6
	2183	Tb927.9.7150	Tb927.9.7150		RNA pseudouridylate synthase protein, putative	140.81	2.8	0	18.365	1	1	1.53226	0.185333	0.000528887	3.27664	+	2	2	2	1.55647	0.19214	21.34	3	1.8	2	2	1.4904	0.173303	54.577	3	2	2	2	1.5508	0.190556	33.783	3
	1869	Tb927.8.2300	Tb927.8.2300		hypothetical protein, conserved	25.468	35.3	0	12.881	1	1	1.53218	0.185311	0.000168751	3.77275	+	27.1	5	5	1.52033	0.181939	29.144	5	32.1	6	6	1.5564	0.192121	12.788	7	35.3	6	6	1.5201	0.181872	13.773	7
	647	Tb927.10.900	Tb927.10.900		hypothetical protein, conserved	19.158	16.4	0	6.9195	1	1	1.52969	0.184603	0.0184026	1.73512	+	6.4	1	1	1.47982	0.170208	NaN	1	16.4	2	2	1.3488	0.129948	14.617	3	16.4	2	2	1.7933	0.253653	30.579	3
	269	Tb927.1.4100	Tb927.1.4100	COXIV	cytochrome oxidase subunit IV (COXIV)	40.534	53.8	0	118.55	1	1	1.52808	0.184147	0.0030715	2.51265	+	51.6	17	17	1.47872	0.169886	20.434	25	51.8	17	17	1.4771	0.16941	17.647	24	49.6	16	16	1.6336	0.213146	22.786	22
	707	Tb927.11.10880	Tb927.11.10880		hypothetical protein, conserved	48.493	13	0	18.241	1	1	1.52792	0.1841	0.0249866	1.60229	+	10.7	4	4	1.27325	0.104915	24.225	5	13	5	5	1.5691	0.195651	12.832	5	10.7	4	4	1.7854	0.251736	21.894	6
	1561	Tb927.6.2010	Tb927.6.2010		hypothetical protein, conserved	58.952	52.4	0	211.41	1	1	1.52484	0.183224	0.00631398	2.1997	+	52	22	22	1.50338	0.177067	17.88	39	51.1	22	22	1.4148	0.150695	30.945	43	52.4	23	23	1.6669	0.22191	25.773	42
	1629	Tb927.6.4510	Tb927.6.4510		hypothetical protein, conserved	36.573	4.3	0.0052331	2.3896	1	1	1.52468	0.183177	0.0314613	1.50222	+	4.3	1	1	1.36567	0.135347	NaN	1	4.3	1	1	1.9041	0.27969	0.28728	2	4.3	1	1	1.363	0.134496	25.988	2
	165	Tb927.10.16150;Tb11.v5.0397	Tb927.10.16150;Tb11.v5.0397		ATP-dependent zinc metallopeptidase, putative ;ATP-dependent zinc metallopeptidase, putative	62.779	16.8	0	75.799	2	1	1.52279	0.182639	0.0175236	1.75638	+	16.8	5	5	1.30076	0.114198	12.076	4	16.8	5	5	1.7004	0.230551	22.627	4	10.9	3	3	1.5965	0.203169	24.967	5
	1709	Tb927.7.3030;Tb927.7.2990	Tb927.7.3030;Tb927.7.2990		hypothetical protein, conserved ;hypothetical protein, conserved	35.572	7.8	0	5.0501	2	1	1.52123	0.182195	0.0469104	1.32873	+	7.8	2	2	1.29789	0.113239	2.6687	2	7.8	2	2	1.3532	0.131362	5.9595	2	7.8	2	2	2.0044	0.301984	40.419	2
	540	Tb927.10.4880	Tb927.10.4880		hypothetical protein, conserved	25.965	17	0	32.135	1	1	1.51843	0.181396	0.00845932	2.07266	+	17	3	3	1.36806	0.136106	NaN	1	17	3	3	1.5517	0.190808	11.582	2	17	3	3	1.6492	0.217273	4.0814	2
	464	Tb927.10.1930	Tb927.10.1930		hypothetical protein, conserved	74.392	4.2	0	7.1327	1	1	1.51565	0.180598	0.0314147	1.50287	+	4.2	3	3	1.28199	0.107883	25.782	3	4.2	3	3	1.4585	0.163906	27.719	3	4.2	3	3	1.8621	0.270003	28.729	3
	807	Tb927.11.14730	Tb927.11.14730		metalloprotease, putative,cell division protein FtsH homologue, putative	74.475	30	0	172.62	1	1	1.51479	0.180351	0.0121678	1.91479	+	20.7	12	12	1.33917	0.126836	19.696	13	22.3	12	12	1.5464	0.189322	17.34	14	23.2	14	14	1.6784	0.224895	18.371	15
	1308	Tb927.3.5610	Tb927.3.5610		ribosomal protein L3 mitochondrial, putative	54.986	4	0	49.708	1	1	1.51174	0.179477	0.0260858	1.5836	+	4	1	1	1.29666	0.112827	NaN	1	4	1	1	1.4676	0.166608	NaN	1	4	1	1	1.8155	0.258996	NaN	1
	2125	Tb927.9.3170	Tb927.9.3170	COXV	cytochrome oxidase subunit V (COXV)	22.229	40.3	0	85.306	1	1	1.51108	0.179287	0.0050702	2.29498	+	40.3	6	6	1.41806	0.151694	11.661	9	40.3	6	6	1.4878	0.172545	16.542	13	40.3	6	6	1.6354	0.213624	11.133	11
	1082	Tb927.11.870	Tb927.11.870		hypothetical protein, conserved	28.776	20.7	0	34.167	1	1	1.51096	0.179252	0.00693535	2.15893	+	8.1	2	2	1.57265	0.196632	5.3166	2	20.7	4	4	1.3703	0.136816	29.821	5	20.7	4	4	1.6007	0.20431	23.992	4
	2050	Tb927.9.12120	Tb927.9.12120		unspecified product	35.685	9.1	0	4.2555	1		1.50871	0.178606	0.0385981	1.41343	+	9.1	2	2	1.6885	0.227502	3.1953	2	9.1	2	2	1.7182	0.235074	26.85	2	9.1	2	2	1.1837	0.0732416	45.386	2
	289	Tb927.1.90	Tb927.1.90		retrotransposon hot spot protein (RHS, pseudogene), putative	67.289	12.2	0	6.8656	1		1.4996	0.175977	0.0452083	1.34478	+	10.5	6	1	1.16683	0.067009	14.608	2	12.2	7	1	1.5936	0.202379	49.599	2	10.5	6	1	1.8136	0.258542	34.568	2
	2165	Tb927.9.5960	Tb927.9.5960		succinate dehydrogenase, putative	21.281	14.4	0	29.373	1	1	1.49909	0.175829	0.0205055	1.68813	+	14.4	2	2	1.28848	0.110077	10.523	5	14.4	2	2	1.5145	0.180269	20.047	5	14.4	2	2	1.7264	0.237141	19.293	3
	948	Tb927.11.3900	Tb927.11.3900		glycosyltransferase family-like protein, putative	31.198	7.6	0	3.3773	1	1	1.49794	0.175494	2.87418e-05	4.54149	+	2.9	1	1	1.48916	0.172941	NaN	1	7.6	2	2	1.5046	0.177421	9.2812	2	7.6	2	2	1.5001	0.17612	19.565	3
	736	Tb927.11.11950	Tb927.11.11950		cytochrome oxidase assembly protein, putative	43.527	12	0	24.938	1	1	1.49719	0.175276	0.00982366	2.00773	+	12	4	4	1.37586	0.138573	14.639	4	12	4	4	1.4601	0.164383	7.0452	5	12	4	4	1.6706	0.222872	7.3996	4
	339	Tb927.10.12220	Tb927.10.12220		hypothetical protein, conserved	41.133	8.9	0	15.537	1	1	1.49094	0.173461	0.0376374	1.42438	+	8.9	2	2	1.52256	0.182573	NaN	1	8.9	2	2	1.2073	0.0818152	NaN	1	8.9	2	2	1.803	0.255996	2.6108	2
	587	Tb927.10.670	Tb927.10.670		hypothetical protein, conserved	26.877	11.5	0	45.576	1	1	1.48636	0.172124	0.0164173	1.7847	+	11.5	2	2	1.35683	0.132527	15.203	2	11.5	2	2	1.7196	0.235427	14.467	2	11.5	2	2	1.4074	0.148418	18.563	2
	962	Tb927.11.4320	Tb927.11.4320		hypothetical protein, conserved	51.878	11.6	0	13.557	1	1	1.48416	0.17148	0.0217136	1.66327	+	6.1	2	2	1.25194	0.0975837	17.988	2	11.6	3	3	1.6138	0.20785	9.5649	3	4.4	1	1	1.6181	0.209005	NaN	1
	1955	Tb927.8.5680	Tb927.8.5680		hypothetical protein, conserved	66.873	2.8	0	98.678	1	1	1.48213	0.170886	0.042601	1.37058	+	2.8	1	1	1.26126	0.100803	NaN	1	2.8	1	1	1.3685	0.136245	NaN	1	2.8	1	1	1.8863	0.275611	NaN	1
	2195	Tb927.9.7830	Tb927.9.7830		hypothetical protein, conserved	22.986	31.3	0	12.934	1	1	1.4814	0.170672	0.0174922	1.75716	+	21.7	3	3	1.34975	0.130252	22.638	6	28.8	4	4	1.4001	0.146159	9.3895	4	31.3	5	5	1.7203	0.235604	9.6877	5
	2186	Tb927.9.7210	Tb927.9.7210		mitochondrial exoribonuclease DSS-1	83.345	1.3	0	5.0605	1	1	1.48075	0.170482	0.0207513	1.68295	+	1.3	1	1	1.55941	0.192959	NaN	1	1.3	1	1	1.2597	0.100267	NaN	1	1.3	1	1	1.6528	0.21822	NaN	1
	672	Tb927.10.9900	Tb927.10.9900		ABC1 protein, putative	62.856	11.9	0	20.673	1	1	1.48061	0.170441	0.0155549	1.80813	+	11.9	5	5	1.35566	0.13215	10.956	6	11.9	5	5	1.4055	0.147831	28.586	7	10.1	4	4	1.7035	0.231342	5.2084	3
	776	Tb927.11.13510	Tb927.11.13510		hypothetical protein, conserved	20.104	13.9	0	7.1583	1	1	1.48003	0.170271	0.00202436	2.69371	+	13.9	2	2	1.48577	0.171953	5.0276	2	13.9	2	2	1.4147	0.150664	0.067621	2	13.9	2	2	1.5424	0.188197	4.9206	2
	765	Tb927.11.13140	Tb927.11.13140	COXX	cytochrome oxidase subunit X (COXX)	13.672	31	0	25.775	1	1	1.47872	0.169885	0.00659288	2.18092	+	31	4	4	1.42951	0.155187	17.151	7	31	4	4	1.3982	0.145569	6.5887	5	31	4	4	1.6177	0.208898	5.6692	7
	756	Tb927.11.1270	Tb927.11.1270		hypothetical protein, conserved	20.267	40.2	0	55.138	1	1	1.47617	0.169136	0.0059164	2.22794	+	35.5	7	7	1.46752	0.166585	103.11	7	40.2	8	8	1.3751	0.138334	11.974	8	32.5	6	6	1.594	0.202488	65.625	8
	718	Tb927.11.11310	Tb927.11.11310		hypothetical protein, conserved	55.612	4.8	0	6.617	1	1	1.46515	0.165883	0.00523207	2.28133	+	4.8	2	2	1.38995	0.142999	36.046	2	2	1	1	1.4299	0.155306	NaN	1	4.8	2	2	1.5825	0.199344	12.601	2
	1711	Tb927.7.3050	Tb927.7.3050		hypothetical protein, conserved	131.58	37.8	0	323.31	1	1	1.46487	0.165799	0.00485015	2.31424	+	34.8	27	27	1.52574	0.18348	18.803	38	34.2	27	27	1.3581	0.132932	20.686	35	35.5	27	27	1.517	0.180986	17.227	37
	1521	Tb927.5.510	Tb927.5.510		hypothetical protein, conserved	14.154	21.3	0	5.6364	1	1	1.4638	0.165481	0.0010744	2.96884	+	11.8	1	1	1.48586	0.171978	20.727	2	21.3	2	2	1.4938	0.174292	23.056	2	21.3	2	2	1.4131	0.150173	6.4307	2
	500	Tb927.10.3120	Tb927.10.3120		cytochrome c oxidase assembly protein, putative	26.948	28.4	0	57.229	1	1	1.46313	0.165282	0.00196381	2.7069	+	28.4	4	4	1.39768	0.145409	15.536	4	28.4	4	4	1.479	0.169968	12.702	4	20.7	3	3	1.5152	0.18047	19.653	6
	1746	Tb927.7.4050	Tb927.7.4050		hypothetical protein, conserved	85.652	3.4	0	4.8927	1		1.45991	0.164328	0.0260198	1.5847	+	0.9	1	1	1.28695	0.109562	NaN	1	3.4	2	2	1.3917	0.143546	11.166	3	0.9	1	1	1.7373	0.239875	18.39	4
	659	Tb927.10.9440	Tb927.10.9440	54 NDH2	NADH dehydrogenase (54 NDH2)	54.351	55	0	284.97	1		1.45767	0.163658	0.00145018	2.83858	+	55	23	23	1.4015	0.146594	16.41	31	53.2	21	21	1.4731	0.168232	11.035	22	55	23	23	1.5002	0.176149	15.714	26
	1271	Tb927.3.3890	Tb927.3.3890		hypothetical protein, conserved	36.68	3.8	0.0024777	2.8226	1	1	1.45578	0.163097	0.0212043	1.67358	+	3.8	1	1	1.66182	0.220584	NaN	1	3.8	1	1	1.4724	0.168026	NaN	1	3.8	1	1	1.2609	0.100681	NaN	1
	2118	Tb927.9.2450	Tb927.9.2450		electon transport protein SCO1/SCO2, putative	44.135	9.3	0	34.184	1	1	1.45557	0.163033	0.0405609	1.39189	+	5.7	1	1	1.43717	0.157509	NaN	1	9.3	2	2	1.2028	0.0801934	11.614	2	9.3	2	2	1.784	0.251395	32.071	2
	950	Tb927.11.3940	Tb927.11.3940		hypothetical protein, conserved	36.265	7.2	0	8.7245	1	1	1.45433	0.162663	0.000982012	3.00788	+	7.2	2	2	1.449	0.161069	7.0876	2	7.2	2	2	1.4993	0.175889	6.0573	2	7.2	2	2	1.4159	0.151033	6.8182	2
	414	Tb927.10.14840;Tb927.10.14830;Tb927.10.14820	Tb927.10.14840;Tb927.10.14830;Tb927.10.14820	MCP5a	mitochondrial carrier protein (MCP5a) ;mitochondrial carrier protein (MCP5b) ;mitochondrial carrier protein,ADP/ATP translocase 1, putative (MCP5c)	34.074	57.3	0	206.48	3	1	1.45361	0.162449	0.00421509	2.37519	+	56.4	20	20	1.38028	0.139968	21.964	54	55.7	19	19	1.4337	0.156458	15.199	59	57.3	21	21	1.5521	0.19092	14.068	60
	1102	Tb927.11.9450	Tb927.11.9450	PPIase	cyclophilin type peptidyl-prolyl cis-trans isomerase, putative (PPIase)	20.52	23.7	0	40.729	1	1	1.45284	0.162218	0.0172073	1.76429	+	13.7	2	2	1.55579	0.191951	24.479	3	23.7	3	3	1.2602	0.100439	18.017	5	16.8	2	2	1.5641	0.194265	7.9797	2
	696	Tb927.11.10570	Tb927.11.10570		hypothetical protein, conserved	39.513	23.4	0	45.799	1	1	1.45031	0.161462	0.012941	1.88803	+	23.4	7	7	1.29907	0.113633	19.567	7	23.4	7	7	1.4643	0.16563	5.4305	8	23.4	7	7	1.6037	0.205123	6.6716	8
	1854	Tb927.8.1890	Tb927.8.1890		cytochrome c1, heme protein, mitochondrial precursor	30.071	13.2	0	17.202	1	1	1.44996	0.161357	0.00373969	2.42716	+	13.2	3	3	1.4733	0.16829	14.916	5	13.2	3	3	1.3625	0.134337	32.175	5	13.2	3	3	1.5186	0.181443	17.527	5
	817	Tb927.11.15070	Tb927.11.15070		hypothetical protein, conserved	119.15	5.3	0	46.971	1	1	1.44935	0.161174	0.0228641	1.64085	+	4.3	3	3	1.23548	0.0918368	7.6783	3	3.9	3	3	1.6241	0.210613	20.414	3	3.9	3	3	1.5173	0.181071	13.615	3
	1729	Tb927.7.3590	Tb927.7.3590		hypothetical protein, conserved	16.847	6	0	3.8352	1	1	1.44532	0.159965	0.00214928	2.66771	+	6	1	1	1.44911	0.161101	NaN	1	6	1	1	1.5052	0.177594	2.485	2	6	1	1	1.3842	0.141199	18.379	2
	498	Tb927.10.3040	Tb927.10.3040		hypothetical protein, conserved	15.505	25.9	0	10.992	1	1	1.44522	0.159934	0.0249746	1.6025	+	25.9	4	4	1.2196	0.0862179	12.363	7	25.9	4	4	1.5443	0.188732	25.895	6	25.9	4	4	1.6027	0.204852	13.069	5
	1617	Tb927.6.4130	Tb927.6.4130		hypothetical protein, conserved	11.734	64.4	0	54.098	1	1	1.44505	0.159883	0.000882644	3.05421	+	64.4	6	6	1.40119	0.146496	19.155	9	51.9	5	5	1.4636	0.165422	22.746	6	51.9	5	5	1.4714	0.167731	12.419	6
	352	Tb927.10.12540	Tb927.10.12540		electron transfer protein, putative,ferredoxin, putative	33.754	25.1	0	33.497	1	1	1.44058	0.158536	0.0383177	1.4166	+	22.8	4	4	1.18495	0.0736987	41.003	5	19.1	4	4	1.4706	0.167495	16.985	7	19.1	4	4	1.7156	0.234416	26.745	4
	160	Tb927.10.510;Tb11.v5.0374	Tb927.10.510;Tb11.v5.0374		hypothetical protein, conserved ;hypothetical protein, conserved	37.06	24.6	0	27.795	2	1	1.43944	0.158192	0.00270083	2.5685	+	24.6	6	6	1.37233	0.137457	20.118	12	24.6	6	6	1.443	0.159266	12.096	15	24.6	6	6	1.5061	0.177854	12.152	14
	1203	Tb927.3.1410	Tb927.3.1410	COXVII	cytochrome oxidase subunit VII (COXVII)	19.264	42.4	0	19.044	1	1	1.43689	0.157422	0.00793496	2.10046	+	41.2	7	7	1.32123	0.120979	10.759	9	42.4	8	8	1.449	0.161068	12.183	11	34.5	7	7	1.5496	0.19022	20.413	10
	1920	Tb927.8.4470	Tb927.8.4470		chaperone protein DNAj, putative	26.811	5.9	0	4.2201	1		1.43569	0.157059	0.00539983	2.26762	+	5.9	1	1	1.38112	0.140231	NaN	1	5.9	1	1	1.3835	0.140979	NaN	1	5.9	1	1	1.5487	0.189967	NaN	1
	135	Tb927.5.450;Tb11.v5.0222	Tb927.5.450;Tb11.v5.0222	NUBM	NADH-ubiquinone oxidoreductase, mitochondrial, putative (NUBM) ;NADH-ubiquinone oxidoreductase, mitochondrial, putative	55.32	39.3	0	248.62	2		1.43401	0.156553	0.0141186	1.85021	+	34.7	14	14	1.27137	0.104274	20.856	23	39.3	17	17	1.4854	0.171843	32.179	23	38.7	16	16	1.5615	0.193542	14.456	23
	1015	Tb927.11.5990	Tb927.11.5990		hypothetical protein, conserved	69.307	4.1	0	9.5403	1	1	1.43261	0.156129	0.0353471	1.45165	+	1.6	1	1	1.19825	0.0785476	NaN	1	4.1	2	2	1.6999	0.230423	55.403	2	4.1	2	2	1.4435	0.159417	5.5044	2
	193	Tb927.10.380;Tb11.v5.0637	Tb927.10.380;Tb11.v5.0637	PPR5	mitochondrial RNA binding complex 1 subunit (PPR5) ;hypothetical protein, conserved	39.683	4.1	0	3.1202	2	1	1.43073	0.155559	0.00546784	2.26218	+	4.1	1	1	1.32665	0.122755	NaN	1	4.1	1	1	1.485	0.171726	NaN	1	4.1	1	1	1.4866	0.172194	NaN	1
	2107	Tb927.9.1590	Tb927.9.1590		hypothetical protein, conserved	15.734	34.3	0	9.3978	1	1	1.43053	0.155496	0.0339987	1.46854	+	34.3	3	3	1.44753	0.160629	22.723	5	24.3	2	2	1.686	0.226858	58.213	2	25	2	2	1.1995	0.0790003	30.003	3
	1930	Tb927.8.4810	Tb927.8.4810	PHB1	prohibitin 1 (PHB1)	31.429	48.7	0	40.8	1	1	1.4302	0.155398	0.00148203	2.82914	+	37.5	13	13	1.41056	0.149391	19.86	18	44.8	14	14	1.3953	0.144668	15.684	19	48.7	14	14	1.4864	0.172136	80.436	27
	101	Tb927.10.4310;Tb10.v4.0045	Tb927.10.4310;Tb10.v4.0045	PHB2	prohibitin 2, putative (PHB2) ;prohibitin, putative,chrX additional, unordered contigs	32.215	60.7	0	175.51	2	1	1.42755	0.154591	0.000277822	3.55623	+	60.7	12	12	1.40905	0.148925	21.008	15	58	12	12	1.4238	0.153449	6.6642	14	53.2	12	12	1.4501	0.161398	20.999	13
	450	Tb927.10.16090	Tb927.10.16090		hypothetical protein, conserved	89.562	20.3	0	43.41	1		1.42682	0.154369	0.0138248	1.85934	+	13.3	10	1	1.36206	0.134197	12.182	2	20.3	15	1	1.6083	0.206367	13.315	3	18.9	14	1	1.326	0.122544	20.644	3
	1830	Tb927.8.1210	Tb927.8.1210		hypothetical protein, conserved	77.786	12.2	0	4.0831	1		1.42482	0.153761	0.00482182	2.31679	+	12.2	1	1	1.33298	0.124823	77.503	2	12.2	1	1	1.4458	0.160108	8.4973	2	12.2	1	1	1.5009	0.176352	NaN	1
	1853	Tb927.8.1880	Tb927.8.1880		hypothetical protein, conserved	22.189	36.8	0	45.098	1	1	1.42427	0.153592	0.00809381	2.09185	+	25.3	4	4	1.32261	0.121432	28.43	5	36.8	6	6	1.4116	0.149712	8.626	5	31.1	5	5	1.5475	0.189631	11.016	4
	515	Tb927.10.3580	Tb927.10.3580		hypothetical protein, conserved	35.612	23.1	0	30.827	1	1	1.42179	0.152834	0.00471414	2.3266	+	18.2	6	6	1.41373	0.150366	11.429	9	23.1	8	8	1.3436	0.12827	35.711	9	18.2	7	7	1.5131	0.179868	13.444	8
	1127	Tb927.2.2140	Tb927.2.2140		hypothetical protein, conserved	12.703	12	0	3.5763	1	1	1.4204	0.152412	0.0109081	1.96225	+	12	1	1	1.33826	0.12654	NaN	1	12	1	1	1.3572	0.132644	NaN	1	12	1	1	1.5778	0.198052	NaN	1
	1649	Tb927.6.590	Tb927.6.590		hypothetical protein, conserved	12.277	23.5	0.0024814	2.835	1	1	1.41968	0.15219	0.0056793	2.24571	+	23.5	2	2	1.39373	0.144178	4.1104	4	8.2	1	1	1.345	0.128722	NaN	1	23.5	2	2	1.5264	0.183668	12.476	2
	1825	Tb927.7.990	Tb927.7.990		chaperone protein DNAj, putative	86.6	36.8	0	174.99	1		1.41703	0.151379	0.00304461	2.51647	+	34.1	21	21	1.38569	0.141667	22.032	49	33.9	22	22	1.3724	0.137481	14.594	48	30.8	21	21	1.4962	0.17499	11.354	49
	1412	Tb927.8.6970;Tb927.4.5350	Tb927.8.6970;Tb927.4.5350		3-methylcrotonyl-CoA carboxylase alpha subunit, putative ;3-methylcrotonyl-CoA carboxylase, pseudogene, putative,3-methylcrotonyl-CoA carboxylase, point mutation	73.906	2.8	0	7.0295	2	1	1.41642	0.151191	0.0175253	1.75633	+	2.8	1	1	1.44386	0.159524	NaN	1	0	0	0				0	2.8	1	1	1.3895	0.142859	NaN	1
	454	Tb927.10.1660	Tb927.10.1660		hypothetical protein, conserved	33.212	17.3	0	17.793	1	1	1.41636	0.151174	0.00495286	2.30514	+	12.2	4	4	1.3209	0.12087	13.191	5	15.6	5	5	1.4693	0.16711	7.6024	5	13.9	6	6	1.464	0.165541	16.07	9
	1597	Tb927.6.3350	Tb927.6.3350	YCF45	hypothetical protein, conserved (YCF45)	59.527	8.3	0	5.266	1	1	1.41528	0.150842	0.0252609	1.59755	+	5.8	3	3	1.2357	0.0919119	29.735	7	6.2	3	3	1.6362	0.213836	20.306	2	5.8	3	3	1.4021	0.146779	32.018	4
	1284	Tb927.3.4780;Tb927.3.4740	Tb927.3.4780;Tb927.3.4740		hypothetical protein, conserved ;hypothetical protein, conserved	45.763	5.2	0	4.9595	2		1.41516	0.150806	0.0109372	1.96109	+	5.2	2	2	1.36435	0.134926	8.2817	4	5.2	2	2	1.3242	0.121954	8.4653	3	5.2	2	2	1.5687	0.19554	20.365	4
	1548	Tb927.6.1550	Tb927.6.1550		leucine-rich repeat protein (LRRP), putative	38.864	8.2	0	6.9203	1		1.41416	0.150499	0.00203996	2.69038	+	8.2	3	3	1.37639	0.13874	12.896	3	8.2	3	3	1.3904	0.14314	4.4937	3	8.2	3	3	1.4778	0.169616	4.7545	3
	303	Tb927.10.10780	Tb927.10.10780		hypothetical protein, conserved	23.3	4.7	0	3.6484	1	1	1.41361	0.150329	0.00628264	2.20186	+	4.7	1	1	1.40398	0.147361	NaN	1	4.7	1	1	1.4233	0.153296	35.75	2	0	0	0				0
	1613	Tb927.6.4070	Tb927.6.4070		hypothetical protein, conserved	29.319	38.7	0	213.56	1	1	1.41163	0.14972	0.00555106	2.25562	+	38.7	8	8	1.3347	0.125385	8.0698	10	38.7	8	8	1.3936	0.144138	21.609	12	38.7	8	8	1.5123	0.179638	20.77	14
	108	Tb11.02.5105b;Tb11.02.5105	Tb11.02.5105b;Tb11.02.5105		hypothetical protein, conserved ;hypothetical protein, conserved	14.971	39.2	0	48.869	2	1	1.40759	0.148475	0.00284838	2.5454	+	39.2	8	8	1.41109	0.149556	13.679	15	39.2	7	7	1.3442	0.128464	19.336	11	39.2	8	8	1.4703	0.167406	32.275	12
	609	Tb927.10.760	Tb927.10.760		hypothetical protein, conserved	29.887	5.5	0	5.313	1	1	1.4075	0.148448	0.0135437	1.86826	+	5.5	1	1	1.40325	0.147136	NaN	1	5.5	1	1	1.2762	0.105919	NaN	1	5.5	1	1	1.557	0.192289	NaN	1
	633	Tb927.10.8220	Tb927.10.8220		hypothetical protein, conserved	18.995	7.5	0	5.9293	1	1	1.40468	0.147576	0.0114703	1.94042	+	7.5	1	1	1.5597	0.19304	NaN	1	7.5	1	1	1.3289	0.123492	NaN	1	7.5	1	1	1.3372	0.126196	5.3909	2
	1504	Tb927.5.3700	Tb927.5.3700		hypothetical protein, conserved	32.239	20.2	0	8.0488	1	1	1.40385	0.147319	0.012306	1.90988	+	20.2	4	4	1.34414	0.128445	22.564	5	20.2	4	4	1.3164	0.119388	9.9208	4	20.2	4	4	1.5636	0.194126	6.8571	5
	692	Tb927.11.10400	Tb927.11.10400		hypothetical protein, conserved	21.238	23.5	0	11.625	1	1	1.4034	0.147182	0.00846481	2.07238	+	10.1	2	2	1.45879	0.163993	7.8591	3	23.5	4	4	1.2838	0.108497	6.1646	4	23.5	4	4	1.4759	0.169057	12.055	4
	641	Tb927.10.8730	Tb927.10.8730		hypothetical protein, conserved	50.876	29.6	0	167.71	1	1	1.39948	0.145966	0.00146719	2.83351	+	29.6	10	10	1.34953	0.130182	25.384	12	26	8	8	1.4211	0.152625	14.042	10	29.6	10	10	1.4292	0.155093	18.714	11
	530	Tb927.10.4280	Tb927.10.4280		hypothetical protein, conserved	24.055	16.4	0	9.2669	1	1	1.39837	0.145621	0.0281319	1.5508	+	16.4	3	3	1.63092	0.212433	6.3628	3	12.4	2	2	1.2263	0.0885967	2.8573	2	16.4	3	3	1.3672	0.135832	16.247	3
	1219	Tb927.3.1940	Tb927.3.1940		hypothetical protein, conserved	49.435	10.5	0	49.224	1	1	1.39573	0.144802	0.00587297	2.23114	+	10.5	4	4	1.2983	0.113374	12.513	4	10.5	4	4	1.436	0.157154	15.298	5	8.7	3	3	1.4584	0.163877	13.996	4
	233	Tb927.1.1580	Tb927.1.1580		cytochrome c oxidase assembly factor, putative,electron transport protein SCO1/2, putative	33.578	6.3	0	3.5235	1	1	1.39442	0.144394	0.0173771	1.76002	+	2.7	1	1	1.26703	0.102785	NaN	1	2.7	1	1	1.3604	0.133667	NaN	1	6.3	2	2	1.573	0.196729	NaN	1
	2079	Tb927.9.1380	Tb927.9.1380		hypothetical protein, conserved	42.439	15	0	12.48	1	1	1.39182	0.143584	0.0237671	1.62402	+	12.9	4	4	1.3083	0.116708	18.256	5	12.1	4	4	1.2759	0.105817	36.464	3	12.9	4	4	1.6152	0.208226	13.052	4
	423	Tb927.10.15080	Tb927.10.15080		hypothetical protein, conserved	180.2	3.1	0	17.944	1		1.38909	0.142731	0.0123422	1.90861	+	2.4	3	3	1.26247	0.10122	36.085	3	2.4	3	3	1.5137	0.18004	11.537	3	2.6	3	3	1.4026	0.146934	8.5615	3
	1341	Tb927.4.1660	Tb927.4.1660	MCP6	mitochondrial carrier protein, putative (MCP6)	42.163	9.4	0	6.6978	1	1	1.3822	0.140572	0.026342	1.57935	+	7	2	2	1.36008	0.133565	29.343	2	9.4	3	3	1.5921	0.20197	32.619	5	9.4	3	3	1.2195	0.0861818	36.594	3
	118	Tb11.1420;Tb11.1370;Tb927.11.1850	Tb11.1420;Tb11.1370;Tb927.11.1850		hypothetical protein,chrXI additional, unordered contigs ;hypothetical protein, conserved ;hypothetical protein, conserved	50.917	39.5	0	128.68	3	1	1.38034	0.139987	0.00396508	2.40175	+	33	12	12	1.32321	0.121628	14.143	23	39.5	15	15	1.3626	0.134368	43.049	37	39.5	15	15	1.4587	0.163966	38.309	36
	2042	Tb927.9.11660	Tb927.9.11660		hypothetical protein, conserved	26.647	15.5	0	4.9714	1	1	1.38005	0.139895	0.00110986	2.95473	+	11.5	1	1				0	4	1	1	1.3785	0.139407	NaN	1	4	1	1	1.3816	0.140382	NaN	1
	854	Tb927.11.16510	Tb927.11.16510		hypothetical protein, conserved	16.327	18.5	0	34.094	1	1	1.37813	0.13929	0.00248988	2.60382	+	18.5	2	2	1.41271	0.150053	60.033	3	18.5	2	2	1.317	0.119586	15.031	3	18.5	2	2	1.4068	0.148232	18.046	3
	1791	Tb927.7.6350	Tb927.7.6350		NADH-ubiquinone oxidoreductase, mitochondrial, putative	30.925	35.5	0	44.12	1	1	1.37622	0.138688	0.0109581	1.96027	+	35.5	9	9	1.25986	0.100322	17.473	15	30.8	8	8	1.3919	0.143608	9.3205	11	31.9	8	8	1.4864	0.172136	15.373	15
	969	Tb927.11.4490	Tb927.11.4490		long-chain-fatty-acid-CoA ligase, putative,acyl-CoA synthetase, putative,fatty acid thiokinase (long chain), putative	73.435	12.5	0	47.308	1	1	1.37528	0.13839	0.011071	1.95581	+	10.5	5	5	1.31218	0.117994	25.461	5	8.4	4	4	1.3089	0.116906	16.607	9	9.5	4	4	1.5145	0.180269	16.716	5
	1735	Tb927.7.3890	Tb927.7.3890		hypothetical protein, conserved	33.666	5.2	0	43.033	1	1	1.37045	0.136863	0.0075674	2.12105	+	5.2	1	1	1.47612	0.169123	NaN	1	5.2	1	1	1.292	0.111263	NaN	1	5.2	1	1	1.3496	0.130205	0.038489	2
	1343	Tb927.4.1760	Tb927.4.1760		hypothetical protein, conserved	17.442	38.2	0	64.078	1	1	1.36982	0.136664	0.0110332	1.9573	+	38.2	4	4	1.28728	0.109674	6.526	6	38.2	4	4	1.3277	0.1231	7.4205	6	26.8	3	3	1.5039	0.177219	5.7053	3
	1983	Tb927.8.6580	Tb927.8.6580		succinate dehydrogenase flavoprotein, putative	66.88	17.2	0	76.669	1	1	1.36829	0.136178	0.0284322	1.54619	+	13.5	6	6	1.18412	0.0733952	34.767	8	17.2	8	8	1.3971	0.145227	31.131	11	15.8	7	7	1.5485	0.189911	15.496	11
	1748	Tb927.7.4140	Tb927.7.4140		hypothetical protein, conserved	20.852	28.2	0	13.359	1	1	1.36705	0.135783	0.00717865	2.14396	+	18.6	3	3	1.47208	0.167932	6.3454	3	28.2	4	4	1.2992	0.113676	1.0151	2	12.8	2	2	1.3358	0.125741	12.233	3
	1265	Tb927.3.3660	Tb927.3.3660		hypothetical protein, conserved	29.594	22	0	10.864	1	1	1.36389	0.134781	0.0293233	1.53279	+	22	5	5	1.31626	0.119341	37.551	5	18.9	4	4	1.2158	0.0848621	13.791	4	22	5	5	1.5854	0.200139	31.969	5
	1953	Tb927.8.5640	Tb927.8.5640		hypothetical protein, conserved	37.089	21	0	50.982	1	1	1.36262	0.134376	0.0203609	1.6912	+	17.7	4	4	1.53804	0.186966	26.13	4	15	4	4	1.2346	0.0915263	48.385	3	17.4	4	4	1.3324	0.124635	25.588	3
	1113	Tb927.11.9750	Tb927.11.9750		hypothetical protein, conserved	72.849	14.3	0	34.21	1		1.36077	0.133784	0.0141972	1.8478	+	14.3	8	8	1.37752	0.139099	9.9597	6	14.3	7	7	1.2345	0.0914911	10.752	7	14.3	7	7	1.4817	0.17076	10.739	7
	907	Tb927.11.2650	Tb927.11.2650		heat shock protein 84, putative	84.2	30.5	0	198.92	1		1.36038	0.133661	0.00746014	2.12725	+	30.1	19	19	1.29732	0.113047	29.802	32	30.3	21	21	1.3232	0.121625	35.325	41	30	20	20	1.4666	0.166312	37.939	38
	1719	Tb927.7.330	Tb927.7.330		hypothetical protein	21.139	7.3	0	6.7967	1		1.35554	0.132111	0.0478814	1.31983	+	7.3	1	1	1.57624	0.197623	NaN	1	7.3	1	1	1.1173	0.0481698	NaN	1	7.3	1	1	1.4143	0.150542	11.537	2
	1807	Tb927.7.7010	Tb927.7.7010		hypothetical protein, conserved	18.121	31.2	0	25.885	1	1	1.35554	0.132111	0.00337229	2.47208	+	31.2	4	4	1.29767	0.113165	9.5563	4	31.2	4	4	1.3559	0.132228	11.309	4	31.2	4	4	1.4156	0.150941	9.1636	4
	1016	Tb927.11.600	Tb927.11.600		hypothetical protein, conserved	12.081	61.3	0	60.155	1	1	1.35325	0.131377	0.00194418	2.71126	+	61.3	6	6	1.35329	0.131391	16.117	11	61.3	6	6	1.3096	0.117139	17.272	12	61.3	6	6	1.3983	0.1456	17.906	9
	1365	Tb927.4.2660	Tb927.4.2660		hypothetical protein, conserved	10.307	32.6	0	8.7532	1	1	1.35234	0.131086	0.00347196	2.45943	+	30.3	4	4	1.28991	0.110558	21.085	7	32.6	4	4	1.3633	0.134591	15.136	4	21.3	3	3	1.4064	0.148109	16.945	4
	1134	Tb927.2.2470	Tb927.2.2470	KREPA1	RNA-editing complex protein,KREPA1 (KREPA1)	81.293	2.6	0	16.765	1	1	1.35143	0.130793	0.023233	1.63389	+	2.6	1	1	1.53936	0.187341	43.419	2	2.6	1	1	1.3041	0.115311	3.6225	2	2.6	1	1	1.2295	0.0897285	23.646	3
	612	Tb927.10.770	Tb927.10.770		hypothetical protein, conserved	69.121	27.7	0	153.17	1	1	1.35055	0.13051	0.0160353	1.79492	+	23.4	13	13	1.2809	0.107516	27.777	15	24.8	13	13	1.2753	0.105612	8.7689	10	25	13	13	1.508	0.178401	18.532	16
	919	Tb927.11.2990	Tb927.11.2990	KREPB4	KREPB4 (KREPB4)	46.39	9.2	0	49.261	1	1	1.35042	0.130468	0.00386705	2.41262	+	5.3	2	2	1.31334	0.118376	NaN	1	7.2	2	2	1.4241	0.15354	6.8847	2	7.2	2	2	1.3167	0.119487	NaN	1
	814	Tb927.11.14980	Tb927.11.14980		hypothetical protein, conserved	58.419	5.5	0	26.811	1	1	1.34847	0.129841	0.0367488	1.43476	+	5.5	2	2	1.17957	0.071722	8.5192	4	5.5	2	2	1.3135	0.11843	18.984	3	5.5	2	2	1.5826	0.199371	1.2155	2
	1477	Tb927.5.2790	Tb927.5.2790	Pol beta-PAK	mitochondrial DNA polymerase beta-PAK (Pol beta-PAK)	87.228	5.3	0	13.815	1	1	1.34845	0.129836	0.0444242	1.35238	+	3	2	2	1.24296	0.0944578	26.784	3	3.9	2	2	1.2091	0.0824622	54.013	2	3.9	2	2	1.6315	0.212587	37.339	2
	1659	Tb927.6.920	Tb927.6.920		helicase, putative	107.47	4.1	0	7.5066	1	1	1.3461	0.129077	0.027664	1.55809	+	4.1	3	3	1.43532	0.156948	28.451	3	4.1	3	3	1.1637	0.065841	48.294	3	2.9	2	2	1.4603	0.164442	35.012	2
	1519	Tb927.5.4330	Tb927.5.4330		dihydrolipoamide branched chain transacylase, putative	47.651	9.3	0	19.488	1	1	1.34282	0.128017	0.00163868	2.78551	+	9.3	3	3	1.369	0.136404	31.647	4	9.3	3	3	1.3623	0.134273	13.253	3	9.3	3	3	1.2983	0.113375	11.442	4
	1965	Tb927.8.6040	Tb927.8.6040		hypothetical protein, conserved	26.898	8.4	0.0029397	2.6848	1	1	1.34035	0.127218	0.049628	1.30427	+	3.8	1	1	1.12477	0.051064	NaN	1	3.8	1	1	1.5896	0.201288	NaN	1	8.4	2	2	1.3468	0.129303	12.43	2
	801	Tb927.11.14380	Tb927.11.14380		kinetoplast polyadenylation/uridylation factor 2	72.496	6.1	0	26.949	1	1	1.34014	0.12715	0.0486804	1.31265	+	6.1	3	3	1.15766	0.0635818	22.701	6	6.1	3	3	1.2856	0.109106	34.807	4	3.4	2	2	1.6172	0.208764	35.969	5
	1814	Tb927.7.7430;Tb927.7.7420	Tb927.7.7430;Tb927.7.7420		ATP synthase alpha chain, mitochondrial precursor,ATP synthase F1, alpha subunit ;ATP synthase alpha chain, mitochondrial precursor,ATP synthase F1, alpha subunit	63.502	39.7	0	204.18	2	1	1.33809	0.126486	0.018398	1.73523	+	36.6	22	22	1.21448	0.0843891	20.549	42	38	22	22	1.3314	0.124309	23.198	49	36.6	22	22	1.4817	0.17076	34.959	49
	1702	Tb927.7.2710	Tb927.7.2710		NADH-cytochrome b5 reductase, putative	31.885	26.8	0	90.857	1	1	1.33762	0.126331	0.000709667	3.14895	+	26.8	6	6	1.33613	0.125849	13.024	6	22.3	5	5	1.364	0.134814	10.343	6	23	5	5	1.3132	0.118331	8.1703	6
	529	Tb927.10.4240	Tb927.10.4240		hypothetical protein, conserved	14.753	40	0	35.562	1	1	1.33399	0.125154	0.00140128	2.85348	+	36.7	5	5	1.32742	0.123009	25.72	11	40	7	7	1.3028	0.114878	19.218	7	40	6	6	1.3727	0.137576	8.7082	6
	1513	Tb927.5.4080	Tb927.5.4080		hypothetical protein, conserved	58.167	3.4	0.0060861	2.2117	1	1	1.33327	0.124917	0.0349942	1.456	+	3.4	1	1	1.14088	0.0572382	10.563	2	3.4	1	1	1.4914	0.173594	9.3578	2	3.4	1	1	1.3929	0.14392	NaN	1
	107	Tb11.02.5070b;Tb927.11.7212	Tb11.02.5070b;Tb927.11.7212		hypothetical protein, conserved ;hypothetical protein, conserved	32.082	22.7	0	43.79	2	1	1.32904	0.123538	0.0223498	1.65073	+	22.7	7	7	1.29079	0.110855	16.129	8	22.7	7	7	1.2144	0.0843618	14.191	7	22.7	7	7	1.4976	0.175396	36.636	9
	1049	Tb927.11.6850	Tb927.11.6850		hypothetical protein, conserved	26.513	10	0	5.3963	1	1	1.32287	0.121517	0.0331978	1.47889	+	7.1	2	2	1.14406	0.0584488	20.99	2	10	3	3	1.3688	0.13634	7.2348	3	10	3	3	1.4783	0.169763	31.267	4
	316	Tb927.10.11350	Tb927.10.11350		hypothetical protein, conserved	16.667	6.8	0.0043228	2.4567	1	1	1.32098	0.120896	0.0475834	1.32254	+	6.8	1	1	1.48357	0.171308	NaN	1	6.8	1	1	1.1	0.0413927	NaN	1	6.8	1	1	1.4125	0.149988	NaN	1
	1202	Tb927.3.1380	Tb927.3.1380		ATP synthase beta chain, mitochondrial precursor,ATP synthase F1, beta subunit	55.775	67.8	0	323.31	1	1	1.32085	0.120855	0.013207	1.8792	+	66.7	24	24	1.22021	0.0864351	31.894	59	63.8	23	23	1.3191	0.120278	22.472	58	65.7	24	24	1.4317	0.155852	19.805	64
	2173	Tb927.9.6450	Tb927.9.6450		hypothetical protein, conserved	50.126	6	0	3.7421	1		1.31945	0.120392	0.0275475	1.55992	+	6	3	3	1.15201	0.0614553	4.9257	3	6	3	3	1.4055	0.147831	28.629	3	6	3	3	1.4187	0.151891	24.377	3
	1379	Tb927.4.3450	Tb927.4.3450		hypothetical protein, conserved	13.735	29.8	0	23.432	1	1	1.31839	0.120044	0.0334297	1.47587	+	29.8	2	2	1.27021	0.103876	30.758	5	29.8	2	2	1.1837	0.0732416	3.0824	5	29.8	2	2	1.5241	0.183013	27.124	5
	223	Tb927.4.3020;Tb11.v5.0965	Tb927.4.3020;Tb11.v5.0965		ATP-dependent DEAH-box RNA helicase, putative ;ATP-dependent DEAH-box RNA helicase, putative	159.21	3.1	0	19.225	2	1	1.31606	0.119277	0.0313835	1.5033	+	1.6	2	2	1.13924	0.0566143	54.893	3	3.1	4	4	1.4244	0.153632	30.809	3	1.5	2	2	1.4047	0.147584	11.193	2
	1403	Tb927.4.4630	Tb927.4.4630		hypothetical protein, conserved	18.467	13.9	0	7.9863	1	1	1.31156	0.117788	0.0318125	1.4974	+	13.9	2	2	1.41756	0.15154	19.748	3	13.9	2	2	1.4009	0.146407	11.687	3	13.9	2	2	1.1361	0.0554166	20.701	3
	676	Tb927.10.9970	Tb927.10.9970		hypothetical protein, conserved	110	15.4	0	136.92	1	1	1.31142	0.117742	0.0215126	1.66731	+	15.4	13	13	1.20211	0.0799445	15.827	17	15.4	13	13	1.2813	0.107651	14.639	18	14.6	12	12	1.4643	0.16563	18.534	15
	976	Tb927.11.4690	Tb927.11.4690	POLIB	mitochondrial DNA polymerase I protein B (POLIB)	158.71	0.8	0	21.616	1	1	1.31015	0.11732	0.0416801	1.38007	+	0.8	1	1	1.34194	0.127733	NaN	1	0.8	1	1	1.1223	0.050109	NaN	1	0.8	1	1	1.4932	0.174118	NaN	1
	1106	Tb927.11.9560	Tb927.11.9560		oxidoreductase, putative	58.621	9	0	38.933	1	1	1.30947	0.117094	0.0136354	1.86533	+	7.4	3	3	1.1957	0.0776223	6.1284	4	9	4	4	1.3732	0.137734	11.045	5	7.4	3	3	1.3675	0.135927	27.678	3
	471	Tb927.10.2070	Tb927.10.2070		hypothetical protein, conserved	22.271	4.5	0.0043062	2.4328	1	1	1.30722	0.11635	0.00163712	2.78592	+	4.5	1	1	1.31309	0.118296	5.6767	2	4.5	1	1	1.2704	0.10394	NaN	1	4.5	1	1	1.3391	0.126813	NaN	1
	2171	Tb927.9.6410	Tb927.9.6410		hypothetical protein, conserved	75.105	7.3	0	28.003	1	1	1.30629	0.116039	0.0328707	1.48319	+	5.8	2	2	1.16728	0.0671763	0.21165	2	7.3	3	3	1.4942	0.174409	21.409	3	5.8	2	2	1.278	0.106531	5.9533	2
	1101	Tb927.11.940	Tb927.11.940	KREPB5	KREPB5 (KREPB5)	43.464	2.6	0	6.336	1	1	1.30551	0.115779	0.000991599	3.00366	+	2.6	1	1	1.32897	0.123517	NaN	1	2.6	1	1	1.3117	0.117835	NaN	1	2.6	1	1	1.2764	0.105987	NaN	1
	1080	Tb927.11.8290	Tb927.11.8290		exosome complex exonuclease RRP44, putative	101.68	3.1	0	7.4235	1		1.29834	0.11339	0.0155285	1.80887	+	1.8	1	1	1.2206	0.0865729	NaN	1	3.1	2	2	1.259	0.100026	20.748	2	3.1	2	2	1.4242	0.153571	30.685	2
	599	Tb927.10.7290	Tb927.10.7290		hypothetical protein, conserved	129.88	2.7	0	7.4597	1		1.29734	0.113054	0.026331	1.57953	+	2.7	2	2	1.19004	0.0755605	22.822	2	1	1	1	1.4639	0.165511	7.6207	2	1	1	1	1.2534	0.0980897	11.473	2
	1430	Tb927.5.1130	Tb927.5.1130		hypothetical protein, conserved	34.299	12.5	0	21.955	1	1	1.29577	0.112528	0.00103588	2.98469	+	12.5	3	3	1.27105	0.104163	1.4414	3	12.5	3	3	1.3239	0.121855	10.946	3	12.5	3	3	1.2929	0.111565	42.505	3
	1446	Tb927.5.1710	Tb927.5.1710		ribonucleoprotein p18, mitochondrial precursor, putative	21.226	19.7	0	92.977	1	1	1.29559	0.112468	0.0463708	1.33376	+	19.7	4	4	1.10908	0.044962	22.795	6	19.7	4	4	1.3199	0.120541	11.561	7	19.7	3	3	1.4856	0.171902	24.651	5
	1371	Tb927.4.3070	Tb927.4.3070		hypothetical protein, conserved	51.431	33.9	0	47.876	1	1	1.2953	0.112369	0.00966026	2.01501	+	31	11	11	1.32312	0.121599	12.87	11	31	12	12	1.2064	0.0814913	18.737	12	33.9	13	13	1.3615	0.134018	21.88	13
	1487	Tb927.5.3140	Tb927.5.3140		hypothetical protein, conserved	25.738	9.7	0	3.8528	1		1.29289	0.11156	0.036427	1.43858	+	9.7	2	2	1.35038	0.130457	17.132	2	9.7	2	2	1.1204	0.0493731	7.3618	3	9.7	2	2	1.4284	0.15485	28.425	3
	1932	Tb927.8.4920	Tb927.8.4920		hypothetical protein, conserved	58.293	9.8	0	11.604	1	1	1.29138	0.111055	0.00400742	2.39713	+	9.8	4	4	1.33529	0.125576	11.189	5	9.8	4	4	1.2356	0.0918779	15.532	6	9.8	4	4	1.3053	0.11571	3.6331	4
	1537	Tb927.5.960;Tb927.3.3280	Tb927.5.960		hypothetical protein, conserved	37.159	18.5	0	22.276	2		1.29107	0.11095	0.022984	1.63857	+	18.5	5	5	1.15307	0.0618557	11.562	4	18.5	5	5	1.3542	0.131683	13.453	5	18.5	5	5	1.3782	0.139312	14.297	4
	622	Tb927.10.8030	Tb927.10.8030		hypothetical protein, conserved	28.834	53.7	0	118.47	1	1	1.29009	0.110622	0.0139768	1.85459	+	49.8	12	12	1.2528	0.0978828	11.509	17	53.7	13	13	1.2195	0.0861818	13.43	17	43.9	11	11	1.4054	0.1478	20.27	17
	255	Tb927.1.3010	Tb927.1.3010		mRNA processing protein, putative	40.813	15.9	0	22.306	1	1	1.28988	0.110548	0.0457924	1.33921	+	12.1	3	3	1.17273	0.0691986	12.578	3	15.9	4	4	1.2029	0.0802295	6.4762	4	9.4	2	2	1.5213	0.182215	35.502	2
	859	Tb927.11.16660	Tb927.11.16660		hypothetical protein, conserved	234.41	1.9	0	14.916	1		1.28601	0.109243	0.0210037	1.6777	+	1.9	3	3	1.26386	0.101697	6.9974	2	1	2	2	1.4208	0.152533	32.49	2	1.9	3	3	1.1844	0.0734984	9.4424	3
	1048	Tb927.11.6830	Tb927.11.6830		hypothetical protein, conserved	108.83	7.8	0	64.045	1	1	1.2859	0.109207	0.0469635	1.32824	+	5.4	4	4	1.18388	0.0733078	9.4937	4	7.8	6	6	1.183	0.0729847	29.894	4	4	3	3	1.5182	0.181329	20.423	2
	524	Tb927.10.4080	Tb927.10.4080		hypothetical protein, conserved	127.1	21.8	0	106.95	1	1	1.28424	0.108646	0.0115592	1.93707	+	20.7	10	10	1.19154	0.0761087	20.29	14	21.8	11	11	1.3109	0.11757	16.618	15	21.8	11	11	1.356	0.13226	28.655	14
	1531	Tb927.5.770	Tb927.5.770		hypothetical protein, conserved	76.378	16.9	0	91.918	1	1	1.27989	0.107174	0.0442693	1.3539	+	16.9	7	7	1.44888	0.161031	22.561	14	16.9	7	7	1.1059	0.0437159	14.613	14	16.9	7	7	1.3085	0.116774	15.113	12
	1469	Tb927.5.2560	Tb927.5.2560		hypothetical protein, conserved	8.7229	30.1	0	46.087	1	1	1.27623	0.105927	0.0148281	1.82891	+	30.1	2	2	1.38924	0.142776	8.0109	3	30.1	2	2	1.2089	0.0823904	6.3854	4	30.1	2	2	1.2377	0.0926154	12.627	3
	571	Tb927.10.600	Tb927.10.600		hypothetical protein, conserved	62.775	14.6	0	58.133	1	1	1.27431	0.105274	0.0234144	1.63052	+	11.5	4	4	1.41417	0.150501	8.6792	4	14.6	5	5	1.1772	0.0708503	20.675	5	12.4	4	4	1.243	0.0944711	22.815	4
	906	Tb927.11.2640	Tb927.11.2640	TbNST	ras-like small GTPase, putative (TbNST)	53.387	4.5	0.0029455	2.6981	1		1.27428	0.105264	0.0140583	1.85207	+	2.7	1	1				0	1.9	1	1	1.288	0.109916	NaN	1	1.9	1	1	1.2607	0.100612	NaN	1
	377	Tb927.10.13600	Tb927.10.13600		hypothetical protein, conserved,hypothetical protein	18.522	34.2	0	83.041	1	1	1.27365	0.105052	0.025192	1.59874	+	34.2	6	6	1.24418	0.0948844	9.6425	7	20.9	5	5	1.1711	0.068594	7.9622	6	20.9	5	5	1.418	0.151676	12.461	6
	1827	Tb927.8.1080	Tb927.8.1080		centrin, putative,caltractin, putative	21.791	8.7	0	18.801	1		1.27274	0.104741	0.0173479	1.76075	+	8.7	1	1	1.25611	0.0990269	NaN	1	8.7	1	1	1.2896	0.110455	NaN	1	0	0	0				0
	417	Tb927.10.14920	Tb927.10.14920		hypothetical protein, conserved	136.21	1.6	0.0056684	2.3258	1	1	1.27187	0.104443	0.0499863	1.30115	+	0.7	1	1	1.38602	0.14177	NaN	1	1.6	2	2	1.376	0.138618	23.528	3	0.9	1	1	1.0788	0.0329409	NaN	1
	694	Tb927.11.10510	Tb927.11.10510		ubiquinone biosynthesis methyltransferase, putative	32.094	13.5	0	16.728	1	1	1.27151	0.104321	0.0194427	1.71124	+	13.5	3	3	1.16248	0.0653854	16.57	2	9.4	2	2	1.375	0.138303	5.6696	2	8	2	2	1.2861	0.109275	NaN	1
	286	Tb927.1.840	Tb927.1.840		hypothetical protein, conserved	27.104	15.9	0	6.1886	1	1	1.27008	0.103832	0.0116226	1.9347	+	15.9	3	3	1.36344	0.134635	9.2929	5	15.9	3	3	1.2029	0.0802295	14.141	6	15.9	3	3	1.2492	0.096632	12.639	5
	95	Tb08.27P2.210	Tb08.27P2.210		variant surface glycoprotein (VSG, pseudogene), putative,variant surface glycoprotein, degenerate,BAC from homologous region on chr8	50.249	3.4	0.0069832	2.165	1		1.26874	0.103372	0.00508961	2.29332	+	3.4	1	1	1.32545	0.122364	NaN	1	3.4	1	1	1.2638	0.101678	0	2	3.4	1	1	1.2192	0.086075	4.1925	3
	980	Tb927.11.4870	Tb927.11.4870		hypothetical protein, conserved	25.784	24.1	0	30.75	1	1	1.26836	0.103243	0.0340151	1.46833	+	24.1	4	4	1.23816	0.0927768	20.586	4	15.5	3	3	1.1485	0.060131	6.3638	3	15.5	3	3	1.4349	0.156822	2.9599	3
	582	Tb927.10.6510;Tb927.10.6400	Tb927.10.6510;Tb927.10.6400	HSP60	chaperonin HSP60, mitochondrial precursor (HSP60) ;chaperonin HSP60, mitochondrial precursor (HSP60)	59.503	78.1	0	323.31	2		1.26731	0.102884	0.0109373	1.96109	+	74.9	44	43	1.19679	0.0780172	14.711	229	76.7	46	45	1.2571	0.0993698	35.147	233	77.4	47	46	1.3529	0.131266	37.168	276
	399	Tb927.10.14350	Tb927.10.14350		hypothetical protein, conserved	10.907	9.3	0.003423	2.665	1	1	1.26547	0.102252	0.0238084	1.62327	+	9.3	1	1	1.21737	0.0854242	NaN	1	9.3	1	1	1.1839	0.073315	NaN	1	9.3	1	1	1.4061	0.148016	NaN	1
	611	Tb927.10.7620	Tb927.10.7620		mitochondrial ATP-dependent zinc metallopeptidase, putative,metallo-peptidase, Clan MA(E) Family M41	71.088	7.3	0	84.337	1	1	1.26486	0.102043	0.037664	1.42407	+	7.3	3	3	1.38272	0.140736	43.098	4	5.6	3	3	1.1057	0.0436373	11.959	5	5.6	2	2	1.3236	0.121757	21.285	4
	2226	Tb927.9.9810	Tb927.9.9810		hypothetical protein, conserved	16.882	13.2	0	13.543	1		1.26452	0.101926	0.0242267	1.61571	+	13.2	2	2	1.2854	0.109037	NaN	1	13.2	2	2	1.3748	0.13824	20.357	3	5.3	1	1	1.1442	0.0585019	NaN	1
	928	Tb927.11.3260	Tb927.11.3260	POLID	mitochondrial DNA polymerase I protein D, putative (POLID)	182.88	7.4	0	76.878	1	1	1.26367	0.101633	0.0319863	1.49504	+	6.6	10	10	1.36231	0.134274	13.513	11	7.4	11	11	1.1169	0.0480143	27.442	12	5.1	8	8	1.3262	0.122609	12.689	11
	514	Tb927.10.3570;Tb11.v5.1042	Tb927.10.3570	KREX2	KREX2 (KREX2)	99.416	14.6	0	71.356	2	1	1.26146	0.100874	0.0104672	1.98017	+	12.7	9	9	1.18468	0.073601	11.69	6	12.9	10	10	1.2718	0.104419	11.837	10	12.3	9	9	1.3323	0.124602	20.86	9
	1679	Tb927.7.210	Tb927.7.210		proline dehydrogenase	63.858	48.6	0	323.31	1	1	1.25648	0.0991548	0.0137936	1.86032	+	46.6	24	24	1.19936	0.0789485	12.443	63	43.9	24	24	1.2189	0.0859681	14.761	73	42.6	24	24	1.3569	0.132548	28.114	68
	1565	Tb927.6.2140	Tb927.6.2140		hypothetical protein, conserved	28.771	26.2	0	26.056	1	1	1.25416	0.0983518	0.00807696	2.09275	+	26.2	5	5	1.20359	0.0804774	29.333	4	12.4	2	2	1.2353	0.0917724	4.9124	2	16.5	3	3	1.3268	0.122805	45.232	3
	648	Tb927.10.9000	Tb927.10.9000		hypothetical protein, conserved	181.55	5.9	0	30.848	1	1	1.254	0.0982971	0.0074121	2.13006	+	4.3	6	5	1.1892	0.0752556	18.912	5	5.9	8	7	1.3069	0.116242	26.799	9	4.2	6	5	1.2688	0.103393	16.152	5
	1575	Tb927.6.2420	Tb927.6.2420		p22 protein precursor	25.349	35.2	0	104.54	1	1	1.25209	0.0976349	0.0139188	1.8564	+	34.8	6	6	1.22743	0.088997	10.784	8	35.2	8	8	1.1861	0.0741213	15.593	11	34.8	6	6	1.3483	0.129787	9.8406	10
	668	Tb927.10.9830	Tb927.10.9830		hypothetical protein, conserved	17.194	56.7	0	79.604	1	1	1.25143	0.0974058	0.00453574	2.34335	+	56.7	7	7	1.20812	0.0821113	17.547	10	56.7	7	7	1.2467	0.095762	22.291	11	43.3	5	5	1.3012	0.114344	40.462	8
	528	Tb927.10.4220	Tb927.10.4220		hypothetical protein, conserved	34.243	14.2	0	14.166	1	1	1.25039	0.097044	0.0348919	1.45728	+	6.8	2	2	1.2022	0.0799759	4.7584	2	14.2	4	4	1.151	0.0610753	8.044	4	6.8	2	2	1.4128	0.150081	1.9147	2
	1025	Tb927.11.6250	Tb927.11.6250		hypothetical protein, conserved	27.599	39.8	0	224.62	1	1	1.24953	0.096748	0.0129037	1.88929	+	36.4	8	8	1.2493	0.0966658	34.996	11	39.8	9	9	1.1731	0.069335	6.1403	12	36.4	8	8	1.3312	0.124243	10.455	14
	153	Tb11.v5.0325;Tb11.v5.0442;Tb11.1800	Tb11.v5.0325		retrotransposon hot spot (RHS) protein, putative	36.986	22.5	0	16.407	3	1	1.24914	0.0966113	0.00089796	3.04674	+	22.5	6	2	1.26425	0.101834	25.865	4	16.6	5	2	1.2261	0.0885259	4.1447	3	22.5	6	2	1.2574	0.0994735	11.884	4
	1743	Tb927.7.3990	Tb927.7.3990	TbPOL1C	mitochondrial DNA polymerase I protein C (TbPOL1C)	182.03	5.5	0	23.706	1	1	1.2479	0.0961801	0.0356737	1.44765	+	5	7	7	1.16787	0.0673943	67.85	6	3.8	6	6	1.1767	0.0706658	76.492	8	3.3	5	5	1.4141	0.15048	116.69	5
	550	Tb927.10.520	Tb927.10.520		hypothetical protein, conserved	46.781	12.1	0	15.963	1	1	1.24716	0.0959231	0.0123565	1.9081	+	12.1	5	5	1.31063	0.117481	7.0031	5	12.1	5	5	1.1646	0.0661768	5.0841	6	12.1	5	5	1.2709	0.104111	32.394	11
	89	Tb927.5.4360;Tb05.5K5.20	Tb927.5.4360;Tb05.5K5.20		hypothetical protein, conserved ;hypothetical protein, conserved,BAC from homologous region on chr5	36.427	9.3	0	7.143	2	1	1.24613	0.095564	0.0359656	1.44411	+	9.3	3	3	1.10345	0.042752	8.0722	3	9.3	3	3	1.2921	0.111296	11.985	3	9.3	3	3	1.3572	0.132644	12.939	3
	267	Tb927.1.3950	Tb927.1.3950	ALAT	alanine aminotransferase (ALAT)	55.704	4.8	0.0034146	2.6483	1	1	1.24613	0.0955636	0.00806618	2.09333	+	0	0	0				0	3.4	1	1	1.2392	0.0931414	NaN	1	4.8	2	2	1.2531	0.0979857	NaN	1
	1313	Tb927.3.680	Tb927.3.680		cytochrome P450, putative	66.122	2.4	0.0042959	2.4185	1		1.24408	0.0948472	0.0187201	1.72769	+	2.4	1	1	1.19799	0.078454	NaN	1	2.4	1	1	1.1846	0.0735717	NaN	1	2.4	1	1	1.3568	0.132516	NaN	1
	1481	Tb927.5.2930	Tb927.5.2930		hypothetical protein, conserved	43.308	30	0	59.868	1	1	1.23805	0.0927398	0.0108389	1.96501	+	30	10	10	1.18489	0.0736781	18.326	19	25.9	10	10	1.2156	0.0847907	74.413	18	30	11	11	1.3175	0.119751	52.175	13
	1740	Tb927.7.3950	Tb927.7.3950	KRET1	RNA-editing complex protein,RNA-editing 3 terminal uridylyl transferase 1,KRET1 (KRET1)	107.38	2.3	0.0029412	2.6905	1	1	1.23729	0.09247	0.0359051	1.44484	+	2.3	2	2	1.26749	0.102945	NaN	1	1.5	1	1	1.2078	0.081995	NaN	1	0	0	0				0
	2133	Tb927.9.3640	Tb927.9.3640		hypothetical protein, conserved	22.632	32.3	0	109.75	1	1	1.23686	0.0923222	0.0230793	1.63678	+	32.3	6	6	1.35097	0.130645	18.84	7	32.3	6	6	1.1489	0.0602822	34.331	6	32.3	6	6	1.2191	0.0860393	12.101	6
	1332	Tb927.4.1300	Tb927.4.1300		amidinotransferase, putative	42.015	4.3	0	6.749	1		1.23628	0.0921184	0.0128965	1.88953	+	4.3	1	1	1.24696	0.0958527	NaN	1	0	0	0				0	4.3	1	1	1.2257	0.0883842	NaN	1
	547	Tb927.10.5120	Tb927.10.5120	KREPA6	KREPA6 (KREPA6)	18.09	29.9	0	15.603	1	1	1.23401	0.0913181	0.004161	2.3808	+	28	4	4	1.2701	0.103838	46.05	5	29.9	5	5	1.1896	0.075401	4.2548	5	23.8	4	4	1.2437	0.0947156	16.626	4
	1818	Tb927.7.800	Tb927.7.800	MRB800	mitochondrial RNA binding complex 1 subunit (MRB800)	60.484	8.5	0	27.734	1	1	1.23396	0.0912999	0.0118141	1.9276	+	8.5	2	2	1.24187	0.0940747	7.9232	2	4.8	1	1	1.3018	0.114544	NaN	1	8.5	2	2	1.1622	0.0652809	18.432	2
	1664	Tb927.7.1100	Tb927.7.1100		hypothetical protein, conserved	82.315	8.1	0	5.5834	1		1.2337	0.0912097	0.00211537	2.67461	+	4.1	2	2	1.24029	0.0935249	53.7	2	5.6	3	3	1.2021	0.0799406	11.181	3	5.6	3	3	1.2594	0.100164	10.138	3
	315	Tb927.10.11340;Tb11.v5.0604	Tb927.10.11340		hypothetical protein, conserved	155.73	7.1	0	15.856	2	1	1.23341	0.0911084	0.0101459	1.99371	+	6	7	7	1.26971	0.103705	18.682	5	5.4	7	7	1.1608	0.0647574	11.689	6	4.3	6	6	1.2731	0.104863	34.768	6
	675	Tb927.10.9960	Tb927.10.9960		hypothetical protein, conserved	50.168	2.6	0	5.7876	1	1	1.23304	0.0909766	0.00659202	2.18098	+	0	0	0				0	2.6	1	1	1.2384	0.0928609	22.059	2	2.6	1	1	1.2277	0.0890923	0.24988	2
	2099	Tb927.9.15240	Tb927.9.15240		hypothetical protein, conserved	28.749	36.3	0	45.018	1	1	1.23215	0.0906649	0.00708712	2.14953	+	25.8	5	5	1.22041	0.086504	19.448	7	31.5	6	6	1.1863	0.0741945	26.48	8	36.3	7	7	1.2921	0.111296	27.855	10
	297	Tb927.10.10400	Tb927.10.10400		hypothetical protein, conserved	37.867	20.6	0	36.211	1	1	1.22992	0.0898769	0.0156985	1.80414	+	20.6	7	7	1.15608	0.0629889	12.404	6	17.5	6	6	1.2227	0.0873199	11.979	6	20.6	7	7	1.3162	0.119322	21.59	8
	1054	Tb927.11.7070	Tb927.11.7070		ATP-dependent DEAD/H RNA helicase, putative	60.825	2.5	0	16.66	1	1	1.22862	0.0894169	0.039965	1.39832	+	2.5	1	1	1.1093	0.0450487	28.207	2	2.5	1	1	1.3741	0.138018	1.2425	2	2.5	1	1	1.2167	0.0851835	28.664	2
	1858	Tb927.8.1990	Tb927.8.1990	TRYP2	peroxidoxin (TRYP2)	25.631	57.5	0	91.099	1	1	1.22587	0.0884441	0.0140042	1.85374	+	54.4	12	12	1.16921	0.0678917	18.995	64	57.5	13	13	1.2009	0.0795068	12.923	75	57.5	13	13	1.312	0.117934	18.874	68
	1781	Tb927.7.5820	Tb927.7.5820		Monooxygenase, putative	55.086	3.1	0	5.6045	1	1	1.22485	0.0880842	0.00976496	2.01033	+	3.1	1	1	1.1652	0.0664014	NaN	1	3.1	1	1	1.2873	0.10968	NaN	1	3.1	1	1	1.2251	0.0881715	NaN	1
	2142	Tb927.9.4310	Tb927.9.4310		tricarboxylate carrier, putative	35.625	28.1	0	71.538	1	1	1.22479	0.0880625	0.0248637	1.60443	+	28.1	8	8	1.11638	0.0478132	22.21	9	28.1	8	8	1.2657	0.102331	13.096	9	22	6	6	1.3003	0.114044	12.947	7
	262	Tb927.1.3450	Tb927.1.3450		hypothetical protein, conserved	84.883	1.5	0	5.7366	1		1.22342	0.0875745	0.0262787	1.5804	+	1.5	1	1	1.23911	0.0931103	NaN	1	1.5	1	1	1.1192	0.0489077	NaN	1	1.5	1	1	1.3204	0.120706	NaN	1
	1241	Tb927.3.2880	Tb927.3.2880		hypothetical protein, conserved	12.643	40.4	0	55.612	1	1	1.2221	0.0871078	0.0260079	1.5849	+	40.4	5	5	1.13469	0.0548762	20.182	8	38.5	4	4	1.2044	0.0807707	8.6048	5	40.4	5	5	1.3356	0.125676	18.254	7
	1991	Tb927.8.7040	Tb927.8.7040		hypothetical protein, conserved	21.365	17.5	0	117.94	1	1	1.22088	0.0866739	0.0468074	1.32969	+	9	1	1	1.08606	0.0358536	5.8464	3	14.8	2	2	1.2288	0.0894812	21.164	3	11.6	2	2	1.3636	0.134687	NaN	1
	1944	Tb927.8.5370	Tb927.8.5370		hypothetical protein, conserved	51.062	17.2	0	19.291	1		1.2192	0.0860745	0.0451224	1.34561	+	14.2	5	5	1.17661	0.0706322	15.78	6	17.2	6	6	1.1158	0.0475864	28.507	7	17.2	6	6	1.3804	0.140005	22.666	6
	740	Tb927.11.12160	Tb927.11.12160		hypothetical protein, conserved	23.492	9	0	26.858	1	1	1.21902	0.0860113	0.0033797	2.47112	+	9	1	1	1.25244	0.0977577	2.1001	2	9	1	1	1.222	0.0870712	NaN	1	9	1	1	1.1836	0.073205	NaN	1
	154	Tb11.v5.0326	Tb11.v5.0326		retrotransposon hot spot (RHS) protein, putative	34.883	27.5	0	20.561	1	1	1.21878	0.0859238	0.0204734	1.68881	+	25.5	6	2	1.24631	0.0956253	3.6186	4	27.5	7	2	1.125	0.0511525	14.096	6	27.5	7	2	1.2912	0.110994	28.304	6
	144	Tb927.7.4550;Tb11.v5.0268	Tb927.7.4550;Tb11.v5.0268		60S ribosomal protein-like ;60S ribosomal protein-like, putative	19.423	40.4	0	78.848	2	1	1.21862	0.0858689	0.0190429	1.72027	+	32.8	3	3	1.24309	0.0945009	6.1194	4	40.4	4	4	1.1288	0.052617	9.841	5	40.4	4	4	1.2897	0.110489	10.926	4
	457	Tb927.10.1730	Tb927.10.1730		hypothetical protein, conserved	39.265	15.7	0	11.633	1	1	1.21549	0.0847497	0.0272818	1.56413	+	15.7	5	5	1.11003	0.0453331	15.631	5	15.7	5	5	1.241	0.0937718	15.375	6	15.7	5	5	1.3036	0.115144	11.228	4
	110	Tb11.02.5390b;Tb11.02.5390	Tb11.02.5390b;Tb11.02.5390		mRNA processing protein, putative ;mRNA processing protein, putative	120.71	14.5	0	69.003	2	1	1.21391	0.084186	0.0161642	1.79145	+	10	8	8	1.13736	0.0558975	18.849	8	12.4	10	10	1.2226	0.0872844	18.811	9	11.2	9	9	1.2864	0.109376	9.8325	6
	494	Tb927.10.2880	Tb927.10.2880		calcium channel protein, putative	303.77	1.3	0	6.0688	1		1.20981	0.0827183	0.0477324	1.32119	+	0.9	2	2	1.17856	0.0713533	0.20447	2	1.3	3	3	1.1007	0.041669	18.751	2	0.4	1	1	1.365	0.135133	NaN	1
	1688	Tb927.7.2330	Tb927.7.2330		hypothetical protein, conserved	123.84	7.7	0	34.485	1		1.20765	0.0819415	0.0387467	1.41177	+	7.7	2	2	1.26315	0.101456	4.4852	2	7.7	2	2	1.0808	0.0337453	2.3683	2	7.7	2	2	1.2901	0.110623	3.5701	2
	1981	Tb927.8.6530	Tb927.8.6530		hypothetical protein, conserved	41.897	10.5	0	21.043	1	1	1.20495	0.0809692	0.000369484	3.4324	+	10.5	3	3	1.19964	0.0790527	6.6032	3	10.5	3	3	1.1981	0.0784931	11.434	3	10.5	3	3	1.2172	0.0853619	1.1817	3
	778	Tb927.11.13560	Tb927.11.13560		hypothetical protein, conserved	60.61	4.2	0	16.876	1	1	1.20124	0.07963	0.0482518	1.31649	+	4.2	2	2	1.24923	0.0966441	3.7775	2	1.8	1	1	1.3031	0.114978	NaN	1	4.2	2	2	1.0648	0.027268	NaN	1
	1875	Tb927.8.2530	Tb927.8.2530		hypothetical protein, conserved	13.299	47.4	0	21.563	1	1	1.20111	0.0795833	0.0217007	1.66353	+	36	3	3	1.20055	0.0793811	7.6284	6	47.4	4	4	1.122	0.0499929	6.5416	5	47.4	4	4	1.2864	0.109376	8.0661	5
	1562	Tb927.6.2050	Tb927.6.2050		ribosome biogenesis regulatory protein (RRS1), putative	24.654	5.6	0	4.1717	1		1.20045	0.0793451	0.0226465	1.645	+	5.6	1	1	1.11527	0.0473819	12.325	2	5.6	1	1	1.2812	0.107617	NaN	1	5.6	1	1	1.2107	0.0830365	NaN	1
	1763	Tb927.7.5110	Tb927.7.5110		hypothetical protein, conserved	62.367	11.8	0	15.817	1	1	1.19842	0.0786105	0.0237217	1.62485	+	10.5	4	4	1.11588	0.0476193	17.504	10	9.7	4	4	1.1997	0.0790727	46.352	7	8.4	3	3	1.2857	0.10914	8.8015	3
	123	Tb927.7.4810;Tb11.v5.0163	Tb927.7.4810;Tb11.v5.0163		hypothetical protein, conserved ;hypothetical protein, conserved	52.176	34.3	0	39.199	2		1.19805	0.0784733	0.0288351	1.54008	+	28.8	8	8	1.27275	0.104743	12.239	7	34.3	11	11	1.0962	0.0398898	78.575	9	26.9	8	8	1.2325	0.0907869	22.023	7
	1058	Tb927.11.7380	Tb927.11.7380		glycerol-3-phosphate dehydrogenase (FAD-dependent), mitochondrial	66.991	39.6	0	160.4	1	1	1.19658	0.077941	0.0223157	1.65139	+	33.2	15	15	1.24699	0.0958635	12.948	15	39.6	18	18	1.1063	0.0438729	19.392	17	29.2	14	14	1.2419	0.0940866	19.954	17
	1251	Tb927.3.3270	Tb927.3.3270	TbPFK	ATP-dependent phosphofructokinase (TbPFK)	53.517	28.3	0	43.554	1		1.19594	0.0777079	0.0427833	1.36873	+	26.3	11	11	1.0797	0.0333046	30.362	11	23	10	10	1.2098	0.0827136	28.859	9	21.4	9	9	1.3095	0.117106	17.53	8
	2046	Tb927.9.11850	Tb927.9.11850	SMC1	structural maintenance of chromosome 1, putative (SMC1)	144.54	3.5	0	8.128	1		1.19536	0.0774997	0.0268878	1.57044	+	2.4	3	3	1.12704	0.0519393	33.727	3	2.7	3	3	1.1656	0.0665495	37.227	3	1.6	2	2	1.3002	0.11401	18.428	3
	1428	Tb927.5.1080	Tb927.5.1080	RBP22	RNA-binding protein, putative (RBP22)	26.869	4.2	0	3.171	1		1.1923	0.0763872	0.0207098	1.68382	+	4.2	1	1	1.27582	0.105789	NaN	1	4.2	1	1	1.1234	0.0505344	NaN	1	4.2	1	1	1.1826	0.0728379	NaN	1
	2023	Tb927.9.10520	Tb927.9.10520		hypothetical protein, conserved	29.587	32	0	139.46	1	1	1.19217	0.0763397	0.00343703	2.46382	+	27.3	6	6	1.16859	0.0676632	36.056	18	27.3	6	6	1.2267	0.0887384	31.928	14	28.1	6	6	1.182	0.0726175	27.823	15
	1756	Tb927.7.4440	Tb927.7.4440		hypothetical protein, conserved	31.573	15.8	0	6.9591	1	1	1.18928	0.0752831	0.0360435	1.44317	+	10.3	2	2	1.155	0.0625824	24.884	4	15.8	3	3	1.1124	0.046261	4.508	3	10.3	2	2	1.3092	0.117006	20.992	5
	526	Tb927.10.4130	Tb927.10.4130		NDUFA5/B13 subunit, putative	31.032	30.2	0	47.303	1	1	1.18716	0.0745093	0.030105	1.52136	+	30.2	8	8	1.20646	0.0815136	32.869	15	23	6	6	1.0924	0.0383817	8.9636	15	30.2	8	8	1.2695	0.103633	16.212	17
	785	Tb927.11.13750	Tb927.11.13750	RAB4	small GTPase, putative,ras-related rab-4 (RAB4)	22.057	36.4	0	15.112	1		1.1864	0.0742314	0.0208427	1.68105	+	24.7	4	3	1.18623	0.0741673	42.777	4	36.4	6	5	1.1147	0.047158	10.446	5	36.4	6	5	1.2629	0.101369	10.054	4
	220	Tb927.9.3590;Tb11.v5.0904	Tb927.9.3590;Tb11.v5.0904		monothiol glutaredoxin, putative ;glutaredoxin-like protein, putative	20.43	29.3	0	32.455	2	1	1.17972	0.0717801	0.0417067	1.37979	+	21.7	3	3	1.15596	0.0629437	15.309	4	29.3	4	4	1.093	0.0386202	10.091	4	29.3	4	4	1.2995	0.113776	9.0483	4
	850	Tb927.11.16460	Tb927.11.16460		hypothetical protein, conserved	82.494	7	0	32.586	1		1.17821	0.0712223	5.51384e-06	5.25855	+	4	2	2	1.17693	0.0707497	30.196	3	7	3	3	1.1789	0.071477	22.343	4	4	2	2	1.1788	0.0714401	24.314	4
	504	Tb927.10.3210	Tb927.10.3210		delta-1-pyrroline-5-carboxylate dehydrogenase, putative	62.036	48.5	0	300.51	1	1	1.17662	0.0706377	0.0302963	1.51861	+	43.5	23	23	1.09409	0.0390538	17.534	33	46	23	23	1.1767	0.0706658	19.209	37	44	22	22	1.2653	0.102194	19.818	30
	1280	Tb927.3.4390	Tb927.3.4390	GCVL-1	dihydrolipoamide dehydrogenase, putative (GCVL-1)	55.839	28.5	0	78.942	1	1	1.17643	0.0705667	0.0439869	1.35668	+	23	8	8	1.10968	0.0451981	21.068	8	28.5	11	11	1.1251	0.0511911	12.139	9	24.6	9	9	1.3041	0.115311	14.718	8
	2143	Tb927.9.4360	Tb927.9.4360	KREL1	KREL1 (KREL1)	52.226	3.8	0	3.5578	1	1	1.17605	0.070424	0.0287254	1.54173	+	3.8	2	2	1.27071	0.104047	6.8161	2	3.8	2	2	1.1074	0.0443045	0.5919	2	3.8	2	2	1.1559	0.0629203	21.375	2
	1294	Tb927.3.5090	Tb927.3.5090		tryparedoxin, putative	22.18	23.2	0	26.905	1		1.17429	0.0697755	0.0155704	1.8077	+	23.2	4	4	1.12476	0.0510592	21.989	10	23.2	4	4	1.1601	0.0644954	7.4323	6	23.2	4	4	1.241	0.0937718	10.528	6
	2202	Tb927.9.8410	Tb927.9.8410		chaperone protein DNAj, putative	35.594	55.1	0	165.12	1	1	1.17414	0.0697203	0.0322145	1.49195	+	55.1	19	19	1.13118	0.053533	34.383	31	53	18	18	1.1189	0.0487913	34.341	35	55.1	19	19	1.2789	0.106837	17.008	50
	232	Tb927.1.1210	Tb927.1.1210		hypothetical protein, conserved	16.902	11.1	0	4.144	1	1	1.17156	0.0687655	0.0281395	1.55068	+	11.1	2	2	1.12747	0.0521058	8.7822	3	11.1	2	2	1.1255	0.0513455	1.3744	3	11.1	2	2	1.2672	0.102845	8.0449	3
	2063	Tb927.9.12850	Tb927.9.12850		hypothetical protein, conserved	66.991	5.1	0	59.893	1	1	1.17141	0.0687091	0.0343727	1.46379	+	3.1	1	1	1.12616	0.0516017	NaN	1	3.1	1	1	1.1165	0.0478587	NaN	1	5.1	2	2	1.2784	0.106667	14.164	2
	1250	Tb927.3.3220	Tb927.3.3220		RNA polymerase-associated protein CTR9, putative	101.23	3.1	0	5.764	1		1.1714	0.0687037	0.0241436	1.6172	+	3.1	3	3	1.09665	0.0400671	23.032	3	3.1	3	3	1.1803	0.0719924	17.283	5	1.9	2	2	1.2418	0.0940517	30.776	2
	1434	Tb927.5.1300	Tb927.5.1300		vacuolar proton translocating ATPase subunit A, putative	89.63	1.8	0	3.8766	1		1.1711	0.068594	0.0109531	1.96046	+	1.8	1	1	1.1501	0.0607354	NaN	1	1.8	1	1	1.1376	0.0559896	NaN	1	1.8	1	1	1.2276	0.0890569	NaN	1
	1610	Tb927.6.3930	Tb927.6.3930		hypothetical protein, conserved	49.246	4.9	0	5.4268	1	1	1.16958	0.0680307	0.00472762	2.32536	+	4.9	2	2	1.15598	0.0629487	10.325	2	4.9	2	2	1.2057	0.0812393	6.9911	2	4.9	2	2	1.1479	0.0599041	24.22	2
	2088	Tb927.9.14200	Tb927.9.14200		hypothetical protein, conserved	44.532	22.3	0	55.652	1	1	1.16876	0.067724	0.0219663	1.65824	+	22.3	8	8	1.108	0.0445384	10.798	7	22.3	8	8	1.158	0.0637086	7.2892	8	22.3	7	7	1.2443	0.0949251	13.233	7
	2001	Tb927.8.7530	Tb927.8.7530		3,2-trans-enoyl-CoA isomerase, mitochondrial precursor, putative	39.776	39.7	0	164.65	1	1	1.16727	0.0671721	0.0193731	1.7128	+	37.7	10	8	1.10366	0.0428335	25.878	14	36.6	10	7	1.1715	0.0687423	23.364	17	34.6	9	7	1.2301	0.0899404	17.25	17
	1718	Tb927.7.3280	Tb927.7.3280		translation initiation factor IF-2, putative	79.66	24.7	0	94.088	1	1	1.16699	0.0670684	0.0440678	1.35588	+	20.1	12	12	1.17811	0.0711844	20.917	16	17.3	11	11	1.0671	0.0282051	13.981	17	20.1	12	12	1.2642	0.101816	16.747	14
	1726	Tb927.7.3500	Tb927.7.3500		glutathione-S-transferase/glutaredoxin, putative	35.436	53.2	0	103.49	1	1	1.16357	0.065791	0.037808	1.42242	+	52.2	13	13	1.10282	0.0425029	23.166	15	53.2	14	14	1.1246	0.0509981	23.414	16	43.6	12	12	1.2702	0.103872	11.473	13
	2169	Tb927.9.6270	Tb927.9.6270		hypothetical protein, conserved	57.132	5.3	0	6.0696	1		1.16275	0.065488	0.0457867	1.33926	+	5.3	2	2	1.12149	0.0497958	10.388	2	5.3	2	2	1.094	0.0390173	7.6713	2	5.3	2	2	1.2813	0.107651	6.2776	2
	1062	Tb927.11.7480	Tb927.11.7480		vacuolar type h ATPase subunit, putative	26.323	6	0	7.4574	1		1.16122	0.0649147	0.0275881	1.55928	+	6	1	1	1.14624	0.0592744	NaN	1	6	1	1				0	6	1	1	1.1764	0.070555	NaN	1
	1543	Tb927.6.1410	Tb927.6.1410		hypothetical protein, conserved	27.154	50.2	0	61.498	1	1	1.16122	0.064913	0.0337443	1.4718	+	45.9	11	11	1.20661	0.081566	19.764	12	50.2	12	12	1.07	0.0293838	14.633	16	50.2	12	12	1.2128	0.0837892	19.25	14
	1541	Tb927.6.1200	Tb927.6.1200		hypothetical protein, conserved	52.96	12.4	0	37.212	1	1	1.16084	0.0647722	0.0242426	1.61542	+	8.8	4	4	1.17085	0.0685014	6.739	4	12.4	5	5	1.0901	0.0374663	8.5415	4	8.8	4	4	1.2256	0.0883488	19.2	6
	1305	Tb927.3.5530	Tb927.3.5530	Tb-292	Tb-292 membrane associated protein (Tb-292)	279.19	5.1	0	33.089	1		1.16052	0.064653	0.0362539	1.44064	+	3.6	8	8	1.07954	0.033239	31.617	6	4.7	10	10	1.1579	0.0636711	22.237	8	3.8	8	8	1.2504	0.097049	27.058	10
	1484	Tb927.5.3090	Tb927.5.3090		hypothetical protein, conserved	11.655	65.3	0	101.14	1	1	1.16048	0.064637	0.04418	1.35477	+	65.3	6	6	1.18909	0.0752143	19.224	16	46.5	5	5	1.0589	0.0248549	28.99	11	65.3	6	6	1.2412	0.0938418	17.19	13
	643	Tb927.10.8890	Tb927.10.8890		kinetoplast DNA-associated protein, putative	23.503	9.1	0	5.2904	1	1	1.15874	0.0639871	0.00285241	2.54479	+	3.8	1	1	1.18136	0.0723833	NaN	1	9.1	2	2	1.1365	0.0555694	20.796	2	9.1	2	2	1.1588	0.0640085	12.337	2
	294	Tb927.10.10320	Tb927.10.10320		dynein light chain, putative,dynein Tctex1 family, putative	12.161	28.4	0	19.705	1		1.15757	0.0635462	0.0198569	1.70209	+	28.4	3	3	1.13167	0.0537197	75.832	3	28.4	3	3	1.1156	0.0475085	192.05	3	28.4	3	3	1.2286	0.0894105	187.35	3
	870	Tb927.11.1700	Tb927.11.1700		hypothetical protein, conserved	61.63	8.6	0	11.802	1	1	1.15697	0.0633231	0.012174	1.91457	+	5.4	2	2	1.18237	0.0727529	2.9657	3	8.6	3	3	1.1858	0.0740114	30.306	3	5.4	2	2	1.1046	0.043205	20.078	3
	1129	Tb927.2.2220	Tb927.2.2220		hypothetical protein, conserved	34.219	18.5	0	84.31	1		1.15597	0.0629456	0.0041313	2.38391	+	18.5	3	3	1.17331	0.0694126	22.867	4	18.5	3	3	1.1694	0.0679631	11.546	4	18.5	3	3	1.1258	0.0514612	7.507	4
	1182	Tb927.2.5210	Tb927.2.5210		3-oxoacyl-ACP reductase, putative	25.671	16.2	0	46.451	1	1	1.15519	0.0626547	0.0217006	1.66353	+	5.4	1	1	1.14504	0.0588216	NaN	1	16.2	3	3	1.1001	0.0414322	10.337	3	16.2	3	3	1.2238	0.0877104	3.5516	3
	973	Tb927.11.4640	Tb927.11.4640		calpain-like protein, putative	117.22	4.4	0	20.083	1		1.15418	0.0622752	0.0280665	1.55181	+	3.3	2	2	1.08441	0.0351937	2.4639	2	4.4	3	3	1.1563	0.0630705	28.417	2	4.4	3	3	1.2262	0.0885613	14.162	2
	628	Tb927.10.8160	Tb927.10.8160		hypothetical protein, conserved	12.267	17.8	0	5.9391	1		1.1539	0.0621673	0.00771002	2.11294	+	17.8	2	2	1.17811	0.0711844	134.37	3	9.3	1	1	1.1714	0.0687052	NaN	1	9.3	1	1	1.1133	0.0466122	4.2586	2
	802	Tb927.11.1450	Tb927.11.1450		2-oxoglutarate dehydrogenase E1 component, putative	113.38	61	0	323.31	1	1	1.15078	0.0609927	0.0148453	1.82841	+	58.8	56	56	1.09825	0.040701	25.236	121	59.1	59	59	1.1614	0.0649818	15.603	136	57.2	59	59	1.1948	0.0772952	17.249	126
	602	Tb927.10.7410	Tb927.10.7410		succinyl-CoA ligase [GDP-forming] beta-chain, putative	44.905	57	0	269.1	1	1	1.15058	0.060915	0.00142907	2.84495	+	44.2	18	18	1.13362	0.0544674	24.631	28	54.7	21	21	1.1615	0.0650192	18.189	33	51.6	20	20	1.1568	0.0632583	23.12	36
	624	Tb927.10.8070	Tb927.10.8070		ATPase, putative	55.555	18.1	0	23.886	1		1.1501	0.0607356	0.0191658	1.71747	+	14.2	4	4	1.16313	0.0656278	8.4987	4	18.1	5	5	1.1997	0.0790727	25.732	4	8.3	2	2	1.0902	0.0375062	21.882	2
	1996	Tb927.8.7380;Tb927.4.5050	Tb927.8.7380;Tb927.4.5050		dihydrolipoamide dehydrogenase, point mutation,acetoin dehydrogenase e3 component, putative ;dihydrolipoamide dehydrogenase, pseudogene, putative,acetoin dehydrogenase e3 component, point mutation,dihydrolipoamide dehydrogenase, point mutation	60.014	40.5	0	140.64	2	1	1.14982	0.0606302	0.0475068	1.32324	+	33.5	14	14	1.09511	0.0394579	20.941	16	36.4	16	16	1.1003	0.0415111	21.552	22	33.9	15	15	1.2616	0.100922	25.811	17
	1483	Tb927.5.3010;Tb11.v5.0691	Tb927.5.3010;Tb11.v5.0691		MRB1-associated protein, putative,guide RNA binding protein, putative ;hypothetical protein, conserved	57.748	26.6	0	70.328	2	1	1.14766	0.0598136	0.0482347	1.31664	+	23.1	10	10	1.21904	0.0860167	16.744	7	22.3	9	9	1.0481	0.0204027	5.302	9	16.7	8	8	1.1831	0.0730215	16.426	14
	1225	Tb927.3.2150	Tb927.3.2150		protein phosphatase 2C, putative	40.009	24.6	0	41.721	1	1	1.1473	0.0596754	0.0177075	1.75184	+	22.4	6	6	1.10113	0.0418376	32.001	6	21.8	6	6	1.1374	0.0559132	22.235	5	14.6	4	4	1.2058	0.0812753	9.4057	4
	1238	Tb927.3.2670	Tb927.3.2670		hypothetical protein, conserved	28.84	52.4	0	166.79	1	1	1.14562	0.0590397	0.0429109	1.36743	+	52.4	10	10	1.13932	0.056644	17.674	14	52.4	10	10	1.0672	0.0282458	17.318	15	52.4	10	10	1.2366	0.0922292	15.817	19
	1338	Tb927.4.1500	Tb927.4.1500	REH2	RNA editing associated helicase 2 (REH2)	241.82	15.8	0	197.97	1	1	1.14483	0.0587397	0.0323539	1.49007	+	14	24	24	1.13051	0.0532727	10.421	23	13.7	24	24	1.0831	0.0346686	16.483	25	14.5	25	25	1.2254	0.0882779	15.172	20
	390	Tb927.10.14000	Tb927.10.14000	ACO	aconitase (ACO)	98.314	27.4	0	206.75	1	1	1.14461	0.0586567	0.0288418	1.53998	+	19.4	14	14	1.07626	0.0319188	33.809	13	26.4	18	18	1.1516	0.0613017	31.554	20	23.6	16	16	1.2099	0.0827495	18.975	16
	1774	Tb927.7.5540	Tb927.7.5540		2,4-dienoyl-coa reductase-like protein	80.352	23.4	0	53.855	1	1	1.1437	0.0583108	0.0274353	1.56169	+	23.4	12	12	1.07235	0.0303372	20.273	13	22.2	11	11	1.1683	0.0675544	26.063	13	21.9	11	11	1.1941	0.0770407	20.657	10
	1414	Tb927.4.560	Tb927.4.560		Cytoplasmic dynein 2 heavy chain (DYNC2H1), putative	479.84	5.3	0	76.845	1		1.14298	0.058038	0.0448725	1.34802	+	4.4	17	17	1.06741	0.0283299	18.302	14	5.1	19	18	1.1306	0.053309	29.03	17	4.5	17	17	1.2373	0.092475	44.678	16
	1406	Tb927.4.4910	Tb927.4.4910		3,2-trans-enoyl-CoA isomerase, mitochondrial precursor, putative	45.333	24.8	0	32.823	1	1	1.14196	0.0576523	0.00425135	2.37147	+	23	7	5	1.13381	0.0545413	9.1234	9	24.8	8	5	1.1229	0.0503411	24.088	8	19.5	6	4	1.1697	0.0680745	17.535	12
	822	Tb927.11.15240	Tb927.11.15240	RAB2	small GTPase, putative,ras-related protein rab-2a, putative (RAB2)	23.511	23.6	0	18.03	1		1.14154	0.0574908	0.00131397	2.88141	+	23.6	4	4	1.14328	0.0581508	14.675	4	23.6	4	4	1.1274	0.052078	10.021	4	17.5	3	3	1.1541	0.0622434	17.14	3
	1212	Tb927.3.1790	Tb927.3.1790		pyruvate dehydrogenase E1 beta subunit, putative	37.566	51.4	0	323.31	1	1	1.14145	0.0574571	0.0165524	1.78114	+	49.4	17	17	1.11056	0.0455404	15.683	20	51.4	18	18	1.1168	0.0479754	33.024	23	48.6	17	17	1.1991	0.0788554	8.4102	24
	833	Tb927.11.15860;Tb927.11.15840	Tb927.11.15860;Tb927.11.15840		L-Lysine transport protein, putative ;L-Lysine transport protein, putative	50.086	2.4	0	3.6704	2	1	1.13825	0.0562358	0.0279379	1.55381	+	2.4	1	1	1.11416	0.0469462	NaN	1	2.4	1	1	1.092	0.0382226	NaN	1	2.4	1	1	1.2121	0.0835385	NaN	1
	1043	Tb927.11.6640	Tb927.11.6640	CYB5	cytochrome b5, putative (CYB5)	14.754	20.3	0	11.386	1		1.13714	0.0558155	0.0284231	1.54633	+	20.3	2	2	1.19822	0.0785372	18.007	4	20.3	2	2	1.1438	0.0583501	1.1643	2	20.3	2	2	1.0729	0.0305592	22.879	4
	930	Tb927.11.3280;Tb927.9.3650	Tb927.11.3280;Tb927.9.3650	Kif13-5	kinesin, putative,MCAK-like kinesin, putative (Kif13-5) ;kinesin (Kif-13-1)	80.07	2.8	0	10.788	2		1.1367	0.055647	0.0412725	1.38434	+	2.8	2	2	1.05171	0.0218971	41.799	4	2.8	2	2	1.1699	0.0681487	7.9703	4	2.8	2	2	1.1937	0.0768952	36.889	4
	1882	Tb927.8.2770;Tb11.v5.0808	Tb927.8.2770		insulin receptor,Ryanodine receptor	342.48	4.6	0	53.927	2		1.13644	0.0555453	0.0287154	1.54189	+	3.7	10	10	1.13012	0.0531254	14.852	10	4.2	12	12	1.0783	0.0327396	41.661	10	3.5	9	9	1.2044	0.0807707	22.348	9
	2138	Tb927.9.4190	Tb927.9.4190	ACS1	fatty acyl CoA syntetase 1 (ACS1)	78.959	17	0	32.16	1		1.13594	0.055357	0.039282	1.40581	+	17	10	10	1.14903	0.060331	13.062	9	17	10	10	1.0583	0.0246088	17.177	10	13.9	9	9	1.2054	0.0811312	25.99	9
	1121	Tb927.11.9980	Tb927.11.9980		2-oxoglutarate dehydrogenase E1 component, putative	112.95	58	0	323.31	1	1	1.13269	0.0541101	0.0226525	1.64488	+	56.4	50	50	1.07461	0.031251	33.712	96	57.9	55	55	1.1472	0.0596391	30.1	107	54.6	51	51	1.1788	0.0714401	29.795	106
	1087	Tb927.11.8870	Tb927.11.8870	KREH1	mitochondrial DEAD box protein,KREH1 (KREH1)	60.659	38.3	0	186.84	1	1	1.1326	0.0540779	0.0370866	1.43078	+	33.2	16	16	1.14628	0.0592893	25.606	25	36.1	17	17	1.0588	0.0248139	19.694	31	38.3	18	18	1.1971	0.0781304	26.296	30
	358	Tb927.10.12720	Tb927.10.12720		hypothetical protein, conserved	104.64	1.9	0.0074074	2.0902	1		1.13163	0.053706	0.0455988	1.34105	+	1.9	2	2	1.04551	0.0193286	6.3865	3	1.9	2	2	1.1637	0.065841	1.3043	2	1.9	2	2	1.1911	0.0759482	8.4784	3
	1852	Tb927.8.1870	Tb927.8.1870	tGLP1	Golgi/lysosome glycoprotein 1 (tGLP1)	67.597	6.3	0	11.233	1		1.13123	0.0535522	0.0304362	1.51661	+	4.4	2	2	1.20308	0.0802945	0.88705	2	6.3	3	3	1.0812	0.033906	15.574	2	6.3	3	3	1.1129	0.0464561	12.104	3
	636	Tb927.10.8410	Tb927.10.8410		hypothetical protein, conserved	27.797	8	0	4.681	1		1.13114	0.0535149	0.00963727	2.01605	+	8	2	2	1.14273	0.0579423	12.322	3	8	2	2	1.0935	0.0388188	3.8418	3	8	2	2	1.1582	0.0637836	16.01	4
	531	Tb927.10.430	Tb927.10.430		hypothetical protein, conserved	41.585	27.6	0	33.16	1	1	1.1303	0.0531926	0.0279196	1.55409	+	25.5	9	9	1.19972	0.0790788	11.321	6	18.8	7	7	1.0876	0.0364692	4.4904	6	21.2	8	8	1.1067	0.0440299	25.751	7
	1555	Tb927.6.1840	Tb927.6.1840		hypothetical protein, conserved	36.741	14.2	0	17.719	1	1	1.13012	0.0531261	0.0440183	1.35637	+	11.9	4	4	1.04564	0.0193831	131.59	3	11.3	4	4	1.1795	0.0716979	11.48	3	5.8	2	2	1.1703	0.0682972	12.822	2
	1494	Tb927.5.3350	Tb927.5.3350		iron superoxide dismutase, putative	26.824	43.3	0	162.02	1	1	1.12998	0.0530699	0.0458836	1.33834	+	43.3	9	9	1.18794	0.0747962	37.449	12	43.3	8	8	1.0445	0.0189084	12.757	13	43.3	8	8	1.1628	0.065505	17.148	13
	608	Tb927.10.7570;Tb11.v5.0774	Tb927.10.7570;Tb11.v5.0774		dihydrolipoamide acetyltransferase E2 subunit, putative ;dihydrolipoamide acetyltransferase precursor, putative	48.107	35.3	0	215.41	2	1	1.1283	0.0524236	0.0149763	1.8246	+	30.4	11	11	1.08834	0.0367648	24.107	12	35.3	12	12	1.1262	0.0516155	12.515	14	35.3	12	12	1.1719	0.0688906	12.885	14
	1525	Tb927.5.570	Tb927.5.570		hypothetical protein, conserved	233.39	2.9	0	11.843	1		1.12803	0.0523211	0.0207022	1.68398	+	1.2	3	3	1.08647	0.0360187	32.102	3	2.1	4	4	1.1837	0.0732416	22.85	4	2.1	4	4	1.1161	0.0477031	56.732	3
	2007	Tb927.8.8170	Tb927.8.8170	MRB8170	mitochondrial RNA binding protein 1, putative (MRB8170)	100.4	25.9	0	154.14	1	1	1.12652	0.0517406	0.0325788	1.48707	+	21.9	19	15	1.1763	0.0705198	24.461	33	25.9	23	18	1.0583	0.0246088	24.751	39	24.6	22	17	1.1484	0.0600932	26.884	34
	1672	Tb927.7.1600	Tb927.7.1600		C-1-tetrahydrofolate synthase, cytoplasmic, putative	31.931	45	0	68.398	1	1	1.12553	0.0513557	0.0220006	1.65757	+	45	8	8	1.0733	0.0307192	15.254	10	32.9	7	7	1.1334	0.0543832	14.607	7	45	8	8	1.1721	0.0689647	28.598	11
	445	Tb927.10.15790	Tb927.10.15790		hypothetical protein, conserved	16.775	40.7	0	43.735	1	1	1.12501	0.0511563	0.0120418	1.91931	+	40.7	6	6	1.0863	0.0359479	16.218	13	40.7	6	6	1.1575	0.063521	20.243	12	40.7	6	6	1.1324	0.0539999	12.802	9
	2228	Tb927.9.9860	Tb927.9.9860		hypothetical protein, conserved	79.857	9.3	0	30.46	1		1.12439	0.0509178	0.04431	1.3535	+	7.4	4	4	1.08186	0.034173	10.859	4	9.3	5	5	1.2118	0.0834309	6.9129	4	6.4	4	4	1.0843	0.0351495	16.436	4
	1614	Tb927.6.4080	Tb927.6.4080		hypothetical protein, conserved	24.735	16.6	0	19.723	1	1	1.12427	0.0508722	0.0315379	1.50117	+	9.8	2	2	1.19467	0.0772486	5.2936	2	16.6	3	3	1.0799	0.0333835	11.98	2	9.8	2	2	1.1015	0.0419845	17.199	3
	1533	Tb927.5.900;Tb11.v5.0559;Tb927.5.910;Tb927.5.890;Tb11.v5.0558	Tb927.5.900;Tb11.v5.0559;Tb927.5.910		oligosaccharyl transferase subunit, putative ;oligosaccharyl transferase subunit, putative ;oligosaccharyl transferase subunit, putative	92.232	9.5	0	38.057	5		1.12393	0.0507401	0.0233038	1.63257	+	9.5	5	5	1.06839	0.0287288	9.7511	5	9.5	5	5	1.1657	0.0665868	11.959	5	9.5	5	5	1.14	0.0569049	17.858	5
	2075	Tb927.9.13580	Tb927.9.13580		hypothetical protein, conserved	48.929	24.9	0	35.452	1	1	1.12307	0.0504058	0.0234772	1.62935	+	24.6	9	9	1.15207	0.0614803	12.604	9	19.9	8	8	1.066	0.0277572	30.497	12	24.9	10	10	1.1534	0.0619799	16.861	15
	975	Tb927.11.4680	Tb927.11.4680		hypothetical protein, conserved	40.02	8.7	0	7.9334	1	1	1.12296	0.0503644	0.00448427	2.34831	+	8.7	4	4	1.14159	0.0575108	12.263	6	8.1	3	3	1.1281	0.0523476	10.373	5	8.7	5	5	1.0996	0.0412347	33.717	11
	295	Tb927.10.10330	Tb927.10.10330		hypothetical protein, conserved	62.877	3.1	0	6.1279	1		1.12217	0.0500592	0.0115145	1.93875	+	3.1	1	1	1.12686	0.0518708	NaN	1	3.1	1	1	1.1175	0.0482475	NaN	1	0	0	0				0
	549	Tb927.10.5140;Tb11.02.5050b;Tb927.11.7210	Tb927.10.5140		protein kinase, putative,mitogen-activated protein kinase 2, putative	49.74	22.2	0	28.819	3		1.12053	0.0494238	0.0395198	1.40318	+	20.4	7	7	1.05619	0.0237418	14.1	9	16.5	6	6	1.1209	0.0495669	15.431	8	22.2	8	8	1.1884	0.0749626	16.997	11
	356	Tb927.10.12700	Tb927.10.12700		pyruvate dehydrogenase E1 alpha subunit, putative	42.511	44.4	0	94.277	1	1	1.12032	0.0493438	0.00649131	2.18767	+	38.4	14	14	1.09425	0.0391156	25.769	26	44.4	16	16	1.1225	0.0501863	25.314	30	44.4	15	15	1.1448	0.0587296	16.605	25
	1745	Tb927.7.4020	Tb927.7.4020		protein phosphatase 2C, putative	78.079	2.1	0.0010101	3.0056	1		1.1203	0.0493359	0.0407636	1.38973	+	2.1	1	1	1.19305	0.0766575	14.656	2	2.1	1	1	1.0589	0.0248549	16.205	3	2.1	1	1	1.113	0.0464952	28.636	4
	1833	Tb927.8.1270	Tb927.8.1270		hypothetical protein, conserved	53.545	7.6	0	4.6565	1		1.11997	0.0492048	0.018537	1.73196	+	7.6	3	3	1.0886	0.0368688	23.227	3	4.7	2	2	1.1023	0.0422998	11.785	2	4.7	2	2	1.1707	0.0684456	46.78	2
	1142	Tb927.2.3030	Tb927.2.3030		ATP-dependent Clp protease subunit, heat shock protein 78 (HSP78), putative	90.664	35.2	0	165.42	1		1.11932	0.0489558	0.0209624	1.67856	+	29.2	22	22	1.09839	0.0407582	18.512	38	29.8	21	21	1.0879	0.036589	32.181	36	30.2	20	20	1.1736	0.0695201	24.228	34
	2180	Tb927.9.7070	Tb927.9.7070	RRP40	exosome complex exonuclease RRP40 (RRP40)	31.952	6.2	0	22.412	1		1.11922	0.0489154	0.0319559	1.49545	+	6.2	1	1	1.05534	0.0233933	NaN	1	6.2	1	1	1.164	0.065953	NaN	1	6.2	1	1	1.1413	0.0573998	NaN	1
	872	Tb927.11.1710	Tb927.11.1710	GBP21	mitochondrial RNA binding protein 1,gBP21, MRP1 (GBP21)	23.253	56.3	0	120.3	1	1	1.11706	0.0480765	0.0353189	1.45199	+	56.3	14	14	1.0524	0.0221804	16.526	17	51.5	13	13	1.1334	0.0543832	12.317	23	48.1	12	12	1.1686	0.0676659	17.192	23
	1393	Tb927.4.4320	Tb927.4.4320		divalent cation tolerance protein, putative	12.973	12.9	0	3.7843	1	1	1.11695	0.0480356	0.0260465	1.58425	+	12.9	1	1	1.0812	0.0339052	NaN	1	12.9	1	1	1.1766	0.0706288	NaN	1	12.9	1	1	1.0954	0.0395727	NaN	1
	293	Tb927.10.10160	Tb927.10.10160		hypothetical protein, conserved	42.907	14.7	0	43.747	1	1	1.11687	0.0480012	0.0491886	1.30814	+	14.7	6	6	1.14976	0.0606056	7.5834	7	14.7	6	6	1.0368	0.015695	9.0703	6	14.7	6	6	1.1687	0.067703	9.3811	8
	1615	Tb927.6.4090	Tb927.6.4090	HSP60	chaperonin HSP60, mitochondrial precursor, putative (HSP60)	58.37	34.9	0	130.2	1	1	1.11648	0.0478494	0.0299063	1.52424	+	34.9	13	13	1.06921	0.029063	18.527	18	30.3	12	12	1.1056	0.043598	21.36	14	30.3	12	12	1.1773	0.0708871	25.784	19
	121	Tb11.1790;Tb927.2.1170;Tb927.2.720;Tb927.11.17840;Tb927.5.160	Tb11.1790;Tb927.2.1170		retrotransposon hot spot protein (RHS, pseudogene), putative ;retrotransposon hot spot protein 5 (RHS5), putative	64.461	16.1	0	29.557	5		1.11623	0.0477542	0.0343465	1.46412	+	16.1	9	1	1.12039	0.0493674	23.539	2	16.1	9	1	1.0571	0.0241161	5.1078	3	14.9	8	1	1.1743	0.0697791	41.914	3
	1498	Tb927.5.3410	Tb927.5.3410		hypothetical protein, conserved	30.982	16	0	18.909	1	1	1.11621	0.0477469	0.00100801	2.99654	+	16	4	4	1.11662	0.0479053	15.676	4	16	4	4	1.1065	0.0439514	18.462	3	16	4	4	1.1256	0.0513841	7.6135	5
	1151	Tb927.2.3800	Tb927.2.3800		guide RNA associated protein, GAP1,MRB1-associated protein	55.46	33.9	0	162.04	1	1	1.11089	0.0456709	0.0120349	1.91956	+	31.5	11	11	1.07709	0.0322508	14.762	13	29.1	12	12	1.1163	0.0477809	14.85	18	29.1	12	12	1.1402	0.056981	16.572	14
	1602	Tb927.6.3600	Tb927.6.3600		hypothetical protein, conserved	49.213	5.2	0	4.808	1	1	1.11085	0.0456553	0.00254492	2.59433	+	5.2	2	2	1.10844	0.0447116	19.735	2	5.2	2	2	1.0978	0.0405232	13.738	3	5.2	2	2	1.1265	0.0517312	17.457	3
	134	Tb927.5.295b;Tb11.v5.0214	Tb927.5.295b;Tb11.v5.0214		retrotransposon hotspot (RHS) protein 1 ;retrotransposon hot spot (RHS) protein, putative	95.127	35.9	0	209.02	2	1	1.11002	0.0453297	0.028893	1.53921	+	32.6	22	13	1.09026	0.0375312	13.847	27	32.8	24	15	1.0732	0.0306807	50.675	36	34	24	14	1.1689	0.0677774	16.933	30
	677	Tb927.11.10020	Tb927.11.10020		short-chain dehydrogenase, putative	33.958	47.6	0	117.85	1		1.10948	0.045118	0.0281829	1.55001	+	42.5	10	10	1.07175	0.0300951	82.197	18	47.6	13	13	1.0921	0.0382624	14.363	23	45.4	12	12	1.1668	0.0669964	17.735	29
	1247	Tb927.3.3140	Tb927.3.3140		hypothetical protein, conserved	14.652	22.1	0	17.444	1		1.10882	0.0448591	0.0267918	1.572	+	22.1	2	2	1.1528	0.0617555	35.423	2	22.1	2	2	1.0585	0.0246909	18.56	2	16	1	1	1.1172	0.0481309	NaN	1
	114	Tb927.11.18680;Tb11.0845	Tb927.11.18680;Tb11.0845	DYNLL1	dynein light chain LC8, putative (DYNLL1) ;dynein light chain LC8, putative (DYNLL2)	10.429	51.1	0	49.015	2		1.10865	0.0447929	0.00266961	2.57355	+	51.1	6	6	1.09223	0.0383132	19.639	8	51.1	6	6	1.1194	0.0489853	20.63	14	51.1	6	6	1.1145	0.0470801	16.558	15
	2095	Tb927.9.15060	Tb927.9.15060		rRNA processing protein, putative	28.483	14.3	0	42.73	1		1.10594	0.0437324	0.0315078	1.50158	+	14.3	3	3	1.16609	0.0667304	69.313	3	14.3	3	3	1.0734	0.0307616	3.9032	2	14.3	3	3	1.0807	0.0337052	8.2294	3
	167	Tb927.10.540;Tb11.v5.0414	Tb927.10.540;Tb11.v5.0414		ATP-dependent DEAD/H RNA helicase, putative,DEAD box RNA helicase, putative ;ATP-dependent DEAD/H RNA helicase, putative	49.226	18.6	0	16.433	2		1.10512	0.04341	0.0465467	1.33211	+	14.4	6	6	1.04133	0.0175885	10.45	4	14.7	5	5	1.1113	0.0458313	16.523	5	14.7	5	5	1.1663	0.0668103	11.072	4
	1567	Tb927.6.2170	Tb927.6.2170		co-chaperone GrpE, putative	23.877	50	0	76.728	1	1	1.10384	0.0429077	0.0456316	1.34073	+	48.2	10	10	1.06848	0.0287659	20.614	11	50	11	11	1.0695	0.0291808	18.104	18	50	11	11	1.177	0.0707765	16.602	20
	1437	Tb927.5.1470	Tb927.5.1470	B5R	NADH-cytochrome b5 reductase, putative (B5R)	32.756	41.5	0	98.673	1	1	1.10382	0.0428991	0.042958	1.36696	+	41.5	12	12	1.13961	0.0567578	26.129	19	41.5	12	12	1.0375	0.0159881	12.684	20	41.5	12	12	1.1375	0.0559514	13.186	17
	347	Tb927.10.12430	Tb927.10.12430		hypothetical protein, conserved	73.017	14.2	0	61.071	1		1.1038	0.0428912	0.048079	1.31804	+	14.2	8	8	1.03319	0.0141785	17.251	7	12	7	7	1.1402	0.056981	21.068	6	12	7	7	1.1416	0.057514	17.515	6
	411	Tb927.10.14760	Tb927.10.14760		hypothetical protein, conserved	20.51	6.3	0.0010091	2.9964	1		1.10303	0.0425892	0.0163561	1.78632	+	6.3	1	1	1.0735	0.0308032	23.73	2	6.3	1	1	1.0949	0.0393745	15.023	3	6.3	1	1	1.1418	0.05759	7.6458	2
	1917	Tb927.8.4330	Tb927.8.4330	RAB11	small GTP-binding protein Rab11 (RAB11)	23.527	37	0	47.599	1		1.10302	0.0425853	0.00187442	2.72713	+	37	6	6	1.11149	0.0459071	10.517	6	30.1	5	5	1.09	0.0374265	12.109	5	37	6	6	1.1077	0.0444222	15.901	6
	1186	Tb927.2.560	Tb927.2.560		retrotransposon hot spot protein 4 (RHS4), putative	95.911	7.2	0	6.0632	1		1.10253	0.042389	0.0350156	1.45574	+	6.2	5	1	1.05785	0.0244257	107.8	6	7.2	6	1	1.0914	0.0379839	3.0831	4	7.2	6	1	1.1608	0.0647574	8.9267	4
	986	Tb927.11.5030	Tb927.11.5030		hypothetical protein, conserved	35.573	8.9	0	15.675	1		1.10241	0.0423443	0.031855	1.49682	+	8.9	3	3	1.09706	0.040229	9.5464	4	8.9	3	3	1.0569	0.0240339	7.1841	6	8.9	3	3	1.1555	0.0627699	17.09	5
	1153	Tb927.2.3920	Tb927.2.3920		hypothetical protein, conserved	18.392	39.8	0	11.792	1	1	1.10197	0.0421698	0.0256416	1.59106	+	39.8	7	7	1.08355	0.0348501	13.389	9	27.3	5	5	1.0711	0.02983	29.902	12	27.3	5	5	1.153	0.0618293	26.875	7
	1771	Tb927.7.5480	Tb927.7.5480	DHFR-TS	dihydrofolate reductase-thymidylate synthase (DHFR-TS)	58.85	31.5	0	117.78	1	1	1.10146	0.0419695	0.0455256	1.34174	+	31.5	13	13	1.09005	0.037446	18.742	17	25.6	11	11	1.0495	0.0209824	14.754	22	31.5	13	13	1.1681	0.06748	19.245	17
	2130	Tb927.9.3470	Tb927.9.3470		low molecular weight protein tyrosine phosphatase, putative	30.489	49.4	0	57.986	1	1	1.10058	0.0416217	0.0459771	1.33746	+	49.4	16	16	1.08579	0.0357451	23.035	29	48.7	15	15	1.051	0.0216027	17.017	33	49.4	16	16	1.1682	0.0675172	15.025	42
	2134	Tb927.9.3680	Tb927.9.3680		hypothetical protein, conserved	151.5	2.4	0	7.8011	1		1.09979	0.041309	0.027421	1.56192	+	2.4	3	3	1.05013	0.0212445	24.912	3	0.8	1	1	1.1305	0.0532706	NaN	1	2.4	3	3	1.1205	0.0494119	7.5784	3
	1272	Tb927.3.3900	Tb927.3.3900	CPT II	carnitine O-palmitoyltransferase II, putative (CPT II)	67.395	11.3	0	26.971	1	1	1.09758	0.0404373	0.0459239	1.33796	+	6.6	3	3	1.03727	0.0158914	0.44005	2	11.3	5	5	1.1509	0.0610376	7.2397	4	11.3	5	5	1.1076	0.0443829	15.52	4
	728	Tb927.11.11680	Tb927.11.11680		2-oxoglutarate dehydrogenase E2 component, putative	41.143	48.3	0	127.03	1	1	1.09749	0.0404003	0.00808843	2.09214	+	43.3	16	16	1.07264	0.0304536	18.933	45	48.3	18	18	1.1034	0.042733	22.493	50	48.3	17	17	1.1169	0.0480143	32.769	57
	1002	Tb927.11.5450	Tb927.11.5450		malic enzyme	63.119	29.8	0	90.127	1	1	1.09311	0.0386654	0.0134953	1.86982	+	28	10	10	1.08957	0.0372567	22.123	12	28.2	10	10	1.0671	0.0282051	18.247	13	24.2	10	10	1.1234	0.0505344	22.557	13
	1149	Tb927.2.3780	Tb927.2.3780		translation initiation factor IF-2, putative	94.472	14.9	0	99.072	1		1.09192	0.0381897	0.00758577	2.12	+	14.9	12	12	1.08965	0.0372851	18.818	13	13.9	10	10	1.0726	0.0304378	20.1	10	14.9	11	11	1.1139	0.0468462	24.44	10
	1876	Tb927.8.2540	Tb927.8.2540		3-ketoacyl-CoA thiolase, putative	46.244	31.5	0	159.24	1	1	1.09173	0.0381154	0.035832	1.44573	+	29.5	10	10	1.0392	0.0166985	57	16	31.5	11	11	1.125	0.0511525	30.151	19	31.1	10	10	1.113	0.0464952	24.509	22
	816	Tb927.11.15040	Tb927.11.15040	Cpn60	chaperonin HSP60, mitochondrial precursor, putative,heat shock protein 60 (Cpn60)	64.159	27.6	0	103.05	1	1	1.09123	0.0379182	0.0157589	1.80247	+	24.4	11	10	1.08653	0.0360423	18.978	8	27.6	13	12	1.0642	0.0270233	9.6838	9	25.4	12	11	1.1238	0.050689	13.628	14
	1330	Tb927.4.1270	Tb927.4.1270		ruvB-like DNA helicase, putative	49.905	19.2	0	66.006	1		1.09014	0.0374814	0.00359944	2.44377	+	15.7	5	5	1.08259	0.0344644	30.422	5	18.7	5	5	1.1063	0.0438729	15.362	5	19.2	6	6	1.0817	0.0341068	33.528	6
	539	Tb927.10.4850	Tb927.10.4850		hypothetical protein, conserved	51.34	25.2	0	107.55	1	1	1.09002	0.037435	0.0267758	1.57226	+	22.7	7	7	1.08178	0.0341401	20.175	6	25.2	8	8	1.0561	0.023705	17.49	8	25.2	8	8	1.1336	0.0544598	24.416	7
	265	Tb927.1.3880	Tb927.1.3880		hypothetical protein, conserved	188.01	5.1	0	61.739	1		1.08831	0.0367532	0.0394816	1.40361	+	5	8	8	1.04623	0.0196284	16.713	15	5	8	8	1.0799	0.0333835	28.342	11	4.3	7	7	1.1409	0.0572476	43.958	16
	479	Tb927.10.2350	Tb927.10.2350		pyruvate dehydrogenase complex E3 binding protein, putative	27.335	17.3	0	79.812	1	1	1.08822	0.0367183	0.0195717	1.70837	+	17.3	4	4	1.08764	0.0364861	5.5231	4	17.3	4	4	1.0565	0.0238695	19.258	4	17.3	4	4	1.1215	0.0497993	13.908	5
	1591	Tb927.6.3090	Tb927.6.3090		hypothetical protein, conserved	179.07	12.2	0	73.312	1		1.08776	0.0365332	0.0305548	1.51492	+	8.6	12	12	1.07974	0.0333187	26.058	12	9.9	13	13	1.0519	0.0219745	33.685	16	6.7	9	9	1.1332	0.0543066	34.445	11
	389	Tb927.10.1470;Tb927.10.1400	Tb927.10.1470;Tb927.10.1400	HGPRT	hypoxanthine-guanine phosphoribosyltransferase (HGPRT) ;hypoxanthine-guanine phosphoribosyltransferase (HGPRT)	23.372	22.4	0	7.9498	2		1.08574	0.0357255	0.0257643	1.58898	+	22.4	4	4	1.11874	0.0487305	70.037	4	22.4	4	4	1.0928	0.0385407	41.225	4	22.4	3	3	1.0469	0.0199052	55.284	3
	780	Tb927.11.13610	Tb927.11.13610		hypothetical protein, conserved	15.688	53.3	0	113.88	1		1.08572	0.0357181	0.0146494	1.83418	+	53.3	7	7	1.06374	0.0268352	16.809	14	53.3	7	7	1.0778	0.0325382	11.589	15	53.3	7	7	1.1163	0.0477809	14.099	16
	1282	Tb927.3.4610	Tb927.3.4610		hypothetical protein, conserved	330.3	0.6	0.001998	2.9055	1		1.08449	0.0352273	0.024143	1.61721	+	0.3	1	1	1.1227	0.0502637	NaN	1	0.6	2	2	1.0539	0.0227994	2.5005	2	0.3	1	1	1.078	0.0326188	7.6745	3
	1158	Tb927.2.4130	Tb927.2.4130		enoyl-CoA hydratase/Enoyl-CoA isomerase/3-hydroxyacyl-CoA dehydrogenase, putative	88.9	16.9	0	55.723	1		1.07989	0.033379	0.0420431	1.3763	+	15.4	9	9	1.06811	0.0286174	27.986	15	16.9	10	10	1.0431	0.0183259	12.911	17	16.9	10	10	1.1303	0.0531937	10.459	14
	268	Tb927.1.4050	Tb927.1.4050		protein phosphatase with EF-Hand domains (PPEF),ser/thr protein phosphatase, putative	105.75	27.2	0	151.85	1		1.0797	0.0333012	0.0283683	1.54717	+	23.5	20	20	1.09636	0.0399528	14.421	26	27.2	21	21	1.0395	0.0168245	15.5	29	23.5	20	20	1.1044	0.0431264	13.583	36
	1881	Tb927.8.2740	Tb927.8.2740	TbRBP38	mitochondrial RNA binding protein (TbRBP38)	38.497	46.7	0	121.16	1	1	1.07913	0.0330729	0.0146138	1.83524	+	46.2	13	13	1.09465	0.0392772	12.446	15	46.2	13	13	1.0508	0.0215201	9.4646	17	39.9	13	13	1.0925	0.0384214	17.612	16
	769	Tb927.11.13280	Tb927.11.13280	GBP25	mitochondrial RNA binding protein 2 (GBP25)	25.106	52.7	0	200	1	1	1.07854	0.0328362	0.0316914	1.49906	+	48.7	11	11	1.05222	0.0221073	19.616	17	52.7	11	11	1.0626	0.0263698	8.8715	18	52.7	12	12	1.1221	0.0500316	11.373	22
	862	Tb927.11.16730	Tb927.11.16730	GCVL-2	dihydrolipoyl dehydrogenase (GCVL-2)	50.433	43.4	0	310.19	1	1	1.07818	0.0326895	0.0415197	1.38175	+	43.4	18	18	1.03616	0.0154277	16.142	22	42.3	17	17	1.0774	0.032377	11.595	26	43.4	18	18	1.1227	0.0502637	20.054	26
	684	Tb927.11.10140	Tb927.11.10140		hypothetical protein, conserved	30.3	65.4	0	127.88	1	1	1.07752	0.032424	0.0454006	1.34294	+	58	16	16	1.06315	0.026595	16.707	41	59.9	16	16	1.042	0.0178677	13.202	43	65.4	18	18	1.1293	0.0528093	11.675	51
	503	Tb927.10.3200	Tb927.10.3200	U2AF35	U2 splicing auxiliary factor, putative (U2AF35)	29.114	14.6	0	16.696	1		1.07749	0.0324127	0.0142851	1.84512	+	9.7	2	2	1.0516	0.0218515	1.3548	3	14.6	3	3	1.0826	0.034468	5.7352	4	11.3	2	2	1.0988	0.0409187	5.2635	4
	274	Tb927.1.450	Tb927.1.450		retrotransposon hot spot protein (RHS, pseudogene), putative	229.01	5.4	0	38.972	1		1.07582	0.0317414	0.029838	1.52523	+	5.4	9	1	1.044	0.0187025	NaN	1	5.4	9	1	1.1134	0.0466512	NaN	1	5.4	9	1	1.0712	0.0298706	NaN	1
	1586	Tb927.6.2790;REV__Tb927.6.2790	Tb927.6.2790		L-threonine 3-dehydrogenase, putative	36.957	37.3	0	223.67	2	1	1.07464	0.031264	0.0364118	1.43876	+	37.3	10	10	1.03168	0.0135463	13.401	9	34	9	9	1.0918	0.0381431	5.915	9	31.6	8	8	1.1018	0.0421028	4.5627	8
	1068	Tb927.11.7900	Tb927.11.7900	RBP16	mitochondrial RNA binding protein,RBP16,RNA- binding protein of 16 kDa (RBP16)	15.118	78.7	0	253.69	1	1	1.07389	0.0309609	0.0391494	1.40727	+	78.7	14	14	1.04073	0.0173399	12.495	44	69.5	12	12	1.0642	0.0270233	11.244	50	78.7	13	13	1.1182	0.0485195	12.446	46
	379	Tb927.10.13720	Tb927.10.13720	RBP29	RNA-binding protein, putative (RBP29)	40.678	16.4	0	14.496	1		1.06963	0.029233	0.0104127	1.98244	+	14.1	5	5	1.062	0.0261243	24.778	7	13	5	5	1.0565	0.0238695	21.982	6	10.6	4	4	1.0907	0.0377053	27.651	8
	328	Tb927.10.11870	Tb927.10.11870	MRB11870	mitochondrial RNA binding protein (MRB11870)	34.683	13.9	0	21.383	1	1	1.06955	0.0292016	0.0088406	2.05352	+	13.9	3	3	1.08742	0.0363963	8.2845	3	13.9	3	3	1.0675	0.0283679	10.268	3	13.9	3	3	1.054	0.0228406	12.255	4
	351	Tb927.10.12500;Tb927.10.12510	Tb927.10.12500;Tb927.10.12510		P-type H -ATPase, putative ;P-type H -ATPase, putative	100.23	18.1	0	118.27	2		1.06603	0.0277675	0.0093234	2.03043	+	13.6	11	11	1.04753	0.0201649	11.24	15	16.7	13	13	1.0729	0.0305592	29.538	25	14.3	11	11	1.0779	0.0325785	23.312	14
	2041	Tb927.9.11600;Tb927.9.11580	Tb927.9.11600;Tb927.9.11580	gim5B	unspecified product (gim5B) ;Gim5A protein,glycosomal membrane protein (gim5A)	25.975	33.6	0	111.44	2		1.06566	0.0276201	0.0488005	1.31158	+	33.6	7	7	1.02827	0.0121059	17.934	10	33.6	7	7	1.1075	0.0443437	9.5915	17	26.6	6	6	1.0627	0.0264107	17.456	12
	1190	Tb927.2.5850	Tb927.2.5850	Sm-D2	small nuclear ribonucleoprotein SmD2 (Sm-D2)	12.518	31.5	0	22.994	1		1.06532	0.0274809	0.0261189	1.58304	+	22.5	2	2	1.09739	0.0403625	41.382	3	31.5	3	3	1.0544	0.0230054	18.552	3	31.5	3	3	1.0449	0.0190747	11.053	3
	1650	Tb927.6.600	Tb927.6.600	CAF1	CCR4 associated factor, putative (CAF1)	38.863	16	0	73.934	1		1.06486	0.0272913	0.029703	1.5272	+	16	4	4	1.0401	0.0170733	10.846	4	16	4	4	1.0573	0.0241982	16.24	4	16	4	4	1.098	0.0406023	12.229	4
	1438	Tb927.5.1490	Tb927.5.1490		eukaryotic initiation factor 4a, putative	122.1	4.6	0	12.418	1		1.06391	0.0269033	0.0417415	1.37943	+	4.6	4	4	1.05609	0.0237005	29.26	5	4.6	4	4	1.0337	0.0143945	22.864	5	3.5	3	3	1.1031	0.0426149	19.771	4
	139	Tb927.10.5300;Tb11.v5.0246	Tb927.10.5300;Tb11.v5.0246		eukaryotic translation initiation factor 6 (eIF-6), putative ;eukaryotic translation initiation factor 6, putative	26.925	38.7	0	117.7	2		1.0639	0.0269003	0.018447	1.73408	+	35.5	5	5	1.04798	0.0203515	9.5033	6	38.7	6	6	1.0542	0.022923	7.2096	6	35.5	5	5	1.09	0.0374265	10.885	6
	1705	Tb927.7.280	Tb927.7.280	PPIase	cyclophilin-type peptidyl-prolyl cis-trans isomerase, putative (PPIase)	24.302	64.9	0	65.35	1	1	1.0637	0.026821	0.00983481	2.00723	+	60.9	10	10	1.04666	0.0198057	13.418	12	64.9	11	11	1.0659	0.0277165	10.555	14	60.9	10	10	1.0788	0.0329409	9.5584	13
	1843	Tb927.8.1570	Tb927.8.1570		hypothetical protein, conserved	28.825	22.8	0	51.092	1		1.06352	0.0267462	0.0464644	1.33288	+	22.8	4	4	1.10497	0.0433514	3.2532	3	22.8	4	4	1.0316	0.0135113	10.458	3	22.8	4	4	1.0553	0.0233759	29.744	3
	248	Tb927.1.2400;Tb927.1.2380;Tb927.1.2360;Tb927.1.2340;Tb11.v5.0468	Tb927.1.2400;Tb927.1.2380;Tb927.1.2360;Tb927.1.2340;Tb11.v5.0468		alpha tubulin ;alpha tubulin ;alpha tubulin ;alpha tubulin ;alpha tubulin, putative	49.787	51.9	0	323.31	5		1.06255	0.0263486	0.0291864	1.53482	+	48.6	14	14	1.07609	0.0318487	17.388	29	51.9	17	17	1.0306	0.0130901	19.839	40	51.7	15	15	1.0817	0.0341068	61.316	27
	2221	Tb927.9.9630	Tb927.9.9630		hypothetical protein, conserved	38.92	18.3	0	27.09	1		1.06241	0.0262914	0.0350284	1.45558	+	18.3	6	6	1.07463	0.0312603	9.0144	4	18.3	6	6	1.0859	0.0357898	6.759	5	18.3	6	6	1.0276	0.0118241	16.114	5
	860	Tb927.11.1670	Tb927.11.1670		cysteine desulfurase	48.151	10.5	0	43.025	1	1	1.06235	0.0262667	0.0406834	1.39058	+	8.7	2	2	1.10003	0.0414027	16.839	2	10.5	3	3	1.0547	0.0231289	10.431	3	10.5	3	3	1.0334	0.0142685	37.223	4
	523	Tb927.10.4000	Tb927.10.4000		methylglutaconyl-CoA hydratase, mitochondrial precursor, putative	29.195	58.8	0	233.65	1	1	1.06195	0.026106	0.0327987	1.48414	+	58.8	15	15	1.04241	0.0180365	16.127	28	58.8	15	15	1.0475	0.020154	76.767	33	58.8	15	15	1.0968	0.0401274	16.147	44
	572	Tb927.10.6020	Tb927.10.6020		hypothetical protein, conserved	18.564	6.7	0	12.599	1		1.05975	0.0252028	0.00890777	2.05023	+	6.7	1	1	1.05524	0.023352	6.002	2	6.7	1	1	1.0482	0.0204442	6.8931	2	6.7	1	1	1.076	0.0318123	4.7134	2
	1488	Tb927.5.3190	Tb927.5.3190		hypothetical protein, conserved	23.192	16.3	0	6.9634	1		1.056	0.0236635	0.00679811	2.16761	+	9.6	2	2	1.06593	0.0277277	7.5	3	16.3	3	3	1.0431	0.0183259	17.184	3	16.3	3	3	1.0591	0.024937	13.426	5
	173	Tb927.1.2390;Tb927.1.2370;Tb927.1.2350;Tb927.1.2330;Tb11.v5.0469;Tb927.1.2410	Tb927.1.2390;Tb927.1.2370;Tb927.1.2350;Tb927.1.2330;Tb11.v5.0469;Tb927.1.2410		beta tubulin ;beta tubulin ;beta tubulin ;beta tubulin ;beta tubulin, putative ;beta tubulin, pseudogene	49.704	48.4	0	239.26	6		1.05215	0.0220785	0.0290617	1.53668	+	48.4	17	17	1.04908	0.0208069	20.079	42	48.4	17	17	1.0307	0.0131323	18.261	47	48.4	17	17	1.0772	0.0322963	46.124	59
	956	Tb927.11.4160	Tb927.11.4160		predicted C2 domain protein	136.31	3.7	0	18.387	1		1.04831	0.0204898	0.0264941	1.57685	+	2.8	3	3	1.05783	0.0244166	15.411	5	3.7	4	4	1.0625	0.0263289	28.072	6	3.7	4	4	1.025	0.0107239	29.421	6
	1669	Tb927.7.1340;Tb927.7.1320	Tb927.7.1340;Tb927.7.1320	HSP10	10 kDa heat shock protein, putative (HSP10) ;10 kDa heat shock protein, putative (HSP10)	10.67	69	0	103.16	2		1.04818	0.0204355	0.0489566	1.31019	+	49	6	6	1.04064	0.0172992	16.751	14	49	6	6	1.0806	0.033665	16.767	12	69	7	7	1.0241	0.0103424	18.899	14
	1187	Tb927.2.5760	Tb927.2.5760		hypothetical protein, conserved	330.07	10.2	0	161.02	1		1.04385	0.0186369	0.0202806	1.69292	+	9.3	13	13	1.04029	0.0171546	25.012	13	8.2	12	12	1.0299	0.0127951	25.36	11	7.6	11	11	1.0616	0.0259609	14.056	12
	470	Tb927.10.2060	Tb927.10.2060		hypothetical protein, conserved	107.88	3	0	7.3902	1		1.03572	0.0152424	0.0467003	1.33068	+	2.1	1	1	1.01577	0.00679751	NaN	1	3	2	2	1.0346	0.0147725	36.466	2	3	2	2	1.0572	0.0241572	0.27475	2
	1167	Tb927.2.4550	Tb927.2.4550		FtsJ cell division protein, putative	102.88	9.5	0	16.258	1		1.02485	0.0106589	0.044095	1.35561	+	8.7	7	7	1.03653	0.0155807	92.964	7	6.4	6	6	1.0096	0.00414934	112.62	11	8	7	7	1.0286	0.0122465	117.82	11
	1868	Tb927.8.2290	Tb927.8.2290		hypothetical protein, conserved	23.428	14.6	0	6.7138	1		1.01375	0.00593048	0.030944	1.50942	+	0	0	0				0	4.1	1	1	1.0151	0.00650883	NaN	1	14.6	2	2	1.0124	0.00535214	3.6716	2
	213	Tb927.8.2470;Tb11.v5.0799	Tb927.8.2470;Tb11.v5.0799		hypothetical protein, conserved ;hypothetical protein, conserved	11.223	28.7	0	53.183	2	1	0.946457	-0.0238993	0.0296766	1.52759	+	26.6	2	2	0.934492	-0.0294244	15.72	2	26.6	2	2	0.97337	-0.011722	14.537	2	28.7	3	3	0.93207	-0.0305515	15.712	3
	2149	Tb927.9.4900	Tb927.9.4900		condensin subunit 1, putative	141.11	2.1	0	13.459	1		0.910938	-0.0405113	0.0469118	1.32872	+	2.1	2	2				0	2.1	2	2	0.89841	-0.0465254	34.746	2	2.1	2	2	0.92364	-0.0344973	19.249	3
	1797	Tb927.7.6630	Tb927.7.6630		hypothetical protein, conserved	89.761	3	0	16.791	1		0.857088	-0.0669744	0.0420581	1.37615	+	1.7	1	1	0.924044	-0.0343075	23.238	3	3	2	2	0.78434	-0.105496	11.93	3	3	2	2	0.86872	-0.0611202	40.862	3
	1081	Tb927.11.840.1;Tb927.11.840.2	Tb927.11.840.1;Tb927.11.840.2		unspecified product ;unspecified product	81.676	1.6	0.0060804	2.2082	2		0.828111	-0.0819115	0.0444012	1.35261	+	1.6	1	1	0.897666	-0.0468852	NaN	1	1.6	1	1	0.8596	-0.0657036	NaN	1	1.6	1	1	0.73596	-0.133146	NaN	1
	597	Tb927.10.720	Tb927.10.720		hypothetical protein, conserved	118.09	7.3	0	18.745	1		0.807245	-0.0929947	0.025362	1.59582	+	6.3	5	5	0.848969	-0.0711084	30.457	3	4.2	3	3	0.84856	-0.0713174	31.48	2	4.5	4	4	0.7302	-0.136558	33.164	3
	2167	Tb927.9.6130	Tb927.9.6130		calmodulin, putative	17.842	8.9	0	15.317	1		0.77135	-0.112749	0.0242413	1.61544	+	8.9	1	1	0.786782	-0.104146	NaN	1	8.9	1	1	0.75622	-0.121352	NaN	1	0	0	0				0
	2002	Tb927.8.7570	Tb927.8.7570		tRNA-dihydrouridine synthase 1, putative	58.145	3.7	0.0043186	2.4505	1		0.768169	-0.114543	0.0376763	1.42393	+	3.7	1	1	0.792644	-0.100922	NaN	1	0	0	0				0	3.7	1	1	0.74445	-0.128164	NaN	1
	1103	Tb927.11.9510	Tb927.11.9510		nucleic acid binding protein, putative	56.606	2.3	0	6.388	1		0.672388	-0.17238	0.0316542	1.49957	+	2.3	1	1	0.735943	-0.133156	NaN	1	2.3	1	1	0.54547	-0.263229	NaN	1	2.3	1	1	0.75726	-0.120755	NaN	1
	1495	Tb927.5.3360	Tb927.5.3360		50S ribosomal protein L2, putative	46.727	3.4	0.003403	2.5697	1	1	2.28902	0.35965	0.0502548	1.29882		3.4	1	1	1.43738	0.157572	NaN	1	3.4	1	1	2.1756	0.337579	NaN	1	3.4	1	1	3.8353	0.583799	83.214	2
	190	Tb11.v5.0624;Tb927.6.160;Tb927.4.200	Tb11.v5.0624		retrotransposon hot spot protein (PHS), putative	62.492	25	0	203.84	3		1.18388	0.0733072	0.0503204	1.29826		25	11	1	1.28896	0.110239	24.141	3	25	11	1	1.2149	0.0845405	45.053	4	23	10	1	1.0596	0.0251419	20.849	3
	1436	Tb927.5.1370	Tb927.5.1370	PPIase	cyclophilin-type peptidyl-prolyl cis-trans isomerase, putative,PPIase, putative,rotamase, putative,cyclosporin A-binding protein, putative,peptidyl-prolyl cis-trans isomerase, putative (PPIase)	25.562	32.1	0	105.32	1	1	1.13418	0.0546806	0.0505994	1.29585		22.8	4	4	1.08904	0.0370438	7.146	5	26.6	5	5	1.083	0.0346285	1.9779	5	28.3	5	5	1.237	0.0923697	9.9	6
	1226	Tb927.3.2180	Tb927.3.2180		hypothetical protein, conserved	17.908	25.6	0	54.919	1	1	1.24466	0.0950512	0.0508117	1.29404		25.6	3	3	1.15883	0.0640194	3.3786	5	25.6	3	3	1.1492	0.0603956	16.59	8	21.2	2	2	1.4479	0.160739	12.675	5
	1463	Tb927.5.2320	Tb927.5.2320		hypothetical protein, conserved	82.159	5.6	0	6.4184	1		1.12885	0.0526352	0.050894	1.29333		5.6	3	3	1.05181	0.0219382	8.8741	3	5.6	3	3	1.1246	0.0509981	21.241	3	5.6	3	3	1.2161	0.0849693	21.911	3
	552	Tb927.10.5400	Tb927.10.5400		hypothetical protein, conserved	63.396	6.8	0	3.7284	1		1.1957	0.077622	0.0511031	1.29155		6.8	2	2	1.23709	0.0924006	1.1056	2	2.6	1	1	1.0602	0.0253878	NaN	1	6.8	2	2	1.3034	0.115078	23.686	2
	1984	Tb927.8.6640	Tb927.8.6640		hypothetical protein, conserved	67.498	3	0	3.9404	1		0.819251	-0.0865833	0.0513759	1.28924		3	1	1	0.793084	-0.100681	NaN	1	3	1	1	0.84628	-0.0724859	NaN	1	0	0	0				0
	192	Tb11.v5.0629;Tb927.3.4500	Tb11.v5.0629;Tb927.3.4500		fumarate hydratase, putative ;fumarate hydratase, class I (FHc)	50.088	2.4	0.0029383	2.6846	2		1.2295	0.0897297	0.0514147	1.28891		0	0	0				0	2.4	1	1	1.1888	0.0751088	2.0906	2	2.4	1	1	1.2716	0.104351	NaN	1
	1375	Tb927.4.3160	Tb927.4.3160	DAT	dihydroxyacetone phosphate acyltransferase, putative (DAT)	137.14	11.4	0	44.906	1		1.03486	0.0148799	0.0516652	1.2868		9.4	10	10	1.04371	0.0185801	45.307	19	9.4	10	10	1.0107	0.00462227	19.479	19	10.4	12	12	1.0506	0.0214374	18.052	23
	1409	Tb927.8.7390;Tb927.4.5030	Tb927.8.7390;Tb927.4.5030		protein phosphatase 1,PP1 ;protein phosphatase 1 (PP1)	39.294	3.2	0.001996	2.8986	2		1.09995	0.0413736	0.052094	1.28321		3.2	1	1	1.05658	0.0239023	NaN	1	3.2	1	1	1.0716	0.0300327	NaN	1	3.2	1	1	1.1754	0.0701857	NaN	1
	2155	Tb927.9.5280	Tb927.9.5280		unspecified product	31.896	17.9	0	28.683	1	1	1.60633	0.205833	0.0521127	1.28306		9.9	2	2	1.15378	0.0621212	28.793	2	17.9	4	4	1.9512	0.290302	28.747	3	17.9	4	4	1.8411	0.265077	47.379	3
	1806	Tb927.7.6990	Tb927.7.6990		hypothetical protein, conserved	32.721	30	0	68.13	1	1	1.21294	0.0838397	0.0521449	1.28279		24.7	7	7	1.17171	0.0688219	43.732	12	24.7	7	7	1.1017	0.0420633	10.279	10	30	8	8	1.3824	0.140634	8.3186	11
	202	Tb11.v5.0687;Tb927.9.8200	Tb11.v5.0687;Tb927.9.8200		hypothetical protein, conserved ;hypothetical protein, conserved	66.328	3.8	0	5.7247	2		1.18379	0.0732758	0.0526433	1.27866		3.8	2	2	1.05094	0.0215775	0.74654	2	3.8	2	2	1.2518	0.0975349	34.826	2	3.8	2	2	1.261	0.100715	35.378	2
	1782	Tb927.7.5830	Tb927.7.5830		hypothetical protein, conserved	11.775	9.4	0.0052257	2.3813	1		1.2809	0.107514	0.0526735	1.27841		9.4	1	1	1.35062	0.130534	NaN	1	9.4	1	1	1.0798	0.0333433	NaN	1	9.4	1	1	1.441	0.158664	NaN	1
	1423	Tb927.4.830	Tb927.4.830		hypothetical protein, conserved	11.341	24	0	6.2493	1		1.05878	0.0248053	0.0527428	1.27784		24	2	2	1.09003	0.0374365	15.288	3	24	2	2	1.0185	0.00796103	17.295	3	24	2	2	1.0691	0.0290183	10.514	3
	370	Tb927.10.13280	Tb927.10.13280		hypothetical protein, conserved	286.2	7.1	0	179.25	1		1.19123	0.0759949	0.0528909	1.27662		6	13	13	1.05446	0.0230314	17.392	12	6.6	15	15	1.2425	0.0942964	23.08	14	5.1	12	12	1.2902	0.110657	17.271	11
	1485	Tb927.5.3110	Tb927.5.3110		hypothetical protein, conserved	24.469	30.3	0	18.956	1	1	1.4026	0.146935	0.0534412	1.27212		30.3	4	4	1.3621	0.134209	13.526	4	30.3	4	4	1.157	0.0633334	21.69	3	30.3	4	4	1.7509	0.243261	58.806	3
	1509	Tb927.5.3870	Tb927.5.3870		hypothetical protein, conserved	82.035	2.5	0.0052059	2.3426	1	1	1.12112	0.0496537	0.0536784	1.2702		2.5	1	1	1.04679	0.0198602	NaN	1	2.5	1	1	1.1166	0.0478976	NaN	1	2.5	1	1	1.2056	0.0812032	NaN	1
	1523	Tb927.5.530	Tb927.5.530		hypothetical protein, conserved	71.4	4.8	0	8.9107	1	1	1.26545	0.102245	0.054038	1.2673		3.5	2	2	1.28266	0.108111	20.77	3	4.8	3	3	1.0865	0.0360297	17.308	9	4.8	3	3	1.4541	0.162594	7.3445	5
	1408	Tb927.8.7400;Tb927.4.5020;Tb11.v5.0504	Tb927.8.7400;Tb927.4.5020;Tb11.v5.0504	RPB1	RNA polymerase IIA largest subunit (RPB1) ;RNA polymerase IIA largest subunit (RPB1) ;RNA polymerase IIA largest subunit, putative	196.73	2.4	0	8.6385	3		1.18098	0.0722439	0.054135	1.26652		2.4	4	4	1.26525	0.102175	38.536	4	2.4	4	4	1.0486	0.0206099	23.37	3	2.4	4	4	1.2415	0.0939467	60.496	5
	1522	Tb927.5.520	Tb927.5.520		stomatin-like protein, putative	55.979	24.9	0	146.09	1	1	1.13618	0.0554469	0.0542112	1.26591		22.8	10	10	1.20191	0.0798715	117.24	16	24.9	11	11	1.0375	0.0159881	109.83	20	24.9	11	11	1.1762	0.0704812	24.427	18
	1456	Tb927.5.2070	Tb927.5.2070		hypothetical protein, conserved	68.756	3.6	0	7.3996	1	1	1.9071	0.280374	0.0547932	1.26127		2.2	1	1	1.47252	0.16806	NaN	1	3.6	2	2	3.0384	0.482645	92.616	2	2.2	1	1	1.5503	0.190416	46.921	2
	376	Tb927.10.13510	Tb927.10.13510		zinc metallopeptidase, putative	62.779	7	0	31.601	1	1	1.27867	0.106758	0.0548916	1.26049		5.8	2	2	1.08797	0.0366183	22.054	4	7	3	3	1.2995	0.113776	40.676	3	5.8	2	2	1.4787	0.16988	NaN	1
	1642	Tb927.6.5060	Tb927.6.5060		hypothetical protein, conserved	17.156	21.9	0	24.61	1		1.26478	0.102016	0.0554605	1.25602		21.9	2	2	1.32238	0.121358	18.846	2	9.9	1	1	1.0721	0.0302353	NaN	1	9.9	1	1	1.4271	0.154454	NaN	1
	1505	Tb927.5.3710	Tb927.5.3710	TbnSMase	essential neutral sphingomyelinase (TbnSMase)	65.019	2.6	0	4.5409	1		0.646724	-0.189281	0.0556432	1.25459		2.6	1	1	0.493876	-0.306382	NaN	1	2.6	1	1	0.85635	-0.0673487	NaN	1	2.6	1	1	0.63957	-0.194112	NaN	1
	1460	Tb927.5.2150	Tb927.5.2150		hypothetical protein, conserved	60.078	5.7	0	5.3642	1	1	1.46064	0.164544	0.0557048	1.25411		3.4	1	1	1.56184	0.193637	NaN	1	5.7	2	2	1.366	0.135451	104.66	2	0	0	0				0
	1667	Tb927.7.1170	Tb927.7.1170	Y14	RNA-binding protein, putative (Y14)	17.943	5.7	0.0015038	2.931	1		1.13876	0.0564315	0.0561843	1.25039		5.7	1	1	1.14054	0.0571094	51.276	2	5.7	1	1	1.2358	0.0919482	NaN	1	5.7	1	1	1.0477	0.0202369	NaN	1
	1571	Tb927.6.2230	Tb927.6.2230		RGG protein	86.64	37.9	0	268.27	1	1	1.07573	0.0317034	0.0562263	1.25006		37.9	31	31	1.0846	0.0352691	18.674	57	37.3	29	29	1.0233	0.010003	16.299	59	36.3	28	28	1.1216	0.049838	17.444	53
	157	Tb927.10.5060;Tb11.v5.0341	Tb927.10.5060;Tb11.v5.0341		hypothetical protein, conserved ;hypothetical protein, conserved	21.332	8.5	0.0024789	2.8287	2	1	1.70468	0.231643	0.0562493	1.24988		8.5	2	2	1.15942	0.0642409	71.121	3	8.5	2	2	1.9465	0.289254	8.535	2	8.5	2	2	2.195	0.341435	0.13147	2
	1287	Tb927.3.4850	Tb927.3.4850		enoyl-CoA hydratase, mitochondrial precursor, putative	28.605	31.8	0	48.89	1	1	1.1187	0.0487118	0.0565375	1.24766		28.5	6	6	1.03004	0.0128523	13.945	6	28.5	6	6	1.1632	0.0656544	8.2529	6	31.8	7	7	1.1685	0.0676287	14.602	7
	998	Tb927.11.540	Tb927.11.540	ABCB10	ABC transporter, putative (ABCB10)	76.244	6.1	0	14.671	1		1.36098	0.133851	0.0568098	1.24558		6.1	2	2	1.35051	0.130498	17.831	2	6.1	2	2	1.1219	0.0499541	11.858	2	6.1	2	2	1.6638	0.221101	28.919	2
	113	Tb927.10.1160;Tb11.0550	Tb927.10.1160;Tb11.0550		hypothetical protein, conserved ;chrX additional, unordered contigs,hypothetical protein, conserved	17.503	14.2	0	12.995	2	1	1.44048	0.158506	0.0572338	1.24235		14.2	2	2	1.16914	0.0678663	40.216	2	14.2	2	2	1.377	0.138934	15.826	2	14.2	2	2	1.8566	0.268718	19.955	2
	1459	Tb927.5.2140	Tb927.5.2140		regulator of nonsense transcripts UPF1	93.324	3.8	0	10.956	1		1.22585	0.0884368	0.0572483	1.24224		3.8	3	3	1.0675	0.028367	33.701	3	3.8	3	3	1.2462	0.0955877	36.837	5	3.8	2	2	1.3847	0.141356	52.373	2
	2168	Tb927.9.6170;Tb927.9.6290;Tb927.9.6230	Tb927.9.6170;Tb927.9.6290;Tb927.9.6230	AK	arginine kinase (AK) ;arginine kinase (AK) ;unspecified product (AK)	44.716	31.4	0	85.969	3		1.0614	0.0258777	0.0583696	1.23381		21.3	7	7	1.04289	0.0182403	15.67	8	31.4	11	11	1.0333	0.0142264	13.176	8	27.5	10	10	1.1096	0.0451664	13.35	11
	485	Tb927.10.2550	Tb927.10.2550		malate dehydrogenase-related	38.998	20.2	0	21.214	1	1	1.23198	0.090603	0.0585295	1.23263		15.4	4	4	1.0558	0.0235812	11.434	6	20.2	5	5	1.2987	0.113509	15.875	5	14	4	4	1.3637	0.134719	18.556	4
	808	Tb927.11.14750	Tb927.11.14750		hypothetical protein, conserved	42.2	3	0	3.8995	1		1.22899	0.0895487	0.0586775	1.23153		3	1	1	1.12218	0.0500638	NaN	1	3	1	1	1.1533	0.0619423	NaN	1	3	1	1	1.4343	0.15664	NaN	1
	1362	Tb927.4.2540	Tb927.4.2540		ubiquitin, putative	8.668	21.8	0	99.353	1		0.920186	-0.0361246	0.058871	1.2301		21.8	1	1	0.86949	-0.0607356	5.7336	2	21.8	1	1	0.96902	-0.0136673	NaN	1	21.8	1	1	0.92476	-0.033971	NaN	1
	584	Tb927.10.6610	Tb927.10.6610		chaperone protein DNAj, putative	31.198	8.8	0	17.433	1		1.14666	0.0594335	0.0589193	1.22974		8.8	2	2	1.2166	0.0851493	28.729	2	8.8	2	2	1.0345	0.0147305	18.109	2	8.8	2	2	1.1979	0.0784206	10.949	2
	1969	Tb927.8.6110	Tb927.8.6110		hypothetical protein, conserved	54.669	24.6	0	149.4	1	1	1.09443	0.0391871	0.0590937	1.22846		23	10	10	1.02327	0.00998988	18.445	11	23.2	10	10	1.1204	0.0493731	12.797	10	24.6	11	11	1.1434	0.0581982	14.266	11
	2036	Tb927.9.11280	Tb927.9.11280		unspecified product	35.601	8.5	0	7.8867	1		2.21688	0.345743	0.0591224	1.22825		3.9	1	1	1.90887	0.280776	NaN	1	4.6	1	1	2.5746	0.41071	NaN	1	0	0	0				0
	1110	Tb927.11.9670	Tb927.11.9670	GCVT1	glycine synthase, putative (GCVT1)	41.142	65.1	0	188.63	1	1	1.06196	0.026108	0.0591814	1.22781		63.2	19	19	1.04184	0.0178012	20.514	26	58.7	18	18	1.0345	0.0147305	18.271	28	60.8	19	19	1.1112	0.0457922	23.969	23
	1661	Tb927.7.1030	Tb927.7.1030	HSP70	heat shock 70 kDa protein, putative (HSP70)	93.231	10.8	0	22.267	1	1	1.20246	0.0800692	0.0598093	1.22323		10.8	7	7	1.36457	0.134997	24.217	8	9.4	6	6	1.0706	0.0296272	13.506	6	10.8	7	7	1.1901	0.0755835	27.783	8
	1998	Tb927.8.7490;Tb927.4.4930	Tb927.8.7490;Tb927.4.4930		hypothetical protein, conserved ;hypothetical protein, conserved	157.97	3.4	0	12.288	2		1.15954	0.0642839	0.0598683	1.2228		2.3	2	2	1.05674	0.0239666	1.6602	2	0.8	1	1	1.149	0.06032	NaN	1	3.4	3	3	1.284	0.108565	16.946	3
	143	Tb927.11.7250;Tb11.v5.0257	Tb927.11.7250;Tb11.v5.0257		hypothetical protein, conserved ;hypothetical protein, conserved	53.363	3.2	0	12.467	2	1	1.33097	0.124167	0.060162	1.22068		3.2	1	1	1.27432	0.10528	NaN	1	3.2	1	1	1.6375	0.214181	NaN	1	3.2	1	1	1.1299	0.05304	NaN	1
	1909	Tb927.8.3870;Tb11.v5.0681	Tb927.8.3870;Tb11.v5.0681		hypothetical protein, conserved ;hypothetical protein, conserved	127.73	7.7	0	73.231	2		1.0548	0.0231694	0.0603816	1.2191		6.6	8	8	1.03003	0.0128479	28.104	12	7.7	9	9	1.0371	0.0158206	76.801	12	5.8	7	7	1.0986	0.0408396	22.107	11
	2008	Tb927.8.8180;Tb927.4.4150	Tb927.8.8180;Tb927.4.4150	MRB8180	mitochondrial RNA binding complex 1 subunit (MRB8180) ;mitochondrial RNA binding complex 1 subunit (MRB4150)	103.45	25.2	0	48.998	2		1.06209	0.0261607	0.0607251	1.21663		25.2	18	18	1.05808	0.0245176	17.437	33	20.9	16	16	1.0224	0.00962084	12.598	34	17.1	14	14	1.1075	0.0443437	11.237	33
	1342	Tb927.4.1670	Tb927.4.1670		hypothetical protein, conserved	17.389	22.2	0	71.124	1	1	1.31331	0.118366	0.0607908	1.21616		17.6	2	2	1.61904	0.209258	54.909	3	22.2	3	3	1.1695	0.0680002	28.169	5	22.2	3	3	1.1963	0.0778401	28.264	5
	305	Tb927.10.10820	Tb927.10.10820		hypothetical protein, conserved	36.965	38.1	0	175.45	1		1.14848	0.0601235	0.0612712	1.21274		30	7	7	1.07688	0.0321666	12.28	7	32.7	8	8	1.1014	0.0419451	10.131	8	33	8	8	1.2772	0.106259	13.639	8
	263	Tb927.1.3800	Tb927.1.3800		hypothetical protein, conserved	19.907	54.1	0	68.625	1	1	1.09398	0.0390108	0.0613325	1.21231		53.6	10	10	1.10769	0.0444181	110.65	16	54.1	12	12	1.0247	0.0105967	18.918	24	54.1	11	11	1.1535	0.0620176	22.992	24
	1073	Tb927.11.8060	Tb927.11.8060		hypothetical protein, conserved	63.596	7.2	0	34.289	1		1.15866	0.0639569	0.0614267	1.21164		7.2	2	2	1.15441	0.0623618	23.267	2	7.2	2	2	1.0517	0.0218919	8.7756	2	7.2	2	2	1.2812	0.107617	8.459	2
	2184	Tb927.9.7180	Tb927.9.7180		adenosine monophosphate deaminase, putative,AMP deaminase, putative	189.71	1.8	0	4.0201	1		1.117	0.0480536	0.0614761	1.21129		0.5	1	1	1.02527	0.0108395	NaN	1	1.2	2	2	1.1639	0.0659157	2.5798	2	1.2	2	2	1.1679	0.0674057	5.0573	2
	1118	Tb927.11.9930	Tb927.11.9930		NADH-ubiquinone oxidoreductase complex I subunit, putative	30.327	23.4	0	31.227	1	1	1.2062	0.0814199	0.0616748	1.20989		18.8	4	4	1.30422	0.115352	7.0066	6	18.8	4	4	1.043	0.0182843	18.693	5	23.4	5	5	1.2901	0.110623	11.324	8
	159	Tb11.v5.0365;Tb927.11.12880	Tb11.v5.0365;Tb927.11.12880		hypothetical protein, conserved ;hypothetical protein, conserved	82.854	7.1	0	11.87	2		0.857504	-0.0667639	0.0617272	1.20952		5.5	4	1	0.954198	-0.0203613	NaN	1	7.1	6	1	0.85126	-0.0699378	NaN	1	5.4	4	1	0.77626	-0.109993	NaN	1
	1136	Tb927.2.2590	Tb927.2.2590		hypothetical protein, conserved	12.316	30.5	0	10.459	1	1	1.04737	0.0201017	0.0618345	1.20877		30.5	4	4	1.03154	0.013488	25.909	10	30.5	4	4	1.026	0.0111474	17.885	7	30.5	4	4	1.0856	0.0356698	49.831	6
	2140	Tb927.9.4230	Tb927.9.4230	ACS4	fatty acyl CoA synthetase 4 (ACS4)	77.871	40.3	0	56.167	1		0.895569	-0.0479009	0.0618414	1.20872		37	22	1	0.854628	-0.068223	NaN	1	34.3	19	1	0.97563	-0.0107149	NaN	1	38	23	1	0.86146	-0.0647649	NaN	1
	2166	Tb927.9.6060	Tb927.9.6060		2Fe-2S iron-sulfur cluster binding domain containing protein, putative	30.49	47.6	0	108.91	1	1	1.06919	0.029054	0.0619558	1.20792		41.8	13	13	1.07014	0.0294393	9.3965	19	47.6	15	15	1.0216	0.00928088	65.028	20	43.2	12	12	1.118	0.0484418	10.908	20
	1751	Tb927.7.4210	Tb927.7.4210		hypothetical protein, conserved	13.418	9.5	0	11.888	1	1	1.26234	0.101175	0.0619592	1.20789		9.5	1	1	1.49739	0.175334	24.501	3	9.5	1	1	1.0994	0.0411557	NaN	1	9.5	1	1	1.2219	0.0870357	NaN	1
	1744	Tb927.7.4010	Tb927.7.4010		hypothetical protein, conserved	9.0044	39.7	0	15.679	1	1	2.19927	0.342278	0.0619809	1.20774		39.7	2	2	1.88267	0.274775	18.29	4	21.8	1	1				0	17.9	1	1	2.5691	0.409781	2.2816	2
	188	Tb927.7.2570;Tb11.v5.0611	Tb927.7.2570;Tb11.v5.0611		guide RNA associated protein, GAP2 ;hypothetical protein, conserved	52.545	48.2	0	197.3	2	1	1.10144	0.0419596	0.0622347	1.20597		48.2	16	16	1.05617	0.0237326	12.618	19	48.2	17	17	1.0654	0.0275127	11.936	18	42.7	15	15	1.1875	0.0746336	13.201	17
	102	Tb10.v4.0053;Tb10.v4.0052;Tb927.10.10280;Tb927.10.10360	Tb10.v4.0053;Tb10.v4.0052;Tb927.10.10280;Tb927.10.10360		hypothetical protein,chrX additional, unordered contigs ;microtubule-associated protein 2,chrX additional, unordered contigs ;microtubule-associated protein, putative ;microtubule-associated protein, putative	483.8	15.1	0	62.438	4		1.10672	0.044037	0.0622467	1.20588		15.1	7	7	1.03808	0.0162294	23.262	17	5.5	6	6	1.0976	0.0404441	19.572	21	15.1	7	7	1.1897	0.0754375	21.081	22
	282	Tb927.1.530	Tb927.1.530		hypothetical protein, conserved	30.748	4	0	5.893	1		1.12489	0.0511112	0.0624623	1.20438		4	1	1	1.23264	0.0908346	NaN	1	4	1	1	1.065	0.0273496	NaN	1	4	1	1	1.0843	0.0351495	1.804	2
	1099	Tb927.11.9320	Tb927.11.9320		hypothetical protein, conserved	23.715	29.9	0	6.8169	1		1.22183	0.0870092	0.0626919	1.20279		10	1	1	1.30654	0.116123	NaN	1	29.9	3	3	1.3362	0.125871	26.007	3	29.9	3	3	1.0448	0.0190332	62.334	3
	288	Tb927.1.880;Tb11.v5.0418;Tb11.v5.0419	Tb927.1.880		hypothetical protein, conserved	512.6	10.3	0	237.73	3		1.04991	0.021154	0.0628721	1.20154		8.2	34	34	1.0171	0.00736255	23.201	31	8.4	35	35	1.0472	0.0200296	20.168	33	8.3	35	35	1.0866	0.0360697	40.184	31
	1802	Tb927.7.6830;Tb927.7.6850	Tb927.7.6830;Tb927.7.6850		trans-sialidase, putative ;trans-sialidase (TbTS)	47.469	5.9	0	8.2362	2		1.22508	0.0881636	0.0631894	1.19936		5.9	2	2	1.04466	0.0189746	6.3334	2	5.9	2	2	1.3426	0.127947	18.817	2	5.9	2	2	1.3109	0.11757	8.5742	2
	1723	Tb927.7.3430	Tb927.7.3430	PPIase	cyclophilin-type peptidyl-prolyl cis-trans isomerase, putative (PPIase)	25.548	39	0	84.149	1	1	1.19839	0.0785977	0.063198	1.1993		38.5	7	7	1.11809	0.0484779	10.673	7	39	8	8	1.1138	0.0468072	14.3	7	30.3	6	6	1.382	0.140508	13.667	7
	1046	Tb927.11.6740	Tb927.11.6740		pumilio/PUF RNA binding protein 10, putative	75.167	13	0	25.838	1		1.09856	0.0408224	0.0637398	1.19559		11.3	7	7	1.02089	0.00897782	7.3835	7	11.3	7	7	1.127	0.0519239	13.223	7	13	8	8	1.1523	0.0615656	18.942	8
	1527	Tb927.5.680	Tb927.5.680		hypothetical protein, conserved	65.263	7.4	0	28.508	1	1	1.23912	0.0931129	0.0638758	1.19466		7.4	4	4	1.05091	0.0215638	11.649	4	5.5	3	3	1.2975	0.113107	9.424	5	7.4	4	4	1.3953	0.144668	13.843	9
	1321	Tb927.3.820	Tb927.3.820		hypothetical protein, conserved	22.174	5.9	0	3.5984	1	1	1.7502	0.243088	0.0639975	1.19384		5.9	1	1	1.24567	0.0954035	NaN	1	5.9	1	1	1.6194	0.209354	NaN	1	5.9	1	1	2.6577	0.424506	NaN	1
	180	Tb927.10.5620;Tb11.v5.0531	Tb927.10.5620;Tb11.v5.0531	ALD	fructose-bisphosphate aldolase, glycosomal (ALD) ;fructose-bisphosphate aldolase, glycosomal, putative	41.071	79	0	323.31	2		1.06237	0.0262753	0.0645782	1.18991		75.3	32	32	1.03308	0.0141336	15.259	76	77.7	34	34	1.0412	0.0175342	18.818	84	78.8	34	34	1.1147	0.047158	17.217	73
	1949	Tb927.8.5560	Tb927.8.5560		hypothetical protein, conserved	59.988	9.4	0	9.4059	1	1	1.67907	0.225068	0.0647122	1.18901		9.2	4	4	2.09131	0.320418	15.649	4	9.4	5	5	2.0394	0.309502	15.018	3	7.9	3	3	1.1099	0.0452839	53.847	4
	1572	Tb927.6.2320;Tb927.6.2260	Tb927.6.2320;Tb927.6.2260		hypothetical protein, conserved ;hypothetical protein, conserved	20.146	36.2	0	56.662	2		1.08838	0.0367812	0.0647368	1.18885		36.2	5	5	1.12885	0.0526349	21.708	11	36.2	5	5	1.0172	0.00740635	42.012	9	23.9	4	4	1.1228	0.0503024	43.638	7
	774	Tb927.11.13400	Tb927.11.13400		hypothetical protein, conserved	73.634	1.7	0	5.2985	1		1.19609	0.0777625	0.064776	1.18859		1.7	1	1	1.03941	0.0167888	NaN	1	1.7	1	1	1.3148	0.11886	NaN	1	1.7	1	1	1.2521	0.097639	NaN	1
	873	Tb927.11.1890	Tb927.11.1890		hypothetical protein, conserved	36.025	18.1	0	10.438	1		1.14416	0.0584884	0.064842	1.18814		18.1	5	5	1.03621	0.0154457	2.7194	4	18.1	5	5	1.159	0.0640834	8.595	4	8.9	3	3	1.2472	0.0959361	17.633	3
	1361	Tb927.4.2530	Tb927.4.2530		hypothetical protein, conserved	16.835	24.1	0	102.48	1		1.0717	0.0300719	0.0652567	1.18537		24.1	3	3	1.0416	0.0177016	11.476	8	24.1	3	3	1.043	0.0182843	15.106	6	24.1	3	3	1.133	0.0542299	27.253	6
	1079	Tb927.11.8270	Tb927.11.8270		hypothetical protein, conserved	84.474	5.4	0	11.564	1		1.2181	0.0856816	0.0653033	1.18507		5.4	3	3	1.07829	0.0327376	17.282	3	5.4	3	3	1.1858	0.0740114	16.615	3	5.4	3	3	1.4135	0.150296	10.772	3
	904	Tb927.11.2610	Tb927.11.2610		hypothetical protein, conserved	50.887	3.7	0	85.964	1		1.11183	0.046037	0.0653118	1.18501		3.7	2	2	1.02952	0.0126332	11.334	3	3.5	1	1	1.1193	0.0489465	NaN	1	3.7	2	2	1.1927	0.0765312	4.0551	3
	1832	Tb927.8.1230	Tb927.8.1230		hypothetical protein, conserved	19.777	12.6	0	9.8176	1		1.04166	0.0177265	0.0653815	1.18455		12.6	2	2	1.01122	0.00484762	11.625	3	7.1	1	1	1.0702	0.0294649	2.4585	2	12.6	2	2	1.0444	0.0188669	261.18	3
	1641	Tb927.6.5050	Tb927.6.5050		V-type ATPase, C subunit, putative	23.044	10.3	0	12.609	1		1.08032	0.0335513	0.0654649	1.18399		10.3	2	2	1.06441	0.0271078	14.802	2	10.3	2	2	1.0329	0.0140583	5.1154	2	10.3	2	2	1.1468	0.0594877	13.356	2
	1147	Tb927.2.3580	Tb927.2.3580	TFIIS2-1	transcription elongation factor s-II, putative (TFIIS2-1)	52.172	12.2	0	47.877	1		1.05689	0.0240291	0.0656474	1.18278		12.2	4	4	1.09744	0.0403815	21.929	4	12.2	4	4	1.0159	0.00685096	63.213	5	10.1	3	3	1.0589	0.0248549	12.912	5
	1383	Tb927.4.3740	Tb927.4.3740	FAZ1	flagellar attachment zone protein (FAZ1)	192.57	33.5	0	33.225	1		1.13959	0.0567505	0.0656489	1.18277		33	7	7	1.17725	0.0708673	9.1901	7	32.7	7	7	1.028	0.0119931	12.12	7	33	7	7	1.2229	0.0873909	19.297	7
	519	Tb927.10.3790;Tb11.v5.0583;Tb11.v5.0603	Tb927.10.3790		hypothetical protein, conserved	432.89	9.3	0	198.27	3		1.04317	0.018356	0.0657352	1.1822		8.6	30	30	1.00852	0.00368538	20.266	28	8.3	29	29	1.0653	0.0274719	25.042	28	7.7	27	27	1.0566	0.0239106	33.168	25
	1770	Tb927.7.5440	Tb927.7.5440		hypothetical protein, conserved	217.49	3.1	0	12.995	1	1	1.58888	0.201091	0.0657802	1.1819		1.2	2	2	1.32151	0.121071	3.1509	2	1.6	3	3	1.3145	0.118761	15.881	2	2	3	3	2.3091	0.363443	19.331	2
	1905	Tb927.8.3560	Tb927.8.3560	PIF5	DNA repair and recombination helicase protein PIF5 (PIF5)	102.46	8.5	0	23.494	1	1	1.08289	0.0345862	0.0659247	1.18095		8.5	6	6	1.12442	0.0509273	24.037	8	8.5	6	6	1.0157	0.00676545	12.478	7	8.5	6	6	1.1119	0.0460657	34.141	7
	2061	Tb927.9.12750	Tb927.9.12750		hypothetical protein, conserved	38.624	4.4	0	4.4994	1	1	1.26891	0.10343	0.0662577	1.17876		4.4	1	1	1.27364	0.105047	NaN	1	4.4	1	1	1.0715	0.0299922	NaN	1	4.4	1	1	1.4971	0.175251	NaN	1
	1558	Tb927.6.1890	Tb927.6.1890		hypothetical protein, conserved	68.047	7.3	0	5.2501	1	1	1.11133	0.0458423	0.0663538	1.17813		7.3	3	3	1.10552	0.0435674	3.6911	4	7.3	3	3	1.0347	0.0148144	19.742	3	7.3	3	3	1.1999	0.0791451	11.384	3
	2209	Tb927.9.8820	Tb927.9.8820		hypothetical protein, conserved	119.55	4.7	0	28.975	1		1.64117	0.215153	0.0664282	1.17765		4.7	3	3	1.10155	0.042005	5.2314	3	1.7	1	1	1.9107	0.281193	NaN	1	1.7	1	1	2.1002	0.322261	NaN	1
	1497	Tb927.5.3400	Tb927.5.3400		calcium-translocating P-type ATPase,calcium pump	110.32	19	0	91.642	1		1.08786	0.036575	0.0666839	1.17598		14.9	15	15	1.1377	0.0560259	14.064	14	17.3	16	16	1.017	0.00732095	13.316	16	16.3	16	16	1.1127	0.0463781	11.723	19
	2127	Tb927.9.3350	Tb927.9.3350		pseudouridylate synthase, putative	46.294	3.9	0.00050787	3.0783	1	1	1.48043	0.170387	0.0671957	1.17266		3.9	1	1	2.04011	0.309653	NaN	1	3.9	1	1	1.2759	0.105817	NaN	1	3.9	1	1	1.2465	0.0956923	NaN	1
	1697	Tb927.7.2660	Tb927.7.2660	ZC3H20	zinc finger protein family member, putative (ZC3H20)	43.757	23.7	0	6.3739	1		0.788735	-0.103069	0.067383	1.17145		23.7	6	3	0.771545	-0.112639	69.93	3	23.7	6	3	0.67459	-0.17096	36.46	3	23.7	6	3	0.94274	-0.0256081	31.904	3
	1336	Tb927.4.1420	Tb927.4.1420		hypothetical protein, conserved	15.664	10.4	0	4.7986	1	1	1.16508	0.0663541	0.0674781	1.17084		10.4	1	1	1.31365	0.118478	0.72942	2	10.4	1	1	1.0635	0.0267375	19.709	2	10.4	1	1	1.132	0.0538464	NaN	1
	1181	Tb927.2.5180	Tb927.2.5180		aldo-keto reductase, putative	38.267	34.8	0	88.708	1		1.07663	0.0320654	0.0685014	1.1643		34.8	10	10	1.06921	0.029063	9.9306	12	34.8	10	10	1.025	0.0107239	23.056	12	34.8	10	10	1.1387	0.0564093	14.099	12
	557	Tb927.10.5550	Tb927.10.5550		hypothetical protein, conserved	15.912	9.4	0	15.311	1		1.96348	0.293026	0.0688563	1.16206		0	0	0				0	9.4	1	1	1.6929	0.228631	NaN	1	9.4	1	1	2.2773	0.35742	NaN	1
	893	Tb927.11.2330	Tb927.11.2330		molybdopterin synthase sulphurylase protein, putative	54.862	6.9	0	8.9485	1		1.13011	0.0531214	0.0689593	1.16141		6.5	3	3	1.04829	0.0204835	34.916	3	3.6	2	2	1.2451	0.0952042	37.521	3	6.9	4	4	1.1058	0.0436766	13.873	4
	1480	Tb927.5.2910	Tb927.5.2910		hypothetical protein, conserved	19.968	15.6	0	5.4903	1		1.14956	0.0605329	0.068993	1.1612		15.6	2	2	1.0333	0.0142278	15.213	2	15.6	2	2	1.1657	0.0665868	30.289	2	15.6	2	2	1.2612	0.100784	4.0653	2
	1637	Tb927.6.4930	Tb927.6.4930		hypothetical protein, conserved	30.051	17.4	0	31.575	1	1	1.29985	0.113893	0.0690913	1.16058		17.4	4	4	1.5658	0.194737	38.891	6	17.4	4	4	1.073	0.0305997	38.842	6	17.4	4	4	1.3072	0.116342	16.945	6
	2128	Tb927.9.3370	Tb927.9.3370	trx	thioredoxin (trx)	12.135	37.4	0	34.255	1	1	1.14478	0.058723	0.0691591	1.16015		37.4	4	4	1.03895	0.0165947	39.228	6	37.4	4	4	1.1436	0.0582741	10.436	5	29.9	3	3	1.2627	0.1013	5.4053	3
	1578	Tb927.6.2510	Tb927.6.2510		hypothetical protein, conserved	16.92	24	0	26.159	1	1	1.08922	0.0371157	0.0693686	1.15884		24	3	3	1.04286	0.0182267	35.938	4	24	3	3	1.06	0.0253059	8.3412	5	24	3	3	1.169	0.0678145	11.623	5
	2164	Tb927.9.5900	Tb927.9.5900	GDH	glutamate dehydrogenase (GDH)	112.11	65.1	0	323.31	1	1	1.11002	0.0453304	0.0693748	1.1588		65.1	61	61	1.01839	0.00791505	17.823	130	63.7	61	61	1.1718	0.0688535	15.246	136	65.1	60	60	1.1461	0.0592225	16.459	148
	691	Tb927.11.10370	Tb927.11.10370		glycosyl hydrolase-like protein	118.83	3.6	0	7.0892	1		1.11146	0.0458943	0.069448	1.15834		3.6	4	4	1.14	0.0569063	8.6285	4	3.6	4	4	1.02	0.00860017	1.6809	3	3.6	4	4	1.1808	0.0721763	21.099	4
	757	Tb927.11.1290	Tb927.11.1290		hypothetical protein, conserved	43.112	49	0	117.9	1	1	1.09498	0.0394053	0.0694898	1.15808		46.2	15	15	1.06321	0.0266181	16.109	27	46.2	17	17	1.046	0.0195317	12.327	27	43.7	16	16	1.1805	0.072066	13.348	34
	384	Tb927.10.13850	Tb927.10.13850		hypothetical protein, conserved	43.008	4.2	0.009633	1.9699	1	1	1.25517	0.0987036	0.0695226	1.15787		4.2	1	1	1.48006	0.170278	NaN	1	4.2	1	1	1.0652	0.0274312	NaN	1	4.2	1	1	1.2543	0.0984014	NaN	1
	1935	Tb927.8.5090;Tb11.v5.0723	Tb927.8.5090;Tb11.v5.0723	RPA190	DNA-directed RNA polymerase I largest subunit (RPA190) ;DNA-directed rna polymerase I largest subunit, putative	195.95	2	0	5.9278	2		1.24705	0.095883	0.0695792	1.15752		0.5	1	1	1.0372	0.0158644	NaN	1	2	3	3	1.3546	0.131811	9.7639	3	0.5	1	1	1.3803	0.139973	NaN	1
	1188	Tb927.2.5800	Tb927.2.5800	SBPase	sedoheptulose-1,7-bisphosphatase (SBPase)	35.502	43.4	0	145.19	1		1.07289	0.0305546	0.0696861	1.15685		38.3	11	11	1.03978	0.0169423	19.646	16	36.1	12	12	1.0438	0.0186173	29.085	23	31.6	11	11	1.1379	0.0561041	16.206	20
	1671	Tb927.7.1520	Tb927.7.1520		hypothetical protein, conserved	11.273	27.1	0	6.1527	1	1	1.09099	0.0378224	0.0697644	1.15637		27.1	2	2	1.05019	0.0212673	89.087	3	27.1	2	2	1.1735	0.0694831	11.47	2	27.1	2	2	1.0537	0.022717	8.726	2
	1916	Tb927.8.4290	Tb927.8.4290		hypothetical protein, conserved	22.468	11	0	5.3103	1		1.09265	0.0384823	0.0698977	1.15554		11	2	2	1.1688	0.0677394	9.2068	2	11	2	2	1.0282	0.0120776	5.7436	2	11	2	2	1.0855	0.0356298	5.2982	2
	623	Tb927.10.8050	Tb927.10.8050		TFIIF-stimulated CTD phosphatase, putative	30.425	6	0	32.945	1		1.22085	0.086663	0.070028	1.15473		6	1	1	1.15013	0.0607454	NaN	1	6	1	1	1.0984	0.0407605	NaN	1	6	1	1	1.4404	0.158483	NaN	1
	532	Tb927.10.4550	Tb927.10.4550		hypothetical protein, conserved	18.658	23.1	0	22.352	1	1	1.38198	0.140501	0.0700869	1.15436		23.1	3	3	1.34824	0.129766	9.6769	3	23.1	3	3	1.1069	0.0441084	22.894	3	9	1	1	1.7686	0.24763	NaN	1
	586	Tb927.10.6640	Tb927.10.6640		COP-coated vesicle membrane protein erv25 precursor, putative,ER--golgi transport protein erv25 precursor, putative	28.188	41.1	0	155.01	1		1.05146	0.0217945	0.0701021	1.15427		41.1	9	9	1.0399	0.016992	13.78	7	40.7	8	8	1.0207	0.00889811	15.418	7	37.9	8	8	1.0952	0.0394934	20.588	8
	2144	Tb927.9.4420	Tb927.9.4420		hypothetical protein, conserved	46.604	21.7	0	66.615	1		1.04675	0.019842	0.0702029	1.15365		21.4	5	5	1.08611	0.0358724	12.025	5	13.7	4	4	1.0371	0.0158206	13.554	4	21.7	6	6	1.0182	0.00783309	17.334	6
	2100	Tb927.9.15270	Tb927.9.15270		hypothetical protein, conserved	65.909	5.1	0	3.9414	1		1.45558	0.163037	0.0702065	1.15362		1.4	1	1	1.92667	0.284808	NaN	1	5.1	3	3	1.116	0.0476642	54.01	3	3.2	2	2	1.4343	0.15664	2.7975	2
	979	Tb927.11.4810	Tb927.11.4810		hypothetical protein, conserved	19.431	35.6	0	16.833	1	1	1.10822	0.0446247	0.0702571	1.15331		35.6	5	5	1.07424	0.0311016	14.122	9	23.6	4	4	1.0497	0.0210652	16.876	7	23.6	4	4	1.207	0.0817073	10.616	6
	541	Tb927.10.4890	Tb927.10.4890		hypothetical protein, conserved	32.142	7.6	0	4.4002	1		1.3136	0.118464	0.0708302	1.14978		7.6	2	2	1.29376	0.111854	5.4516	2	7.6	2	2	1.0845	0.0352296	18.298	2	7.6	2	2	1.6155	0.208307	42.236	2
	505	Tb927.10.3250;Tb11.v5.0824	Tb927.10.3250		hypothetical protein, conserved	35.309	9.1	0	4.0631	2	1	1.98746	0.298299	0.0709569	1.14901		0	0	0				0	6.8	2	2	1.7009	0.230679	23.3	2	9.1	3	3	2.3223	0.365918	17.822	3
	1665	Tb927.7.1130;Tb927.7.1120	Tb927.7.1130;Tb927.7.1120	TDPX2	trypanothione/tryparedoxin dependent peroxidase 2,glutathione peroxidase-like 2 (TDPX2) ;trypanothione/tryparedoxin dependent peroxidase 1, cytosolic,glutathione peroxidase-like protein 1 (TDPX1)	18.873	27.2	0	53.852	2	1	1.08415	0.0350875	0.0721224	1.14193		27.2	4	2	1.02112	0.00907538	17.892	2	27.2	4	2	1.1509	0.0610376	2.1542	2	27.2	4	2	1.0843	0.0351495	2.6548	2
	803	Tb927.11.14560	Tb927.11.14560		cleavage and polyadenylation specificity factor-like protein, putative	159.06	5	0	18.958	1		1.64682	0.216646	0.0729272	1.13711		1.2	2	2	1.50211	0.176702	40.091	2	5	7	7	1.199	0.0788192	25.027	4	1.7	3	3	2.4798	0.394417	40.224	4
	1424	Tb927.4.860	Tb927.4.860		hypothetical protein, conserved	33.145	10.3	0	16.215	1		1.51726	0.181061	0.0733562	1.13456		5.7	1	1	2.07293	0.316584	NaN	1	10.3	2	2	1.5172	0.181043	23.792	2	4.7	1	1	1.1106	0.0455577	NaN	1
	371	Tb927.10.13300	Tb927.10.13300		30S ribosomal protein S8, putative	32.681	6.7	0	4.2827	1	1	1.38997	0.143006	0.0734289	1.13413		6.7	2	2	1.17682	0.0707088	31.248	2	6.7	2	2	1.2367	0.0922644	23.385	2	3.9	1	1	1.8452	0.266043	NaN	1
	495	Tb927.10.2970	Tb927.10.2970		hypothetical protein, conserved	13.79	30.4	0	24.229	1	1	1.0996	0.0412362	0.0738059	1.13191		22.6	3	3	1.01404	0.00605702	92.536	5	30.4	4	4	1.16	0.064458	29.36	4	30.4	4	4	1.1303	0.0531937	14.802	4
	1668	Tb927.7.1300	Tb927.7.1300		protein disulfide isomerase, putative	41.939	22.8	0	38.562	1		1.05863	0.0247428	0.0740367	1.13055		22.8	9	9	1.10743	0.0443171	9.7833	8	22.8	9	9	1.0168	0.00723554	4.0232	7	20.2	8	8	1.0536	0.0226758	8.2955	7
	481	Tb927.10.240	Tb927.10.240	PEX14	peroxin 14, putative (PEX14)	39.937	14.5	0	41.932	1		1.2116	0.0833611	0.0744249	1.12828		11.2	3	3	1.23528	0.0917671	10.946	3	14.5	4	4	1.039	0.0166155	5.6112	4	11.5	3	3	1.3858	0.141701	13.293	3
	164	Tb927.10.16170;Tb11.v5.0396	Tb927.10.16170;Tb11.v5.0396		potassium voltage-gated channel, putative ;potassium voltage-gated channel, putative	34.606	16.9	0	25.292	2	1	2.19666	0.341763	0.0744517	1.12813		14.3	3	3	1.10709	0.0441824	55.389	3	12.1	3	3	2.9831	0.474668	25.54	4	16.9	4	4	3.2095	0.506437	6.409	3
	335	Tb927.10.12090	Tb927.10.12090	RBP7A	RNA-binding protein, putative (RBP7A)	13.272	14.7	0	3.9354	1		1.04479	0.0190302	0.0745709	1.12743		14.7	2	2	1.01223	0.00527822	7.7569	3	14.7	2	2	1.0814	0.0339864	9.8966	2	14.7	2	2	1.0419	0.017826	4.6142	2
	1223	Tb927.3.2110	Tb927.3.2110		TFIIF-stimulated CTD phosphatase, putative	47.205	2.8	0.0074315	2.1289	1		1.18996	0.075534	0.0748272	1.12594		2.8	1	1	1.10203	0.0421917	NaN	1	2.8	1	1	1.1035	0.0427723	8.6729	2	2.8	1	1	1.3856	0.141638	NaN	1
	1717	Tb927.7.3270	Tb927.7.3270		hypothetical protein, conserved	90.386	6.7	0	30.717	1	1	1.34541	0.128855	0.0749014	1.12551		3.8	3	3	1.04036	0.0171817	14.085	4	3.7	3	3	1.4814	0.170672	10.304	5	3	2	2	1.5802	0.198712	1.4608	4
	652	Tb927.10.9190	Tb927.10.9190	IleRS	isoleucyl-tRNA synthetase, putative (IleRS)	130.6	5.6	0	3.9886	1	1	0.421904	-0.374787	0.0750178	1.12484		4.3	2	2	0.830703	-0.0805543	NaN	1	2.3	2	2	0.40241	-0.395331	126.82	2	1.3	1	1	0.22466	-0.648474	NaN	1
	1419	Tb927.4.720	Tb927.4.720		hypothetical protein, conserved	12.297	21	0	24.196	1	1	1.29569	0.112501	0.0754085	1.12258		21	2	2	1.09123	0.0379149	6.6774	2	12.4	1	1	1.2402	0.0934917	7.2187	2	12.4	1	1	1.6073	0.206097	NaN	1
	1811	Tb927.7.7330	Tb927.7.7330		hypothetical protein, conserved	47.401	10.4	0	28.374	1	1	1.40462	0.147559	0.0756369	1.12127		10.4	3	3	1.1152	0.0473528	21.015	3	10.4	3	3	1.3363	0.125904	15.348	3	10.4	3	3	1.8596	0.26942	9.5561	3
	1634	Tb927.6.4700	Tb927.6.4700		hypothetical protein, conserved	37.792	22	0	14.158	1	1	1.19733	0.0782134	0.0759823	1.11929		22	6	6	1.06787	0.02852	20.189	6	17	5	5	1.152	0.0614525	9.2265	6	22	6	6	1.3953	0.144668	9.2797	7
	1390	Tb927.4.4160	Tb927.4.4160	MRB4160	mitochondrial RNA binding protein (MRB4160)	102.78	19	0	64.39	1		1.0691	0.0290172	0.0759983	1.1192		14.9	11	7	1.03051	0.0130537	17.496	12	19	15	10	1.0462	0.0196147	22.067	14	19	15	10	1.1334	0.0543832	19.719	15
	1534	Tb927.5.920	Tb927.5.920		hypothetical protein, conserved	50.734	8.9	0	6.3943	1	1	1.2283	0.0893056	0.0763177	1.11737		8.9	3	3	1.05206	0.0220387	45.381	3	5.6	2	2	1.2213	0.0868224	5.8504	3	2.9	1	1	1.4423	0.159056	NaN	1
	1611	Tb927.6.4000	Tb927.6.4000	SGT	small glutamine-rich tetratricopeptide repeat protein, putative (SGT)	45.966	4.3	0.004298	2.4223	1		1.77257	0.248603	0.0764179	1.11681		0	0	0				0	4.3	1	1	1.5408	0.187746	NaN	1	4.3	1	1	2.0392	0.30946	NaN	1
	1100	Tb927.11.9390	Tb927.11.9390		lipoate-protein ligase, putative,lipoyltransferase, putative	29.64	18.5	0	14.703	1	1	1.0983	0.0407195	0.0765388	1.11612		12.8	2	2	1.02492	0.0106881	8.1294	2	18.5	3	3	1.0922	0.0383022	9.6306	3	18.5	3	3	1.1835	0.0731683	14.841	5
	606	Tb927.10.7520	Tb927.10.7520	FPGS	folylpolyglutamate synthase, putative (FPGS)	54.676	6.2	0	10.308	1		1.03839	0.0163608	0.0765973	1.11579		6.2	2	2	1.07355	0.0308218	20.891	2	6.2	2	2	1.0242	0.0103848	22.501	2	3.4	1	1	1.0183	0.00787574	NaN	1
	538	Tb927.10.4830	Tb927.10.4830		hypothetical protein, conserved	22.137	15.4	0	11.805	1		0.873108	-0.0589321	0.0766392	1.11555		15.4	2	2	0.939496	-0.0271049	9.7158	2	7	1	1	0.77471	-0.110861	NaN	1	7	1	1	0.91447	-0.0388305	NaN	1
	1660	Tb927.7.1010	Tb927.7.1010		hypothetical protein, conserved	19.659	20.5	0	22.461	1	1	1.2901	0.110623	0.0766471	1.1155		19.3	4	4	1.53153	0.185127	18.058	5	20.5	5	5	1.0419	0.017826	9.5034	6	20.5	5	5	1.3456	0.128916	7.1756	6
	1508	Tb927.5.3840	Tb927.5.3840		hypothetical protein, conserved	63.647	3	0	8.9981	1	1	1.17514	0.0700886	0.0767769	1.11477		3	1	1	1.0191	0.0082159	NaN	1	3	1	1	1.2815	0.107719	NaN	1	3	1	1	1.2426	0.0943313	NaN	1
	2214	Tb927.9.9080	Tb927.9.9080		hypothetical protein, conserved	28.704	5.1	0	44.146	1	1	1.2223	0.0871761	0.0769971	1.11353		5.1	1	1	1.03252	0.0139004	NaN	1	5.1	1	1	1.4002	0.14619	NaN	1	5.1	1	1	1.2631	0.101438	NaN	1
	443	Tb927.10.15710	Tb927.10.15710	MCP7	mitochondrial carrier protein (MCP7)	35.875	12.7	0	10.069	1	1	1.31081	0.11754	0.0772893	1.11188		8	3	3	1.38495	0.141433	3.0895	3	12.7	4	4	1.5637	0.194153	21.334	4	9.9	3	3	1.04	0.0170333	40.549	2
	1730	Tb927.7.3630	Tb927.7.3630		TPR-repeat-containing chaperone protein DNAJ, putative	60.135	22.5	0	37.954	1		1.08443	0.0352032	0.0774062	1.11122		18.6	7	7	1.01918	0.00825131	17.654	6	17.4	8	8	1.0829	0.0345884	10.566	6	14.2	6	6	1.1555	0.0627699	21.459	5
	243	Tb927.1.1960	Tb927.1.1960		chaperone protein DNAj, putative	75.71	1.7	0.00698	2.1585	1		1.2424	0.094262	0.0775496	1.11042		1.7	1	1	1.50085	0.176337	NaN	1	1.7	1	1	1.0869	0.0361896	0.29033	2	1.7	1	1	1.1756	0.0702596	15.574	2
	398	Tb927.10.14330	Tb927.10.14330		hypothetical protein, conserved	115.95	3.4	0	11.134	1		1.08441	0.0351947	0.0777026	1.10956		3.4	3	3	1.01843	0.00793274	26.95	6	3.4	3	3	1.0841	0.0350693	19.492	8	3.4	3	3	1.155	0.062582	21.089	6
	544	Tb927.10.5020	Tb927.10.5020		hypothetical protein, conserved	21.98	22.1	0	33.064	1		1.0831	0.034668	0.0780612	1.10756		22.1	4	4	1.01607	0.00692546	14.827	4	16.4	3	3	1.1504	0.0608489	9.2176	3	16.4	3	3	1.087	0.0362295	22.153	3
	1228	Tb927.3.2230	Tb927.3.2230		succinyl-CoA synthetase alpha subunit, putative	31.464	36.2	0	125.99	1	1	1.07849	0.0328166	0.0781058	1.10732		36.2	10	10	1.00867	0.00375109	9.8794	18	36.2	10	10	1.1038	0.0428904	6.7687	15	36.2	10	10	1.1267	0.0518083	20.103	23
	1496	Tb927.5.3390	Tb927.5.3390		ADG1, pseudogene	13.175	18.6	0	10.356	1	1	1.11535	0.0474099	0.0781803	1.1069		18.6	2	2	1.10715	0.0442065	17.593	3	18.6	2	2	1.0284	0.0121621	11.487	2	18.6	2	2	1.2186	0.0858612	1.4825	2
	1570	Tb927.6.2220	Tb927.6.2220		hypothetical protein, conserved	14.871	41.1	0	18.697	1		1.26776	0.103037	0.0784145	1.1056		41.1	4	4	1.05312	0.0224776	8.8322	7	41.1	4	4	1.2683	0.103222	10.757	4	35.7	3	3	1.5255	0.183412	17.059	3
	1593	Tb927.6.3230	Tb927.6.3230		RNA pseudouridylate synthase, putative	51.608	3	0.0052306	2.3832	1		2.05784	0.313411	0.0785204	1.10502		3	1	1	2.46792	0.392331	NaN	1	3	1	1	1.7159	0.234492	NaN	1	0	0	0				0
	1026	Tb927.11.6280	Tb927.11.6280	PPDK	pyruvate phosphate dikinase (PPDK)	100.45	74	0	323.31	1		1.0626	0.026369	0.0791791	1.10139		69.4	64	64	1.03764	0.0160446	14.733	164	66.7	64	64	1.03	0.0128372	13.504	153	69.8	66	66	1.1226	0.050225	16.929	189
	2174	Tb927.9.6460	Tb927.9.6460		hypothetical protein, conserved	170.34	16.5	0	207.96	1		1.06826	0.0286761	0.0794094	1.10013		8.6	9	9	1.02308	0.00990989	25.499	11	15.8	19	19	1.0529	0.0223871	20.572	16	13.9	16	16	1.1317	0.0537313	26.585	17
	1914	Tb927.8.4230	Tb927.8.4230		hypothetical protein, conserved	119.02	13.4	0	66.538	1	1	1.10417	0.0430346	0.0798401	1.09778		13.4	11	11	1.15157	0.0612902	35.631	11	13.4	11	11	1.0088	0.00380507	17.003	11	13.4	11	11	1.1588	0.0640085	11.254	13
	1275	Tb927.3.4030	Tb927.3.4030		hypothetical protein, conserved	135.25	8.3	0	85.779	1	1	1.25611	0.0990274	0.07993	1.09729		7	5	5	1.0858	0.0357498	10.955	4	4.2	3	3	1.1878	0.0747433	14.725	3	4	3	3	1.5367	0.186589	18.872	3
	333	Tb927.10.12000	Tb927.10.12000		iron-sulfur cluster assembly protein, putative	11.772	33.3	0	11.724	1	1	1.18695	0.074431	0.0800708	1.09653		33.3	3	3	1.17086	0.0685065	66.441	6	33.3	3	3	1.044	0.0187005	12.005	2	21.2	2	2	1.368	0.136086	4.84	2
	848	Tb927.11.16430	Tb927.11.16430	ERAP18	18 kDa ER-associated protein (ERAP18)	17.898	20.9	0	6.7477	1		2.16672	0.335802	0.0803202	1.09518		20.9	2	2	2.64473	0.422382	41.744	2	11.1	1	1	1.7751	0.249223	NaN	1	0	0	0				0
	2188	Tb927.9.7470	Tb927.9.7470	NT10	purine nucleoside transporter (NT10)	50.675	6.1	0	11.944	1		1.18387	0.0733042	0.0806888	1.09319		6.1	2	2	1.27444	0.105318	10.636	2	6.1	2	2	1.0139	0.00599512	12.919	4	6.1	2	2	1.2841	0.108599	28.467	3
	497	Tb927.10.3010	Tb927.10.3010		hypothetical protein, conserved	133.39	5.5	0	13.124	1		1.06722	0.028256	0.0808687	1.09222		2.9	3	3	1.02867	0.0122757	9.5218	3	4.6	5	5	1.0435	0.0184925	17.509	5	4.7	5	5	1.1324	0.0539999	29.951	4
	1803	Tb927.7.690	Tb927.7.690		zinc finger protein, putative	53.865	2.9	0	6.3821	1		1.23245	0.0907683	0.0811652	1.09063		2.9	1	1	1.43959	0.15824	NaN	1	2.9	1	1	1.0331	0.0141424	NaN	1	2.9	1	1	1.2587	0.0999222	53.843	2
	169	Tb927.1.1030;Tb11.v5.0436	Tb927.1.1030;Tb11.v5.0436		leucine-rich repeat protein (LRRP), putative ;hypothetical protein, conserved	49.852	3.9	0	115.76	2		1.13149	0.0536525	0.0812918	1.08995		3.9	1	1	1.01561	0.00672694	NaN	1	3.9	1	1	1.1572	0.0634084	NaN	1	3.9	1	1	1.2326	0.0908222	NaN	1
	1934	Tb927.8.5070	Tb927.8.5070		hypothetical protein, conserved	14.117	28.8	0	5.4052	1		0.945546	-0.0243172	0.0814292	1.08922		16.8	2	2	0.898553	-0.0464561	11.71	3	28.8	3	3	0.96255	-0.0165767	9.1557	3	16.8	2	2	0.97742	-0.00991878	1.4351	2
	849	Tb927.11.16450	Tb927.11.16450		hypothetical protein, conserved	15.017	12	0	4.4012	1		1.17269	0.0691826	0.0816118	1.08825		12	1	1	1.1737	0.0695553	NaN	1	12	1	1	1.0317	0.0135534	NaN	1	12	1	1	1.3318	0.124439	NaN	1
	2126	Tb927.9.3340	Tb927.9.3340		hypothetical protein, conserved	20.051	25	0	15.443	1	1	1.11279	0.0464132	0.0816273	1.08816		15.5	2	2	1.0953	0.039534	3.5002	4	25	5	5	1.0307	0.0131323	14.146	6	25	5	5	1.2206	0.0865734	10.916	6
	306	Tb927.10.10830	Tb927.10.10830	RGG2	RGG2 (RGG2)	32.404	28.8	0	323.31	1	1	1.07978	0.0333346	0.0817946	1.08728		28.8	14	14	1.09371	0.0389018	14.981	52	28.8	14	14	1.0098	0.00423537	21.155	60	28.8	14	14	1.1399	0.0568668	14.575	58
	1899	Tb927.8.3270	Tb927.8.3270		hypothetical protein	21.687	10.4	0	17.187	1		1.15992	0.0644298	0.0819573	1.08641		3.5	1	1	1.29061	0.110794	NaN	1	10.4	2	2	1.1856	0.0739382	24.859	4	3.5	1	1	1.0199	0.00855759	NaN	1
	2074	Tb927.9.13540	Tb927.9.13540		hypothetical protein, conserved	41.261	4.2	0.0052281	2.3815	1	1	1.5595	0.192986	0.0819769	1.08631		4.2	1	1	1.0441	0.0187433	NaN	1	4.2	1	1	1.7547	0.244203	NaN	1	4.2	1	1	2.0702	0.316012	NaN	1
	1411	Tb927.4.520	Tb927.4.520		hypothetical protein, conserved	23.602	18.2	0	76.147	1	1	1.08165	0.0340858	0.0822824	1.08469		18.2	3	3	1.05921	0.024982	8.5835	4	14.3	2	2	1.0288	0.012331	2.895	3	18.2	3	3	1.1613	0.0649444	6.2088	4
	1619	Tb927.6.4180	Tb927.6.4180		hypothetical protein, conserved	16.327	36.2	0	73.334	1	1	1.08732	0.0363558	0.0824377	1.08387		36.2	5	5	1.00595	0.00257429	9.9369	10	36.2	5	5	1.1358	0.0553019	7.4751	10	36.2	5	5	1.1251	0.0511911	19.059	10
	1834	Tb927.8.1290	Tb927.8.1290		hypothetical protein, conserved	120.05	2	0	4.8811	1		1.11249	0.0462977	0.0825302	1.08339		0.8	1	1	1.09469	0.0392914	NaN	1	2	2	2	1.0302	0.0129215	11.201	2	2	2	2	1.2209	0.0866801	3.4345	2
	1215	Tb927.3.1820	Tb927.3.1820	MRB1820	mitochondrial RNA binding complex 1 subunit (MRB1820)	25.432	44.1	0	323.31	1	1	1.06564	0.0276111	0.0827179	1.0824		44.1	12	12	1.03507	0.0149689	11.62	29	44.1	12	12	1.0339	0.0144785	14.215	29	41.6	11	11	1.1308	0.0533858	13.958	27
	149	Tb927.10.6290;Tb11.v5.0277	Tb927.10.6290;Tb11.v5.0277		ATP-dependent DEAD/H RNA helicase, putative ;ATP-dependent DEAD/H RNA helicase, putative	57.578	2.9	0	3.4049	2		0.938134	-0.0277349	0.0829629	1.08112		2.9	1	1	0.884251	-0.0534242	NaN	1	2.9	1	1	0.95936	-0.0180184	NaN	1	2.9	1	1	0.97328	-0.0117622	20.191	2
	1701	Tb927.7.2700	Tb927.7.2700	B5R	NADH-cytochrome b5 reductase, putative (B5R)	31.856	82.2	0	287.28	1	1	1.07163	0.0300466	0.0829793	1.08103		79.8	24	24	1.01879	0.00808315	24.316	99	77	24	24	1.0613	0.0258382	20.635	104	79.8	25	25	1.1382	0.0562186	15.638	102
	1845	Tb927.8.1600	Tb927.8.1600		lysyl-tRNA synthetase, putative	66.786	5.1	0	11.609	1		1.15611	0.062999	0.0830617	1.0806		3.8	1	1	1.06337	0.0266828	NaN	1	5.1	2	2	1.0988	0.0409187	14.986	2	5.1	2	2	1.3225	0.121396	1.5659	2
	629	Tb927.10.8170	Tb927.10.8170		nuclear pore complex protein (NUP155), putative,nucleoporin, putative	144.37	1.8	0	8.9246	1		1.05879	0.02481	0.0833781	1.07895		1.8	2	2	1.00373	0.00161859	16.912	2	1.8	2	2	1.083	0.0346285	9.3473	2	1.8	2	2	1.0919	0.0381829	22.036	2
	1298	Tb927.3.5350	Tb927.3.5350		hypothetical protein, conserved	11.599	18.1	0	8.4093	1		1.11402	0.0468945	0.0835997	1.0778		18.1	3	3	1.09276	0.0385267	22.851	5	18.1	3	3	1.0318	0.0135955	2.7859	4	18.1	3	3	1.2262	0.0885613	5.6462	3
	260	Tb927.1.3260	Tb927.1.3260		hypothetical protein, conserved	203.06	1.5	0	5.8118	1		1.23441	0.0914597	0.0836762	1.0774		1.5	2	2	1.30639	0.116072	NaN	1	1.5	2	2	1.1664	0.0668475	NaN	1	0	0	0				0
	2227	Tb927.9.9840	Tb927.9.9840	GCVH	lipoic acid containing carrier protein, putative (GCVH)	15.216	23.9	0	10.139	1	1	1.13765	0.0560087	0.0837341	1.0771		23.9	3	3	1.13097	0.0534495	14.25	4	23.9	3	3	1.0273	0.0116973	4.9726	4	23.9	3	3	1.2673	0.102879	13.637	3
	1221	Tb927.3.2050	Tb927.3.2050		hypothetical protein, conserved	172.41	20.2	0	145.06	1	1	1.08002	0.0334315	0.0839615	1.07592		18.9	27	27	1.08731	0.0363538	10.551	48	18.8	28	28	1.0111	0.00479411	15.789	47	20.2	29	29	1.1459	0.0591467	15.257	49
	1622	Tb927.6.4300;Tb927.6.4280;Tb927.10.6880;Tb11.v5.0516	Tb927.6.4300;Tb927.6.4280	GAPDH	glyceraldehyde 3-phosphate dehydrogenase, glycosomal (GAPDH) ;glyceraldehyde 3-phosphate dehydrogenase, glycosomal (GAPDH)	39.047	74.1	0	318.93	4		1.07442	0.0311742	0.0843407	1.07396		74.1	26	26	1.01076	0.00465004	17.755	57	74.1	25	25	1.0797	0.0333031	53.071	64	74.1	25	25	1.1365	0.0555694	33.864	61
	1447	Tb927.5.1730	Tb927.5.1730		inhibitor of serine peptidase (ISP), putative,ecotin family (I11), putative	19.342	16.4	0	7.1929	1		1.0925	0.0384232	0.0847007	1.07211		6.7	1	1	1.04826	0.0204698	NaN	1	16.4	2	2	1.1881	0.074853	1.2072	2	16.4	2	2	1.047	0.0199467	7.2926	2
	2096	Tb927.9.15090	Tb927.9.15090		cytosolic coat protein, putative	24.595	36.5	0	81.483	1		1.07979	0.0333388	0.084736	1.07193		36.5	7	7	1.03291	0.0140618	11.1	15	36.5	7	7	1.0502	0.021272	13.211	18	36.5	7	7	1.1606	0.0646826	15.875	13
	1725	Tb927.7.3460	Tb927.7.3460		hypothetical protein, conserved	50.252	4.7	0	3.2628	1	1	1.18861	0.0750395	0.0849917	1.07062		4.7	2	2	1.1482	0.0600167	2.1875	2	2	1	1	1.0524	0.0221808	NaN	1	2	1	1	1.3897	0.142921	NaN	1
	1296	Tb927.3.5250	Tb927.3.5250	ZC3H8	ZFP family member, putative (ZC3H8)	61.206	3.5	0	6.0657	1		1.09173	0.0381145	0.0853405	1.06884		3.5	2	2	1.01652	0.00711525	13.935	3	3.5	2	2	1.0895	0.0372272	3.5888	2	3.5	2	2	1.1749	0.0700009	5.7537	3
	1368	Tb927.4.2850	Tb927.4.2850		hypothetical protein, conserved	72.637	27.9	0	220.1	1		1.07252	0.0304041	0.0854053	1.06852		27.9	13	13	1.05007	0.0212171	26.557	17	25.8	12	12	1.0261	0.0111897	20.702	16	20.9	10	10	1.145	0.0588055	15.477	20
	563	Tb927.10.5760	Tb927.10.5760		adenylate kinase, putative	24.31	79.5	0	136.73	1		1.06839	0.0287315	0.0855776	1.06764		78.1	19	19	1.01088	0.00469833	18.902	46	78.1	19	19	1.0698	0.0293026	17.76	47	78.6	19	19	1.1277	0.0521936	21.423	57
	1584	Tb927.6.2710	Tb927.6.2710		hypothetical protein, conserved	85.616	4.6	0	14.97	1		1.08534	0.0355652	0.0856143	1.06745		4.6	3	3	1.04246	0.0180591	35.887	5	4.6	3	3	1.045	0.0191163	19.034	3	4.6	3	3	1.1736	0.0695201	6.265	3
	759	Tb927.11.12920	Tb927.11.12920		hypothetical protein, conserved	47.225	21.2	0	57.518	1		1.08109	0.0338626	0.0857274	1.06688		14.9	9	9	1.08836	0.0367743	11.931	9	20.9	10	10	1.0104	0.00449334	11.492	9	16.5	9	9	1.149	0.06032	13.31	9
	1415	Tb927.4.590	Tb927.4.590		hypothetical protein, conserved	88.024	19.9	0	177.87	1		1.07586	0.0317563	0.0857963	1.06653		19.9	12	12	1.00479	0.00207654	21.121	13	19.9	12	12	1.1276	0.0521551	19.503	13	18.3	11	11	1.0991	0.0410372	14.229	13
	1941	Tb927.8.5220	Tb927.8.5220		hypothetical protein, conserved	114.05	10.9	0	24.462	1	1	1.15323	0.0619163	0.0858748	1.06613		10.9	8	8	1.10341	0.0427376	50.238	12	10.1	7	7	1.0543	0.0229642	5.6403	11	8.1	6	6	1.3184	0.120047	13.984	9
	1309	Tb927.3.5620	Tb927.3.5620		hypothetical protein, conserved	112.6	2.7	0	5.9739	1		1.1971	0.0781295	0.0864555	1.06321		0	0	0				0	1.3	1	1	1.2586	0.0998877	NaN	1	2.7	2	2	1.1386	0.0563712	21.487	2
	1968	Tb927.8.6080	Tb927.8.6080		hypothetical protein, conserved	38.08	33.6	0	54.647	1	1	1.10749	0.044341	0.0867692	1.06163		33.6	10	10	1.04755	0.020174	47.731	10	33.6	10	10	1.0615	0.02592	12.435	11	30.6	9	9	1.2216	0.086929	10.236	9
	280	Tb927.1.5000	Tb927.1.5000		hypothetical protein, conserved	30.458	8.1	0	4.8714	1		1.08452	0.0352377	0.0868447	1.06126		8.1	2	2	1.12267	0.0502539	8.5878	3	8.1	2	2	1.1327	0.0541149	2.3753	2	8.1	2	2	1.0031	0.00134423	15.399	4
	723	Tb927.11.11520	Tb927.11.11520	PEX11	glycosomal membrane protein (PEX11)	24.027	61.5	0	170.41	1		1.09814	0.0406583	0.0869867	1.06055		56	11	11	1.00406	0.0017581	9.633	17	55.5	10	10	1.1368	0.0556841	15.47	21	61.5	12	12	1.1602	0.0645329	24.44	21
	777	Tb927.11.13520	Tb927.11.13520		hypothetical protein, conserved	105.38	11.7	0	95.625	1		1.07734	0.0323529	0.0879203	1.05591		8.9	7	7	1.11711	0.0480945	4.7652	5	10.7	8	8	1.0021	0.000911062	15.724	8	9.5	7	7	1.117	0.0480532	15.135	7
	1532	Tb927.5.840	Tb927.5.840		hypothetical protein, conserved	111.5	4.1	0	11.56	1		1.15161	0.0613048	0.0879861	1.05559		4.1	3	3	1.00742	0.0032126	36.768	4	4.1	3	3	1.2645	0.101919	7.9833	4	4.1	3	3	1.1989	0.078783	16.977	5
	990	Tb927.11.5110	Tb927.11.5110		hypothetical protein, conserved	51.097	2.2	0.0038685	2.5278	1		1.23247	0.0907759	0.0882429	1.05432		2.2	1	1	1.00956	0.00413237	NaN	1	2.2	1	1	1.4107	0.149435	NaN	1	2.2	1	1	1.3145	0.118761	NaN	1
	1691	Tb927.7.2390	Tb927.7.2390		hypothetical protein, conserved	102.86	25.7	0	120.5	1		1.07971	0.0333076	0.0882503	1.05428		24.6	19	19	1.10551	0.0435626	18.666	40	25.6	21	21	1.0035	0.00151738	19.181	47	25.7	22	22	1.1346	0.0548428	19.024	45
	788	Tb927.11.13890	Tb927.11.13890		hypothetical protein, conserved	30.693	23.5	0	27.6	1	1	1.09422	0.0391061	0.0882582	1.05425		19.8	5	5	1.153	0.0618307	7.8481	6	23.5	6	6	1.0029	0.00125763	57.453	8	23.5	6	6	1.133	0.0542299	11.667	8
	2122	Tb927.9.2900	Tb927.9.2900		hypothetical protein, conserved	287.19	19.9	0	323.31	1		1.04259	0.0181149	0.0883844	1.05362		17.6	38	38	1.03228	0.0137973	35.982	51	19.2	44	44	1.0126	0.00543792	27.257	62	19.1	42	42	1.0842	0.0351094	26.958	56
	1666	Tb927.7.1160	Tb927.7.1160		hypothetical protein, conserved	14.631	40	0	120.61	1	1	1.17579	0.0703283	0.0884706	1.0532		40	5	5	1.00394	0.00170578	8.3286	10	33.1	4	4	1.2695	0.103633	12.089	5	40	5	5	1.2754	0.105646	7.6257	5
	1894	Tb927.8.3160	Tb927.8.3160		hypothetical protein, conserved	18.646	20	0	44.882	1		1.10544	0.0435343	0.0885801	1.05266		20	5	5	1.07097	0.0297787	6.9249	6	20	5	5	1.0365	0.0155693	18.882	6	20	5	5	1.2169	0.0852549	5.3413	7
	1367	Tb927.4.2790	Tb927.4.2790		hypothetical protein, conserved	62.809	4.6	0	5.8984	1	1	1.6198	0.209462	0.0887482	1.05184		2.5	1	1	1.52751	0.183984	NaN	1	4.6	2	2	1.1122	0.0461829	10.244	2	4.6	2	2	2.5016	0.398218	26.989	2
	1690	Tb927.7.2360	Tb927.7.2360		N-acetyltransferase, putative	34.599	9.4	0	30.961	1		1.12842	0.052472	0.0889301	1.05095		9.4	2	2	1.01721	0.00741114	11.432	2	9.4	2	2	1.2485	0.0963885	4.0627	2	9.4	2	2	1.1314	0.0536162	16.498	2
	782	Tb927.11.13650	Tb927.11.13650	CYB5	cytochrome b5, putative (CYB5)	12.906	37	0	22.684	1		1.13611	0.0554215	0.0889416	1.0509		11.8	1	1	1.28297	0.108217	NaN	1	37	3	3	1.0963	0.0399294	4.5771	3	37	3	3	1.0426	0.0181177	16.199	3
	1155	Tb927.2.4000	Tb927.2.4000		hypothetical protein, conserved	97.393	6.7	0	9.2691	1	1	1.16173	0.065106	0.0889524	1.05084		6.7	4	4	1.16042	0.0646137	18.249	4	6.7	4	4	1.0236	0.0101303	16.13	4	6.7	4	4	1.32	0.120574	20.681	5
	1685	Tb927.7.2240	Tb927.7.2240		hypothetical protein, conserved	59.665	34.7	0	104.04	1		1.08779	0.0365437	0.0891589	1.04984		28.9	16	16	1.00638	0.00276219	10.334	21	28.9	16	16	1.1042	0.0430477	16.026	21	34.7	18	18	1.1583	0.0638211	24.153	32
	767	Tb927.11.13230	Tb927.11.13230		hypothetical protein, conserved	23.909	27.3	0	60.714	1		1.09948	0.0411855	0.0894299	1.04852		21.8	4	4	1.0392	0.0166985	14.555	5	17.6	3	3	1.0605	0.0255107	7.0857	3	27.3	5	5	1.206	0.0813473	27.582	7
	131	Tb11.v5.0195;Tb927.10.6010	Tb11.v5.0195;Tb927.10.6010		hypothetical protein, conserved ;hypothetical protein, conserved	115.4	2.4	0	9.0235	2		1.27829	0.10663	0.0896824	1.04729		2.4	2	2	1.62705	0.2114	16.194	2	2.4	2	2	1.1491	0.0603578	24.898	2	2.4	2	2	1.1172	0.0481309	28.962	3
	228	Tb927.10.14740;Tb927.10.14620;Tb11.v5.1063	Tb927.10.14740;Tb927.10.14620;Tb11.v5.1063		hypothetical protein, conserved ;hypothetical protein, conserved ;hypothetical protein, conserved	44.177	19.5	0	33.402	3		1.09852	0.0408078	0.0899866	1.04582		16.4	4	4	1.20364	0.0804983	36.037	6	17.1	4	4	1.0639	0.0269008	10.536	4	19.5	5	5	1.0352	0.0150243	16.765	6
	779	Tb927.11.13600	Tb927.11.13600		hypothetical protein, conserved	40.402	11.6	0	26.909	1	1	1.26289	0.101364	0.0900661	1.04544		11.6	3	3	1.11206	0.0461292	46.225	3	11.6	3	3	1.1394	0.0566762	21.087	3	11.6	3	3	1.5896	0.201288	34.236	3
	388	Tb927.10.13990	Tb927.10.13990		hypothetical protein, conserved	39.633	26.3	0	67.44	1	1	1.0565	0.0238695	0.0901904	1.04484		26.3	6	6	1.10073	0.0416798	9.6586	8	21.1	5	5	1.0036	0.00156065	8.2771	7	26.3	6	6	1.0675	0.0283679	22.359	9
	1576	Tb927.6.2440	Tb927.6.2440		hypothetical protein, conserved	42.805	3.6	0.0024802	2.8345	1		1.39733	0.145299	0.0902937	1.04434		3.6	1	1	1.01308	0.00564325	NaN	1	3.6	1	1	1.5334	0.185655	NaN	1	3.6	1	1	1.7563	0.244599	NaN	1
	1851	Tb927.8.1860	Tb927.8.1860		pitrilysin-like metalloprotease,metallo-peptidase, Clan ME, Family M16C	114.53	7.8	0	118.33	1	1	1.47659	0.169261	0.0903428	1.04411		5.4	3	3	1.34865	0.129901	49.419	4	6.6	4	4	1.1167	0.0479365	13.562	3	7.8	5	5	2.1377	0.329947	22.765	3
	1500	Tb927.5.3510	Tb927.5.3510	SMC3	structural maintenance of chromosome 3 , putative (SMC3)	136.37	4	0	8.0499	1		1.29563	0.112481	0.0903486	1.04408		1.9	1	1	1.15062	0.0609303	NaN	1	2.1	2	2	1.1293	0.0528093	14.267	2	1.1	1	1	1.6738	0.223704	NaN	1
	1583	Tb927.6.2700	Tb927.6.2700	Sm-E	small nuclear ribonucleoprotein Sm-E (Sm-E)	9.6554	24.4	0	7.4951	1		1.1746	0.0698914	0.0904058	1.0438		14	1	1				0	24.4	2	2	1.2311	0.0902933	NaN	1	10.5	1	1	1.1207	0.0494894	NaN	1
	733	Tb927.11.11850	Tb927.11.11850		splicing factor 3B subunit 1, putative	122.03	4.6	0	11.823	1		1.22568	0.0883765	0.0906493	1.04264		4.6	4	4	1.11833	0.0485702	38.308	5	4.6	4	4	1.0981	0.0406419	5.6949	4	4.6	4	4	1.4994	0.175918	24.054	4
	989	Tb927.11.510;Tb927.11.500	Tb927.11.510;Tb927.11.500	UBP2	RNA-binding protein, UBP2 (UBP2) ;RNA-binding protein, UBP1 (UBP1)	19.559	34.3	0	136.36	2		1.06601	0.0277597	0.0913563	1.03926		34.3	6	6	1.0264	0.0113162	17.019	21	34.3	6	6	1.0392	0.0166991	14.383	14	34.3	6	6	1.1357	0.0552636	16.971	19
	793	Tb927.11.14090	Tb927.11.14090		hypothetical protein, conserved	51.674	29.2	0	73.994	1		1.08515	0.0354886	0.0913982	1.03906		29.2	13	13	1.00078	0.000338882	16.742	24	29.2	13	13	1.1206	0.0494506	18.488	22	29.2	13	13	1.1394	0.0566762	27.319	29
	996	Tb927.11.5300	Tb927.11.5300	Kif13-3	kinesin, putative,mitotic centromere-associated kinesin, putative (Kif13-3)	62.524	5.8	0	26.516	1		1.12867	0.0525675	0.0919368	1.03651		5.8	3	3	1.10051	0.0415938	33.846	5	5.8	3	3	1.2666	0.102639	21.05	4	5.8	3	3	1.0315	0.0134692	12.002	3
	1359	Tb927.4.2440	Tb927.4.2440		hypothetical protein, conserved	44.263	4.2	0	3.1897	1	1	1.49549	0.174783	0.0921812	1.03536		4.2	2	2	1.89236	0.277004	13.658	2	4.2	2	2	1.7662	0.24704	3.7041	2	4.2	2	2	1.0007	0.0003039	63.551	2
	397	Tb927.10.14320	Tb927.10.14320		hypothetical protein, conserved	121.8	3	0	7.9642	1		1.05933	0.0250298	0.0921885	1.03532		2.1	2	2	1.00894	0.003865	5.7078	4	3	3	3	1.1151	0.0473138	32.256	3	3	3	3	1.0566	0.0239106	6.225	4
	1820	Tb927.7.840	Tb927.7.840		hypothetical protein, conserved	14.51	35.5	0	16.965	1	1	1.14893	0.0602951	0.0923963	1.03435		35.5	4	4	1.10836	0.0446827	11.033	8	35.5	4	4	1.0409	0.017409	15.308	5	26.6	3	3	1.3146	0.118794	4.4565	3
	2082	Tb927.9.13990	Tb927.9.13990	DRBD2	RNA-binding protein, putative (DRBD2)	34.618	32.1	0	54.507	1		1.05822	0.0245776	0.0923995	1.03433		32.1	9	9	1.00463	0.00200673	20.121	17	32.1	9	9	1.0646	0.0271865	21.707	16	24.9	7	7	1.108	0.0445398	31.118	13
	1620	Tb927.6.4200	Tb927.6.4200		hypothetical protein, conserved	50.398	11.5	0	27.486	1	1	1.21465	0.0844513	0.0927639	1.03262		9	3	3	1.20957	0.082631	5.29	3	11.5	4	4	1.0273	0.0116973	12.073	4	11.5	4	4	1.4422	0.159025	24.918	3
	556	Tb927.10.5540	Tb927.10.5540		hypothetical protein, conserved	30.445	24.7	0	14.161	1	1	1.11272	0.0463865	0.0928638	1.03215		24.7	5	5	1.06711	0.0282094	23.554	6	17.7	4	4	1.0427	0.0181594	16.363	6	17.7	4	4	1.2382	0.0927908	8.802	6
	1035	Tb927.11.6430	Tb927.11.6430		hypothetical protein, conserved	134.73	2.3	0	4.3201	1		0.037236	-1.42904	0.0928972	1.032		2.3	2	2	1.02245	0.00964338	NaN	1	1	1	1	0.0083831	-2.0766	NaN	1	1	1	1	0.0060234	-2.22016	NaN	1
	666	Tb927.10.9810	Tb927.10.9810		hypothetical protein, conserved	33.886	16.9	0	16.533	1	1	1.19984	0.0791222	0.0930858	1.03112		13.6	3	3	1.00008	3.47449e-05	30.645	5	16.9	4	4	1.2848	0.108836	14.674	4	16.9	4	4	1.3443	0.128496	16.075	4
	281	Tb927.1.5030	Tb927.1.5030		leucine-rich repeat protein (LRRP), putative	80.773	2.3	0	13.198	1		1.80396	0.256226	0.0931095	1.03101		2.3	1	1	2.15471	0.333388	NaN	1	2.3	1	1	1.5103	0.179063	NaN	1	2.3	1	1				0
	155	Tb11.v5.0337;Tb927.10.5380	Tb11.v5.0337;Tb927.10.5380		hypothetical protein, conserved ;intraflagellar transport protein IFT122, putative	134.73	1.3	0	12.651	2		0.75429	-0.122462	0.0931141	1.03098		1.3	1	1	0.716435	-0.144823	NaN	1	1.3	1	1	0.60725	-0.216632	NaN	1	1.3	1	1	0.98644	-0.00592933	NaN	1
	1356	Tb927.4.2260	Tb927.4.2260	centrin1	centrin, putative (centrin1)	21.119	6.6	0	5.675	1		1.06668	0.0280359	0.0931882	1.03064		6.6	1	1	1.00143	0.000621486	NaN	1	6.6	1	1	1.0853	0.0355498	NaN	1	6.6	1	1	1.1167	0.0479365	NaN	1
	1530	Tb927.5.760	Tb927.5.760		cell cycle sequence binding phosphoprotein (RBP33), putative	79.048	2	0	3.9938	1		1.21678	0.0852105	0.0932472	1.03036		2	1	1	1.02855	0.0122265	NaN	1	2	1	1	1.208	0.0820669	12.674	2	2	1	1	1.4499	0.161338	1.9173	2
	1376	Tb927.4.330	Tb927.4.330		hypothetical protein, conserved	43.016	15	0	21.766	1	1	1.05156	0.021832	0.0933324	1.02997		15	4	4	1.06309	0.0265719	17.66	4	15	4	4	1.0018	0.000781027	8.7958	4	15	4	4	1.0918	0.0381431	21.717	4
	1663	Tb927.7.1070	Tb927.7.1070	KREX1	KREX1 (KREX1)	98.694	1.5	0.0024752	2.8113	1		1.12326	0.050482	0.0934007	1.02965		1.5	1	1	1.02517	0.010795	NaN	1	1.5	1	1	1.1027	0.0424574	NaN	1	1.5	1	1	1.2537	0.0981936	NaN	1
	346	Tb927.10.12420	Tb927.10.12420		predicted S. cerevisiae Got1 homologue	15.605	7	0	8.2774	1		1.06704	0.0281823	0.094325	1.02537		7	1	1	1.11391	0.0468494	9.1981	2	7	1	1	0.99989	-4.7775e-05	4.1515	2	7	1	1	1.0908	0.0377451	5.1155	2
	483	Tb927.10.2530	Tb927.10.2530		adenylate kinase, putative	24.941	89.2	0	323.31	1	1	1.04348	0.018483	0.0945942	1.02414		86.5	33	33	1.03761	0.0160356	68.326	144	86.5	37	37	1.0081	0.00350361	14.687	172	89.2	38	38	1.0862	0.0359098	36.372	204
	614	Tb927.10.7810	Tb927.10.7810		hypothetical protein, conserved	80.305	10.8	0	21.557	1		1.1537	0.0620944	0.0947175	1.02357		6.6	4	4	1.3088	0.116873	58.881	6	6.3	4	4	1.0162	0.00697919	18.896	4	10.8	6	6	1.1546	0.0624316	21.873	6
	1089	Tb927.11.8950	Tb927.11.8950	TbLRRP1	leucine rich repeat (TbLRRP1)	78.96	38.8	0	213.8	1		1.05811	0.0245326	0.0955559	1.01974		33.4	20	20	1.04354	0.0185076	17.475	34	35.5	22	22	1.0147	0.00633766	19.695	50	36.6	21	21	1.1188	0.0487525	18.828	44
	1433	Tb927.5.1210	Tb927.5.1210		short-chain dehydrogenase, putative	33.876	59.5	0	323.31	1		1.05127	0.0217138	0.0961022	1.01727		59.5	17	17	1.02292	0.00984325	14.001	40	59.5	17	17	1.0261	0.0111897	17.953	45	59.5	17	17	1.1069	0.0441084	16.258	56
	231	Tb927.1.120	Tb927.1.120		retrotransposon hot spot protein 4 (RHS4), putative	98.024	46.7	0	323.31	1		1.07773	0.0325102	0.09643	1.01579		44.3	38	11	1.0008	0.000347575	19.323	39	45.9	41	11	1.0967	0.0400878	18.425	29	43.8	39	11	1.1405	0.0570953	26.367	35
	1957	Tb927.8.5760	Tb927.8.5760		hypothetical protein, conserved	53.809	12.6	0	33.714	1		1.13045	0.0532512	0.0964726	1.0156		8.2	3	3	1.0577	0.0243614	1.2027	3	10.3	4	4	1.0643	0.0270641	5.1813	4	12.6	5	5	1.2833	0.108328	27.879	3
	313	Tb927.10.11270	Tb927.10.11270	RBP23	RNA-binding protein, putative (RBP23)	26.664	14	0	18.372	1		1.07267	0.0304673	0.096677	1.01468		14	3	3	1.07167	0.0300625	12.588	3	14	3	3	1.0077	0.00333126	1.9104	3	14	3	3	1.1429	0.0580082	19.688	3
	789	Tb927.11.13910	Tb927.11.13910		hypothetical protein, conserved	28.921	5.3	0	7.5272	1	1	2.02068	0.305499	0.0970842	1.01285		5.3	1	1	1.61928	0.209321	NaN	1	5.3	1	1	2.5216	0.401676	NaN	1	0	0	0				0
	1098	Tb927.11.9280	Tb927.11.9280		hypothetical protein, conserved	74.128	13	0	32.168	1	1	0.966458	-0.014817	0.0975369	1.01083		13	6	6	0.943485	-0.0252649	15.931	8	9.9	5	5	0.95621	-0.0194467	20.988	6	7.9	4	4	1.0006	0.000260499	19.075	7
	1442	Tb927.5.1590	Tb927.5.1590		hypothetical protein, conserved	28.263	16.9	0	48.218	1		1.25534	0.0987616	0.097831	1.00952		8.7	1	1	0.991572	-0.0036759	NaN	1	16.9	2	2	1.4476	0.160649	NaN	1	16.9	2	2	1.3782	0.139312	11.357	2
	201	Tb927.9.15380;Tb11.v5.0686	Tb927.9.15380;Tb11.v5.0686		NADH-ubiquinone oxidoreductase complex I subunit, putative ;hypothetical protein, conserved	42.585	37.3	0	93.999	2	1	1.14403	0.0584379	0.0984819	1.00664		34.3	10	10	1.16934	0.0679425	14.078	9	33	10	10	1.0028	0.00121433	12.169	10	26.5	9	9	1.2769	0.106157	14.009	8
	87	Tb927.5.4500;Tb05.5K5.150	Tb927.5.4500;Tb05.5K5.150	TbSAR1	ras-like small GTPase, putative (TbSAR1) ;small GTP-binding protein, putative,BAC from homologous region on chr5	21.771	12.9	0	6.5775	2		1.13297	0.05422	0.0985964	1.00614		12.9	2	2	0.994036	-0.00259798	9.7362	2	12.9	2	2	1.2003	0.0792898	66.576	3	12.9	2	2	1.2189	0.0859681	20.032	3
	2208	Tb927.9.8740	Tb927.9.8740	DRBD3	RNA-binding protein (DRBD3)	36.984	29.1	0	183.44	1		1.06903	0.0289908	0.0986037	1.00611		29.1	10	10	0.998303	-0.000737674	8.1107	22	26.9	9	9	1.0918	0.0381431	14.694	23	29.1	10	10	1.1209	0.0495669	16.193	21
	1687	Tb927.7.2300	Tb927.7.2300	TbNup132	Nucleoporin (TbNup132)	132.36	4.8	0	11.986	1		1.14553	0.059005	0.0986871	1.00574		4.2	4	4	1.26153	0.100897	12.987	3	3.3	4	4	0.99646	-0.00154013	26.748	4	2.4	3	3	1.1958	0.0776585	11.467	3
	1507	Tb927.5.3810	Tb927.5.3810		orotidine-5-phosphate decarboxylase/orotate phosphoribosyltransferase, putative,OMPDCase-OPRTase, putative	49.955	43.2	0	188.64	1		1.10094	0.0417624	0.0987228	1.00558		43.2	19	19	1.1149	0.0472366	16.359	30	40.4	17	17	1.003	0.00130093	16.034	29	43.2	19	19	1.1933	0.0767496	15.03	41
	1416	Tb927.4.600	Tb927.4.600		hypothetical protein, conserved	34.458	14.8	0	14.305	1	1	1.28553	0.109082	0.0990506	1.00414		9.8	3	3	1.15109	0.0611102	1.2998	3	12	3	3	1.1031	0.0426149	14.528	3	14.8	4	4	1.6731	0.223522	18.524	3
	1621	Tb927.6.4270	Tb927.6.4270		hypothetical protein, conserved	27.15	12.7	0	3.9819	1		1.09856	0.040823	0.0991287	1.0038		12.7	2	2	1.19868	0.0787038	34.522	2	12.7	2	2	1.0097	0.00419236	10.505	2	12.7	2	2	1.0954	0.0395727	22.373	4
	1885	Tb927.8.2990	Tb927.8.2990		hypothetical protein, conserved	35.687	13.4	0	31.618	1		1.09001	0.0374314	0.099286	1.00311		9.1	2	2	1.03651	0.0155717	34.378	3	13.4	3	3	1.1936	0.0768588	12.407	3	13.4	3	3	1.0468	0.0198637	20.021	5
	731	Tb927.11.11780	Tb927.11.11780		acyl-CoA dehydrogenase, putative	66.634	12.5	0	44.29	1	1	1.11432	0.0470117	0.100762	0.996702		10.7	4	4	0.99453	-0.00238207	25.822	8	12.5	5	5	1.1998	0.0791089	19.473	8	10.7	4	4	1.1596	0.0643082	21.648	5
	253	Tb927.1.2750	Tb927.1.2750		hypothetical protein, conserved	18.698	64.3	0	181.43	1		1.08682	0.0361578	0.100872	0.99623		64.3	10	10	0.995917	-0.00177697	17.608	18	64.3	10	10	1.1195	0.0490241	11.495	14	64.3	10	10	1.1514	0.0612262	7.619	15
	1032	Tb927.11.6360	Tb927.11.6360		60S ribosomal protein L24, putative	22.732	8.4	0	4.4696	1		1.20184	0.0798471	0.100994	0.995703		8.4	1	1	1.01396	0.00602179	NaN	1	8.4	1	1	1.4247	0.153723	NaN	1	8.4	1	1	1.2017	0.0797961	NaN	1
	212	Tb927.8.5465;Tb927.8.5440;Tb11.v5.0798;Tb11.v5.0797;Tb927.8.5460;Tb927.8.5470	Tb927.8.5465;Tb927.8.5440;Tb11.v5.0798;Tb11.v5.0797;Tb927.8.5460;Tb927.8.5470	Tb-24	flagellar calcium-binding protein,24 kDa calflagin,24 kDa calcimedin (Tb-24) ;flagellar calcium-binding protein,24 kDa calflagin,24 kDa calcimedin (Tb-24) ;flagellar calcium-binding protein ;flagellar calcium-binding protein ;flagellar calcium-binding prot	24.247	11.9	0	26.117	6		1.15308	0.0618596	0.10109	0.995291		11.9	2	2	1.00775	0.00335263	11.31	2	11.9	2	2	1.16	0.064458	27.729	4	11.9	2	2	1.3115	0.117768	5.4554	2
	1750	Tb927.7.4180	Tb927.7.4180		fatty acid elongase, putative	33.87	25.6	0	38.645	1		1.06338	0.0266872	0.101901	0.991823		22.3	5	5	1.06331	0.0266597	14.11	9	25.6	6	6	1.0043	0.00186346	11.105	8	19	5	5	1.126	0.0515384	11.608	6
	1326	Tb927.3.950	Tb927.3.950		hypothetical protein, conserved	47.573	4.3	0	6.2842	1	1	1.10129	0.0419024	0.102573	0.988969		4.3	1	1	1.17554	0.0702389	NaN	1	4.3	1	1	1.1436	0.0582741	NaN	1	4.3	1	1	0.99356	-0.0028059	NaN	1
	1873	Tb927.8.2490	Tb927.8.2490		hypothetical protein, conserved	35.229	21	0	29.248	1	1	1.08912	0.0370739	0.102651	0.988635		21	6	6	1.15713	0.0633807	10.272	6	21	6	6	0.99488	-0.0022293	10.594	6	21	6	6	1.1222	0.0500703	20.585	6
	1788	Tb927.7.6260	Tb927.7.6260		hypothetical protein, conserved	36.454	23.3	0	72.637	1		1.16362	0.065811	0.103464	0.985211		20.8	5	5	1.25469	0.0985362	14.675	5	23.3	6	6	0.98721	-0.00559045	9.4476	5	23.3	6	6	1.272	0.104487	6.1979	5
	991	Tb927.11.5220	Tb927.11.5220		chaperone protein DNAj, putative	84.81	4.4	0	9.9458	1		1.15469	0.0624642	0.103626	0.984532		1.3	1	1	1.04305	0.0183037	23.96	2	4.4	2	2	1.0961	0.0398502	9.6629	3	1.3	1	1	1.3466	0.129239	16.399	3
	1148	Tb927.2.3610	Tb927.2.3610		hypothetical protein, conserved	16.06	50	0	77.919	1	1	1.12345	0.0505543	0.104446	0.981107		41	6	6	1.10274	0.0424741	26.068	9	50	7	7	1.0168	0.00723554	18.485	8	41	6	6	1.2646	0.101953	5.988	5
	2110	Tb927.9.1720	Tb927.9.1720		peroxisomal membrane protein 4, putative	25.459	8.5	0	10.215	1		1.08008	0.0334556	0.104747	0.979858		8.5	2	2	1.13227	0.0539508	10.231	4	8.5	2	2	0.99286	-0.00311199	30.198	5	8.5	2	2	1.1208	0.0495281	24.644	3
	1001	Tb927.11.5440	Tb927.11.5440		malic enzyme	61.506	3.2	0	9.5915	1		1.09394	0.0389934	0.105138	0.978241		3.2	1	1	1.10058	0.0416225	NaN	1	3.2	1	1	1.1877	0.0747068	NaN	1	3.2	1	1	1.0015	0.000650954	NaN	1
	2176	Tb927.9.6620	Tb927.9.6620		unspecified product	25.522	28.7	0	41.19	1	1	1.24036	0.0935468	0.105685	0.975987		28.7	6	6	0.978474	-0.0094509	6.5003	6	28.7	6	6	1.412	0.149835	12.174	6	28.7	6	6	1.3812	0.140257	12.729	6
	237	Tb927.1.1730	Tb927.1.1730		hypothetical protein, conserved	75.065	7.1	0	4.8915	1	1	1.26687	0.102731	0.105709	0.975886		4.5	2	2	1.00527	0.00228169	40.371	2	3.8	2	2	1.5788	0.198327	21.64	2	3.8	2	2	1.2811	0.107583	15.631	2
	1276	Tb927.3.4210	Tb927.3.4210		hypothetical protein, conserved	192.82	4.3	0	44.016	1	1	1.20025	0.0792701	0.105906	0.97508		2.9	5	5	1.12601	0.051543	23.224	3	4.3	7	7	1.0501	0.0212307	44.235	5	3.6	6	6	1.4623	0.165036	26.68	5
	440	Tb927.10.15680	Tb927.10.15680		hypothetical protein, conserved	260.9	6.6	0	40.471	1		1.12108	0.0496375	0.106105	0.974265		6.3	14	14	1.19251	0.0764607	73.491	17	5.6	13	13	0.988	-0.00524306	71.519	13	6.3	14	14	1.1959	0.0776949	19.816	14
	1796	Tb927.7.650	Tb927.7.650		hypothetical protein, conserved	105.93	5.7	0	15.316	1		1.09814	0.0406592	0.106437	0.972908		3.7	2	2	1.21502	0.0845843	7.5242	3	5.7	3	3	1.0233	0.010003	17.66	5	5.7	3	3	1.0651	0.0273904	8.5449	5
	1160	Tb927.2.4230;Tb11.v5.0827	Tb927.2.4230;Tb11.v5.0827		NUP-1 protein, putative ;NUP-1 protein, putative	406.9	44.3	0	301.74	2		1.08697	0.0362156	0.106644	0.972062		39.7	16	16	1.02738	0.011731	19.617	18	43.6	20	20	1.0492	0.0208583	19.919	19	43.9	20	20	1.1914	0.0760576	22.391	21
	603	Tb927.10.7430	Tb927.10.7430		GTP-binding protein, putative	51.559	13.6	0	19.212	1	1	1.19436	0.0771336	0.106731	0.97171		13.6	4	4	1.01989	0.0085524	51.452	8	10.4	3	3	1.1668	0.0669964	7.1038	3	13.6	4	4	1.4317	0.155852	36.457	7
	1987	Tb927.8.680	Tb927.8.680	KREPA5	KREPA5 (KREPA5)	19.083	29	0	10.034	1	1	1.22832	0.0893132	0.106973	0.970724		15.4	2	2	0.978474	-0.0094509	23.19	3	29	5	5	1.3475	0.129529	19.505	6	21.9	3	3	1.4056	0.147862	17.181	3
	813	Tb927.11.14960	Tb927.11.14960	PUF7	pumilio/PUF RNA binding protein 7, putative (PUF7)	78.663	14.5	0	32	1		1.0736	0.0308434	0.107157	0.969981		10.4	6	6	1.01148	0.00495743	21.718	6	12.5	7	7	1.0574	0.0242393	20.443	10	12.1	7	7	1.157	0.0633334	15.784	6
	151	Tb927.10.15940;Tb11.v5.0304	Tb927.10.15940;Tb11.v5.0304		cation transporter, putative ;cation transporter, putative	40.114	3	0	16.229	2		1.26853	0.103302	0.107282	0.969474		3	1	1	1.64978	0.217427	NaN	1	3	1	1	1.0793	0.0331422	NaN	1	3	1	1	1.1464	0.0593362	NaN	1
	430	Tb927.10.15290;Tb11.v5.0628	Tb927.10.15290;Tb11.v5.0628		hypothetical protein, conserved ;hypothetical protein, conserved	178.49	5.7	0	36.932	2		1.07611	0.0318583	0.107315	0.969341		5.7	8	8	0.991768	-0.00358977	14.545	5	3.6	5	5	1.1257	0.0514227	14.834	4	2.9	4	4	1.1162	0.047742	19.223	4
	451	Tb927.10.1610	Tb927.10.1610		hypothetical protein, conserved	16.358	36.7	0	74.409	1		1.09953	0.0412056	0.107357	0.969171		31.3	3	3	1.08039	0.0335813	5.4964	4	31.3	3	3	1.0134	0.0057809	7.3764	4	36.7	4	4	1.2141	0.0842545	11.182	6
	330	Tb927.10.11930	Tb927.10.11930		beta-D-hydroxybutyrate dehydrogenase	27.645	63.1	0	276.94	1	1	1.07186	0.0301395	0.107478	0.96868		54.2	11	11	1.02507	0.0107549	38.809	23	56.2	12	12	1.0376	0.01603	17.923	24	63.1	15	15	1.1578	0.0636335	29.737	29
	230	Tb927.1.1150	Tb927.1.1150		zeta tubulin	52.704	2.5	0	9.0664	1		0.868656	-0.0611519	0.107549	0.968392		2.5	1	1	0.765931	-0.11581	NaN	1	2.5	1	1	0.85261	-0.0692496	NaN	1	2.5	1	1	1.0037	0.00160392	NaN	1
	786	Tb927.11.13810	Tb927.11.13810		ATP-dependent DEAD/H RNA helicase, putative,ATP- dependent RNA helicase, putative	62.912	8.8	0	13.159	1		1.16399	0.0659491	0.107593	0.968216		8.8	3	3	0.982511	-0.00766245	28.549	5	8.8	3	3	1.2611	0.10075	25.594	3	6.5	2	2	1.2728	0.10476	33.924	3
	1950	Tb927.8.5580	Tb927.8.5580		hypothetical protein, conserved	526.41	5.5	0	121	1		1.13222	0.0539318	0.107634	0.968051		4.3	17	17	1.00138	0.00059974	30.284	15	4.3	17	17	1.1385	0.056333	44.727	16	4	15	15	1.2731	0.104863	14.227	11
	1741	Tb927.7.3960	Tb927.7.3960		50S ribosomal protein L16, putative	19.13	10.8	0	5.2268	1	1	1.28634	0.109357	0.107788	0.967428		6	1	1	0.971817	-0.0124154	46.055	2	10.8	2	2	1.5132	0.179896	10.234	3	6	1	1	1.4474	0.160589	NaN	1
	680	Tb927.11.10050	Tb927.11.10050		hypothetical protein, conserved	12.051	14.7	0	23.319	1		1.11042	0.0454866	0.108308	0.96534		14.7	1	1	1.11305	0.0465158	9.057	2	14.7	1	1	1.0018	0.000781027	NaN	1	14.7	1	1	1.2279	0.089163	NaN	1
	1631	Tb927.6.4540	Tb927.6.4540		3-hydroxy-3-methylglutaryl-CoA reductase, putative	45.944	37.8	0	322.7	1	1	1.07247	0.0303871	0.108525	0.964471		37.8	17	17	1.00883	0.0038168	19.643	42	37.8	17	17	1.0595	0.025101	16.313	46	37.8	17	17	1.1541	0.0622434	11.272	54
	1092	Tb927.11.9080	Tb927.11.9080		hypothetical protein, conserved	136.27	11.3	0	38.114	1		1.10135	0.0419251	0.108543	0.964399		10.7	10	10	1.01668	0.0071859	24.105	11	9.1	9	9	1.0758	0.0317315	15.468	9	11.3	11	11	1.2214	0.0868579	27.161	10
	163	Tb11.v5.0394;Tb927.10.15750	Tb11.v5.0394;Tb927.10.15750		hypothetical protein, conserved ;hypothetical protein, conserved	183.78	25.1	0	100.01	2		1.09853	0.0408107	0.109064	0.96232		24.6	11	11	1.0102	0.00440868	28.216	13	25.1	15	15	1.083	0.0346285	14.517	17	21.3	10	10	1.2117	0.0833951	41.067	13
	435	Tb927.10.15410	Tb927.10.15410	gMDH	glycosomal malate dehydrogenase (gMDH)	33.71	36.2	0	89.122	1		1.06294	0.0265075	0.109087	0.962228		36.2	14	14	0.99295	-0.0030726	13.846	34	35	13	13	1.1093	0.045049	17.485	42	36.2	14	14	1.0903	0.037546	22.919	48
	1306	Tb927.3.5550	Tb927.3.5550	TbRX1	small GTP-binding protein, putative (TbRX1)	20.638	7.1	0.0038666	2.5183	1		1.09707	0.0402361	0.109176	0.961872		7.1	1	1	0.990295	-0.00423537	NaN	1	7.1	1	1	1.176	0.0704073	NaN	1	7.1	1	1	1.1338	0.0545365	NaN	1
	2129	Tb927.9.3410	Tb927.9.3410		unspecified product	13.824	29.4	0	6.4407	1	1	1.27546	0.105665	0.109396	0.960999		16.7	2	2	1.4871	0.17234	21.524	2	29.4	3	3	0.96947	-0.0134656	22.527	3	29.4	3	3	1.4392	0.158121	14.965	3
	945	Tb927.11.3790	Tb927.11.3790		hypothetical protein, conserved	32.372	19.2	0	13.867	1		1.0814	0.0339868	0.110023	0.958518		16.1	5	5	0.993443	-0.00285693	14.604	5	13	4	4	1.1029	0.0425361	10.723	4	19.2	6	6	1.1542	0.0622811	21.375	5
	1551	Tb927.6.1680	Tb927.6.1680	MRB1680	mitochondrial RNA binding protein 1 (MRB1680)	58.05	1.5	0.0096242	1.9602	1	1	0.922357	-0.0351012	0.110727	0.955747		1.5	1	1	0.908678	-0.04159	NaN	1	1.5	1	1	1.0054	0.00233888	NaN	1	1.5	1	1	0.85891	-0.0660523	NaN	1
	1630	Tb927.6.4530	Tb927.6.4530	RBP17	RNA-binding protein, putative (RBP17)	16.821	63.4	0	100.46	1		1.05604	0.02368	0.110803	0.955449		52.3	6	6	0.992851	-0.00311572	6.6779	8	63.4	7	7	1.0965	0.0400086	15.142	9	56.9	6	6	1.0818	0.034147	7.2874	7
	2212	Tb927.9.9000	Tb927.9.9000		isopentenyl-diphosphate delta-isomerase (type II), putative	38.986	11.8	0	3.6129	1		1.4037	0.147274	0.110851	0.95526		4.5	1	1				0	2.8	1	1	1.5876	0.200741	NaN	1	7.3	2	2	1.2411	0.0938068	10.407	2
	428	Tb927.10.1520	Tb927.10.1520	RAB21	small GTPase, putative,Ras-related protein, putative (RAB21)	28.639	33.1	0	71.731	1		1.07155	0.0300124	0.110931	0.954947		33.1	7	7	0.990589	-0.00410632	28.861	6	23.8	5	5	1.1076	0.0443829	5.6838	5	26	6	6	1.1214	0.0497606	13.353	7
	1713	Tb927.7.310	Tb927.7.310		hypothetical protein, conserved	33.129	5.4	0	11.73	1	1	1.30811	0.116644	0.111225	0.953797		5.4	1	1	1.18616	0.0741415	NaN	1	0	0	0				0	5.4	1	1	1.4426	0.159146	NaN	1
	1061	Tb927.11.7510;Tb927.11.7460	Tb927.11.7510;Tb927.11.7460		glucose-regulated protein 78, putative,luminal binding protein 1 (BiP), putative ;glucose-regulated protein 78, putative,luminal binding protein 1 (BiP), putative	71.434	57.6	0	323.31	2		1.05496	0.0232377	0.111713	0.951898		56.4	31	31	1.08043	0.0335954	20.074	40	57.6	31	31	0.99262	-0.00321698	11.906	40	57.4	29	29	1.0948	0.0393348	21.698	36
	106	Tb11.v5.0537;Tb927.11.9920;Tb11.01.1680.v5	Tb11.v5.0537;Tb927.11.9920;Tb11.01.1680.v5		polyubiquitin, putative ;polyubiquitin, putative ;polyubiquitin, putative	70.128	51.7	0	260.31	3		1.06015	0.0253666	0.112182	0.950078		51.7	6	6	1.00094	0.000408429	64.254	34	51.7	7	7	1.1245	0.0509595	63.131	41	51.7	7	7	1.0586	0.0247319	64.562	42
	1030	Tb927.11.6340	Tb927.11.6340		hypothetical protein, conserved	45.429	10	0	15.302	1		1.23088	0.090215	0.113037	0.946779		6.2	2	2	1.01959	0.00842397	13.228	4	7	2	2	1.1883	0.0749261	12.462	4	3.2	1	1	1.5392	0.187295	23.849	2
	2078	Tb927.9.13780	Tb927.9.13780		hypothetical protein, conserved	33.466	4.1	0	3.4371	1	1	1.85584	0.26854	0.113085	0.946596		4.1	1	1	2.33438	0.368171	NaN	1	4.1	1	1	1.4754	0.16891	NaN	1	0	0	0				0
	2204	Tb927.9.8520	Tb927.9.8520		hypothetical protein, conserved	32.198	3.9	0	3.471	1		1.45455	0.162728	0.113362	0.945534		0	0	0				0	3.9	1	1	1.6721	0.223262	NaN	1	3.9	1	1	1.2653	0.102194	NaN	1
	1458	Tb927.5.2090	Tb927.5.2090		kinesin, putative	122.72	43.4	0	323.31	1		1.08293	0.0345997	0.113797	0.943869		35.4	29	28	1.10317	0.0426418	26.208	40	41.3	34	33	0.99183	-0.00356276	22.269	42	40.3	33	32	1.1607	0.06472	16.936	37
	374	Tb927.10.13430	Tb927.10.13430		citrate synthase, putative	53.584	8.7	0	8.3025	1	1	0.941274	-0.026284	0.113861	0.943626		8.7	4	4	0.946163	-0.0240339	6.6308	4	8.7	4	4	0.9977	-0.00100003	17.941	4	8.7	4	4	0.88345	-0.053818	27.528	4
	1682	Tb927.7.2190	Tb927.7.2190		hypothetical protein, conserved	29.242	20.7	0	16.668	1		1.08584	0.0357651	0.113988	0.94314		20.7	5	5	1.07046	0.0295694	10.072	5	20.7	5	5	1.0074	0.00320195	4.3376	5	20.7	5	5	1.1872	0.0745239	12.476	5
	298	Tb927.10.10420	Tb927.10.10420		monothiol glutaredoxin, putative	14.888	9.9	0.006539	2.1888	1	1	1.0614	0.0258772	0.115813	0.936242		9.9	1	1	1.02225	0.00955902	NaN	1	9.9	1	1	1.1385	0.056333	NaN	1	9.9	1	1	1.0274	0.0117396	NaN	1
	1704	Tb927.7.2780	Tb927.7.2780		hypothetical protein, conserved	12.723	20.5	0	41.148	1		1.09514	0.0394707	0.116525	0.933581		20.5	3	3	0.985999	-0.00612361	4.0023	8	20.5	3	3	1.1311	0.053501	10.195	8	20.5	3	3	1.1777	0.0710347	9.3139	7
	1071	Tb927.11.8040	Tb927.11.8040		hypothetical protein, conserved	22.255	5.4	0.0029426	2.6965	1	1	1.19131	0.0760258	0.116626	0.933206		5.4	1	1	1.06444	0.0271217	NaN	1	5.4	1	1	1.084	0.0350293	NaN	1	5.4	1	1	1.4653	0.165927	NaN	1
	1159	Tb927.2.4210	Tb927.2.4210	PEPCK	glycosomal phosphoenolpyruvate carboxykinase (PEPCK)	58.564	76.4	0	323.31	1		1.04702	0.019954	0.116756	0.93272		76.4	46	46	0.992162	-0.00341745	21.763	134	73.7	42	42	1.0833	0.0347487	18.883	136	76	45	45	1.0679	0.0285306	16.265	150
	1799	Tb927.7.6670;Tb11.v5.0444	Tb927.7.6670		hypothetical protein, conserved	332.9	5.9	0	71.736	2		1.11625	0.0477618	0.116909	0.932152		4.4	10	10	1.17192	0.0688983	22.247	9	5.3	12	12	0.98101	-0.00832657	24.141	11	4.2	10	10	1.2098	0.0827136	50.957	9
	1468	Tb927.5.2530	Tb927.5.2530		hypothetical protein, conserved	114.91	15.2	0	71.531	1		1.06365	0.0267976	0.117007	0.93179		13.3	11	11	0.990884	-0.00397724	30.598	11	14.5	12	12	1.1198	0.0491405	23.157	14	14.3	12	12	1.0845	0.0352296	82.804	13
	516	Tb927.10.3610	Tb927.10.3610		hypothetical protein, conserved	53.984	7.6	0	14.61	1		1.0937	0.0388984	0.117212	0.931027		7.6	3	3	1.05714	0.0241318	20.749	3	2.6	1	1	1.0194	0.00834463	NaN	1	7.6	3	3	1.214	0.0842187	18.647	3
	1776	Tb927.7.5680	Tb927.7.5680		deoxyribose-phosphate aldolase, putative	30.037	40	0	60.911	1		1.07655	0.0320323	0.117518	0.929894		36.4	8	8	1.01825	0.00785313	11.853	12	40	10	10	1.0437	0.0185757	8.4018	11	36.4	9	9	1.174	0.0696681	15.119	9
	2105	Tb927.9.15460	Tb927.9.15460		calcium motive p-type ATPase, putative	113.97	5	0	111.91	1		1.10227	0.0422889	0.117927	0.928387		5	3	3	0.984737	-0.00667993	14.114	3	5	3	3	1.138	0.0561423	14.477	3	5	3	3	1.1951	0.0774042	5.4966	3
	476	Tb927.10.230	Tb927.10.230		proteasome alpha 5 subunit, putative,20S proteasome subunit alpha 5	27.176	4.9	0.0010035	2.9511	1		1.29831	0.113377	0.118109	0.927717		4.9	1	1	0.954198	-0.0203613	NaN	1	4.9	1	1	1.45	0.161368	NaN	1	4.9	1	1	1.5817	0.199124	NaN	1
	2147	Tb927.9.4660	Tb927.9.4660		hypothetical protein, conserved	55.558	6.9	0	20.112	1	1	1.29019	0.110655	0.118237	0.927245		6.9	2	2	1.01379	0.00594694	41.961	2	6.9	2	2	1.2385	0.092896	20.64	2	6.9	2	2	1.7105	0.233123	35.317	2
	908	Tb927.11.2670	Tb927.11.2670	TbNup59	Nucleoporin (TbNup59)	58.822	3.9	0.0043103	2.4347	1		1.16135	0.0649646	0.11826	0.927161		3.9	2	2	1.30596	0.11593	46.987	3	1.5	1	1	1.2311	0.0902933	15.594	2	3.9	2	2	0.97425	-0.0113296	28.535	2
	2179	Tb927.9.6910	Tb927.9.6910		hypothetical protein, conserved	17.806	8.6	0	15.272	1	1	1.23278	0.0908871	0.118499	0.926287		8.6	1	1	1.57833	0.198199	NaN	1	8.6	1	1	1.0501	0.0212307	NaN	1	8.6	1	1	1.1304	0.0532321	NaN	1
	2182	Tb927.9.7110	Tb927.9.7110		unspecified product	32.572	15.9	0	20.967	1		1.10229	0.0422955	0.119012	0.924411		12.2	3	3	0.980584	-0.00851501	4.9432	4	12.5	3	3	1.1725	0.0691129	32.281	3	12.5	3	3	1.1649	0.0662886	28.922	3
	1783	Tb927.7.5840	Tb927.7.5840		hypothetical protein, conserved	26.164	14	0	40.847	1		1.12111	0.0496481	0.119148	0.923914		13.5	3	3	1.03961	0.0168701	9.8426	3	13.5	3	3	1.0539	0.0227994	6.7962	3	9.6	3	3	1.2861	0.109275	9.3695	3
	1150	Tb927.2.380	Tb927.2.380		retrotransposon hot spot protein 2 (RHS2), putative	90.713	18.6	0	7.6724	1		1.06045	0.0254906	0.119208	0.923694		15.1	12	1	0.996016	-0.00173371	NaN	1	15.2	14	2	1.0638	0.02686	2.2373	3	16.5	13	2	1.1255	0.0513455	4.3606	2
	1544	Tb927.6.1440	Tb927.6.1440		hypothetical protein, conserved	29.996	34.1	0	62.575	1		1.14729	0.0596751	0.11926	0.923506		34.1	8	8	1.24148	0.0939398	10.288	8	30.6	7	7	0.97244	-0.0121372	7.107	7	34.1	8	8	1.2509	0.0972226	16.588	6
	2080	Tb927.9.13920;Tb927.9.13880;Tb927.9.13820	Tb927.9.13920;Tb927.9.13880;Tb927.9.13820	KMP-11	kinetoplastid membrane protein KMP-11 (KMP-11) ;unspecified product ;kinetoplastid membrane protein KMP-11	11.076	91.3	0	160.56	3		1.05767	0.024349	0.11958	0.922343		91.3	16	16	0.995322	-0.0020364	35.808	45	91.3	16	16	1.0626	0.0263698	17.995	45	91.3	16	16	1.1187	0.0487136	61.405	39
	1897	Tb927.8.3250	Tb927.8.3250		dynein heavy chain, putative	537.36	0.9	0	6.1411	1		1.14147	0.0574628	0.119719	0.921835		0.7	2	2	1.094	0.0390158	15.733	3	0.7	2	2	1.0204	0.00877045	8.4223	2	0.9	3	3	1.3323	0.124602	17.735	3
	939	Tb927.11.3530	Tb927.11.3530		hypothetical protein, conserved	26.464	24	0	16.89	1		1.05952	0.0251093	0.120004	0.920805		24	8	8	1.13107	0.0534888	23.399	14	24	9	9	1.0036	0.00156065	17.203	11	23.6	7	7	1.0478	0.0202784	15.105	11
	2160	Tb927.9.5700	Tb927.9.5700		hypothetical protein, conserved	238.85	1	0	4.192	1		1.06754	0.0283845	0.120029	0.920713		0.4	1	1	1.02359	0.0101277	13.662	2	1	2	2	1.0288	0.012331	14.158	3	0.4	1	1	1.1553	0.0626948	NaN	1
	1334	Tb927.4.1360	Tb927.4.1360		hypothetical protein, conserved	32.547	39.9	0	49.754	1		1.06496	0.0273335	0.120977	0.917296		39.9	8	8	0.993049	-0.00302947	18.86	10	39.9	8	8	1.0734	0.0307616	8.7037	10	39.9	8	8	1.1331	0.0542682	15.627	10
	1056	Tb927.11.7190	Tb927.11.7190		hypothetical protein	24.904	8.7	0	4.9908	1		1.12738	0.0520703	0.121023	0.917131		4.1	1	1	0.98561	-0.00629486	NaN	1	8.7	2	2	1.1478	0.0598662	6.0728	2	8.7	2	2	1.2666	0.102639	21.3	3
	910	Tb927.11.2690	Tb927.11.2690		succinyl-coA:3-ketoacid-coenzyme A transferase, mitochondrial precursor, putative	53.096	41	0	323.31	1	1	1.06132	0.0258477	0.121084	0.916914		40	17	17	1.00658	0.00284961	17.607	22	41	18	18	1.0441	0.0187421	16.963	23	40	18	18	1.1375	0.0559514	16.469	24
	1479	Tb927.5.2890	Tb927.5.2890		hypothetical protein, conserved	236.85	3.9	0	22.888	1	1	1.30498	0.115605	0.12111	0.916821		2.2	4	4	1.01893	0.0081451	14.6	3	2.4	5	5	1.2319	0.0905755	16.051	5	2.4	4	4	1.7705	0.248096	32.867	5
	1457	Tb927.5.2080	Tb927.5.2080		guanosine monophosphate reductase, putative	52.238	41.8	0	213.91	1		1.0703	0.0295035	0.121293	0.916166		37.3	14	14	0.998104	-0.000824377	9.5685	16	41.8	16	16	1.0664	0.0279201	19.54	18	41.8	16	16	1.1519	0.0614148	13.83	21
	1780	Tb927.7.5790	Tb927.7.5790		protein disulfide isomerase, putative	15.401	14.8	0	5.3414	1		0.959066	-0.0181515	0.121573	0.915164		14.8	2	2	0.958313	-0.0184925	13.246	3	14.8	2	2	0.91796	-0.0371762	19.776	4	14.8	2	2	1.0028	0.00121433	13.653	2
	1790	Tb927.7.6340	Tb927.7.6340		hypothetical protein, conserved	48.093	3.8	0	3.6523	1		1.0623	0.0262485	0.121723	0.914628		3.8	2	2	1.00669	0.0028977	2.1308	2	3.8	2	2	1.1402	0.056981	2.264	3	3.8	2	2	1.0444	0.0188669	15.786	3
	465	Tb927.10.1960	Tb927.10.1960		hypothetical protein, conserved	83.438	6.6	0	18.766	1		1.14875	0.0602254	0.122017	0.913579		4.8	3	3	1.0741	0.0310457	2.6986	3	6.6	4	4	1.0379	0.0161555	43.636	4	5.2	3	3	1.3598	0.133475	14.399	2
	2032	Tb927.9.11110	Tb927.9.11110		PRP8 protein homologue,U5 snRNA-associated splicing factor	277	1.5	0	35.607	1		1.05197	0.0220035	0.122442	0.91207		1.5	3	3	0.988533	-0.00500882	9.8296	3	1.5	3	3	1.0862	0.0359098	17.823	3	1.5	3	3	1.0842	0.0351094	1.1941	2
	1117	Tb927.11.9900	Tb927.11.9900		phytoene synthase, putative	61.763	6	0.001004	2.9605	1	1	1.38967	0.142912	0.122583	0.911571		3.8	1	1	0.933968	-0.0296678	NaN	1	6	2	2	1.5886	0.201015	16.987	2	3.8	1	1	1.8088	0.257391	NaN	1
	247	Tb927.1.2320	Tb927.1.2320		hypothetical protein, conserved	32.51	11.2	0	13.916	1	1	1.16655	0.0669023	0.122672	0.911255		11.2	3	3	1.29341	0.111736	13.385	4	11.2	3	3	0.96551	-0.0152432	16.311	4	11.2	3	3	1.2712	0.104214	21.967	4
	644	Tb927.10.8940	Tb927.10.8940		hypothetical protein, conserved	45.398	75.4	0	323.31	1		1.08602	0.0358361	0.123633	0.907866		74.5	27	27	1.11309	0.0465303	13.707	92	72.7	26	26	0.98455	-0.00676222	17.5	108	68.4	26	26	1.1688	0.0677402	15.43	125
	1177	Tb927.2.5030	Tb927.2.5030		transcription initiation protein, putative	79.801	2.1	0	3.9666	1		1.08802	0.0366386	0.123806	0.907258		2.1	1	1	1.05105	0.0216232	NaN	1	0	0	0				0	2.1	1	1	1.1263	0.0516541	NaN	1
	385	Tb927.10.1390	Tb927.10.1390		hypoxanthine-guanine phosphoribosyltransferase, putative	26.36	66.2	0	151.95	1		1.05221	0.022102	0.12382	0.90721		66.2	14	14	1.05858	0.0247245	23.247	24	66.2	14	14	0.99357	-0.00280153	8.6993	21	62.4	12	12	1.1076	0.0443829	11.164	20
	1842	Tb927.8.1510	Tb927.8.1510		ATP-dependent DEAD/H RNA helicase, putative	62.439	50.4	0	180.13	1		1.06608	0.0277905	0.123963	0.906708		46.6	25	25	1.01774	0.0076365	18.014	75	47.3	23	23	1.032	0.0136797	16.423	77	44.3	23	23	1.1536	0.0620552	16.253	79
	1003	Tb927.11.5460	Tb927.11.5460		hypothetical protein, conserved	23.411	10.9	0	23.283	1		1.07376	0.0309065	0.124513	0.904784		6.4	1	1	0.991867	-0.00354669	4.7782	2	6.4	1	1	1.0799	0.0333835	0.2237	2	10.9	2	2	1.1558	0.0628827	3.9575	2
	2053	Tb927.9.12360	Tb927.9.12360	RBP35	RNA-binding protein, putative (RBP35)	61.658	6.1	0	4.6956	1		1.06012	0.0253571	0.12458	0.904551		3.2	2	2	1.08219	0.0343045	24.542	2	6.1	3	3	1.1145	0.0470801	16.534	5	6.1	3	3	0.98784	-0.00531339	10.85	3
	1856	Tb927.8.1960	Tb927.8.1960		hypothetical protein, conserved	48.425	21.4	0	51.288	1		1.09812	0.0406483	0.12472	0.904064		21.4	8	8	0.980681	-0.00847242	11.681	10	18.9	7	7	1.1341	0.0546514	12.604	7	15	6	6	1.1906	0.0757659	17.51	9
	750	Tb927.11.12520	Tb927.11.12520		hypothetical protein, conserved	37.925	16.1	0	5.6456	1		1.16669	0.0669548	0.12504	0.902952		11.6	2	2	1.27275	0.104743	7.8919	2	16.1	3	3	0.96283	-0.0164504	4.31	3	16.1	3	3	1.2959	0.112571	11.514	3
	1064	Tb927.11.7600	Tb927.11.7600		hypothetical protein, conserved	29.317	36.8	0	33.223	1		1.08588	0.0357822	0.125203	0.902384		36.8	9	9	1.05289	0.0223816	14.085	15	36.8	9	9	1.0129	0.00556657	32.24	21	34.5	8	8	1.2006	0.0793983	24.589	21
	2187	Tb927.9.7250	Tb927.9.7250		hypothetical protein, conserved	20.911	21.9	0	4.3499	1		1.05363	0.0226896	0.125218	0.902333		21.9	2	2	1.00168	0.000730228	7.022	2	21.9	2	2	1.0427	0.0181594	3.3762	2	21.9	2	2	1.1199	0.0491792	2.2346	2
	402	Tb927.10.1450	Tb927.10.1450		hypothetical protein, conserved	329.64	35.2	0	93.122	1		1.05451	0.0230517	0.125268	0.902161		29.5	5	5	1.12244	0.0501613	7.271	5	34.9	5	5	1.0025	0.00108438	45.548	6	35.2	6	6	1.0421	0.0179094	20.553	5
	1200	Tb927.3.1290	Tb927.3.1290		cullin 4B, putative	105.84	28.4	0	129.17	1		1.08255	0.0344498	0.125545	0.9012		27.2	23	23	0.981451	-0.00813156	44.785	43	26.3	22	22	1.1218	0.0499154	47.035	32	28.4	24	24	1.1523	0.0615656	64.567	34
	964	Tb927.11.4370	Tb927.11.4370		hypothetical protein, conserved	24.411	24.4	0	169.01	1		1.07065	0.0296477	0.125694	0.900687		24.4	5	5	1.10223	0.042273	10.947	6	24.4	5	5	0.98422	-0.00690781	18.76	5	24.4	5	5	1.1313	0.0535778	82.551	5
	1549	Tb927.6.1610	Tb927.6.1610		ribosomal RNA adenine dimethylase family protein, conserved	38.752	3.2	0	4.3604	1		1.34786	0.129643	0.12626	0.898734		3.2	1	1	1.08012	0.0334734	NaN	1	3.2	1	1	1.1583	0.0638211	NaN	1	3.2	1	1	1.9572	0.291635	NaN	1
	225	Tb927.11.11330;Tb11.v5.1035;Tb11.v5.1034;Tb927.11.11290	Tb927.11.11330;Tb11.v5.1035		heat shock protein 70 ;heat shock protein 70 (hsp70), putative	71.408	62.2	0	323.31	4		1.11996	0.0492011	0.126322	0.898522		61.6	40	37	0.971534	-0.012542	28.624	64	57.9	36	33	1.2116	0.0833593	17.27	62	57.9	38	35	1.1934	0.076786	38.237	71
	1291	Tb927.3.4990	Tb927.3.4990		oxidoreductase, putative	36.432	58.1	0	272.61	1	1	1.07364	0.0308571	0.126471	0.89801		56.3	25	25	0.986193	-0.00603795	15.08	59	49.6	25	25	1.0935	0.0388188	14.403	67	58.1	26	26	1.1476	0.0597905	15.152	69
	796	Tb927.11.14170	Tb927.11.14170		hypothetical protein, conserved	67.163	6.1	0	26.807	1		1.13623	0.0554652	0.126583	0.897624		6.1	3	3	0.977995	-0.00966332	11.568	4	6.1	3	3	1.1646	0.0661768	7.236	3	3.1	2	2	1.2879	0.109882	15.31	3
	1552	Tb927.6.1700	Tb927.6.1700		hypothetical protein, conserved	22.082	20.5	0	13.794	1	1	1.12377	0.0506792	0.12704	0.896059		14.7	3	3	1.1226	0.0502247	15.086	5	20.5	4	4	0.98966	-0.00451398	16.732	5	20.5	4	4	1.2774	0.106327	11.029	4
	1331	Tb927.4.1280	Tb927.4.1280		hypothetical protein, conserved	43.863	7	0	4.4066	1	1	1.21682	0.0852252	0.127071	0.895954		3.5	1	1	1.55282	0.191121	NaN	1	7	3	3	1.0365	0.0155693	2.7872	5	3.5	2	2	1.1194	0.0489853	15.947	3
	2000	Tb927.8.7510	Tb927.8.7510		p-nitrophenylphosphatase, putative	41.687	5.4	0	5.0019	1		1.09825	0.0407023	0.127224	0.895429		5.4	2	2	0.982415	-0.00770511	18.921	3	5.4	2	2	1.1215	0.0497993	10.815	4	5.4	2	2	1.2023	0.0800128	2.0088	2
	1966	Tb927.8.6060	Tb927.8.6060		2-amino-3-ketobutyrate coenzyme A ligase, putative,glycine acetyltransferase, putative	43.734	29	0	55.204	1		1.04333	0.018422	0.127549	0.894321		16.3	4	4	1.06605	0.0277786	23.104	10	29	7	7	1.0771	0.032256	15.212	15	29	7	7	0.98908	-0.00476858	15.264	10
	1333	Tb927.4.1340	Tb927.4.1340	CPSF3	cleavage and polyadenylation specificity factor subunit, putative (CPSF3)	85.313	1.7	0.0061205	2.2729	1		1.17413	0.069717	0.127684	0.893865		1.7	1	1	1.35369	0.13152	NaN	1	1.7	1	1	0.96406	-0.0158959	NaN	1	1.7	1	1	1.2403	0.0935267	NaN	1
	1924	Tb927.8.4610	Tb927.8.4610	Trab1	small GTP-binding protein Rab1 (Trab1)	24.018	33.9	0	17.976	1		1.1488	0.0602429	0.127824	0.893388		28.9	5	4	1.2507	0.0971544	24.274	4	19.7	4	3	0.96344	-0.0161753	32.983	3	28.9	5	4	1.2582	0.0997497	62.08	5
	1994	Tb927.8.7260	Tb927.8.7260		kinetoplast-associated protein, putative	114.45	8.9	0	40.487	1		1.11325	0.0465918	0.127888	0.89317		8	5	5	1.16139	0.0649767	16.984	11	8	5	5	0.97437	-0.0112761	17.836	9	8.9	6	6	1.2192	0.086075	9.8221	9
	932	Tb927.11.3300	Tb927.11.3300		hypothetical protein, conserved	107.86	27.9	0	155.5	1		1.07783	0.0325505	0.127992	0.892817		27.4	28	28	1.00881	0.00380804	25.06	59	27.6	28	28	1.05	0.0211893	38.372	63	26.5	28	28	1.1821	0.0726542	25.18	60
	1863	Tb927.8.2160	Tb927.8.2160	PGPA	multidrug resistance protein A,p-glycoprotein (PGPA)	174.68	12.8	0	83.376	1		1.09326	0.0387249	0.128118	0.892392		9.7	14	14	1.02422	0.0103945	31.096	14	11	15	15	1.0424	0.0180344	12.523	12	10.5	15	15	1.2239	0.0877459	15.388	17
	1879	Tb927.8.2630	Tb927.8.2630		kinesin, putative	85.189	2.3	0	3.1414	1		1.16286	0.0655266	0.128375	0.89152		2.3	1	1	1.04182	0.0177921	NaN	1	2.3	1	1	1.4081	0.148633	NaN	1	2.3	1	1	1.0719	0.0301543	NaN	1
	1157	Tb927.2.4110	Tb927.2.4110		mitochondrial processing peptidase alpha subunit, putative,metallo-peptidase, Clan ME, Family M16	52.064	3	0	6.3034	1	1	1.22623	0.0885704	0.128856	0.889894		3	1	1	1.12362	0.0506198	NaN	1	3	1	1	1.3382	0.126521	NaN	1	0	0	0				0
	645	Tb927.10.8950;Tb927.10.8970	Tb927.10.8950;Tb927.10.8970		kinetoplast DNA-associated protein, putative ;kinetoplast DNA-associated protein, putative	14.183	25.4	0	24.069	2	1	1.06261	0.0263733	0.128944	0.889598		23.8	5	5	1.02338	0.0100388	22.786	9	23.8	5	5	1.021	0.00902574	10.485	10	25.4	6	6	1.1483	0.0600554	30.17	11
	929	Tb927.11.3270	Tb927.11.3270		squalene monooxygenase, putative	63.81	11.9	0	16.572	1		1.05662	0.0239176	0.129106	0.889052		11.9	5	5	0.987752	-0.00535214	13.026	5	11.9	5	5	1.1123	0.0462219	4.3977	5	7.4	3	3	1.0737	0.030883	16.104	3
	2069	Tb927.9.13320	Tb927.9.13320		hypothetical protein, conserved	55.399	8.1	0	8.3358	1		1.21138	0.0832796	0.129194	0.888757		8.1	3	3	0.952562	-0.0211066	61.264	3	8.1	3	3	1.3093	0.117039	31.25	3	5.7	2	2	1.4253	0.153906	46.76	2
	1946	Tb927.8.5420	Tb927.8.5420		hypothetical protein, conserved	46.375	6.3	0	3.3435	1	1	1.43018	0.15539	0.129286	0.888447		6.3	2	2	1.00137	0.000595391	28.191	3	6.3	2	2	1.3324	0.124635	37.024	2	6.3	2	2	2.1925	0.34094	39.445	2
	832	Tb927.11.15820	Tb927.11.15820		superoxide dismutase, putative	36.047	27.8	0	204.01	1	1	1.11263	0.0463509	0.129429	0.887969		27.8	7	7	1.16862	0.0676734	10.45	8	27.8	7	7	0.97207	-0.0123025	28.327	7	23	5	5	1.2125	0.0836817	22.058	6
	794	Tb927.11.14100	Tb927.11.14100	DRBD4	DRBD4 (DRBD4)	54.707	29.5	0	123.68	1		1.08186	0.03417	0.129592	0.887422		29.5	11	11	0.989218	-0.0047082	23.6	23	29.5	11	11	1.0867	0.0361097	25.292	32	29.5	11	11	1.1779	0.0711084	21.363	29
	1023	Tb927.11.6210	Tb927.11.6210	CYP51	sterol 14-alpha-demethylase (CYP51)	54.372	21.6	0	77.836	1		1.03138	0.0134184	0.129675	0.887144		20.2	9	9	0.993049	-0.00302947	30.667	8	21.6	10	10	1.0618	0.0260427	27.088	11	17.5	8	8	1.0405	0.0172421	19.271	11
	1360	Tb927.4.2450	Tb927.4.2450		thioredoxin, putative	44.49	13.6	0	59.57	1		1.12636	0.0516758	0.129998	0.886063		13.6	4	4	0.989413	-0.00462227	19.935	4	13.6	4	4	1.1202	0.0492956	8.7579	4	9.7	3	3	1.2893	0.110354	23.037	5
	2113	Tb927.9.2120	Tb927.9.2120		hypothetical protein, conserved	30.605	5.4	0	3.7951	1		0.946319	-0.0239623	0.13019	0.885421		5.4	1	1	0.900739	-0.0454012	NaN	1	5.4	1	1	0.92803	-0.032438	NaN	1	5.4	1	1	1.0138	0.00595229	NaN	1
	1319	Tb927.3.790	Tb927.3.790	ZC3H6	ZFP family member, putative (ZC3H6)	38.651	5.3	0	6.9991	1		1.25355	0.0981421	0.13075	0.883559		5.3	1	1	0.936768	-0.0283679	NaN	1	5.3	1	1	1.4292	0.155093	NaN	1	5.3	1	1	1.4713	0.167701	NaN	1
	1055	Tb927.11.7140	Tb927.11.7140		cell cycle sequence binding phosphoprotein (RBP45), putative	35.476	7.3	0	4.5382	1		1.20661	0.0815664	0.130909	0.883031		4.2	1	1	1.0263	0.0112761	NaN	1	4.2	1	1	1.1186	0.0486748	NaN	1	7.3	2	2	1.5302	0.184748	11.734	2
	1524	Tb927.5.560	Tb927.5.560		hypothetical protein, conserved	57.756	5.5	0	9.7815	1	1	1.57516	0.197324	0.130912	0.883022		3.2	1	1	0.9176	-0.0373468	NaN	1	5.5	2	2	1.6912	0.228195	11.063	2	5.5	2	2	2.5184	0.401125	14.194	2
	2067	Tb927.9.13280	Tb927.9.13280	DRBD10	RNA-binding protein, putative (DRBD10)	47.47	4.7	0	3.9488	1		0.952088	-0.021323	0.131072	0.882492		4.7	1	1	1.00693	0.00299827	NaN	1	4.7	1	1	0.95014	-0.0222124	NaN	1	4.7	1	1	0.90208	-0.0447549	NaN	1
	2090	Tb927.9.14470	Tb927.9.14470		ubiquitin carboxyl-terminal hydrolase, putative,cysteine peptidase, Clan CA, family C19, putative	132.38	2.7	0.0024826	2.8373	1		4.47745	0.651031	0.131292	0.881761		0	0	0				0	2.7	2	2	2.3236	0.366161	99.229	2	1.7	1	1	8.6278	0.9359	NaN	1
	1209	Tb927.3.1690	Tb927.3.1690		hypothetical protein, conserved	17.154	55.9	0	72.766	1	1	1.09762	0.0404515	0.13149	0.881107		55.9	9	9	1.16008	0.0644877	60.121	13	55.9	10	10	0.97286	-0.0119497	17.158	12	55.9	9	9	1.1717	0.0688164	9.979	10
	382	Tb927.10.13810	Tb927.10.13810		hypothetical protein, conserved	12.955	21.2	0	30.313	1	1	1.13381	0.0545385	0.131602	0.880736		11.5	1	1	1.26408	0.101774	15.805	2	21.2	2	2	0.96666	-0.0147263	NaN	1	21.2	2	2	1.1928	0.0765676	2.0243	3
	1624	Tb927.6.4340	Tb927.6.4340	TbLSm5	U6 snRNA-associated Sm-like protein LSm5p (TbLSm5)	12.791	34.2	0	39.033	1		0.876296	-0.0573494	0.13198	0.87949		22.2	2	2	0.766284	-0.115611	20.361	4	34.2	3	3	1.0283	0.0121198	8.9043	3	34.2	3	3	0.85397	-0.0685574	20.587	3
	867	Tb927.11.16830	Tb927.11.16830	RABL5	Rab-like 5, small G protein (RABL5)	24.466	16	0	6.6595	1		1.11808	0.0484714	0.132069	0.879197		16	3	3	0.967118	-0.0145205	8.832	3	16	3	3	1.2101	0.0828213	15.448	3	16	3	3	1.1943	0.0771134	18.923	4
	1244	Tb927.3.3100	Tb927.3.3100		peptidyl-prolyl cis-trans isomerase NIMA-interacting 4, putative	13.077	8.2	0	4.4705	1		0.983536	-0.00720989	0.13223	0.878671		8.2	1	1	0.963391	-0.0161974	NaN	1	8.2	1	1	0.98838	-0.00507605	13.948	2	8.2	1	1	0.99918	-0.000356268	NaN	1
	771	Tb927.11.13300	Tb927.11.13300		hypothetical protein, conserved	16.922	16	0	5.9537	1		1.12424	0.0508608	0.132283	0.878495		7.1	1	1	1.00268	0.00116112	NaN	1	16	2	2	1.0908	0.0377451	NaN	1	16	2	2	1.2992	0.113676	13.017	2
	2163	Tb927.9.5890	Tb927.9.5890		solanesyl-diphosphate synthase, putative	39.253	13.9	0	16.845	1	1	1.1357	0.0552654	0.132502	0.877777		10	3	3	1.18818	0.074884	12.62	3	13.9	4	4	0.96687	-0.0146319	18.383	6	10	3	3	1.2751	0.105544	6.2346	3
	1720	Tb927.7.340	Tb927.7.340		hypothetical protein, conserved	36.438	5.8	0	10.785	1		1.07643	0.0319849	0.132843	0.87666		5.8	1	1	1.03948	0.0168159	NaN	1	5.8	1	1	1.0135	0.00582375	NaN	1	5.8	1	1	1.1839	0.073315	NaN	1
	1029	Tb927.11.6320	Tb927.11.6320		MRB1-associated protein	53.267	3.4	0	24.313	1		1.04941	0.0209443	0.133416	0.874791		0	0	0				0	3.4	1	1	1.0722	0.0302758	NaN	1	3.4	1	1	1.0271	0.0116127	2.5961	2
	579	Tb927.10.6220	Tb927.10.6220	XRND	5-3 exoribonuclease 2, putative (XRND)	90.941	2.5	0	3.9836	1		1.13645	0.055549	0.133455	0.874664		1	1	1	0.961538	-0.0170333	NaN	1	2.5	2	2	1.2193	0.0861106	24.002	2	1	1	1	1.2519	0.0975696	NaN	1
	2012	Tb927.8.920	Tb927.8.920		ubiquitin-conjugating enzyme E2, putative,ubiquitin-protein ligase, putative,ubiquitin carrier protein, putative	18.992	7	0	3.946	1		1.11118	0.0457855	0.133804	0.873531		7	1	1	1.13706	0.0557839	5.9909	2	7	1	1	0.97584	-0.0106214	8.5873	2	7	1	1	1.2365	0.0921941	2.9807	2
	1404	Tb927.4.4640	Tb927.4.4640		hypothetical protein, conserved	21.728	6	0	4.0373	1	1	1.21755	0.0854857	0.133918	0.873162		6	1	1	1.24544	0.0953223	NaN	1	6	1	1	0.96281	-0.0164594	3.6817	2	6	1	1	1.5052	0.177594	12.14	2
	1156	Tb927.2.4090	Tb927.2.4090		hypothetical protein, conserved	29.38	8.1	0	10.545	1		1.06092	0.0256834	0.134198	0.872253		3.7	1	1	0.98174	-0.00800367	NaN	1	8.1	2	2	1.0957	0.0396917	7.5565	2	8.1	2	2	1.1101	0.0453621	2.5808	2
	841	Tb927.11.16090	Tb927.11.16090	DC2	outer dynein arm docking complex, putative (DC2)	72.145	2.2	0	9.229	1		1.25166	0.0974865	0.134256	0.872065		2.2	1	1	1.09902	0.0410063	21.438	2	2.2	1	1	1.0611	0.0257563	NaN	1	2.2	1	1	1.6815	0.225697	42.727	2
	1784	Tb927.7.5940;Tb927.7.5950;Tb927.7.5930;Tb927.7.5990;Tb927.7.5970;Tb927.7.6000;Tb927.7.5980;Tb927.7.5960	Tb927.7.5940;Tb927.7.5950;Tb927.7.5930;Tb927.7.5990;Tb927.7.5970	TbPAD2	Protein Associated with Differentiation (TbPAD2) ;protein associated with differentiation 3, putative ;Protein Associated with Differentiation (TbPAD1) ;protein associated with differentiation 7, putative ;protein associated with differentiation 5, putativ	67.151	9.8	0	27.906	8		1.05759	0.0243184	0.135134	0.869236		9.8	4	4	1.04314	0.0183445	17.007	4	9.8	4	4	0.99973	-0.000117275	14.173	4	9.8	4	4	1.1343	0.0547279	8.1313	4
	821	Tb927.11.15230	Tb927.11.15230		cytosolic coat protein, putative	25.564	44.7	0	71.895	1		1.10667	0.0440175	0.135505	0.868045		37.3	6	6	1.07158	0.0300253	13.844	11	41.7	8	8	1.0043	0.00186346	18.496	10	44.7	9	9	1.2594	0.100164	22.006	10
	419	Tb927.10.14950	Tb927.10.14950	ZC3H40	RNA binding protein, putative,zinc finger protein family member, putative (ZC3H40)	46.194	12.3	0	10.568	1		1.13345	0.0544021	0.135516	0.86801		12.3	4	4	0.96918	-0.0135955	21.455	4	10.6	3	3	1.2869	0.109545	26.316	4	7.2	2	2	1.1675	0.0672569	16.241	4
	292	Tb927.10.10120	Tb927.10.10120		hypothetical protein, conserved	63.236	8.9	0	164.52	1	1	1.0915	0.0380254	0.13553	0.867965		8.9	3	3	0.984058	-0.00697919	15.534	4	8.9	3	3	1.0982	0.0406814	7.5453	4	8.9	3	3	1.2033	0.0803739	7.1122	6
	601	Tb927.10.7380	Tb927.10.7380		hypothetical protein, conserved	39.706	15.2	0	11.796	1	1	1.16792	0.0674139	0.135646	0.867592		12	3	3	1.42878	0.154964	12.699	3	15.2	4	4	1.0166	0.00715011	18.698	3	12	3	3	1.0968	0.0401274	10.654	3
	1386	Tb927.4.3850	Tb927.4.3850		hypothetical protein, conserved	49.106	3.1	0	6.2551	1		1.07424	0.0311005	0.135796	0.867113		3.1	1	1	1.16531	0.0664419	NaN	1	3.1	1	1	1.0766	0.0320544	NaN	1	3.1	1	1	0.98811	-0.00519471	NaN	1
	1860	Tb927.8.2010	Tb927.8.2010		hypothetical protein, conserved	21.332	43	0	32.001	1		1.07121	0.0298742	0.135913	0.86674		31.2	6	6	0.980392	-0.00860017	10.513	6	33.3	6	6	1.0975	0.0404045	11.198	5	43	8	8	1.1424	0.0578182	57.368	8
	1749	Tb927.7.4170	Tb927.7.4170		fatty acid elongase, putative	30.493	14	0	17.121	1		1.09095	0.0378051	0.136264	0.865619		14	3	3	1.18751	0.0746363	12.817	4	14	3	3	0.97625	-0.010439	3.0098	3	8.5	2	2	1.12	0.049218	9.5937	3
	1261	Tb927.3.3580	Tb927.3.3580	LPG3	lipophosphoglycan biosynthetic protein, putative (LPG3)	87.766	18.1	0	36.308	1		1.05031	0.0213175	0.136591	0.864579		18	10	10	1.00925	0.00400085	23.997	11	18.1	11	11	1.0242	0.0103848	10.309	13	18.1	11	11	1.1209	0.0495669	12.111	12
	688	Tb927.11.10220	Tb927.11.10220		hypothetical protein, conserved	12.738	28.8	0	12.391	1		1.08884	0.0369623	0.136757	0.86405		28.8	3	3	1.10248	0.0423688	10.249	6	28.8	3	3	0.98106	-0.00830443	6.4441	6	28.8	3	3	1.1935	0.0768224	12.531	6
	1573	Tb927.6.2340;Tb927.6.2280	Tb927.6.2340;Tb927.6.2280		hypothetical protein, conserved ;hypothetical protein, conserved	16.282	16.5	0.00050607	3.0275	2		1.08851	0.0368315	0.137063	0.86308		6.5	1	1	1.00713	0.00308574	10.326	2	6.5	1	1	1.0532	0.0225109	6.6962	2	16.5	2	2	1.2159	0.0848979	1.5932	2
	640	Tb927.10.8720	Tb927.10.8720		CCR4-NOT transcription complex subunit 10, putative	61.501	9.9	0	40.654	1		1.15591	0.0629226	0.137182	0.862702		7.4	4	4	0.984252	-0.00689371	32.189	6	8.5	4	4	1.1397	0.0567905	13.316	3	9.9	5	5	1.3768	0.138871	22.814	8
	1848	Tb927.8.1770	Tb927.8.1770		hypothetical protein, conserved	59.483	4.4	0.0038835	2.5472	1	1	1.48483	0.171677	0.137345	0.862188		4.4	2	2	0.873515	-0.0587296	110.34	2	1.5	1	1	1.9511	0.29028	NaN	1	1.5	1	1	1.9208	0.283482	NaN	1
	900	Tb927.11.2470	Tb927.11.2470		aminopeptidase, putative,metallo-peptidase, Clan MF, Family M17	60.585	6.4	0	6.951	1		1.66989	0.222687	0.139145	0.856534		0	0	0				0	6.4	2	2	1.3141	0.118628	11.839	2	4.2	1	1	2.122	0.326745	NaN	1
	1340	Tb927.4.1540	Tb927.4.1540		hypothetical protein, conserved	55.24	20.7	0	52.289	1		1.10697	0.0441359	0.139155	0.8565		20.3	6	6	1.11846	0.0486188	28.325	8	20.7	7	7	0.97767	-0.00980771	16.029	14	20.7	7	7	1.2405	0.0935968	21.21	12
	1862	Tb927.8.2100	Tb927.8.2100		vacuolar ATP synthase 16 kDa proteolipid subunit, putative	16.868	9.1	0.0038741	2.5415	1		1.15689	0.0632925	0.139299	0.856052		9.1	1	1	0.971817	-0.0124154	15.543	2	9.1	1	1	1.164	0.065953	6.0872	2	9.1	1	1	1.3688	0.13634	18.883	2
	1246	Tb927.3.3130	Tb927.3.3130		hypothetical protein, conserved	178.08	22.4	0	234.67	1		1.06259	0.0263652	0.139811	0.854458		21.1	30	30	1.06575	0.0276537	15.394	46	20.4	30	30	0.98776	-0.00534856	20.42	48	19.2	27	27	1.1397	0.0567905	14.725	41
	857	Tb927.11.16550	Tb927.11.16550	ZC3H46	zinc finger protein family member, putative (ZC3H46)	56.434	20	0	25.418	1		1.09433	0.0391496	0.139992	0.853896		20	7	7	1.00921	0.00398332	23.45	8	12.4	5	5	1.2345	0.0914911	33.751	7	17.6	6	6	1.0519	0.0219745	30.937	7
	324	Tb927.10.11660	Tb927.10.11660		hypothetical protein, conserved	44.436	2.8	0	5.6278	1		0.849528	-0.0708223	0.140586	0.852058		2.8	1	1	0.868432	-0.0612639	NaN	1	2.8	1	1	1.0183	0.00787574	1.1201	2	2.8	1	1	0.6933	-0.159079	NaN	1
	2101	Tb927.9.15290	Tb927.9.15290		hypothetical protein, conserved	149.76	15.8	0	85.743	1		1.06966	0.0292455	0.140909	0.851062		13.4	14	14	0.97561	-0.0107239	19.122	17	12.8	15	15	1.1265	0.0517312	26.822	12	11.5	13	13	1.1136	0.0467292	17.902	17
	1193	Tb927.2.820	Tb927.2.820		retrotransposon hot spot protein (RHS, pseudogene), putative,retrotransposon hot spot protein 1 (RHS1), interrupted	60.527	20.3	0	57.571	1	1	1.20073	0.0794448	0.140977	0.850852		15.6	8	2	0.936768	-0.0283679	8.2568	2	18.6	9	3	1.4017	0.146655	14.866	2	15.2	8	1	1.3184	0.120047	NaN	1
	2215	Tb927.9.9290	Tb927.9.9290	PABP1	Polyadenylate-binding protein 1 (Poly(A)-binding protein 1) (PABP 1) (PABP1)	63.029	36	0	170.4	1		1.13253	0.05405	0.141178	0.850234		32.3	17	17	0.955749	-0.0196562	23.621	28	32.7	17	17	1.2535	0.0981243	13.927	29	29.3	15	15	1.2125	0.0836817	19.459	34
	1078	Tb927.11.8220	Tb927.11.8220	AUK1	aurora B kinase (AUK1)	35.555	2.9	0.0038629	2.5064	1		0.925522	-0.0336132	0.141395	0.849564		2.9	1	1				0	2.9	1	1	0.89205	-0.0496108	NaN	1	2.9	1	1	0.96025	-0.0176157	NaN	1
	1388	Tb927.4.4070	Tb927.4.4070		mevalonate kinase, putative	35.544	40.1	0	253.33	1		1.08386	0.0349716	0.141446	0.849411		35.3	9	9	0.976944	-0.0101303	9.959	9	40.1	9	9	1.1044	0.0431264	11.492	9	40.1	9	9	1.1801	0.0719188	13.332	9
	467	Tb927.10.200	Tb927.10.200		vacuolar ATP synthase, putative	19.38	7.9	0	11.435	1		1.20249	0.0800812	0.141513	0.849205		7.9	1	1	1.54911	0.190084	56.654	2	7.9	1	1	1.0491	0.0208169	18.276	3	7.9	1	1	1.0699	0.0293432	7.6166	2
	219	Tb11.v5.0897;Tb927.10.13200	Tb11.v5.0897;Tb927.10.13200		hypothetical protein, conserved ;hypothetical protein, conserved	66.644	6.4	0	15.569	2		1.45809	0.163784	0.141691	0.848657		0	0	0				0	6.4	3	3	1.218	0.0856473	39.178	2	3	1	1	1.7455	0.24192	NaN	1
	1707	Tb927.7.2940;Tb927.7.2930;Tb927.7.2920;Tb927.7.2910;Tb927.7.2900;Tb927.7.2890;Tb927.7.2880;Tb927.7.2870;Tb927.7.2860;Tb927.7.2850;Tb927.7.2840;Tb927.7.2830;Tb927.7.2820	Tb927.7.2940;Tb927.7.2930;Tb927.7.2920;Tb927.7.2910;Tb927.7.2900;Tb927.7.2890;Tb927.7.2880;Tb927.7.2870;Tb927.7.2860;Tb927.7.2850;Tb927.7.2840;Tb927.7.2830;Tb927.7.2820		histone H2A, putative ;histone H2A, putative ;histone H2A, putative ;histone H2A, putative ;histone H2A, putative ;histone H2A, putative ;histone H2A, putative ;histone H2A, putative ;histone H2A, putative ;histone H2A, putative ;histone H2A, putative ;his	14.212	26.1	0	35.479	13		1.03528	0.0150568	0.14178	0.848384		26.1	5	5	1.00392	0.00169706	17.904	14	26.1	5	5	1.0851	0.0354698	9.5052	11	26.1	5	5	1.0186	0.00800367	51.208	10
	1218	Tb927.3.1920	Tb927.3.1920	NOT5	NOT5 protein (NOT5)	66.856	6.8	0	9.4842	1		1.15651	0.0631481	0.14265	0.845728		6.8	3	3	0.947239	-0.0235405	10.464	3	5.6	2	2	1.3065	0.116109	4.5305	2	6.8	3	3	1.2499	0.0968753	6.2656	3
	965	Tb927.11.4380	Tb927.11.4380		ATP-dependent RNA helicase, putative,DEAD/DEAH box RNA helicase, putative	248.38	0.8	0.0024765	2.8158	1		1.07512	0.0314551	0.142799	0.845275		0.8	2	2	0.977995	-0.00966332	19.291	4	0.8	2	2	1.0953	0.0395331	13.567	3	0.8	2	2	1.1601	0.0644954	11.643	3
	2218	Tb927.9.9450	Tb927.9.9450	ZC3H28	zinc finger protein family member, putative (ZC3H28)	114.75	12.7	0	34.933	1		1.06702	0.0281731	0.143014	0.844622		12.7	9	9	1.04311	0.0183309	14.163	22	12.7	9	9	1.0008	0.000347297	19.881	22	12.7	9	9	1.1637	0.065841	20.892	23
	109	Tb11.02.5380b;Tb11.02.5380	Tb11.02.5380b;Tb11.02.5380		exosome complex exonuclease RRP44p homologue, putative ;exosome complex exonuclease RRP44p homologue (RRP44)	108.88	1.2	0	8.8605	2		1.4261	0.15415	0.143102	0.844353		1.2	1	1	0.986388	-0.00595229	NaN	1	1.2	1	1	1.2923	0.111363	NaN	1	1.2	1	1	2.2753	0.357039	NaN	1
	1657	Tb927.6.850;Tb11.v5.0689	Tb927.6.850;Tb11.v5.0689		ccr4-not transcription complex subunit 2 ;hypothetical protein, conserved	37.396	13.3	0	15.459	2		1.0664	0.0279195	0.143277	0.843823		13.3	3	3	0.990295	-0.00423537	3.9384	4	13.3	3	3	1.0598	0.0252239	14.558	3	10.6	2	2	1.1555	0.0627699	2.1921	3
	1465	Tb927.5.2370	Tb927.5.2370		hydrolase, alpha/beta fold family, putative	43.296	11	0	31.581	1		1.12951	0.0528889	0.143424	0.843377		7.5	2	2	1.01878	0.00807872	4.6424	3	7.5	2	2	1.0588	0.0248139	33.935	3	11	3	3	1.3359	0.125774	18.462	4
	1599	Tb927.6.3500	Tb927.6.3500		endosomal trafficking protein RME-8, putative	253.87	6.8	0	69.642	1		1.10418	0.0430383	0.143578	0.842911		3.4	7	7	0.982125	-0.00783309	17.748	6	5.3	8	8	1.0993	0.0411162	12.145	6	3.9	8	8	1.2469	0.0958316	17.11	8
	1473	Tb927.5.2650	Tb927.5.2650	GAL/ALO	L-galactonolactone oxidase (GAL/ALO)	58.791	1.7	0	3.2678	1		1.10347	0.04276	0.143732	0.842448		1.7	1	1	1.21058	0.0829937	NaN	1	1.7	1	1	0.96522	-0.0153737	NaN	1	1.7	1	1	1.1499	0.0606601	NaN	1
	1369	Tb927.4.2880	Tb927.4.2880	TbNup225	Nucleoporin (TbNup225)	225.59	4	0	11.93	1		1.11162	0.0459553	0.143746	0.842405		2.8	5	5	0.972668	-0.0120354	12.025	4	3.2	6	6	1.1259	0.0514998	14.444	5	2.7	5	5	1.2543	0.0984014	8.6207	4
	1988	Tb927.8.6830	Tb927.8.6830		kinesin, putative	198.66	1.1	0	3.9246	1		1.10502	0.0433718	0.144177	0.841105		1.1	2	2	0.968804	-0.0137639	17.243	5	1.1	2	2	1.2283	0.0893045	13.333	6	1.1	2	2	1.1339	0.0545748	29.569	3
	1911	Tb927.8.3970	Tb927.8.3970		oxidoreductase, putative	45.637	5.8	0	4.9945	1		1.07708	0.0322485	0.144288	0.84077		5.8	1	1	0.972006	-0.012331	NaN	1	5.8	1	1	1.1192	0.0489077	NaN	1	5.8	1	1	1.1486	0.0601688	NaN	1
	987	Tb927.11.5050	Tb927.11.5050	FHm	fumarate hydratase, class I (FHm)	61.344	15.3	0	26.44	1	1	1.13329	0.0543399	0.144342	0.840609		15.3	6	6	1.30897	0.116929	28.98	9	9.4	4	4	0.96785	-0.0141919	30.207	9	15.3	6	6	1.1489	0.0602822	12.421	7
	490	Tb927.10.2790	Tb927.10.2790		hypothetical protein, conserved	115.48	2.5	0.003876	2.5435	1		1.26608	0.10246	0.144401	0.84043		2.5	2	2	1.09314	0.0386738	40.021	2	1	1	1	1.0551	0.0232936	24.929	2	1	1	1	1.7596	0.245414	NaN	1
	646	Tb927.10.8980	Tb927.10.8980		hypothetical protein, conserved	17.598	39.1	0	22.879	1	1	1.10863	0.0447884	0.144453	0.840273		39.1	6	6	1.25263	0.097823	19.341	8	39.1	6	6	0.97594	-0.0105769	15.4	9	39.1	6	6	1.1146	0.047119	11.797	10
	1900	Tb927.8.3350;Tb11.v5.0792	Tb927.8.3350;Tb11.v5.0792		DNA polymerase theta (helicase domain only), putative ;DNA polymerase theta (helicase domain only), putative	115.09	14.8	0	144.21	2		1.08218	0.0343002	0.14465	0.839681		14.8	12	12	0.968992	-0.0136797	11.263	12	12.6	11	11	1.1394	0.0566762	17.318	13	14.8	12	12	1.1479	0.0599041	25.201	12
	1011	Tb927.11.5780	Tb927.11.5780	MTRNAP	mitochondrial DNA-directed RNA polymerase (MTRNAP)	143.82	2.4	0.0096463	1.9899	1	1	1.94992	0.290016	0.145414	0.837395		1.6	1	1	0.922169	-0.0351895	NaN	1	2.4	2	2	1.7362	0.2396	32.482	2	0.9	1	1	4.6306	0.665637	NaN	1
	1278	Tb927.3.4260	Tb927.3.4260		hypothetical protein, conserved	41.306	22	0	64.113	1	1	1.06476	0.0272521	0.145534	0.837035		19.6	4	4	0.97704	-0.0100878	9.6226	5	22	5	5	1.0924	0.0383817	21.356	6	22	5	5	1.131	0.0534626	22.012	6
	819	Tb927.11.15150	Tb927.11.15150		1-acyl-sn-glycerol-3-phosphate acyltransferase, putative	30.359	24	0	81.007	1		1.08028	0.033535	0.14575	0.836392		24	4	4	0.978474	-0.0094509	12.594	4	24	4	4	1.0916	0.0380635	6.8064	4	20.3	3	3	1.1803	0.0719924	25.853	3
	984	Tb927.11.4980	Tb927.11.4980		ATP-dependent DEAD/H RNA helicase, putative,ATP- dependent RNA helicase, putative	65.274	11	0	37.22	1		1.04378	0.0186103	0.145854	0.836082		9.8	4	4	0.995718	-0.00186346	16.633	8	9.8	4	4	1.0343	0.0146465	19.517	8	11	5	5	1.1042	0.0430477	52.899	7
	424	Tb927.10.1510	Tb927.10.1510	NOT1	NOT1 (NOT1)	259.12	43.1	0	323.31	1		1.06829	0.0286908	0.145879	0.836008		42.4	86	86	0.974944	-0.0110204	28.064	134	42.3	86	86	1.1013	0.0419056	14.108	144	41.3	85	85	1.1355	0.0551871	20.989	145
	761	Tb927.11.13010	Tb927.11.13010		hypothetical protein	22.171	20.9	0	11.747	1		1.07585	0.0317529	0.145985	0.835693		20.9	3	3	1.16073	0.0647296	10.424	5	20.9	3	3	0.97503	-0.010982	11.012	4	20.9	3	3	1.1003	0.0415111	25.079	4
	1859	Tb927.8.2000	Tb927.8.2000	NCP1	cyclophilin, putative (NCP1)	28.482	44.7	0	80.193	1		1.06041	0.0254737	0.146146	0.835214		40.1	9	9	0.990001	-0.00436437	23.556	9	30.5	7	7	1.0544	0.0230054	12.66	11	44.7	10	10	1.1423	0.0577802	19.735	15
	1372	Tb927.4.310	Tb927.4.310		hypothetical protein, conserved	733.52	0.5	0	7.3504	1		1.23336	0.0910882	0.14618	0.835111		0.2	1	1	1.04115	0.0175117	NaN	1	0.5	3	3	1.0877	0.0365091	25.388	3	0.2	1	1	1.6567	0.219244	NaN	1
	321	Tb927.10.11570	Tb927.10.11570		hypothetical protein, conserved	78.596	1.8	0	5.8529	1		0.925683	-0.0335378	0.146609	0.833839		1.8	1	1	0.936593	-0.0284492	NaN	1	1.8	1	1	0.83761	-0.0769581	NaN	1	1.8	1	1	1.0111	0.00479411	NaN	1
	660	Tb927.10.9560	Tb927.10.9560		oxidoreductase, putative	36.099	20.7	0	70.901	1		1.04408	0.0187349	0.146948	0.832835		16.5	4	4	0.984058	-0.00697919	124.33	4	20.7	5	5	1.0612	0.0257972	17.061	6	20.7	5	5	1.0899	0.0373867	16.846	6
	1732	Tb927.7.3750	Tb927.7.3750		TFIIF-stimulated CTD phosphatase, putative	22.571	32.3	0	14.526	1	1	1.05999	0.0253022	0.14699	0.832713		32.3	5	5	1.06836	0.0287195	11.895	6	22.2	4	4	0.98322	-0.0073493	5.0396	5	22.2	4	4	1.1338	0.0545365	11.31	5
	1566	Tb927.6.2150	Tb927.6.2150		cell division cycle protein 16, putative,cell division cycle protein 16 homolog, putative	61.277	3.5	0.0043021	2.4284	1		1.17725	0.0708704	0.147171	0.832176		3.5	1	1				0	3.5	1	1	1.277	0.106191	NaN	1	3.5	1	1	1.0853	0.0355498	NaN	1
	2072	Tb927.9.1350	Tb927.9.1350		hypothetical protein, conserved	59.813	4.1	0	4.7725	1		0.663313	-0.178282	0.147281	0.831852		4.1	2	2	1.02113	0.00907981	8.276	2	4.1	2	2	0.75108	-0.124314	34.165	3	2	1	1	0.38053	-0.419611	NaN	1
	1018	Tb927.11.6010	Tb927.11.6010		hypothetical protein, conserved	17.987	17.1	0	33.349	1		0.917779	-0.037262	0.147528	0.831126		17.1	2	2	0.828912	-0.0814913	12.097	3	17.1	2	2	1.0237	0.0101727	19.304	3	17.1	2	2	0.91103	-0.0404673	39.561	5
	1822	Tb927.7.900	Tb927.7.900		hypothetical protein, conserved	64.798	15.8	0	20.028	1		1.01545	0.00665885	0.148356	0.828696		15.8	5	5	1.02388	0.0102477	20.395	4	13.8	4	4	0.99364	-0.00277093	19.605	3	13.8	4	4	1.0292	0.0124998	10.665	4
	2092	Tb927.9.1470	Tb927.9.1470		hypothetical protein, conserved	17.293	36.5	0	5.6806	1		0.969581	-0.0134158	0.149041	0.826693		31.4	3	3	0.942152	-0.0258791	20.462	4	10.3	2	2	0.95523	-0.019892	178.69	3	14.7	3	3	1.0128	0.00552369	90.119	3
	639	Tb927.10.850	Tb927.10.850		hypothetical protein, conserved	168.3	35.6	0	264.47	1		1.09501	0.0394185	0.149108	0.826498		27	32	32	1.05044	0.0213722	23.112	34	34.1	42	42	1.0046	0.00199317	21.659	48	28.3	34	34	1.2442	0.0948902	34.216	46
	1874	Tb927.8.2500	Tb927.8.2500		ribosomal RNA methyltransferase, putative	28.533	8.2	0	5.4702	1		1.55476	0.191663	0.149177	0.826299		8.2	2	2	2.43778	0.386994	70.504	2	8.2	2	2	1.8279	0.261952	67.643	2	8.2	2	2	0.84342	-0.0739561	10.927	2
	1131	Tb927.2.2410	Tb927.2.2410		hypothetical protein, conserved	71.2	3.2	0	4.096	1		0.926182	-0.0333037	0.14947	0.825447		1.9	1	1	0.937295	-0.0281237	NaN	1	3.2	2	2	0.83726	-0.0771397	31.431	2	1.4	1	1	1.0124	0.00535214	NaN	1
	826	Tb927.11.15430	Tb927.11.15430		U5 small nuclear ribonucleoprotein component, putative,U5 snrnp-specific protein, putative	105.47	1.8	0	5.2376	1		1.22492	0.0881067	0.149819	0.824433		1.8	2	2	1.09104	0.0378391	24.662	2	1.8	2	2	1.0286	0.0122465	9.6821	2	0.7	1	1	1.6377	0.214234	NaN	1
	1958	Tb927.8.5780	Tb927.8.5780		phosphatase of regenerating liver-type phosphatase, putative	19.422	68.8	0	137.24	1		1.05904	0.0249128	0.149843	0.824365		65.3	10	10	0.987264	-0.00556657	15.61	15	65.3	10	10	1.0561	0.023705	18.963	18	68.8	10	10	1.1392	0.0566	14.559	15
	340	Tb927.10.12240	Tb927.10.12240		short-chain dehydrogenase, putative	36.075	51.7	0	261.86	1		1.07838	0.03277	0.150058	0.82374		51.7	10	10	0.974754	-0.011105	9.6984	11	44	9	9	1.095	0.0394141	8.0377	9	44	9	9	1.1749	0.0700009	10.048	10
	589	Tb927.10.6810	Tb927.10.6810		guanylate kinase, putative	29.956	64.4	0	320.84	1		1.06661	0.0280052	0.150151	0.823471		60.2	17	17	1.00566	0.00245199	17.906	42	58	18	18	1.0319	0.0136376	14.578	37	64.4	19	19	1.1693	0.0679259	19.699	45
	496	Tb927.10.3030;Tb927.10.2980	Tb927.10.3030;Tb927.10.2980	RPN11	proteasome regulatory non-ATPase subunit 11,19S proteasome regulatory subunit, Metallo-peptidase, Clan MP, Family M67 (RPN11) ;proteasome regulatory non-ATPase subunit 11,19S proteasome regulatory subunit, Metallo-peptidase, Clan MP, Family M67 (RPN11)	33.847	9.5	0	4.7809	2		1.11114	0.0457669	0.15031	0.823012		9.5	2	2	0.954381	-0.0202784	7.8631	2	4.3	1	1	1.1902	0.0756199	NaN	1	4.3	1	1	1.2077	0.0819591	NaN	1
	258	Tb927.1.3070	Tb927.1.3070		hypothetical protein, conserved	44.99	33.7	0	64.912	1		1.07795	0.0325988	0.150602	0.822169		33.7	9	9	0.975039	-0.010978	39.492	19	29.8	8	8	1.0932	0.0386996	28.946	16	23.2	7	7	1.1751	0.0700748	17.724	15
	625	Tb927.10.8080	Tb927.10.8080		hypothetical protein, conserved	82.38	4.9	0	45.181	1		1.2158	0.0848624	0.150629	0.822092		4.9	2	2	0.998203	-0.000781027	6.1926	2	4.9	2	2	1.1256	0.0513841	4.9275	2	2.4	1	1	1.5995	0.203984	NaN	1
	354	Tb927.10.12630	Tb927.10.12630		hypothetical protein, conserved	25.138	5.5	0	14.446	1		1.30133	0.114388	0.150935	0.821211		5.5	1	1	0.888178	-0.0514998	NaN	1	5.5	1	1	1.5822	0.199261	NaN	1	5.5	1	1	1.5682	0.195401	NaN	1
	1655	Tb927.6.740	Tb927.6.740		ATP-dependent DEAH-box RNA helicase, putative	139.08	10	0	54.182	1		1.10504	0.0433763	0.150985	0.821066		5.7	6	6	0.979816	-0.00885556	15.979	7	10	10	10	1.2586	0.0998877	41.487	10	8.4	8	8	1.0942	0.0390967	21.779	8
	2115	Tb927.9.2220	Tb927.9.2220		SUMO1/Ulp2, putative	82.914	1.6	0	3.6299	1		1.18138	0.0723914	0.151188	0.820482		1.6	1	1	1.05556	0.023485	NaN	1	1.6	1	1	1.0381	0.0162392	NaN	1	1.6	1	1	1.5047	0.17745	NaN	1
	1425	Tb927.4.870	Tb927.4.870		dynein heavy chain, putative	527.12	1.1	0	8.1958	1		1.09104	0.0378426	0.151191	0.820474		0.8	3	2	1.10919	0.0450054	33.475	2	0.7	3	2	0.97066	-0.0129329	17.991	2	1.1	4	3	1.2063	0.0814553	23.885	3
	1961	Tb927.8.5860	Tb927.8.5860		50S ribosomal protein L17, putative	35.06	3.7	0.0024618	2.7321	1	1	1.20028	0.0792837	0.151479	0.819647		0	0	0				0	3.7	1	1	1.0925	0.0384214	NaN	1	3.7	1	1	1.3187	0.120146	NaN	1
	2028	Tb927.9.10770	Tb927.9.10770	PABP2	Polyadenylate-binding protein 2 (Poly(A)-binding protein 2) (Poly(A)-binding protein II) (PABII) (Polyadenylate-binding nuclear protein 1) (Nuclear poly(A)-binding protein 1) (PABP2), putative (PABP2)	62.147	60.4	0	323.31	1		1.0719	0.0301523	0.151625	0.81923		60.4	34	34	0.975039	-0.010978	11.924	83	60.4	34	34	1.09	0.0374265	19.081	102	60.4	34	34	1.1588	0.0640085	17.263	103
	2112	Tb927.9.2100	Tb927.9.2100		hypothetical protein, conserved	46.715	11.6	0	18.08	1		1.08951	0.0372326	0.152052	0.818008		9.2	3	3	0.984931	-0.00659439	3.6594	3	9.2	3	3	1.2217	0.0869646	6.4522	3	11.6	4	4	1.0748	0.0313277	17.098	4
	344	Tb927.10.12330	Tb927.10.12330	ZC3H34	zinc finger protein family member, putative (ZC3H34)	22.365	38.1	0	25.098	1		1.0266	0.0114006	0.152069	0.81796		38.1	7	7	1.06663	0.0280148	11.278	9	36.1	7	7	1.0053	0.00229568	24.748	11	38.1	8	8	1.009	0.00389117	12.946	10
	1517	Tb927.5.4290	Tb927.5.4290		hypothetical protein, conserved	40.083	22.4	0	45.046	1		1.13303	0.0542419	0.15272	0.816104		16.9	5	5	1.01118	0.00483006	17.995	4	16.9	5	5	1.0594	0.02506	34.244	4	22.4	6	6	1.3578	0.132836	4.7075	4
	368	Tb927.10.13180	Tb927.10.13180		hypothetical protein, conserved	136.67	2.3	0	11.775	1		1.09648	0.040001	0.152802	0.81587		2.3	2	2	1.12435	0.0509029	14.245	3	2.3	2	2	0.96531	-0.0153332	7.244	4	2.3	2	2	1.2146	0.0844333	10.827	3
	272	Tb927.1.4420	Tb927.1.4420		ABC transporter, putative	104.68	4	0	6.0052	1		1.10617	0.0438236	0.153149	0.814887		2.9	2	2	1.06572	0.0276444	52.409	3	4	3	3	0.99535	-0.00202418	88.269	3	2.9	2	2	1.276	0.105851	79.383	3
	2200	Tb927.9.8290	Tb927.9.8290		hypothetical protein, conserved	25.114	14.7	0	3.3732	1	1	2.87522	0.458671	0.153295	0.814472		14.7	2	2	13.3542	1.12562	315.07	2	11	1	1	1.0983	0.040721	NaN	1	14.7	2	2	1.6206	0.209676	NaN	1
	312	Tb927.10.11220	Tb927.10.11220	PSSA-2	procyclic form surface phosphoprotein (PSSA-2)	46.04	8.9	0	6.3586	1		1.23959	0.0932795	0.153322	0.814396		4.9	1	1	1.34014	0.127151	NaN	1	4.9	1	1	0.91473	-0.0387071	NaN	1	8.9	2	2	1.5538	0.191395	58.756	2
	1132	Tb927.2.2430	Tb927.2.2430	CK2A2	casein kinase II, alpha chain (CK2A2)	43.288	30.4	0	91.218	1		1.07302	0.030608	0.153449	0.814035		21.2	7	7	0.976372	-0.0103848	16.833	13	27.4	8	8	1.1674	0.0672197	19.251	13	30.4	10	10	1.0839	0.0349892	15.385	10
	2057	Tb927.9.12630;Tb927.9.12590;Tb927.9.12570;Tb927.9.12610;Tb927.9.12550	Tb927.9.12630;Tb927.9.12590;Tb927.9.12570;Tb927.9.12610;Tb927.9.12550	glk1	glycerol kinase, glycosomal (glk1) ;glycerol kinase, glycosomal (glk1) ;glycerol kinase, glycosomal (glk1) ;glycerol kinase, glycosomal (glk1) ;glycerol kinase, glycosomal (glk1)	56.426	65	0	323.31	5		1.0393	0.0167399	0.153495	0.813905		65	31	31	0.983381	-0.00727825	12.816	55	64.8	31	31	1.0801	0.033464	12.154	67	59	30	30	1.0569	0.0240339	20.369	68
	815	Tb927.11.15000	Tb927.11.15000	TbSMN	survival of motor neuron (SMN)-like protein (TbSMN)	17.026	15.9	0	36.058	1		0.942117	-0.0258951	0.153913	0.812726		15.9	2	2	0.99167	-0.00363284	7.4796	2	15.9	2	2	0.86319	-0.0638936	29.049	2	15.9	2	2	0.97688	-0.0101588	24.13	2
	982	Tb927.11.4910	Tb927.11.4910		predicted ankyrin repeat family protein	43.647	10.2	0	11.636	1		1.11067	0.0455838	0.154463	0.811176		7.1	3	3	0.980584	-0.00851501	12.02	3	7.4	3	3	1.2808	0.107481	11.572	3	10.2	4	4	1.0909	0.0377849	7.48	4
	2006	Tb927.8.7790	Tb927.8.7790		hypothetical protein, conserved	13.063	10.7	0	3.3513	1		1.11176	0.0460111	0.154498	0.811076		10.7	1	1	0.954381	-0.0202784	3.8188	2	10.7	1	1	1.1635	0.0657664	NaN	1	10.7	1	1	1.2375	0.0925452	0.28933	2
	1545	Tb927.6.1470	Tb927.6.1470		hypothetical protein, conserved	27.521	32.7	0	33.376	1		1.0498	0.0211053	0.155174	0.80918		31.8	10	10	0.976944	-0.0101303	12.628	20	32.7	11	11	1.0827	0.0345081	26.539	24	32.7	11	11	1.0938	0.0389379	11.34	24
	1239	Tb927.3.2810	Tb927.3.2810		hypothetical protein, conserved	181.77	1.9	0	13.819	1	1	1.11881	0.0487546	0.155354	0.808676		1.9	3	3	1.30722	0.11635	24.248	3	1.9	3	3	0.98249	-0.00767186	28.838	3	1.9	3	3	1.0904	0.0375858	17.424	3
	577	Tb927.10.6190	Tb927.10.6190	ALDH	aldehyde dehydrogenase, putative (ALDH)	54.033	39.6	0	185.65	1	1	1.06133	0.0258522	0.155557	0.808111		39.6	15	15	1.02803	0.0120077	14.71	17	37.2	14	14	1.0039	0.00169045	28.206	18	32.8	13	13	1.1584	0.0638585	6.9854	17
	1115	Tb927.11.9820	Tb927.11.9820		hypothetical protein, conserved	64.425	7.4	0	8.5919	1		1.02749	0.0117777	0.155794	0.80745		5.8	3	3	0.988924	-0.00483706	50.085	4	5.7	3	3	1.0592	0.024978	31.548	3	1.9	1	1	1.0356	0.015192	NaN	1
	1762	Tb927.7.4950	Tb927.7.4950		NAD(p)-dependent steroid dehydrogenase-like protein	45.186	8.9	0	3.4597	1		1.0548	0.0231721	0.155986	0.806916		3	1	1	1.10586	0.0437019	NaN	1	5	2	1	1.0889	0.036988	NaN	1	8.9	3	1	0.9746	-0.0111736	NaN	1
	92	Tb927.5.4420;Tb05.5K5.70	Tb927.5.4420;Tb05.5K5.70		nucleolar RNA helicase II, putative,nucleolar RNA helicase Gu, putative ;nucleolar RNA helicase II, putative,nucleolar RNA helicase Gu, putative,BAC from homologous region on chr5	68.786	61.6	0	323.31	2		1.04304	0.0183019	0.155992	0.806896		61.6	35	35	0.982801	-0.00753442	10.54	48	57.6	34	34	1.0558	0.0235817	10.121	44	57.6	34	34	1.0936	0.0388585	12.251	44
	1742	Tb927.7.3980	Tb927.7.3980		immunodominant antigen, putative,tc40 antigen-like	97.32	19.6	0	131.46	1		1.07903	0.0330343	0.156223	0.806254		17.7	14	14	0.964878	-0.0155274	21.512	21	19.6	15	15	1.1214	0.0497606	14.539	25	17	13	13	1.1611	0.0648696	24.688	23
	357	Tb927.10.12710	Tb927.10.12710		heat shock protein 110, putative	90.863	14.7	0	23.535	1		1.15093	0.0610496	0.156223	0.806254		11.6	7	7	0.940026	-0.02686	26.244	6	14.7	9	9	1.3365	0.125969	29.849	6	11.3	7	7	1.2135	0.0840398	12.324	7
	1124	Tb927.2.1680;Tb927.2.1560	Tb927.2.1680;Tb927.2.1560		cyclophilin-type peptidyl-prolyl cis-trans isomerase, putative ;cyclophilin-type peptidyl-prolyl cis-trans isomerase, putative	21.165	34.7	0	74.847	2	1	1.06902	0.0289843	0.156543	0.805367		26.5	3	3	1.09125	0.0379244	18.511	4	23	4	4	0.97222	-0.0122354	12.196	4	23	4	4	1.1515	0.0612639	18.384	3
	877	Tb927.11.1980	Tb927.11.1980	ZC3H41	zinc finger protein family member, putative (ZC3H41)	58.459	30.4	0	65.493	1		1.0874	0.03639	0.156617	0.805161		25.5	12	12	0.960707	-0.017409	17.846	16	28	13	13	1.1767	0.0706658	14.192	20	30.4	14	14	1.1374	0.0559132	22.798	21
	1724	Tb927.7.3440;Tb927.7.3450	Tb927.7.3440		I/6 autoantigen	27.05	23.2	0	39.277	2		0.886921	-0.052115	0.156751	0.804788		23.2	3	3	1.04443	0.0188794	19.749	3	23.2	3	3	0.76608	-0.115726	21.81	3	23.2	3	3	0.87197	-0.0594985	19.22	3
	1366	Tb927.4.2740	Tb927.4.2740		hypothetical protein, conserved	16.327	39.3	0	34.953	1		1.04858	0.0206014	0.156772	0.804731		39.3	5	5	0.98561	-0.00629486	7.8683	6	39.3	5	5	1.1147	0.047158	6.2082	6	16.7	2	2	1.0494	0.0209411	5.5816	4
	1166	Tb927.2.4520	Tb927.2.4520		hypothetical protein, conserved	143.93	1	0	3.1888	1		0.771583	-0.112617	0.156859	0.804491		0	0	0				0	1	1	1	0.67129	-0.17309	NaN	1	1	1	1	0.88686	-0.0521449	NaN	1
	1394	Tb927.4.4350	Tb927.4.4350		hypothetical protein, conserved	23.321	32.5	0	50.649	1		1.07638	0.0319639	0.156872	0.804454		17.2	3	3	0.967024	-0.0145625	9.3442	3	27.1	4	4	1.11	0.045323	8.4831	6	22.7	4	4	1.1618	0.0651314	26.078	5
	1974	Tb927.8.6250	Tb927.8.6250		hypothetical protein, conserved	75.474	1.6	0	12.188	1		1.0794	0.0331834	0.157364	0.803094		1.6	1	1	0.970309	-0.0130901	NaN	1	1.6	1	1	1.097	0.0402066	NaN	1	1.6	1	1	1.1815	0.0724337	NaN	1
	927	Tb927.11.3250	Tb927.11.3250		dynein heavy chain, putative	531.18	7.1	0	100.52	1		1.03589	0.0153142	0.157632	0.802355		5.4	22	21	0.991768	-0.00358977	26.427	16	5.5	24	23	1.0312	0.0133429	16.368	19	6.1	25	24	1.0869	0.0361896	40.836	19
	537	Tb927.10.4760	Tb927.10.4760		hypothetical protein, conserved	27.159	7.4	0	3.2393	1		1.08295	0.0346071	0.158294	0.800535		7.4	2	2	1.18509	0.0737502	10.627	2	7.4	2	2	0.9661	-0.0149779	15.529	2	7.4	2	2	1.1093	0.045049	6.8542	3
	1515	Tb927.5.4260;Tb927.5.4250;Tb927.5.4240;Tb927.5.4230;Tb927.5.4220;Tb927.5.4210;Tb927.5.4200;Tb927.5.4190;Tb927.5.4180;Tb927.5.4170;Tb927.2.2670	Tb927.5.4260;Tb927.5.4250;Tb927.5.4240;Tb927.5.4230;Tb927.5.4220;Tb927.5.4210;Tb927.5.4200;Tb927.5.4190;Tb927.5.4180;Tb927.5.4170		histone H4, putative ;histone H4, putative ;histone H4, putative ;histone H4, putative ;histone H4, putative ;histone H4, putative ;histone H4, putative ;histone H4, putative ;histone H4, putative ;histone H4, putative	11.142	48	0	61.359	11		1.03386	0.0144604	0.158743	0.799306		44	8	8	1.00946	0.00408852	18.912	21	44	8	8	1.0873	0.0363494	15.859	20	48	9	9	1.0068	0.00294321	14.526	20
	473	Tb927.10.2240	Tb927.10.2240		hypothetical protein, conserved	66.352	37.2	0	171.31	1		1.05578	0.023573	0.158912	0.798844		37.2	21	21	0.980584	-0.00851501	61.399	55	32.7	18	18	1.0617	0.0260018	17.445	44	37.2	21	21	1.1304	0.0532321	38.755	41
	1734	Tb927.7.3880	Tb927.7.3880		protein kinase, putative	87.072	3.6	0	7.3371	1		0.825608	-0.083226	0.159783	0.79647		3.6	2	2	0.917179	-0.037546	6.5067	2	2.2	1	1	0.74318	-0.128906	NaN	1	2.2	1	1				0
	1083	Tb927.11.8700	Tb927.11.8700		hypothetical protein, conserved	65.26	3.8	0.0010076	2.987	1	1	1.33527	0.125569	0.159889	0.796182		3.8	1	1	0.862664	-0.0641584	NaN	1	3.8	1	1	1.746	0.242044	NaN	1	3.8	1	1	1.5806	0.198822	NaN	1
	1053	Tb927.11.7050	Tb927.11.7050		hypothetical protein, conserved	17.077	10.6	0.0015008	2.9117	1		0.851692	-0.0697176	0.160072	0.795683		10.6	1	1	0.730247	-0.13653	NaN	1	10.6	1	1	0.77988	-0.107972	NaN	1	10.6	1	1	1.0848	0.0353497	NaN	1
	387	Tb927.10.13980	Tb927.10.13980		hypothetical protein, conserved	23.575	25.7	0	9.1274	1		1.10726	0.0442477	0.160364	0.794892		25.7	4	4	0.968335	-0.0139742	3.8932	3	15.5	3	3	1.1056	0.043598	5.146	2	15.5	3	3	1.268	0.103119	8.5249	2
	585	Tb927.10.6630	Tb927.10.6630	HEL64	ATP-dependent DEAD/H RNA helicase HEL64, putative (HEL64)	64.082	39.3	0	133.96	1		1.08517	0.0354983	0.160599	0.794257		38	21	21	1.11162	0.0459554	23.866	30	35.2	20	20	0.96409	-0.0158824	12.396	28	39.3	22	22	1.1924	0.076422	22.357	34
	681	Tb927.11.10070	Tb927.11.10070		hypothetical protein, conserved	25.415	21.3	0	44.078	1		1.03893	0.0165872	0.160961	0.79328		21.3	4	4	1.00019	8.25238e-05	13.288	4	21.3	4	4	1.0188	0.00808894	14.412	4	17.6	3	3	1.1005	0.04159	17.338	3
	468	Tb927.10.2010	Tb927.10.2010	HK1	hexokinase (HK1)	51.295	56.3	0	323.31	1		1.03773	0.0160856	0.161091	0.792928		51.8	24	1	0.994926	-0.00220927	12.076	2	55.4	27	1	1.0254	0.0108933	3.0562	2	56.3	28	1	1.0954	0.0395727	8.3599	2
	146	Tb927.10.6320;Tb11.v5.0274	Tb927.10.6320;Tb11.v5.0274		hypothetical protein, conserved ;hypothetical protein, conserved	68.143	3.8	0.0043165	2.4472	2		1.05079	0.0215151	0.16182	0.790969		3.8	2	2	0.990982	-0.00393421	15.765	2	3.8	2	2	1.0372	0.0158625	27.463	2	3.8	2	2	1.1288	0.052617	18.863	2
	1710	Tb927.7.3040	Tb927.7.3040		hypothetical protein, conserved	69.073	8.8	0	144.26	1		1.07576	0.0317173	0.162099	0.790219		8.8	5	5	0.963484	-0.0161555	19.591	11	8.8	5	5	1.1141	0.0469242	15.955	11	8.8	5	5	1.1598	0.0643831	34.237	8
	296	Tb927.10.10340;Tb11.v5.0811	Tb927.10.10340;Tb11.v5.0811	SMC2	structural maintenance of chromosome 2, putative (SMC2) ;structural maintenance of chromosome 2, putative	134	2.4	0	65.868	2	1	1.1186	0.0486747	0.162357	0.78953		2.4	2	2	1.30468	0.115505	11.932	2	2.4	2	2	0.96701	-0.014569	33.696	2	2.4	2	2	1.1094	0.0450882	5.1321	2
	1353	Tb927.4.2130	Tb927.4.2130		hypothetical protein, conserved	34.796	35.8	0	308.32	1		1.06121	0.0258006	0.162815	0.788305		35.8	14	14	0.967961	-0.0141424	13.426	14	35.8	14	14	1.1093	0.045049	19.05	18	35.8	14	14	1.113	0.0464952	15.799	17
	1910	Tb927.8.3950	Tb927.8.3950		hypothetical protein, conserved	102.13	4.5	0	15.536	1		1.10541	0.0435253	0.164159	0.784736		2.4	2	2	1.10762	0.0443892	1.1401	2	4.5	4	4	0.9645	-0.0156978	38.613	6	3.4	3	3	1.2644	0.101884	27.222	5
	2014	Tb927.9.10010	Tb927.9.10010		chaperone protein DNAj, putative	56.711	11.6	0	14.143	1		1.03366	0.0143782	0.164768	0.783128		10.2	4	4	1.03515	0.0150049	6.9902	4	11.6	5	5	0.98761	-0.00541452	14.295	4	10.2	4	4	1.0803	0.0335444	20.088	4
	2045	Tb927.9.11840	Tb927.9.11840		hypothetical protein, conserved	24.075	42.4	0	49.609	1		1.06875	0.0288767	0.165013	0.782482		41	8	8	0.966557	-0.0147725	8.4539	8	41	9	9	1.0974	0.040365	32.553	12	42.4	8	8	1.1509	0.0610376	19.895	10
	1033	Tb927.11.6390	Tb927.11.6390		hypothetical protein, conserved	32.852	10.6	0	11.034	1		1.11143	0.0458838	0.165052	0.78238		10.6	3	3	0.941974	-0.0259609	3.9662	3	10.6	3	3	1.2151	0.084612	16.918	3	10.6	3	3	1.1995	0.0790003	5.8863	3
	1234	Tb927.3.2440	Tb927.3.2440		serine/threonine-protein kinase, putative,protein kinase, putative	45.811	9.6	0	23.898	1		1.08503	0.0354399	0.165595	0.780954		7.1	2	2	0.958681	-0.0183259	22.911	5	9.6	3	3	1.1212	0.0496831	31.932	6	9.6	3	3	1.1884	0.0749626	8.116	4
	426	Tb927.10.15170	Tb927.10.15170		hypothetical protein, conserved	77.347	7.2	0	25.736	1		1.08075	0.0337238	0.165705	0.780664		7.2	3	3	1.09903	0.0410111	8.8919	3	2.4	1	1	0.96511	-0.0154232	NaN	1	4.7	2	2	1.1901	0.0755835	NaN	1
	1547	Tb927.6.1520	Tb927.6.1520	AQP1	aquaporin 3, putative (AQP1)	35.066	13.1	0	7.3806	1		1.1064	0.0439141	0.167419	0.776196		13.1	2	2	0.943396	-0.0253059	10.558	2	3.7	1	1	1.1785	0.0713296	0.35084	2	3.7	1	1	1.2182	0.0857186	1.084	2
	1063	Tb927.11.7500;Tb927.11.7490	Tb927.11.7500;Tb927.11.7490		hypothetical protein, conserved ;hypothetical protein, conserved	13.594	7.8	0	3.2869	2		1.16487	0.0662789	0.16775	0.775337		7.8	1	1	1.00217	0.000943443	3.8527	2	7.8	1	1	1.4811	0.170584	21.052	3	7.8	1	1	1.0649	0.0273088	NaN	1
	1698	Tb927.7.2670	Tb927.7.2670	ZC3H21	zinc finger protein family member, putative (ZC3H21)	49.686	36.2	0	35.624	1		1.13508	0.0550276	0.167792	0.775228		34.1	10	7	0.929973	-0.0315296	24.025	7	30.6	9	6	1.2871	0.109612	19.9	7	33.6	10	7	1.2218	0.0870001	16.27	8
	1616	Tb927.6.410	Tb927.6.410		hypothetical protein, conserved	93.965	2.2	0	3.52	1		1.16018	0.0645244	0.167822	0.77515		0.8	1	1	0.917852	-0.0372272	16.772	2	2.2	2	2	1.3403	0.127202	26.506	2	2.2	2	2	1.2694	0.103598	20.661	4
	215	Tb11.v5.0837;Tb927.10.2900	Tb11.v5.0837;Tb927.10.2900		importin beta-1 subunit, putative ;importin beta-1 subunit, putative	63.469	10.3	0	45.861	2		1.08848	0.0368214	0.168233	0.774088		7.1	3	3	0.951565	-0.0215614	16.85	4	7.3	3	3	1.1787	0.0714033	23.739	4	4.2	2	2	1.1498	0.0606223	5.071	2
	486	Tb927.10.2560	Tb927.10.2560	mMDH	mitochondrial malate dehydrogenase (mMDH)	33.188	89.3	0	300.08	1		1.08587	0.0357771	0.16824	0.774069		87.4	21	21	0.952472	-0.0211479	12.736	56	80.2	19	19	1.1682	0.0675172	12.376	60	89.3	23	23	1.1507	0.0609621	51.948	81
	310	Tb927.10.11150	Tb927.10.11150		hypothetical protein, conserved	25.436	39.4	0	94.306	1		1.13522	0.0550818	0.168411	0.77363		31	5	5	0.929714	-0.0316508	9.0071	9	31	5	5	1.219	0.0860037	5.4671	7	39.4	6	6	1.2909	0.110893	10.309	6
	594	Tb927.10.7060	Tb927.10.7060		nucleoporin interacting component (NUP93), putative	96.511	1.2	0	11.746	1		1.08912	0.0370773	0.168824	0.772567		1.2	1	1	1.09593	0.0397814	NaN	1	1.2	1	1	0.96475	-0.0155852	15.125	2	1.2	1	1	1.2219	0.0870357	NaN	1
	176	Tb11.v5.0489;Tb11.v5.1020;Tb11.v5.0294;Tb11.0050;Tb927.4.290;Tb927.4.280;Tb927.4.270;Tb927.4.260;Tb927.4.300;Tb927.7.1970;Tb927.7.1960;Tb927.7.1950;Tb927.7.2000;Tb927.7.1990;Tb927.7.1980;Tb927.4.240	Tb11.v5.0489		retrotransposon hot spot (RHS) protein, putative	65.818	38.7	0	24.51	16		1.18075	0.0721591	0.168919	0.772322		32.3	19	1	0.942774	-0.0255926	NaN	1	38.7	23	1	1.1689	0.0677774	NaN	1	35.6	22	1	1.4938	0.174292	NaN	1
	1006	Tb927.11.5520	Tb927.11.5520	TIM	triosephosphate isomerase (TIM)	26.819	64	0	193.59	1		1.06547	0.0275421	0.169472	0.770902		64	15	15	0.962464	-0.0166155	14.424	23	63.6	15	15	1.1162	0.047742	14.778	25	64	16	16	1.1259	0.0514998	16.843	25
	1076	Tb927.11.8190	Tb927.11.8190	RAD51	RAD51 protein (RAD51)	40.719	14.2	0	28.87	1		0.963726	-0.0160462	0.169715	0.770281		14.2	3	3	0.923105	-0.0347487	22.7	6	14.2	4	4	1.0202	0.00868532	33.488	5	8	2	2	0.95044	-0.0220753	31.957	3
	273	Tb927.1.4490	Tb927.1.4490		acetyltransferase, putative	19.682	48.3	0	77.819	1		1.04355	0.0185128	0.17032	0.768734		36.6	8	8	1.10302	0.0425843	16.002	13	48.3	10	10	0.97991	-0.00881381	33.784	13	48.3	9	9	1.0514	0.021768	7.509	11
	2158	Tb927.9.5590	Tb927.9.5590	TOP2	DNA topoisomerase ii (TOP2)	137.56	0.8	0.0043269	2.4603	1	1	1.16741	0.0672229	0.17037	0.768607		0.8	1	1	1.49564	0.174827	NaN	1	0.8	1	1	1.0592	0.024978	NaN	1	0.8	1	1	1.0043	0.00186346	43.827	2
	1024	Tb927.11.6230	Tb927.11.6230		pretranslocation protein, alpha subunit, putative,SEC61-like (pretranslocation process) protein, putative	53.647	17.7	0	59.101	1		1.05112	0.0216508	0.171382	0.766036		15.4	6	6	1.05322	0.0225188	7.3366	7	17.7	7	7	0.97908	-0.00918182	8.8799	7	15.2	6	6	1.1262	0.0516155	9.6156	6
	1052	Tb927.11.7040	Tb927.11.7040		pterin-4-alpha-carbinolamine dehydratase, putative	14.237	41.9	0	20.584	1	1	1.04845	0.020547	0.171888	0.764754		34.7	4	4	0.976276	-0.0104272	11.484	5	41.9	5	5	1.0597	0.0251829	12.932	7	36.3	4	4	1.114	0.0468852	12.328	5
	327	Tb927.10.11820	Tb927.10.11820		hypothetical protein, conserved	39.072	6	0	4.284	1	1	1.48438	0.171545	0.173367	0.761033		6	1	1	1.88565	0.275462	NaN	1	6	1	1	1.1685	0.0676287	NaN	1	0	0	0				0
	91	Tb927.5.4410;Tb05.5K5.60	Tb927.5.4410;Tb05.5K5.60		hypothetical protein, conserved ;hypothetical protein, conserved,BAC from homologous region on chr5	23.593	8.3	0	9.8026	2		0.958984	-0.0181886	0.174074	0.759265		8.3	1	1	0.934842	-0.029262	NaN	1	8.3	1	1	0.98375	-0.00711525	NaN	1	0	0	0				0
	1249	Tb927.3.3180;Tb11.v5.0584	Tb927.3.3180;Tb11.v5.0584	TbNup98	Nucleoporin (TbNup98) ;hypothetical protein, conserved	98.143	31.7	0	35.092	2		1.06702	0.0281728	0.17488	0.757261		30.3	5	5	0.968523	-0.0138901	14.311	5	30.6	6	6	1.0763	0.0319333	20.428	9	29.2	4	4	1.1654	0.066475	18.944	9
	1448	Tb927.5.1760	Tb927.5.1760		hypothetical protein, conserved	72.635	2.9	0	6.2989	1		0.76877	-0.114204	0.175082	0.756757		2.9	1	1	0.603828	-0.219087	NaN	1	2.9	1	1	1.1866	0.0743043	NaN	1	2.9	1	1	0.63412	-0.197829	NaN	1
	995	Tb927.11.530	Tb927.11.530	RBP3	RNA-binding protein, putative (RBP3)	22.331	16.5	0	5.2068	1		1.11583	0.0475966	0.175249	0.756345		5	1	1	0.940557	-0.026615	NaN	1	16.5	3	3	1.1528	0.061754	33.213	3	16.5	3	3	1.2813	0.107651	12.268	3
	739	Tb927.11.12150	Tb927.11.12150	BILBO1	flagellar protein essential for flagellar pocket biogenesis (BILBO1)	67.325	21.6	0	41.004	1		1.07263	0.0304512	0.176126	0.754175		21.6	11	11	0.959417	-0.0179927	13.387	14	21.6	11	11	1.1681	0.06748	11.552	14	18.9	10	10	1.1012	0.0418662	21.662	16
	999	Tb927.11.5400	Tb927.11.5400	SRP54	signal recognition particle 54 kDa (SRP54)	53.374	3.5	0.0024839	2.839	1		0.909222	-0.0413303	0.176192	0.754015		3.5	1	1	0.815395	-0.0886321	NaN	1	3.5	1	1	1.0606	0.0255516	NaN	1	3.5	1	1	0.86914	-0.0609103	NaN	1
	1191	Tb927.2.6070	Tb927.2.6070	MRB6070	mitochondrial RNA binding complex 1 subunit (MRB6070)	31.486	23.2	0	49.447	1	1	1.10435	0.0431055	0.176219	0.753948		23.2	5	5	1.12257	0.0502149	15.687	5	23.2	5	5	0.95002	-0.0222673	12.36	5	23.2	5	5	1.2629	0.101369	19.753	9
	1392	Tb927.4.4310	Tb927.4.4310	TbNup64	Nucleoporin (TbNup64)	64.234	5.1	0	4.7649	1		1.14482	0.0587371	0.176229	0.753922		3	2	1	1.27092	0.104119	NaN	1	3	2	1	0.91425	-0.038935	NaN	1	5.1	3	2	1.2913	0.111027	27.572	3
	1646	Tb927.6.5130;Tb927.6.5120	Tb927.6.5130;Tb927.6.5120		60S acidic ribosomal protein P2, putative ;60S acidic ribosomal protein P2, putative	10.444	54.2	0	63.441	2		1.1024	0.0423407	0.176572	0.753079		54.2	9	9	0.937207	-0.0281644	15.205	22	54.2	8	8	1.2041	0.0806626	16.25	20	52.3	8	8	1.1872	0.0745239	32.87	21
	1563	Tb927.6.2070	Tb927.6.2070		hypothetical protein, conserved	21.547	15.9	0	4.6393	1	1	1.23023	0.089987	0.176748	0.752646		10.1	1	1	1.23355	0.0911559	NaN	1	15.9	2	2	0.91065	-0.0406485	20.209	2	10.1	1	1	1.6575	0.219454	NaN	1
	2117	Tb927.9.2390	Tb927.9.2390		hypothetical protein, conserved	22.31	34.8	0	29.69	1		1.07795	0.0326006	0.1769	0.752271		34.8	7	7	0.952653	-0.0210652	30.385	16	34.8	7	7	1.1679	0.0674057	27.522	17	34.8	7	7	1.1258	0.0514612	11.845	18
	618	Tb927.10.7940	Tb927.10.7940		methyltransferase, putative	40.895	34.3	0	86.931	1		1.08944	0.0372035	0.177022	0.751972		30.3	9	9	0.944912	-0.0246088	6.9559	9	31.4	9	9	1.1542	0.0622811	15.419	10	27.3	8	8	1.1856	0.0739382	8.4409	8
	1072	Tb927.11.8050	Tb927.11.8050		hypothetical protein, conserved	60.004	19.3	0	39.126	1		1.03043	0.0130175	0.177094	0.751796		15.3	5	5	0.982415	-0.00770511	10.795	4	15.1	5	5	1.0414	0.0176176	7.4686	4	13.2	5	5	1.0694	0.0291402	10.997	4
	2224	Tb927.9.9730	Tb927.9.9730		hypothetical protein, conserved	44.559	5.5	0	5.9784	1		1.47745	0.169514	0.177906	0.749808		5.5	2	2	2.84309	0.453791	134.25	4	5.5	2	2	1.035	0.0149403	243.82	3	5.5	2	2	1.096	0.0398106	NaN	1
	168	Tb927.10.15390;Tb11.v5.0434	Tb927.10.15390;Tb11.v5.0434		kinesin, putative ;kinesin, putative	123.56	2.9	0.0014993	2.9078	2		1.25553	0.0988264	0.178885	0.747425		1.8	2	1	0.973805	-0.0115282	NaN	1	2.9	3	2	1.1109	0.045675	27.221	2	1.8	2	1	1.8295	0.262332	NaN	1
	1199	Tb927.3.1200	Tb927.3.1200		hypothetical protein, conserved	83.763	1.6	0.0043207	2.4536	1		1.2565	0.0991631	0.179091	0.746927		0	0	0				0	1.6	1	1	1.088	0.0366289	NaN	1	1.6	1	1	1.4511	0.161697	NaN	1
	338	Tb927.10.12180	Tb927.10.12180		hypothetical protein, conserved	77.894	1.6	0	3.1183	1		1.14979	0.0606179	0.179408	0.746157		1.6	1	1	0.957029	-0.0190747	16.861	2	1.6	1	1	1.4336	0.156428	51.105	2	1.6	1	1	1.1079	0.0445006	NaN	1
	1165	Tb927.2.450;Tb927.6.5180	Tb927.2.450		retrotransposon hot spot protein 4 (RHS4), putative	97.997	31.3	0	59.902	2		1.04574	0.0194224	0.179545	0.745827		28.2	23	3	0.969556	-0.0134271	12.541	6	31.3	25	3	1.0822	0.0343075	19.432	3	29.1	23	3	1.0899	0.0373867	7.7704	5
	1872	Tb927.8.2460	Tb927.8.2460		hypothetical protein, conserved	30.901	31.7	0	122.47	1		1.02117	0.00909606	0.179733	0.745372		31.7	5	5	0.992063	-0.00346053	23.788	7	31.7	5	5	1.0547	0.0231289	16.615	6	31.7	5	5	1.0177	0.00761977	16.646	5
	1410	Tb927.4.5120	Tb927.4.5120		hypothetical protein, conserved	155.28	6.5	0	57.771	1	1	1.13248	0.0540292	0.179931	0.744894		5.7	6	6	1.28816	0.10997	15.79	8	6.5	7	7	0.91861	-0.0368688	16.734	9	4.5	5	5	1.2274	0.0889861	27.225	5
	1546	Tb927.6.1500	Tb927.6.1500	DHAP	alkyl-dihydroxyacetone phosphate synthase (DHAP)	69.067	12.7	0	24.22	1		1.13362	0.0544656	0.180725	0.742981		9.8	5	5	1.15019	0.0607704	15.102	6	11.4	5	5	0.93563	-0.0288959	8.5636	5	4.2	3	3	1.3537	0.131522	14.077	4
	1939	Tb927.8.5180	Tb927.8.5180	LSm2	U6 snRNA-associated sm-like protein Lsm2 (LSm2)	13.269	8	0	4.1115	1		2.13245	0.328878	0.180742	0.742942		8	1	1	0.848033	-0.0715875	NaN	1	8	1	1	1.5466	0.189378	NaN	1	8	1	1	7.3934	0.868844	NaN	1
	899	Tb927.11.2430	Tb927.11.2430	DHC1b	Cytoplasmic dynein 2 heavy chain (DYNC2H1), putative,Cytoplasmic dynein 2 heavy chain (DYNC2H2), putative (DHC1b)	484.96	3.6	0	81.759	1		1.06534	0.0274867	0.180917	0.74252		2.7	11	11	0.963763	-0.01603	62.91	10	3.6	14	13	1.0817	0.0341068	14.687	15	2.7	11	11	1.1598	0.0643831	27.813	10
	256	Tb927.1.3030	Tb927.1.3030	KREL2	KREL2 (KREL2)	47.576	7.2	0.0052406	2.3984	1	1	1.27415	0.105222	0.181215	0.741806		5.3	1	1	0.855505	-0.0677774	NaN	1	1.9	1	1	1.4102	0.149281	NaN	1	1.9	1	1	1.7146	0.234163	NaN	1
	866	Tb927.11.1680	Tb927.11.1680		vesicular-fusion protein SEC18, putative	97.907	6.5	0	15.667	1		1.11633	0.0477942	0.181439	0.74127		3.9	4	4	1.17779	0.0710667	46.415	3	6.5	6	6	0.92955	-0.0317272	49.742	6	6.5	6	6	1.2707	0.104043	146.41	5
	2103	Tb927.9.15330	Tb927.9.15330		hypothetical protein, conserved	100.03	8.7	0	13.361	1		1.01694	0.0072943	0.181478	0.741176		4.8	4	4	0.98824	-0.0051376	27.189	4	7.2	5	5	1.0339	0.0144785	13.454	4	2.6	2	2	1.0293	0.012542	33.559	3
	1721	Tb927.7.3410	Tb927.7.3410		centrin, putative	16.552	16.1	0	10.568	1		1.05042	0.0213612	0.181909	0.740146		16.1	4	4	0.966184	-0.0149403	7.5713	5	12.8	3	3	1.0845	0.0352296	8.0579	3	16.1	4	4	1.1061	0.0437944	14.038	4
	1503	Tb927.5.3680	Tb927.5.3680		hypothetical protein, conserved	40.157	6.2	0	4.758	1		1.20095	0.0795259	0.182237	0.739364		3.4	1	1	1.35184	0.130927	NaN	1	6.2	2	2	0.87941	-0.0558086	9.0431	2	3.4	1	1	1.457	0.16346	NaN	1
	1755	Tb927.7.4340	Tb927.7.4340		hypothetical protein, conserved	98.13	5	0	6.301	1		1.1488	0.0602453	0.182334	0.739132		2.1	1	1	0.952381	-0.0211893	NaN	1	5	3	3	1.4334	0.156367	11.816	3	3.5	2	2	1.1106	0.0455577	1.118	2
	1395	Tb927.8.7980;Tb927.4.4380	Tb927.8.7980;Tb927.4.4380	TVP1	vacuolar-type proton translocating pyrophosphatase 1 (TVP1) ;vacuolar-type proton translocating pyrophosphatase 1, putative (PPase1)	86.003	13.6	0	92.143	2		1.09843	0.0407722	0.182881	0.737831		13.6	9	9	1.178	0.0711435	23.398	18	13.6	9	9	0.93474	-0.0293092	12.275	14	13.6	9	9	1.2036	0.0804822	44.712	14
	120	Tb11.1780	Tb11.1780		retrotransposon hot spot protein 1 (RHS1, pseudogene), putative	65.556	14.4	0	63.49	1		1.07705	0.0322358	0.183375	0.736659		14.4	7	5	0.950029	-0.0222634	14.721	13	14.4	7	5	1.1736	0.0695201	13.356	9	14.4	7	5	1.1206	0.0494506	12.889	7
	1197	Tb927.3.1120	Tb927.3.1120	rtb2	GTP-binding nuclear protein rtb2, putative (rtb2)	24.406	67.3	0	220.71	1		1.06266	0.0263931	0.18376	0.73575		62.2	15	15	0.956755	-0.0191994	19.001	39	45.2	12	12	1.1126	0.0463391	15.225	34	67.3	15	15	1.1273	0.0520395	23.377	37
	2085	Tb927.9.14070	Tb927.9.14070		short-chain dehydrogenase, putative	51.103	5.2	0	57.487	1		0.858014	-0.0665055	0.183858	0.735518		5.2	1	1	0.87943	-0.0557987	NaN	1	5.2	1	1	1.0654	0.0275127	NaN	1	5.2	1	1	0.67417	-0.171231	NaN	1
	463	Tb927.10.1900	Tb927.10.1900		DNA topoisomerase IA, putative	88.925	3.5	0	3.9637	1	1	0.889955	-0.0506318	0.183923	0.735363		2.1	1	1	0.960246	-0.0176176	NaN	1	3.5	2	2	0.82481	-0.0836461	127.27	3	1.4	1	1				0
	890	Tb927.11.2260	Tb927.11.2260	eIF4E	eukaryotic translation initiation factor 4e, putative (eIF4E)	26.024	13.7	0	7.0246	1		1.03199	0.0136738	0.184033	0.735104		9.9	2	2	1.05341	0.0225965	8.8352	2	3.9	1	1				0	4.3	1	1	1.011	0.00475116	NaN	1
	1809	Tb927.7.710	Tb927.7.710	HSP70	heat shock 70 kDa protein, putative (HSP70)	70.211	33.5	0	98.656	1		1.06045	0.0254884	0.184043	0.73508		33.5	15	12	0.957946	-0.0186589	26.816	12	33.5	15	12	1.121	0.0496056	13.528	12	30.5	13	10	1.1105	0.0455186	7.673	11
	2151	Tb927.9.5000	Tb927.9.5000		hypothetical protein, conserved	31.326	4.4	0	9.0192	1	1	1.09285	0.038561	0.184248	0.734598		4.4	1	1	1.22776	0.0891142	NaN	1	4.4	1	1	0.94463	-0.0247383	NaN	1	4.4	1	1	1.1254	0.0513069	NaN	1
	1653	Tb927.6.710	Tb927.6.710		dephospho-CoA kinase, putative	26.854	5.8	0	3.9243	1		1.11803	0.0484528	0.184288	0.734503		5.8	1	1	1.34032	0.127209	NaN	1	5.8	1	1	0.9625	-0.0165993	NaN	1	5.8	1	1	1.0833	0.0347487	NaN	1
	1195	Tb927.3.1030	Tb927.3.1030	RPB28	RNA-binding protein (RPB28)	39.272	55.2	0	165.77	1		1.06993	0.0293547	0.184621	0.73372		55.2	16	16	0.956663	-0.019241	12.661	46	52.4	15	15	1.0966	0.0400482	17.641	39	52.4	15	15	1.1675	0.0672569	26	40
	1892	Tb927.8.3140	Tb927.8.3140		NAD dependent deacetylase, putative,SIR2-like protein 4, putative,NAD-dependent deacetylase sirtuin 4, putative	33.545	13.7	0	69.468	1		1.05407	0.0228676	0.185105	0.732582		13.7	3	3	1.14689	0.0595234	24.289	3	13.7	3	3	0.97931	-0.00907981	2.6978	3	13.7	3	3	1.0427	0.0181594	12.923	4
	366	Tb927.10.12960	Tb927.10.12960	RAB5A	ras-related protein rab-5,small GTPase, putative (RAB5A)	24.484	45.2	0	96.347	1		1.11046	0.0455014	0.185272	0.732191		31.7	5	5	0.961538	-0.0170333	21.23	8	36.5	6	6	1.0823	0.0343477	19.768	10	45.2	8	8	1.3158	0.11919	43.44	9
	517	Tb927.10.3640	Tb927.10.3640		hypothetical protein, conserved	31.534	16.2	0	8.8106	1		1.04144	0.0176363	0.185274	0.732186		16.2	4	4	1.06137	0.0258661	15.942	4	16.2	4	4	0.97236	-0.0121729	6.7729	5	16.2	4	4	1.0945	0.0392158	10.757	5
	1960	Tb927.8.5840	Tb927.8.5840		hypothetical protein, conserved	21.534	37.1	0	79.583	1		1.08973	0.0373187	0.18617	0.730089		37.1	5	5	0.955566	-0.0197392	10.719	7	31.5	4	4	1.0916	0.0380635	6.7141	6	31.5	4	4	1.2406	0.0936318	30.319	7
	690	Tb927.11.10340	Tb927.11.10340		phosphoglycerate mutase family member 5, putative	33.783	13.8	0	11.03	1	1	1.17663	0.070641	0.186331	0.729714		13.8	4	4	0.888021	-0.051577	25.052	5	13.8	4	4	1.2988	0.113542	22.622	6	13.8	4	4	1.4124	0.149958	16.451	6
	1348	Tb927.4.2010	Tb927.4.2010	ACBP	acyl-CoA binding protein, putative (ACBP)	10.609	20.4	0	18.704	1		1.07066	0.0296508	0.18636	0.729648		20.4	3	3	1.00975	0.00421568	7.5038	5	20.4	3	3	1.007	0.00302947	9.3184	3	20.4	3	3	1.207	0.0817073	4.8122	3
	1471	Tb927.5.2590	Tb927.5.2590		hypothetical protein, conserved	29.106	6.8	0	13.732	1	1	1.28819	0.10998	0.186474	0.729381		6.8	1	1	1.99314	0.299539	NaN	1	6.8	1	1	0.96112	-0.0172224	NaN	1	6.8	1	1	1.1159	0.0476253	NaN	1
	466	Tb927.10.1990;Tb11.v5.0641	Tb927.10.1990;Tb11.v5.0641	MVP	major vault protein, putative (MVP) ;major vault protein, putative	95.062	17.7	0	99.329	2		1.14813	0.0599905	0.1865	0.72932		13.7	8	8	0.914077	-0.0390173	36.51	7	12.1	7	7	1.383	0.140822	11.008	8	15.9	9	9	1.1972	0.0781667	14.749	9
	708	Tb927.11.1090;Tb927.11.1100;Tb927.11.1110;Tb11.v5.1038;Tb927.11.1130	Tb927.11.1090;Tb927.11.1100;Tb927.11.1110;Tb11.v5.1038		calpain-like protein, putative,cytoskeleton assocociated protein, putative ;calpain, putative,cysteine peptidase, Clan CA, family C2, putative ;calpain, putative ;calpain-like cysteine peptidase, putative	658.93	26.2	0	22.894	5		1.05818	0.0245603	0.186511	0.729296		25.8	7	7	1.13912	0.0565698	13.823	9	25.9	8	8	0.96269	-0.0165135	8.2555	15	25.9	8	8	1.0805	0.0336248	16.563	14
	871	Tb927.11.17000;Tb11.v5.0404	Tb927.11.17000;Tb11.v5.0404		leucine-rich repeat protein (LRRP), putative ;hypothetical protein, conserved	109.72	7.3	0	57.196	2		1.0694	0.0291384	0.186718	0.728814		7.3	5	5	1.01988	0.00854797	32.502	5	7.3	5	5	0.9972	-0.00121773	12.777	5	7.3	5	5	1.2025	0.0800851	7.1811	5
	913	Tb927.11.2880	Tb927.11.2880	KIN-A	kinesin, putative (KIN-A)	96.059	3.2	0	4.097	1		2.09513	0.321211	0.186727	0.728792		3.2	2	2	1.28148	0.107711	16.413	2	0	0	0				0	1.4	1	1	3.4254	0.534711	NaN	1
	1263	Tb927.3.3610	Tb927.3.3610	PEX7	peroxisomal targeting signal type 2 receptor, putative,peroxin 7 (PEX7)	39.734	4.4	0	3.5401	1		1.08887	0.0369747	0.187142	0.727829		4.4	1	1	0.962742	-0.0164901	NaN	1	4.4	1	1	1.2474	0.0960057	NaN	1	4.4	1	1	1.075	0.0314085	NaN	1
	1643	Tb927.6.5070;REV__Tb927.11.2160	Tb927.6.5070;REV__Tb927.11.2160		hypothetical protein, conserved ;hypothetical protein, conserved	51.821	3.5	0	4.2022	2		1.68603	0.226865	0.187535	0.726917		3.5	2	2	4.22279	0.6256	186.79	2	2	1	1	0.98251	-0.00766302	NaN	1	2	1	1	1.1552	0.0626572	NaN	1
	1768	Tb927.7.5340	Tb927.7.5340		hypothetical protein, conserved	56.822	8.8	0	15.714	1		0.841628	-0.0748799	0.187563	0.726853		7.2	3	3	1.03272	0.0139811	107.46	3	8.8	4	4	0.92381	-0.0344173	134.23	3	4.8	2	2	0.62488	-0.204203	147.54	3
	2193	Tb927.9.7720	Tb927.9.7720		predicted tetratricopeptide repeat protein	152.89	1.2	0.005655	2.2937	1		1.07287	0.0305451	0.187717	0.726497		1.2	1	1	0.998403	-0.000694316	NaN	1	1.2	1	1	1.2143	0.084326	NaN	1	1.2	1	1	1.0186	0.00800367	NaN	1
	130	Tb927.10.5990;Tb11.v5.0193	Tb927.10.5990;Tb11.v5.0193		hypothetical protein, conserved ;hypothetical protein, conserved	50.768	2.5	0.0010065	2.982	2		1.53786	0.186916	0.187736	0.726453		2.5	1	1	1.06174	0.0260183	0.79099	2	2.5	1	1	1.0406	0.0172838	NaN	1	2.5	1	1	3.2919	0.517447	NaN	1
	2106	Tb927.9.15470	Tb927.9.15470		kinesin, putative	74.614	1.5	0.003413	2.6457	1		1.23941	0.093214	0.188	0.725843		1.5	1	1	0.907194	-0.0422998	NaN	1	1.5	1	1	1.2004	0.079326	NaN	1	1.5	1	1	1.7483	0.242616	NaN	1
	2123	Tb927.9.2910	Tb927.9.2910		hypothetical protein, conserved	19.339	8.3	0	4.185	1		0.863016	-0.063981	0.188093	0.725626		8.3	1	1	0.7818	-0.106904	NaN	1	0	0	0				0	8.3	1	1	0.95267	-0.0210575	NaN	1
	664	Tb927.10.9780	Tb927.10.9780		ATP-dependent DEAD/H RNA helicase, putative,ATP- dependent RNA helicase, putative	97.494	3.5	0	245.29	1		1.11865	0.048695	0.188318	0.725108		3.5	2	2	0.949487	-0.0225109	23.302	5	3.5	2	2	1.1014	0.0419451	12.262	2	3.5	2	2	1.3386	0.126651	33.705	2
	1674	Tb927.7.1730;Tb927.7.1750;Tb927.7.1740	Tb927.7.1730;Tb927.7.1750;Tb927.7.1740		60S ribosomal protein L7, putative ;60S ribosomal protein L7, putative ;60S ribosomal protein L7, putative	27.713	57.9	0	125.23	3		1.07961	0.0332667	0.188444	0.724818		52.1	18	18	0.945448	-0.0243625	10.698	28	55.4	19	19	1.1837	0.0732416	9.4268	32	57.4	18	18	1.1244	0.0509208	37.56	33
	2070	Tb927.9.13380	Tb927.9.13380		phosphoinositide-binding protein, putative	48.172	6.4	0	9.3966	1		1.03586	0.0152998	0.188732	0.724154		6.4	2	2	0.993345	-0.00290007	NaN	1	1.9	1	1	1.016	0.00689371	NaN	1	1.9	1	1	1.1013	0.0419056	NaN	1
	1178	Tb927.2.5130	Tb927.2.5130		hypothetical protein, conserved	43.557	31.5	0	236.4	1		1.05828	0.0245999	0.188877	0.723821		27.2	9	9	0.971817	-0.0124154	8.205	6	29.5	10	10	1.157	0.0633334	7.6219	8	25.9	9	9	1.0541	0.0228818	9.1579	8
	261	Tb927.1.3270	Tb927.1.3270		hypothetical protein, conserved	98.508	8.1	0	10.185	1		1.09218	0.0382946	0.189393	0.722636		5.4	3	3	1.03165	0.0135328	18.964	3	3.6	3	3	0.98977	-0.00446571	8.8425	3	4.6	3	3	1.2759	0.105817	14.389	3
	1592	Tb927.6.3160	Tb927.6.3160		splicing factor 3a, putative	61.529	3.1	0	4.3427	1		1.07154	0.0300067	0.189472	0.722456		3.1	1	1	1.06361	0.0267844	NaN	1	3.1	1	1	1.1965	0.0779127	NaN	1	3.1	1	1	0.96677	-0.0146768	NaN	1
	1823	Tb927.7.910	Tb927.7.910		hypothetical protein, conserved	80.436	4.6	0	3.8187	1	1	1.23505	0.0916857	0.189777	0.721755		2.8	1	1	0.849907	-0.0706288	NaN	1	1.8	1	1	1.5578	0.192512	NaN	1	2.8	1	1	1.4229	0.153174	NaN	1
	1310	Tb927.3.5650	Tb927.3.5650		protein kinase, putative,serine/threonine protein kinase, putative	103.57	1.5	0	28.879	1		1.07788	0.0325693	0.190231	0.720719		1.5	1	1	1.22633	0.088608	NaN	1	1.5	1	1	1.0439	0.0186589	14.612	2	1.5	1	1	0.97823	-0.00955902	NaN	1
	522	Tb927.10.3990	Tb927.10.3990	DHH1	DHH1 (DHH1)	46.468	84.7	0	323.31	1		1.06798	0.0285649	0.190527	0.720044		84	32	32	0.949307	-0.0225933	14.185	51	84.7	33	33	1.1254	0.0513069	36.563	52	83.5	32	32	1.1402	0.056981	26.708	78
	944	Tb927.11.3750	Tb927.11.3750	B5R	NADH-cytochrome b5 reductase, putative (B5R)	34.091	4.9	0.0038591	2.4997	1		1.14451	0.0586193	0.191272	0.718349		4.9	1	1	0.922935	-0.0348289	NaN	1	4.9	1	1	1.1554	0.0627324	NaN	1	4.9	1	1	1.4059	0.147954	NaN	1
	1245	Tb927.3.3110	Tb927.3.3110		hypothetical protein, conserved	118.8	1.1	0	8.7802	1		1.04814	0.020419	0.191687	0.717408		1.1	1	1	0.988045	-0.00522342	NaN	1	1.1	1	1	1.024	0.0103	NaN	1	1.1	1	1	1.1381	0.0561804	NaN	1
	1556	Tb927.6.1860	Tb927.6.1860		hypothetical protein, conserved	30.977	12.8	0	23.834	1	1	1.07234	0.0303326	0.192727	0.715056		12.8	3	3	0.981162	-0.00825941	8.4886	3	12.8	3	3	1.0366	0.0156112	10.182	3	12.8	3	3	1.2124	0.0836459	12.508	3
	1817	Tb927.7.7460	Tb927.7.7460		hypothetical protein, conserved	22.358	54.7	0	121.27	1		1.06332	0.0266628	0.193323	0.713716		48.4	9	9	0.950841	-0.0218919	19.507	14	54.7	11	11	1.1243	0.0508822	23.118	17	54.7	11	11	1.1246	0.0509981	17.55	24
	1045	Tb927.11.6720	Tb927.11.6720		hypothetical protein, conserved	117.56	14.1	0	82.207	1		1.06937	0.0291282	0.193608	0.713076		13.1	10	10	0.958681	-0.0183259	14.309	17	11.8	10	10	1.0769	0.0321754	16.539	15	10.8	9	9	1.1845	0.0735351	36.455	15
	2097	Tb927.9.1510	Tb927.9.1510		hypothetical protein, conserved	56.685	3.4	0.0052034	2.3418	1		0.429217	-0.367323	0.193746	0.712766		1.6	1	1	0.888178	-0.0514998	NaN	1	3.4	2	2	0.97026	-0.0131119	NaN	1	3.4	2	2	0.091758	-1.03736	284.54	2
	1040	Tb927.11.6540	Tb927.11.6540		hypothetical protein, conserved	60.154	1.6	0.0069735	2.1534	1		1.06236	0.02627	0.193748	0.712762		0	0	0				0	1.6	1	1	1.0185	0.00796103	28.609	3	1.6	1	1	1.1081	0.044579	32.472	2
	923	Tb927.11.3120	Tb927.11.3120	NOG1	nucleolar GTP-binding protein 1 (NOG1)	74.753	12.2	0	20.592	1		1.10322	0.042664	0.193849	0.712536		12.2	5	5	0.964506	-0.015695	28.807	6	7.2	3	3	1.0645	0.0271457	36.276	6	10.2	4	4	1.3078	0.116541	24.475	6
	1728	Tb927.7.3550	Tb927.7.3550		hypothetical protein, conserved	138.16	3.9	0	15.751	1		1.07823	0.0327133	0.193972	0.712262		2.8	3	3	0.957854	-0.0187005	31.266	5	1	2	2	1.2157	0.0848264	11.643	4	2.1	3	3	1.0765	0.032014	13.175	5
	673	Tb927.10.9910	Tb927.10.9910		hypothetical protein, conserved	48.986	2.4	0.0038722	2.5318	1		1.06006	0.0253321	0.194124	0.711921		2.4	1	1	1.17535	0.0701674	NaN	1	2.4	1	1	1.0304	0.0130059	20.231	3	2.4	1	1	0.98361	-0.00717706	NaN	1
	671	Tb927.10.9890;Tb11.v5.0458	Tb927.10.9890;Tb11.v5.0458		hypothetical protein, conserved ;hypothetical protein, conserved	97.192	10.3	0	158.74	2		1.03702	0.0157887	0.194349	0.711418		8	5	5	0.97229	-0.0122043	15.214	6	9.1	5	5	1.0865	0.0360297	26.455	6	10.3	7	7	1.0557	0.0235405	14.602	8
	1429	Tb927.5.1090	Tb927.5.1090		threonyl-tRNA synthetase, putative	90.983	18.3	0	230.64	1	1	1.18629	0.0741921	0.194919	0.710146		14.6	9	9	0.877963	-0.0565237	11.507	13	18.3	12	12	1.4887	0.172807	29.807	11	17	11	11	1.2773	0.106293	29.296	16
	1703	Tb927.7.2720	Tb927.7.2720		hypothetical protein, conserved	74.108	2.1	0	4.3846	1		0.869998	-0.0604818	0.195121	0.709695		2.1	1	1	0.678104	-0.168704	19.767	2	2.1	1	1	1.0368	0.015695	NaN	1	2.1	1	1	0.93662	-0.0284366	NaN	1
	1579	Tb927.6.2550	Tb927.6.2550	TRRM2	RNA-binding protein, putative (TRRM2)	79.849	24.6	0	86.462	1		1.05258	0.0222536	0.195168	0.709591		24.6	17	17	1.02995	0.0128166	36.065	31	20.3	14	14	0.98286	-0.00750834	21.273	28	19.2	13	13	1.152	0.0614525	22.714	21
	617	Tb927.10.7910	Tb927.10.7910		hypothetical protein, conserved	21.451	19	0	11.093	1	1	1.05507	0.0232826	0.19525	0.709409		14.3	4	4	0.962464	-0.0166155	23.56	5	15.3	4	4	1.0709	0.0297489	27.591	6	15.3	4	4	1.1395	0.0567143	5.8194	7
	839	Tb927.11.15990	Tb927.11.15990	TbNup109	nucleoporin Nup109 (TbNup109)	108.72	1.1	0	4.242	1		1.09705	0.0402283	0.195379	0.709122		1.1	1	1	1.29976	0.113865	NaN	1	1.1	1	1	0.99231	-0.00335263	NaN	1	1.1	1	1	1.0237	0.0101727	NaN	1
	227	Tb927.11.3600;Tb927.11.3590;Tb11.v5.1059	Tb927.11.3600;Tb927.11.3590;Tb11.v5.1059		40S ribosomal protein S4, putative ;40S ribosomal protein S4, putative ;40S ribosomal protein S4, putative	30.644	61.2	0	78.242	3		1.07897	0.0330098	0.195449	0.708966		58.6	20	20	0.938527	-0.0275535	24.616	53	61.2	21	21	1.1689	0.0677774	23.747	66	57.1	20	20	1.145	0.0588055	18.976	69
	1598	Tb927.6.3490	Tb927.6.3490	ZFP1	zinc finger protein (ZFP1)	11.456	10.8	0	8.6713	1		1.05781	0.0244079	0.195757	0.708282		10.8	1	1	1.16609	0.0667304	25.203	2	10.8	1	1	0.97715	-0.0100388	NaN	1	10.8	1	1	1.0388	0.0165319	NaN	1
	1004	Tb927.11.550	Tb927.11.550		hypothetical protein SCD6.10	31.292	62.9	0	323.31	1		1.06431	0.0270679	0.19578	0.708232		62.9	22	22	0.950209	-0.0221808	13.465	122	62.9	23	23	1.145	0.0588055	25.23	124	62.9	22	22	1.1081	0.044579	16.368	134
	649	Tb927.10.9080	Tb927.10.9080		pteridine transporter, putative	69.998	4.5	0	9.4667	1	1	1.19068	0.0757939	0.196203	0.707293		3	2	2	0.879275	-0.055875	58.553	3	4.5	4	4	1.5245	0.183127	22.661	5	4.5	4	4	1.2593	0.100129	26.841	5
	111	Tb927.6.4980;Tb11.0390;Tb11.0290	Tb927.6.4980;Tb11.0390;Tb11.0290	RPS14	40S ribosomal protein S14 (RPS14) ;40S ribosomal protein S14, putative,chrXI additional, unordered contigs (RPS14) ;40S ribosomal protein S14, putative,chrXI additional, unordered contigs (RPS14)	15.513	47.9	0	103.52	3		1.06408	0.0269743	0.196362	0.706942		47.9	9	9	0.948587	-0.022923	18.235	31	47.9	9	9	1.1293	0.0528093	47.19	31	47.9	9	9	1.1247	0.0510367	49.892	29
	971	Tb927.11.4540	Tb927.11.4540	TbNup48	nucleoporin 48 (TbNup48)	48.494	13.2	0	30.404	1		1.06884	0.0289139	0.196426	0.7068		2.6	1	1	1.13653	0.0555815	NaN	1	13.2	4	4	0.94493	-0.0246004	11.302	3	13.2	4	4	1.137	0.0557605	30.308	3
	702	Tb927.11.1080	Tb927.11.1080		hypothetical protein, conserved	60.381	27.2	0	70.999	1		1.06242	0.0262958	0.196455	0.706736		21.8	13	13	0.957396	-0.0189084	13.881	24	23.3	12	12	1.0796	0.0332629	21.283	26	24.6	13	13	1.1602	0.0645329	19.846	29
	1747	Tb927.7.4060;Tb927.7.4070	Tb927.7.4060;Tb927.7.4070		calpain-like cysteine peptidase, putative,cysteine peptidase, Clan CA, family C2, putative ;calpain-like cysteine peptidase, putative,cysteine peptidase, Clan CA, family C2, putative	12.873	16.5	0	78.153	2		0.882507	-0.0542818	0.196774	0.706032		16.5	1	1	1.03228	0.0137973	11.246	2	16.5	1	1	0.70385	-0.15252	NaN	1	16.5	1	1	0.94597	-0.0241226	17.945	2
	934	Tb927.11.3380	Tb927.11.3380		Ran-binding protein 1, putative	17.703	17.2	0	6.7466	1		1.18928	0.0752836	0.197287	0.704902		17.2	3	3	0.876962	-0.0570191	10.641	3	17.2	3	3	1.2644	0.101884	7.973	3	10.8	2	2	1.517	0.180986	48.5	2
	1380	Tb927.5.1610;Tb927.4.3550	Tb927.5.1610;Tb927.4.3550		60S ribosomal protein L13a, putative ;60S ribosomal protein L13a, putative	25.711	42.3	0	82.275	2		1.08	0.0334248	0.197625	0.704158		41	10	10	0.935979	-0.0287339	15.436	22	39.6	10	10	1.1523	0.0615656	28.62	23	39.6	10	10	1.168	0.0674428	14.457	21
	325	Tb927.10.1170;Tb11.0560;Tb11.v5.0858	Tb927.10.1170;Tb11.0560	IFT172	intraflagellar transport protein IFT172, putative (IFT172) ;chrX additional, unordered contigs,hypothetical protein, conserved	196.6	21.1	0	244.78	3		1.06732	0.028296	0.198129	0.703053		15.9	23	23	0.94509	-0.0245267	12.808	22	17.6	24	24	1.1371	0.0557987	11.217	23	17.3	25	25	1.1314	0.0536162	11.49	21
	162	Tb927.1.1370;Tb11.v5.0391	Tb927.1.1370;Tb11.v5.0391		rRNA biogenesis protein, putative ;rRNA biogenesis protein, putative	75.103	4	0	23.975	2		1.04048	0.0172333	0.198225	0.702841		4	3	3	0.968992	-0.0136797	13.201	3	4	3	3	1.0977	0.0404837	10.447	3	4	3	3	1.059	0.024896	6.2735	3
	924	Tb927.11.3190	Tb927.11.3190		hypothetical protein, conserved	184.71	33.5	0	323.31	1		1.07446	0.0311885	0.198655	0.7019		31.5	51	51	0.940557	-0.026615	18.507	83	30.7	49	49	1.1295	0.0528862	13.952	80	30.1	47	47	1.1676	0.0672941	22.226	74
	166	Tb11.v5.0399;Tb927.10.9650	Tb11.v5.0399;Tb927.10.9650		hypothetical protein, conserved ;hypothetical protein, conserved	121.09	7.5	0	53.901	2		1.04984	0.021124	0.199677	0.699672		5.9	5	5	1.1492	0.0603959	25.8	7	5.8	5	5	0.99102	-0.00391758	16.483	7	5	4	4	1.016	0.00689371	14.879	7
	521	Tb927.11.14130;Tb927.10.3840	Tb927.11.14130;Tb927.10.3840		ribosomal protein L18, putative ;60S ribosomal protein L18a, putative	20.904	61.5	0	130.85	2		1.08226	0.0343314	0.199743	0.699528		60.3	13	13	0.932749	-0.0302353	19.167	35	60.3	13	13	1.1582	0.0637836	21.242	47	61.5	15	15	1.1734	0.0694461	26.888	50
	1518	Tb927.5.4310	Tb927.5.4310		GTP-binding protein, putative	91.346	12.2	0	24.203	1		1.10268	0.042449	0.200221	0.69849		8.5	6	6	0.917095	-0.0375858	11.984	9	9	6	6	1.1995	0.0790003	59.291	7	7.5	5	5	1.2188	0.0859324	21.3	5
	1189	Tb927.2.5810	Tb927.2.5810		hypothetical protein, conserved	174.02	4.9	0	25.979	1		1.19744	0.0782542	0.200941	0.696932		3.2	4	4	1.04869	0.0206474	65.112	4	4.9	6	6	0.97438	-0.0112716	14.8	5	2.1	2	2	1.6803	0.225387	NaN	1
	1804	Tb927.7.6930	Tb927.7.6930		ATPase, putative	55.82	8.8	0	6.648	1	1	1.07208	0.030227	0.201096	0.696598		6.7	3	3	0.941088	-0.0263698	33.214	5	8.8	4	4	1.1652	0.0664005	67.214	3	6.7	3	3	1.1237	0.0506504	20.839	3
	2213	Tb927.9.9060	Tb927.9.9060		Lsm12 protein, putative	21.06	51.1	0	115.56	1		1.05074	0.0214957	0.201111	0.696564		51.1	10	10	0.956663	-0.019241	16.074	21	45.8	9	9	1.0977	0.0404837	9.8755	15	45.8	9	9	1.1047	0.0432444	31.648	18
	191	Tb927.10.14800;Tb11.v5.0626	Tb927.10.14800;Tb11.v5.0626		protein kinase, putative,mitogen-activated protein kinase 9, putative ;protein kinase, putative	42.749	4.4	0	71.254	2		1.04927	0.0208857	0.201603	0.695503		4.4	1	1	1.10768	0.0444133	NaN	1	4.4	1	1	1.0885	0.0368284	NaN	1	4.4	1	1	0.95811	-0.0185846	NaN	1
	1170	Tb927.2.470;Tb927.4.220;Tb11.v5.0495;Tb927.2.480;Tb11.v5.0800;Tb927.6.5170	Tb927.2.470		retrotransposon hot spot protein 4 (RHS4), putative	98.316	36.7	0	54.105	6		1.06582	0.0276819	0.201627	0.69545		30.6	26	2	0.956663	-0.019241	9.9594	6	34.5	28	2	1.1798	0.0718084	13.621	4	34.9	28	2	1.0727	0.0304783	11.073	4
	626	Tb927.10.8090	Tb927.10.8090		hypothetical protein, conserved	17.195	14.1	0	5.9863	1	1	1.11076	0.0456203	0.20213	0.694368		14.1	2	2	1.09162	0.0380713	38.168	4	14.1	3	3	0.94265	-0.0256495	12.698	4	14.1	2	2	1.3318	0.124439	11.816	3
	1036	Tb927.11.6440	Tb927.11.6440		hypothetical protein, conserved	48.841	34.5	0	146.64	1		1.06429	0.0270582	0.20249	0.693597		33.3	19	19	1.08344	0.034803	17.564	87	34.5	19	19	0.95264	-0.0210712	24.554	96	33.3	18	18	1.168	0.0674428	21.068	97
	1801	Tb927.7.6760	Tb927.7.6760		hypothetical protein, conserved	132.3	1.1	0.0061119	2.2536	1		1.04046	0.0172273	0.20255	0.693468		0.6	1	1	1.07552	0.0316198	14.858	3	1.1	2	2	0.9647	-0.0156077	9.1289	4	1.1	2	2	1.0856	0.0356698	12.4	4
	1453	Tb927.5.1880	Tb927.5.1880		inhibitor of serine peptidase (ISP), putative,ecotin family (I11), putative	17.81	18.8	0	6.1973	1		1.08271	0.0345134	0.203185	0.692108		18.8	2	2	1.02228	0.0095679	NaN	1	18.8	2	2	0.98608	-0.00608785	28.406	3	18.8	2	2	1.2591	0.10006	16.074	4
	302	Tb927.10.1070;Tb927.7.7360	Tb927.10.1070	CRK1	cell division protein kinase 2 homolog 1,cdc2- like protein kinase (CRK1)	34.35	25.6	0	29.394	2		1.08212	0.0342771	0.203423	0.6916		25.6	8	8	1.14419	0.0584985	18.282	7	25.6	8	8	0.93151	-0.0308125	12.335	7	21.9	7	7	1.1889	0.0751453	7.5775	9
	2178	Tb927.9.6870	Tb927.9.6870	RBSR1	RNA-binding protein, putative (RBSR1)	17.565	18.2	0	17.151	1		1.09665	0.0400669	0.203461	0.69152		18.2	2	2	0.93668	-0.0284086	47.711	3	18.2	2	2	1.2725	0.104658	10.482	3	18.2	2	2	1.1065	0.0439514	3.7454	3
	1841	Tb927.8.1500	Tb927.8.1500		hypothetical protein, conserved	63.206	4.5	0	15.359	1		1.0586	0.0247329	0.203599	0.691225		4.5	2	2	0.948947	-0.0227582	9.0144	4	4.5	2	2	1.1217	0.0498767	10.781	3	4.5	2	2	1.1145	0.0470801	15.212	4
	931	Tb927.11.330	Tb927.11.330	TbMlp-1	Nucleoporin (TbMlp-1)	109.76	9.1	0	27.601	1		1.02893	0.012387	0.203656	0.691104		6.2	5	5	1.03282	0.014026	12.832	6	9.1	8	8	0.97949	-0.00899999	17.444	10	7.9	7	7	1.0768	0.032135	25.654	9
	957	Tb927.11.4190	Tb927.11.4190		hypothetical protein, conserved	59.057	9.3	0	32.535	1		1.08212	0.0342734	0.20376	0.69088		9.3	3	3	0.960154	-0.0176593	29.168	3	9.3	3	3	1.0595	0.025101	37.29	3	6.1	2	2	1.2456	0.0953786	18.567	2
	1978	Tb927.8.6440	Tb927.8.6440	RPB20	RNA-binding protein, putative (RPB20)	20.37	33.7	0	20.073	1		1.04691	0.0199076	0.203861	0.690665		33.7	5	5	0.980681	-0.00847242	11.862	7	33.7	5	5	1.0276	0.0118241	7.9278	7	11.4	3	3	1.1386	0.0563712	12.248	5
	408	Tb927.10.14700	Tb927.10.14700		hypothetical protein, conserved	37.7	16.4	0	16.509	1		1.05225	0.0221197	0.203887	0.690611		16.4	5	5	0.965531	-0.015234	9.1754	12	13.2	4	4	1.0547	0.0231289	12.328	11	13.2	4	4	1.1441	0.058464	20.184	12
	1904	Tb927.8.3530	Tb927.8.3530		glycerol-3-phosphate dehydrogenase [NAD ], glycosomal	37.805	48.9	0	216.3	1		1.04506	0.019141	0.203992	0.690387		47.2	13	13	0.960246	-0.0176176	17.62	45	46.9	14	14	1.0846	0.0352696	15.685	52	46.9	14	14	1.0959	0.0397709	12.836	43
	853	Tb927.11.1650	Tb927.11.1650		hypothetical protein, conserved	16.067	5.9	0	3.6376	1	1	1.51043	0.179101	0.204253	0.689831		5.9	1	1				0	5.9	1	1	1.1099	0.0452839	NaN	1	5.9	1	1	2.0555	0.312917	62.235	2
	1286	Tb927.3.4820	Tb927.3.4820		acyltransferase, putative	34.629	11.1	0	54.397	1		1.04576	0.0194302	0.204924	0.688407		8.2	2	2	0.98561	-0.00629486	9.9415	2	11.1	3	3	1.0199	0.00855759	10.146	3	11.1	3	3	1.1377	0.0560278	4.6969	5
	852	Tb927.11.16490	Tb927.11.16490		hypothetical protein, conserved	44.083	40.8	0	40.693	1		1.00839	0.00362992	0.205496	0.687196		40.8	8	8	1.00769	0.00332637	19.878	7	34	7	7	1.023	0.00987563	25.078	6	34	7	7	0.99469	-0.00231225	22.229	10
	1765	Tb927.7.5230	Tb927.7.5230		lanosterol synthase	103.03	11	0	39.602	1		1.0571	0.0241156	0.205827	0.686497		8.1	6	6	1.09167	0.0380903	15.173	8	9.5	8	8	0.95144	-0.0216186	21.936	8	8.9	7	7	1.1373	0.055875	19.788	11
	1645	Tb927.6.5110	Tb927.6.5110		damage-specific DNA binding protein, putative	138.21	26.6	0	323.31	1		1.06872	0.028865	0.205944	0.686252		25.2	25	25	0.945716	-0.0242393	28.175	41	24.3	25	25	1.0956	0.039652	12.793	39	24.9	26	26	1.1781	0.0711822	23.261	44
	177	Tb927.10.660;Tb11.v5.0500	Tb927.10.660;Tb11.v5.0500		2-oxoisovalerate dehydrogenase alpha subunit, putative ;2-oxoisovalerate dehydrogenase alpha subunit, putative	46.369	14.2	0	60.407	2	1	1.04991	0.0211504	0.20599	0.686155		11.8	3	3	0.983574	-0.00719282	23.489	3	14.2	4	4	1.0221	0.00949339	4.4314	4	14.2	4	4	1.1512	0.0611508	24.824	4
	396	Tb927.10.1430	Tb927.10.1430		hypothetical protein, conserved	27.339	14.7	0	28.563	1		1.11698	0.048045	0.207319	0.683361		14.7	3	3	0.906618	-0.0425755	2.2736	3	9.8	2	2	1.1786	0.0713664	0.69132	2	14.7	3	3	1.3042	0.115344	6.4871	3
	1060	Tb927.11.740	Tb927.11.740	eIF-5A	eukaryotic translation initiation factor 5a, putative (eIF-5A)	17.82	15.1	0	29.58	1		1.06084	0.0256497	0.2077	0.682565		7.8	1	1	0.945626	-0.0242804	2.5149	2	15.1	2	2	1.1381	0.0561804	19.092	2	15.1	2	2	1.1093	0.045049	10.188	2
	2031	Tb927.9.11050	Tb927.9.11050		4E-interacting protein, putative	58.54	4.8	0	19.639	1		1.16414	0.0660044	0.208696	0.680486		4.8	2	2	0.869868	-0.0605468	17.156	4	4.8	2	2	1.2668	0.102708	14.993	4	1.8	1	1	1.4317	0.155852	NaN	1
	1627	Tb927.6.4440	Tb927.6.4440		hypothetical protein, conserved	37.718	50	0	261.06	1		1.06182	0.0260499	0.208728	0.680419		50	14	14	1.07027	0.0294951	17.163	59	50	14	14	0.9548	-0.0200876	12.875	52	42.9	12	12	1.1715	0.0687423	18.06	54
	472	Tb927.10.6370;Tb927.10.220	Tb927.10.6370;Tb927.10.220		60S ribosomal proteins L37, putative ;60S ribosomal protein L37a, putative	10.458	47.3	0	61.009	2		1.06583	0.0276878	0.208753	0.680368		47.3	5	5	0.940911	-0.0264515	9.2996	14	47.3	5	5	1.1512	0.0611508	11.705	17	47.3	5	5	1.1178	0.0483641	17.066	17
	2098	Tb927.9.15150;Tb927.9.15110	Tb927.9.15150;Tb927.9.15110		unspecified product ;unspecified product	34.636	38	0	84.024	2		1.05329	0.0225487	0.209557	0.678698		35.1	10	10	0.953743	-0.0205684	61.693	14	35.1	10	10	1.0813	0.0339462	52.412	16	38	11	11	1.1331	0.0542682	35.226	19
	2064	Tb927.9.12890	Tb927.9.12890		hypothetical protein, conserved	16.341	7.9	0	5.8904	1		0.912877	-0.0395878	0.209694	0.678414		7.9	1	1	1.03645	0.0155492	26.097	2	7.9	1	1	0.76638	-0.115556	NaN	1	7.9	1	1	0.95773	-0.0187569	20.374	2
	959	Tb927.11.4200	Tb927.11.4200		lectin, putative,mannose-specific lectin, putative	62.272	3.9	0	3.8148	1		1.10232	0.0423078	0.209772	0.678253		3.9	2	2	0.963855	-0.0159881	NaN	1	3.9	2	2	1.0451	0.0191578	24.226	2	3.9	2	2	1.3297	0.123754	28.807	4
	1979	Tb927.8.650	Tb927.8.650		cation-transporting ATPase, putative	140.4	2.4	0	5.374	1		1.13695	0.0557406	0.209896	0.677995		0.6	1	1	1.03855	0.0164278	NaN	1	0.6	1	1	0.96787	-0.014183	NaN	1	2.4	3	3	1.4621	0.164977	31.778	2
	283	Tb927.1.640	Tb927.1.640		BRCA2	176.31	25.7	0	229.31	1		1.05808	0.0245167	0.210916	0.675891		24.7	23	23	1.01088	0.00469833	22.25	39	25.2	22	22	0.99011	-0.00431655	16.653	39	24.2	22	22	1.1835	0.0731683	15.24	38
	380	Tb927.10.13730	Tb927.10.13730		60S ribosomal protein L7, putative	34.502	25.5	0	32.409	1		1.03663	0.0156234	0.211258	0.675186		14.1	4	4	1.04656	0.0197648	6.7895	4	18.1	4	4	0.96993	-0.0132596	12.288	4	25.5	6	6	1.0974	0.040365	11.917	5
	1034	Tb927.11.6420	Tb927.11.6420		hypothetical protein, conserved	144.87	4.5	0	15.045	1		0.927626	-0.0326271	0.211533	0.674622		2.4	2	2	0.888573	-0.0513069	16.33	3	3.2	3	3	0.83657	-0.0774977	11.311	4	4.5	4	4	1.0738	0.0309234	16.522	4
	1535	Tb927.5.930;Tb11.v5.0613;Tb927.10.3650;Tb927.11.6730	Tb927.5.930;Tb11.v5.0613	FRDg	NADH-dependent fumarate reductase (FRDg) ;NADH-dependent fumarate reductase, putative	123.69	37.4	0	323.31	4		1.05046	0.0213799	0.211546	0.674595		35.5	32	13	0.952018	-0.0213547	15.891	23	37.4	37	15	1.109	0.0449315	21.407	26	37.3	36	14	1.0979	0.0405628	13.791	24
	1954	Tb927.8.5660	Tb927.8.5660		hypothetical protein, conserved	24.492	21.1	0	9.1457	1	1	1.16166	0.0650808	0.212142	0.673373		21.1	4	4	0.899442	-0.0460267	29.057	3	17	3	3	1.1508	0.0609999	6.2796	3	17	3	3	1.5145	0.180269	9.0373	3
	895	Tb927.11.2360	Tb927.11.2360		phenylalanyl-tRNA synthetase (beta subunit), putative	70.311	1.4	0.0069897	2.1698	1	1	1.0789	0.0329797	0.212926	0.671772		1.4	1	1	0.991572	-0.0036759	NaN	1	1.4	1	1	1.2571	0.0993698	NaN	1	1.4	1	1	1.0075	0.00324505	8.8968	2
	662	Tb927.10.9700;Tb11.v5.0773	Tb927.10.9700;Tb11.v5.0773		predicted C2 domain protein ;hypothetical protein, conserved	132.58	5.7	0	11.495	2		1.08755	0.0364512	0.213059	0.6715		3.9	4	4	0.956663	-0.019241	16.612	4	3.8	4	4	1.0536	0.0226758	9.6314	7	4.5	5	5	1.2762	0.105919	8.6787	7
	257	Tb927.1.3040	Tb927.1.3040		hypothetical protein, conserved	29.227	10	0	3.537	1	1	1.16758	0.0672851	0.213192	0.671229		5.2	1	1	1.18152	0.0724397	NaN	1	10	2	2	1.5216	0.1823	24.491	4	4.8	1	1	0.88535	-0.052885	NaN	1
	2229	Tb927.9.9940	Tb927.9.9940		PACRGB	35.353	7.4	0	3.7572	1		1.07997	0.0334103	0.213283	0.671043		3.2	1	1	0.975324	-0.010851	NaN	1	7.4	2	2	1.0266	0.0114013	11.869	2	7.4	2	2	1.258	0.0996806	NaN	1
	401	Tb927.10.14470	Tb927.10.14470	IFT140	intraflagellar transport protein IFT140, putative (IFT140)	186.61	1.9	0	5.1199	1		1.23509	0.0917003	0.213415	0.670776		1.2	2	2	1.88882	0.276191	88.913	2	1.9	3	3	1.036	0.0153598	2.4163	2	1.2	2	2	0.96283	-0.0164504	3.3944	2
	2027	Tb927.9.10680	Tb927.9.10680		hypothetical protein, conserved	16.869	7.7	0	9.3151	1		0.838606	-0.0764418	0.213612	0.670374		7.7	1	1	0.779545	-0.108159	NaN	1	7.7	1	1	0.6431	-0.191721	NaN	1	7.7	1	1	1.1764	0.070555	NaN	1
	1421	Tb927.4.760	Tb927.4.760		gamma-adaptin 1, putative,AP-1 adapter complex gamma subunit, putative	87.344	4.7	0	78.794	1		0.939093	-0.0272912	0.213901	0.669787		4.7	2	2	1.06595	0.027737	5.6525	2	4.7	2	2	0.87156	-0.0597027	27.156	2	4.7	2	2	0.89144	-0.0499079	16.155	2
	812	Tb927.11.14950	Tb927.11.14950	ZFP2	zinc finger protein 2 (ZFP2)	15.767	36	0	10.007	1		0.969019	-0.0136679	0.214122	0.669339		30.2	3	3	0.9243	-0.0341871	5.2092	3	36	4	4	1.0298	0.0127529	15.817	4	34.5	3	3	0.95594	-0.0195694	8.8901	3
	1085	Tb927.11.880	Tb927.11.880	CYPA	cyclophilin a,cyclophilin type peptidyl-prolyl cis-trans isomerase (CYPA)	18.717	6.8	0	12.68	1		0.725741	-0.139218	0.214164	0.669254		6.8	1	1	0.988045	-0.00522342	NaN	1	6.8	1	1	1.0215	0.00923837	NaN	1	6.8	1	1	0.37873	-0.42167	102.43	2
	2139	Tb927.9.4210;Tb11.v5.0561	Tb927.9.4210;Tb11.v5.0561	ACS3	fatty acyl CoA synthetase 3 (ACS3) ;fatty acyl CoA synthetase, putative	77.853	42	0	309.9	2		1.03556	0.0151773	0.214298	0.668981		38.7	23	3	1.09955	0.0412164	11.105	2	34.2	19	2	0.97245	-0.0121327	3.0555	2	37.9	23	2	1.0386	0.0164483	2.5275	3
	875	Tb927.11.1910	Tb927.11.1910		cation transporter protein, putative	34.737	5.3	0	26.476	1		1.22242	0.0872211	0.21477	0.668025		5.3	1	1	0.894454	-0.0484418	NaN	1	5.3	1	1	1.796	0.254306	NaN	1	5.3	1	1	1.1371	0.0557987	NaN	1
	1764	Tb927.7.5180;Tb927.7.5170	Tb927.7.5180;Tb927.7.5170		60S ribosomal protein L23a, putative ;60S ribosomal protein L23a,60S ribosomal protein L25	18.17	59.8	0	165.19	2		1.05408	0.0228744	0.215594	0.666364		59.8	12	12	0.947777	-0.0232936	11.247	21	54.9	12	12	1.1284	0.0524631	12.033	29	54.9	12	12	1.0951	0.0394538	14.182	28
	567	Tb927.10.5870	Tb927.10.5870		hypothetical protein, conserved	49.467	4.8	0	5.3957	1		1.21558	0.0847845	0.215779	0.66599		4.8	2	2	0.853534	-0.0687794	31.947	4	4.8	2	2	1.7044	0.231572	19.918	2	4.8	2	2	1.2347	0.0915614	28.47	3
	968	Tb927.11.4460	Tb927.11.4460	ALBA1	ALBA-Domain Protein (ALBA1)	14.038	39.2	0	116.4	1		1.08207	0.0342553	0.216544	0.664454		39.2	5	5	0.921744	-0.0353897	3.9886	9	39.2	6	6	1.1966	0.077949	7.6921	10	39.2	6	6	1.1487	0.0602066	16.41	11
	88	Tb927.5.4550;Tb927.5.4540;Tb05.5K5.190;Tb05.5K5.180;Tb11.v5.0380;Tb11.v5.0379;Tb927.7.7470	Tb927.5.4550;Tb927.5.4540;Tb05.5K5.190;Tb05.5K5.180;Tb11.v5.0380		receptor-type adenylate cyclase GRESAG 4, putative,adenylyl cyclase, putative,ATP pyrophosphate-lyase, putative ;receptor-type adenylate cyclase GRESAG 4, putative,adenylyl cyclase, putative,ATP pyrophosphate-lyase, putative ;receptor-type adenylate cyclas	136.52	2.4	0	12.41	7		1.20262	0.0801296	0.217064	0.663412		1	1	1	1.06545	0.0275333	NaN	1	2.4	3	3	0.93516	-0.0291141	13.034	3	1	1	1	1.7457	0.24197	NaN	1
	758	Tb927.11.12910	Tb927.11.12910		hypothetical protein, conserved	23.598	11.7	0	3.9406	1		1.08631	0.0359552	0.217164	0.663212		4.7	1	1	0.934143	-0.0295867	NaN	1	11.7	2	2	1.2552	0.0987129	20.767	3	11.7	2	2	1.0933	0.0387393	32.986	2
	1022	Tb927.11.6200;Tb927.11.6180	Tb927.11.6200;Tb927.11.6180		60S ribosomal protein L28, putative ;60S ribosomal protein L28, putative	16.861	31.5	0	60.611	2		1.09488	0.0393682	0.217795	0.661952		31.5	5	5	0.9081	-0.0418662	10.761	25	31.5	5	5	1.2158	0.0848621	13.127	30	31.5	5	5	1.1888	0.0751088	14.182	22
	565	Tb927.10.5830	Tb927.10.5830		hypothetical protein, conserved	59.941	21.1	0	38.882	1	1	1.0606	0.0255514	0.218813	0.659927		18.3	7	7	0.98464	-0.00672269	10.174	14	19.6	8	8	1.0119	0.0051376	24.544	14	19.8	8	8	1.1974	0.0782393	15.308	13
	1635	Tb927.6.4770	Tb927.6.4770		protein mkt1, putative	83.306	26.4	0	122.25	1		1.08108	0.0338561	0.219208	0.659143		25.2	17	17	0.92115	-0.0356698	23.443	40	23.5	16	16	1.1436	0.0582741	15.327	35	24.1	16	16	1.1994	0.078964	20.379	26
	140	Tb927.10.5280;Tb11.v5.0248	Tb927.10.5280;Tb11.v5.0248		pre-mRNA splicing factor ATP-dependent RNA helicase, putative,DEAH-box RNA helicase, putative ;pre-mRNA splicing factor ATP-dependent RNA helicase, putative	98.058	4.7	0	8.7652	2		1.10234	0.0423161	0.219582	0.658403		4.7	3	3	0.951384	-0.021644	21.821	3	3.3	2	2	1.0508	0.0215201	9.2392	2	4.7	3	3	1.3399	0.127072	9.3512	3
	1888	Tb927.8.3060	Tb927.8.3060		cytosolic leucyl aminopeptidase, putative,metallo-peptidase, Clan MF, Family M17	71.314	3.6	0	8.3748	1		1.21456	0.0844183	0.220319	0.656949		3.6	2	2	1.81258	0.258297	52.905	4	3.6	2	2	0.93154	-0.0307985	50.656	5	3.6	2	2	1.0611	0.0257563	60.566	3
	1973	Tb927.8.620	Tb927.8.620	KREPA3	KREPA3,RNA-editing complex protein MP42 (KREPA3)	42.267	2.5	0	4.5268	1	1	1.15111	0.0611176	0.220366	0.656854		2.5	1	1	1.01216	0.00524745	NaN	1	2.5	1	1	0.97545	-0.010795	NaN	1	2.5	1	1	1.5449	0.1889	32.802	2
	1609	Tb927.6.3890	Tb927.6.3890		replication factor C, subunit 2, putative	38.809	5.8	0	6.8494	1		1.12396	0.0507498	0.220632	0.656331		5.8	2	2	0.879507	-0.0557605	8.1031	2	5.8	2	2	1.2652	0.102159	13.616	2	5.8	2	2	1.276	0.105851	1.6363	2
	2054	Tb927.9.12400	Tb927.9.12400		protein kinase, putative	148.15	0.7	0.0038854	2.5541	1		0.8424	-0.0744815	0.220965	0.655676		0.7	1	1	0.601685	-0.220631	NaN	1	0.7	1	1	0.89091	-0.0501662	NaN	1	0.7	1	1	1.1152	0.0473528	NaN	1
	1057	Tb927.11.7350	Tb927.11.7350	H2BVAR	histone H2B variant, putative (H2BVAR)	15.786	29.4	0	6.3292	1		1.06171	0.0260047	0.221502	0.654623		29.4	4	4	0.936067	-0.0286932	17.611	3	11.2	2	2	1.122	0.0499929	13.573	3	18.9	3	3	1.1395	0.0567143	3.3608	3
	1689	Tb927.7.2340;Tb927.7.2370	Tb927.7.2340;Tb927.7.2370		40S ribosomal protein S15, putative ;40S ribosomal protein S15, putative	17.474	61.2	0	173.92	2		1.06471	0.0272332	0.221721	0.654193		60.5	10	10	0.933358	-0.0299516	46.831	28	58.6	10	10	1.1507	0.0609621	20.088	33	61.2	11	11	1.1238	0.050689	12.144	34
	1299	Tb927.3.5400	Tb927.3.5400		hypothetical protein, conserved	64.429	2.6	0	4.6727	1		1.13105	0.05348	0.22236	0.652944		2.6	1	1	0.877347	-0.0568287	9.5376	2	2.6	1	1	1.3519	0.130945	NaN	1	2.6	1	1	1.2199	0.0863242	26.337	2
	562	Tb927.10.5670	Tb927.10.5670	NAT1	N-acetyltransferase subunit Nat1, putative (NAT1)	82.189	29.4	0	68.795	1		1.07968	0.0332932	0.222984	0.651727		26	15	15	0.92285	-0.034869	35.117	16	20.3	13	13	1.2128	0.0837892	35.258	14	27.3	16	16	1.1245	0.0509595	34.898	17
	475	Tb927.10.2290	Tb927.10.2290		chaperone protein DNAj, putative	46.795	32.5	0	30.982	1		1.0559	0.023622	0.223193	0.651319		32.5	9	9	0.94162	-0.0261245	8.8936	11	32.5	9	9	1.1024	0.0423392	9.5532	10	32.5	9	9	1.1341	0.0546514	15.286	13
	1652	Tb927.6.640	Tb927.6.640		kinetoplastid-specific phospho-protein phosphatase, putative	79.106	3.8	0	19.909	1		0.853888	-0.0685991	0.223348	0.651019		3.8	2	2	0.622084	-0.206151	44.615	2	3.8	2	2	0.90711	-0.04234	26.216	3	3.8	2	2	1.1033	0.0426936	14.996	5
	897	Tb927.11.2380	Tb927.11.2380		phosphoglycerate kinase, putative	100.85	6.1	0	9.5514	1		1.0887	0.0369079	0.223376	0.650964		2.7	2	2	1.18654	0.0742806	20.908	2	4.9	4	4	0.90855	-0.0416512	3.4493	3	3.6	3	3	1.197	0.0780942	23.259	5
	551	Tb927.10.5370;Tb927.10.5360	Tb927.10.5370;Tb927.10.5360		40S ribosomal protein S10, putative ;40S ribosomal protein S10, putative	19.285	66.3	0	258.6	2		1.07312	0.0306495	0.223439	0.65084		66.3	19	19	0.923532	-0.0345482	18.275	65	56.4	17	17	1.149	0.06032	13.462	56	66.3	19	19	1.1646	0.0661768	14.08	54
	221	Tb927.4.3800;Tb11.v5.0905	Tb927.4.3800;Tb11.v5.0905		hypothetical protein, conserved ;hypothetical protein, conserved	35.891	8.4	0	6.5271	2	1	1.10168	0.0420546	0.223454	0.650811		8.4	2	2	1.22581	0.0884216	7.1827	2	8.4	2	2	0.89637	-0.0475127	0.84751	2	8.4	2	2	1.2169	0.0852549	13.221	3
	670	Tb927.11.4300;Tb927.10.9880	Tb927.11.4300;Tb927.10.9880	RPL18	60S ribosomal protein L18, putative (RPL18) ;60S ribosomal protein L18, putative (TbL18LP)	21.874	36.3	0	95.825	2		1.07065	0.0296469	0.22355	0.650626		36.3	10	10	0.926269	-0.0332629	19.609	29	36.3	10	10	1.1647	0.0662141	11.635	27	36.3	10	10	1.1376	0.0559896	16.358	25
	234	Tb927.1.1620;Tb11.v5.0529	Tb927.1.1620;Tb11.v5.0529		ATP-dependent DEAD/H RNA helicase, putative ;ATP-dependent DEAD/H RNA helicase, putative	81.817	13.7	0	104.02	2		1.07536	0.0315557	0.22374	0.650256		11.9	7	7	0.937647	-0.0279609	22.025	16	11.9	7	7	1.0816	0.0340667	13.798	17	13.7	8	8	1.2262	0.0885613	25.811	18
	416	Tb927.10.1490;Tb11.v5.0875	Tb927.10.1490		hypothetical protein, conserved	134.81	19.1	0	319.03	2		1.06479	0.027266	0.224502	0.64878		19.1	23	23	0.942863	-0.0255516	31.291	48	18	22	22	1.0767	0.0320947	33.941	51	19.1	23	23	1.1892	0.0752549	26.127	47
	575	Tb927.10.6170	Tb927.10.6170		hypothetical protein, conserved	163.96	1.5	0	6.9556	1	1	1.24849	0.0963837	0.224503	0.648779		1.5	2	2	0.859328	-0.065841	22.59	2	1.5	2	2	1.1666	0.066922	4.7986	2	1.5	2	2	1.9412	0.28807	34.802	2
	845	Tb927.5.1110;Tb927.11.16280	Tb927.5.1110;Tb927.11.16280		60S ribosomal protein L2, putative,60S ribosomal protein L8, putative ;60S ribosomal protein L2, putative,60S ribosomal protein L8, putative	28.314	57.7	0	102.76	2		1.0908	0.0377454	0.224689	0.648419		51.9	12	12	0.905387	-0.0431657	11.727	42	48.8	13	13	1.1937	0.0768952	34.898	42	57.7	16	16	1.2009	0.0795068	36.347	53
	1173	Tb927.2.4870	Tb927.2.4870		kinetoplastid-specific dual specificity phosphatase, putative	32.994	14.2	0	51.423	1		1.06714	0.0282206	0.224847	0.648112		14.2	3	3	0.928333	-0.0322963	6.1391	6	14.2	3	3	1.149	0.06032	19.285	6	7.6	2	2	1.1393	0.0566381	9.3635	4
	1972	Tb927.9.14370;Tb927.8.6180	Tb927.9.14370;Tb927.8.6180		60S ribosomal protein L26, putative ;60S ribosomal protein L26, putative	16.454	45.5	0	34.436	2		1.07386	0.0309478	0.224877	0.648056		37.8	8	8	0.922594	-0.0349892	16.389	27	37.8	8	8	1.1403	0.0570191	27.142	24	45.5	9	9	1.1771	0.0708134	23.997	32
	278	Tb927.1.4810	Tb927.1.4810		hypothetical protein, conserved (pseudogene)	51.247	2.9	0.0073869	2.061	1		0.899558	-0.0459707	0.22492	0.647972		2.9	1	1	1.05156	0.0218332	NaN	1	2.9	1	1	0.72117	-0.141962	NaN	1	2.9	1	1	0.95988	-0.0177831	NaN	1
	1432	Tb927.5.1160	Tb927.5.1160		hypothetical protein, conserved	25.569	9.2	0.0024691	2.7767	1		1.01101	0.00475554	0.225307	0.647225		9.2	2	2	1.00355	0.00154013	8.4181	2	9.2	2	2	1.0346	0.0147725	2.5604	2	9.2	2	2	0.9953	-0.002046	33.17	2
	2044	Tb927.9.11820	Tb927.9.11820		hypothetical protein, conserved	37.33	6.5	0	24.947	1		1.1178	0.0483636	0.225321	0.647198		6.5	2	2	0.880514	-0.0552636	1.7797	2	6.5	2	2	1.2366	0.0922292	0.058654	2	6.5	2	2	1.2827	0.108125	8.0078	2
	1435	Tb927.5.1340;Tb11.v5.0884	Tb927.5.1340		hypothetical protein, conserved	92.191	5.2	0	50.067	2		1.12154	0.0498143	0.226049	0.645798		3	2	2	0.876347	-0.0573237	NaN	1	3	2	2	1.2449	0.0951345	6.3548	2	5.2	3	3	1.2931	0.111632	0.87138	2
	1476	Tb927.5.2780	Tb927.5.2780		mitochondrial DNA polymerase beta	46.102	16	0	15.213	1	1	1.10049	0.0415873	0.226346	0.645227		16	6	6	1.18159	0.0724654	24.409	4	13.3	5	5	0.89742	-0.0470043	19.021	4	7.6	3	3	1.2569	0.0993007	21.061	4
	838	Tb927.11.15970	Tb927.11.15970		hypothetical protein, conserved	117.09	1.1	0	5.3564	1		1.48512	0.171761	0.226689	0.644571		1.1	1	1	1.05555	0.0234804	NaN	1	1.1	1	1	2.0895	0.320042	NaN	1	0	0	0				0
	1201	Tb927.3.1350	Tb927.3.1350		hypothetical protein, conserved	86.927	8.7	0	46.225	1		1.05253	0.0222331	0.227588	0.64285		8.7	5	5	1.07411	0.0310503	15.787	5	8.7	5	5	0.94758	-0.0233841	2.5126	5	8.7	5	5	1.1456	0.059033	20.067	5
	308	Tb927.10.1100;Tb927.6.4690	Tb927.10.1100;Tb927.6.4690		60S ribosomal protein L9, putative ;60S ribosomal protein L9, putative	21.857	67.7	0	311.46	2		1.06402	0.0269479	0.227611	0.642808		67.7	16	16	0.9298	-0.0316104	19.06	35	67.7	16	16	1.1462	0.0592604	11.818	29	67.7	16	16	1.1303	0.0531937	13.017	38
	317	Tb927.10.11370	Tb927.10.11370		hypothetical protein, conserved	17.772	22.6	0	8.0394	1	1	1.1053	0.0434813	0.227727	0.642585		22.6	3	3	0.909918	-0.0409977	23.906	3	17.8	2	2	1.1185	0.048636	26.048	2	17.8	2	2	1.3268	0.122805	3.9728	2
	480	Tb927.10.2370	Tb927.10.2370	LA	RNA-binding protein, putative (LA)	37.659	9.9	0	8.3028	1		1.29831	0.113379	0.228078	0.641917		9.9	2	2	2.18336	0.339125	132.75	2	9.9	2	2	1.2252	0.088207	25.237	2	3.9	1	1	0.8181	-0.0871936	NaN	1
	792	Tb927.11.14080	Tb927.11.14080	CYC2	cyclin 2,G1 cyclin (CYC2)	24.301	17.1	0	38.786	1		1.08115	0.0338851	0.228381	0.64134		17.1	3	3	1.23335	0.0910863	24.45	7	17.1	3	3	0.9216	-0.0354575	33.468	7	17.1	3	3	1.1118	0.0460267	3.2752	4
	275	Tb927.1.4500	Tb927.1.4500		hypothetical protein, conserved	32.525	9.5	0	17.194	1		0.89804	-0.0467045	0.228638	0.640852		9.5	2	2	1.13605	0.0553989	21.744	2	9.5	2	2	0.80619	-0.0935626	NaN	1	9.5	2	2	0.79077	-0.10195	41.971	2
	1096	Tb927.11.9170	Tb927.11.9170		DNA topoisomerase III, putative	93.688	11.1	0	28.055	1		1.09946	0.0411813	0.22878	0.640582		7.7	5	5	0.947598	-0.0233759	7.1578	5	9.8	6	6	1.0445	0.0189084	11.228	3	8.7	5	5	1.3428	0.128011	32.308	5
	1293	Tb927.3.5050	Tb927.3.5050		60S ribosomal protein L4	41.856	63.6	0	203.22	1		1.06793	0.0285426	0.229068	0.640035		62.3	24	24	0.924556	-0.0340667	21.124	81	63.6	24	24	1.1479	0.0599041	17.647	66	63.6	24	24	1.1476	0.0597905	19.613	69
	1354	Tb927.4.2180	Tb927.4.2180		60S ribosomal protein L35a, putative	17.021	69.8	0	98.168	1		1.06765	0.0284299	0.22933	0.639539		61.1	17	17	0.928333	-0.0322963	26.264	52	69.8	18	18	1.1787	0.0714033	11.728	40	69.1	17	17	1.1122	0.0461829	25.183	49
	381	Tb927.10.13800	Tb927.10.13800		hypothetical protein, conserved	34.401	28.5	0	60.152	1		1.05	0.021191	0.229356	0.63949		25.4	10	10	0.945537	-0.0243214	14.137	29	25.4	10	10	1.0851	0.0354698	21.705	34	28.5	11	11	1.1283	0.0524246	25.21	22
	878	Tb927.11.1990	Tb927.11.1990		arginyl-tRNA synthetase, putative	78.432	2.2	0.0061148	2.2572	1	1	0.947635	-0.0233591	0.229375	0.639453		2.2	1	1	0.870549	-0.0602066	NaN	1	2.2	1	1	1.0617	0.0260018	NaN	1	2.2	1	1	0.92072	-0.0358724	NaN	1
	147	Tb927.10.6310;Tb11.v5.0275	Tb927.10.6310;Tb11.v5.0275	MVP	major vault protein, putative (MVP) ;major vault protein, putative	96.198	23.4	0	130.99	2		1.11032	0.0454482	0.229384	0.639438		22	15	15	0.890631	-0.0503024	15.62	16	22.2	14	14	1.1716	0.0687794	21.678	16	20.8	13	13	1.3118	0.117868	15.353	16
	2038	Tb927.9.11410;Tb927.9.11380	Tb927.9.11410;Tb927.9.11380		unspecified product ;unspecified product	14.962	68.3	0	167.84	2		1.08459	0.0352672	0.229386	0.639432		68.3	11	11	0.907359	-0.042221	16.571	27	68.3	11	11	1.1851	0.073755	14.36	30	68.3	10	10	1.1865	0.0742677	12.719	30
	940	Tb927.11.3570	Tb927.11.3570		aminopeptidase, putative,metallo-peptidase, Clan MA(E) Family M1	98.098	2	0	10.304	1		1.35176	0.130901	0.229556	0.639112		0	0	0				0	2	1	1	1.7619	0.245981	NaN	1	2	1	1	1.0371	0.0158206	NaN	1
	249	Tb927.1.2550;Tb927.1.2530;Tb927.1.2510;Tb927.1.2490;Tb927.1.2470;Tb927.1.2450;Tb927.1.2430	Tb927.1.2550;Tb927.1.2530;Tb927.1.2510;Tb927.1.2490;Tb927.1.2470;Tb927.1.2450;Tb927.1.2430		histone H3, putative ;histone H3, putative ;histone H3, putative ;histone H3, putative ;histone H3, putative ;histone H3, putative ;histone H3, putative	14.75	12.8	0	10.021	7		0.892647	-0.0493201	0.229775	0.638696		12.8	2	2	0.982608	-0.00761977	16.344	5	12.8	2	2	1.0391	0.0166573	6.4054	4	12.8	2	2	0.69663	-0.156998	81.438	4
	1594	Tb927.6.3250	Tb927.6.3250		hypothetical protein, conserved	35.519	8	0	72.761	1		1.09895	0.0409791	0.230169	0.637954		8	2	2	0.892857	-0.049218	0.059569	2	8	2	2	1.2343	0.0914207	1.498	2	8	2	2	1.2043	0.0807347	5.6121	2
	1252	Tb927.3.3320;Tb927.3.3310	Tb927.3.3320;Tb927.3.3310		60S ribosomal protein L13, putative ;60S ribosomal protein L13, putative	25.427	51.8	0	71.99	2		1.0672	0.028244	0.230253	0.637794		50.9	13	13	0.924813	-0.0339462	11.204	65	48.6	13	13	1.1366	0.0556077	10.299	62	47.2	13	13	1.1563	0.0630705	21.136	67
	1350	Tb927.4.2040	Tb927.4.2040	ALBA3	ALBA-Domain Protein (ALBA3)	20.808	55.3	0	96.856	1		1.03568	0.0152252	0.230407	0.637504		50	11	4	0.962464	-0.0166155	10.499	7	50	11	4	1.0978	0.0405232	10.35	6	55.3	12	5	1.0514	0.021768	13.847	8
	96	Tb927.9.15870;Tb09.v4.0109;Tb09.v4.0015	Tb927.9.15870;Tb09.v4.0109;Tb09.v4.0015		hypothetical protein ;hypothetical protein,chrIX additional, unordered contigs ;hypothetical protein,chrIX additional, unordered contigs	25.1	9.5	0	4.6495	3		0.929163	-0.0319083	0.23081	0.636745		9.5	2	2	0.95584	-0.0196147	30.49	2	6.5	1	1	0.79746	-0.0982911	NaN	1	9.5	2	2	1.0524	0.0221808	10.86	2
	132	Tb927.10.6060;Tb11.v5.0199	Tb927.10.6060;Tb11.v5.0199		universal minicircle sequence binding protein (UMSBP), putative,DNA-binding protein HEXBP, putative,zinc finger protein ;universal minicircle sequence binding protein, putative	21.836	79.8	0	198.81	2		1.05949	0.0250973	0.230817	0.636733		68.5	8	7	0.932314	-0.0304378	7.741	15	79.8	10	9	1.1259	0.0514998	14.913	22	75.6	9	8	1.133	0.0542299	32.413	25
	1307	Tb927.3.5600	Tb927.3.5600		hypothetical protein, conserved	31.553	30.3	0	9.447	1	1	1.06499	0.0273444	0.231021	0.636349		17.7	4	4	1.20499	0.0809847	10.071	5	30.3	6	6	0.94648	-0.0238886	10.649	5	25.8	5	5	1.0591	0.024937	10.723	6
	1130	Tb927.2.2260	Tb927.2.2260		phosphatidylinositol kinase related protein, putative	468.48	0.6	0	4.074	1		1.21382	0.0841559	0.231175	0.636058		0.3	1	1	1.44179	0.158903	NaN	1	0	0	0				0	0.6	2	2	1.0219	0.0094084	NaN	1
	449	Tb927.10.16060	Tb927.10.16060		hypothetical protein, conserved	13.498	41.7	0	15.729	1	1	1.02847	0.0121902	0.231353	0.635725		41.7	6	6	0.982415	-0.00770511	24.055	12	41.7	6	6	1.0145	0.00625205	19.675	11	41.7	5	5	1.0915	0.0380237	39.058	9
	1266	Tb927.3.3670	Tb927.3.3670	TRRM3	RNA-binding protein, putative (TRRM3)	66.931	21.5	0	61.554	1		1.04609	0.0195689	0.231752	0.634976		21.5	10	10	0.976658	-0.0102575	16.436	20	18.1	9	9	1.0163	0.00702193	7.7577	14	21.5	10	10	1.1533	0.0619423	44.635	21
	1039	Tb927.11.6510;Tb927.11.6500	Tb927.11.6510;Tb927.11.6500		40S ribosomal protein S21, putative ;40S ribosomal protein S21, putative	21.118	26.3	0	77.625	2		1.0638	0.0268592	0.231989	0.634533		26.3	4	4	0.92885	-0.0320544	17.33	18	26.3	4	4	1.1623	0.0653182	17.87	23	26.3	4	4	1.1151	0.0473138	11.044	17
	1865	Tb927.8.2200	Tb927.8.2200		terbinafine resistance locus protein (yip1), putative	20.718	10.1	0	4.0223	1		1.1065	0.0439504	0.232324	0.633905		10.1	2	2	0.887784	-0.0516926	18.118	2	10.1	2	2	1.1831	0.0730215	7.5877	2	10.1	2	2	1.2898	0.110522	24.909	2
	1489	Tb927.5.3230	Tb927.5.3230		hypothetical protein, conserved	240.99	30	0	323.31	1		1.04287	0.0182283	0.232389	0.633784		27.3	50	50	0.960154	-0.0176593	20.098	74	28.3	50	50	1.0461	0.0195732	19.217	78	25.7	47	47	1.1292	0.0527709	19.787	79
	1205	Tb927.3.1590	Tb927.3.1590	MRB1590	mitochondrial RNA binding complex 1 subunit (MRB1590)	72.678	45.1	0	293.97	1		1.08056	0.0336496	0.232602	0.633386		43.3	23	23	0.908926	-0.0414716	15.813	27	42.1	22	22	1.1857	0.0739748	16.706	28	45.1	24	24	1.1707	0.0684456	15.389	32
	145	Tb927.7.4570;Tb11.v5.0270	Tb927.7.4570;Tb11.v5.0270	IG-NH	inosine-guanine nucleoside hydrolase (IG-NH) ;nucleoside hydrolase, putative	39.39	3.6	0	5.7595	2		1.32441	0.122024	0.233199	0.632274		0	0	0				0	3.6	1	1	1.7053	0.231801	NaN	1	3.6	1	1	1.0286	0.0122465	NaN	1
	456	Tb927.10.1720	Tb927.10.1720		ATP-dependent DEAD/H RNA helicase, putative	66.419	3.5	0	8.4683	1		1.8277	0.261904	0.233436	0.631832		3.5	2	2	7.06564	0.849151	260.53	2	2.3	1	1	0.88438	-0.0533611	NaN	1	2.3	1	1	0.97706	-0.0100788	NaN	1
	1933	Tb927.8.4950	Tb927.8.4950		kinesin, putative	165.15	24.5	0.0010055	2.9738	1	1	0.634599	-0.1975	0.233604	0.631519		24.5	3	3	0.956389	-0.0193656	26.988	4	19.8	1	1	0.42108	-0.375635	NaN	1	19.8	1	1				0
	1581	Tb927.6.2640	Tb927.6.2640	TbKap60	importin alpha subunit, putative (TbKap60)	58.065	20.5	0	47.4	1		1.06043	0.0254812	0.2338	0.631156		18.9	7	7	0.929541	-0.0317315	10.61	13	20.5	8	8	1.1257	0.0514227	18.118	14	18	7	7	1.1396	0.0567524	15.53	10
	318	Tb927.10.11390	Tb927.10.11390		60S ribosomal protein L6, putative	21.185	61.5	0	317.25	1		1.06973	0.0292741	0.233918	0.630935		61.5	17	17	0.919202	-0.036589	17.464	28	61.5	16	16	1.1551	0.0626196	26.54	28	61.5	18	18	1.1529	0.0617916	17.513	28
	462	Tb927.10.190	Tb927.10.190		40S ribosomal protein S6, putative	28.44	26.8	0	49.613	1		1.08267	0.0344973	0.234233	0.630352		26.4	6	2	0.905633	-0.0430477	15.826	3	26.8	7	2	1.197	0.0780942	1.8127	2	26.4	6	2	1.1707	0.0684456	8.1798	3
	1407	Tb927.8.7410;Tb927.4.5010	Tb927.8.7410;Tb927.4.5010		calreticulin, putative ;calreticulin, putative	45.021	17	0	26.706	2		1.09489	0.039371	0.23439	0.630062		10.9	3	3	1.30657	0.116134	27.903	4	17	5	5	0.91691	-0.0376733	15.374	5	17	5	5	1.0956	0.039652	20.603	6
	501	Tb927.10.3150	Tb927.10.3150		N-acetyltransferase, putative	23.621	19	0	10.168	1		1.11075	0.0456172	0.234649	0.629582		14.1	3	3	0.878426	-0.0562949	9.2797	3	19	5	5	1.2119	0.0834668	8.9473	4	19	5	5	1.2873	0.10968	13.13	6
	1971	Tb927.8.6170	Tb927.8.6170	TK	transketolase, putative (TK)	72.609	7.3	0	8.4453	1		1.03203	0.0136911	0.234688	0.629508		0	0	0				0	7.3	2	2	1.062	0.0261245	21.812	2	4.2	1	1	1.0029	0.00125763	NaN	1
	1678	Tb927.7.2070	Tb927.7.2070		heat shock protein DNAJ, putative	36.377	16.5	0	13.261	1	1	1.04895	0.0207564	0.234791	0.629318		14	4	4	0.957671	-0.0187837	19.179	5	16.5	6	6	1.0439	0.0186589	12.386	7	14	5	5	1.1545	0.0623939	28.897	6
	455	Tb927.10.170	Tb927.10.170		pseudouridine synthase, Cbf5p	48.285	72.4	0	323.31	1		1.05846	0.0246733	0.235099	0.628748		70.5	31	31	0.930839	-0.0311256	17.367	67	72.4	33	33	1.1345	0.0548045	16.954	82	72.4	33	33	1.1229	0.0503411	10.636	100
	1422	Tb927.4.770	Tb927.4.770	upl3	ubiquitin-protein ligase, putative (upl3)	142.06	28.9	0	305.47	1		1.05765	0.024344	0.235149	0.628657		26	30	30	0.931793	-0.0306807	14.411	53	26	29	29	1.1193	0.0489465	17.334	55	27.4	30	30	1.1344	0.0547662	15.479	46
	115	Tb927.4.1100;Tb927.11.680;Tb11.0880	Tb927.4.1100;Tb927.11.680;Tb11.0880		ribosomal protein L21E (60S), putative ;ribosomal protein L21E (60S), putative ;60S ribosomal protein L21e, putative,chrXI additional, unordered contigs	18.015	59.1	0	46.612	3		1.07247	0.0303862	0.235504	0.628002		54.7	9	9	0.915081	-0.0385407	12.525	42	58.5	9	9	1.1582	0.0637836	12.754	47	54.1	8	8	1.1639	0.0659157	17.445	48
	1351	Tb927.4.2070;Tb11.v5.0410;Tb11.v5.0881	Tb927.4.2070;Tb11.v5.0410;Tb11.v5.0881		antigenic protein, putative ;antigenic protein, conserved ;antigenic protein, putative	511.32	23	0	45.905	3		0.935376	-0.0290137	0.23561	0.627806		11.9	3	3	1.05113	0.0216551	21.138	3	11.9	3	3	0.9596	-0.0179098	8.4822	3	23	4	4	0.81136	-0.0907864	29.663	4
	259	Tb927.1.3180	Tb927.1.3180		40S ribosomal protein S11, putative	20.059	51.7	0	8.9441	1		1.11952	0.0490336	0.235755	0.627539		51.7	12	1	0.870019	-0.0604712	7.4049	2	51.7	12	1	1.3227	0.121461	12.344	2	51.7	12	1	1.2193	0.0861106	11.852	2
	375	Tb927.11.9710;Tb927.10.13500	Tb927.11.9710;Tb927.10.13500	RPL10A	60S ribosomal protein L10a, putative (RPL10A) ;60S ribosomal protein L10a	24.597	67.3	0	293.36	2		1.07131	0.0299165	0.235978	0.627129		67.3	24	24	0.917011	-0.0376257	33.817	43	67.3	24	24	1.1771	0.0708134	14.909	45	67.3	24	24	1.1391	0.0565619	12.192	40
	2181	Tb927.9.7080	Tb927.9.7080		hypothetical protein, conserved	13.925	38.1	0	61.234	1		1.05769	0.0243585	0.236235	0.626657		38.1	4	4	0.933097	-0.0300732	13.712	7	38.1	4	4	1.1504	0.0608489	11.181	8	38.1	4	4	1.1023	0.0422998	7.5507	6
	1884	Tb927.8.2910;Tb927.8.2930;Tb927.8.2920;Tb927.8.2900;Tb927.8.2940	Tb927.8.2910;Tb927.8.2930;Tb927.8.2920;Tb927.8.2900;Tb927.8.2940		mannosyl-oligosaccharide 1,2-alpha-mannosidase IB, putative ;mannosyl-oligosaccharide 1,2-alpha-mannosidase IB, putative ;mannosyl-oligosaccharide 1,2-alpha-mannosidase IB, putative ;mannosyl-oligosaccharide 1,2-alpha-mannosidase IB (pseudogene), putative,	65.812	6.8	0	7.2618	5		1.04103	0.0174618	0.236287	0.62656		6.8	4	4	1.10069	0.0416655	15.742	4	6.8	4	4	0.95065	-0.0219793	13.664	4	6.8	4	4	1.0782	0.0326993	65.121	3
	2225	Tb927.9.9740	Tb927.9.9740		AMP deaminase, putative	163.28	3.7	0	5.0193	1		0.346207	-0.460664	0.236404	0.626346		3.7	3	3	0.130748	-0.883565	309	2	0.8	1	1	0.91672	-0.0377633	NaN	1	0	0	0				0
	226	Tb927.10.2110;Tb927.10.2100;Tb11.v5.1046;Tb927.10.2090	Tb927.10.2110;Tb927.10.2100;Tb11.v5.1046;Tb927.10.2090	TEF1	elongation factor 1-alpha (TEF1) ;elongation factor 1-alpha,EF-1-alpha (TEF1) ;elongation factor 1-alpha, putative ;elongation factor 1-alpha,EF-1-alpha (TEF1)	49.105	76.4	0	226.12	4		1.06675	0.028062	0.236801	0.625617		75.9	35	35	0.920471	-0.0359898	33.836	163	76.4	36	36	1.1427	0.0579322	23.099	176	76.4	35	35	1.1541	0.0622434	22.709	185
	1312	Tb927.3.640	Tb927.3.640		hypothetical protein, conserved	32.723	9.1	0	32.157	1		1.0653	0.0274704	0.236889	0.625455		9.1	2	2	0.94509	-0.0245267	3.2064	2	9.1	2	2	1.0544	0.0230054	18.049	2	9.1	2	2	1.2132	0.0839324	2.6291	2
	1318	Tb927.3.780	Tb927.3.780	TbPSA7	proteasome alpha 7 subunit (TbPSA7)	25.463	6.3	0	23.268	1		1.12639	0.0516894	0.236926	0.625387		6.3	1	1	1.16442	0.066108	49.514	2	6.3	1	1	1.3997	0.146035	NaN	1	6.3	1	1	0.87685	-0.0570747	NaN	1
	1588	Tb927.6.2930	Tb927.6.2930		hypothetical protein, conserved	59.606	2.6	0	4.1046	1		1.19468	0.0772526	0.237157	0.624964		0	0	0				0	2.6	1	1	1.4077	0.14851	NaN	1	2.6	1	1	1.0139	0.00599512	NaN	1
	615	Tb927.10.7850	Tb927.10.7850		protein-L-isoaspartate, putative	25.68	7.5	0	10.085	1		1.16912	0.0678592	0.237203	0.62488		7.5	2	2	0.825219	-0.0834309	23.027	2	7.5	2	2	1.2972	0.113007	12.148	2	7.5	2	2	1.4928	0.174002	33.781	2
	657	Tb927.10.9400	Tb927.10.9400		branch point binding protein, putative	31.63	22.9	0	7.783	1		1.08253	0.0344412	0.237522	0.624296		12.9	3	3	0.903424	-0.0441084	12.857	3	17.3	4	4	1.2044	0.0807707	25.105	4	22.9	5	5	1.1659	0.0666613	45.819	5
	783	Tb927.11.13660	Tb927.11.13660		hypothetical protein, conserved	15.677	10.4	0	4.3203	1		1.1614	0.0649833	0.238469	0.622568		10.4	1	1	0.829738	-0.0810591	8.1672	2	10.4	1	1	1.2863	0.109342	NaN	1	10.4	1	1	1.4678	0.166667	NaN	1
	2019	Tb927.9.10250	Tb927.9.10250	Sm-F	small nuclear ribonucleoprotein Sm-F (Sm-F)	8.3616	38.7	0	13.364	1		1.0581	0.024527	0.238919	0.621749		38.7	2	2	0.941974	-0.0259609	5.7154	2	38.7	2	2	1.1804	0.0720292	9.8549	4	38.7	2	2	1.0654	0.0275127	6.1224	3
	949	Tb927.11.3930	Tb927.11.3930		hypothetical protein, conserved	44.141	5.6	0	4.7005	1		0.935061	-0.0291602	0.238942	0.621707		5.6	1	1	0.923702	-0.034468	NaN	1	5.6	1	1	1.0756	0.0316508	NaN	1	5.6	1	1	0.82288	-0.0846635	23.848	2
	1654	Tb927.6.720;Tb927.11.11230	Tb927.6.720;Tb927.11.11230		40S ribosomal protein L14, putative ;60S ribosomal protein L14, putative	21.443	45.5	0	69.998	2		1.06975	0.0292841	0.239026	0.621555		45.5	15	15	0.916506	-0.0378646	26.364	22	45.5	15	15	1.1754	0.0701857	15.325	27	45	15	15	1.1364	0.0555312	29.9	32
	1013	Tb927.11.5840	Tb927.11.5840		Protein translation factor SUI1 homolog, putative	12.738	56.9	0	169.28	1		1.10456	0.0431905	0.239586	0.620538		56.9	6	6	0.87943	-0.0557987	9.8623	8	47.7	5	5	1.2754	0.105646	11.911	9	38.5	5	5	1.2015	0.0797238	6.2241	10
	799	Tb927.11.14330	Tb927.11.14330		hypothetical protein, conserved	176.83	2.3	0	8.59	1		1.09474	0.0393113	0.239997	0.619793		1.6	2	2	0.889917	-0.0506504	4.4076	2	2.3	3	3	1.2528	0.0978817	15.186	3	2.3	3	3	1.1768	0.0707027	22.166	3
	977	Tb927.11.4700	Tb927.11.4700		prostaglandin f synthase	30.992	38.4	0	91.659	1		1.03515	0.0150017	0.240328	0.619195		29.3	6	6	0.962742	-0.0164901	18.983	5	38.4	8	8	1.1061	0.0437944	12.846	8	38.4	8	8	1.0416	0.017701	16.853	12
	564	Tb927.10.5770	Tb927.10.5770	VCP	valosin-containing protein homolog,Transitional endoplasmic reticulum ATPase, putative (VCP)	85.825	33.5	0	267.87	1		1.09749	0.0403988	0.240428	0.619015		33.5	19	19	0.883783	-0.0536546	12.711	29	30.8	18	18	1.2204	0.0865022	13.9	31	30.8	17	17	1.2256	0.0883488	15.402	28
	719	Tb927.11.11370;Tb927.11.11360	Tb927.11.11370;Tb927.11.11360	RACK1	receptor for activated C kinase 1 (RACK1) ;receptor for activated C kinase 1 (RACK1)	34.69	43.7	0	224.51	2		1.06784	0.0285062	0.240488	0.618907		43.7	12	12	0.91659	-0.0378248	40.073	34	43.7	12	12	1.1591	0.0641209	15.411	35	43.7	12	12	1.1461	0.0592225	18.717	38
	185	Tb927.10.7100;Tb11.v5.0580	Tb927.10.7100;Tb11.v5.0580		delta-4 fatty acid desaturase ;delta-6 fatty acid desaturase, putative	47.965	10.5	0	44.96	2		1.06326	0.0266385	0.240701	0.618523		8.8	3	3	1.22329	0.0875282	6.2799	4	8.8	3	3	0.96734	-0.0144209	9.4703	6	5.9	3	3	1.0158	0.00680821	19.388	4
	1358	Tb927.4.2320	Tb927.4.2320		hypothetical protein, conserved	15.722	11.1	0.0038873	2.568	1		1.04672	0.0198295	0.240714	0.618498		11.1	1	1	1.00397	0.00171886	NaN	1	11.1	1	1	0.98184	-0.00795928	NaN	1	11.1	1	1	1.1634	0.0657291	NaN	1
	285	Tb927.1.740	Tb927.1.740		hypothetical protein, conserved	48.865	3.2	0	15.441	1	1	0.94496	-0.0245864	0.24073	0.618471		3.2	1	1	0.895817	-0.0477809	NaN	1	3.2	1	1	0.9968	-0.00139197	NaN	1	3.2	1	1				0
	1681	Tb927.7.2170	Tb927.7.2170		hypothetical protein, conserved	168.67	18.7	0	101.32	1		1.0535	0.0226329	0.241041	0.61791		18.6	23	23	0.942329	-0.0257972	18.649	22	16.4	22	22	1.0678	0.0284899	13.946	21	15.1	20	20	1.162	0.0652061	16.923	22
	1009	Tb927.11.5730	Tb927.11.5730		pre-mRNA splicing factor, putative,ATP- dependent RNA helicase, putative	116.62	2.9	0	9.9674	1		0.817971	-0.0872623	0.241525	0.617038		1.5	1	1	0.676087	-0.169998	NaN	1	0	0	0				0	1.3	1	1	0.98963	-0.00452715	5.5967	2
	1314	Tb927.3.720	Tb927.3.720	ZFP3	zinc finger protein 2, putative (ZFP3)	14.168	12.3	0	3.6118	1		1.06531	0.0274777	0.242072	0.616056		12.3	2	2	0.944644	-0.0247319	3.5013	3	12.3	2	2	1.0489	0.0207341	9.4959	3	12.3	2	2	1.2202	0.086431	7.1243	2
	128	Tb927.7.5020;Tb927.7.5000;Tb11.v5.0182;Tb11.v5.0181	Tb927.7.5020;Tb927.7.5000;Tb11.v5.0182;Tb11.v5.0181		60S ribosomal protein L19, putative ;60S ribosomal protein L19, putative ;60S ribosomal protein L19, putative ;60S ribosomal protein L19, putative	29.408	22.3	0	38.084	4		1.07109	0.0298271	0.242111	0.615985		19.2	6	6	0.912492	-0.0397709	12.797	25	22.3	7	7	1.1793	0.0716243	13.628	16	19.2	6	6	1.1419	0.0576281	30.995	14
	604	Tb927.10.7470	Tb927.10.7470	RBP15	RNA-binding protein, putative (RBP15)	13.338	18.8	0	6.5451	1		1.08082	0.0337552	0.243486	0.613526		18.8	2	2	0.900252	-0.0456359	17.482	4	18.8	2	2	1.2051	0.0810231	33.073	4	18.8	2	2	1.1638	0.0658784	1.3398	2
	678	Tb927.11.10030	Tb927.11.10030		60S ribosomal protein L29, putative	8.2224	53.5	0	23.621	1		1.06428	0.0270546	0.243535	0.613439		53.5	5	5	0.919202	-0.036589	20.725	23	53.5	5	5	1.1614	0.0649818	8.9776	17	53.5	4	4	1.1292	0.0527709	9.6358	16
	536	Tb927.10.4740	Tb927.10.4740		nucleolar RNA-binding protein, putative	7.4056	71.4	0	52.574	1		1.05958	0.0251337	0.243726	0.613099		71.4	8	8	0.923958	-0.0343477	13.006	40	71.4	9	9	1.141	0.0572856	38.708	32	71.4	8	8	1.1284	0.0524631	24.266	30
	1420	Tb927.4.750	Tb927.4.750		50S ribosomal protein L7Ae, putative	16.32	62.1	0	67.359	1		1.05879	0.0248116	0.243778	0.613005		54.5	10	10	0.924727	-0.0339864	11.131	21	62.1	12	12	1.1319	0.0538081	14.386	23	62.1	11	11	1.134	0.0546131	12.066	22
	2056	Tb927.9.12510	Tb927.9.12510	DED1	ATP-dependent DEAD/H RNA helicase, putative (DED1)	82.74	71.4	0	323.31	1	1	1.04728	0.0200634	0.244232	0.612198		71.4	71	70	0.938438	-0.0275942	30.104	372	71.4	72	71	1.105	0.0433623	13.541	404	71.4	70	69	1.1077	0.0444222	16.128	406
	161	Tb927.1.1130;Tb11.v5.0384	Tb927.1.1130;Tb11.v5.0384		glycerol-3-phosphate dehydrogenase (FAD-dependent), putative ;glycerol-3-phosphate dehydrogenase (FAD-dependent),putative	66.174	6.5	0	6.4335	2	1	1.09035	0.0375667	0.244392	0.611913		6.5	2	2	1.18531	0.0738325	68.942	2	4.1	1	1	1.003	0.00130093	NaN	1	0	0	0				0
	1922	Tb927.8.4540	Tb927.8.4540		PAB1-binding protein , putative	59.599	9.1	0	18.017	1		1.04366	0.0185583	0.244863	0.611076		9.1	4	4	0.943574	-0.0252239	35.64	8	9.1	5	5	1.0839	0.0349892	12.139	9	9.1	4	4	1.1115	0.0459095	14.643	10
	1344	Tb927.4.1800;Tb927.4.1790	Tb927.4.1800;Tb927.4.1790		ribosomal protein L3, mitochondrial, putative ;ribosomal protein L3, putative	48.691	55.5	0	261.96	2		1.07859	0.0328575	0.245045	0.610755		51.7	22	22	0.900495	-0.0455186	23.995	57	52.9	22	22	1.1841	0.0733884	43.277	63	46.9	19	19	1.1768	0.0707027	26.88	68
	1273	Tb927.3.3970	Tb927.3.3970		hypothetical Zinc-finger containing protein	32.553	25.3	0	179.85	1		1.05826	0.0245941	0.245061	0.610726		22.6	6	6	0.924984	-0.0338659	20.388	7	25.3	7	7	1.1435	0.0582362	10.55	8	25.3	7	7	1.1205	0.0494119	11.253	7
	1204	Tb927.3.1430	Tb927.3.1430		chaperone protein DNAj, putative	43.049	8.9	0.0005071	3.0389	1		0.893845	-0.0487379	0.24514	0.610586		0	0	0				0	8.9	2	2	0.80166	-0.0960098	13.341	2	3.1	1	1	0.99663	-0.00146604	NaN	1
	754	Tb927.11.12640	Tb927.11.12640		hypothetical protein, conserved	106.76	1.5	0	10.768	1		0.732375	-0.135267	0.24608	0.608924		1.5	1	1	0.540453	-0.267242	NaN	1	1.5	1	1	0.99245	-0.00329136	NaN	1	0	0	0				0
	175	Tb11.v5.0485;Tb927.10.9280	Tb11.v5.0485;Tb927.10.9280		hypothetical protein, conserved ;hypothetical protein, conserved	101.8	1.7	0	4.6316	2		2.06089	0.314054	0.246136	0.608826		0	0	0				0	1.7	1	1	1.0175	0.00753442	88.404	2	1.7	1	1	4.1742	0.620573	NaN	1
	1510	Tb927.5.3940	Tb927.5.3940		helicase, putative	74.909	3.4	0	26.188	1		0.965969	-0.015037	0.246218	0.608681		3.4	2	2	0.953016	-0.0208997	9.7824	2	3.4	2	2	0.90583	-0.0429533	33.461	2	3.4	2	2	1.0441	0.0187421	9.583	2
	744	Tb927.11.12240	Tb927.11.12240		ubiquitin carboxyl-terminal hydrolase, putative,cysteine peptidase, Clan CA, family C19, putative	89.061	4.3	0	5.8065	1	1	1.2809	0.107517	0.246433	0.608301		2	1	1	1.73316	0.238839	NaN	1	3	2	2	0.70651	-0.150882	130.22	2	4.3	3	3	1.7163	0.234593	31.727	4
	97	Tb09.v4.0067	Tb09.v4.0067		retrotransposon hot spot protein, pseudogene,chrIX additional, unordered contigs	62.718	12.6	0.0069767	2.1568	1		1.09488	0.0393669	0.246535	0.608122		12.6	7	1	0.901551	-0.0450099	NaN	1	12.6	7	1	1.1076	0.0443829	NaN	1	10.9	6	1	1.3144	0.118728	NaN	1
	307	Tb927.10.10850	Tb927.10.10850	AGO1	argonaute-like protein (AGO1)	99.184	36.7	0	207.3	1		1.08957	0.0372542	0.247062	0.607194		36.1	31	31	0.887548	-0.0518083	21.091	47	36.5	32	32	1.2359	0.0919833	14.546	39	32	28	28	1.1792	0.0715875	18.198	54
	1047	Tb927.11.6790	Tb927.11.6790		predicted WD40 repeat protein	89.011	6.5	0	8.7418	1		1.10758	0.0443758	0.247411	0.606581		6.5	4	4	0.895736	-0.0478198	9.6648	4	6.5	4	4	1.1043	0.0430871	16.743	6	4.9	3	3	1.3736	0.13786	25.636	5
	917	Tb927.11.2950	Tb927.11.2950	TbNup89	Nucleoporin (TbNup89)	89.154	4.9	0	22.502	1		1.17583	0.0703431	0.247956	0.605625		4.9	3	3	0.956206	-0.0194486	38.046	4	4.9	3	3	0.97674	-0.010221	30.439	3	3.6	2	2	1.7406	0.240699	15.313	3
	1677	Tb927.7.1910	Tb927.7.1910	GCVP	pyridoxal phosphate containing glycine decarboxylase, putative (GCVP)	106.29	3	0	18.654	1	1	1.07648	0.0320072	0.248043	0.605474		3	3	3	0.922169	-0.0351895	29.75	3	3	3	3	1.0765	0.032014	21.487	3	2.2	2	2	1.2566	0.0991971	0.020531	2
	1792	Tb927.7.6360	Tb927.7.6360	h2aZ	histone H2A variant (h2aZ)	18.667	22.3	0	69.154	1		1.06492	0.0273184	0.248194	0.605208		22.3	4	4	0.914328	-0.0388982	8.2253	7	22.3	4	4	1.1429	0.0580082	21.386	6	22.3	4	4	1.1557	0.0628451	6.4131	5
	2111	Tb927.9.1850;Tb927.9.1810	Tb927.9.1850;Tb927.9.1810		60S ribosomal protein L35, putative ;60S ribosomal protein L35, putative	15.144	44.9	0	17.348	2		1.07965	0.0332841	0.248261	0.605092		40.9	8	8	0.897827	-0.0468072	8.8583	10	36.2	8	8	1.209	0.0824263	26.443	10	36.2	8	8	1.1594	0.0642333	12.5	11
	334	Tb927.10.12030	Tb927.10.12030		hypothetical protein, conserved	27.19	25.6	0	39.46	1		1.06791	0.0285346	0.248568	0.604555		19.6	5	5	0.913659	-0.0392158	10.602	8	24.4	6	6	1.1893	0.0752914	16.862	8	20.8	6	6	1.1208	0.0495281	28.3	11
	2051	Tb927.9.12240;Tb927.9.12200	Tb927.9.12240;Tb927.9.12200		unspecified product ;unspecified product	21.692	40.4	0	84.679	2		1.07269	0.0304722	0.249303	0.603273		40.4	11	11	0.903914	-0.0438729	23.929	34	39.4	10	10	1.1725	0.0691129	47.893	40	40.4	11	11	1.1646	0.0661768	23.721	31
	881	Tb927.11.2060;Tb927.11.2050	Tb927.11.2060;Tb927.11.2050		60S acidic ribosomal subunit protein, putative ;60S acidic ribosomal subunit protein, putative	34.627	60.8	0	323.31	2		1.0665	0.0279605	0.249548	0.602846		60.8	15	15	0.911411	-0.0402858	26.272	24	50.3	14	14	1.1462	0.0592604	9.8484	20	60.8	16	16	1.1612	0.064907	40.313	21
	373	Tb927.10.13360	Tb927.10.13360		elongation factor Tu, putative	51.849	16.4	0	19.39	1	1	1.02548	0.0109252	0.249559	0.602826		10.9	4	4	1.06431	0.0270662	20.226	4	16.4	6	6	1.0502	0.021272	8.5361	5	13.6	5	5	0.9648	-0.0155627	38.973	4
	1084	Tb927.11.8770	Tb927.11.8770		ATP-dependent RNA helicase FAL1, putative	45.516	9.5	0	10.644	1		0.889504	-0.0508519	0.249604	0.602748		7.5	2	2	0.668807	-0.174699	32.637	2	9.5	3	3	1.0044	0.0019067	8.0932	3	4.7	2	2	1.0477	0.0202369	1.5314	2
	1466	Tb927.5.2400	Tb927.5.2400		ubiquitin carboxyl-terminal hydrolase, putative,cysteine peptidase, Clan CA, family C19, putative	108.26	17.6	0	58.546	1		1.07365	0.030861	0.250537	0.601128		9.6	7	7	0.902853	-0.0443829	27.625	12	11.9	9	9	1.1494	0.0604712	33.655	11	14.8	11	11	1.1926	0.0764948	52.996	15
	835	Tb927.11.15900;Tb927.11.15880	Tb927.11.15900;Tb927.11.15880		60S ribosomal protein L27, putative ;60S ribosomal protein L27, putative	15.581	60.9	0	47.814	2		1.06193	0.0260971	0.250645	0.600942		54.9	13	13	0.91617	-0.0380237	16.838	21	54.9	13	13	1.1393	0.0566381	25.023	19	60.9	14	14	1.1473	0.059677	17.959	22
	559	Tb927.8.1110;Tb927.10.5610	Tb927.8.1110;Tb927.10.5610		40S ribosomal protein S9, putative ;40S ribosomal protein S9, putative	22.051	53.2	0	65.807	2		1.06686	0.0281061	0.250652	0.600929		53.2	12	12	0.914662	-0.0387393	25.865	27	49.5	12	12	1.193	0.0766404	49.652	37	53.2	13	13	1.1128	0.0464171	19.372	42
	1020	Tb927.11.6160	Tb927.11.6160	ERF3	eukaryotic release factor 3, putative (ERF3)	76.914	2.4	0	13.59	1		1.10197	0.0421691	0.250951	0.600412		2.4	1	1	0.880902	-0.0550724	NaN	1	2.4	1	1	1.3252	0.122281	NaN	1	2.4	1	1	1.1463	0.0592983	8.5434	2
	244	Tb927.1.2100	Tb927.1.2100		calpain-like cysteine peptidase, putative,cysteine peptidase, Clan CA, family C2, putative	126.15	3.3	0	17.117	1		0.981511	-0.00810477	0.251367	0.599693		3.3	3	3	1.01619	0.00697401	35.991	3	3.3	3	3	0.93968	-0.02702	132.48	3	3.3	3	3	0.99022	-0.00426831	17.825	3
	1835	Tb927.8.1340;Tb927.8.1330	Tb927.8.1340;Tb927.8.1330		60S ribosomal protein L7a, putative ;60S ribosomal protein L7a, putative	30.879	46	0	191.96	2		1.05567	0.0235295	0.251551	0.599373		46	15	15	0.923702	-0.034468	13.779	23	37.3	13	13	1.1369	0.0557223	32.889	20	38	14	14	1.1203	0.0493343	97.635	23
	1462	Tb927.5.2290	Tb927.5.2290		ATP-dependent RNA helicase, putative	249.28	0.9	0.0092123	2.0292	1		0.905052	-0.0433265	0.251891	0.598787		0.9	2	2	0.707614	-0.150204	5.0277	2	0.9	2	2	1.0408	0.0173673	4.7281	3	0.4	1	1	1.0066	0.00285693	NaN	1
	1902	Tb927.8.3410	Tb927.8.3410		hypothetical protein, conserved	170.41	3.6	0	10.603	1		1.05442	0.0230126	0.251914	0.598749		2.6	3	3	0.963391	-0.0161974	7.2433	3	2	2	2	1.0159	0.00685096	NaN	1	2	2	2	1.1978	0.0783843	18.031	2
	488	Tb927.9.15420;Tb927.10.270	Tb927.9.15420;Tb927.10.270		unspecified product ;60S ribosomal protein L32, putative	15.353	47.7	0	56.358	2		1.08548	0.0356211	0.252249	0.59817		47.7	8	8	0.889126	-0.0510367	19.953	21	47.7	8	8	1.1594	0.0642333	23.776	21	47.7	8	8	1.2407	0.0936668	26.543	17
	2145	Tb927.9.4500	Tb927.9.4500		heat shock protein, putative,HSP70-like protein	91.117	7.5	0	37.934	1		1.04632	0.0196634	0.252403	0.597906		6.7	4	4	1.16984	0.0681253	16.579	4	7.5	5	5	0.9785	-0.00943917	20.071	4	4.9	3	3	1.0007	0.0003039	12.352	3
	506	Tb927.10.3260;Tb11.v5.0825	Tb927.10.3260		Long-chain-fatty-acid--CoA ligase 5 (EC 6.2.1.3) (Long-chain acyl-CoA synthetase 5) (LACS 5), putative	78.983	30	0	160.31	2		1.03422	0.0146117	0.254609	0.594125		27.2	14	14	0.954745	-0.0201126	18.789	11	25.3	14	14	1.0513	0.0217267	23.62	14	22.6	12	12	1.1021	0.042221	25.593	12
	658	Tb927.10.9430	Tb927.10.9430	PRS	phosphoribosylpyrophosphate synthetase, putative (PRS)	40.477	6.4	0	3.5707	1		1.11396	0.0468706	0.255452	0.592691		3.7	1	1	0.983284	-0.00732095	8.1433	2	6.4	2	2	0.96158	-0.0170146	NaN	1	6.4	2	2	1.462	0.164947	12.622	3
	2086	Tb927.9.1410	Tb927.9.1410		hypothetical protein, conserved	66.632	13.2	0	36.211	1		1.05975	0.0252048	0.255691	0.592284		9.3	4	4	0.950299	-0.0221396	3.206	3	10.8	5	5	1.0281	0.0120354	12.709	5	6.5	3	3	1.2182	0.0857186	41.556	4
	1019	Tb927.11.6140;Tb927.3.4360	Tb927.11.6140;Tb927.3.4360		40S ribosomal protein S15A, putative ;40S ribosomal protein S15A, putative	14.645	73.1	0	67.451	2		1.06003	0.0253171	0.255828	0.592051		61.5	8	8	0.915248	-0.0384612	12.425	25	73.1	10	10	1.1524	0.0616032	12.968	25	61.5	8	8	1.1293	0.0528093	23.256	28
	1112	Tb927.11.9720	Tb927.11.9720		40S ribosomal protein S27, putative	9.6302	76.7	0	97.189	1		1.05751	0.0242848	0.25586	0.591998		76.7	6	6	0.919456	-0.0364692	18.146	31	76.7	6	6	1.1145	0.0470801	21.672	26	76.7	6	6	1.1541	0.0622434	16.418	28
	2192	Tb927.9.7690	Tb927.9.7690		hypothetical protein, conserved	199.56	7.8	0	49.642	1		1.10889	0.0448869	0.256625	0.590701		7.3	11	11	0.856458	-0.0672941	15.081	16	6	9	9	1.3127	0.118165	27.728	11	6.5	10	10	1.2128	0.0837892	20.133	12
	2159	Tb927.9.5690	Tb927.9.5690		60S acidic ribosomal protein, putative	11.09	92.9	0	183.83	1		1.07573	0.0317042	0.257075	0.589941		92.9	7	7	0.894055	-0.048636	10.594	21	92.9	7	7	1.197	0.0780942	27.207	19	92.9	7	7	1.1632	0.0656544	11.848	18
	125	Tb927.7.4900;Tb11.v5.0171	Tb927.7.4900;Tb11.v5.0171	XRNA	5-3 exonuclease XRNA, putative,exoribonuclease 1, putative (XRNA) ;5-3 exonuclease XRNA, putative	158.67	19.4	0	176.54	2		1.0714	0.0299506	0.257355	0.589467		18.6	23	23	0.899766	-0.0458704	18.419	33	18.8	25	25	1.1491	0.0603578	21.064	46	17.3	21	21	1.1895	0.0753644	19.648	35
	1185	Tb927.2.5610;Tb927.2.5530	Tb927.2.5610;Tb927.2.5530		hypothetical protein, conserved ;hypothetical protein, conserved	162.48	5.7	0	28.031	2		1.09353	0.0388311	0.257486	0.589247		4.9	6	6	0.881368	-0.0548428	23.997	7	4.8	6	6	1.1426	0.0578942	34.376	5	5	6	6	1.2985	0.113442	22.902	5
	1608	Tb927.6.3870	Tb927.6.3870	SGN1	RNA-binding protein, putative (SGN1)	22.904	46.3	0	187.03	1		1.05178	0.0219248	0.258221	0.588009		46.3	10	10	0.93006	-0.0314893	23.004	14	38.8	9	9	1.1576	0.0635585	14.108	11	46.3	9	9	1.0807	0.0337052	12.241	12
	404	Tb927.10.14550;REV__Tb927.6.1430	Tb927.10.14550		ATP-dependent DEAD/H RNA helicase, putative	71.366	52.1	0	323.31	2		1.05757	0.0243104	0.258642	0.587301		52.1	41	40	0.91878	-0.0367885	12.044	204	51.1	39	38	1.1634	0.0657291	27.535	195	52.1	43	42	1.1066	0.0439907	13.864	246
	915	Tb927.11.2920	Tb927.11.2920		glycerolphosphate mutase, putative	33.71	5.5	0	3.5933	1	1	1.04937	0.0209306	0.258743	0.587132		5.5	2	2	0.932836	-0.0301948	6.3316	2	5.5	2	2	1.0769	0.0321754	12.122	3	5.5	2	2	1.1503	0.0608111	6.3636	3
	764	Tb927.11.13120	Tb927.11.13120		hypothetical protein, conserved	35.058	4.8	0	6.8003	1		1.15839	0.0638537	0.258855	0.586944		4.8	1	1	0.794155	-0.100095	NaN	1	4.8	1	1	1.3854	0.141575	NaN	1	4.8	1	1	1.4128	0.150081	NaN	1
	525	Tb927.10.4120;Tb927.10.4110	Tb927.10.4120;Tb927.10.4110	RPL30	60S ribosomal protein L30 (RPL30) ;60S ribosomal protein L30 (RPL30)	11.512	80	0	176.1	2		1.06486	0.0272941	0.259213	0.586344		80	11	11	0.905961	-0.0428904	21.549	32	80	11	11	1.1477	0.0598284	12.106	24	80	11	11	1.1613	0.0649444	12.361	26
	1235	Tb927.3.2470	Tb927.3.2470	PUF8	pumilio RNA binding protein, putative (PUF8)	69.055	4.3	0	7.3196	1		1.02768	0.0118598	0.259418	0.585999		2.2	1	1	1.08614	0.0358866	NaN	1	2.2	1	1	0.96271	-0.0165045	NaN	1	4.3	2	2	1.038	0.0161974	NaN	1
	271	Tb927.1.4310	Tb927.1.4310		hypothetical protein, conserved	183.76	6.5	0	22.48	1		1.07333	0.0307318	0.259538	0.585799		6	10	10	1.17777	0.0710616	18.075	10	6.5	12	12	0.89434	-0.0484973	20.728	10	5.4	9	9	1.1739	0.0696311	17.965	11
	99	Tb927.10.4430;Tb10.v4.0033;Tb11.v5.0767	Tb927.10.4430;Tb10.v4.0033;Tb11.v5.0767	PUF1	pumillo RNA binding protein PUF1 (PUF1) ;pumillo RNA binding protein PUF1,chrX additional, unordered contigs (PUF1) ;pumillo RNA binding protein PUF1, putative	63.851	12.6	0	130.44	3		1.04866	0.0206336	0.259572	0.585742		10.8	4	4	0.974374	-0.0112743	18.177	6	10.8	4	4	0.99934	-0.000286729	16.55	5	12.6	5	5	1.1843	0.0734617	18.368	6
	1122	Tb927.2.1120;Tb11.0820;Tb11.v5.0295	Tb927.2.1120;Tb11.0820;Tb11.v5.0295		retrotransposon hot spot protein (RHS, pseudogene), putative,retrotransposon hot spot protein 4 (RHS4), point mutation ;retrotransposon hot spot protein (RHS, pseudogene), putative,retrotransposon hot spot protein 4 (RHS4, pseudogene), putative,chrXI addit	80.856	19.1	0	65.87	3		1.03938	0.0167747	0.260009	0.585011		18.7	13	1	1.01119	0.00483445	6.278	3	17.4	14	1	1.1451	0.0588434	16.176	3	19.1	15	1	0.96972	-0.0133536	10.562	2
	1553	Tb927.6.1750	Tb927.6.1750		hypothetical protein, conserved	76.828	4.9	0	81.749	1		1.11669	0.0479322	0.26014	0.584794		4.9	2	2	0.918695	-0.0368284	4.2364	3	4.9	2	2	1.4746	0.168674	12.658	2	4.9	2	2	1.0279	0.0119509	10.577	2
	1400	Tb927.4.4570	Tb927.4.4570		hypothetical protein, conserved	98.496	1.3	0.0015015	2.924	1		0.939061	-0.0273063	0.260288	0.584546		1.3	1	1	0.887863	-0.0516541	44.787	2	1.3	1	1	0.84605	-0.072604	NaN	1	1.3	1	1	1.1024	0.0423392	NaN	1
	1389	Tb927.4.410	Tb927.4.410	CAF40	CAF 40 (CAF40)	35.32	26.6	0	108.8	1		1.06766	0.0284335	0.260835	0.583633		26.3	7	7	0.906208	-0.0427723	14.711	12	26.6	8	8	1.1147	0.047158	13.614	15	26.3	7	7	1.2048	0.080915	8.4435	14
	1311	Tb927.3.620	Tb927.3.620		ATP-dependent DEAD/H RNA helicase, putative	90.439	1.1	0.001991	2.8735	1		1.08899	0.0370248	0.260865	0.583585		1.1	1	1	1.00616	0.00266605	14.047	2	1.1	1	1	0.94719	-0.0235629	NaN	1	1.1	1	1	1.3551	0.131971	5.3129	2
	1175	Tb927.2.4980	Tb927.2.4980		hypothetical protein, conserved	29.837	35.8	0	26.249	1		1.02759	0.0118212	0.261421	0.58266		35.8	8	8	0.967961	-0.0141424	20.863	10	32.6	7	7	1.0244	0.0104696	18.655	8	32.6	7	7	1.0943	0.0391364	15.713	8
	905	Tb927.11.2620	Tb927.11.2620		hypothetical protein, conserved	68.718	6.6	0	17.703	1		1.07517	0.031479	0.261765	0.582088		6.6	3	3	1.11259	0.0463369	12.811	4	3.4	2	2	1.2417	0.0940167	28.998	3	6.6	3	3	0.89967	-0.0459168	10.094	3
	1183	Tb927.2.5240	Tb927.2.5240	TbPRP19	PRP19-like protein, putative (TbPRP19)	54.268	3.9	0	51.479	1		1.04872	0.0206601	0.261934	0.581809		3.9	1	1	0.926269	-0.0332629	NaN	1	3.9	1	1	1.1205	0.0494119	NaN	1	3.9	1	1	1.1113	0.0458313	NaN	1
	2091	Tb927.9.14480	Tb927.9.14480		dynein-associated protein, putative	11.13	34.7	0	12.42	1		1.04352	0.0184998	0.262081	0.581565		34.7	2	2	1.09706	0.040229	8.5279	3	34.7	2	2	0.93373	-0.0297787	26.369	2	34.7	2	2	1.1093	0.045049	1.0454	2
	1137	Tb927.2.280;Tb11.v5.0594;Tb927.4.210;Tb927.10.110	Tb927.2.280;Tb11.v5.0594		retrotransposon hot spot protein 2 (RHS2), putative ;retrotransposon hot spot (RHS) protein, putative	90.22	21.3	0	122.33	4		1.04966	0.0210488	0.262095	0.581542		19.1	14	2	0.927214	-0.0328201	31.93	4	17.9	15	2	1.1421	0.0577041	15.641	3	17.7	13	2	1.0921	0.0382624	8.5749	3
	1516	Tb927.5.4270	Tb927.5.4270		ATP-dependent DEAD/H RNA helicase, putative	93.954	5.2	0	10.306	1		1.06662	0.02801	0.262126	0.58149		5.2	3	3	0.909918	-0.0409977	23.295	3	4.1	2	2	1.0997	0.0412742	19.16	2	4.1	2	2	1.2127	0.0837534	10.688	2
	1640	Tb927.9.15190;Tb927.6.5040	Tb927.9.15190;Tb927.6.5040		ribosomal protein L15, putative ;ribosomal protein L15, putative	24.401	23.5	0	28.3	2		1.06007	0.0253359	0.262266	0.581258		23.5	6	6	0.910001	-0.0409582	14.07	30	23.5	6	6	1.1449	0.0587676	17.207	27	23.5	6	6	1.1434	0.0581982	17.336	32
	981	Tb927.11.4900	Tb927.11.4900		guanine nucleotide-binding beta subunit-like protein,G-protein (beta)-like protein,beta transducin-like protein	61.857	12.1	0	15.082	1		1.08111	0.0338699	0.262796	0.580381		12.1	5	5	0.891266	-0.0499929	20.46	7	12.1	5	5	1.1228	0.0503024	11.89	7	12.1	5	5	1.2627	0.1013	15.455	7
	889	Tb927.11.2250	Tb927.11.2250		hypothetical protein, conserved	26.94	19.1	0	41.336	1		1.07355	0.0308203	0.262921	0.580174		19.1	3	3	0.89214	-0.0495669	16.869	14	19.1	3	3	1.1558	0.0628827	20.281	12	19.1	3	3	1.1999	0.0791451	11.426	12
	218	Tb927.4.5300;Tb11.v5.0880;Tb927.4.5240;Tb927.4.5290;Tb927.4.5280;Tb927.4.5270;Tb927.4.5260;Tb927.4.5250	Tb927.4.5300;Tb11.v5.0880;Tb927.4.5240;Tb927.4.5290;Tb927.4.5280;Tb927.4.5270;Tb927.4.5260;Tb927.4.5250		UDP-Gal or UDP-GlcNAc-dependent glycosyltransferase, putative ;UDP-Gal or UDP-GlcNAc-dependent glycosyltransferase, putative ;UDP-Gal or UDP-GlcNAc-dependent glycosyltransferase, putative ;UDP-Gal or UDP-GlcNAc-dependent glycosyltransferase, putative ;UDP-	39.322	4.5	0.0096507	2.0029	8		1.32769	0.123097	0.263128	0.579833		4.5	1	1	0.975895	-0.0105967	NaN	1	0	0	0				0	4.5	1	1	1.8063	0.25679	NaN	1
	665	Tb927.10.9800	Tb927.10.9800		60S ribosomal protein L22	15.271	29.2	0	34.297	1		1.01911	0.00822008	0.263146	0.579804		21.5	3	1	0.970403	-0.013048	NaN	1	29.2	4	1	1.0364	0.0155274	NaN	1	21.5	3	1	1.0524	0.0221808	NaN	1
	2137	Tb927.9.3990;Tb927.9.3920	Tb927.9.3990;Tb927.9.3920		ribosomal protein S7, putative ;ribosomal protein S7, putative	23.841	64.4	0	134.75	2		1.06426	0.0270459	0.263351	0.579465		64.4	16	16	0.904814	-0.0434409	13.502	19	58.9	14	14	1.1774	0.070924	15.997	24	60.9	16	16	1.1315	0.0536546	21.148	27
	2021	Tb927.9.10400	Tb927.9.10400		hypothetical protein, conserved	50.645	43.8	0	323.31	1		1.03526	0.0150481	0.263902	0.578557		43.8	16	16	0.945984	-0.0241161	49.994	117	43.8	16	16	1.0687	0.0288558	11.419	142	43.8	16	16	1.0975	0.0404045	14.305	175
	1470	Tb927.5.2570	Tb927.5.2570	EIF3B	translation initiation factor, putative (EIF3B)	79.81	34.8	0	91.592	1		1.06233	0.0262585	0.264196	0.578073		31.2	17	17	0.906372	-0.0426936	16.459	30	33.5	19	19	1.1315	0.0536546	19.488	36	33.5	19	19	1.169	0.0678145	13.106	28
	499	Tb927.10.3070	Tb927.10.3070		hypothetical protein, conserved	26.753	9.7	0	7.0669	1		0.955728	-0.0196659	0.264389	0.577757		9.7	1	1	0.909504	-0.0411952	20.687	2	0	0	0				0	9.7	1	1	1.0043	0.00186346	NaN	1
	2156	Tb927.9.5320	Tb927.9.5320		nucleolar RNA binding protein, putative	46.864	71	0	323.31	1		1.04988	0.0211381	0.264534	0.577518		69.3	29	28	0.923873	-0.0343878	15.235	63	71	33	32	1.1355	0.0551871	13.254	71	71	33	32	1.1031	0.0426149	19.233	81
	545	Tb927.10.5030;Tb927.7.3680	Tb927.10.5030;Tb927.7.3680		ubiquitin/ribosomal protein S27a, putative ;ubiquitin/ribosomal protein S27a, putative	16.705	27.2	0	47.268	2		1.05103	0.0216164	0.264677	0.577284		27.2	3	3	0.927472	-0.0326993	12.129	9	27.2	3	3	1.1604	0.0646077	22.823	10	27.2	3	3	1.0788	0.0329409	15.123	14
	189	Tb927.7.7070;Tb11.v5.0612	Tb927.7.7070;Tb11.v5.0612		hypothetical protein, conserved ;hypothetical protein, conserved	49.45	2	0.0043145	2.4386	2		1.16342	0.0657383	0.264882	0.576948		2	1	1	0.78734	-0.103838	NaN	1	2	1	1	1.303	0.114944	NaN	1	2	1	1	1.535	0.186108	NaN	1
	983	Tb927.11.4940	Tb927.11.4940		AAA ATPase, putative	56.849	3.4	0.001993	2.8847	1		1.07485	0.0313495	0.265285	0.576288		1.3	1	1	0.887311	-0.0519239	NaN	1	1.3	1	1	1.1935	0.0768224	NaN	1	3.4	2	2	1.1726	0.0691499	12.241	4
	1347	Tb927.4.1930	Tb927.4.1930	EIF3D	RNA-binding protein, putative (EIF3D)	31.293	46.7	0	82.688	1		1.06107	0.0257451	0.26531	0.576247		46.7	13	13	0.908183	-0.0418268	19.764	15	46.7	13	13	1.1216	0.049838	18.745	17	43	12	12	1.1728	0.069224	22.683	17
	935	Tb927.11.3480	Tb927.11.3480		hypothetical protein, conserved	78.606	3.1	0	7.5356	1		1.08423	0.0351217	0.265774	0.575488		3.1	1	1	0.887784	-0.0516926	NaN	1	3.1	1	1	1.117	0.0480532	NaN	1	3.1	1	1	1.2853	0.109005	NaN	1
	738	Tb927.11.12110	Tb927.11.12110		RNA helicase, putative	143.09	2.8	0	8.3554	1		1.04787	0.0203055	0.265907	0.575271		2.8	3	3	0.933445	-0.0299111	21.263	4	1.8	2	2	1.1563	0.0630705	21.956	3	1.8	2	2	1.066	0.0277572	17.764	2
	2024	Tb927.9.10530	Tb927.9.10530		hypothetical protein, conserved	118.72	3.9	0	33.732	1		1.07264	0.0304547	0.266699	0.573978		1.2	1	1	1.01343	0.00579286	NaN	1	3.1	2	2	1.2888	0.110186	18.456	2	0.9	1	1	0.9449	-0.0246142	NaN	1
	1589	Tb927.6.3020	Tb927.6.3020		hypothetical protein, conserved	32.217	4.9	0	6.604	1		1.33447	0.125308	0.266732	0.573924		0	0	0				0	4.9	1	1	0.96846	-0.0139183	NaN	1	4.9	1	1	1.8388	0.264534	NaN	1
	421	Tb927.10.14990	Tb927.10.14990	IFT80	intraflagellar transport protein IFT80/CHE2, putative (IFT80)	86.676	6.3	0	107.5	1		1.09049	0.0376225	0.266811	0.573797		5.1	3	3	0.86783	-0.0615656	7.2189	3	6.3	4	4	1.2686	0.103325	4.8905	3	5.1	3	3	1.1779	0.0711084	66.425	3
	946	Tb927.11.3850	Tb927.11.3850		AMP deaminase, putative	175.55	10.7	0	51.969	1		1.04139	0.0176119	0.266944	0.573579		8.2	12	12	1.04289	0.0182403	17.204	9	9.1	13	13	0.94702	-0.0236408	23.425	13	7.8	11	11	1.1435	0.0582362	20.436	10
	241	Tb927.1.190	Tb927.1.190		retrotransposon hot spot protein (RHS, pseudogene), putative	94.659	13.6	0	10.745	1		1.06107	0.0257458	0.268332	0.571328		12	9	3	0.914495	-0.0388188	19.05	4	13.6	10	3	1.085	0.0354297	17.537	3	12.3	9	3	1.204	0.0806265	23.014	4
	138	Tb927.10.5340;Tb927.10.5330;Tb11.v5.1060;Tb11.v5.0243;Tb927.5.1500;Tb11.v5.0852	Tb927.10.5340;Tb927.10.5330;Tb11.v5.1060;Tb11.v5.0243	RPS18	40S ribosomal protein S18, putative (RPS18) ;40S ribosomal protein S18, putative ;40S ribosomal protein S18, putative ;40S ribosomal protein S18, putative	17.51	66.7	0	154.26	6		1.05952	0.0251074	0.268355	0.57129		65.4	20	20	0.906208	-0.0427723	14.325	113	60.8	19	19	1.151	0.0610753	14.91	110	66.7	22	22	1.1403	0.0570191	11.46	123
	1805	Tb927.7.6980	Tb927.7.6980		hypothetical protein, conserved	194.95	8.9	0	25.993	1		1.07724	0.0323128	0.268433	0.571164		5.6	8	8	0.910249	-0.0408396	31.287	7	6.9	10	10	1.2894	0.110388	28.487	9	6.4	10	10	1.0651	0.0273904	21.747	8
	1550	Tb927.6.1620	Tb927.6.1620		hypothetical protein, conserved	28.673	9	0	3.2852	1		1.0955	0.0396133	0.268636	0.570836		3	1	1	0.884799	-0.0531553	NaN	1	3	1	1	1.0946	0.0392554	NaN	1	9	2	2	1.3575	0.13274	NaN	1
	1145	Tb927.2.3370	Tb927.2.3370		UDP-Gal or UDP-GlcNAc-dependent glycosyltransferase, putative	43.687	3.4	0	3.6642	1		0.857415	-0.066809	0.269042	0.570179		3.4	1	1	0.81248	-0.0901875	NaN	1	3.4	1	1	0.61529	-0.21092	NaN	1	3.4	1	1	1.2609	0.100681	NaN	1
	791	Tb927.11.14020;Tb927.11.14000	Tb927.11.14020;Tb927.11.14000	NRBD2	RNA-binding protein (NRBD2) ;NRBD1 (NRBD1)	30.274	42.3	0	143.33	2		1.0624	0.0262862	0.269357	0.569672		42.3	14	14	0.90465	-0.0435195	9.8846	23	42.3	16	16	1.1874	0.074597	11.278	23	42.3	14	14	1.1163	0.0477809	10.137	23
	412	Tb927.10.14790	Tb927.10.14790		aminopeptidase, putative,metallo-peptidase, Clan MG, Family M24	42.69	25.7	0	42.751	1		1.07801	0.0326246	0.269466	0.569495		25.7	9	9	0.878889	-0.0560659	8.6913	9	23.8	8	8	1.1836	0.073205	9.1538	8	25.7	9	9	1.2043	0.0807347	14.558	10
	574	Tb927.10.6070	Tb927.10.6070		universal minicircle sequence binding protein (UMSBP), putative,predicted zinc finger protein	14.566	56.4	0	80.223	1		1.05871	0.0247775	0.269638	0.569219		56.4	6	5	0.906865	-0.0424574	16.852	16	56.4	6	5	1.1577	0.063596	12.812	17	56.4	6	5	1.1303	0.0531937	18.91	13
	840	Tb927.11.16040	Tb927.11.16040		hypothetical protein, conserved	45.436	2.9	0.0056577	2.2991	1		1.22126	0.0868074	0.269684	0.569145		2.9	1	1	0.725953	-0.139092	NaN	1	2.9	1	1	1.822	0.260548	NaN	1	2.9	1	1	1.3771	0.138965	NaN	1
	222	Tb927.4.3080;Tb11.v5.0963	Tb927.4.3080;Tb11.v5.0963		hypothetical protein, conserved ;hypothetical protein, conserved	18.44	27.9	0	15.098	2	1	1.05402	0.0228503	0.269858	0.568864		17	2	2	0.93006	-0.0314893	4.7862	2	27.9	3	3	1.0558	0.0235817	26.776	3	6.1	1	1	1.1925	0.0764584	NaN	1
	555	Tb927.10.5480;Tb927.10.5460	Tb927.10.5480;Tb927.10.5460		60S ribosomal protein L24, putative ;60S ribosomal protein L24, putative	14.595	38.4	0	42.346	2		1.05549	0.0234545	0.269966	0.568692		38.4	5	5	0.911079	-0.0404441	25.393	10	38.4	5	5	1.1448	0.0587296	17.129	18	38.4	5	5	1.1274	0.052078	26.862	15
	322	Tb927.10.11600	Tb927.10.11600		hypothetical protein, conserved	66.002	5.2	0	4.3802	1		1.09429	0.0391305	0.270176	0.568353		3	2	2	0.891583	-0.049838	23.827	3	5.2	3	3	1.3645	0.134974	50.034	2	3	2	2	1.0771	0.032256	8.2521	2
	512	Tb927.10.3520	Tb927.10.3520	RPT4	protease regulatory ATPase subunit 4 (RPT4)	44.855	6.8	0	4.8497	1		1.11326	0.0465981	0.270402	0.56799		6.8	2	1	0.834446	-0.0786018	NaN	1	6.8	2	1	1.349	0.130012	NaN	1	6.8	2	1	1.2257	0.0883842	NaN	1
	627	Tb927.10.810	Tb927.10.810		hypothetical protein, conserved	67.488	17.1	0	98.593	1		1.04235	0.0180131	0.270429	0.567947		17.1	8	8	0.930839	-0.0311256	26.37	7	17.1	8	8	1.0946	0.0392554	14.552	7	17.1	8	8	1.1115	0.0459095	33.351	8
	596	Tb927.10.7190	Tb927.10.7190		D-tyrosyl-tRNA deacylase, putative	16.986	17.9	0	47.271	1		1.12925	0.0527892	0.270474	0.567874		17.9	2	2	0.900414	-0.0455577	25.785	3	11.9	1	1	1.5618	0.193625	28.756	2	11.9	1	1	1.024	0.0103	5.5333	2
	600	Tb927.10.7340;Tb927.10.7330	Tb927.10.7340;Tb927.10.7330		40S ribosomal protein S24E, putative ;40S ribosomal protein S24E, putative	15.683	35	0	68.643	2		1.07568	0.0316839	0.271038	0.56697		35	5	5	0.880514	-0.0552636	15.822	14	35	5	5	1.1827	0.0728746	16.092	12	35	5	5	1.1952	0.0774406	18.136	13
	701	Tb927.11.10910;Tb927.11.10790	Tb927.11.10910;Tb927.11.10790		40S ribosomal protein SA, putative ;40S ribosomal protein SA, putative	27.609	52	0	142.47	2		1.06084	0.0256512	0.271205	0.566702		52	11	11	0.90465	-0.0435195	15.841	21	39.3	10	10	1.1803	0.0719924	12.58	20	39.3	10	10	1.1181	0.0484806	12.895	26
	1937	Tb927.8.5120	Tb927.8.5120		cytochrome c	12.3	46.5	0	39.089	1		1.0145	0.00625118	0.271298	0.566553		41.2	5	5	1.04504	0.0191334	23.673	9	41.2	5	5	0.97714	-0.0100432	13.46	7	46.5	6	6	1.0225	0.00966332	18.24	7
	291	Tb927.10.10010	Tb927.10.10010		60S acidic ribosomal protein, putative	25.628	45.1	0	211.07	1		1.07543	0.0315841	0.27162	0.566038		45.1	10	10	0.887863	-0.0516541	8.7807	10	44.2	9	9	1.1254	0.0513069	16.253	10	45.1	10	10	1.2448	0.0950996	14.425	10
	1387	Tb927.4.3890	Tb927.4.3890		ATP-dependent RNA helicase, putative	122.8	12	0	112.56	1		1.05638	0.023821	0.271992	0.565444		11.2	8	8	0.921319	-0.0355898	19.018	8	7.9	6	6	1.1965	0.0779127	16.899	6	8.7	7	7	1.0694	0.0291402	19.507	7
	200	Tb927.10.2770;Tb11.v5.0684	Tb927.10.2770;Tb11.v5.0684		eukaryotic translation initiation factor 5, putative ;eukaryotic translation initiation factor 5, putative	42.945	3.7	0	6.3879	2		0.943277	-0.0253609	0.272144	0.565201		3.7	1	1	0.803084	-0.0952391	NaN	1	3.7	1	1	1.0122	0.00526633	NaN	1	3.7	1	1	1.0325	0.0138901	30.932	2
	1753	Tb927.7.4250;Tb927.7.4240	Tb927.7.4250;Tb927.7.4240		hypothetical protein, conserved ;hypothetical protein, conserved	12.486	36.6	0	85.639	2		1.0623	0.0262489	0.272536	0.564575		36.6	4	4	0.898634	-0.0464171	9.5223	7	36.6	4	4	1.1546	0.0624316	19.369	4	36.6	4	4	1.1554	0.0627324	31.245	5
	439	Tb927.10.1560	Tb927.10.1560		hypothetical protein, conserved	91.596	14.6	0	59.907	1		1.02786	0.0119348	0.272928	0.563952		14.6	11	11	0.953016	-0.0208997	22.313	15	10	7	7	1.0584	0.0246498	27.979	14	10.2	8	8	1.0766	0.0320544	17.943	13
	2039	Tb927.9.11490;Tb927.9.11470	Tb927.9.11490;Tb927.9.11470	RPL27A	60S ribosomal protein L27a,60S ribosomal protein L28,60S ribosomal protein L29 (RPL27A) ;60S ribosomal protein L27a,60S ribosomal protein L28,60S ribosomal protein L29	16.266	53.8	0	36.796	2		1.02728	0.0116875	0.273995	0.562257		53.8	8	8	0.957854	-0.0187005	27.119	30	46.9	7	7	1.039	0.0166155	31.444	21	46.2	6	6	1.0893	0.0371475	35.695	27
	993	Tb927.11.5250	Tb927.11.5250		hypothetical protein, conserved	177.31	21.1	0	102.15	1		1.04022	0.0171255	0.274738	0.561082		17.2	25	25	0.939938	-0.0269008	17.589	41	21.1	30	30	1.0534	0.0225933	11.738	41	21.1	31	31	1.1368	0.0556841	17.546	50
	1759	Tb927.7.4710	Tb927.7.4710		hypothetical protein, conserved	33.994	3.7	0	4.2028	1	1	1.11418	0.0469536	0.27485	0.560904		3.7	1	1	1.34133	0.127535	NaN	1	3.7	1	1	1.2498	0.0968405	NaN	1	3.7	1	1	0.82506	-0.0835145	NaN	1
	1638	Tb927.6.4950	Tb927.6.4950		mago nashi-like protein, putative	17.146	42.2	0	19.398	1		1.05613	0.0237185	0.274939	0.560763		42.2	5	5	0.910167	-0.0408791	9.4538	5	42.2	5	5	1.1745	0.069853	11.975	5	42.2	5	5	1.102	0.0421816	6.8804	5
	405	Tb927.11.4820;Tb927.10.14580	Tb927.11.4820;Tb927.10.14580		60S ribosomal protein L17, putative ;60S ribosomal protein L17, putative	19.105	34.9	0	36.431	2		1.06069	0.0255873	0.275087	0.56053		34.9	6	6	0.899281	-0.0461048	16.81	21	34.9	6	6	1.1628	0.065505	17.95	27	28.9	5	5	1.1412	0.0573618	14.038	15
	1878	Tb927.8.2600	Tb927.8.2600		hypothetical protein, conserved	73.024	8.8	0	18.017	1		1.01804	0.00776418	0.275365	0.560092		8.8	4	4	1.02437	0.0104567	7.2815	3	8.8	4	4	1.0597	0.0251829	10.304	3	8.8	4	4	0.97197	-0.0123471	10.317	3
	705	Tb927.11.10860	Tb927.11.10860		hypothetical protein, conserved	47.301	37.5	0	84.869	1		1.06288	0.0264824	0.276298	0.558622		37.3	13	13	0.896138	-0.0476253	17.169	16	32.2	13	13	1.1333	0.0543449	26.286	16	32.2	12	12	1.1823	0.0727277	16.375	12
	493	Tb927.3.1370;Tb927.10.2840	Tb927.3.1370;Tb927.10.2840		40S ribosomal protein S25, putative ;ribosomal protein S25, putative	12.56	35.4	0	24.386	2		1.07265	0.0304582	0.27639	0.558478		35.4	7	7	0.87974	-0.0556459	13.118	24	35.4	6	6	1.1909	0.0758753	9.3394	26	35.4	7	7	1.178	0.0711453	14.741	27
	985	Tb927.11.5020	Tb927.11.5020		hypothetical protein, conserved	186.51	11.4	0	129.75	1		1.0711	0.0298314	0.276674	0.558031		10.8	14	14	0.886132	-0.0525016	34.333	16	9.4	12	12	1.2232	0.0874975	10.988	10	10.4	13	13	1.1337	0.0544981	24.344	11
	1821	Tb927.7.880	Tb927.7.880	RPB25	RNA-binding protein, putative (RPB25)	29.808	39.4	0	106.57	1		1.06194	0.0261015	0.277099	0.557366		39.4	11	11	0.897908	-0.0467682	12.666	22	36.8	10	10	1.1865	0.0742677	14.707	27	39.4	11	11	1.1241	0.0508049	25.545	36
	820	Tb927.11.15180	Tb927.11.15180		hypothetical protein, conserved	12.897	18	0	3.1781	1		1.1003	0.0415106	0.277207	0.557195		18	1	1	0.846382	-0.0724337	NaN	1	18	1	1	1.3331	0.124863	NaN	1	18	1	1	1.1806	0.0721028	NaN	1
	1618	Tb927.6.4140	Tb927.6.4140	PFC4	paraflagellar rod component, putative (PFC4)	13.009	19.1	0	4.5388	1		0.901126	-0.0452142	0.27748	0.556768		19.1	2	2	1.04551	0.0193286	9.7984	2	19.1	2	2	1.0445	0.0189084	0.49554	2	19.1	2	2	0.67007	-0.17388	14.849	2
	1680	Tb927.7.2160	Tb927.7.2160		hypothetical protein, conserved	37.233	22	0	15.606	1		1.11426	0.0469865	0.27754	0.556674		18.8	4	4	1.38831	0.142487	21.621	9	22	5	5	0.8282	-0.0818648	16.783	7	22	5	5	1.2032	0.0803378	9.1733	8
	2153	Tb927.9.5100	Tb927.9.5100	PDEB2	cAMP-specific phosphodiesterase (PDEB2)	103.22	12.8	0	7.9497	1		0.954694	-0.0201359	0.277786	0.556289		12.8	10	1	0.95813	-0.0185757	NaN	1	10.9	8	1	0.84995	-0.0706066	NaN	1	9.1	6	1	1.0685	0.0287745	7.9826	2
	1992	Tb927.8.7100	Tb927.8.7100		acetyl-CoA carboxylase	242.91	9.2	0	164.5	1		1.10349	0.0427694	0.277917	0.556085		8.8	15	15	0.844595	-0.0733517	20.549	17	6.6	12	12	1.3591	0.133251	36.535	13	6.8	12	12	1.1706	0.0684085	21.87	14
	638	Tb927.10.8430	Tb927.10.8430		40S ribosomal protein S12, putative	16.061	73.9	0	124.72	1		1.06382	0.0268698	0.27856	0.555081		73.9	10	10	0.893096	-0.0491017	12.94	13	73.9	10	10	1.1894	0.0753279	9.8107	11	69	9	9	1.1334	0.0543832	12.228	12
	1405	Tb927.4.470	Tb927.4.470		snoRNP protein GAR1, putative	21.783	41	0	193.58	1		1.04839	0.0205223	0.279381	0.553803		40.2	7	7	0.917431	-0.0374265	16.09	31	40.2	6	6	1.1461	0.0592225	24.639	36	41	8	8	1.0959	0.0397709	11.373	39
	447	Tb927.9.15210;Tb927.10.1590	Tb927.9.15210;Tb927.10.1590		ribosomal protein L36, putative ;ribosomal protein L36, putative	12.457	34.9	0	11.091	2		1.04083	0.0173793	0.280437	0.552165		34.9	4	4	0.935891	-0.0287745	17.374	19	34.9	4	4	1.1422	0.0577422	11.061	16	34.9	4	4	1.0548	0.0231701	113.97	14
	410	Tb927.10.14750;Tb927.10.14630	Tb927.10.14750;Tb927.10.14630		fibrillarin, putative ;fibrillarin, putative	31.672	51	0	323.31	2		1.04393	0.0186697	0.281193	0.550995		51	22	22	0.922169	-0.0351895	60.975	39	51	21	21	1.1252	0.0512297	18.205	44	51	21	21	1.0964	0.039969	22.991	51
	2049	Tb927.9.12070	Tb927.9.12070		hypothetical protein, conserved	109.87	16.2	0	140.92	1		1.0419	0.0178268	0.281263	0.550888		14.7	10	10	0.92584	-0.033464	25.932	11	14.2	10	10	1.1217	0.0498767	18.151	10	14.2	10	10	1.0891	0.0370678	14.865	7
	1673	Tb927.7.1670	Tb927.7.1670		hypothetical protein, conserved	20.864	45.7	0	20.201	1		1.0432	0.0183678	0.282254	0.549359		45.7	6	6	0.92885	-0.0320544	11.026	7	29.6	4	4	1.147	0.0595634	19.436	5	30.6	4	4	1.0656	0.0275942	20.654	4
	967	Tb927.11.4450	Tb927.11.4450	ALBA2	ALBA-Domain Protein (ALBA2)	12.757	70.9	0	310.92	1		1.06572	0.0276451	0.283116	0.548035		70.9	14	14	0.891027	-0.050109	74.593	40	70.9	14	14	1.2213	0.0868224	15.238	41	70.9	14	14	1.1123	0.0462219	22.593	44
	509	Tb927.10.3380;Tb927.10.3370	Tb927.10.3380;Tb927.10.3370		60S acidic ribosomal protein P2, putative ;60S acidic ribosomal protein P2, putative	11.535	64	0	35	2		1.04623	0.0196278	0.283489	0.547463		64	5	5	0.926097	-0.0333433	15.742	12	63.2	4	4	1.1644	0.0661022	14.836	12	64	5	5	1.062	0.0261245	6.8377	9
	1474	Tb927.5.2670	Tb927.5.2670		hypothetical protein, conserved	14.491	13.4	0	12.901	1		1.10138	0.0419375	0.283784	0.547012		13.4	1	1	1.32361	0.12176	NaN	1	13.4	1	1	1.2129	0.083825	NaN	1	13.4	1	1	0.8322	-0.0797723	NaN	1
	865	Tb927.11.16760	Tb927.11.16760	TCP-1-alpha	T-complex protein 1, alpha subunit, putative (TCP-1-alpha)	54.623	30.5	0	74.411	1		1.09475	0.0393165	0.284406	0.546061		21.2	8	8	0.864827	-0.0630705	11.108	7	30.5	12	12	1.3752	0.138366	12.528	13	28.5	11	11	1.1032	0.0426543	16.368	12
	186	Tb927.10.4940;Tb11.v5.0596	Tb927.10.4940;Tb11.v5.0596	PK50	Nuclear Dbf2-related kinase (PK50) ;serine/threonine protein kinase, putative	50.146	5	0	3.9386	2		1.15771	0.0636006	0.284521	0.545886		1.8	1	1	0.761499	-0.118331	NaN	1	5	2	2	1.573	0.196729	27.016	2	1.8	1	1	1.2954	0.112404	NaN	1
	2109	Tb927.9.1610	Tb927.9.1610		CDP-diacylglycerol--inositol 3-phosphatidyltransferase, putative	24.11	5.1	0	12.701	1		1.04827	0.0204739	0.284622	0.545732		5.1	1	1	1.201	0.0795427	5.3951	2	5.1	1	1	0.95275	-0.021021	NaN	1	5.1	1	1	1.0067	0.00290007	NaN	1
	1908	Tb927.8.3750	Tb927.8.3750		nucleolar protein, putative	54.358	66.9	0	323.31	1		1.05559	0.0234971	0.285174	0.544891		64.8	29	28	0.904732	-0.0434802	35.629	49	62.7	29	28	1.1861	0.0741213	31.574	55	62.9	30	29	1.0961	0.0398502	16.086	68
	925	Tb927.2.6090;Tb927.11.3230	Tb927.2.6090;Tb927.11.3230	RPL44	60S ribosomal protein L44,ribosomal protein L36a.e (RPL44) ;60S ribosomal protein L44	12.454	40.6	0	21.656	2		1.05283	0.0223594	0.285716	0.544066		40.6	9	9	0.908926	-0.0414716	36.724	10	40.6	9	9	1.1774	0.070924	16.457	11	40.6	9	9	1.0905	0.0376257	11.309	11
	1262	Tb927.3.3590	Tb927.3.3590		U3 small nucleolar ribonucleoprotein protein MPP10, putative	75.271	12.6	0	25.219	1		1.02835	0.012143	0.286194	0.54334		12.6	6	6	0.957763	-0.0187421	34.045	7	11	5	5	1.0258	0.0110627	7.0748	5	10.6	5	5	1.1069	0.0441084	17.26	9
	1942	Tb927.8.5260	Tb927.8.5260		60S ribosomal protein L39, putative	6.5468	33.3	0	4.524	1		1.05772	0.0243688	0.28669	0.542588		19.6	1	1	0.895255	-0.0480532	11.644	7	33.3	2	2	1.1278	0.0522321	13.238	10	33.3	2	2	1.172	0.0689276	30.395	7
	732	Tb927.11.11830;Tb927.11.11820	Tb927.11.11830;Tb927.11.11820		40S ribosomal protein S17, putative ;40S ribosomal protein S17, putative	16.222	57	0	61.472	2		1.04891	0.0207393	0.286735	0.542519		57	10	10	0.909008	-0.0414322	11.432	19	57	10	10	1.1306	0.053309	17.645	20	57	10	10	1.1229	0.0503411	16.429	19
	883	Tb927.11.2100	Tb927.11.2100		hypothetical protein, conserved	69.994	45.3	0	235.91	1		1.04503	0.0191284	0.286882	0.542296		39	20	20	0.916926	-0.0376655	19.211	30	40.9	22	22	1.1345	0.0548045	24.224	35	42	22	22	1.0971	0.0402462	27.589	34
	2177	Tb927.9.6760	Tb927.9.6760		hypothetical protein, conserved	33.943	4.5	0	3.4039	1		0.920599	-0.0359294	0.287044	0.542052		4.5	1	1	0.729288	-0.137101	NaN	1	4.5	1	1	1.1149	0.0472359	NaN	1	4.5	1	1	0.95957	-0.0179233	NaN	1
	1302	Tb927.3.5430	Tb927.3.5430		hypothetical protein, conserved	31.212	14	0	18.475	1		1.05753	0.0242923	0.28787	0.540803		14	4	4	1.19153	0.0761035	43.28	6	14	4	4	0.89836	-0.0465496	21.65	6	14	4	4	1.1049	0.043323	28.84	6
	1948	Tb927.8.5520	Tb927.8.5520		hypothetical protein, conserved	19.535	44	0	173.41	1		1.06463	0.0271987	0.288234	0.540254		44	6	6	0.880902	-0.0550724	23.183	15	44	6	6	1.171	0.0685569	9.3987	9	44	6	6	1.1698	0.0681116	6.9566	9
	86	Tb927.5.4460;Tb05.5K5.110;Tb11.v5.0866	Tb927.5.4460;Tb05.5K5.110;Tb11.v5.0866	MVP	major vault protein, putative (MVP) ;major vault protein, putative,BAC from homologous region on chr5 ;major vault protein, putative	94.102	38.8	0	219.67	3		1.06413	0.0269948	0.288535	0.539802		36	20	20	0.888494	-0.0513455	21.115	25	34.5	20	20	1.2205	0.0865378	18.501	23	38.8	22	22	1.1112	0.0457922	25.623	29
	1264	Tb927.3.3630	Tb927.3.3630	EF-TS	elongation factor ts, putative (EF-TS)	29.732	8.8	0	44.907	1	1	1.16129	0.0649401	0.288623	0.53967		8.8	1	1	1.79375	0.253763	NaN	1	8.8	1	1	1.0442	0.0187837	NaN	1	8.8	1	1	0.83613	-0.0777262	NaN	1
	105	Tb927.10.6950;Tb927.10.6910;Tb11.v5.0496;Tb10.v4.0247	Tb927.10.6950;Tb927.10.6910;Tb11.v5.0496;Tb10.v4.0247		sterol 24-c-methyltransferase, putative ;Sterol methyltransferase, putative ;sterol 24-c-methyltransferase, putative ;s-adenosyl-L-methionine-c-24-delta-sterol-methy lt ransferase a, putative,chrX additional, unordered contigs	40.128	10.3	0	49.598	4		1.04171	0.0177481	0.288758	0.539466		10.3	3	3	0.936067	-0.0286932	7.4566	5	10.3	3	3	1.0408	0.0173673	13.438	3	6.4	2	2	1.1603	0.0645703	4.2216	2
	1829	Tb927.8.1190;Tb927.8.1170;Tb11.v5.0871	Tb927.8.1190;Tb927.8.1170;Tb11.v5.0871		hypothetical protein, conserved ;hypothetical protein, conserved ;hypothetical protein, conserved	36.419	29.3	0	110.95	3		1.0692	0.0290598	0.289881	0.53778		29.3	8	8	0.882613	-0.0542299	8.5341	11	29.3	8	8	1.2509	0.0972226	11.73	11	29.3	8	8	1.1071	0.0441869	3.868	13
	437	Tb927.10.15530;Tb11.v5.0748	Tb927.10.15530;Tb11.v5.0748		ABC transport system ATP-binding protein, putative ;ABC transporter, putative	67.522	36.4	0	97.091	2		1.07613	0.0318638	0.28999	0.537617		27.1	12	12	0.861995	-0.0644954	12.826	14	28.7	12	12	1.2363	0.0921239	50.175	12	33.7	16	16	1.1694	0.0679631	40.068	22
	2120	Tb927.9.2600	Tb927.9.2600		hypothetical protein, conserved	24.515	8.3	0.0052108	2.3479	1		0.79207	-0.101236	0.29003	0.537556		8.3	1	1	0.586441	-0.231775	NaN	1	8.3	1	1	1.0698	0.0293026	NaN	1	0	0	0				0
	1051	Tb927.11.7020	Tb927.11.7020	PSA4	proteasome alpha 7 subunit, putative (PSA4)	27.865	3.6	0.001006	2.9806	1		0.87083	-0.0600666	0.290407	0.536992		3.6	1	1	0.597229	-0.223859	NaN	1	3.6	1	1	1.2428	0.0944012	NaN	1	3.6	1	1	0.88973	-0.0507418	NaN	1
	588	Tb927.10.6800	Tb927.10.6800		developmentally regulated GTP-binding protein, putative	41.267	9.2	0	46.82	1		1.08253	0.0344402	0.29106	0.536017		7.3	2	2	0.850123	-0.0705181	5.6637	2	9.2	3	3	1.1879	0.0747799	9.9061	3	7.3	2	2	1.2562	0.0990588	5.9278	2
	2010	Tb927.8.890	Tb927.8.890		small GTP-binding protein Rab1, putative	22.714	74.5	0	126.95	1		1.03612	0.0154099	0.291159	0.53587		68.8	8	7	0.992753	-0.00315883	8.0288	8	68.8	8	7	0.97033	-0.0130805	9.6989	9	64.4	8	7	1.1547	0.0624692	14.352	9
	1964	Tb927.8.6030;Tb927.9.14000	Tb927.8.6030;Tb927.9.14000		60S ribosomal protein L12, putative ;60S ribosomal protein L12, putative	17.564	42.1	0	59.986	2		1.03663	0.0156243	0.291242	0.535746		34.8	4	4	0.92816	-0.032377	12.504	7	36	4	4	1.1019	0.0421422	8.7311	6	34.8	4	4	1.0892	0.0371076	11.629	8
	182	Tb11.v5.0562;Tb927.8.1260	Tb11.v5.0562;Tb927.8.1260		hypothetical protein, conserved ;hypothetical protein, conserved	93.651	5	0	8.8982	2		1.06797	0.0285575	0.291262	0.535716		5	3	3	0.961446	-0.0170751	14.503	3	2.3	1	1	0.96896	-0.0136942	1.772	2	2.3	1	1	1.3075	0.116442	2.37	2
	1662	Tb927.7.1050;Tb927.7.1040	Tb927.7.1050;Tb927.7.1040		40S ribosomal protein S16, putative ;40S ribosomal protein S16, putative	16.998	44.3	0	88.275	2		1.04065	0.0173046	0.291363	0.535565		44.3	13	13	0.925669	-0.0335444	40.194	27	43.6	11	11	1.1391	0.0565619	31.958	29	44.3	13	13	1.0688	0.0288964	17.612	24
	320	Tb927.9.6070;Tb927.10.11540	Tb927.9.6070;Tb927.10.11540	RPS3	40S ribosomal protein S3, putative (RPS3) ;40S ribosomal protein S3, putative (RPS3)	24.216	66.8	0	146.47	2		1.0573	0.0241997	0.292176	0.534355		63.6	17	17	0.897022	-0.047197	15.448	52	66.8	18	18	1.2008	0.0794707	12.295	50	66.8	18	18	1.0973	0.0403254	38.405	60
[truncated: 547 more rows]
