# Supplementary material for: Homologue replacement in the import motor of the mitochondrial inner membrane of trypanosomes
Source: eLife. 2020 Feb 27;9:e52560. doi: 10.7554/eLife.52560 (PMC7064343; doi:10.7554/eLife.52560)
Supplement: Figure 3—source data 2. [file elife-52560-fig3-data2.xlsx]

## Sheet: TbPam16-HA SILAC IPs
	Figure 3- Source Data 2: List of proteins identified in SILAC-AP-MS experiments of TbPam16-HA complexes
												Data determined across Replicates 1 - 3									Replicate 1								Replicate 2								Replicate 3
	Protein Group ID	Protein IDs	Majority Protein IDs	Gene Name	Protein Description	Mol. Weight [kDa]	Sequence Coverage [%]	Q-Value	Score	# of Proteins in Protein Group	Mitochondrial Proteome (acc. to Peikert et al., 2017)	Enrichment Factor	Mean log10 TbPam16-HA/Ctrl normalized	p-Value	-log10 p-Value	p-Value < 0.05	Sequence Coverage [%]	Peptides	Unique Peptides	Ratio TbPam16-HA/Ctrl	Ratio TbPam16-HA/Ctrl normalized	log10 Ratio TbPam16-HA/Ctrl normalized	Ratio Variability [%]	SILAC Peptide Pairs	Sequence Coverage [%]	Peptides	Unique Peptides	Ratio TbPam16-HA/Ctrl	Ratio TbPam16-HA/Ctrl normalized	log10 Ratio TbPam16-HA/Ctrl normalized	Ratio Variability [%]	SILAC Peptide Pairs	Sequence Coverage [%]	Peptides	Unique Peptides	Ratio TbPam16-HA/Ctrl	Ratio TbPam16-HA/Ctrl normalized	log10 Ratio TbPam16-HA/Ctrl normalized	Ratio Variability [%]	SILAC Peptide Pairs
	2044	Tb927.8.6310	Tb927.8.6310	TbPAM18	hypothetical protein, conserved	13.302	12.5	0	32.983	1	1	5.67752	0.754159	0.00368238	2.43387	+	12.5	1	1	4.86997	5.79274	0.762884	NaN	1	0	0	0	NaN	NaN		NaN	0	12.5	1	1	5.1966	5.5646	0.745434	NaN	1
	2165	Tb927.9.13530	Tb927.9.13530	TbPAM16	hypothetical protein, conserved	18.484	27.5	0	16.626	1	1	3.63859	0.560933	0.0134601	1.87095	+	21.6	3	3	3.85847	4.47267	0.650567	28.593	4	21	3	3	2.1071	2.3611	0.373114	59.916	2	21.6	3	3	4.1807	4.5616	0.659117	12.311	5
	1091	Tb927.11.8790	Tb927.11.8790		target SNARE, putative	35.541	4.7	0	7.9607	1		2.58025	0.411661	0.0363981	1.43892	+	0	0	0	NaN	NaN		NaN	0	4.7	1	1	2.0388	2.3141	0.364382	NaN	1	4.7	1	1	2.6918	2.877	0.45894	NaN	1
	1010	Tb927.11.570	Tb927.11.570		hypothetical protein, conserved	21.079	29.4	0	28.479	1	1	1.57608	0.197579	0.00550553	2.2592	+	12.3	2	2	1.40274	1.66714	0.221972	11.003	2	25.1	2	2	1.4372	1.6398	0.214791	17.955	3	4.3	1	1	1.3465	1.4321	0.155973	NaN	1
	881	Tb927.11.16710	Tb927.11.16710		hypothetical protein, conserved	13.612	12.7	0.0057906	1.889	1	1	1.50383	0.1772	0.0389054	1.40999	+	12.7	1	1	1.60529	1.91483	0.28213	NaN	1	12.7	1	1	1.1529	1.3172	0.119652	NaN	1	12.7	1	1	1.2159	1.3484	0.129819	NaN	1
	668	Tb927.10.9810	Tb927.10.9810		hypothetical protein, conserved	33.886	31.6	0	84.498	1	1	1.40178	0.146678	0.00723633	2.14048	+	31.6	8	8	1.16775	1.39803	0.145518	17.621	10	24.3	6	6	1.148	1.3073	0.116375	18.824	5	22.3	5	5	1.402	1.5071	0.178142	10.021	5
	1436	Tb927.4.4360;Tb927.8.8020	Tb927.4.4360;Tb927.8.8020		monoglyceride lipase, putative;monoglyceride lipase, putative	34.992	9.4	0	5.3001	2		1.39171	0.143549	0.0212447	1.67275	+	5.5	1	1	NaN	NaN		NaN	0	5.5	1	1	1.205	1.3613	0.133954	NaN	1	9.4	2	2	1.3234	1.4228	0.153144	9.4418	2
	674	Tb927.10.9900	Tb927.10.9900		ABC1 protein, putative	62.856	8.3	0	8.3062	1	1	1.3781	0.139281	0.0449655	1.34712	+	4.8	2	2	0.94402	1.13043	0.0532433	120.96	2	1.8	1	1	1.2776	1.4465	0.160318	NaN	1	6.6	3	3	1.4719	1.6006	0.204283	33.012	3
	1409	Tb927.4.3530	Tb927.4.3530		hypothetical protein, conserved	79.754	6.2	0	6.3145	1		1.37217	0.137406	0.029023	1.53726	+	4.8	3	3	1.35283	1.60449	0.205338	91.005	2	1.4	1	1	1.1541	1.3036	0.115144	NaN	1	2.1	1	1	1.1376	1.2352	0.0917373	NaN	1
	544	Tb927.10.470	Tb927.10.470		choline dehydrogenase, putative	56.921	44.4	0	114.88	1	1	1.37117	0.137091	0.00747385	2.12646	+	29.9	11	11	1.24213	1.46216	0.164995	28.441	16	37.1	12	12	1.1268	1.2778	0.106463	13.824	19	36	13	13	1.2859	1.3798	0.139816	16.678	17
	421	Tb927.10.1500	Tb927.10.1500	MetRS	methionyl-tRNA synthetase, putative (MetRS)	86.91	4.5	0	7.1	1	1	1.36727	0.135855	0.0243747	1.61306	+	2.8	2	2	1.16017	1.35126	0.130739	8.4598	2	4.5	3	3	1.0809	1.2152	0.0846478	100.28	3	3.2	2	2	1.4489	1.5566	0.192177	81.881	2
	1162	Tb927.2.3370	Tb927.2.3370		UDP-Gal or UDP-GlcNAc-dependent glycosyltransferase, putative	43.687	12.5	0	11.481	1		1.31627	0.119343	0.0125282	1.90211	+	8.8	2	2	1.02081	1.20495	0.080969	5.3568	2	8.5	2	2	1.2342	1.3846	0.141324	11.46	2	3.7	1	1	1.265	1.3669	0.135737	NaN	1
	654	Tb927.10.9080	Tb927.10.9080		pteridine transporter, putative	69.998	17	0	45.489	1	1	1.29082	0.110865	0.0122375	1.91231	+	10	4	4	1.01753	1.2097	0.0826784	19.872	5	9.7	4	4	1.23	1.3913	0.143421	16.275	3	15	7	7	1.186	1.2779	0.106497	96.663	8
	847	Tb927.11.15560	Tb927.11.15560	TbNup53a	Nucleoporin (TbNup53a)	52.786	7.4	0	10.787	1		1.2732	0.104896	0.00528474	2.27698	+	7.4	2	2	1.03011	1.21437	0.0843521	45.284	3	4.1	1	1	1.153	1.2853	0.109005	NaN	1	7.4	2	2	1.2147	1.3223	0.12133	37.272	3
	1863	Tb927.7.6460	Tb927.7.6460		FG-GAP repeat protein, putative,intergrin alpha chain protein, putative	92.145	5.6	0	9.5263	1		1.26646	0.102593	0.0285944	1.54372	+	0	0	0	NaN	NaN		NaN	0	3.1	1	1	1.1532	1.2937	0.111834	NaN	1	5.6	3	3	1.141	1.2398	0.0933516	14.728	3
	117	Tb11.0400;Tb927.11.7700;Tb11.0300	Tb11.0400;Tb927.11.7700;Tb11.0300	P27	P27 protein, putative (P27);hypothetical protein;hypothetical protein,chrXI additional, unordered contigs	27.701	39.8	0	46.581	3	1	1.24997	0.0969002	0.00606472	2.21719	+	39.8	9	9	1.06675	1.2847	0.108803	13.985	13	24.9	6	6	1.1299	1.2779	0.106497	19.758	8	34	9	9	1.0843	1.1896	0.075401	10.428	13
	1406	Tb927.4.3300	Tb927.4.3300		mitochondrial ATP-dependent zinc metallopeptidase, putative,metallo-peptidase, Clan MA(E) Family M41	78.872	12.7	0	20.332	1	1	1.23369	0.091207	0.0242995	1.6144	+	9.6	6	6	1.11111	1.32144	0.121047	17.747	7	4.5	3	3	1.1188	1.2635	0.101575	33.643	3	11.1	7	7	1.0431	1.1246	0.0509981	9.5101	7
	460	Tb927.10.2040	Tb927.10.2040		protein kinase, putative	93.874	15.5	0	19.469	1		1.22806	0.0892205	0.0373298	1.42794	+	8.8	5	5	0.95511	1.1457	0.0590705	25.79	5	5.7	3	3	1.2199	1.3825	0.140665	18.609	4	6.6	4	4	1.0476	1.1693	0.0679259	12.235	4
	1219	Tb927.3.1410	Tb927.3.1410	COXVII	cytochrome oxidase subunit VII (COXVII)	19.264	34.5	0	27.337	1	1	1.22434	0.0879022	0.00130488	2.88443	+	27.9	4	4	1.00966	1.20782	0.0820011	13.125	5	27.9	4	4	1.1071	1.2495	0.0967363	18.159	6	23.6	4	4	1.1358	1.2161	0.0849693	10.077	7
	2167	Tb927.9.13580	Tb927.9.13580		hypothetical protein, conserved	48.929	8.3	0	11.517	1	1	1.21494	0.0845538	0.0306602	1.51343	+	3.1	1	1	1.02867	1.23068	0.0901444	NaN	1	8.3	3	3	1.1738	1.3167	0.119487	24.564	3	8.3	3	3	1.0132	1.1067	0.0440299	22.385	3
	364	Tb927.10.12930	Tb927.10.12930		hypothetical protein, conserved	23.985	29.5	0	18.409	1	1	1.2034	0.0804092	0.0477689	1.32086	+	15	2	2	0.950029	1.12605	0.0515577	1.3174	2	19.3	2	2	1.2044	1.3614	0.133986	46.113	3	29.5	4	4	1.0639	1.1368	0.0556841	38.475	4
	1430	Tb927.4.4210	Tb927.4.4210		ATP-dependent zinc metallopeptidase, putative,metallo-peptidase, Clan MA(E) Family M41	96.221	23.7	0	114.36	1	1	1.20045	0.0793457	0.0160608	1.79423	+	9.9	7	7	0.992457	1.18065	0.0721219	8.7515	7	13.6	8	8	1.0113	1.1442	0.0585019	16.145	8	16.2	10	10	1.1767	1.2806	0.107413	9.926	12
	1753	Tb927.7.2640;Tb927.7.2650	Tb927.7.2640		hypothetical protein, conserved	50.853	8.4	0	9.5235	2		1.1966	0.0779496	0.0316118	1.50015	+	6.2	2	2	0.907853	1.08896	0.0370107	29.086	2	5.5	2	2	1.1117	1.2433	0.0945759	18.934	2	6.2	2	2	1.1633	1.2655	0.102262	19.811	2
	1918	Tb927.8.1740	Tb927.8.1740	TbTim62	hypothetical protein, conserved	62.143	35.3	0	96.213	1	1	1.1567	0.06322	0.012004	1.92067	+	25.4	8	8	1.01308	1.20322	0.0803468	12.256	9	28.1	8	8	0.98646	1.1112	0.0457922	26.714	9	25.7	10	10	1.0693	1.1575	0.063521	21.519	11
	1482	Tb927.5.1530	Tb927.5.1530		hypothetical protein, conserved	59.943	4.3	0	8.6649	1	1	1.1548	0.0625063	0.0381188	1.41886	+	4.3	2	2	1.04673	1.24408	0.0948466	6.7572	2	4.3	2	2	1.0319	1.1515	0.0612639	8.9886	2	4.3	2	2	0.98534	1.075	0.0314085	5.6032	2
	265	Tb927.1.4100	Tb927.1.4100	COXIV	cytochrome oxidase subunit IV (COXIV)	40.534	41.4	0	123.25	1	1	1.1536	0.062056	0.00123747	2.90747	+	33.4	8	8	0.985416	1.16348	0.0657593	20.504	11	33.4	8	8	1.0069	1.1374	0.0559132	7.1085	10	30	9	9	1.0722	1.1601	0.0644954	9.9112	12
	1264	Tb927.3.2900	Tb927.3.2900		eukaryotic initiation factor 2a, putative	46.824	4.3	0.0014521	2.7254	1		1.15112	0.06112	0.00666424	2.17625	+	4.3	1	1	0.962279	1.12619	0.0516117	NaN	1	4.3	1	1	1.0067	1.1394	0.0566762	NaN	1	4.3	1	1	1.0998	1.1887	0.0750723	NaN	1
	764	Tb927.11.13010	Tb927.11.13010		hypothetical protein	22.171	15.3	0	15.524	1		1.14814	0.0599951	0.00932934	2.03015	+	0	0	0	NaN	NaN		NaN	0	8.2	1	1	1.0164	1.1435	0.0582362	NaN	1	15.3	3	3	1.033	1.1528	0.061754	39.697	3
	751	Tb927.11.12290	Tb927.11.12290		hypothetical protein, conserved	53.709	5	0	4.6537	1		1.148	0.0599425	0.0211622	1.67444	+	0	0	0	NaN	NaN		NaN	0	2	1	1	1.0114	1.1375	0.0559514	NaN	1	3	1	1	1.0773	1.1586	0.0639335	13.538	2
	2222	Tb927.9.3080	Tb927.9.3080		hypothetical protein, conserved	47.331	20.3	0	31.297	1		1.14446	0.0586022	0.0465224	1.33234	+	12.9	4	4	0.875964	1.054	0.022839	11.618	4	3	1	1	1.0805	1.2269	0.0888092	2.9762	2	17.3	6	6	1.0731	1.1592	0.0641584	45.877	5
	185	Tb11.v5.0525;Tb927.10.2640	Tb11.v5.0525;Tb927.10.2640		hypothetical protein, conserved;intraflagellar transport protein IFT81, putative	48.7	7.5	0	4.8883	2		1.14015	0.0569618	0.0455483	1.34153	+	4.2	1	1	0.944465	1.11881	0.0487548	NaN	1	0	0	0	NaN	NaN		NaN	0	3.3	1	1	1.0703	1.1619	0.0651688	NaN	1
	1234	Tb927.3.1920	Tb927.3.1920	NOT5	NOT5 protein (NOT5)	66.856	17.5	0	49.345	1		1.13823	0.0562296	0.0238781	1.622	+	14.6	5	5	0.936242	1.10306	0.0425987	13.583	5	6.8	2	2	1.0593	1.207	0.0817073	52.137	2	9.8	5	5	1.0271	1.1076	0.0443829	11.218	4
	1342	Tb927.3.750	Tb927.3.750		hypothetical protein, conserved	37.79	21.9	0	37.768	1	1	1.13793	0.0561172	0.0221624	1.65438	+	15.9	4	4	0.982318	1.16788	0.0673993	59.361	4	14.1	4	4	0.95256	1.0757	0.0316912	15.128	4	14.4	4	4	1.0819	1.1729	0.069261	8.0482	4
	2124	Tb927.9.11220	Tb927.9.11220	TbTim42	hypothetical protein, conserved	41.551	31.5	0	102.89	1	1	1.12787	0.0522577	0.0171267	1.76633	+	27.2	7	7	0.993147	1.18058	0.0720962	10.883	10	29.5	8	8	0.97881	1.1043	0.0430871	13.927	11	27.2	7	7	1.0199	1.1005	0.04159	5.8528	8
	308	Tb927.10.10850	Tb927.10.10850	AGO1	argonaute-like protein (AGO1)	99.184	5.6	0	11.254	1		1.12229	0.0501041	0.0130223	1.88531	+	1.3	1	1	NaN	NaN		NaN	0	2.7	2	2	1.0019	1.1276	0.0521551	7.5016	2	3	2	2	1.0364	1.117	0.0480532	21.555	2
	2225	Tb927.9.3170	Tb927.9.3170	COXV	cytochrome oxidase subunit V (COXV)	22.229	33.7	0	34.639	1	1	1.11984	0.0491579	0.0113554	1.9448	+	25.5	4	4	0.965437	1.15535	0.0627128	6.8842	5	33.7	5	5	0.99183	1.1171	0.0480921	5.6192	6	19.4	3	3	1.0066	1.0881	0.0366688	3.645	4
	1848	Tb927.7.590	Tb927.7.590		hypothetical protein, conserved	51.692	26.3	0	65.377	1	1	1.1184	0.0485965	0.028987	1.5378	+	15.3	5	5	0.937032	1.09988	0.0413453	25.362	5	20.1	7	7	0.94928	1.0764	0.0319737	23.459	7	20.1	7	7	1.1085	1.1816	0.0724705	37.111	8
	561	Tb927.10.5400	Tb927.10.5400		hypothetical protein, conserved	63.396	6.6	0	9.3572	1		1.11562	0.0475146	0.0342695	1.46509	+	4.2	1	1	0.969086	1.16779	0.067364	NaN	1	4.2	1	1	0.94611	1.0537	0.022717	NaN	1	6.6	2	2	1.0251	1.1284	0.0524631	1.819	2
	958	Tb927.11.3860	Tb927.11.3860		hypothetical protein, conserved	50.409	18.6	0	25.603	1	1	1.11387	0.0468335	0.0454604	1.34237	+	9.5	3	3	0.877655	1.04135	0.0175976	29.308	3	14.4	5	5	1.0024	1.1334	0.0543832	7.2332	6	18.6	7	7	1.0785	1.1709	0.0685198	23.637	7
	888	Tb927.11.16870	Tb927.11.16870		NADH dehydrogenase subunit NI8M, putative	18.805	24.2	0	12.141	1	1	1.11372	0.0467768	0.0467346	1.33036	+	7.3	1	1	0.978186	1.17805	0.0711641	NaN	1	16.4	2	2	1.0025	1.1243	0.0508822	27.636	3	24.2	3	3	0.94582	1.043	0.0182843	25.253	3
	801	Tb927.11.1400	Tb927.11.1400		hypothetical protein, conserved	94.046	7.3	0	20.403	1	1	1.11251	0.0463045	0.0419598	1.37717	+	5.6	4	4	0.961631	1.13474	0.054896	8.329	4	2.5	2	2	1.036	1.1633	0.0656917	13.033	2	6.2	4	4	0.96877	1.0431	0.0183259	8.1977	4
	550	Tb927.10.4980	Tb927.10.4980	DSK2	ubiquitin-like protein DSK2, putative (DSK2)	32.186	15.2	0	18.849	1		1.11135	0.0458528	0.0225413	1.64702	+	15.2	3	3	0.933097	1.09667	0.0400768	37.425	2	15.2	3	3	1.0416	1.1627	0.0654677	6.4908	3	10.3	2	2	0.98852	1.0765	0.032014	4.9727	2
	1756	Tb927.7.2680	Tb927.7.2680	ZC3H22	zinc finger protein family member, putative (ZC3H22)	76.183	11	0	21.404	1		1.11103	0.0457252	0.0369524	1.43236	+	5.1	2	2	0.899685	1.05184	0.0219517	17.368	2	4.5	2	2	0.97945	1.1163	0.0477809	33.086	2	7.1	3	3	1.0736	1.168	0.0674428	25.073	5
	316	Tb927.10.11190	Tb927.10.11190		hypothetical protein, conserved	52.561	4.3	0.0049239	1.9367	1		1.10936	0.0450722	0.0262052	1.58161	+	0	0	0	NaN	NaN		NaN	0	2.3	1	1	0.99831	1.1189	0.0487913	NaN	1	2.1	1	1	1.0234	1.0999	0.0413532	NaN	1
	1045	Tb927.11.6570	Tb927.11.6570		hypothetical protein, conserved	67.604	13.1	0	75.507	1	1	1.10766	0.0444064	0.00729096	2.13722	+	7.6	3	3	0.959877	1.1351	0.0550341	31.114	3	7.6	3	3	0.97353	1.0895	0.0372272	12.186	5	11.7	5	5	1.0023	1.0989	0.0409582	9.0602	7
	320	Tb927.10.11310	Tb927.10.11310	IFT57/55	intraflagellar transport protein IFT55/IFT57, putative (IFT57/55)	46.366	13.6	0	4.6147	1		1.1053	0.0434786	0.0086276	2.06411	+	0	0	0	NaN	NaN		NaN	0	5.3	1	1	0.97979	1.1083	0.0446573	NaN	1	8.2	1	1	1.0379	1.1023	0.0422998	19.182	2
	2039	Tb927.8.6190	Tb927.8.6190		hypothetical protein, conserved	9.6682	24.1	0	3.8996	1	1	1.10402	0.0429784	0.0212069	1.67352	+	24.1	2	2	0.893895	1.05903	0.0249083	4.5895	2	24.1	2	2	1.0025	1.1336	0.0544598	3.0431	2	24.1	2	2	1.0407	1.1209	0.0495669	0.0046549	2
	105	Tb927.10.4310;Tb10.v4.0045	Tb927.10.4310;Tb10.v4.0045	PHB2	prohibitin 2, putative (PHB2);prohibitin, putative,chrX additional, unordered contigs	32.215	69.2	0	201.06	2	1	1.10253	0.0423904	0.0255609	1.59242	+	51.5	10	10	0.923361	1.08445	0.0352079	11.732	15	57.6	10	10	1.01	1.1537	0.0620929	15.68	13	60.3	14	14	0.99898	1.0712	0.0298706	8.572	20
	292	Tb927.10.10320	Tb927.10.10320		dynein light chain, putative,dynein Tctex1 family, putative	12.161	22	0.0014313	2.6018	1		1.09946	0.04118	0.031071	1.50764	+	13.8	1	1	0.951837	1.10972	0.0452126	NaN	1	0	0	0	NaN	NaN		NaN	0	22	2	2	1.0107	1.0893	0.0371475	3.5937	2
	1137	Tb927.11.9820	Tb927.11.9820		hypothetical protein, conserved	64.425	10.6	0	9.8856	1		1.09764	0.0404584	0.022806	1.64195	+	6.5	3	3	0.944198	1.13691	0.0557246	22.222	3	8.9	4	4	0.97104	1.0988	0.0409187	21.509	4	8.4	4	4	0.96988	1.0586	0.0247319	8.5365	5
	1868	Tb927.7.6850;Tb927.7.6830	Tb927.7.6850;Tb927.7.6830	TS	trans-sialidase (TbTS);trans-sialidase, putative	84.543	19.8	0	47.974	2		1.09667	0.0400779	0.0142622	1.84581	+	13.9	8	8	0.911577	1.06346	0.0267195	23.573	8	16	10	10	0.99017	1.1217	0.0498767	15.4	13	18	12	11	1.0283	1.1057	0.0436373	19.191	11
	872	Tb927.11.16420	Tb927.11.16420		hypothetical protein, conserved	33.387	31.6	0	28.209	1	1	1.09511	0.0394569	0.0262683	1.58057	+	14.8	2	2	0.923191	1.08708	0.0362595	2.1748	2	13.5	2	2	1.014	1.1406	0.0571334	6.0222	2	18.2	4	4	0.99506	1.0592	0.024978	15.838	4
	1054	Tb927.11.6870	Tb927.11.6870		14-3-3 protein	29.196	30.2	0	41.735	1		1.0887	0.0369063	0.0374715	1.4263	+	21.4	5	5	0.887942	1.06669	0.0280378	22.997	6	21.8	5	5	0.93503	1.0579	0.0244446	20.592	6	24.2	5	5	1.0679	1.1435	0.0582362	36.863	6
	2198	Tb927.9.15460	Tb927.9.15460		calcium motive p-type ATPase, putative	113.97	17.3	0	100.47	1		1.08611	0.0358734	0.0265759	1.57551	+	9.6	5	5	0.983187	1.12782	0.0522379	46.423	5	15.1	8	8	0.93074	1.0544	0.0230054	13.528	8	9.9	7	7	0.98877	1.0774	0.032377	17.466	9
	1151	Tb927.2.2130	Tb927.2.2130		small GTP-binding protein RAB6, putative	25.385	40.4	0	19.818	1		1.08528	0.0355399	0.00173921	2.75965	+	20.9	4	4	0.919794	1.0828	0.034549	75.087	4	23.5	5	5	0.95309	1.0777	0.0324979	14.235	6	31.3	6	6	1.0118	1.0954	0.0395727	29.413	6
	1764	Tb927.7.2960	Tb927.7.2960		hypothetical protein, conserved	51.602	25.2	0	43.804	1		1.08164	0.0340816	0.0477086	1.3214	+	14.9	6	6	0.902935	1.07614	0.0318676	36.009	6	19.1	6	6	0.91456	1.0366	0.0156112	14.298	6	19.3	6	6	1.0425	1.1344	0.0547662	15.146	5
	1557	Tb927.5.530	Tb927.5.530		hypothetical protein, conserved	71.4	15.1	0	31.75	1	1	1.081	0.0338238	0.0230541	1.63725	+	10.4	5	5	0.925412	1.10415	0.04303	39.41	5	9.4	4	4	0.92534	1.0445	0.0189084	14.492	4	9.1	4	4	1.0101	1.0953	0.0395331	19.478	4
	2213	Tb927.9.2450	Tb927.9.2450		electon transport protein SCO1/SCO2, putative	44.135	26.7	0	56.222	1	1	1.07805	0.0326373	0.0242669	1.61498	+	17.4	5	5	0.930406	1.1155	0.0474692	12.782	6	14.8	4	4	0.91954	1.0562	0.0237462	6.9108	4	26.7	7	7	0.97622	1.0634	0.0266967	3.1672	7
	2163	Tb927.9.1350	Tb927.9.1350		hypothetical protein, conserved	59.813	16	0	20.24	1		1.07626	0.0319182	0.0241866	1.61642	+	4.7	3	3	0.924044	1.10229	0.042297	34.434	3	6.9	3	3	0.92018	1.042	0.0178677	3.6088	3	8.6	3	3	1.0112	1.0854	0.0355898	25.042	4
	319	Tb927.10.11300	Tb927.10.11300	PFC16	paraflagellar rod component, putative (PFC16)	14.328	39.7	0	15.725	1		1.07447	0.0311956	0.0333526	1.47687	+	30.2	3	3	0.894614	1.03965	0.016888	2.0715	3	19.8	2	2	0.95263	1.0726	0.0304378	13.002	2	39.7	4	4	1.0447	1.1124	0.046261	7.6483	5
	210	Tb927.9.15380;Tb11.v5.0686	Tb927.9.15380;Tb11.v5.0686		NADH-ubiquinone oxidoreductase complex I subunit, putative;hypothetical protein, conserved	42.585	13.9	0	13.071	2	1	1.07325	0.0306997	0.0265855	1.57536	+	8.3	2	2	0.901226	1.07527	0.0315171	22.878	2	8.3	2	2	0.98418	1.1042	0.0430477	6.4347	2	9.4	3	3	0.96249	1.0412	0.0175342	16.914	3
	2242	Tb927.9.4500	Tb927.9.4500		heat shock protein, putative,HSP70-like protein	91.117	24.6	0	101.24	1		1.07088	0.0297393	0.00749157	2.12543	+	15	8	8	0.9176	1.08086	0.033769	8.472	9	17.1	9	9	0.94056	1.0529	0.0223871	11.769	12	22.8	15	15	0.99443	1.0791	0.0330617	11.564	17
	2229	Tb927.9.3400	Tb927.9.3400		endo-beta-N-acetylglucosaminidase, putative	115.9	12.4	0	21.72	1		1.07071	0.0296728	0.049091	1.309	+	4	3	3	0.901876	1.08215	0.0342859	36.894	4	1.1	1	1	NaN	NaN		NaN	0	12.4	8	8	0.96783	1.0594	0.02506	44.261	9
	1039	Tb927.11.6300	Tb927.11.6300		40S ribosomal protein S5, putative	21.386	26.3	0	31.946	1		1.06894	0.0289515	0.021308	1.67146	+	7.9	1	1	0.886132	1.05666	0.0239344	14.164	2	20.5	2	2	0.97662	1.0996	0.0412347	22.561	5	13.7	2	2	0.98203	1.0512	0.0216854	2.9693	3
	1355	Tb927.4.1070	Tb927.4.1070		50S ribosomal protein L13, putative	24.299	6.4	0	4.8324	1	1	1.06231	0.0262509	0.0334828	1.47518	+	6.4	1	1	0.903261	1.06969	0.0292579	10.385	2	6.4	1	1	0.96846	1.0886	0.0368683	NaN	1	6.4	1	1	0.9596	1.0295	0.0126264	NaN	1
	997	Tb927.11.5290	Tb927.11.5290	MCP9	mitochondrial carrier protein (MCP9)	29.883	17	0	12.961	1	1	1.06198	0.0261144	0.0352277	1.45312	+	11	3	3	0.856164	1.02923	0.0125124	1.9374	3	8.2	2	2	0.9678	1.0905	0.0376257	12.719	2	17	5	5	0.98479	1.0671	0.0282051	10.05	5
	1995	Tb927.8.4810	Tb927.8.4810	PHB1	prohibitin 1 (PHB1)	31.429	29.6	0	51.006	1	1	1.06136	0.025861	0.0242207	1.61581	+	17.3	6	6	0.911743	1.08986	0.0373703	10.298	7	26.7	8	8	0.92009	1.0418	0.0177844	22.757	9	24.2	7	7	0.97105	1.053	0.0224284	9.8886	7
	1923	Tb927.8.1880	Tb927.8.1880		hypothetical protein, conserved	22.189	12.6	0	6.8137	1	1	1.05991	0.025269	0.0485997	1.31337	+	12.6	2	2	0.853898	1.01924	0.00827774	36.384	2	12.6	2	2	0.96192	1.0831	0.0346686	1.3806	2	5.8	1	1	1.0114	1.0786	0.0328604	NaN	1
	98	Tb927.5.4520;Tb05.5K5.160	Tb927.5.4520;Tb05.5K5.160		hypothetical protein, conserved;hypothetical protein, conserved,BAC from homologous region on chr5	108.2	9	0	29.095	2		1.05352	0.022642	0.0230962	1.63646	+	3.9	3	3	0.870549	1.02938	0.0125753	5.1911	2	3	2	2	0.94655	1.0671	0.0282051	3.2525	2	5.5	4	4	0.98642	1.0645	0.0271457	8.9784	2
	1932	Tb927.8.2160	Tb927.8.2160	PGPA	multidrug resistance protein A,p-glycoprotein (PGPA)	174.68	37.9	0	323.31	1		1.05332	0.0225624	0.0430658	1.36587	+	28.5	34	34	0.854409	1.02001	0.00860571	21.964	47	29	33	33	0.94408	1.0651	0.0273904	9.4651	45	30.6	38	38	0.98916	1.0757	0.0316912	13.802	49
	1353	Tb927.3.970	Tb927.3.970		hypothetical protein, conserved	39.639	18.6	0	13.442	1	1	1.05252	0.0222296	0.014516	1.83815	+	11.9	3	3	0.882068	1.03411	0.0145646	16.872	3	13	3	3	0.93319	1.0642	0.0270233	20.036	5	14.1	4	4	0.99264	1.0595	0.025101	11.737	4
	1759	Tb927.7.2710	Tb927.7.2710		NADH-cytochrome b5 reductase, putative	31.885	40.8	0	61.332	1	1	1.05073	0.02149	0.0397176	1.40102	+	30.7	7	7	0.887075	1.05258	0.0222535	10.674	6	40.4	9	9	0.90585	1.0232	0.00996053	9.1883	11	26.5	8	8	0.99604	1.0771	0.032256	7.944	10
	1363	Tb927.4.1500	Tb927.4.1500	REH2	RNA editing associated helicase 2 (REH2)	241.82	7.7	0	75.662	1	1	1.04812	0.0204118	0.035048	1.45534	+	4	5	5	0.913826	1.07491	0.0313725	16.972	5	5.6	6	6	0.91332	1.0284	0.0121621	14.874	6	3.5	5	5	0.96173	1.0416	0.017701	19.315	6
	659	Tb927.10.9250	Tb927.10.9250		G-actin binding protein, putative,CAP/Srv2p, putative	29.333	5.9	0	4.377	1		1.04806	0.0203882	0.030471	1.51611	+	5.9	1	1	0.887075	1.04335	0.0184304	NaN	1	5.9	1	1	0.93459	1.0528	0.0223459	NaN	1	0	0	0	NaN	NaN		NaN	0
	1407	Tb927.4.3450	Tb927.4.3450		hypothetical protein, conserved	13.735	29.8	0	78.025	1	1	1.04604	0.0195488	0.0409383	1.38787	+	29.8	2	2	0.88433	1.05661	0.0239159	9.2626	3	29.8	2	2	0.90521	1.018	0.00774778	8.1307	3	29.8	2	2	0.98685	1.0641	0.0269824	6.8127	2
	917	Tb927.11.2500	Tb927.11.2500		carboxypeptidase, putative,metallo-peptidase, Clan MA(E) Family M32	57.683	41.2	0	135.05	1	1	1.04492	0.0190825	0.0442467	1.35412	+	27.4	11	11	0.897505	1.04587	0.0194785	23.715	11	30	12	12	0.9053	1.0194	0.00834463	20.271	15	31.2	13	13	0.99213	1.0701	0.0294244	33.16	13
	413	Tb927.10.14790	Tb927.10.14790		aminopeptidase, putative,metallo-peptidase, Clan MG, Family M24	42.69	24.6	0	28.883	1		1.03947	0.0168139	0.0188656	1.72433	+	19.6	6	6	0.863409	1.02351	0.0100921	28.061	6	20.4	5	5	0.9292	1.0479	0.0203198	45.81	7	15.7	4	4	0.98483	1.0472	0.0200296	10.839	4
	1608	Tb927.6.2230	Tb927.6.2230		RGG protein	86.64	24.5	0	66.363	1	1	1.03757	0.0160168	0.0372351	1.42905	+	15.7	9	9	0.855359	1.01996	0.00858357	10	10	14.8	9	9	0.92025	1.035	0.0149403	12.472	10	22.5	14	14	0.97428	1.0581	0.0245267	10.82	19
	1440	Tb927.4.4570	Tb927.4.4570		hypothetical protein, conserved	98.496	5.3	0	42.051	1		1.03751	0.0159933	0.0405766	1.39172	+	1.2	1	1	0.897183	1.01613	0.00694756	NaN	1	2.5	2	2	0.93601	1.0558	0.0235817	7.197	2	4	3	3	0.95867	1.041	0.0174507	11.12	3
	1936	Tb927.8.2300	Tb927.8.2300		hypothetical protein, conserved	25.468	21.7	0	11.015	1	1	1.03677	0.0156815	0.0357127	1.44718	+	21.7	3	3	0.855725	1.01583	0.00681975	20.924	3	15.8	2	2	0.9217	1.0478	0.0202784	21.75	2	21.7	3	3	0.94594	1.047	0.0199467	26.254	3
	2299	Tb927.9.7980	Tb927.9.7980		hypothetical protein, conserved	15.754	29.7	0	34.656	1		1.03436	0.0146729	0.0258871	1.58692	+	20.9	1	1	0.863782	1.02279	0.00978562	2.6884	2	20.9	1	1	0.92781	1.0505	0.0213961	NaN	1	29.7	2	2	0.96542	1.03	0.0128372	15.431	2
	1190	Tb927.2.4830	Tb927.2.4830		TFIIF-stimulated CTD phosphatase, putative	38.807	14.3	0	9.3009	1	1	1.03342	0.0142762	0.0237443	1.62444	+	14.3	4	4	0.882379	1.04463	0.0189608	13.117	5	11.6	3	3	0.90002	1.0188	0.00808894	6.3732	4	14.3	4	4	0.96693	1.037	0.0157788	3.7191	5
	1487	Tb927.5.1710	Tb927.5.1710		ribonucleoprotein p18, mitochondrial precursor, putative	21.226	34	0	280.08	1	1	1.032	0.0136801	0.00579157	2.2372	+	27.1	5	5	0.871384	1.03244	0.0138644	9.2359	10	34	6	6	0.89707	1.0257	0.0110204	5.5024	15	27.1	5	5	0.96798	1.0379	0.0161555	9.3332	10
	903	Tb927.11.1990	Tb927.11.1990	ArgRS	arginyl-tRNA synthetase, putative	78.432	15.2	0	19.342	1	1	1.03025	0.0129417	0.0091647	2.03788	+	3.8	2	2	0.890234	1.03019	0.0129194	8.5802	2	10.8	6	6	0.88712	1.023	0.00987563	19.169	7	8.1	5	5	0.97133	1.0376	0.01603	5.1465	5
	348	Tb927.10.12510	Tb927.10.12510		P-type H -ATPase, putative	100.63	26.6	0	10.255	1		1.02783	0.0119215	0.00372992	2.4283	+	22.4	19	2	0.852733	1.02816	0.0120611	8.8719	3	23.8	18	2	0.91098	1.0275	0.0117818	0.22804	5	19.9	16	0	NaN	NaN		NaN	0
	665	Tb927.10.9440	Tb927.10.9440	54 NDH2	NADH dehydrogenase (54 NDH2)	54.351	49.7	0	129.01	1		1.02614	0.011205	0.046648	1.33117	+	28.1	8	8	0.839701	1.01233	0.00532211	8.1869	10	38.7	12	12	0.9024	1.024	0.0103	13.179	15	28.3	10	10	0.96535	1.0423	0.0179927	13.267	10
	1499	Tb927.5.2100	Tb927.5.2100	RBP30	hypothetical protein, conserved	49.665	20.2	0	24.42	1	1	1.02599	0.011143	0.00848889	2.07115	+	12.3	4	4	0.857854	1.0203	0.00872959	9.3577	4	8.4	2	2	0.90671	1.0254	0.0108933	27.828	3	20.2	7	7	0.94691	1.0323	0.0138059	8.8911	7
	1661	Tb927.6.4180	Tb927.6.4180		hypothetical protein, conserved	16.327	10.7	0	5.62	1	1	1.0221	0.00949446	0.0271436	1.56633	+	10.7	1	1	0.885269	1.01979	0.00851245	NaN	1	10.7	1	1	0.88044	1.0141	0.00608078	NaN	1	10.7	2	2	0.95074	1.0325	0.0138901	6.1108	2
	735	Tb927.11.11680	Tb927.11.11680		2-oxoglutarate dehydrogenase E2 component, putative	41.143	41.3	0	140.68	1	1	1.02061	0.0088614	0.00107352	2.96919	+	38.6	15	15	0.86423	1.02004	0.00861891	9.3387	27	35.8	15	15	0.89755	1.0193	0.00830202	11.68	24	38.6	16	16	0.94444	1.0225	0.00966332	10.399	26
	1808	Tb927.7.4170	Tb927.7.4170		fatty acid elongase, putative	30.493	14	0	22.242	1		1.01959	0.00842458	0.0215552	1.66645	+	8.9	2	2	0.852733	1.01932	0.00830884	4.6078	3	10.7	2	2	0.90121	1.0124	0.00535214	0.30102	3	8.9	2	2	0.94735	1.0271	0.0116127	3.4318	3
	1736	Tb927.7.1910	Tb927.7.1910	GCVP	pyridoxal phosphate containing glycine decarboxylase, putative (GCVP)	106.29	30.9	0	190.4	1	1	1.01885	0.00811048	0.0105299	1.97758	+	18.1	12	12	0.854993	1.02317	0.00994992	13.248	15	24.1	16	16	0.90335	1.0198	0.00851501	9.268	19	24.3	16	16	0.94255	1.0136	0.0058666	10.665	20
	479	Tb927.10.2560	Tb927.10.2560	mMDH	mitochondrial malate dehydrogenase (mMDH)	33.188	79.9	0	323.31	1		1.01796	0.00772898	0.0201681	1.69534	+	75.8	15	15	0.847386	1.01051	0.00454019	4.8557	25	79.6	17	17	0.91171	1.0223	0.00957836	6.2274	33	75.2	14	14	0.94443	1.0211	0.00906828	3.5538	27
	1473	Tb927.5.1210	Tb927.5.1210		short-chain dehydrogenase, putative	33.876	54	0	140.29	1		1.01791	0.00771019	0.0305894	1.51443	+	49.8	12	12	0.847099	1.0139	0.00599555	9.039	14	48.2	12	12	0.91221	1.0273	0.0116973	12.054	20	48.6	13	13	0.93915	1.0126	0.00543792	6.3037	15
	1274	Tb927.3.3460	Tb927.3.3460		hypothetical protein, conserved	53.228	36	0	97.932	1	1	1.01386	0.00597696	0.046387	1.3336	+	29.4	14	14	0.84631	1.01124	0.00485209	11.619	18	34	14	14	0.89543	1.0228	0.00979072	14.178	20	27.5	13	13	0.93853	1.0076	0.00328816	9.5113	20
	1159	Tb927.2.3030	Tb927.2.3030		ATP-dependent Clp protease subunit, heat shock protein 78 (HSP78), putative	90.664	51.7	0	275.98	1		1.01269	0.00547645	0.0278589	1.55504	+	34.4	20	20	0.850195	1.0149	0.00642282	10.586	24	39.9	22	22	0.8978	1.0167	0.00719282	17.151	28	38.8	25	25	0.92614	1.0065	0.00281378	7.318	31
	1468	Tb927.5.1060	Tb927.5.1060		mitochondrial processing peptidase, beta subunit, putative,metallo-peptidase, Clan ME, Family M16	54.122	54	0	323.31	1	1	1.01097	0.0047388	0.0241833	1.61648	+	51.7	17	17	0.855432	1.01283	0.00553784	8.4131	31	43.6	14	14	0.89302	1.006	0.00259798	6.6763	23	48.7	16	16	0.93653	1.0141	0.00608078	6.3259	31
	1914	Tb927.8.1570	Tb927.8.1570		hypothetical protein, conserved	28.825	58.8	0	137.6	1		1.01081	0.00466973	0.0402763	1.39495	+	36.4	7	7	0.845237	1.00486	0.00210729	15.618	6	32	5	5	0.8982	1.0114	0.00492295	9.603	4	39.3	7	7	0.94571	1.0162	0.00697919	22.24	8
	2171	Tb927.9.1380	Tb927.9.1380		hypothetical protein, conserved	42.439	40.9	0	82.176	1	1	1.01018	0.00439758	0.0220691	1.65622	+	28	9	9	0.847529	1.01375	0.00592915	12.997	8	28.2	9	9	0.89612	1.0107	0.00462227	13.405	10	35.1	12	12	0.93325	1.0061	0.00264115	6.3829	12
	1680	Tb927.6.4670	Tb927.6.4670	TbMORN1	MORN repeat-containing protein (TbMORN1)	40.686	53.9	0	62.263	1		1.01007	0.00434998	0.0491507	1.30847	+	33.5	11	11	0.845237	1.00924	0.0039923	9.5521	13	33.8	9	9	0.89435	1.0164	0.00706466	12.465	11	48	18	18	0.93511	1.0046	0.00199317	10.546	19
	1282	Tb927.3.3580	Tb927.3.3580	LPG3	lipophosphoglycan biosynthetic protein, putative (LPG3)	87.766	33	0	304.27	1		1.00943	0.00407578	0.0431179	1.36534	+	25.7	20	20	0.835911	1.00661	0.00286253	9.9405	24	26.5	18	18	0.89316	1.0154	0.00663716	13.618	24	25.7	20	20	0.92323	1.0063	0.00272747	17.802	24
	2235	Tb927.9.3760	Tb927.9.3760	TbGLE2	poly(A) export protein, putative (TbGLE2)	38.351	79.7	0	279.61	1		0.999971	-1.26926e-05	0.500704	0.300419		65	17	17	0.820883	0.972857	-0.0119509	16.152	27	62.5	14	14	0.88784	1.0048	0.00207963	12.918	18	73.1	18	18	0.95012	1.0229	0.00983318	16.601	27
	1733	Tb927.7.1790	Tb927.7.1790		Adenine phosphoribosyltransferase, putative	25.624	78.7	0	87.445	1		0.975628	-0.0107156	0.755831	0.121575		63.9	9	9	0.82149	0.990001	-0.00436437	8.0331	10	78.7	11	11	0.90254	1.0173	0.00744904	16.02	19	38.3	7	7	0.83716	0.92208	-0.0352314	11.296	9
	448	Tb927.10.1730	Tb927.10.1730		hypothetical protein, conserved	39.265	78.2	0	280.05	1	1	1.0056	0.00242426	0.175938	0.75464		73.9	21	21	0.846095	1.00618	0.00267482	8.3637	28	66.7	18	18	0.88578	0.99728	-0.00118289	12.812	24	67.5	18	18	0.93195	1.0134	0.0057809	5.7908	26
	1721	Tb927.7.1340;Tb927.7.1320	Tb927.7.1340;Tb927.7.1320	HSP10;HSP10	10 kDa heat shock protein, putative (HSP10);10 kDa heat shock protein, putative (HSP10)	10.67	77	0	37.88	2		0.996325	-0.00159919	0.606509	0.217163		77	6	6	0.821086	0.983962	-0.00702189	2.625	6	77	6	6	0.87436	0.98504	-0.00654613	12.237	8	77	7	7	0.95231	1.0204	0.00877045	14.986	8
	1175	Tb927.2.4210	Tb927.2.4210	PEPCK	glycosomal phosphoenolpyruvate carboxykinase (PEPCK)	58.564	74.7	0	323.31	1		1.0009	0.000389373	0.423839	0.372799		65.1	30	30	0.835352	0.998702	-0.000564211	11.912	44	71.8	33	33	0.87482	0.99514	-0.00211582	7.2643	59	58.1	27	27	0.94178	1.0089	0.00384812	7.1707	46
	588	Tb927.10.6510;Tb927.10.6400	Tb927.10.6510;Tb927.10.6400	HSP60;HSP60	chaperonin HSP60, mitochondrial precursor (HSP60);chaperonin HSP60, mitochondrial precursor (HSP60)	59.503	74.7	0	323.31	2		0.998151	-0.000803704	0.588227	0.230455		66.5	36	36	0.846884	1.01203	0.00519467	30.838	109	73.5	38	38	0.87361	0.98723	-0.00558166	6.5324	159	67.8	37	37	0.92751	0.99535	-0.00202418	8.4053	112
	499	Tb927.10.3210	Tb927.10.3210		delta-1-pyrroline-5-carboxylate dehydrogenase, putative	62.036	74.5	0	323.31	1	1	0.99756	-0.00106107	0.959976	0.0177398		57.9	26	26	0.839913	0.999001	-0.000434077	9.1924	37	70.6	30	30	0.88737	0.99709	-0.00126564	9.6553	58	57.6	28	28	0.92739	0.99659	-0.00148347	5.0551	41
	1213	Tb927.3.1120	Tb927.3.1120	rtb2	GTP-binding nuclear protein rtb2, putative (rtb2)	24.406	72.4	0	157.95	1		1.03103	0.0132716	0.156269	0.806126		52.5	9	9	0.870474	1.04242	0.0180411	9.1165	9	44.7	9	9	0.86763	0.98678	-0.00577966	14.715	13	66.4	13	13	0.9841	1.0655	0.0275535	11.81	15
	1156	Tb927.2.2520;Tb927.2.2510	Tb927.2.2520;Tb927.2.2510	VDAC;VDAC_2	voltage-dependent anion-selective channel;voltage-dependent anion-selective channel	29.189	72.2	0	315.79	2	1	1.00779	0.00337198	0.296436	0.52807		72.2	16	16	0.842531	1.00479	0.0020766	6.7147	26	68.1	14	14	0.91502	1.0309	0.0132165	4.7749	24	69.3	15	15	0.92149	0.98815	-0.00517713	5.8777	24
	177	Tb927.1.2390;Tb927.1.2370;Tb927.1.2350;Tb927.1.2330;Tb11.v5.0469;Tb927.1.2410	Tb927.1.2390;Tb927.1.2370;Tb927.1.2350;Tb927.1.2330;Tb11.v5.0469;Tb927.1.2410		beta tubulin;beta tubulin;beta tubulin;beta tubulin;beta tubulin, putative;beta tubulin, pseudogene	49.704	71.7	0	323.31	6		1.00254	0.00109964	0.319485	0.495549		66.1	22	22	0.841184	1.00548	0.00237344	62.357	46	64.3	21	21	0.89653	1.0087	0.00376202	5.0025	43	71.7	25	25	0.92188	0.99349	-0.0028365	7.6586	52
	607	Tb927.10.7410	Tb927.10.7410		succinyl-CoA ligase [GDP-forming] beta-chain, putative	44.905	69.5	0	323.31	1	1	0.989627	-0.00452831	0.958414	0.0184469		57.8	20	20	0.824063	0.984543	-0.00676544	9.7256	36	67.5	23	23	0.88424	0.99548	-0.00196746	5.2648	68	61.1	23	23	0.91769	0.98889	-0.00485201	8.7595	34
	1007	Tb927.11.5520	Tb927.11.5520	TIM	triosephosphate isomerase (TIM)	26.819	69.2	0	156.25	1		1.00794	0.00343557	0.14438	0.840494		60	12	12	0.854044	1.01912	0.0082249	41.515	22	64.4	13	13	0.89611	1.0017	0.000737674	3.071	35	60	13	13	0.92731	1.0031	0.00134423	3.8371	21
	1313	Tb927.3.4850	Tb927.3.4850		enoyl-CoA hydratase, mitochondrial precursor, putative	28.605	68.2	0	274.44	1	1	0.999651	-0.000151382	0.526521	0.278585		65.2	17	17	0.846597	1.00894	0.00386491	6.4457	22	58.4	15	15	0.88067	0.99437	-0.00245199	10.113	21	67	18	18	0.92805	0.99571	-0.00186713	4.373	24
	1646	Tb927.6.3800;Tb927.6.3750;Tb927.6.3740	Tb927.6.3800;Tb927.6.3750;Tb927.6.3740		heat shock 70 kDa protein, mitochondrial precursor, putative;heat shock 70 kDa protein, mitochondrial precursor, putative;heat shock 70 kDa protein, mitochondrial precursor, putative	71.474	68.2	0	323.31	3	1	1.0132	0.00569474	0.178924	0.747332		61.8	40	39	0.86783	1.0351	0.0149823	9.7383	83	63	39	39	0.87759	0.99747	-0.00110016	9.2048	104	66.4	46	46	0.93162	1.0074	0.00320195	13.494	116
	1146	Tb927.2.1680;Tb927.2.1560	Tb927.2.1680;Tb927.2.1560		cyclophilin-type peptidyl-prolyl cis-trans isomerase, putative;cyclophilin-type peptidyl-prolyl cis-trans isomerase, putative	21.165	67.9	0	174.02	2	1	1.00521	0.00225661	0.429167	0.367374		54.1	7	7	0.807624	0.960615	-0.0174507	15.256	9	63.3	8	8	0.89467	1.0071	0.0030726	5.52	12	65.3	8	8	0.965	1.0499	0.0211479	6.9342	9
	2129	Tb927.9.11580	Tb927.9.11580	gim5A	Gim5A protein,glycosomal membrane protein (gim5A)	26.408	67.9	0	195.93	1		0.966322	-0.014878	0.711349	0.147917		44.9	10	3	0.897747	1.07209	0.03023	11.023	4	67.9	17	5	0.81848	0.91843	-0.0369539	11.451	6	36.2	8	1	0.83845	0.91641	-0.0379102	NaN	1
	531	Tb927.10.4120;Tb927.10.4110	Tb927.10.4120;Tb927.10.4110	RPL30;RPL30	60S ribosomal protein L30 (RPL30);60S ribosomal protein L30 (RPL30)	11.512	66.7	0	36.735	2		0.953467	-0.0206942	0.986538	0.00588631		66.7	7	7	0.813471	0.968804	-0.0137639	3.5244	9	50.5	5	5	0.84131	0.94618	-0.0240262	8.5984	6	66.7	7	7	0.8577	0.9456	-0.0242925	4.1757	7
	2032	Tb927.8.6060	Tb927.8.6060		2-amino-3-ketobutyrate coenzyme A ligase, putative,glycine acetyltransferase, putative	43.734	66.6	0	323.31	1		1.00471	0.00204109	0.343189	0.464467		65.8	22	22	0.831255	0.984737	-0.00667992	11.337	28	66.6	23	23	0.89784	1.016	0.00689371	7.6905	35	66.1	23	23	0.94118	1.0137	0.00590945	6.0795	36
	106	Tb927.10.10280;Tb10.v4.0053;Tb10.v4.0052;Tb927.10.10360	Tb927.10.10280;Tb10.v4.0053;Tb10.v4.0052;Tb927.10.10360		microtubule-associated protein, putative;hypothetical protein,chrX additional, unordered contigs;microtubule-associated protein 2,chrX additional, unordered contigs;microtubule-associated protein, putative	267.6	66.5	0	18.956	4		1.00994	0.00429618	0.46254	0.334851		66.5	4	4	1.00228	1.19241	0.0764245	32.676	5	63.8	2	2	0.87812	0.99977	-9.98992e-05	23.479	3	66.5	3	3	0.78076	0.8641	-0.063436	7.903	5
	280	Tb927.1.740	Tb927.1.740		hypothetical protein, conserved	48.865	66.2	0	323.31	1	1	0.983126	-0.00739098	0.975026	0.0109837		61.8	20	20	0.828912	0.989903	-0.00440736	5.4641	31	53.3	15	15	0.86028	0.98308	-0.00741114	6.1113	28	52.9	16	16	0.88462	0.97644	-0.0103544	6.788	26
	1037	Tb927.11.6280;REV__Tb927.10.5140	Tb927.11.6280	PPDK	pyruvate phosphate dikinase (PPDK)	100.45	65.9	0	323.31	2		0.972353	-0.0121762	0.972163	0.0122608		50.3	37	37	0.828638	0.985707	-0.00625207	10.063	46	59.9	42	42	0.84974	0.96392	-0.015959	15.479	74	57.5	44	44	0.90165	0.96757	-0.0143176	8.9087	61
	2130	Tb927.9.11600	Tb927.9.11600	gim5B	unspecified product (gim5B)	25.975	65.6	0	5.658	1		0.928574	-0.0321833	0.841974	0.0747016		45.6	8	1	0.720928	0.843953	-0.0736817	NaN	1	65.6	13	1	0.82161	0.92629	-0.033253	NaN	1	39.8	8	1	0.96111	1.0242	0.0103848	NaN	1
	1413	Tb927.4.3590;Tb927.4.3570	Tb927.4.3590;Tb927.4.3570		translation elongation factor 1-beta, putative;translation elongation factor 1-beta, putative	24.334	65.5	0	103.55	2		1.0338	0.0144355	0.279277	0.553965		57.5	9	7	0.834864	0.965251	-0.0153597	10.168	9	48.2	7	6	0.99224	1.1333	0.0543449	8.0717	9	65.5	11	9	0.9346	1.01	0.00432137	9.4779	14
	1758	Tb927.7.2700	Tb927.7.2700	B5R	NADH-cytochrome b5 reductase, putative (B5R)	31.856	65.2	0	181.1	1	1	1.04669	0.0198177	0.193193	0.714009		48.1	13	13	0.856458	1.02608	0.0111825	6.5976	13	53	15	15	0.87139	0.98585	-0.00618916	24.956	22	53	15	15	1.057	1.1336	0.0544598	8.6798	23
	1762	Tb927.7.280	Tb927.7.280	PPIase	cyclophilin-type peptidyl-prolyl cis-trans isomerase, putative (PPIase)	24.302	64.9	0	130.62	1	1	1.04319	0.0183642	0.16285	0.788213		48	8	8	0.83703	1.00257	0.00111341	8.9043	8	50.7	8	8	0.90715	1.0172	0.00740635	12.542	10	52.9	10	10	1.0391	1.1132	0.0465732	6.944	11
	1218	Tb927.3.1380	Tb927.3.1380		ATP synthase beta chain, mitochondrial precursor,ATP synthase F1, beta subunit	55.775	64.9	0	323.31	1	1	1.00682	0.00295238	0.266426	0.574424		59.9	19	19	0.865726	1.0253	0.0108531	8.8642	37	61.7	20	20	0.88106	0.99807	-0.000838998	8.3439	45	62	20	20	0.92478	0.99734	-0.00115676	10.786	38
	2221	Tb927.9.3000	Tb927.9.3000		cytidine deaminase, putative	19.171	64.8	0	57.025	1	1	0.976576	-0.0102939	0.835508	0.0780492		49.5	6	6	0.788644	0.941708	-0.0260836	12.488	7	64.8	7	7	0.87382	0.98842	-0.00505848	9.8888	8	52.7	6	6	0.9288	1.0006	0.000260499	11.506	8
	2258	Tb927.9.5690	Tb927.9.5690		60S acidic ribosomal protein, putative	11.09	64.6	0	26.194	1		1.00731	0.00316367	0.214996	0.66757		50.4	3	3	0.841538	1.00779	0.00337004	12.88	4	64.6	4	4	0.90865	1.0201	0.00864275	12.286	4	64.6	4	4	0.93036	0.99421	-0.00252187	10.669	6
	1883	Tb927.7.7410	Tb927.7.7410		oxidoreductase, putative	35.787	64.5	0	285.33	1	1	0.997739	-0.000983072	0.545856	0.262922		61.5	17	17	0.834655	1	0	84.12	24	42.1	10	10	0.91114	1.027	0.0115704	9.3867	15	64.5	18	18	0.895	0.96712	-0.0145196	9.8381	24
	2263	Tb927.9.5900	Tb927.9.5900	GDH	glutamate dehydrogenase (GDH)	112.11	64.3	0	323.31	1	1	0.994622	-0.00234182	0.760728	0.118771		61.8	49	49	0.84076	1.0048	0.00208092	9.805	87	60.5	48	48	0.8696	0.98341	-0.00726538	8.4014	103	63.3	51	51	0.92254	0.99577	-0.00184096	8.1565	95
	1003	Tb927.11.5450	Tb927.11.5450		malic enzyme	63.119	64.1	0	295.56	1	1	1.01383	0.00596327	0.109779	0.959481		57.8	21	21	0.838645	1.00096	0.000417157	14.161	27	61.3	23	23	0.89361	1.0125	0.00539503	10.535	36	59	22	22	0.95466	1.0282	0.0120776	17.448	30
	227	Tb927.11.11330;Tb11.v5.1035;Tb11.v5.1034;Tb927.11.11290	Tb927.11.11330;Tb11.v5.1035		heat shock protein 70;heat shock protein 70 (hsp70), putative	71.408	63.7	0	323.31	4		1.01552	0.0066875	0.15719	0.803576		54.6	31	27	0.851716	1.01657	0.00713729	9.0208	39	58.7	33	31	0.87838	0.99489	-0.00222493	9.8036	48	57.8	35	32	0.94599	1.0355	0.0151501	14.244	53
	229	Tb927.10.2110;Tb927.10.2100;Tb11.v5.1046;Tb927.10.2090	Tb927.10.2110;Tb927.10.2100;Tb11.v5.1046;Tb927.10.2090	TEF1;TEF1;TEF1	elongation factor 1-alpha (TEF1);elongation factor 1-alpha,EF-1-alpha (TEF1);elongation factor 1-alpha, putative;elongation factor 1-alpha,EF-1-alpha (TEF1)	49.105	63.5	0	312.17	4		1.00488	0.00211621	0.402755	0.39496		57	20	20	0.822571	0.974564	-0.0111897	13.616	35	54.3	19	19	0.92092	1.035	0.0149403	10.497	48	63.5	23	23	0.93974	1.006	0.00259798	9.1511	37
	1067	Tb927.11.7510;Tb927.11.7460	Tb927.11.7510;Tb927.11.7460		glucose-regulated protein 78, putative,luminal binding protein 1 (BiP), putative;glucose-regulated protein 78, putative,luminal binding protein 1 (BiP), putative	71.434	63.4	0	323.31	2		0.991615	-0.00365704	0.93553	0.0289421		58.8	32	32	0.831393	0.985028	-0.0065516	13.394	62	55.9	33	33	0.88728	0.99563	-0.00190203	6.6891	60	63.1	38	38	0.92378	0.99422	-0.0025175	5.8219	73
	2076	Tb927.8.7410;Tb927.4.5010	Tb927.8.7410;Tb927.4.5010		calreticulin, putative;calreticulin, putative	45.021	62.8	0	323.31	2		0.96919	-0.013591	0.786747	0.104165		55.4	20	20	0.777968	0.923873	-0.0343878	12.322	24	58	22	22	0.8545	0.95782	-0.0187161	13.208	34	46.8	21	21	0.94924	1.0288	0.012331	7.973	29
	2114	Tb927.9.10630	Tb927.9.10630		hypothetical protein, conserved	28.977	62.8	0	323.31	1	1	0.972744	-0.0120015	0.992254	0.00337724		62.8	10	10	0.814863	0.965997	-0.0150243	10.687	16	62.4	9	9	0.86771	0.97618	-0.0104701	5.3312	12	47.4	7	7	0.90966	0.97609	-0.0105101	9.4463	13
	187	Tb927.10.5620;Tb11.v5.0531	Tb927.10.5620;Tb11.v5.0531	ALD	fructose-bisphosphate aldolase, glycosomal (ALD);fructose-bisphosphate aldolase, glycosomal, putative	41.071	62.4	0	256.8	2		0.974646	-0.0111531	0.999769	0.000100257		51.9	20	20	0.825764	0.974849	-0.0110627	17.358	29	50.8	17	17	0.85517	0.97546	-0.0107905	14.017	24	55.4	21	21	0.89772	0.97363	-0.0116061	13.454	33
	1941	Tb927.8.2540	Tb927.8.2540		3-ketoacyl-CoA thiolase, putative	46.244	62.3	0	323.31	1	1	1.01611	0.00693897	0.149485	0.825402		60.7	21	21	0.834307	0.99552	-0.00194997	11.991	36	60.5	20	20	0.89207	1.0173	0.00744904	7.7857	44	57.3	18	18	0.96456	1.0359	0.0153178	17.868	36
	247	Tb927.1.2400;Tb927.1.2380;Tb927.1.2360;Tb927.1.2340;Tb11.v5.0468	Tb927.1.2400;Tb927.1.2380;Tb927.1.2360;Tb927.1.2340;Tb11.v5.0468		alpha tubulin;alpha tubulin;alpha tubulin;alpha tubulin;alpha tubulin, putative	49.787	62.3	0	323.31	5		0.998221	-0.000773243	0.531892	0.274177		57.9	19	19	0.869036	1.0373	0.0159048	13.099	31	62.3	20	20	0.86959	0.98672	-0.00580607	10.926	38	56.1	17	17	0.90371	0.97181	-0.0124186	4.8793	32
	476	Tb927.10.2530	Tb927.10.2530		adenylate kinase, putative	24.941	62.2	0	144.7	1	1	1.09206	0.0382456	0.14389	0.84197		44.1	9	9	0.848896	1.01256	0.00541905	16.062	15	49.1	9	9	0.92471	1.043	0.0182843	11.398	16	52.3	12	12	1.1075	1.2332	0.0910335	17.597	16
	2147	Tb927.9.12630;Tb927.9.12590;Tb927.9.12570;Tb927.9.12550;Tb927.9.12610	Tb927.9.12630;Tb927.9.12590;Tb927.9.12570;Tb927.9.12550;Tb927.9.12610	glk1;glk1;glk1;glk1;glk1	glycerol kinase, glycosomal (glk1);glycerol kinase, glycosomal (glk1);glycerol kinase, glycosomal (glk1);glycerol kinase, glycosomal (glk1);glycerol kinase, glycosomal (glk1)	56.426	61.7	0	323.31	5		0.957373	-0.0189187	0.907376	0.0422126		60	28	28	0.834237	1.00007	3.03995e-05	8.8716	51	58.4	26	26	0.82651	0.93325	-0.030002	6.655	55	61.7	31	31	0.86656	0.94019	-0.0267844	4.6662	63
	446	Tb927.10.16120	Tb927.10.16120		inosine-5-monophosphate dehydrogenase,IMP dehydrogenase	48.481	61.5	0	323.31	1		1.00909	0.00393196	0.263036	0.579985		40.7	15	15	0.845666	1.01891	0.00813625	6.6362	21	38.9	13	13	0.90145	1.0233	0.010003	12.172	22	61.5	22	22	0.91221	0.9855	-0.00634337	14.884	28
	727	Tb927.11.11460	Tb927.11.11460	ATOM69	hypothetical protein, conserved	68.998	60.8	0	323.31	1	1	0.999824	-7.64409e-05	0.508772	0.293477		40.4	23	23	0.849185	1.00855	0.00369873	13.957	33	55.4	27	27	0.86374	0.98587	-0.00618035	13.628	40	44	25	25	0.93263	1.0052	0.00225248	19.15	32
	972	Tb927.11.4450	Tb927.11.4450	ALBA2	ALBA-Domain Protein (ALBA2)	12.757	60.7	0	21.949	1		1.043	0.0182858	0.344825	0.462402		60.7	5	5	0.774293	0.872753	-0.0591088	5.2869	6	41	3	3	1.0238	1.1792	0.0715875	3.8506	6	59.8	5	5	1.0296	1.1025	0.0423786	18.767	8
	1116	Tb927.11.9450	Tb927.11.9450	PPIase	cyclophilin type peptidyl-prolyl cis-trans isomerase, putative (PPIase)	20.52	60	0	44.783	1	1	1.00767	0.00332016	0.448736	0.348009		32.6	3	3	0.87222	1.04965	0.0210437	21.081	3	60	5	5	0.80396	0.90806	-0.0418855	25.65	5	60	5	5	0.991	1.0735	0.030802	37.09	6
	1286	Tb927.3.3780;Tb927.3.3760	Tb927.3.3780;Tb927.3.3760	TXN1b;TXN1a	tryparedoxin;tryparedoxin (TRYP1)	15.891	59.7	0	81.76	2	1	0.991589	-0.00366822	0.686885	0.163116		59.7	6	6	0.807298	0.967212	-0.0144785	11.171	6	59.7	6	6	0.88565	0.99011	-0.00431655	41.06	7	50	5	5	0.94943	1.0181	0.00779044	9.1965	7
	1625	Tb927.6.2790;REV__Tb927.6.2790	Tb927.6.2790		L-threonine 3-dehydrogenase, putative	36.957	59.6	0	225.72	2	1	1.00308	0.00133745	0.397677	0.40047		56	13	13	0.82672	0.98668	-0.00582372	5.856	24	56	13	13	0.90689	1.0226	0.00970579	3.9677	40	57.2	13	13	0.92522	1.0003	0.000130269	5.4898	34
	391	Tb927.10.14000	Tb927.10.14000	ACO	aconitase (ACO)	98.314	59.5	0	323.31	1	1	0.991211	-0.00383385	0.821365	0.085464		53.7	33	33	0.829738	0.995818	-0.0018202	13.202	40	50.3	30	30	0.86743	0.97688	-0.0101588	9.1324	46	52.6	32	32	0.92368	1.0011	0.000477461	12.508	42
	389	Tb927.10.1390	Tb927.10.1390		hypoxanthine-guanine phosphoribosyltransferase, putative	26.36	59.4	0	61.624	1		0.982713	-0.00757324	0.996655	0.00145513		46.6	8	8	0.825764	0.981066	-0.008302	4.4084	10	59.4	10	10	0.87042	0.98156	-0.00808315	24.284	12	46.6	8	8	0.91747	0.98552	-0.00633456	8.3155	12
	525	Tb927.10.4000	Tb927.10.4000		methylglutaconyl-CoA hydratase, mitochondrial precursor, putative	29.195	59.2	0	73.787	1	1	1.02161	0.00928659	0.292346	0.534103		41.9	6	6	0.815395	0.971723	-0.0124576	11.212	9	55.2	10	10	0.89387	1.0089	0.00384812	9.0779	15	49.1	8	8	0.98892	1.0876	0.0364692	19.964	12
	724	Tb927.11.11370;Tb927.11.11360	Tb927.11.11370;Tb927.11.11360	RACK1;RACK1	receptor for activated C kinase 1 (RACK1);receptor for activated C kinase 1 (RACK1)	34.69	59.1	0	231	2		1.0077	0.00333061	0.390402	0.408488		45.9	12	12	0.808081	0.969462	-0.0134692	50.505	17	49.7	13	13	0.9326	1.0534	0.0225933	13.799	19	59.1	15	15	0.92855	1.002	0.000867722	8.8054	20
	882	Tb927.11.16730	Tb927.11.16730	GCVL-2	dihydrolipoyl dehydrogenase (GCVL-2)	50.433	59.1	0	323.31	1	1	0.996196	-0.00165525	0.669375	0.17433		55.3	21	21	0.846525	1.00809	0.00350146	6.29	31	55.3	22	22	0.86821	0.98251	-0.00766302	7.0244	42	55.1	21	21	0.92853	0.99815	-0.000804189	6.7215	32
	1272	Tb927.3.3330	Tb927.3.3330		heat shock protein 20, putative	15.842	58.9	0	53.188	1	1	0.999209	-0.00034388	0.514155	0.288906		48.9	8	8	0.859106	1.03103	0.013273	15.398	9	58.9	10	10	0.84546	0.96336	-0.0162114	5.8391	11	46.1	7	7	0.95554	1.0044	0.0019067	15.347	11
	2115	Tb927.9.10640	Tb927.9.10640		synaptojanin (N-terminal domain), putative	83.045	58.9	0	323.31	1		0.983559	-0.00719937	0.943324	0.0253392		42.9	23	23	0.822978	0.971629	-0.0124998	7.5979	35	47.9	25	25	0.87851	0.99022	-0.00426831	9.2828	35	54.3	30	30	0.92209	0.98894	-0.00483006	9.2369	44
	1668	Tb927.6.4300;Tb927.6.4280	Tb927.6.4300;Tb927.6.4280	GAPDH;GAPDH	glyceraldehyde 3-phosphate dehydrogenase, glycosomal (GAPDH);glyceraldehyde 3-phosphate dehydrogenase, glycosomal (GAPDH)	39.047	58.8	0	281.14	2		0.982585	-0.00763008	0.920085	0.036172		54.6	18	18	0.821693	0.981643	-0.00804629	7.594	32	52.4	17	16	0.88407	0.99678	-0.00140068	9.6424	34	52.9	16	14	0.90463	0.96952	-0.0134432	9.8789	28
	204	Tb927.10.2890;Tb11.v5.0650	Tb927.10.2890;Tb11.v5.0650		enolase;enolase, putative	46.592	58.7	0	212.59	2		1.00658	0.00284874	0.377241	0.423381		33.3	10	10	0.823249	0.971251	-0.0126685	9.1808	13	52.7	17	17	0.91095	1.0319	0.0136376	7.6989	21	45.2	14	14	0.93395	1.0176	0.0075771	10.092	19
	818	Tb927.11.14570	Tb927.11.14570		hypothetical protein, conserved	46.609	58.7	0	323.31	1	1	0.980679	-0.00847318	0.988142	0.00518067		48.6	15	15	0.815328	0.976944	-0.0101303	8.9698	18	45.2	11	11	0.86737	0.97849	-0.00944361	10.966	16	50.2	15	15	0.91297	0.98663	-0.00584568	18.602	20
	1755	Tb927.7.2670	Tb927.7.2670	ZC3H21	zinc finger protein family member, putative (ZC3H21)	49.686	58.6	0	144.11	1		1.03278	0.0140081	0.335494	0.474315		47.1	15	11	0.756315	0.906043	-0.042851	34.545	14	39.7	11	9	0.96831	1.1032	0.0426543	5.1012	11	53.8	18	14	1.0061	1.1021	0.042221	17.93	17
	873	Tb927.11.16480	Tb927.11.16480		enoyl-CoA hydratase/isomerase family protein, putative	40.234	58.6	0	137.77	1	1	1.01332	0.005745	0.171143	0.766642		47.5	13	13	0.844666	1.01092	0.00471593	9.4444	16	56.1	16	16	0.91783	1.0334	0.0142685	22.049	21	37.3	10	10	0.92229	0.99598	-0.00174938	10.163	16
	104	Tb927.10.4330;Tb11.v5.1012;Tb10.v4.0043	Tb927.10.4330;Tb11.v5.1012;Tb10.v4.0043		2-oxoisovalerate dehydrogenase beta subunit, mitochondrial precursor, putative;2-oxoisovalerate dehydrogenase beta subunit, mitochondrial precursor, putative;branched-chain alpha-keto acid dehydrogenase e1-beta subunit precursor, putative,chrX additional	40.222	58.2	0	91.317	3		0.981674	-0.00803263	0.665527	0.176835		48.6	9	9	0.777303	0.925326	-0.0337051	13.621	12	47.6	8	8	0.94001	1.0517	0.0218919	14.8	11	39.9	8	8	0.90251	0.97211	-0.0122846	3.949	12
	1143	Tb927.11.9980	Tb927.11.9980		2-oxoglutarate dehydrogenase E1 component, putative	112.95	58.2	0	323.31	1	1	1.0103	0.00445174	0.0611496	1.21361		54.4	44	44	0.843668	1.00266	0.00115239	10.276	61	49.7	42	42	0.89482	1.0122	0.00526633	11.513	63	49.6	44	44	0.93695	1.0161	0.00693645	9.1735	63
	1839	Tb927.7.5680	Tb927.7.5680		deoxyribose-phosphate aldolase, putative	30.037	57.9	0	87.579	1		0.964139	-0.0158602	0.902261	0.0446676		41.4	11	11	0.838574	0.998602	-0.000607568	12.746	14	47.9	11	11	0.84802	0.95961	-0.0179052	5.5437	15	57.5	13	13	0.86736	0.93526	-0.0290676	29.904	20
	373	Tb927.10.13360	Tb927.10.13360	EF-Tu	elongation factor Tu, putative	51.849	57.7	0	210.68	1	1	1.00159	0.000691081	0.465276	0.332289		34.9	16	16	0.842105	0.998004	-0.000867718	9.6531	20	47	18	18	0.865	0.97586	-0.0106125	13.958	25	43.8	17	17	0.9458	1.0317	0.0135534	7.5452	19
	927	Tb927.11.2750	Tb927.11.2750		hypothetical protein, conserved	52.991	57.7	0	154.01	1		0.987201	-0.00559449	0.803217	0.095167		50.7	11	11	0.840548	0.968336	-0.0139741	13.796	15	48.4	9	9	0.88644	1.009	0.00389117	21.876	11	57.7	16	16	0.89851	0.98469	-0.00670047	11.657	19
	1226	Tb927.3.1690	Tb927.3.1690		hypothetical protein, conserved	17.154	57.2	0	32.155	1	1	1.02399	0.010295	0.156949	0.804241		39.3	6	6	0.882535	1.05457	0.0230771	10.67	7	28.3	3	3	0.87264	0.99176	-0.00359341	19.817	4	52.4	8	8	0.94654	1.0266	0.0114013	6.4772	6
	2035	Tb927.8.6110	Tb927.8.6110	HMGS	hypothetical protein, conserved	54.669	57.1	0	323.31	1	1	1.03011	0.0128832	0.0742955	1.12904		53.1	20	20	0.843384	1.00464	0.0020109	6.0226	26	52.3	21	21	0.91788	1.0373	0.0159044	6.0777	35	52.5	21	21	0.97631	1.0489	0.0207341	11.786	35
	333	Tb927.10.11930	Tb927.10.11930		beta-D-hydroxybutyrate dehydrogenase	27.645	56.9	0	323.31	1	1	0.995673	-0.00188315	0.787469	0.103767		49.2	10	10	0.831324	0.991277	-0.0038051	5.3646	18	52.3	11	11	0.88334	0.9914	-0.00375109	4.4392	18	53.8	11	11	0.93761	1.0044	0.0019067	6.7125	19
	2057	Tb927.8.6580	Tb927.8.6580		succinate dehydrogenase flavoprotein, putative	66.88	56.7	0	207.82	1	1	1.00359	0.00155512	0.419195	0.377584		34	13	13	0.854701	1.01418	0.00611419	12.774	18	55.2	25	25	0.90597	1.0238	0.0102151	17.286	32	38.9	20	20	0.90413	0.9735	-0.011664	11.359	25
	1720	Tb927.7.1300	Tb927.7.1300		protein disulfide isomerase, putative	41.939	56.5	0	140.33	1		1.01097	0.00473661	0.350018	0.45591		46.4	17	17	0.811162	0.964413	-0.0157369	9.8671	22	49.3	18	18	0.92521	1.0473	0.0200711	17.788	25	48	18	18	0.9525	1.023	0.00987563	18.929	24
	816	Tb927.11.1450	Tb927.11.1450		2-oxoglutarate dehydrogenase E1 component, putative	113.38	56.4	0	323.31	1	1	1.02021	0.00869073	0.134945	0.869843		51.7	49	49	0.861326	1.01088	0.00469832	11.877	69	53.9	50	50	0.92695	1.0472	0.0200296	49.958	81	48.6	44	44	0.93649	1.0031	0.00134423	10.398	69
	2101	Tb927.8.890	Tb927.8.890	Rab1A	small GTP-binding protein Rab1, putative	22.714	56.2	0	117.78	1		0.965469	-0.0152615	0.95175	0.0214773		33.7	6	5	0.87108	0.987752	-0.00535217	21.197	7	56.2	8	7	0.82564	0.95943	-0.0179867	35.131	10	56.2	8	7	0.87667	0.94963	-0.0224456	16.874	11
	1072	Tb927.11.7780	Tb927.11.7780	ATOM46	hypothetical protein, conserved	46.237	56.1	0	176.55	1	1	0.987751	-0.00535259	0.725121	0.13959		39.9	12	12	0.820883	0.981451	-0.00813156	7.6067	15	56.1	16	16	0.90114	1.0205	0.00881301	16.829	22	38.7	12	12	0.88834	0.96219	-0.0167392	14.966	15
	924	Tb927.11.2650	Tb927.11.2650		heat shock protein 84, putative	84.2	55.8	0	323.31	1		0.990852	-0.00399132	0.995801	0.00182731		46.3	30	30	0.830772	0.992457	-0.00328813	15.665	49	47.3	33	33	0.87198	0.98962	-0.00453154	10.148	50	53.4	35	35	0.91877	0.99048	-0.00415429	18.532	58
	366	Tb927.10.12960	Tb927.10.12960	RAB5A	ras-related protein rab-5,small GTPase, putative (RAB5A)	24.484	55.7	0	62.018	1		1.00322	0.00139691	0.479789	0.31895		42.6	6	6	0.773395	0.908265	-0.0417873	13.117	5	52.2	7	7	0.97584	1.1034	0.042733	1.6524	9	39.1	5	5	0.92802	1.0075	0.00324505	8.1741	7
	584	Tb927.10.6190	Tb927.10.6190	ALDH	aldehyde dehydrogenase, putative (ALDH)	54.033	55.7	0	323.31	1	1	0.994763	-0.00228031	0.655478	0.183442		43.3	17	17	0.854482	1.01733	0.00745972	8.1989	21	45.3	16	16	0.86956	0.98071	-0.0084594	7.1045	25	53.9	18	18	0.91133	0.98664	-0.00584128	13.515	25
	1009	Tb927.11.5600	Tb927.11.5600	ATOM14	hypothetical protein, conserved	13.577	55.5	0	63.211	1	1	1.00009	3.96337e-05	0.498415	0.302409		55.5	5	5	0.845166	1.01713	0.00737561	10.134	5	52.1	4	4	0.84923	0.96038	-0.0175569	6.2031	5	52.1	4	4	0.94752	1.024	0.0103	6.4067	4
	1553	Tb927.5.4330	Tb927.5.4330		dihydrolipoamide branched chain transacylase, putative	47.651	55.4	0	189.47	1	1	1.02301	0.00987891	0.267368	0.572891		53.3	20	20	0.827198	0.982222	-0.00779043	15.611	25	51.7	19	19	0.95216	1.0862	0.0359098	12.242	23	51.5	20	20	0.92732	1.0035	0.00151738	14.988	26
	524	Tb927.10.3990	Tb927.10.3990	DHH1	DHH1 (DHH1)	46.468	55.4	0	146.1	1		1.0349	0.0149003	0.0827395	1.08229		45.1	16	16	0.868961	1.03031	0.0129688	20.944	20	46.1	14	14	0.94689	1.0661	0.0277979	6.5552	20	44.6	14	14	0.92369	1.0091	0.00393421	31.769	18
	1033	Tb927.11.6210	Tb927.11.6210	CYP51	sterol 14-alpha-demethylase (CYP51)	54.372	54.9	0	137.66	1		1.00672	0.0029097	0.231006	0.636378		40.1	19	19	0.827746	0.994233	-0.00251165	16.2	24	50.7	22	22	0.9032	1.0201	0.00864275	9.53	30	43.2	22	22	0.93432	1.006	0.00259798	15.077	30
	1921	Tb927.8.1860	Tb927.8.1860		pitrilysin-like metalloprotease,metallo-peptidase, Clan ME, Family M16C	114.53	54.8	0	323.31	1	1	0.997578	-0.00105314	0.716184	0.144975		46.3	37	37	0.84538	1.00473	0.00205023	16.779	54	45.8	39	39	0.86917	0.99427	-0.00249566	23.642	60	47.4	40	40	0.92251	0.99377	-0.00271412	16.537	57
	1519	Tb927.5.3090	Tb927.5.3090		hypothetical protein, conserved	11.655	54.5	0	42.139	1	1	1.01136	0.00490513	0.41028	0.386919		33.7	2	2	0.912992	1.0934	0.0387783	10.986	3	44.6	3	3	0.88134	1.0068	0.00294321	9.9596	3	43.6	3	3	0.86876	0.93971	-0.0270062	10.365	4
	458	Tb927.10.2020	Tb927.10.2020	HK2	hexokinase (HK2)	51.148	53.9	0	323.31	1		0.994773	-0.00227603	0.573326	0.241598		50.1	19	1	0.872676	1.01725	0.00742898	NaN	1	48.4	19	0	NaN	NaN		NaN	0	53.9	22	1	0.90679	0.97279	-0.0119809	8.1113	2
	595	Tb927.10.6810	Tb927.10.6810		guanylate kinase, putative	29.956	53.4	0	110.43	1		1.00238	0.00103264	0.46882	0.328994		45.5	9	9	0.88968	1.04774	0.0202515	11.446	12	42	8	8	0.84486	0.95478	-0.0200967	45.431	10	43.6	9	9	0.9402	1.0068	0.00294321	15.369	12
	914	Tb927.11.2410	Tb927.11.2410		hypothetical protein, conserved	24.58	53.2	0	82.546	1		1.03694	0.0157534	0.256926	0.590193		51.4	11	11	0.805477	0.947957	-0.0232113	13.173	15	50	9	9	0.93453	1.0647	0.0272273	5.5059	13	40.5	8	8	1.0293	1.1047	0.0432444	11.25	13
	770	Tb927.11.13190;Tb927.11.13090	Tb927.11.13190;Tb927.11.13090		elongation factor 1 gamma, putative;elongation factor 1 gamma, putative	46.275	52.5	0	241.53	2		1.00355	0.00153939	0.466361	0.331278		33.7	10	10	0.80782	0.961723	-0.0169498	12.811	13	46.8	13	13	0.86459	0.97244	-0.0121372	26.69	20	39.1	12	12	0.99681	1.0807	0.0337052	16.909	17
	670	Tb927.10.9830	Tb927.10.9830		hypothetical protein, conserved	17.194	52.2	0	141.74	1	1	1.00613	0.00265206	0.40159	0.396217		52.2	6	6	0.853898	0.963762	-0.01603	57.579	9	52.2	6	6	0.90245	1.0276	0.0118241	7.2888	9	51.6	5	5	0.94838	1.0284	0.0121621	0.55474	6
	968	Tb927.11.4320	Tb927.11.4320		hypothetical protein, conserved	51.878	52.2	0	323.31	1	1	1.00679	0.00294044	0.102321	0.990035		48.2	13	13	0.852152	1.00958	0.00414117	14.236	21	47.2	13	13	0.8748	0.99954	-0.000199821	9.0419	21	46.9	13	13	0.93591	1.0113	0.00488001	7.7016	20
	1248	Tb927.3.2230	Tb927.3.2230		succinyl-CoA synthetase alpha subunit, putative	31.464	52.2	0	285.69	1	1	0.984151	-0.00693835	0.952281	0.0212349		27.9	8	8	0.835771	0.986096	-0.00608076	2.5347	15	52.2	12	12	0.8803	0.99213	-0.00343142	3.098	22	43.2	10	10	0.89669	0.97431	-0.0113028	12.456	18
	625	Tb927.10.8030	Tb927.10.8030		hypothetical protein, conserved	28.834	51.8	0	180.98	1	1	1.04254	0.018092	0.0666316	1.17632		51.8	13	13	0.907523	1.07832	0.0327469	47.371	17	43.5	11	11	0.91355	1.0222	0.00953588	3.763	16	43.5	12	12	0.93704	1.028	0.0119931	6.9444	19
	2106	Tb927.9.10310	Tb927.9.10310	MCP11	mitochondrial carrier protein (MCP11)	34.295	51.4	0	173.09	1	1	1.01293	0.00557917	0.0943041	1.02547		46.4	12	12	0.846453	1.01382	0.00596	10.162	14	51.4	14	14	0.91368	1.024	0.0103	10.914	17	42.3	11	11	0.93352	1.0011	0.000477461	5.7463	13
	1418	Tb927.4.3680	Tb927.4.3680		protein phosphatase 2C, putative	29.99	51.3	0	89.344	1	1	0.97883	-0.00929294	0.877818	0.0565954		44.1	8	8	0.796622	0.953562	-0.0206512	14.25	10	43.7	9	9	0.87161	0.98999	-0.00436919	7.9181	11	51.3	11	11	0.91731	0.99344	-0.00285836	9.0492	13
	197	Tb927.7.2570;Tb11.v5.0611	Tb927.7.2570;Tb11.v5.0611		guide RNA associated protein, GAP2;hypothetical protein, conserved	52.545	51.2	0	216.58	2	1	1.00591	0.00255963	0.290416	0.536979		44	17	17	0.838645	1	0	10.967	17	47.8	16	16	0.88417	0.99408	-0.00257866	12.117	20	38.9	15	15	0.94855	1.0239	0.0102575	13.703	18
	2074	Tb927.8.7380;Tb927.4.5050	Tb927.8.7380;Tb927.4.5050		dihydrolipoamide dehydrogenase, point mutation,acetoin dehydrogenase e3 component, putative;dihydrolipoamide dehydrogenase, pseudogene, putative,acetoin dehydrogenase e3 component, point mutation,dihydrolipoamide dehydrogenase, point mutation	60.014	51.1	0	191.41	2	1	1.00639	0.00276653	0.382612	0.417242		45.2	17	17	0.867754	1.03107	0.0132865	17.615	25	41.8	15	15	0.90379	1.019	0.00817418	11.012	19	46.2	18	18	0.90139	0.97015	-0.0131611	16.04	24
	1289	Tb927.3.3900	Tb927.3.3900	CPT II	carnitine O-palmitoyltransferase II, putative (CPT II)	67.395	50.9	0	323.31	1	1	1.00681	0.00294818	0.260027	0.584981		38.6	18	18	0.857045	1.02088	0.00897342	11.976	24	40.4	17	17	0.89567	1.0092	0.00397724	5.0259	26	44.1	21	21	0.92553	0.99059	-0.00410606	10.854	29
	1059	Tb927.11.7150	Tb927.11.7150		NGG1 interacting factor 3-like	30.459	50.5	0	69.131	1		0.948857	-0.0227994	0.988722	0.00492566		30.6	8	8	0.783699	0.941354	-0.0262472	13.182	10	35.9	6	6	0.83311	0.9412	-0.0263181	32.333	7	33.5	9	9	0.89373	0.9642	-0.0158329	6.0585	12
	867	Tb927.11.16220	Tb927.11.16220		hypothetical protein, conserved	22.002	50.3	0	42.401	1	1	0.996365	-0.00158139	0.599288	0.222364		24.1	4	4	0.815927	0.983091	-0.00740637	1.8646	6	27.8	4	4	0.87399	0.98449	-0.00678869	5.9782	5	50.3	9	9	0.95305	1.022	0.0094509	4.4089	11
	863	Tb927.11.16130	Tb927.11.16130	NDPK	nucleoside diphosphate kinase (NDPK)	16.857	49.7	0	28.568	1		1.00667	0.00288752	0.434306	0.362204		43.8	6	6	0.845023	1.00844	0.00365049	9.7657	7	41.2	6	6	0.82743	0.94587	-0.0241685	6.3557	7	49.7	7	7	0.9867	1.0695	0.0291808	7.8539	8
	1659	Tb927.6.4140	Tb927.6.4140	PFC4	paraflagellar rod component, putative (PFC4)	13.009	49.6	0	9.4368	1		1.01699	0.00731851	0.292936	0.533228		9.6	1	1	0.801411	0.965158	-0.0154017	NaN	1	20.9	2	2	0.92212	1.0416	0.017701	1.3255	2	38.3	3	3	0.9681	1.0463	0.0196562	8.9558	3
	774	Tb927.11.13230	Tb927.11.13230		hypothetical protein, conserved	23.909	49.5	0	55.597	1		1.02643	0.0113314	0.0705878	1.15127		30.6	5	5	0.860067	1.03288	0.0140482	8.7981	6	11.6	2	2	0.92352	1.0421	0.0179094	5.3636	2	49.5	8	8	0.93233	1.0047	0.0020364	9.1696	10
	1299	Tb927.3.4390	Tb927.3.4390	GCVL-1	dihydrolipoamide dehydrogenase, putative (GCVL-1)	55.839	49.5	0	141.29	1	1	1.01745	0.007511	0.111433	0.952987		37.6	14	14	0.864528	1.03069	0.0131297	25.607	19	34.7	12	12	0.89413	1.0241	0.0103424	12.598	19	41.8	17	17	0.91917	0.99784	-0.000939091	31.35	23
	108	Tb11.v5.0537;Tb927.11.9920;Tb11.01.1680.v5	Tb11.v5.0537;Tb927.11.9920;Tb11.01.1680.v5		polyubiquitin, putative;polyubiquitin, putative;polyubiquitin, putative	70.128	49.4	0	25.364	3		1.03516	0.0150092	0.382762	0.417071		32.7	3	3	1.06157	1.26384	0.101692	29.766	4	32.7	3	3	0.80342	0.9089	-0.0414839	20.605	8	49.4	5	5	0.89102	0.96565	-0.0151803	10.506	6
	2309	Tb927.9.8410	Tb927.9.8410		chaperone protein DNAj, putative	35.594	49.4	0	134.46	1	1	0.982714	-0.00757292	0.7408	0.130299		33.5	9	9	0.799424	0.947239	-0.0235405	6.5074	14	36.2	8	8	0.85999	0.97889	-0.00926611	26.049	12	43.1	13	13	0.94819	1.0235	0.0100878	10.695	18
	962	Tb927.11.3980	Tb927.11.3980		mitochondrial processing peptidase alpha subunit, putative,metallo-peptidase, Clan ME, Family M16	57.037	49.4	0	323.31	1	1	1.00706	0.0030547	0.28023	0.552485		36.1	14	14	0.860067	1.02736	0.0117222	18.136	20	42.7	19	19	0.87955	0.99373	-0.0027316	5.7018	29	46.7	18	18	0.92545	1.0004	0.000173683	10.418	26
	1202	Tb927.2.5800	Tb927.2.5800	SBPase	sedoheptulose-1,7-bisphosphatase (SBPase)	35.502	49.4	0	147.34	1		0.984528	-0.00677195	0.713172	0.146805		44	10	10	0.856751	1.03168	0.0135463	11.344	16	38.6	9	9	0.8521	0.96139	-0.0171004	12.809	11	40.1	10	10	0.8952	0.96214	-0.0167617	9.425	15
	540	Tb927.10.4570;Tb927.10.4560	Tb927.10.4570;Tb927.10.4560		elongation factor 2;elongation factor 2	94.333	49.2	0	298.36	2		0.993655	-0.00276453	0.885681	0.0527225		35.2	21	21	0.832709	0.991375	-0.00376204	16.165	28	39.6	24	24	0.8829	1.0009	0.000390689	9.7854	33	38.3	26	26	0.9195	0.98873	-0.00492229	21.667	35
	2172	Tb927.9.13920;Tb927.9.13880;Tb927.9.13820	Tb927.9.13920;Tb927.9.13880;Tb927.9.13820	KMP-11	kinetoplastid membrane protein KMP-11 (KMP-11);unspecified product;kinetoplastid membrane protein KMP-11	11.076	48.9	0	16.772	3		0.983262	-0.00733076	0.749736	0.125091		31.5	3	3	0.789827	0.945716	-0.0242393	14.456	3	39.1	3	3	0.88404	0.99043	-0.00417621	31.464	3	31.5	3	3	0.94674	1.0149	0.00642325	2.4143	4
	1454	Tb927.4.600	Tb927.4.600		hypothetical protein, conserved	34.458	48.9	0	182.65	1	1	0.979514	-0.00898949	0.780857	0.107429		43.2	9	9	0.818465	0.940822	-0.0264924	12.66	12	39.7	9	9	0.89836	1.0128	0.00552369	9.3433	10	45.4	9	9	0.9101	0.98628	-0.00599977	8.3512	10
	2118	Tb927.9.10770	Tb927.9.10770	PABP2	Polyadenylate-binding protein 2 (Poly(A)-binding protein 2) (Poly(A)-binding protein II) (PABII) (Polyadenylate-binding nuclear protein 1) (Nuclear poly(A)-binding protein 1) (PABP2), putative (PABP2)	62.147	48.8	0	277.79	1		1.01139	0.00491912	0.339775	0.468809		43.2	19	19	0.841397	0.989217	-0.00470821	11.722	23	39.5	17	17	0.92854	1.0604	0.0254697	20.227	22	43.8	21	21	0.91561	0.98627	-0.00600418	8.4471	27
	2313	Tb927.9.8780	Tb927.9.8780		tRNA nucleotidyltransferase, putative	58.645	48.7	0	132.45	1	1	1.02422	0.0103941	0.23348	0.631751		34.8	14	14	0.855359	0.990001	-0.00436437	14.268	17	31	13	13	0.96083	1.08	0.0334238	9.634	16	32.1	14	14	0.92639	1.0049	0.00212285	13.797	16
	1425	Tb927.4.4070	Tb927.4.4070		mevalonate kinase, putative	35.544	48.6	0	99.742	1		0.997818	-0.000948877	0.525937	0.279067		41.3	8	8	0.846239	0.953925	-0.0204856	54.549	10	45.6	8	8	0.9275	1.0555	0.0234582	11.528	8	40.1	7	7	0.92398	0.98669	-0.00581927	11.337	9
	2262	Tb927.9.5890	Tb927.9.5890		solanesyl-diphosphate synthase, putative	39.253	48.5	0	176.71	1	1	0.975799	-0.0106395	0.915838	0.0381814		35.7	8	8	0.805932	0.959141	-0.0181177	11.77	11	42.1	10	10	0.86004	0.97116	-0.0127092	6.7665	15	41.5	11	11	0.92403	0.99749	-0.00109145	9.7406	18
	838	Tb927.11.15270	Tb927.11.15270		hypothetical protein, conserved	28.843	48.5	0	21.292	1		0.985415	-0.00638083	0.595253	0.225299		30.6	4	4	0.899362	1.08434	0.0351655	13.751	4	16.4	3	3	0.86431	0.97934	-0.00906651	14.152	3	28.4	4	4	0.84194	0.90107	-0.0452415	17.619	4
	1512	Tb927.5.2930	Tb927.5.2930		hypothetical protein, conserved	43.308	48.4	0	192.12	1	1	1.01861	0.00800883	0.25238	0.597944		36.8	18	18	0.838082	0.984543	-0.00676544	8.6536	23	33.2	11	11	0.93497	1.0639	0.0269008	15.165	15	42.2	18	18	0.9167	1.009	0.00389117	24.055	24
	729	Tb927.11.11520	Tb927.11.11520	PEX11	glycosomal membrane protein (PEX11)	24.027	48.2	0	69.16	1		0.983166	-0.00737305	0.812507	0.090173		45	9	9	0.844595	1.00908	0.00392646	6.0599	10	45	8	8	0.85787	0.98307	-0.00741556	6.2515	9	44	9	9	0.89332	0.95801	-0.01863	8.9489	11
	1927	Tb927.8.1990	Tb927.8.1990	TRYP2	peroxidoxin (TRYP2)	25.631	48.2	0	56.669	1	1	0.99318	-0.00297186	0.6166	0.209996		48.2	10	10	0.857927	1.0204	0.0087696	4.8612	14	48.2	9	9	0.89277	1.0056	0.00242526	5.0533	13	41.2	9	9	0.88065	0.95475	-0.0201103	5.906	16
	390	Tb927.10.1400;Tb927.10.1470	Tb927.10.1400;Tb927.10.1470	HGPRT;HGPRT	hypoxanthine-guanine phosphoribosyltransferase (HGPRT);hypoxanthine-guanine phosphoribosyltransferase (HGPRT)	23.36	48.1	0	100.39	2		0.99343	-0.00286271	0.790661	0.10201		44.3	6	6	0.832986	0.981547	-0.00808894	12.931	10	44.3	6	6	0.87858	1.0038	0.00164719	5.1136	9	48.1	7	7	0.91704	0.99507	-0.00214637	8.6645	10
	554	Tb927.10.5050	Tb927.10.5050		hypothetical protein, conserved	8.6908	48	0	13.196	1	1	1.01624	0.00699712	0.110133	0.958081		44	2	2	0.840901	1.00108	0.000469219	2.4778	2	48	2	2	0.89589	1.0332	0.0141844	3.2978	3	18.7	1	1	0.94762	1.0147	0.00633766	NaN	1
	377	Tb927.11.9710;Tb927.10.13500	Tb927.11.9710;Tb927.10.13500	RPL10A	60S ribosomal protein L10a, putative (RPL10A);60S ribosomal protein L10a	24.597	47.7	0	100.64	2		1.03594	0.0153354	0.238102	0.623238		25.2	5	5	0.828775	0.982511	-0.00766245	11.334	6	41.1	7	7	0.99666	1.122	0.0499929	10.827	9	31.8	7	7	0.92474	1.0085	0.0036759	6.7116	8
	689	Tb927.11.1020	Tb927.11.1020		ribokinase, putative	35.288	47.7	0	323.31	1		0.97773	-0.00978092	0.856569	0.0672377		47.7	12	12	0.842602	1.00795	0.00344028	9.2298	21	47.7	12	12	0.8652	0.96908	-0.0136404	10.552	23	39.9	11	11	0.88415	0.95688	-0.0191425	5.6436	22
	1947	Tb927.8.2740	Tb927.8.2740	TbRBP38	mitochondrial RNA binding protein (TbRBP38)	38.497	47.6	0	213.31	1	1	1.03082	0.0131814	0.231471	0.635503		32.8	9	9	0.927558	1.10246	0.042364	13.442	12	45.3	11	11	0.88863	1.0015	0.000650954	12.885	19	35.2	10	10	0.9164	0.99204	-0.00347082	7.3279	15
	135	Tb927.7.4970;Tb11.v5.0178	Tb927.7.4970;Tb11.v5.0178	GS	glutamine synthetase, putative;glutamine synthetase, putative	42.433	47.5	0	170.86	2		1.00964	0.00416724	0.208013	0.681909		47.5	13	13	0.846884	1.01207	0.00521227	17.985	18	44.6	11	11	0.90663	1.0249	0.0106815	6.6444	15	47.5	13	13	0.9096	0.99222	-0.00339202	6.6071	18
	2264	Tb927.9.5960	Tb927.9.5960		succinate dehydrogenase, putative	21.281	47.3	0	18.092	1	1	0.963387	-0.0161993	0.748008	0.126094		32.4	5	5	0.759186	0.882379	-0.0543449	13.913	7	25.5	4	4	0.86822	0.98209	-0.00784871	8.959	4	40.4	6	6	0.94981	1.0318	0.0135955	4.1532	6
	1391	Tb927.4.2500	Tb927.4.2500		protein kinase, putative,eukaryotic translation initiation factor 2-alpha kinase precursor, putative	111.92	47.3	0	323.31	1		0.986757	-0.00578983	0.868673	0.0611437		41.7	30	30	0.814664	0.970591	-0.0129637	9.4113	53	43.3	32	32	0.87612	0.9906	-0.00410168	10.372	52	44.1	34	34	0.92272	0.9993	-0.000304113	9.9893	58
	1540	Tb927.5.3810	Tb927.5.3810		orotidine-5-phosphate decarboxylase/orotate phosphoribosyltransferase, putative,OMPDCase-OPRTase, putative	49.955	47.2	0	177.69	1		0.993385	-0.00288258	0.634139	0.197816		30.6	13	13	0.81215	0.968523	-0.0138901	9.1801	15	37.6	13	13	0.9092	1.0256	0.010978	14.533	14	38	16	16	0.91034	0.98688	-0.00573565	12.034	19
	581	Tb927.10.6070	Tb927.10.6070		universal minicircle sequence binding protein (UMSBP), putative,predicted zinc finger protein	14.566	47.1	0	43.087	1		0.999922	-3.40235e-05	0.501457	0.299766		27.9	3	2	0.810833	0.962742	-0.0164901	2.3237	4	37.1	4	3	0.91344	1.0217	0.00932339	1.992	6	47.1	5	4	0.93171	1.0164	0.00706466	1.6899	9
	522	Tb927.10.390	Tb927.10.390		hypothetical protein, conserved	16.343	47	0	155.44	1		1.0101	0.00436489	0.432077	0.364439		9.4	1	1	0.943218	1.11978	0.0491339	NaN	1	38.9	3	3	0.84153	0.95034	-0.022121	5.7175	4	32.2	3	3	0.89533	0.96846	-0.0139183	10.763	2
	1718	Tb927.7.1270;Tb927.7.1250	Tb927.7.1270;Tb927.7.1250		hypothetical protein, conserved;hypothetical protein, conserved	35.715	47	0	124.1	2		0.971242	-0.0126725	0.950073	0.0222432		36	9	9	0.826856	0.990688	-0.00406332	5.5396	13	36	9	9	0.85322	0.96367	-0.0160717	5.9776	14	44.2	9	9	0.87715	0.95966	-0.0178826	10.401	11
	1782	Tb927.7.3430	Tb927.7.3430	PPIase	cyclophilin-type peptidyl-prolyl cis-trans isomerase, putative (PPIase)	25.548	46.8	0	51.186	1	1	0.947129	-0.0235907	0.989826	0.00444125		34.2	5	5	0.806322	0.960984	-0.0172838	6.0132	5	42.4	7	7	0.82296	0.93535	-0.0290258	12.994	6	40.3	7	7	0.87181	0.94523	-0.0244625	6.9695	7
	1184	Tb927.2.4590;Tb11.v5.0820;Tb927.2.4610	Tb927.2.4590;Tb11.v5.0820;Tb927.2.4610		branched-chain amino acid aminotransferase, putative;branched-chain amino acid aminotransferase, putative;branched-chain amino acid aminotransferase, putative	40.432	46.6	0	308.63	3	1	0.986138	-0.00606246	0.929951	0.0315399		37.9	9	9	0.826105	0.985125	-0.00650884	15.83	14	42	10	10	0.86316	0.97672	-0.0102299	4.2403	17	46.6	12	12	0.91767	0.99667	-0.00144861	13.618	17
	1259	Tb927.3.2670	Tb927.3.2670		hypothetical protein, conserved	28.84	46.5	0	34.37	1	1	0.908753	-0.0415543	0.787912	0.103522		24.5	5	5	0.629763	0.751033	-0.124341	14.23	5	23.8	4	4	0.84193	0.97909	-0.00917739	18.469	5	33.5	7	7	0.93943	1.0206	0.00885556	17.541	8
	1101	Tb927.11.900	Tb927.11.900	IDH	isocitrate dehydrogenase, putative (IDH)	46.77	46.5	0	155.12	1	1	0.97929	-0.00908864	0.994378	0.0024485		33.7	14	13	0.81706	0.975705	-0.0106815	8.4691	17	38.5	17	16	0.86746	0.97891	-0.00925723	22.354	22	40.2	17	17	0.91105	0.98327	-0.00732721	4.9337	23
	1074	Tb927.11.7900	Tb927.11.7900	RBP16	mitochondrial RNA binding protein,RBP16,RNA- binding protein of 16 kDa (RBP16)	15.118	46.1	0	86.955	1	1	1.05804	0.0245006	0.134873	0.870075		46.1	5	5	0.857633	0.993739	-0.00272745	7.2527	4	37.6	3	3	0.9287	1.0541	0.0228818	9.0739	6	34	4	4	1.0447	1.1307	0.0533474	18.64	3
	2078	Tb927.8.7530	Tb927.8.7530		3,2-trans-enoyl-CoA isomerase, mitochondrial precursor, putative	39.776	46.1	0	185.48	1	1	1.0128	0.00552224	0.284144	0.546461		38.3	8	8	0.873744	1.04065	0.0173039	5.685	13	33.8	8	7	0.9026	1.0219	0.0094084	6.3444	14	42.7	10	8	0.90363	0.97691	-0.0101454	4.4298	14
	139	Tb927.10.6060;Tb11.v5.0199	Tb927.10.6060;Tb11.v5.0199		universal minicircle sequence binding protein (UMSBP), putative,DNA-binding protein HEXBP, putative,zinc finger protein;universal minicircle sequence binding protein, putative	21.836	46	0	86.967	2		0.985811	-0.00620652	0.731057	0.136049		46	5	4	0.799616	0.950661	-0.0219745	12.579	7	46	5	4	0.8975	1.0158	0.00680821	18.646	8	46	5	4	0.91496	0.99208	-0.00345331	11.87	8
	902	Tb927.11.1980	Tb927.11.1980	ZC3H41	zinc finger protein family member, putative (ZC3H41)	58.459	45.5	0	80.589	1		0.988358	-0.00508559	0.641914	0.192523		32.3	12	12	0.780031	0.935979	-0.0287339	18.007	12	29.6	10	10	0.91461	1.027	0.0115704	9.9491	14	36.6	15	15	0.9331	1.0044	0.0019067	5.6903	16
	1129	Tb927.11.970	Tb927.11.970		hypothetical protein, conserved	23.691	45.5	0	58.38	1		1.02401	0.0103046	0.299167	0.524086		37.9	4	4	0.919794	1.10169	0.0420578	4.9047	4	24.2	4	4	0.80626	0.96818	-0.0140439	13.779	5	31.3	3	3	0.92973	1.0067	0.00290007	21.624	3
	905	Tb927.11.2060;Tb927.11.2050	Tb927.11.2060;Tb927.11.2050		60S acidic ribosomal subunit protein, putative;60S acidic ribosomal subunit protein, putative	34.627	45.1	0	136.89	2		0.977278	-0.00998183	0.666095	0.176464		28.1	7	7	0.781372	0.913993	-0.039057	10.102	13	41.4	10	10	0.93625	1.0677	0.0284492	7.7258	16	28.1	8	8	0.88906	0.95645	-0.0193377	9.578	14
	2180	Tb927.9.14160	Tb927.9.14160	RISP	rieske iron-sulfur protein, mitochondrial precursor (RISP)	33.655	45.1	0	175.21	1	1	0.982171	-0.00781283	0.709401	0.149108		33.7	7	7	0.798914	0.930579	-0.0312468	11.076	11	42.4	10	10	0.88413	0.99906	-0.000408429	17.931	15	40.4	10	10	0.94721	1.0191	0.0082168	5.8245	13
	1481	Tb927.5.1520	Tb927.5.1520		heat shock protein HslVU, ATPase subunit HslU, putative	52.53	45.1	0	169.21	1	1	1.01782	0.00767301	0.28918	0.538832		39.6	15	15	0.90082	1.07252	0.030407	10.25	16	45.1	18	18	0.83567	0.98117	-0.00825574	9.7679	24	41.9	18	18	0.92094	1.002	0.000867722	15.873	19
	1231	Tb927.3.1810	Tb927.3.1810		hypothetical protein, conserved	36.117	45.1	0	98.81	1	1	0.983833	-0.00707852	0.743065	0.128973		42	8	8	0.859402	1.0251	0.0107684	5.1659	12	42	8	8	0.86006	0.96827	-0.0140035	5.7484	15	33.1	8	8	0.86626	0.9594	-0.0180003	10.732	13
	1421	Tb927.4.3800	Tb927.4.3800		hypothetical protein, conserved	35.891	45	0	129.27	1	1	1.02609	0.0111846	0.409853	0.387372		31.1	8	1	0.947059	1.12103	0.0496157	21.608	2	35.1	9	0	NaN	NaN		NaN	0	40.1	10	2	0.86839	0.93919	-0.0272465	10.119	2
	2034	Tb927.8.6080	Tb927.8.6080		hypothetical protein, conserved	38.08	45	0	82.301	1	1	1.03226	0.0137889	0.0527481	1.27779		39.3	10	10	0.869112	1.03837	0.0163513	9.2489	10	39.6	10	10	0.89749	1.0101	0.00436437	24.065	11	32.1	8	8	0.96375	1.0487	0.0206513	5.3497	9
	153	Tb927.7.4550;Tb11.v5.0268	Tb927.7.4550;Tb11.v5.0268		60S ribosomal protein-like;60S ribosomal protein-like, putative	19.423	44.8	0	51.116	2	1	0.975192	-0.0109097	0.688098	0.16235		29	2	2	0.800897	0.947598	-0.0233759	9.1307	3	29	2	2	0.79967	0.92095	-0.0357639	4.9448	3	44.8	5	5	0.98128	1.0627	0.0264107	16.102	5
	1964	Tb927.8.3270	Tb927.8.3270		hypothetical protein	21.687	44.8	0	62.888	1		1.00724	0.00313273	0.357437	0.4468		41.3	4	4	0.866476	1.03666	0.0156347	2.1515	6	33.3	3	3	0.89252	1.009	0.00389117	21.671	6	36.8	4	4	0.90116	0.97695	-0.0101277	9.1666	6
	1094	Tb927.11.8870	Tb927.11.8870	KREH1	mitochondrial DEAD box protein,KREH1 (KREH1)	60.659	44.7	0	176.25	1	1	1.01086	0.00469229	0.302051	0.51992		37.2	17	17	0.8296	0.97924	-0.00911077	12.513	21	25.5	13	13	0.92052	1.0411	0.0174924	12.676	16	41.9	21	21	0.9394	1.0132	0.00569518	10.834	24
	251	Tb927.1.2730	Tb927.1.2730		hypothetical protein, conserved	38.735	44.6	0	51.284	1	1	1.04342	0.0184608	0.0910355	1.04079		34.2	8	8	0.895335	1.07426	0.031111	44.435	8	24.9	5	5	0.93403	1.056	0.0236639	7.7659	5	27.4	7	7	0.93449	1.0014	0.000607587	54.596	7
	415	Tb927.10.14840;Tb927.10.14830;Tb927.10.14820	Tb927.10.14840;Tb927.10.14830;Tb927.10.14820	MCP5c;MCP5b;MCP5a	mitochondrial carrier protein (MCP5a);mitochondrial carrier protein (MCP5b);mitochondrial carrier protein,ADP/ATP translocase 1, putative (MCP5c)	34.074	44.6	0	190.94	3	1	1.01043	0.00450603	0.228504	0.641107		34.9	10	10	0.866026	1.02089	0.00897767	13.85	17	44.6	13	13	0.91068	1.023	0.00987563	9.5307	24	42	12	12	0.91078	0.98779	-0.00533537	5.5675	19
	824	Tb927.11.14780	Tb927.11.14780		phosphomannose isomerase, putative	46.482	44.5	0	156.59	1		0.977699	-0.00979491	0.903534	0.0440557		41.8	16	16	0.827815	0.987654	-0.00539504	5.9712	24	42.3	17	17	0.84664	0.95521	-0.0199011	6.345	22	37.4	15	15	0.92325	0.99063	-0.00408852	10.238	21
	255	Tb927.1.3010	Tb927.1.3010		mRNA processing protein, putative	40.813	44.4	0	80.456	1	1	1.00179	0.000777116	0.434272	0.362238		29	7	7	0.851354	1.02013	0.00865424	5.5587	8	32.5	7	7	0.87087	0.98766	-0.00539253	21.42	8	37.6	10	10	0.92097	0.99786	-0.000930386	15.767	11
	896	Tb927.11.1710	Tb927.11.1710	GBP21	mitochondrial RNA binding protein 1,gBP21, MRP1 (GBP21)	23.253	44.2	0	47.353	1	1	0.964405	-0.0157404	0.872695	0.0591377		30.1	7	7	0.832986	0.994827	-0.00225248	22.092	11	19.9	4	4	0.82003	0.92222	-0.0351655	19.344	6	44.2	10	10	0.90856	0.97768	-0.00980327	10.93	13
	989	Tb927.11.5050	Tb927.11.5050	FHm	fumarate hydratase, class I (FHm)	61.344	44.1	0	126.11	1	1	0.999338	-0.000287756	0.504791	0.296888		35.3	15	15	0.924642	1.1003	0.0415127	17.244	20	29.5	13	13	0.82274	0.93828	-0.0276675	11.547	15	40.7	17	17	0.90123	0.9667	-0.0147083	14.198	19
	149	Tb927.11.7290;Tb11.v5.0254	Tb927.11.7290;Tb11.v5.0254		pantothenate kinase subunit, putative;pantothenate kinase subunit, putative	162.1	44	0	323.31	2	1	1.00198	0.000860399	0.470904	0.327067		30.9	31	31	0.829256	0.958681	-0.0183259	7.4241	42	37.1	33	33	0.89537	1.0077	0.00333126	10.888	43	32.4	34	34	0.96379	1.0413	0.0175759	8.4258	41
	170	Tb927.10.540;Tb11.v5.0414	Tb927.10.540;Tb11.v5.0414		ATP-dependent DEAD/H RNA helicase, putative,DEAD box RNA helicase, putative;ATP-dependent DEAD/H RNA helicase, putative	49.226	44	0	76.962	2		0.974318	-0.0112991	0.952291	0.0212302		30.3	11	11	0.805607	0.959325	-0.0180344	9.7696	13	41.7	15	15	0.86462	0.97533	-0.0108484	7.2066	18	26.1	12	12	0.92213	0.98852	-0.00501454	11.801	17
	1925	Tb927.8.1910	Tb927.8.1910	ArgE	acetylornithine deacetylase, putative,metallo-peptidase, Clan MH, Family M18 (ArgE)	43.269	43.9	0	125.86	1		1.01176	0.00507729	0.1727	0.762707		43.9	15	15	0.829119	0.992654	-0.00320197	10.481	19	42.9	13	13	0.90633	1.0224	0.00962084	7.5317	18	43.9	14	14	0.93487	1.0205	0.00881301	12.627	18
	449	Tb927.10.180	Tb927.10.180		ATP synthase F1 subunit gamma protein, putative	34.37	43.9	0	162.2	1	1	1.0103	0.00444832	0.359594	0.444188		37.4	8	8	0.8992	1.06155	0.02594	8.4714	12	29.8	6	6	0.87241	0.98435	-0.00685045	3.8226	9	32.8	8	8	0.91296	0.98686	-0.00574445	14.692	12
	617	Tb927.10.760	Tb927.10.760		hypothetical protein, conserved	29.887	43.8	0	42.602	1	1	1.08199	0.0342223	0.0824271	1.08393		39.1	7	7	0.933184	1.11608	0.0476969	17.861	9	39.8	7	7	0.89356	1.0057	0.00246845	8.1478	8	31	6	6	1.041	1.1285	0.0525016	26.455	7
	769	Tb927.11.13180	Tb927.11.13180		hypothetical protein conserved	61.21	43.6	0	323.31	1		0.995617	-0.00190765	0.688549	0.162065		35.4	12	12	0.835213	0.996115	-0.00169048	10.256	18	37	14	14	0.87115	0.98231	-0.00775143	9.6782	27	39.8	15	15	0.93332	1.0086	0.00371896	14.113	27
	1573	Tb927.5.960;Tb927.3.3280	Tb927.5.960	VPS4	hypothetical protein, conserved	37.159	43.6	0	83.04	2		0.989105	-0.00475768	0.802312	0.0956567		43.6	12	12	0.828775	0.992753	-0.00315884	8.2848	13	43.6	12	12	0.86262	0.97027	-0.0131074	8.4703	15	36.7	10	10	0.91755	1.0046	0.00199317	9.6309	11
	2037	Tb927.8.6170	Tb927.8.6170	TK	transketolase, putative (TK)	72.609	43.6	0	313.87	1		1.00452	0.00195835	0.446427	0.350249		35.9	19	19	0.892777	1.06389	0.0268951	20.518	24	38.1	19	19	0.84971	0.96407	-0.0158914	7.6944	28	41.3	21	21	0.91869	0.98826	-0.00512878	11.509	29
	1354	Tb927.4.1020	Tb927.4.1020		serine-palmitoyl-CoA transferase, putative	54.128	43.5	0	81.736	1		1.00573	0.00248006	0.398881	0.399157		33.9	11	11	0.851281	1.01559	0.00671799	18.616	14	33.7	13	13	0.92236	1.0342	0.0146045	25.173	19	30.4	11	11	0.89456	0.96854	-0.0138824	10.032	14
	1974	Tb927.8.3690	Tb927.8.3690	IDH	isocitrate dehydrogenase [NADP], mitochondrial precursor, putative (IDH)	48.565	43.5	0	72.883	1	1	0.984444	-0.00680889	0.677636	0.169003		25.6	10	9	0.873057	1.03375	0.0144164	22.27	9	37.5	13	12	0.87354	0.98755	-0.00544091	14.625	12	28.8	10	10	0.85684	0.93454	-0.0294021	9.2959	12
	1599	Tb927.6.2010	Tb927.6.2010		hypothetical protein, conserved	58.952	43.4	0	150.85	1	1	1.01466	0.00631942	0.305633	0.5148		32.7	12	12	0.823316	0.978091	-0.00962083	26.85	15	38.6	14	14	0.89157	1.0051	0.00220927	9.4169	20	26.2	10	10	0.99094	1.0626	0.0263698	7.3474	10
	1525	Tb927.5.3350	Tb927.5.3350		iron superoxide dismutase, putative	26.824	43.3	0	204.57	1	1	0.970456	-0.0130241	0.744157	0.128335		29	6	6	0.790202	0.905223	-0.0432443	26.623	10	35.7	7	7	0.85043	0.97901	-0.00921287	11.518	13	43.3	9	9	0.94988	1.0313	0.013385	15.565	13
	504	Tb927.10.3380;Tb927.10.3370	Tb927.10.3380;Tb927.10.3370		60S acidic ribosomal protein P2, putative;60S acidic ribosomal protein P2, putative	11.535	43	0	3.6506	2		1.01814	0.00780556	0.394732	0.403697		7.9	1	1	0.811096	0.969932	-0.0132587	NaN	1	43	2	2	1.0051	1.145	0.0588055	19.765	2	43	2	2	0.87471	0.95032	-0.0221301	7.2814	2
	640	Tb927.10.8430	Tb927.10.8430		40S ribosomal protein S12, putative	16.061	43	0	172.78	1		1.02681	0.011489	0.227249	0.643498		30.3	3	3	0.832847	1.0032	0.00138752	61.914	5	35.2	3	3	0.96272	1.0872	0.0363094	4.3041	4	30.3	3	3	0.91691	0.99259	-0.0032301	3.4865	4
	2238	Tb927.9.4210;Tb11.v5.0561	Tb927.9.4210;Tb11.v5.0561	ACS3	fatty acyl CoA synthetase 3 (ACS3);fatty acyl CoA synthetase, putative	77.853	43	0	273.78	2		1.01676	0.007219	0.166186	0.779405		33	20	2	0.852951	1.02472	0.0106035	1.4158	3	40.2	21	3	0.8784	0.99109	-0.00388691	2.8255	3	33.9	22	4	0.95325	1.035	0.0149403	10.299	4
	1725	Tb927.7.1600	Tb927.7.1600		C-1-tetrahydrofolate synthase, cytoplasmic, putative	31.931	43	0	40.887	1	1	1.02924	0.0125177	0.257041	0.589998		15.1	3	3	0.914662	1.09463	0.0392677	18.298	3	30.9	5	5	0.85683	0.96424	-0.0158149	19.912	5	25.5	6	6	0.94573	1.033	0.0141003	54.827	6
	1688	Tb927.6.4990	Tb927.6.4990		ATP synthase, epsilon chain, putative	20.147	42.9	0	86.367	1	1	1.02068	0.00888978	0.216544	0.664455		42.9	6	6	0.892538	1.0621	0.0261658	13.149	12	42.9	6	6	0.87973	0.9888	-0.00489154	6.1482	12	42.9	6	6	0.93217	1.0125	0.00539503	3.6072	12
	1602	Tb927.6.2140	Tb927.6.2140		hypothetical protein, conserved	28.771	42.7	0	133.01	1	1	0.949645	-0.0224387	0.829094	0.081396		30.3	6	6	0.819336	0.980488	-0.00855758	8.191	8	38.6	6	6	0.77886	0.87413	-0.058424	8.7484	6	42.7	8	8	0.92276	0.99923	-0.000334536	8.9111	13
	749	Tb927.11.12230	Tb927.11.12230		heat shock protein HslVU, ATPase subunit HslU, putative,ATP-dependent hsl protease ATP-binding subunit hslU, putative	54.897	42.7	0	163.78	1	1	0.993571	-0.00280101	0.639325	0.194278		37.1	16	16	0.825764	0.977804	-0.00974823	7.5812	18	38.5	17	17	0.85739	0.97835	-0.00950575	8.6818	21	40.3	16	16	0.93662	1.0253	0.010851	22.004	20
	500	Tb927.10.3260;Tb11.v5.0825	Tb927.10.3260		Long-chain-fatty-acid--CoA ligase 5 (EC 6.2.1.3) (Long-chain acyl-CoA synthetase 5) (LACS 5), putative	78.983	42.7	0	240.28	2		0.983999	-0.00700521	0.958736	0.0183008		34.3	18	18	0.845023	0.99167	-0.00363282	12.252	21	32.1	16	16	0.8715	0.9854	-0.00638744	10.119	22	34.1	19	19	0.90838	0.975	-0.0109954	10.809	22
	2024	Tb927.8.5780	Tb927.8.5780		phosphatase of regenerating liver-type phosphatase, putative	19.422	42.6	0	30.191	1		1.01539	0.00663393	0.190716	0.719614		35.2	4	4	0.869187	1.03553	0.0151623	15.303	5	42.6	5	5	0.87507	0.98892	-0.00483884	6.374	6	35.2	4	4	0.95354	1.0223	0.00957836	11.77	4
	2328	Tb927.9.9660	Tb927.9.9660	ATOM40	hypothetical protein, conserved	38.295	42.5	0	207.68	1	1	1.01546	0.00666288	0.181732	0.74057		28.5	6	6	0.87604	1.04233	0.0180048	3.5839	9	27.1	6	6	0.87546	0.99968	-0.000138996	11.282	9	42.5	11	11	0.92195	1.0049	0.00212285	9.3495	15
	2211	Tb927.9.2320	Tb927.9.2320		hypothetical protein, conserved	41.498	42.5	0	90.051	1		0.990372	-0.00420174	0.771501	0.112664		23.4	8	8	0.847961	1.01096	0.00473354	4.3183	10	35.1	11	11	0.87355	0.98444	-0.00681075	4.934	10	29.4	10	10	0.89474	0.97605	-0.0105279	4.7446	13
	1489	Tb927.5.1780	Tb927.5.1780		hypothetical protein, conserved	48.192	42.4	0	151.34	1		0.986512	-0.00589768	0.838283	0.0766091		29.3	9	9	0.833681	1.00292	0.00126543	9.0339	10	35.3	11	11	0.86055	0.96759	-0.0143086	27.543	14	40.3	12	12	0.91275	0.98935	-0.00465004	7.7097	14
	1057	Tb927.11.6980	Tb927.11.6980		hypothetical protein, conserved	68.158	42.2	0	145.48	1	1	1.01353	0.00583484	0.0546975	1.26203		31.5	14	14	0.848464	1.00895	0.00386921	11.771	17	30.8	12	12	0.90356	1.0234	0.0100454	36.998	15	28.8	14	14	0.90137	1.0083	0.00358977	9.5448	18
	2303	Tb927.9.8130;Tb927.9.8100	Tb927.9.8130;Tb927.9.8100		nascent polypeptide associated complex subunit, putative;nascent polypeptide associated complex subunit, putative	20.129	42	0	64.899	2		1.04452	0.0189186	0.475947	0.322441		23.9	2	2	2.65513	3.11052	0.492833	140.79	2	7.4	1	1	0.30045	0.33958	-0.469058	57.865	2	42	3	3	1.002	1.0789	0.0329812	68.778	3
	1754	Tb927.7.2660	Tb927.7.2660	ZC3H20	zinc finger protein family member, putative (ZC3H20)	43.757	42	0	53.417	1		1.04902	0.0207847	0.332711	0.477933		28.4	8	4	0.746213	0.886839	-0.0521551	6.0909	4	20.7	4	2	1.0916	1.2336	0.0911744	14.356	2	36.3	10	6	0.97821	1.0552	0.0233348	16.817	6
	791	Tb927.11.13750	Tb927.11.13750	RAB4	small GTPase, putative,ras-related rab-4 (RAB4)	22.057	41.9	0	8.4013	1		1.15012	0.0607448	0.127346	0.895015		18.7	3	2	0.823452	0.969368	-0.0135113	12.646	2	18.7	3	2	1.1496	1.3032	0.115011	20.1	2	36.4	5	4	1.1275	1.2043	0.0807347	5.0775	4
	1474	Tb927.5.1240	Tb927.5.1240		hypothetical protein, conserved	39.438	41.8	0	88.562	1	1	1.02515	0.0107888	0.420026	0.376724		27.8	5	5	0.801603	0.936242	-0.0286119	14.01	5	39.2	7	7	1.1262	1.2722	0.104555	25.563	8	36.1	7	7	0.83694	0.90453	-0.043577	6.9071	8
	709	Tb927.11.10910;Tb927.11.10790	Tb927.11.10910;Tb927.11.10790		40S ribosomal protein SA, putative;40S ribosomal protein SA, putative	27.609	41.8	0	71.961	2		1.00303	0.00131356	0.472281	0.325799		38.9	7	7	0.832986	1.00233	0.0010129	13.045	7	38.9	7	7	0.952	1.0726	0.0304378	12.647	8	41.8	8	8	0.86628	0.93862	-0.0275102	15.645	9
	339	Tb927.10.12240	Tb927.10.12240		short-chain dehydrogenase, putative	36.075	41.6	0	147.97	1		1.07403	0.0310179	0.143339	0.843636		29.7	5	5	0.901876	1.07552	0.0316197	52.53	8	36.4	6	6	0.86819	0.98491	-0.00660345	11.608	10	22.9	4	4	1.0871	1.1696	0.0680374	15.546	4
	1390	Tb927.4.2450	Tb927.4.2450		thioredoxin, putative	44.49	41.6	0	254.08	1		0.990432	-0.0041755	0.668398	0.174965		39.9	10	10	0.794913	0.953562	-0.0206512	33.415	15	37.2	9	9	0.89896	1.0073	0.00315883	11.494	16	41.6	11	11	0.93866	1.0115	0.00496589	29.257	16
	915	Tb927.11.2470	Tb927.11.2470		aminopeptidase, putative,metallo-peptidase, Clan MF, Family M17	60.585	41.4	0	115.23	1		1.02278	0.00978214	0.107795	0.967403		26	8	8	0.847242	1.01853	0.00797255	5.9773	8	29.6	10	10	0.92955	1.0472	0.0200296	7.8139	14	38.8	12	12	0.92545	1.0031	0.00134423	6.9803	14
	1605	Tb927.6.2170	Tb927.6.2170		co-chaperone GrpE, putative	23.877	41.4	0	35.828	1	1	0.985846	-0.00619095	0.88355	0.0537691		29.3	6	6	0.835352	0.990688	-0.00406332	8.2232	8	29.3	6	6	0.88405	0.99727	-0.00118725	11.525	9	41.4	9	9	0.90598	0.96979	-0.0133223	5.0486	12
	1063	Tb927.11.7380	Tb927.11.7380		glycerol-3-phosphate dehydrogenase (FAD-dependent), mitochondrial	66.991	41.3	0	219.95	1	1	0.973766	-0.0115455	0.753245	0.123064		34.7	15	15	0.818867	0.980969	-0.00834463	11.945	18	37.5	17	17	0.81565	0.91821	-0.037058	8.0086	25	34.2	14	14	0.95694	1.0251	0.0107662	7.9428	19
	219	Tb11.v5.0807;Tb927.9.13510	Tb11.v5.0807;Tb927.9.13510	parn3	ribonuclease, putative;Poly(A)-specific ribonuclease PARN-3	64.261	41.3	0	223.55	2		1.00789	0.00341349	0.373985	0.427146		35.9	12	12	0.837872	0.980008	-0.00877047	14.241	15	32.2	12	12	0.93078	1.051	0.0216027	16.088	15	36.2	15	15	0.9184	0.99405	-0.00259177	9.2595	16
	1092	Tb927.11.880	Tb927.11.880	CYPA	cyclophilin a,cyclophilin type peptidyl-prolyl cis-trans isomerase (CYPA)	18.717	41.2	0	23.396	1		1.02732	0.0117051	0.329465	0.482191		21.5	3	3	0.806452	0.941797	-0.0260427	21.438	3	33.3	5	5	0.99822	1.1292	0.0527709	13.48	6	29.4	4	4	0.94757	1.0195	0.00838723	9.1694	4
	865	Tb927.11.1620	Tb927.11.1620		hypothetical protein, conserved	21.598	41.1	0	30.753	1	1	1.06579	0.0276711	0.0516656	1.2868		41.1	5	5	0.891902	1.06175	0.0260227	17.87	7	29.7	4	4	0.90986	1.0276	0.0118241	9.3755	7	41.1	5	5	1.0298	1.1096	0.0451664	20.587	6
	1765	Tb927.7.2980;Tb927.7.3020	Tb927.7.2980;Tb927.7.3020		hypothetical protein, conserved;hypothetical protein, conserved	21.242	41.1	0	109.85	2	1	1.03311	0.0141474	0.233281	0.63212		41.1	6	6	0.806387	0.960522	-0.0174925	13.796	8	35.3	5	5	0.94229	1.0764	0.0319737	10.822	11	41.1	6	6	0.99577	1.0665	0.0279609	8.6279	8
	1886	Tb927.7.7460	Tb927.7.7460		hypothetical protein, conserved	22.358	41.1	0	12.943	1		0.940543	-0.0266214	0.838548	0.0764723		17.7	3	3	0.730674	0.860067	-0.0654677	86.429	3	18.8	3	3	0.89298	1.0091	0.00393421	25.908	3	29.2	5	5	0.88376	0.95867	-0.0183309	9.0649	5
	1230	Tb927.3.1790	Tb927.3.1790		pyruvate dehydrogenase E1 beta subunit, putative	37.566	41.1	0	119.19	1	1	0.993827	-0.00268906	0.572927	0.241901		30.5	8	8	0.858222	1.01313	0.00566518	16.144	10	33.6	8	8	0.82912	0.93756	-0.0280009	17.113	8	41.1	11	11	0.95933	1.0334	0.0142685	9.8672	11
	1570	Tb927.5.930;Tb11.v5.0613	Tb927.5.930;Tb11.v5.0613	FRDg	NADH-dependent fumarate reductase (FRDg);NADH-dependent fumarate reductase, putative	123.69	41.1	0	306.47	2		0.964009	-0.0159189	0.951695	0.0215021		35.5	27	12	0.826651	0.945716	-0.0242393	16.338	13	36.2	27	11	0.84894	0.96036	-0.0175659	11.406	13	34.9	28	11	0.92248	0.98639	-0.00595134	10.226	12
	991	Tb927.11.5090	Tb927.11.5090		aspartate aminotransferase, mitochondrial	45.993	41	0	56.972	1	1	0.995071	-0.00214606	0.547126	0.261913		29.5	10	10	0.823249	0.976944	-0.0101303	12.42	12	36.7	10	10	0.8398	0.94397	-0.0250418	12.64	10	25.2	8	8	0.99066	1.0684	0.0287339	12.933	9
	129	Tb927.7.4770;Tb11.v5.0160	Tb927.7.4770;Tb11.v5.0160	PPIase	cyclophilin-type peptidyl-prolyl cis-trans isomerase, putative (PPIase);cyclophilin-type peptidyl-prolyl cis-trans isomerase, putative	18.59	41	0	23.204	2		0.989819	-0.00444415	0.597191	0.223887		31.8	5	5	0.830841	0.991375	-0.00376204	5.7171	6	17.9	3	3	0.82577	0.92844	-0.0322462	6.2315	4	34.1	6	6	0.98249	1.0536	0.0226758	11.137	6
	1166	Tb927.2.3610	Tb927.2.3610		hypothetical protein, conserved	16.06	41	0	41.055	1	1	1.0169	0.00727712	0.174659	0.75781		40.3	5	5	0.885504	1.04242	0.0180411	8.0688	5	26.4	2	2	0.89704	1.0151	0.00650883	9.3911	3	41	5	5	0.91703	0.99376	-0.00271849	10.302	9
	107	Tb927.10.6950;Tb927.10.6910;Tb11.v5.0496;Tb10.v4.0247	Tb927.10.6950;Tb927.10.6910;Tb11.v5.0496;Tb10.v4.0247		sterol 24-c-methyltransferase, putative;Sterol methyltransferase, putative;sterol 24-c-methyltransferase, putative;s-adenosyl-L-methionine-c-24-delta-sterol-methy lt ransferase a, putative,chrX additional, unordered contigs	40.128	40.9	0	103.31	4		0.977507	-0.00987992	0.897225	0.0470988		23.7	7	7	0.821558	0.982415	-0.0077051	7.832	8	38.7	10	10	0.84876	0.95494	-0.0200239	10.127	13	20.6	7	7	0.90912	0.99561	-0.00191075	7.9441	8
	573	Tb927.10.5840	Tb927.10.5840		translation elongation factor 1-beta, putative	21.959	40.8	0	49.986	1		1.00268	0.00116213	0.48458	0.314634		40.8	5	3	0.819403	0.944733	-0.0246909	16.976	3	35.3	4	3	0.82713	0.94136	-0.0262443	10.13	4	40.8	5	3	1.0382	1.1335	0.0544215	7.2869	4
	642	Tb927.10.8630	Tb927.10.8630		hypothetical protein, conserved	27.968	40.8	0	41.619	1		0.965253	-0.0153589	0.756678	0.121089		36.9	6	6	0.763709	0.901551	-0.0450098	14.574	7	22.7	4	4	0.85041	0.95789	-0.0186844	11.727	5	32.5	6	6	0.9623	1.0414	0.0176176	7.4192	7
	1884	Tb927.7.7430;Tb927.7.7420	Tb927.7.7430;Tb927.7.7420		ATP synthase alpha chain, mitochondrial precursor,ATP synthase F1, alpha subunit;ATP synthase alpha chain, mitochondrial precursor,ATP synthase F1, alpha subunit	63.502	40.8	0	201.35	2	1	1.00594	0.00257209	0.279567	0.553514		29.6	17	17	0.848752	1.02167	0.00931064	7.6131	26	37.5	20	20	0.88848	1.0043	0.00186346	7.8544	34	34.2	19	19	0.92317	0.99207	-0.00345768	3.2027	27
	1303	Tb927.3.4530	Tb927.3.4530		hypothetical protein, conserved	26.774	40.8	0	37.587	1		0.868657	-0.0611518	0.986584	0.00586587		31	5	5	0.724638	0.850195	-0.0704812	15.418	6	24.3	3	3	0.80118	0.91048	-0.0407296	25.737	3	29.4	5	5	0.78098	0.84675	-0.0722448	8.6434	5
	1527	Tb927.5.3390	Tb927.5.3390		ADG1, pseudogene	13.175	40.7	0	26.172	1	1	0.999816	-7.99503e-05	0.501163	0.300021		33.9	5	5	0.890472	1.05148	0.021801	10.942	5	9.3	1	1	NaN	NaN		NaN	0	40.7	6	6	0.8783	0.95069	-0.0219611	6.1821	5
	2267	Tb927.9.6170;Tb927.9.6290	Tb927.9.6170;Tb927.9.6290	AK;AK	arginine kinase (AK);arginine kinase (AK)	44.716	40.6	0	165.67	2			NaN				29.5	10	0	NaN	NaN		NaN	0	29.2	9	0	NaN	NaN		NaN	0	37.1	11	1	NaN	NaN		NaN	0
	2020	Tb927.8.5640	Tb927.8.5640		hypothetical protein, conserved	37.089	40.5	0	156.28	1	1	1.00056	0.000245264	0.486763	0.312683		27.3	7	7	0.815594	0.970874	-0.0128372	5.4702	9	36.9	8	8	0.90647	1.017	0.00732095	7.9765	11	27.9	7	7	0.94134	1.0145	0.00625205	17.088	12
	1613	Tb927.6.2420	Tb927.6.2420		p22 protein precursor	25.349	40.5	0	81.928	1	1	1.0049	0.0021236	0.38315	0.416631		28.6	6	6	0.846668	1.00993	0.00429041	20.386	9	35.2	5	5	0.9201	1.0273	0.0116973	5.983	10	20.7	4	4	0.88736	0.9781	-0.00961674	11.933	6
	718	Tb927.11.11120	Tb927.11.11120		hypothetical protein, conserved	22.452	40.4	0	107.31	1	1	1.02071	0.0089034	0.34597	0.460962		25.8	4	4	0.918358	1.08064	0.0336798	12.416	4	25.8	4	4	0.93347	1.0531	0.0224696	8.2538	4	40.4	6	6	0.87089	0.93446	-0.0294393	4.6693	7
	1919	Tb927.8.1820	Tb927.8.1820		nonspecific lipid-transfer protein, putative,sterol carrier protein, putative	43.439	40.3	0	38.086	1	1	0.976431	-0.0103583	0.831045	0.0803752		26.7	7	7	0.844238	1.00846	0.00365911	16.253	7	28.6	7	7	0.86541	0.97792	-0.00969667	14.286	9	19.6	6	6	0.87478	0.94398	-0.0250372	9.5074	7
	301	Tb927.10.1070;Tb927.7.7360	Tb927.10.1070	CRK1;CRK2	cell division protein kinase 2 homolog 1,cdc2- like protein kinase (CRK1)	34.35	40.2	0	40.229	2		1.0083	0.00358978	0.121298	0.916145		22.9	6	6	0.842531	1.01339	0.00577533	3.5037	5	27.6	7	7	0.87334	0.99819	-0.000786785	9.614	6	24.9	7	7	0.93687	1.0134	0.0057809	12.242	7
	2169	Tb927.9.13740;Tb927.9.13710;Tb927.9.13680;Tb927.9.13650	Tb927.9.13740;Tb927.9.13710;Tb927.9.13680;Tb927.9.13650		ADP-ribosylation factor, putative;ADP-ribosylation factor, putative;ADP-ribosylation factor, putative;ADP-ribosylation factor, putative	20.624	40.1	0	49.14	4		1.03079	0.0131692	0.235107	0.628735		28	3	3	0.841609	1.004	0.00173198	28.071	4	30.8	3	3	0.97314	1.1034	0.042733	17.904	4	20.9	3	3	0.91493	0.98865	-0.00495743	23.501	4
	1498	Tb927.5.2080	Tb927.5.2080		guanosine monophosphate reductase, putative	52.238	40.1	0	171.42	1		0.951365	-0.0216527	0.959696	0.0178665		36.7	11	11	0.790451	0.952835	-0.0209824	40.235	16	31.8	9	9	0.86335	0.97576	-0.010657	7.8594	12	40.1	13	13	0.85738	0.92615	-0.0333187	17.396	18
	2051	Tb927.8.6480	Tb927.8.6480		hypothetical protein, conserved	36.943	40.1	0	52.4	1	1	0.987613	-0.00541302	0.630577	0.200262		23.9	5	5	0.859106	1.02726	0.0116821	27.092	5	40.1	9	9	0.89689	1.0129	0.00556657	26.424	11	20.4	5	5	0.86048	0.92579	-0.0334875	4.9985	6
	354	Tb927.10.12700	Tb927.10.12700		pyruvate dehydrogenase E1 alpha subunit, putative	42.511	39.9	0	69.878	1	1	0.989023	-0.00479361	0.706351	0.150979		27.2	7	7	0.842673	1.0117	0.0050496	3.9236	9	29.9	8	8	0.85376	0.95615	-0.019474	4.3461	9	33.6	11	11	0.92292	1.0001	4.34273e-05	11.64	10
	608	Tb927.10.7430	Tb927.10.7430		GTP-binding protein, putative	51.559	39.8	0	95.202	1	1	1.02996	0.0128205	0.175358	0.756075		30.5	9	9	0.834098	0.993838	-0.00268427	7.637	10	29.9	7	7	0.94796	1.0793	0.0331422	19.974	10	25	7	7	0.9447	1.0186	0.00800367	42.455	11
	1168	Tb927.2.3800	Tb927.2.3800		guide RNA associated protein, GAP1,MRB1-associated protein	55.46	39.8	0	251.24	1	1	1.03777	0.0161016	0.18536	0.731984		32.1	11	11	0.887548	1.04793	0.0203331	39.569	16	34.8	13	13	0.95268	1.0916	0.0380635	11.62	17	32.5	12	12	0.88933	0.97703	-0.0100921	23.105	17
	926	Tb927.11.2690	Tb927.11.2690		succinyl-coA:3-ketoacid-coenzyme A transferase, mitochondrial precursor, putative	53.096	39.8	0	142.17	1	1	0.936403	-0.028537	0.957706	0.0187679		17.2	6	6	0.777968	0.906536	-0.0426148	9.4021	8	30.8	10	10	0.82857	0.93142	-0.0308544	8.4569	15	31.6	14	14	0.90422	0.97243	-0.0121417	22.409	20
	1604	Tb927.6.2160	Tb927.6.2160		hypothetical protein, conserved	33.183	39.7	0	85.476	1		0.984772	-0.00666438	0.672857	0.172077		39.3	7	7	0.782289	0.935016	-0.0291808	15.134	9	35.6	7	7	0.85777	0.98646	-0.00592052	9.8724	10	30.5	6	6	0.95421	1.0354	0.0151082	6.1759	8
	2007	Tb927.8.5280	Tb927.8.5280		hypothetical protein, conserved	28.693	39.7	0	35.193	1	1	1.03849	0.0164022	0.162273	0.789752		39.7	6	6	0.864753	1.04049	0.0172358	16.754	8	21	3	3	0.97198	1.0912	0.0379044	11.999	3	35.4	5	5	0.90596	0.98643	-0.00593373	29.91	6
	649	Tb927.10.8940	Tb927.10.8940	KH1	hypothetical protein, conserved	45.398	39.7	0	67.995	1		1.00427	0.0018522	0.349898	0.456059		27.7	6	6	0.864005	1.0199	0.00855674	17.123	6	5.4	1	1	0.86593	0.9868	-0.00577086	NaN	1	29.7	7	7	0.94499	1.0064	0.00277063	33.959	7
	1873	Tb927.7.7080	Tb927.7.7080		mitochondrial glycoprotein-like protein	41.205	39.5	0	119.09	1	1	1.01397	0.00602706	0.115653	0.936843		32.8	8	8	0.846668	1.00263	0.0011394	15.203	10	34.7	8	8	0.91214	1.0302	0.0129215	18.383	9	34.4	7	7	0.93009	1.0093	0.00402027	16.928	9
	2193	Tb927.9.15240	Tb927.9.15240		hypothetical protein, conserved	28.749	39.5	0	40.485	1	1	0.974804	-0.0110827	0.841751	0.0748165		36.3	6	6	0.845166	1.0083	0.00358891	7.0453	7	23	4	4	0.86129	0.974	-0.011441	18.753	4	39.5	7	7	0.88355	0.9432	-0.0253962	13.251	7
	483	Tb927.10.280	Tb927.10.280	COXVI	cytochrome oxidase subunit VI (COXVI)	19.154	39.2	0	29.298	1	1	1.04307	0.0183119	0.193599	0.713096		38.6	5	5	0.80952	0.96637	-0.0148564	6.6617	7	32.9	5	5	0.97004	1.0921	0.0382624	23.117	6	38.6	5	5	1.0042	1.0753	0.0315296	3.0098	6
	1142	Tb927.11.9940	Tb927.11.9940		hypothetical protein, conserved	20.599	39.2	0	30.152	1		0.976145	-0.0104855	0.619658	0.207848		24.2	4	4	0.75466	0.895576	-0.0478977	11.103	6	11.3	2	2	0.82142	0.92772	-0.0325831	19.725	4	34.4	6	6	1.0241	1.1195	0.0490241	24.271	7
	181	Tb927.10.660;Tb11.v5.0500	Tb927.10.660;Tb11.v5.0500		2-oxoisovalerate dehydrogenase alpha subunit, putative;2-oxoisovalerate dehydrogenase alpha subunit, putative	46.369	39.2	0	262.9	2	1	0.998333	-0.000724602	0.559966	0.251839		36.5	14	14	0.826105	0.995025	-0.00216605	33.032	18	30.8	9	9	0.86667	0.98346	-0.0072433	19.509	13	39.2	15	15	0.93985	1.0168	0.00723554	15.285	17
	805	Tb927.11.14100	Tb927.11.14100	DRBD4	DRBD4 (DRBD4)	54.707	39.2	0	160.21	1		0.977845	-0.00972998	0.964858	0.0155368		31.7	10	10	0.803794	0.968711	-0.0138059	7.7554	15	30.7	9	9	0.86149	0.97538	-0.0108262	8.4141	13	37	13	13	0.91174	0.98956	-0.00455787	6.6651	19
	2069	Tb927.8.7040	Tb927.8.7040		hypothetical protein, conserved	21.365	39.2	0	79.055	1	1	1.0161	0.00693617	0.0934814	1.02927		36	7	7	0.850123	1.0171	0.00736237	14.208	9	36	7	7	0.91675	1.0299	0.0127951	10.369	10	38.6	7	7	0.91989	1.0015	0.000650954	30.953	9
	1302	Tb927.3.4500;Tb11.v5.0629	Tb927.3.4500;Tb11.v5.0629	FHc	fumarate hydratase, class I (FHc);fumarate hydratase, putative	62.262	39.1	0	149.88	2		1.00729	0.00315417	0.450404	0.346397		25.7	11	11	0.972479	1.11545	0.0474497	10.897	11	24.8	9	9	0.8392	0.94516	-0.0244947	32.92	11	34.7	16	16	0.88908	0.96941	-0.0134925	15.092	14
	1288	Tb927.3.3890	Tb927.3.3890		hypothetical protein, conserved	36.68	39.1	0	38.738	1	1	1.01055	0.00455568	0.120692	0.918321		27.5	6	6	0.85034	1.01453	0.00626404	21.697	7	30.9	6	6	0.88528	0.99803	-0.000856404	12.823	10	21.6	6	6	0.93233	1.0192	0.00825941	7.6146	5
	1785	Tb927.7.3500	Tb927.7.3500		glutathione-S-transferase/glutaredoxin, putative	35.436	39.1	0	94.209	1	1	0.957576	-0.0188268	0.863008	0.063985		21.2	3	3	0.791264	0.93985	-0.0269416	1.4875	4	29.2	5	5	0.88788	1.0137	0.00590945	12.166	8	39.1	8	8	0.84578	0.92162	-0.0354481	22.715	12
	1177	Tb927.2.4240	Tb927.2.4240		GTP binding protein, putative	40.685	39	0	135.75	1	1	1.01536	0.00662093	0.224194	0.649376		34.6	10	10	0.870701	1.04239	0.0180319	7.5424	12	35.7	9	9	0.87267	0.9855	-0.00634337	14.577	11	34.3	9	9	0.94845	1.019	0.00817418	8.6672	12
	1556	Tb927.5.520	Tb927.5.520		stomatin-like protein, putative	55.979	39	0	306.36	1	1	0.975243	-0.0108872	0.835111	0.0782556		32.8	13	13	0.821153	0.980873	-0.00838722	5.7659	20	36	15	15	0.83128	0.94028	-0.0267428	17.952	21	39	18	18	0.91965	1.0057	0.00246845	10.848	27
	1448	Tb927.4.5040	Tb927.4.5040		dihydrolipoamide dehydrogenase, putative	66.008	39	0	182.74	1	1	0.959172	-0.0181034	0.907395	0.0422036		32.4	15	15	0.831601	0.9997	-0.000130264	15.199	16	23	11	11	0.83718	0.94511	-0.0245176	15.693	13	35.2	16	16	0.86199	0.93398	-0.0296624	12.045	17
	2239	Tb927.9.4230	Tb927.9.4230	ACS4	fatty acyl CoA synthetase 4 (ACS4)	77.871	38.9	0	39.572	1		1.02507	0.0107546	0.400635	0.397251		28.1	18	1	0.735835	0.884643	-0.0532321	NaN	1	35.9	19	1	0.90644	1.0206	0.00885556	NaN	1	27.2	19	2	1.0999	1.193	0.0766404	16.157	2
	797	Tb927.11.13910	Tb927.11.13910		hypothetical protein, conserved	28.921	38.9	0	31.889	1	1	1.03811	0.0162433	0.169632	0.770491		17.4	4	4	0.838364	0.992457	-0.00328813	12.911	4	27.5	5	5	0.90615	1.0257	0.0110204	33.061	5	15.5	4	4	1.0195	1.099	0.0409977	30.754	4
	666	Tb927.10.9560	Tb927.10.9560		oxidoreductase, putative	36.099	38.9	0	123.29	1		1.0104	0.00449272	0.36046	0.443143		31.1	6	6	0.829531	0.981162	-0.00825941	9.6976	7	27.8	6	6	0.87888	0.98967	-0.00450959	9.0371	8	38.6	7	7	0.99562	1.0623	0.0262472	10.067	9
	1833	Tb927.7.5480	Tb927.7.5480	DHFR-TS	dihydrofolate reductase-thymidylate synthase (DHFR-TS)	58.85	38.7	0	131.66	1	1	0.983475	-0.00723658	0.901214	0.0451722		24.3	11	11	0.826788	0.987362	-0.00552368	16.653	12	24.3	9	9	0.85891	0.96713	-0.0145151	11.724	10	31.5	15	15	0.92224	0.99616	-0.0016709	9.5233	18
	1783	Tb927.7.3440;Tb927.7.3450	Tb927.7.3440		I/6 autoantigen	27.05	38.6	0	175.8	2		1.0239	0.0102583	0.184662	0.733622		38.6	5	5	0.834098	0.99681	-0.00138757	13.251	7	38.6	5	5	0.89723	1.0101	0.00436437	8.2613	8	38.6	5	5	0.98369	1.0661	0.0277979	9.3062	7
	2041	Tb927.8.6250	Tb927.8.6250		hypothetical protein, conserved	75.474	38.6	0	191.03	1		1.01042	0.00450057	0.395361	0.403006		26.8	14	14	0.824334	0.957121	-0.0190332	10.536	19	21.7	10	10	0.88695	1.0012	0.000520841	32.933	13	36	21	21	0.97316	1.0765	0.032014	13.799	26
	441	Tb927.10.15790	Tb927.10.15790		hypothetical protein, conserved	16.775	38.6	0	12.34	1	1	1.00644	0.00278804	0.442626	0.353963		18.6	2	2	0.846812	0.938879	-0.0273904	3.2825	2	16.6	2	2	0.95828	1.0757	0.0316912	8.3801	2	21.4	2	2	0.91951	1.0094	0.0040633	7.0923	2
	2226	Tb927.9.3280	Tb927.9.3280		acidocalcisomal exopolyphosphatase	42.865	38.6	0	91.342	1		0.998535	-0.00063663	0.528832	0.276683		34.2	11	11	0.8142	0.969932	-0.0132587	6.4493	13	30.3	11	11	0.91353	1.0318	0.0135955	11.677	13	28.7	10	10	0.92567	0.99484	-0.00224676	5.2875	11
	1497	Tb927.5.2070	Tb927.5.2070		hypothetical protein, conserved	68.756	38.5	0	227.8	1	1	0.986098	-0.00608002	0.812336	0.0902642		36	15	15	0.846095	1.01045	0.00451397	12.212	19	30.8	13	13	0.86555	0.97062	-0.0129508	31.597	18	34.1	15	15	0.90351	0.97768	-0.00980327	9.1121	21
	455	Tb927.10.1950	Tb927.10.1950		leucine-rich repeat protein (LRRP), putative	77.026	38.4	0	152.65	1	1	1.0235	0.0100885	0.224939	0.647935		33.5	18	18	0.859845	1.01773	0.00763215	15.768	22	34.5	18	18	0.94946	1.0714	0.0299516	13.175	21	35	19	19	0.89249	0.98329	-0.00731838	16.796	25
	440	Tb927.10.15760	Tb927.10.15760		hypothetical protein, conserved	36.411	38.4	0	112.94	1		0.993622	-0.00277858	0.650159	0.186981		16.2	3	3	0.838926	0.998802	-0.000520814	18.178	4	26.3	4	4	0.85726	0.96708	-0.0145376	3.7974	8	38.4	10	10	0.92313	1.0156	0.00672269	17.806	15
	1395	Tb927.4.2700	Tb927.4.2700		hydroxymethylglutaryl-CoA synthase, putative	47.272	38.3	0	137.06	1	1	0.986386	-0.00595291	0.6473	0.188894		7	2	2	0.776759	0.926355	-0.0332226	14.261	2	22.3	7	7	0.90695	1.0149	0.00642325	7.1243	7	31.1	9	9	0.93871	1.0208	0.00894066	23.131	10
	2268	Tb927.9.6230	Tb927.9.6230	AK	unspecified product (AK)	41.597	38.1	0.0092065	1.7886	1		1.00773	0.00334548	0.205563	0.687055		32.2	10	0	NaN	NaN		NaN	0	34.1	10	1	0.89582	1.0136	0.0058666	NaN	1	34.3	11	1	0.93587	1.0019	0.000824377	NaN	1
	1934	Tb927.8.2240	Tb927.8.2240	TrpRS-2	Tryptophanyl-tRNA synthetase 2	52.902	38.1	0	62.47	1	1	0.983573	-0.00719322	0.75005	0.12491		27.7	10	10	0.813802	0.9739	-0.0114859	12.243	11	28.3	9	9	0.90924	1.0227	0.00974826	19.705	10	27.9	10	10	0.88707	0.95534	-0.019842	11.975	12
	1369	Tb927.4.1670	Tb927.4.1670		hypothetical protein, conserved	17.389	37.9	0	66.23	1	1	1.03055	0.0130683	0.405516	0.391992		32.7	3	3	0.871612	0.890313	-0.0504571	16.082	3	29.4	3	3	0.85147	0.9604	-0.0175478	7.654	3	9.2	1	1	1.1813	1.28	0.10721	NaN	1
	1554	Tb927.5.4350	Tb927.5.4350		NUDIX hydrolase, putative	19.639	37.6	0	12.379	1		0.984176	-0.00692731	0.652154	0.18565		5.9	1	1	0.792456	0.957579	-0.0188253	NaN	1	31.8	4	4	0.83362	0.94307	-0.0254561	75.043	4	5.9	1	1	0.98175	1.0556	0.0234994	NaN	1
	1571	Tb927.5.940	Tb927.5.940		NADH-dependent fumarate reductase, putative	87.388	37.6	0	20.857	1		1.00923	0.00399202	0.34621	0.460661		30.1	16	2	0.808407	0.97012	-0.0131744	0.52341	2	35.8	18	3	0.91707	1.036	0.0153598	11.496	3	33.9	19	3	0.94197	1.0228	0.00979072	7.8829	3
	1516	Tb927.5.3010;Tb11.v5.0691	Tb927.5.3010;Tb11.v5.0691	mrb3010	MRB1-associated protein, putative,guide RNA binding protein, putative;hypothetical protein, conserved	57.748	37.6	0	75.038	2	1	0.979112	-0.00916772	0.735482	0.133428		26.2	13	13	0.774593	0.93214	-0.0305188	26.363	15	27.1	11	11	0.90725	1.0269	0.0115282	15.454	13	26.4	13	13	0.91148	0.98059	-0.00851254	13.999	16
	2159	Tb927.9.13040	Tb927.9.13040		hypothetical protein, conserved	46.219	37.6	0	179.44	1	1	1.00171	0.000743304	0.478863	0.319789		23.4	6	6	0.885112	1.05476	0.0231549	14.831	8	31.8	7	7	0.84973	0.95555	-0.0197466	34.033	10	24.1	6	6	0.9288	0.99729	-0.00117854	16.868	9
	347	Tb927.10.12500	Tb927.10.12500		P-type H -ATPase, putative	100.23	37.5	0	203.75	1		1.2627	0.1013	0.226528	0.644879		22.6	19	2	1.73524	2.09179	0.320518	NaN	1	30.3	21	5	0.86013	0.97114	-0.0127182	12.479	9	27.5	21	5	0.91881	0.99106	-0.00390005	15.576	6
	726	Tb927.11.11390	Tb927.11.11390		hypothetical protein, conserved	30.964	37.5	0	48.249	1		0.969649	-0.0133856	0.890489	0.0503715		32	7	7	0.83675	0.967961	-0.0141424	17.047	7	37.5	8	8	0.87529	1.0002	8.68502e-05	5.6271	8	32	7	7	0.85545	0.94167	-0.0261013	7.1242	7
	959	Tb927.11.3900	Tb927.11.3900		glycosyltransferase family-like protein, putative	31.198	37.5	0	46.078	1	1	0.980744	-0.00844427	0.770144	0.113428		19.3	5	5	0.84674	1.02008	0.0086321	4.5094	5	26.5	6	6	0.86793	0.97589	-0.0105991	13.232	7	24.7	6	6	0.87557	0.94762	-0.0233658	19.782	8
	2245	Tb927.9.4680	Tb927.9.4680		ATP-dependent DEAD box helicase, putative	45.361	37.4	0	42.766	1		1.01759	0.00757286	0.317932	0.497666		18.6	6	6	0.801282	0.95648	-0.0193241	33.878	7	27.2	7	7	0.92338	1.0388	0.0165319	5.5031	9	22.3	8	8	0.98304	1.0605	0.0255107	17.111	9
	2083	Tb927.8.7770	Tb927.8.7770		hypothetical protein, conserved	60.341	37.4	0	198.99	1	1	0.945592	-0.0242962	0.88645	0.0523459		31.3	10	10	0.847529	1.00144	0.000625802	17.835	11	27	8	8	0.83952	0.94338	-0.0253133	7.6146	12	26.1	8	8	0.8325	0.89495	-0.0482012	6.2788	10
	1971	Tb927.8.3530	Tb927.8.3530		glycerol-3-phosphate dehydrogenase [NAD ], glycosomal	37.805	37.3	0	85.549	1		0.972117	-0.0122816	0.97725	0.0099945		33.1	9	9	0.823859	0.983284	-0.00732094	5.2174	14	33.1	9	9	0.86646	0.97083	-0.0128568	8.4212	14	35	10	10	0.89553	0.96235	-0.0166669	13.944	15
	1607	Tb927.6.2220	Tb927.6.2220		hypothetical protein, conserved	14.871	37.2	0	12.234	1		0.922246	-0.0351531	0.781436	0.107107		12.4	1	1	0.707163	0.840336	-0.075547	NaN	1	25.6	2	2	0.76793	0.85582	-0.0676176	10.414	2	37.2	3	3	1.0174	1.0907	0.0377053	37.125	2
	429	Tb927.10.15410	Tb927.10.15410	gMDH	glycosomal malate dehydrogenase (gMDH)	33.71	37.2	0	127.17	1		0.980997	-0.00833213	0.792853	0.100808		30.3	10	10	0.797321	0.945895	-0.0241572	2.3518	14	37.2	10	10	0.88175	1.0069	0.00298634	4.3448	14	36.8	9	9	0.9168	0.99123	-0.00382556	21.425	14
	775	Tb927.11.13280	Tb927.11.13280	GBP25	mitochondrial RNA binding protein 2 (GBP25)	25.106	37.1	0	60.339	1	1	1.00044	0.000189059	0.472501	0.325598		37.1	6	6	0.834585	1.00316	0.00137021	7.161	9	37.1	6	6	0.87544	0.98974	-0.00447888	19.232	9	37.1	6	6	0.93487	1.0085	0.0036759	5.7046	10
	1046	Tb927.11.6590;Tb11.v5.0360	Tb927.11.6590		aminopeptidase, putative,metallo-peptidase, Clan MF, Family M17	55.359	37	0	120.71	2		1.00031	0.00013321	0.492652	0.30746		28.4	9	9	0.860289	1.02589	0.0111025	11.664	12	29.4	8	8	0.86449	0.97478	-0.0110934	10.874	10	35.3	10	10	0.93064	1.0009	0.000390689	9.7785	13
	1675	Tb927.6.4500	Tb927.6.4500		hypothetical protein, conserved	22.705	36.9	0	66.03	1		0.996483	-0.0015302	0.546806	0.262167		33	5	5	0.796622	0.955475	-0.0197807	3.3273	5	33	5	5	0.87444	0.98958	-0.00454909	9.5178	5	36.9	6	6	0.96592	1.0465	0.0197392	6.7532	7
	571	Tb927.10.5820	Tb927.10.5820		predicted RanGDP binding protein	109.23	36.9	0	300.97	1		0.979137	-0.0091564	0.757685	0.120512		20	14	14	0.774833	0.932314	-0.0304378	15.751	15	21.2	12	12	0.88479	1.01	0.00432137	25.121	12	32.5	23	23	0.93162	0.99689	-0.00135276	9.5767	27
	520	Tb927.11.14130;Tb927.10.3840	Tb927.11.14130;Tb927.10.3840		ribosomal protein L18, putative;60S ribosomal protein L18a, putative	20.904	36.9	0	28.234	2		0.97392	-0.0114766	0.739311	0.131173		36.9	5	5	0.783024	0.93301	-0.0301137	3.3364	6	24.6	3	3	0.92407	1.0422	0.0179511	8.147	4	20.1	3	3	0.87772	0.95002	-0.0222673	4.8758	3
	2210	Tb927.9.2270	Tb927.9.2270		hypothetical protein, conserved	78.354	36.9	0	254.37	1	1	0.990481	-0.00415407	0.739896	0.13083		34.6	16	16	0.837731	1.00808	0.00349715	13.153	24	28.7	12	12	0.88633	0.99667	-0.00144861	37.776	19	33.7	16	16	0.89261	0.96714	-0.0145107	6.6466	23
	898	Tb927.11.1890	Tb927.11.1890		hypothetical protein, conserved	36.025	36.8	0	53.555	1		0.991303	-0.00379346	0.52882	0.276692		30.1	6	6	0.898231	1.07578	0.0317227	10.072	5	14.7	3	3	0.70958	0.80184	-0.0959123	35.795	2	36.8	8	8	1.0485	1.1293	0.0528093	17.541	7
	2047	Tb927.8.6390	Tb927.8.6390	TbLysoPLA	lysophospholipase, putative,alpha/beta hydrolase, putative (TbLysoPLA)	30.092	36.8	0	58.322	1	1	0.984921	-0.0065988	0.910199	0.0408635		34.3	6	6	0.817862	0.971817	-0.0124154	19.767	7	26.4	4	4	0.87666	0.9858	-0.00621119	3.2667	5	36.8	8	8	0.92055	0.99731	-0.00116983	8.2024	10
	1954	Tb927.8.2880	Tb927.8.2880		hypothetical protein, conserved	125.11	36.8	0	225.75	1	1	0.979084	-0.00918	0.831697	0.0800349		29.4	26	26	0.835631	1.00501	0.00217254	21.994	33	29.3	21	21	0.87344	0.98436	-0.00684604	13.919	32	29.4	24	24	0.87725	0.94871	-0.0228665	25.718	33
	160	Tb11.v5.0325	Tb11.v5.0325		retrotransposon hot spot (RHS) protein, putative	36.986	36.6	0	30.962	1	1	0.876172	-0.0574104	0.786264	0.104431		24.6	7	2	0.798594	0.952744	-0.0210238	16.059	3	27.1	7	2	0.93129	1.0472	0.0200296	28.047	3	36.6	11	4	0.62892	0.67416	-0.171237	52.439	6
	144	Tb927.5.295b;Tb11.v5.0214;Tb927.5.280;Tb10.v4.0220	Tb927.5.295b;Tb11.v5.0214		retrotransposon hotspot (RHS) protein 1;retrotransposon hot spot (RHS) protein, putative	95.127	36.6	0	118.1	4	1	1.02705	0.0115906	0.11739	0.930368		18	12	4	0.880669	1.04425	0.0188066	15.475	4	29.4	17	10	0.89315	0.99496	-0.00219438	23.387	11	25.2	18	10	0.97416	1.0427	0.0181594	12.781	11
	246	Tb927.1.2230	Tb927.1.2230		calpain-like protein fragment, putative	13.535	36.6	0	19.839	1		1.00001	4.59235e-06	0.499937	0.301085		15.4	2	1	0.884095	1.05492	0.0232191	NaN	1	27.6	3	1	0.84225	0.94796	-0.02321	NaN	1	17.9	2	0	NaN	NaN		NaN	0
	1263	Tb927.3.2880	Tb927.3.2880		hypothetical protein, conserved	12.643	36.5	0	22.291	1	1	1.00568	0.00245767	0.299554	0.523525		23.1	3	3	0.849473	1.01483	0.00639201	16.761	3	36.5	4	4	0.87749	0.98745	-0.00548489	8.3333	4	23.1	3	3	0.94736	1.015	0.00646604	4.2628	3
	240	Tb927.1.1730	Tb927.1.1730		hypothetical protein, conserved	75.065	36.2	0	119.37	1	1	0.996074	-0.00170859	0.53456	0.272004		29	11	11	0.787588	0.928074	-0.0324173	28.646	14	28.1	10	10	0.88747	0.99846	-0.000669329	5.2826	13	24.2	12	12	0.96889	1.0665	0.0279609	27.42	14
	1609	Tb927.6.2320;Tb927.6.2260	Tb927.6.2320;Tb927.6.2260		hypothetical protein, conserved;hypothetical protein, conserved	20.146	36.2	0	31.513	2		0.991237	-0.00382247	0.601416	0.220825		35.1	4	4	0.875887	1.05048	0.0213857	6.8536	4	36.2	4	4	0.83375	0.95	-0.0222764	13.144	5	35.1	4	4	0.89618	0.97594	-0.0105769	2.4704	5
	410	Tb927.10.14710;Tb927.10.14600	Tb927.10.14710;Tb927.10.14600	RPS2;RPS2	40S ribosomal protein S2, putative (RPS2);40S ribosomal protein S2, putative (RPS2)	28.642	36.1	0	36.422	2		0.989471	-0.00459679	0.634403	0.197634		19.2	4	4	0.823384	0.98912	-0.00475119	18.81	4	15.4	3	3	0.91479	1.0367	0.0156531	76.301	4	29.7	6	6	0.88112	0.94473	-0.0246923	15.144	6
	263	Tb927.1.3950	Tb927.1.3950	ALAT	alanine aminotransferase (ALAT)	55.704	36.1	0	97.104	1	1	1.00003	1.45352e-05	0.499652	0.301333		30.2	8	8	0.89222	1.06684	0.0280981	14.912	10	36.1	10	10	0.84481	0.95088	-0.0218743	6.9333	11	25	7	7	0.91942	0.98587	-0.00618035	12.331	8
	2327	Tb927.9.9630	Tb927.9.9630		hypothetical protein, conserved	38.92	36.1	0	43.989	1		1.01152	0.0049753	0.292201	0.534318		20	5	5	0.873973	1.04774	0.0202515	8.6533	4	22.3	6	6	0.87438	0.99005	-0.00434287	10.182	5	15.2	5	5	0.92035	0.99774	-0.000982616	19.801	5
	2182	Tb927.9.1420	Tb927.9.1420		hypothetical protein, conserved	34.625	36	0	40.648	1		1.00919	0.00397102	0.317091	0.498816		29.9	7	7	0.855505	1.02419	0.010381	8.4056	9	31.2	6	6	0.86378	0.97658	-0.0102922	14.574	9	29.9	6	6	0.9416	1.0276	0.0118241	3.618	9
	1967	Tb927.8.3380	Tb927.8.3380		electron transfer protein, putative	27.259	36	0	44.464	1	1	1.03227	0.0137943	0.0798777	1.09757		16.9	4	4	0.874202	1.04636	0.0196828	5.1263	4	28.5	5	5	0.87982	1.0028	0.00121433	13.967	9	24.4	6	6	0.94446	1.0483	0.0204856	12.589	8
	1726	Tb927.7.1630	Tb927.7.1630		hypothetical protein, conserved	22.379	35.9	0	16.633	1		0.991062	-0.00389935	0.542042	0.265967		6.1	1	1	0.749794	0.893017	-0.0491405	NaN	1	29.8	3	3	0.85271	0.95034	-0.022121	5.9812	3	6.1	1	1	1.0744	1.147	0.0595634	NaN	1
	543	Tb927.10.4680	Tb927.10.4680		NUDIX hydrolase, conserved,predicted MutT/NUDIX family protein	32.246	35.9	0	43.198	1		0.963646	-0.0160825	0.710643	0.148349		25.2	4	4	0.74638	0.884643	-0.0532321	25.743	4	31.2	5	5	0.83622	0.94378	-0.0251292	5.6874	5	20.1	3	3	0.96818	1.0718	0.0301138	41.464	3
	1325	Tb927.3.5090	Tb927.3.5090	TXN2	tryparedoxin, putative	22.18	35.9	0	81.661	1		1.02888	0.012363	0.252572	0.597615		31.8	4	4	0.860659	1.03132	0.0133939	3.8499	6	31.8	4	4	0.97202	1.0925	0.0384214	6.8458	5	30.8	4	4	0.89632	0.96666	-0.0147263	37.215	4
	1875	Tb927.7.710	Tb927.7.710	HSP70	heat shock 70 kDa protein, putative (HSP70)	70.211	35.8	0	237.49	1		0.99781	-0.000952196	0.547017	0.261999		28.5	16	13	0.90629	1.03045	0.0130269	19.76	14	35.1	17	15	0.84223	0.97641	-0.0103678	8.6214	20	30.4	15	12	0.92199	0.98738	-0.00551567	6.6121	15
	1528	Tb927.5.3400	Tb927.5.3400		calcium-translocating P-type ATPase,calcium pump	110.32	35.8	0	160.68	1		0.995505	-0.00195634	0.668076	0.175174		22.4	18	18	0.867303	1.00974	0.00421128	23.843	20	30.6	22	22	0.86747	0.97925	-0.00910642	18.511	22	17.2	17	17	0.92851	0.99776	-0.000973911	5.54	19
	1656	Tb927.6.4090	Tb927.6.4090	HSP60	chaperonin HSP60, mitochondrial precursor, putative (HSP60)	58.37	35.7	0	97.808	1	1	1.00564	0.00244468	0.412625	0.384444		22.9	9	9	0.818867	0.970497	-0.0130059	9.5656	10	26.1	9	9	0.88682	0.99976	-0.000104243	14.303	12	32.2	13	13	0.9592	1.0482	0.0204442	14.848	17
	1710	Tb927.7.1050;Tb927.7.1040	Tb927.7.1050;Tb927.7.1040		40S ribosomal protein S16, putative;40S ribosomal protein S16, putative	16.998	35.6	0	12.065	2		1.00843	0.00364379	0.441561	0.35501		22.1	3	3	0.778998	0.940557	-0.026615	14.942	3	16.8	2	2	0.98687	1.1122	0.0461829	5.5687	2	28.9	4	4	0.91036	0.98031	-0.00863657	0.90734	4
	1798	Tb927.7.3940	Tb927.7.3940	MCP16	mitochondrial carrier protein,adenine nucleotide mitochondrial translocator, putative (MCP16)	36.34	35.6	0	146.46	1		1.02073	0.00890906	0.12917	0.888837		17.5	4	4	0.827541	0.997904	-0.000911062	2.8859	6	29.3	7	7	0.92962	1.0443	0.0188253	10.743	12	23.9	6	6	0.94344	1.0205	0.00881301	7.5112	8
	2237	Tb927.9.4190	Tb927.9.4190	ACS1	fatty acyl CoA syntetase 1 (ACS1)	78.959	35.5	0	204.03	1		1.0232	0.0099619	0.142665	0.845682		28.5	16	16	0.848248	1.00939	0.00405771	10.398	17	30.1	17	17	0.89072	1.0049	0.00212285	6.7268	19	35.5	23	23	0.97963	1.0561	0.023705	8.1564	24
	616	Tb927.10.7590	Tb927.10.7590		hypothetical protein, conserved	30.482	35.5	0	44.992	1		0.9956	-0.00191492	0.618448	0.208697		30.5	9	9	0.843739	1.0159	0.00685053	9.8358	11	30.5	9	9	0.88056	0.9991	-0.000391041	7.4547	10	35.5	11	11	0.89624	0.97229	-0.0122042	3.9917	18
	1478	Tb927.5.1470	Tb927.5.1470	B5R	NADH-cytochrome b5 reductase, putative (B5R)	32.756	35.4	0	87.81	1	1	0.97914	-0.0091552	0.788982	0.102933		29.6	8	8	0.814266	0.975134	-0.0109357	14.869	8	30.6	8	8	0.84469	0.94619	-0.0240216	9.1873	10	29.6	8	8	0.95009	1.0174	0.00749173	48.309	9
	1856	Tb927.7.6230	Tb927.7.6230	ARF3	ADP-ribosylation factor, putative (ARF3)	20.714	35.3	0	7.7867	1		0.963118	-0.0163206	0.779588	0.108135		24.7	3	3	0.868583	1.02308	0.00991002	7.7264	3	24.2	3	3	0.78875	0.8944	-0.0484682	16.088	3	17.9	3	3	0.91323	0.97633	-0.0104034	34.591	3
	2249	Tb927.9.5040	Tb927.9.5040	PDEB1	cAMP-specific phosphodiesterase (PDEB1)	103.65	35.3	0	203.29	1		1.00961	0.00415232	0.351296	0.454326		27.1	16	6	0.885504	1.05411	0.0228847	5.5447	7	30.2	16	6	0.87037	0.98391	-0.00704463	1.3887	9	25.7	17	7	0.91732	0.99224	-0.00338327	24.169	9
	2004	Tb927.8.5120	Tb927.8.5120		cytochrome c	12.3	35.1	0	11.434	1		1.03537	0.0150955	0.368902	0.433089		24.6	2	2	0.840266	1.00344	0.00149227	10.531	2	35.1	3	3	0.79708	0.90132	-0.045121	24.419	4	34.2	3	3	1.1309	1.2272	0.0889153	4.2661	4
	1739	Tb927.7.210	Tb927.7.210		proline dehydrogenase	63.858	35.1	0	226.34	1	1	1.01717	0.00739551	0.0504803	1.29688		30.2	13	13	0.867604	1.02793	0.0119631	10.635	18	27.9	12	12	0.90558	1.0164	0.00706466	7.1877	16	33.8	15	15	0.93582	1.0073	0.00315883	6.0865	21
	1678	Tb927.6.4540	Tb927.6.4540		3-hydroxy-3-methylglutaryl-CoA reductase, putative	45.944	35	0	196.35	1	1	1.00827	0.00357825	0.377379	0.423223		32.5	12	12	0.879507	1.04793	0.0203331	26.467	18	29.7	12	12	0.86087	0.96769	-0.0142637	9.764	17	34.8	13	13	0.93748	1.0108	0.00466523	10.859	18
	2125	Tb927.9.11270	Tb927.9.11270	TCP-1-eta	T-complex protein 1, eta subunit, putative,t- complex protein 1 (eta subunit), putative (TCP-1-eta)	61.471	34.9	0	101.18	1		0.997229	-0.00120507	0.528417	0.277023		26.1	10	10	0.802182	0.946163	-0.0240339	18.708	9	26.6	10	10	0.87297	0.985	-0.00656377	12.27	10	20.8	9	9	0.98919	1.0641	0.0269824	8.7882	10
	1929	Tb927.8.2020	Tb927.8.2020		agmatinase, putative	36.517	34.7	0	39.458	1	1	1.03408	0.0145561	0.310982	0.507264		22.7	5	5	0.827472	0.985028	-0.0065516	22.229	5	23.6	4	4	1.0205	1.1608	0.0647574	36.975	4	14.8	4	4	0.89897	0.96708	-0.0145376	6.4742	3
	1985	Tb927.8.4330	Tb927.8.4330	RAB11	small GTP-binding protein Rab11 (RAB11)	23.527	34.7	0	41.371	1		0.949586	-0.0224656	0.744527	0.12812		25	4	4	0.710682	0.841043	-0.0751819	22.768	5	26.4	4	4	0.93498	1.0517	0.0218919	8.3246	4	34.7	6	6	0.90411	0.96804	-0.0141067	5.5492	9
	669	Tb927.10.9820;Tb11.v5.0565	Tb927.10.9820;Tb11.v5.0565		mitochondrial intermediate peptidase, putative,metallo-peptidase, Clan MA(E) Family M3;mitochondrial intermediate peptidase, putative	76.732	34.7	0	242.62	2	1	0.990059	-0.00433878	0.63087	0.20006		32.1	15	15	0.797194	0.950932	-0.0218506	16.178	18	29.6	13	13	0.87018	0.98177	-0.00799024	10.07	19	28.4	13	13	0.96179	1.0395	0.0168245	13.049	16
	2273	Tb927.9.6450	Tb927.9.6450		hypothetical protein, conserved	50.126	34.7	0	86.165	1		1.01085	0.0046879	0.311839	0.506069		10.4	3	3	0.873134	1.03345	0.0142907	2.6666	3	31.1	9	9	0.86132	0.97377	-0.0115436	7.0009	11	20.1	6	6	0.95265	1.0264	0.0113166	8.9321	5
	1044	Tb927.11.6540	Tb927.11.6540		hypothetical protein, conserved	60.154	34.7	0	149.88	1		0.966645	-0.0147329	0.84141	0.0749925		26.5	9	9	0.838223	0.998602	-0.000607568	11.295	10	26.9	9	9	0.87854	0.98433	-0.00685928	18.259	9	31.5	11	11	0.85027	0.9189	-0.0367317	37.472	11
	1677	Tb927.6.4530	Tb927.6.4530	RBP17	RNA-binding protein, putative (RBP17)	16.821	34.6	0	9.5766	1		0.970475	-0.0130156	0.799825	0.097005		18.3	2	2	0.78376	0.934492	-0.0294243	2.0987	2	28.8	3	3	0.922	1.0257	0.0110204	11.863	3	23.5	3	3	0.8795	0.95358	-0.0206429	15.677	3
	1035	Tb927.11.6250	Tb927.11.6250		hypothetical protein, conserved	27.599	34.6	0	210.54	1	1	1.00031	0.00013479	0.493868	0.306389		32	7	7	0.861995	1.00995	0.00429901	15.677	11	30.9	6	6	0.88952	1.0257	0.0110204	5.4518	9	32	6	6	0.88864	0.96624	-0.014915	4.5432	9
	419	Tb927.10.14950	Tb927.10.14950	ZC3H40	RNA binding protein, putative,zinc finger protein family member, putative (ZC3H40)	46.194	34.5	0	52.619	1		1.02581	0.0110666	0.40559	0.391913		18.8	5	5	0.995818	1.20205	0.0799236	14.717	5	22.5	5	5	0.91858	1.0333	0.0142264	9.9571	5	24.3	7	7	0.80781	0.86906	-0.0609502	11.639	8
	212	Tb927.10.13780;Tb11.v5.0718	Tb927.10.13780;Tb11.v5.0718	GSK3	glycogen synthase kinase 3 (GSK3);protein kinase, putative	40.32	34.4	0	35.751	2		1.03891	0.0165788	0.221251	0.655114		23.3	6	6	0.916758	1.07475	0.031307	17.585	7	28.1	8	8	0.84815	0.95896	-0.0181995	9.9742	9	11.6	3	3	1.0135	1.088	0.0366289	16.681	3
	261	Tb927.1.3830	Tb927.1.3830	PGI	glucose-6-phosphate isomerase, glycosomal (PGI)	67.614	34.4	0	143.05	1		0.958635	-0.0183469	0.932929	0.0301515		17.8	9	9	0.833889	0.98668	-0.00582372	22.349	13	28.3	11	11	0.85133	0.96057	-0.017471	11.876	13	25	11	11	0.83944	0.92951	-0.0317459	4.6495	12
	1509	Tb927.5.2780	Tb927.5.2780		mitochondrial DNA polymerase beta	46.102	34.2	0	76.59	1	1	1.0206	0.00885509	0.0969057	1.01365		27.8	8	8	0.853971	1.02094	0.00899979	5.1409	8	28.5	8	8	0.88893	1.0019	0.000824377	7.8312	11	29	8	8	0.96303	1.0393	0.0167409	5.3132	9
	1361	Tb927.4.1360	Tb927.4.1360		hypothetical protein, conserved	32.547	34.1	0	54.599	1		0.963198	-0.0162844	0.765222	0.116212		31.4	6	6	0.811886	0.965997	-0.0150243	13.93	8	20.8	4	4	0.79588	0.89378	-0.0487694	11.422	5	34.1	8	8	0.95183	1.035	0.0149403	6.4318	10
	1127	Tb927.11.9670	Tb927.11.9670	GCVT1	glycine synthase, putative (GCVT1)	41.142	34.1	0	71.019	1	1	0.997698	-0.00100075	0.570879	0.243456		23.7	6	6	0.831186	0.995223	-0.0020796	7.2691	7	23.7	6	6	0.90956	1.0187	0.00804631	7.8043	7	30.9	8	8	0.91856	0.97956	-0.00896896	8.1356	9
	628	Tb927.10.8090	Tb927.10.8090		hypothetical protein, conserved	17.195	34	0	15.438	1	1	1.19361	0.0768614	0.101736	0.992524		12.8	1	1	1.20097	1.4424	0.159085	NaN	1	14.7	1	1	0.95939	1.0711	0.02983	NaN	1	6.4	1	1	1.02	1.1007	0.041669	NaN	1
	541	Tb927.10.4610	Tb927.10.4610	DPMS	dolicholphosphate-mannose synthase, putative (DPMS)	29.086	34	0	22.678	1		1.02107	0.00905463	0.367012	0.43532		18.5	4	4	0.776277	0.9176	-0.0373468	37.875	4	22.4	5	5	0.94818	1.0752	0.0314893	30.599	6	20.5	5	5	1.0028	1.079	0.0330214	13.85	5
	1806	Tb927.7.4140	Tb927.7.4140		hypothetical protein, conserved	20.852	34	0	12.027	1	1	0.858835	-0.0660904	0.814578	0.0890675		29.8	5	5	0.758553	0.859328	-0.065841	19.316	5	11.7	2	2	0.606	0.682	-0.166216	0.28201	2	17	3	3	1.0082	1.0809	0.0337855	4.0216	3
	1451	Tb927.4.520	Tb927.4.520		hypothetical protein, conserved	23.602	34	0	17.239	1	1	0.991127	-0.00387091	0.778693	0.108634		13.3	2	2	0.837802	0.996711	-0.00143079	14.225	3	28.1	4	4	0.86049	0.97313	-0.0118291	7.3653	4	19.2	3	3	0.92397	1.0038	0.00164719	10.755	3
	568	Tb927.10.5760	Tb927.10.5760		adenylate kinase, putative	24.31	34	0	31.394	1		0.987059	-0.00565701	0.806868	0.0931977		29.8	6	6	0.844309	0.9996	-0.000173666	17.88	5	29.8	6	6	0.85367	0.96396	-0.015941	6.2604	6	33.5	6	6	0.92567	0.99803	-0.000856404	9.872	6
	1581	Tb927.6.1200	Tb927.6.1200		hypothetical protein, conserved	52.96	34	0	73.021	1	1	0.962384	-0.0166514	0.983644	0.00716194		24.6	8	8	0.800192	0.95429	-0.0203198	11.331	10	27.8	8	8	0.86251	0.97608	-0.0105146	13.794	9	22.9	9	9	0.87	0.95693	-0.0191198	39.875	11
	1188	Tb927.2.4900;Tb927.2.4750	Tb927.2.4900;Tb927.2.4750		hypothetical protein, conserved;hypothetical protein, conserved	34.716	33.7	0	60.391	2		1.0688	0.0288964	0.115599	0.937047		21.2	4	4	0.855505	1.00554	0.00239935	25.918	4	17.5	3	3	1.0227	1.1497	0.0605845	11.091	4	33.7	7	7	0.98477	1.0561	0.023705	2.5427	8
	222	Tb927.9.3590;Tb11.v5.0904	Tb927.9.3590;Tb11.v5.0904		monothiol glutaredoxin, putative;glutaredoxin-like protein, putative	20.43	33.7	0	22.996	2	1	0.962134	-0.0167643	0.718607	0.143509		20.7	3	3	0.90876	1.07621	0.0318954	36.543	3	15.8	2	2	0.81402	0.91564	-0.0382752	12.741	2	25.5	4	4	0.83564	0.90383	-0.0439132	21.142	5
	278	Tb927.1.720	Tb927.1.720	PGKA	phosphoglycerate kinase (PGKA)	55.747	33.6	0	57.553	1		1.04188	0.0178164	0.298306	0.525338		15.1	5	4	0.987654	1.1644	0.0661029	18.368	5	20	6	5	0.92676	1.0475	0.020154	8.2944	5	22.6	8	5	0.8609	0.92724	-0.0328078	11.796	5
	1712	Tb927.7.1080	Tb927.7.1080		hypothetical protein, conserved	40.968	33.6	0	34.977	1	1	1.02697	0.0115575	0.253892	0.595351		15.8	4	4	0.914913	1.09638	0.0399623	13.78	4	26.1	6	6	0.87143	0.98337	-0.00728305	11.058	6	23.3	6	6	0.92931	1.0046	0.00199317	20.601	7
	1924	Tb927.8.1890	Tb927.8.1890		cytochrome c1, heme protein, mitochondrial precursor	30.071	33.3	0	80.625	1	1	1.01705	0.00734248	0.288616	0.539679		28.3	5	5	0.828569	0.987362	-0.00552368	11.687	8	23.6	4	4	0.89322	0.99551	-0.00195437	14.694	5	21.3	5	5	1.0007	1.0703	0.0295055	7.6679	9
	547	Tb927.10.4850	Tb927.10.4850		hypothetical protein, conserved	51.34	33.3	0	57.647	1	1	1.01512	0.0065166	0.273102	0.563675		31.1	9	9	0.820614	0.974469	-0.011232	4.5244	11	28.6	8	8	0.91238	1.0288	0.012331	9.0873	12	33.3	10	10	0.96703	1.0434	0.0184508	14.253	13
	2191	Tb927.9.15090	Tb927.9.15090		cytosolic coat protein, putative	24.595	33.3	0	36.655	1		1.01303	0.00562109	0.292803	0.533424		17.8	4	4	0.840195	1.00659	0.00285391	8.9187	5	28.8	5	5	0.87067	0.98192	-0.00792389	33.974	6	30.1	5	5	0.94901	1.0518	0.0219332	8.3667	7
	1885	Tb927.7.7440	Tb927.7.7440		hypothetical protein, conserved	14.51	33.3	0	17.819	1	1	0.911463	-0.040261	0.903429	0.0441058		33.3	3	3	0.824266	0.996413	-0.00156066	11.895	3	26	2	2	0.79746	0.8991	-0.046192	21.276	2	7.3	1	1	0.77646	0.84522	-0.0730302	NaN	1
	866	Tb927.11.16200	Tb927.11.16200	CAP17	microtubule-associated protein,corset-associated protein 17 (CAP17)	14.854	33.3	0	10.532	1		1.0122	0.00526633				0	0	0	NaN	NaN		NaN	0	33.3	3	3	0.89441	1.0122	0.00526633	8.2905	2	25	1	1	NaN	NaN		NaN	0
	1284	Tb927.3.3630	Tb927.3.3630	EF-Ts	elongation factor ts, putative (EF-TS)	29.732	33.2	0	89.075	1	1	1.03263	0.0139457	0.217316	0.662908		26.3	5	5	0.814332	0.969274	-0.0135534	35.601	6	28.5	4	4	0.96308	1.084	0.0350293	41.025	7	33.2	5	5	0.96672	1.048	0.0203613	11.799	7
	472	Tb927.10.240	Tb927.10.240	PEX14	peroxin 14, putative (PEX14)	39.937	33.1	0	35.753	1		0.954979	-0.0200062	0.801756	0.0959579		22.4	6	6	0.751089	0.889442	-0.0508822	25.43	6	26	7	7	0.92056	1.032	0.0136797	11.595	7	19.1	5	5	0.88604	0.94882	-0.0228162	3.9297	5
	1370	Tb927.4.1760	Tb927.4.1760		hypothetical protein, conserved	17.442	33.1	0	4.0605	1	1	0.978602	-0.0093938	0.87716	0.0569209		0	0	0	NaN	NaN		NaN	0	33.1	3	3	0.85595	0.97004	-0.0132104	34.591	3	21.7	2	2	0.89432	0.98724	-0.00557726	14.925	2
	514	Tb927.10.370	Tb927.10.370		calcineurin B subunit, putative	19.872	33	0	25.721	1		0.946519	-0.0238707	0.864485	0.0632425		18.4	2	2	0.774953	0.929023	-0.0319737	0.7011	2	14.5	2	2	0.79328	0.89875	-0.0463611	NaN	1	18.4	2	2	0.92618	1.0156	0.00672269	19.165	3
	708	Tb927.11.10780	Tb927.11.10780		hypothetical protein, conserved	30.902	33	0	28.939	1	1	0.972087	-0.012295	0.639902	0.193887		15.8	4	4	0.902283	1.06339	0.0266922	7.7382	3	28.3	6	6	0.89929	1.017	0.00732095	18.153	7	16.1	4	4	0.79081	0.84938	-0.070898	9.8686	4
	1176	Tb927.2.4230;Tb11.v5.0827	Tb927.2.4230		NUP-1 protein, putative	406.9	33	0	241.98	2		0.966228	-0.0149204	0.825565	0.0832485		21.1	9	9	0.861104	1.01292	0.005573	20.565	12	15.9	8	8	0.86245	0.96964	-0.0133895	8.4847	10	28	17	17	0.8419	0.91845	-0.0369445	21.336	19
	1252	Tb927.3.2370	Tb927.3.2370		hypothetical protein, conserved	15.403	32.8	0	41.627	1	1	1.25698	0.0993291	0.164278	0.784421		32.8	2	2	1.41519	1.69208	0.22842	13.898	2	32.8	2	2	0.81847	0.91291	-0.039572	26.966	3	32.8	2	2	1.1795	1.2857	0.10914	9.0106	2
	2216	Tb927.9.2600	Tb927.9.2600		hypothetical protein, conserved	24.515	32.8	0	42.062	1		1.00179	0.000777063	0.378017	0.422488		27.5	4	4	0.821355	0.993049	-0.00302945	35.999	5	20.1	3	3	0.9041	1.0105	0.00453632	30.48	4	25.3	4	4	0.93147	1.0019	0.000824377	9.7987	5
	1434	Tb927.4.4320	Tb927.4.4320		divalent cation tolerance protein, putative	12.973	32.8	0	15.797	1	1	0.965788	-0.0151183	0.834933	0.0783486		32.8	2	2	0.853388	1.01995	0.00857888	5.8947	2	32.8	2	2	0.83467	0.93938	-0.0271587	39.753	2	32.8	2	2	0.87227	0.94021	-0.0267751	3.5432	2
	2280	Tb927.9.6910	Tb927.9.6910		hypothetical protein, conserved	17.806	32.7	0	9.1294	1	1	1.07571	0.0316961	0.0692432	1.15962		13.6	1	1	0.924813	1.096	0.0398102	NaN	1	13.6	2	2	0.90707	1.0136	0.0058666	39.398	2	24.1	3	3	1.0449	1.1205	0.0494119	36.492	3
	2261	Tb927.9.5840;Tb927.9.5750	Tb927.9.5840;Tb927.9.5750	TRYP1;TRYP1	unspecified product (TRYP1);unspecified product (TRYP1)	22.424	32.7	0	19.988	2		1.06963	0.0292331	0.0879588	1.05572		18.6	3	3	0.941265	1.13393	0.0545855	20.468	3	18.6	3	3	0.88602	1.0126	0.00543792	7.3619	3	32.7	5	5	0.98153	1.0658	0.0276757	15.099	4
	1584	Tb927.6.1520	Tb927.6.1520	AQP1	aquaporin 3, putative (AQP1)	35.066	32.7	0	123.93	1		0.97641	-0.0103677	0.781823	0.106891		23.4	5	5	0.849473	1.01014	0.00438243	11.996	7	32.7	6	6	0.82272	0.93052	-0.0312743	13.543	9	23.4	5	5	0.91985	0.99035	-0.00421129	7.3989	8
	1707	Tb927.6.950	Tb927.6.950	CysRS	cysteinyl-tRNA synthetase, putative	89.376	32.7	0	206.85	1	1	0.959506	-0.0179522	0.911369	0.0403055		29.8	17	17	0.827062	0.988338	-0.00509468	9.5921	17	25.9	14	14	0.81295	0.92318	-0.0347136	12.297	19	32.7	21	21	0.90025	0.96817	-0.0140484	61.59	27
	283	Tb927.1.860	Tb927.1.860		hypothetical protein, conserved	29.562	32.5	0	145.23	1		1.00186	0.000804911	0.475088	0.323226		26.9	3	3	0.87558	1.05208	0.0220479	6.9089	3	26.9	3	3	0.84127	0.96154	-0.0170326	3.5798	3	32.5	4	4	0.92592	0.99403	-0.00260051	9.3921	4
	408	Tb927.10.14550	Tb927.10.14550		ATP-dependent DEAD/H RNA helicase, putative	71.366	32.4	0	184.31	1		1.02114	0.00908672	0.309948	0.508712		23.5	12	11	0.814996	0.977326	-0.00996055	19.092	15	27.1	13	12	0.96941	1.0967	0.0400878	18.51	16	28.8	15	14	0.91357	0.99342	-0.0028671	5.8672	19
	1241	Tb927.3.2090;Tb11.v5.0697	Tb927.3.2090;Tb11.v5.0697		aminopeptidase P1, putative,metallo-peptidase, Clan MG, Family M24;aminopeptidase P1, putative	68.387	32.4	0	75.861	2		0.998601	-0.000608019	0.526474	0.278623		27.6	12	12	0.809848	0.962742	-0.0164901	18.397	12	14.1	5	5	0.90572	1.0237	0.0101727	7.9706	5	22.3	9	9	0.94228	1.0104	0.00449334	6.0568	9
	644	Tb927.10.8730	Tb927.10.8730		hypothetical protein, conserved	50.876	32.4	0	104.27	1	1	1.02142	0.00920435	0.192768	0.714966		29	9	9	0.847027	0.998802	-0.000520814	3.8555	11	24.4	7	7	0.94362	1.0613	0.0258382	19.835	9	25.8	8	8	0.92638	1.0053	0.00229568	20.725	9
	2321	Tb927.9.9290	Tb927.9.9290	PABP1	Polyadenylate-binding protein 1 (Poly(A)-binding protein 1) (PABP 1) (PABP1)	63.029	32.3	0	94.767	1		0.975862	-0.0106115	0.798441	0.0977569		27.6	13	13	0.817394	0.976086	-0.010512	9.8669	14	18.2	8	8	0.90968	1.0158	0.00680821	3.5921	7	28.8	14	14	0.86897	0.93728	-0.0281306	18.065	16
	1047	Tb927.11.6630	Tb927.11.6630		3-methylcrotonoyl-CoA carboxylase beta subunit, putative	66.531	32.2	0	83.864	1	1	0.994469	-0.00240853	0.641213	0.192998		22.9	10	10	0.819001	0.968336	-0.0139741	21.798	11	20.1	11	11	0.8922	1.0072	0.00311572	46.352	14	27.6	11	11	0.94379	1.0084	0.00363284	10.606	12
	1195	Tb927.2.5160	Tb927.2.5160		chaperone protein DNAj, putative	44.327	32.2	0	110.85	1		0.97897	-0.00923043	0.783764	0.105815		22.5	5	5	0.848105	1.02232	0.00958558	15.931	7	19.2	4	4	0.86308	0.9621	-0.0167798	117.49	5	17.5	4	4	0.89111	0.9539	-0.0204972	9.7768	4
	2144	Tb927.9.12500	Tb927.9.12500		hypothetical protein, conserved	58.24	32.1	0	81.998	1		0.982891	-0.0074946	0.625958	0.203455		27.5	10	10	0.902853	1.07899	0.0330186	32.214	12	27.7	10	10	0.83958	0.94573	-0.0242328	7.6097	10	28.8	11	11	0.86424	0.93053	-0.0312696	5.5306	11
	1296	Tb927.3.4260	Tb927.3.4260		hypothetical protein, conserved	41.306	32.1	0	65.408	1	1	1.03451	0.0147348	0.145749	0.836395		25.5	6	6	0.924214	1.0705	0.0295879	22.636	7	32.1	7	7	0.9263	1.0468	0.0198637	13.066	7	17.9	4	4	0.92842	0.98799	-0.00524745	13.044	4
	880	Tb927.11.1670	Tb927.11.1670		cysteine desulfurase	48.151	32	0	60.434	1	1	0.968679	-0.0138203	0.647966	0.188448		13.7	5	5	0.834376	0.986777	-0.00578089	13.816	6	16	5	5	0.74955	0.84717	-0.0720294	8.0934	7	29.3	9	9	1.0041	1.0873	0.0363494	25.541	8
	1908	Tb927.8.1420	Tb927.8.1420	ACAD	acyl-CoA dehydrogenase, mitochondrial precursor, putative	55.982	32	0	44.213	1	1	1.0171	0.00736215	0.181555	0.740991		29.7	10	10	0.878272	1.03553	0.0151623	17.038	11	14.8	5	5	0.87388	0.9883	-0.0051112	16.357	5	22.2	8	8	0.96052	1.0281	0.0120354	23.509	10
	317	Tb927.10.11220	Tb927.10.11220	PSSA-2	procyclic form surface phosphoprotein (PSSA-2)	46.04	32	0	84.83	1		1.01463	0.00630839	0.364695	0.43807		23.8	5	5	0.860215	1.02839	0.0121595	6.5146	6	25.6	5	5	0.95128	1.0725	0.0303973	4.6272	5	32	7	7	0.87879	0.94704	-0.0236317	13.228	9
	243	Tb927.1.2100	Tb927.1.2100		calpain-like cysteine peptidase, putative,cysteine peptidase, Clan CA, family C2, putative	126.15	32	0	114.03	1		0.932667	-0.0302732	0.954104	0.0204044		21.6	15	15	0.795165	0.94162	-0.0261245	18.641	17	9.2	7	7	0.78503	0.8932	-0.0490513	12.418	9	25.7	14	14	0.90167	0.96462	-0.0156437	8.438	15
	936	Tb927.11.3030	Tb927.11.3030	PRS	phosphoribosylpyrophosphate synthetase, putative (PRS)	39.402	31.7	0	50.004	1		0.98022	-0.0086766	0.655433	0.183472		20.2	5	5	0.765697	0.908843	-0.0415111	2.1907	6	25.6	6	6	0.93445	1.0555	0.0234582	25.831	8	26.4	7	7	0.90623	0.9818	-0.00797697	6.5195	8
	2203	Tb927.9.1700	Tb927.9.1700		hypothetical protein, conserved	67.667	31.6	0	264.36	1		0.99664	-0.00146152	0.543953	0.264439		27.8	12	12	0.790639	0.944376	-0.024855	11.689	16	23.3	10	10	0.9072	1.0215	0.00923837	7.2358	14	30.1	13	13	0.95489	1.0262	0.011232	9.0778	19
	592	Tb927.10.6640	Tb927.10.6640		COP-coated vesicle membrane protein erv25 precursor, putative,ER--golgi transport protein erv25 precursor, putative	28.188	31.6	0	114	1		1.03568	0.0152272	0.236694	0.625812		31.6	6	6	0.933097	1.11643	0.0478327	8.5892	7	28.5	5	5	0.86244	0.97383	-0.0115169	6.6229	5	27.7	5	5	0.94369	1.0218	0.0093659	5.5295	7
	1207	Tb927.2.6070	Tb927.2.6070	MRB6070	mitochondrial RNA binding complex 1 subunit (MRB6070)	31.486	31.6	0	43.187	1	1	1.01662	0.00716011	0.381626	0.418362		27.4	6	6	0.938174	1.11522	0.0473625	7.1364	7	22.1	4	4	0.87643	0.99121	-0.00383433	7.6382	4	26.3	6	6	0.88524	0.9505	-0.0220479	38.741	6
	1093	Tb927.11.8800	Tb927.11.8800		hypothetical protein, conserved	30.621	31.4	0	19.674	1	1	1.03636	0.0155122	0.134416	0.871548		19.1	4	4	0.838434	1.00283	0.00122645	19.652	4	22	4	4	0.89205	1.0232	0.00996053	14.72	4	24.9	5	5	1.016	1.0848	0.0353497	19.827	4
	1131	Tb927.11.9720	Tb927.11.9720		40S ribosomal protein S27, putative	9.6302	31.4	0	12.217	1		0.912555	-0.0397411	0.947801	0.0232828		31.4	2	2	0.808734	0.971345	-0.0126264	5.0467	3	31.4	2	2	0.79727	0.8963	-0.0475466	2.5825	4	15.1	1	1	0.80568	0.87287	-0.0590504	NaN	1
	796	Tb927.11.13890	Tb927.11.13890		hypothetical protein, conserved	30.693	31.3	0	29.276	1	1	0.98632	-0.0059823	0.703115	0.152973		17.9	4	4	0.834585	0.998702	-0.000564211	3.2448	4	21.3	5	5	0.83475	0.94517	-0.0244901	13.806	3	12.3	3	3	0.93617	1.0165	0.00710738	2.8298	3
	1631	Tb927.6.3050	Tb927.6.3050		aldehyde dehydrogenase family, putative	59.689	31.3	0	112.59	1	1	1.01558	0.0067148	0.323318	0.490371		24.7	10	10	0.916758	1.0758	0.0317319	18.158	13	21	9	9	0.85637	0.98188	-0.00794159	16.87	11	26.2	9	9	0.91728	0.99164	-0.00364596	18.81	12
	1365	Tb927.4.1590.1;Tb927.4.1590.2	Tb927.4.1590.1;Tb927.4.1590.2		unspecified product;unspecified product	48.07	31.2	0	74.869	2		0.997787	-0.000962306	0.520556	0.283532		22.8	7	7	0.806712	0.962557	-0.0165738	9.0424	8	25.3	8	8	0.95834	1.0767	0.0320947	20.342	9	31.2	10	10	0.88123	0.9585	-0.0184079	13.508	14
	513	Tb927.10.3650	Tb927.10.3650		NADH-dependent fumarate reductase, putative	133.53	31.2	0	241.86	1	1	1.01439	0.00620446	0.206046	0.686037		19	19	16	0.868583	1.04192	0.0178327	12.341	15	16.7	15	12	0.87955	1.0074	0.00320195	30.116	14	23.5	25	21	0.9173	0.99444	-0.00242142	7.5172	20
	1098	Tb927.11.8970	Tb927.11.8970		ribose 5-phosphate isomerase, putative	16.957	31	0	9.2041	1		1.06135	0.02586	0.270947	0.567115		31	3	3	0.77232	0.923702	-0.034468	21.607	5	11.6	1	1	0.93514	1.056	0.0236639	NaN	1	31	3	3	1.1313	1.2257	0.0883842	25.37	4
	800	Tb927.11.13990	Tb927.11.13990		GDP-L-fucose synthetase, putative	40.659	31	0	77.532	1	1	0.998982	-0.00044227	0.512123	0.290625		31	7	7	0.870171	1.04171	0.0177468	51.641	11	31	7	7	0.91183	1.0146	0.00629486	11.336	11	31	7	7	0.88032	0.94326	-0.0253686	27.932	10
	358	Tb927.10.12840	Tb927.10.12840	MCP12	mitochondrial carrier protein (MCP12)	33.131	30.9	0	100.62	1	1	1.02634	0.0112903	0.0613562	1.21214		23	6	6	0.876808	1.04673	0.019833	8.7497	10	30.9	8	8	0.90384	1.02	0.00860017	6.0749	16	20.4	5	5	0.93683	1.0126	0.00543792	5.1164	9
	2236	Tb927.9.3770	Tb927.9.3770		hypothetical protein, conserved	23.95	30.9	0	21.492	1		0.900019	-0.0457483	0.939683	0.0270186		13.2	2	2	0.795735	0.945627	-0.0242804	11.851	2	17.7	2	2	0.82027	0.92788	-0.0325082	15.383	2	15.5	3	3	0.77508	0.83089	-0.0804565	32.745	3
	2284	Tb927.9.7110	Tb927.9.7110		unspecified product	32.572	30.8	0	19.428	1		0.736916	-0.132582	0.734912	0.133765		23.1	4	4	1.01201	1.22254	0.0872627	81.73	3	17.3	3	3	0.2935	0.33044	-0.480907	72.896	3	17.6	4	4	0.91637	0.9906	-0.00410168	NaN	1
	174	Tb927.10.10310;Tb11.v5.0446	Tb927.10.10310;Tb11.v5.0446		hypothetical protein, conserved;hypothetical protein, conserved	53.184	30.8	0	35.972	2	1	0.858532	-0.0662434	0.91094	0.0405103		13.7	4	4	0.630557	0.752955	-0.123231	4.2552	4	8.7	3	3	0.76138	0.86158	-0.0647044	27.356	3	28.5	8	8	0.90792	0.97545	-0.010795	45.545	8
	759	Tb927.11.1270	Tb927.11.1270		hypothetical protein, conserved	20.267	30.8	0	19.795	1	1	0.961254	-0.0171618	0.931625	0.0307587		17.2	3	3	0.784868	0.933271	-0.0299921	16.324	4	23.1	4	4	0.86051	0.96383	-0.0159996	19.325	4	30.8	5	5	0.91558	0.98743	-0.00549368	12.762	4
	1529	Tb927.5.3410	Tb927.5.3410		hypothetical protein, conserved	30.982	30.8	0	16.766	1	1	0.906032	-0.0428564	0.953799	0.0205432		16.7	4	4	0.729607	0.867604	-0.0616786	19.599	4	19	4	4	0.85455	0.96505	-0.0154502	18.257	5	24.3	6	6	0.80459	0.8883	-0.0514403	20.175	5
	1115	Tb927.11.9420	Tb927.11.9420		ATP synthase, putative	24.788	30.6	0	42.906	1		1.06423	0.0270341	0.314587	0.502259		25.5	4	4	1.1325	1.32464	0.122099	20.503	3	13.9	2	2	0.82606	0.93241	-0.0303931	14.708	3	23.6	4	4	0.91548	0.97588	-0.0106036	15.011	3
	1642	Tb927.6.3650	Tb927.6.3650		ADP-ribosylation factor, putative	20.072	30.6	0	15.394	1		1.03333	0.0142395	0.431978	0.364539		22.4	3	3	1.0166	1.20186	0.0798557	27.15	3	24.6	3	3	0.78172	0.88843	-0.0513768	24.258	3	0	0	0	NaN	NaN		NaN	0
	207	Tb927.10.8230;Tb11.v5.0668	Tb927.10.8230;Tb11.v5.0668		protein disulfide isomerase,bloodstream- specific protein 2 precursor;protein disulfide isomerase	55.579	30.6	0	93.327	2		0.98597	-0.00613624	0.748808	0.12563		23.1	10	10	0.819806	0.964692	-0.0156112	5.0178	11	21.9	10	10	0.85751	0.97362	-0.0116105	3.5466	13	30.6	15	15	0.94737	1.0205	0.00881301	4.9808	21
	1922	Tb927.8.1870	Tb927.8.1870	tGLP1	Golgi/lysosome glycoprotein 1 (tGLP1)	67.597	30.5	0	110.07	1		0.963645	-0.0160831	0.889109	0.0510452		21.3	8	8	0.848824	1.00485	0.00210253	23.485	9	24.8	9	9	0.83913	0.94836	-0.0230268	13.713	14	28.1	11	11	0.87106	0.93902	-0.0273252	10.681	13
	299	Tb927.10.1060	Tb927.10.1060	TCP-1-delta	T-complex protein 1, delta subunit, putative (TCP-1-delta)	58.361	30.4	0	77.064	1		1.02074	0.0089137	0.156617	0.805161		25.7	10	10	0.860215	1.00244	0.00105665	35.925	10	24.3	9	9	0.92979	1.0524	0.0221808	4.0174	9	30.4	12	12	0.93678	1.0081	0.00350361	11.947	13
	681	Tb927.11.10040	Tb927.11.10040		hypothetical protein, conserved	13.539	30.3	0	9.8071	1	1	1.02755	0.0118038	0.371386	0.430174		22.1	2	2	0.761905	0.903996	-0.0438336	18.257	2	15.6	1	1	1.0384	1.1606	0.0646826	NaN	1	23.8	2	2	0.96157	1.0341	0.0145625	13.653	2
	2161	Tb927.9.13380	Tb927.9.13380		phosphoinositide-binding protein, putative	48.172	30.3	0	48.897	1		1.00995	0.00430156	0.433114	0.363398		12.2	4	4	0.783331	0.912409	-0.0398105	1.7761	5	15.8	4	4	0.93386	1.0432	0.0183676	43.22	5	27	8	8	0.99641	1.0823	0.0343477	13.378	7
	619	Tb927.10.7620	Tb927.10.7620		mitochondrial ATP-dependent zinc metallopeptidase, putative,metallo-peptidase, Clan MA(E) Family M41	71.088	30.3	0	184.35	1	1	0.997748	-0.000979339	0.589831	0.229272		30.1	15	15	0.850919	1.01193	0.0051509	14.182	19	24	13	13	0.85964	0.98195	-0.00791063	15.504	17	23	13	13	0.92141	0.99959	-0.000178097	22.714	17
	386	Tb927.10.13850	Tb927.10.13850		hypothetical protein, conserved	43.008	30.3	0	58.086	1	1	0.964828	-0.0155501	0.995108	0.00212959		24.7	7	7	0.815727	0.963391	-0.0161974	4.7447	9	18.4	5	5	0.85852	0.9714	-0.0126019	22.578	6	22.6	8	8	0.88797	0.95973	-0.0178509	19.549	11
	768	Tb927.11.13140	Tb927.11.13140	COXX	cytochrome oxidase subunit X (COXX)	13.672	30.2	0	39.701	1	1	1.04485	0.0190527	0.271046	0.566957		23.3	2	2	0.940468	1.11932	0.0489539	6.2839	2	23.3	2	2	0.81808	0.92668	-0.0330702	11.01	3	30.2	3	3	1.0158	1.0997	0.0412742	5.4562	3
	1957	Tb927.8.3040	Tb927.8.3040		hypothetical protein, conserved	22.299	30.2	0	14.81	1	1	0.950929	-0.0218517	0.764616	0.116557		17.8	2	2	0.897666	1.06449	0.0271404	18.865	2	30.2	4	4	0.78795	0.88565	-0.0527379	13.531	4	17.8	2	2	0.84456	0.9121	-0.0399575	9.8583	2
	1507	Tb927.5.2560	Tb927.5.2560		hypothetical protein, conserved	8.7229	30.1	0	14.533	1	1	1.0341	0.0145624	0.245071	0.610708		30.1	2	2	0.841538	0.991572	-0.00367588	4.5426	2	30.1	2	2	0.88076	0.99556	-0.00193256	1.8379	3	30.1	2	2	1.0394	1.1202	0.0492956	15.288	3
	1857	Tb927.7.6260	Tb927.7.6260		hypothetical protein, conserved	36.454	30.1	0	173.73	1		1.0308	0.0131733	0.124851	0.903607		21.7	6	6	0.899685	1.0705	0.0295879	14.774	9	30.1	7	7	0.89826	1.0117	0.00505175	10.346	10	25.8	7	7	0.93	1.0113	0.00488001	2.1241	10
	1140	Tb927.11.9890	Tb927.11.9890		signal recognition particle receptor alpha subunit, putative	63.526	30.1	0	109.44	1		1.00326	0.00141323	0.463981	0.3335		23	9	9	0.89214	1.06918	0.0290492	13.142	12	19.6	8	8	0.86362	0.97457	-0.011187	4.7706	11	27	11	11	0.88622	0.96912	-0.0136224	13.243	16
	536	Tb927.10.4240	Tb927.10.4240		hypothetical protein, conserved	14.753	30	0	13.005	1	1	1.08155	0.0340473	0.290528	0.536812		16.7	2	2	0.737953	0.881213	-0.0549193	10.519	2	8.3	1	1	1.1466	1.3359	0.125774	NaN	1	30	4	4	0.98391	1.0747	0.0312872	6.5603	5
	1357	Tb927.4.1280	Tb927.4.1280		hypothetical protein, conserved	43.863	29.9	0	214.3	1	1	0.997405	-0.00112842	0.58358	0.2339		29.9	9	9	0.813736	0.978857	-0.00928088	7.7704	13	29.4	9	9	0.87969	0.99741	-0.00112628	8.1589	10	25.4	7	7	0.93951	1.0163	0.00702193	7.0308	11
	1250	Tb927.3.2300	Tb927.3.2300		hypothetical protein, conserved	22.084	29.9	0	41.606	1	1	0.946688	-0.0237933	0.887202	0.0519777		29.9	4	4	0.799105	0.951022	-0.0218093	40.391	4	21.9	3	3	0.88302	0.99761	-0.00103921	11.153	3	22.4	3	3	0.83802	0.89427	-0.0485313	34.057	4
	2243	Tb927.9.4520	Tb927.9.4520		mitochondrial processing peptide beta subunit, putative,metallo-peptidase, Clan ME, Family M16	53.689	29.8	0	56.703	1	1	1.05279	0.0223425	0.225039	0.647743		22.9	9	9	0.812942	0.973047	-0.0118663	19.025	11	18.9	7	7	1.037	1.1711	0.068594	21.834	10	24.5	10	10	0.94519	1.024	0.0103	27.824	11
	913	Tb927.11.240	Tb927.11.240		hypothetical protein, conserved	114.06	29.8	0	137.17	1	1	0.99306	-0.00302438	0.676558	0.169695		18.7	14	14	0.810044	0.967586	-0.0143105	15.625	15	17.4	14	14	0.892	1.004	0.00173371	31.953	15	22.6	18	18	0.9355	1.0081	0.00350361	12.579	21
	949	Tb927.11.3490	Tb927.11.3490		hypothetical protein, conserved	87.8	29.8	0	180.89	1		1.01371	0.00591396	0.235682	0.627674		28.4	16	16	0.87108	1.03752	0.0159952	19.638	16	21.7	12	12	0.9008	1.0199	0.00855759	10.877	12	26.2	15	15	0.90723	0.98444	-0.00681075	16.423	15
	1520	Tb927.5.3110	Tb927.5.3110		hypothetical protein, conserved	24.469	29.8	0	24.418	1	1	0.967717	-0.0142517	0.821447	0.0854204		17.9	2	2	0.838785	1.0089	0.00384726	15.735	3	17.4	2	2	0.86495	0.97806	-0.0096345	4.9685	2	23.4	3	3	0.84884	0.9184	-0.0369681	6.0886	4
	2276	Tb927.9.6620	Tb927.9.6620		unspecified product	25.522	29.7	0	38.105	1	1	1.13629	0.0554897	0.365878	0.436664		19.6	3	3	1.33197	1.59793	0.203557	27.376	4	4.8	1	1	0.51977	0.594	-0.226214	NaN	1	29.7	5	5	1.4286	1.5457	0.189125	3.4258	5
	146	Tb927.5.440;Tb11.v5.0223	Tb927.5.440;Tb11.v5.0223		trans-sialidase, putative;hypothetical protein, conserved	84.562	29.7	0	66.713	2	1	1.04838	0.0205181	0.293663	0.532151		14.7	8	8	1.02471	1.21492	0.0845473	6.5646	7	21.4	13	13	0.86994	0.97687	-0.0101632	30.104	13	24.3	14	14	0.89566	0.97089	-0.01283	17.648	14
	324	Tb927.10.11390	Tb927.10.11390		60S ribosomal protein L6, putative	21.185	29.7	0	57.832	1		0.969659	-0.0133812	0.755961	0.121501		18.2	4	4	0.78064	0.91391	-0.0390967	6.6907	5	25.5	5	5	0.92149	1.0366	0.0156112	4.2618	6	29.7	6	6	0.8948	0.96237	-0.0166579	5.0649	7
	1669	Tb927.6.4320	Tb927.6.4320		hypothetical protein, conserved	44.423	29.6	0	20.767	1		1.02921	0.0125044	0.337191	0.472124		16.3	5	5	0.886918	1.06584	0.0276908	19.456	5	26.3	7	7	0.81345	0.91713	-0.0375691	31.672	7	18.3	5	5	1.0301	1.1153	0.0473917	93.061	5
	1909	Tb927.8.1440	Tb927.8.1440		maoC-like dehydratase, putative	17.815	29.6	0	18.004	1	1	0.975518	-0.0107647	0.619175	0.208187		21	2	2	0.944733	1.125	0.0511521	5.0382	2	29.6	3	3	0.7968	0.90164	-0.0449668	17.47	3	21	2	2	0.84975	0.91521	-0.0384792	13.394	2
	480	Tb927.10.2610	Tb927.10.2610		hypothetical protein, conserved	54.358	29.5	0	78.748	1		1.00479	0.00207532	0.465854	0.33175		15.9	5	5	0.784068	0.920302	-0.0360697	7.172	6	7.9	2	2	0.96136	1.0917	0.0381033	13.742	2	26	9	9	0.94136	1.0097	0.00419236	44.843	12
	1065	Tb927.11.740	Tb927.11.740	eIF-5A	eukaryotic translation initiation factor 5a, putative (eIF-5A)	17.82	29.5	0	31.406	1		1.05828	0.0245993	0.0535952	1.27087		29.5	4	4	0.9273	1.10053	0.0416035	21.323	4	29.5	4	4	0.91946	1.0468	0.0198637	5.7699	4	15.1	2	2	0.96124	1.0288	0.012331	15.27	3
	1233	Tb927.3.1840	Tb927.3.1840		3-oxo-5-alpha-steroid 4-dehydrogenase, putative	33.355	29.5	0	162.34	1	1	1.0152	0.00655312	0.260998	0.583363		29.5	10	10	0.881445	1.0558	0.0235812	22.197	13	23.8	8	8	0.88843	0.99593	-0.00177119	3.5329	9	24.2	9	9	0.92032	0.99506	-0.00215073	11.66	10
	1896	Tb927.7.900	Tb927.7.900		hypothetical protein, conserved	64.798	29.4	0	134.55	1		1.03439	0.0146856	0.162061	0.790321		21.8	7	7	0.862218	1.02436	0.0104522	6.1344	9	26.6	9	9	0.88564	0.99434	-0.00246509	10.446	10	23.9	8	8	1.0012	1.0866	0.0360697	7.6622	10
	996	Tb927.11.5220	Tb927.11.5220		chaperone protein DNAj, putative	84.81	29.4	0	115.48	1		1.01542	0.00664398	0.22551	0.646834		24.7	12	12	0.830772	0.983671	-0.00715009	21.342	14	25.3	11	11	0.90811	1.0239	0.0102575	12.318	14	18.9	10	10	0.97365	1.0395	0.0168245	26.794	14
	97	Tb927.5.4500;Tb05.5K5.150	Tb927.5.4500;Tb05.5K5.150	TbSAR1	ras-like small GTPase, putative (TbSAR1);small GTP-binding protein, putative,BAC from homologous region on chr5	21.771	29.4	0	8.1898	2		0.997907	-0.000910101	0.527441	0.277826		5.7	1	1	NaN	NaN		NaN	0	29.4	4	4	0.90323	1.0224	0.00962084	25.06	4	5.7	1	1	0.8996	0.974	-0.011441	NaN	1
	811	Tb927.11.14250	Tb927.11.14250	TCP-1-epsilon	T-complex protein 1, epsilon subunit, putative (TCP-1-epsilon)	59.381	29.4	0	72.646	1		0.994601	-0.00235109	0.569855	0.244236		21.7	9	9	0.888178	1.04875	0.0206703	21.764	12	15.2	6	6	0.85926	0.97836	-0.00950131	9.9816	7	27	10	10	0.89264	0.95891	-0.0182222	19.195	11
	2286	Tb927.9.7170	Tb927.9.7170		hypothetical protein, conserved	53.98	29.3	0	48.746	1	1	0.898497	-0.0464836	0.910368	0.0407829		17.6	5	5	0.68956	0.810307	-0.0913504	26.154	7	24.4	7	7	0.86237	0.96325	-0.016261	16.225	7	22.5	7	7	0.85729	0.92931	-0.0318394	7.0631	8
	1004	Tb927.11.550	Tb927.11.550		hypothetical protein SCD6.10	31.292	29.3	0	46.948	1		1.00023	9.92167e-05	0.494335	0.305979		20	4	4	0.817127	0.975895	-0.0105968	5.9568	6	20.7	5	5	0.87647	1.0001	4.34273e-05	6.6537	8	29.3	7	7	0.93645	1.0253	0.010851	5.3212	10
	430	Tb927.10.15420	Tb927.10.15420		hypothetical protein, conserved	44.361	29.2	0	31.672	1	1	1.04394	0.0186745	0.185018	0.732785		22.3	6	6	0.891266	1.05514	0.0233109	25.555	5	18.7	4	4	0.96268	1.1073	0.0442653	9.9558	4	18.5	6	6	0.90431	0.97375	-0.0115525	7.7053	6
	633	Tb927.10.8190	Tb927.10.8190	TCP-1-theta	T-complex protein 1, theta subunit, putative,CCT-theta, putative (TCP-1-theta)	58.081	29.1	0	42.076	1		1.09822	0.0406906	0.114092	0.942744		19.4	7	7	0.828844	1	0	21.147	7	24	8	8	0.9646	1.0964	0.039969	20.005	9	22.2	9	9	1.1128	1.2081	0.0821029	19.745	9
	899	Tb927.11.190	Tb927.11.190		elongation factor, putative	72.602	29.1	0	109.4	1	1	1.02332	0.0100108	0.251097	0.600159		19.3	8	8	0.897666	1.06692	0.0281306	23.562	8	23.7	10	10	0.8665	0.9693	-0.0135418	13.074	13	17.6	9	9	0.95843	1.0362	0.0154436	15.585	9
	1427	Tb927.4.410	Tb927.4.410	CAF40	CAF 40 (CAF40)	35.32	29.1	0	27.432	1		0.966303	-0.0148867	0.888847	0.051173		17.4	4	4	0.803923	0.954927	-0.0200296	6.0909	5	26.3	6	6	0.88662	1.004	0.00173371	11.702	8	17.7	5	5	0.88119	0.9411	-0.0263642	6.6119	7
	1173	Tb927.2.4110	Tb927.2.4110		mitochondrial processing peptidase alpha subunit, putative,metallo-peptidase, Clan ME, Family M16	52.064	29	0	48.27	1	1	1.0197	0.00847177	0.273714	0.562704		19.2	7	7	0.853097	1.02288	0.00982554	19.153	9	20.9	7	7	0.94737	1.0671	0.0282051	17.536	8	20.7	8	8	0.90668	0.97137	-0.0126153	23.992	10
	1944	Tb927.8.2670	Tb927.8.2670		hypothetical protein, conserved	49.125	29	0	43.538	1	1	1.01659	0.00714662	0.377164	0.42347		17.3	5	5	0.940557	1.11382	0.0468154	8.0767	5	23.8	6	6	0.85135	0.96333	-0.0162249	11.132	6	13.1	4	4	0.90999	0.97915	-0.00915077	4.2003	8
	631	Tb927.10.8170	Tb927.10.8170		nuclear pore complex protein (NUP155), putative,nucleoporin, putative	144.37	29	0	174.22	1		0.984485	-0.00679089	0.853254	0.0689216		17.4	15	15	0.830427	0.987557	-0.00543792	29.855	15	15.1	12	12	0.85297	0.96446	-0.0157158	17.772	13	24.6	23	23	0.93987	1.0018	0.000781027	12.285	23
	1846	Tb927.7.5820	Tb927.7.5820		Monooxygenase, putative	55.086	28.9	0	91.746	1	1	0.964247	-0.0158117	0.744454	0.128162		22.1	7	7	0.88308	1.05432	0.0229716	14.495	8	22.3	7	7	0.80214	0.90508	-0.043313	12.489	8	23.5	8	8	0.87667	0.93952	-0.027094	6.0241	8
	627	Tb927.10.8080	Tb927.10.8080		hypothetical protein, conserved	82.38	28.8	0	66.212	1		1.0392	0.0167002	0.232601	0.633388		12.4	6	6	0.806517	0.975515	-0.0107662	21.381	6	20.7	11	11	0.9012	1.0199	0.00855759	25.959	12	18.5	9	9	1.0354	1.128	0.0523091	41.81	11
	1269	Tb927.3.3130	Tb927.3.3130		hypothetical protein, conserved	178.08	28.8	0	321.56	1		1.0035	0.00151826	0.42007	0.376678		15.2	18	18	0.817327	0.973805	-0.0115282	17.167	21	19.2	20	20	0.89776	1.0139	0.00599512	15.523	27	21.7	28	28	0.9434	1.0235	0.0100878	10.119	35
	1640	Tb927.6.3630	Tb927.6.3630	SPL	sphingosine 1-phosphate lyase, putative (SPL)	59.525	28.8	0	63.307	1		1.00249	0.00108111	0.467964	0.329788		25.3	8	8	0.842957	1.00407	0.00176226	8.0347	8	17.3	6	6	0.93102	1.0504	0.0213547	17.526	7	19.1	7	7	0.88223	0.95527	-0.0198739	8.72	7
	822	Tb927.11.14730	Tb927.11.14730		metalloprotease, putative,cell division protein FtsH homologue, putative	74.475	28.8	0	85.631	1	1	1.03647	0.0155579	0.113913	0.943427		24.4	10	10	0.934143	1.08058	0.0336565	13.921	13	25	10	10	0.89888	1.0141	0.00608078	15.418	13	28.8	13	13	0.94208	1.0161	0.00693645	7.6362	15
	1396	Tb927.4.2740	Tb927.4.2740		hypothetical protein, conserved	16.327	28.7	0	16.668	1		1.06511	0.0273956	0.106768	0.971557		15.3	3	3	0.844381	1.01089	0.00470261	3.236	3	16.7	2	2	1.0693	1.05	0.0211893	18.446	4	28.7	5	5	1.0553	1.1384	0.0562949	82.629	7
	145	Tb927.5.450;Tb11.v5.0222	Tb927.5.450;Tb11.v5.0222	NUBM	NADH-ubiquinone oxidoreductase, mitochondrial, putative (NUBM);NADH-ubiquinone oxidoreductase, mitochondrial, putative	55.32	28.6	0	51.221	2		1.07977	0.0333312	0.240272	0.619297		19.6	6	6	0.842176	1.00097	0.000421495	39.465	6	16.1	4	4	1.1518	1.29	0.11059	21.166	4	23.8	8	8	0.91636	0.97495	-0.0110177	10.113	10
	761	Tb927.11.1290	Tb927.11.1290		hypothetical protein, conserved	43.112	28.6	0	33.906	1	1	0.995232	-0.00207574	0.697634	0.156372		22.6	6	6	0.845237	1.00706	0.00305492	12.405	8	26.9	7	7	0.87531	0.98054	-0.00853469	11.529	8	24.4	8	8	0.93261	0.99828	-0.00074763	8.5054	10
	1637	Tb927.6.3570	Tb927.6.3570		tubulin-tyrosine ligase-like protein, conserved	71.692	28.6	0	76.609	1	1	0.922027	-0.0352564	0.90687	0.0424551		17.2	7	7	0.84076	0.9999	-4.34316e-05	14.006	9	20.4	7	7	0.79107	0.89485	-0.0482498	11.707	7	21.3	9	9	0.81452	0.87604	-0.0574761	24.675	10
	115	Tb11.02.5420b;Tb11.02.5420	Tb11.02.5420b;Tb11.02.5420	CPR	NADPH-cytochrome p450 reductase, putative;NADPH-cytochrome p450 reductase, putative (CPR)	69.959	28.5	0	144.91	2		1.03779	0.0161084	0.24946	0.602999		15.5	8	3	0.823249	0.964785	-0.0155693	43.641	2	18.9	9	3	1.0085	1.1276	0.0521551	8.3053	4	23.8	12	7	0.94531	1.0274	0.0117396	29.947	5
	161	Tb11.v5.0326	Tb11.v5.0326		retrotransposon hot spot (RHS) protein, putative	34.883	28.5	0	12.529	1	1	0.990449	-0.00416799	0.544223	0.264223		28.5	7	2	0.968898	1.15395	0.0621862	4.7542	2	28.5	7	2	0.81083	0.91404	-0.0390348	29.3	3	25.5	6	2	0.84978	0.92118	-0.0356555	6.5399	2
	725	Tb927.11.11380	Tb927.11.11380		hypothetical protein, conserved	61.504	28.5	0	123.53	1	1	0.993837	-0.00268469	0.623542	0.205134		24.2	10	10	0.800384	0.960984	-0.0172838	11.824	14	23.1	10	10	0.88375	1.0048	0.00207963	10.394	13	28.5	13	13	0.93122	1.0166	0.00715011	8.6564	20
	1648	Tb927.6.3840	Tb927.6.3840		reticulon domain protein	21.071	28.5	0	14.315	1		0.965913	-0.0150619	0.780068	0.107868		17.2	3	3	0.798339	0.939055	-0.0273088	7.8229	4	28.5	5	5	0.9272	1.038	0.0161974	43.671	7	17.2	3	3	0.85661	0.92454	-0.0340743	6.9463	4
	714	Tb927.11.10960	Tb927.11.10960		hypothetical protein, conserved	71.772	28.5	0	132.64	1	1	0.981319	-0.00818971	0.978537	0.00942291		20.9	9	9	0.826583	0.973426	-0.0116973	13	11	18.9	7	7	0.87282	0.98529	-0.00643592	5.6567	10	21.5	9	9	0.9135	0.98529	-0.00643592	17.331	11
	2092	Tb927.8.820	Tb927.8.820		hypothetical protein, conserved	61.686	28.4	0	102.16	1		1.07488	0.0313592	0.174794	0.757473		22.2	8	8	0.947867	1.11846	0.0486189	21.294	9	22.8	8	8	1.0252	1.1615	0.0650192	19.217	9	17.9	6	6	0.89061	0.95596	-0.0195603	10.305	8
	1466	Tb927.5.1000	Tb927.5.1000		ubiquitin-conjugating enzyme E2, putative,ubiquitin carrier protein, putative,ubiquitin-protein ligase, putative	16.766	28.4	0	23.316	1		1.02592	0.0111126	0.0671113	1.1732		16.2	1	1	0.842105	1.01499	0.00646219	NaN	1	28.4	2	2	0.90903	1.0155	0.00667993	15.88	2	16.2	1	1	0.96943	1.0476	0.0201955	NaN	1
	1880	Tb927.7.7330	Tb927.7.7330		hypothetical protein, conserved	47.401	28.4	0	54.875	1	1	0.993739	-0.00272769	0.619312	0.20809		16.3	6	6	0.875503	1.01735	0.00746868	20.785	6	20.6	6	6	0.88961	1.0058	0.00251163	11.083	6	16.3	6	6	0.89679	0.95904	-0.0181633	15.53	6
	1222	Tb927.3.1600	Tb927.3.1600	Tim10	hypothetical protein, conserved	11.872	28.4	0	3.3328	1	1	1.4094	0.149034				0	0	0	NaN	NaN		NaN	0	28.4	2	2	1.252	1.4094	0.149034	103.94	2	0	0	0	NaN	NaN		NaN	0
	188	Tb927.10.10960;Tb927.10.10950;Tb927.10.10940;Tb927.10.10920;Tb927.10.10910;Tb927.10.10900;Tb927.10.10890;Tb11.v5.0543;Tb927.10.10980;Tb927.10.10970;Tb927.10.10930	Tb927.10.10960;Tb927.10.10950;Tb927.10.10940;Tb927.10.10920;Tb927.10.10910;Tb927.10.10900;Tb927.10.10890;Tb11.v5.0543;Tb927.10.10980;Tb927.10.10970;Tb927.10.10930		heat shock protein, putative;heat shock protein, putative;heat shock protein, putative;heat shock protein, putative;heat shock protein, putative;heat shock protein, putative;heat shock protein, putative;Heat shock protein 83, putative;heat shock pr	80.763	28.3	0	88.543	11		0.973877	-0.0114961	0.80915	0.091971		14.3	9	9	0.830496	1.00104	0.000451865	23.963	11	19.3	11	11	0.8049	0.92881	-0.0320731	8.8938	12	26.3	18	18	0.91228	0.99342	-0.0028671	31.752	21
	1024	Tb927.11.600	Tb927.11.600		hypothetical protein, conserved	12.081	28.3	0	11.687	1	1	0.995437	-0.00198627	0.673938	0.17138		21.7	1	1	0.85492	1.01181	0.00509811	1.2627	2	21.7	1	1	0.87488	0.98211	-0.00783987	4.4402	2	28.3	2	2	0.92362	0.99262	-0.00321698	1.9811	3
	361	Tb927.10.12890	Tb927.10.12890	ProRS	bifunctional aminoacyl-tRNA synthetase, putative	90.96	28.3	0	131.93	1	1	1.03009	0.0128769	0.122291	0.912607		22.2	12	12	0.8967	1.0637	0.0268212	14.512	13	20.9	11	11	0.91743	1.0288	0.012331	19.23	11	20	12	12	0.9201	0.9988	-0.000521466	9.997	13
	1663	Tb927.6.4210	Tb927.6.4210	ALDH	aldehyde dehydrogenase, putative (ALDH)	64.566	28.1	0	65.454	1		1.02637	0.011302	0.185015	0.732793		13.8	6	6	0.819874	0.980969	-0.00834463	6.3053	7	20.8	6	6	0.94339	1.053	0.0224284	37.778	7	12.9	6	6	0.97025	1.0467	0.0198222	9.4081	6
	310	Tb927.10.11030	Tb927.10.11030	ATOM11	hypothetical protein, conserved	11.261	28	0	11.606	1	1	1.05631	0.0237895	0.250681	0.600879		16	2	2	0.933794	1.0903	0.0375456	12.57	2	28	2	2	1.0113	1.1645	0.0661395	NaN	1	28	3	3	0.85877	0.92829	-0.0323163	7.3658	2
	2266	Tb927.9.6090;Tb927.9.6100;Tb11.v5.0854	Tb927.9.6090;Tb927.9.6100;Tb11.v5.0854		PTP1-interacting protein, 39 kDa;TFIIF-stimulated CTD phosphatase, putative;hypothetical protein, conserved	39.499	28	0	16.383	3		0.985448	-0.0063665	0.711505	0.147822		16.3	5	5	0.835213	0.996413	-0.00156066	14.395	6	20.1	4	4	0.83201	0.94418	-0.0249452	22.956	6	13.7	4	4	0.94511	1.0172	0.00740635	14.419	5
	1735	Tb927.7.190	Tb927.7.190	THOP1	thimet oligopeptidase A, putative,metallo- peptidase, Clan MA(E) Family M3, putative (OPA)	84.166	28	0	133.89	1	1	1.0425	0.0180779	0.154816	0.810183		17.8	9	9	0.924984	1.10882	0.0448611	27.127	11	23.4	13	13	0.89699	1.0095	0.00410632	11.262	13	23.6	14	14	0.94769	1.0122	0.00526633	14.267	17
	224	Tb927.4.3080;Tb11.v5.0963	Tb927.4.3080;Tb11.v5.0963		hypothetical protein, conserved;hypothetical protein, conserved	18.44	27.9	0	9.8444	2	1	0.975823	-0.0106291	0.654606	0.18402		6.1	1	1	0.746659	0.899119	-0.0461829	NaN	1	10.9	1	1	0.96895	1.0783	0.0327396	NaN	1	17	2	2	0.89662	0.95842	-0.0184441	20.367	2
	2315	Tb927.9.8950	Tb927.9.8950		CAAX prenyl protease 1, putative,metallo- peptidase, Clan M- Family M48	48.904	27.9	0	39.978	1		0.942524	-0.0257078	0.995863	0.00180034		18.5	6	6	0.793777	0.935104	-0.0291402	8.86	9	24.4	8	8	0.85475	0.95235	-0.0212034	8.0619	12	15	6	6	0.8779	0.9402	-0.0267798	17.363	8
	2240	Tb927.9.4310	Tb927.9.4310		tricarboxylate carrier, putative	35.625	27.8	0	20.489	1	1	1.0609	0.0256731	0.230086	0.638109		17.4	4	4	1.01477	1.20758	0.0819174	25.223	4	17.4	4	4	0.87635	0.98162	-0.0080566	62.885	6	21.4	5	5	0.93639	1.0073	0.00315883	37.883	5
	1197	Tb927.2.5210	Tb927.2.5210		3-oxoacyl-ACP reductase, putative	25.671	27.8	0	31.563	1	1	0.995817	-0.0018204	0.595688	0.224981		24.9	4	4	0.812876	0.975515	-0.0107662	5.4209	5	13.3	2	2	0.87622	0.98683	-0.00575766	5.3653	3	22.4	4	4	0.94743	1.0258	0.0110627	16.837	5
	416	Tb927.10.14860	Tb927.10.14860		hypothetical protein, conserved	83.434	27.8	0	95.856	1	1	1.00316	0.00136991	0.381897	0.418054		23.7	13	13	0.825491	0.984931	-0.00659441	17.17	13	16.8	10	10	0.89668	1.013	0.00560945	19.04	11	24.4	14	14	0.94435	1.0118	0.00509468	13.759	15
	1789	Tb927.7.3590	Tb927.7.3590		hypothetical protein, conserved	16.847	27.8	0	9.0143	1	1	0.946933	-0.0236808	0.756225	0.121349		0	0	0	NaN	NaN		NaN	0	21.9	2	2	0.87869	0.99791	-0.000908625	11.036	2	6	1	1	0.84247	0.89856	-0.0464529	NaN	1
	934	Tb927.11.2950	Tb927.11.2950	TbNup89	Nucleoporin (TbNup89)	89.154	27.8	0	97.029	1		0.961102	-0.0172307	0.994384	0.00244603		18.1	11	11	0.796115	0.953016	-0.0208997	11.949	14	11.7	7	7	0.85089	0.96454	-0.0156798	15.43	7	22.6	15	15	0.89379	0.9658	-0.0151128	14.718	17
	1130	Tb927.11.9700	Tb927.11.9700		nascent polypeptide associated complex alpha subunit, putative	11.406	27.7	0	27.504	1		0.999332	-0.000290231	0.503225	0.298238		15.8	1	1	0.894054	1.07369	0.0308777	NaN	1	15.8	1	1	0.76438	0.86313	-0.0639238	NaN	1	27.7	2	2	0.99019	1.0769	0.0321754	4.6554	2
	1485	Tb927.5.1630	Tb927.5.1630		hypothetical protein, conserved	17.683	27.7	0	14.114	1		0.976313	-0.0104111	0.789785	0.102491		21.4	3	3	0.831808	0.99295	-0.00307258	3.8665	4	27.7	4	4	0.89046	1.0062	0.00268431	15.136	3	21.4	3	3	0.87072	0.93144	-0.0308451	2.3206	4
	1787	Tb927.7.3520	Tb927.7.3520		mitochondrial pyruvate carrier protein 2, putative	14.849	27.6	0	8.8315	1	1	2.21631	0.345631	0.217983	0.661577		13.4	1	1	0.85492	0.998402	-0.00069434	NaN	1	14.2	1	1	10.204	11.511	1.06111	NaN	1	13.4	1	1	0.86946	0.94727	-0.0235262	NaN	1
	1246	Tb927.3.2150	Tb927.3.2150		protein phosphatase 2C, putative	40.009	27.6	0	57.252	1	1	1.02159	0.00927612	0.32678	0.485744		11	3	3	0.791139	0.948677	-0.0228818	9.5201	5	27.6	7	7	0.9103	1.0287	0.0122887	15.607	9	18	5	5	1.0086	1.0925	0.0384214	10.144	7
	849	Tb927.11.15640	Tb927.11.15640	MERS1	mitochondrial RNA binding complex 1 subunit,NUDIX hydrolase, conserved	44.396	27.6	0	23.015	1	1	0.998881	-0.000486237	0.509627	0.292748		13.4	4	4	0.799041	0.955749	-0.0196562	18.38	5	19.7	6	6	0.96246	1.0844	0.0351895	10.816	5	21.3	5	5	0.88748	0.96163	-0.016992	10.421	4
	700	Tb927.11.10570	Tb927.11.10570		hypothetical protein, conserved	39.513	27.6	0	13.169	1	1	0.892482	-0.0494006	0.888461	0.0513616		16.5	4	4	0.759071	0.893735	-0.0487912	58.102	4	8.7	2	2	0.89278	0.99844	-0.000678028	7.0778	2	12	3	3	0.72672	0.79665	-0.0987324	15.061	3
	1453	Tb927.4.590	Tb927.4.590		hypothetical protein, conserved	88.024	27.5	0	150.42	1		0.978839	-0.00928891	0.795073	0.099593		18.9	10	10	0.792267	0.940557	-0.026615	9.966	10	25.4	12	12	0.8726	0.98911	-0.00475541	19.589	14	21.6	14	14	0.92838	1.0081	0.00350361	6.9002	15
	532	Tb927.10.4130	Tb927.10.4130		NDUFA5/B13 subunit, putative	31.032	27.5	0	51.239	1	1	0.998571	-0.000621095	0.53015	0.275601		13.2	4	4	0.865501	1.02116	0.00909294	1.6146	4	19.6	5	5	0.84343	0.96639	-0.0148476	2.5285	6	27.5	8	8	0.92346	1.009	0.00389117	4.7985	9
	992	Tb927.11.510;Tb927.11.500	Tb927.11.510;Tb927.11.500	UBP1;UBP2	RNA-binding protein, UBP2 (UBP2);RNA-binding protein, UBP1 (UBP1)	19.559	27.4	0	127.47	2		1.00944	0.0040808	0.464723	0.332806		13.1	2	2	0.726111	0.863632	-0.0636711	16.026	3	22.9	3	3	1.0549	1.1949	0.0773316	34.736	3	17.7	3	3	0.92449	0.99674	-0.00141811	11.787	4
	2111	Tb927.9.10560	Tb927.9.10560		hypothetical protein, conserved	19.035	27.4	0	228.74	1	1	1.05379	0.0227554	0.058556	1.23243		13.1	1	1	0.873515	1.03791	0.0161618	4.4129	2	27.4	2	2	0.91019	1.0289	0.0123732	6.0808	3	13.1	1	1	1.0106	1.0958	0.0397313	10.238	2
	1891	Tb927.7.840	Tb927.7.840		hypothetical protein, conserved	14.51	27.4	0	11.318	1	1	1.03883	0.0165438	0.279591	0.553477		18.5	2	2	0.969556	1.15926	0.0641805	20.743	2	18.5	2	2	0.8768	0.98451	-0.00677987	8.455	2	27.4	3	3	0.91458	0.98227	-0.00776912	20.574	3
	1534	Tb927.5.3560	Tb927.5.3560	VAMP	vesicle-associated membrane protein, putative,synaptobrevin, putative (VAMP)	24.402	27.3	0	18.138	1		0.694776	-0.158155	0.813559	0.0896112		11.6	2	2	0.697593	0.818599	-0.0869291	11.14	2	16.2	2	2	0.96698	1.0934	0.0387791	0.94717	2	12.5	2	2	0.34674	0.3747	-0.426316	112.89	2
	1716	Tb927.7.1200	Tb927.7.1200		hypothetical protein, conserved	48.808	27.3	0	119.48	1	1	1.04163	0.0177138	0.106805	0.97141		25.5	8	8	0.843384	1.0087	0.00376417	11.225	9	18	5	5	0.96324	1.0882	0.0367087	8.0989	5	27.3	9	9	0.95151	1.0296	0.0126685	6.113	12
	855	Tb927.11.15910	Tb927.11.15910		iron superoxide dismutase	22.048	27.3	0	15.179	1		1.01128	0.00487284	0.415179	0.381764		22.7	3	3	0.898957	1.07571	0.0316944	6.2631	2	22.7	3	3	0.81496	0.92411	-0.0342763	9.6702	3	27.3	4	3	0.95895	1.0404	0.0172003	5.0152	3
	1657	Tb927.6.410	Tb927.6.410		hypothetical protein, conserved	93.965	27.3	0	93.176	1		0.991662	-0.00363653	0.560921	0.251099		25.5	16	16	0.79885	0.91659	-0.0378247	31.366	15	16.3	10	10	0.92309	1.0825	0.0344279	8.7312	10	19.7	13	13	0.90798	0.98285	-0.00751276	105.87	16
	1776	Tb927.7.3270	Tb927.7.3270		hypothetical protein, conserved	90.386	27.3	0	81.571	1	1	0.974965	-0.011011	0.967131	0.0145148		19.3	12	12	0.828981	0.987752	-0.00535217	24.495	13	14	7	7	0.86027	0.96513	-0.0154142	13.353	10	27.1	17	17	0.90422	0.97215	-0.0122667	33.18	17
	2120	Tb927.9.11000	Tb927.9.11000	RAB7	small GTPase, putative,GTP-binding protein, putative (RAB7)	14.819	27.3	0	18.329	1		0.932885	-0.030172	0.924192	0.0342376		20.1	2	2	0.793462	0.945358	-0.0244036	6.841	2	20.1	2	2	0.86254	0.97601	-0.0105457	13.55	2	17.3	2	2	0.81645	0.8799	-0.0555667	19.299	2
	680	Tb927.11.10020	Tb927.11.10020		short-chain dehydrogenase, putative	33.958	27.2	0	43.578	1		1.0528	0.0223454	0.155812	0.8074		24.6	6	6	0.82447	0.991867	-0.00354673	9.9582	7	20.4	5	5	0.92292	1.0403	0.0171586	18.888	6	18.2	4	4	1.0443	1.1309	0.0534242	17.72	5
	1694	Tb927.6.5130;Tb927.6.5120	Tb927.6.5130;Tb927.6.5120		60S acidic ribosomal protein P2, putative;60S acidic ribosomal protein P2, putative	10.444	27.1	0	15.398	2		1.17114	0.0686091	0.113554	0.944797		19.6	1	1	1.22105	1.40653	0.148149	NaN	1	27.1	2	2	0.93079	1.0594	0.02506	6.5002	2	19.6	1	1	0.98806	1.078	0.0326188	4.5535	2
	1855	Tb927.7.6200	Tb927.7.6200		chaperone protein DNAj, putative	31.594	27.1	0	125.36	1	1	1.12089	0.0495642	0.145083	0.838384		18	3	3	0.809979	0.972195	-0.0122465	15.236	2	18	3	3	1.1379	1.2826	0.108091	28.515	2	27.1	5	5	1.0327	1.1294	0.0528478	40.518	4
	1435	Tb927.4.4350	Tb927.4.4350		hypothetical protein, conserved	23.321	27.1	0	7.7313	1		0.906667	-0.0425523	0.743232	0.128876		27.1	4	4	0.862664	1.03059	0.0130851	3.8649	3	22.7	3	3	0.62896	0.70694	-0.150617	19.77	3	10.8	2	2	0.95792	1.023	0.00987563	4.8252	2
	2152	Tb927.9.12730	Tb927.9.12730		chaperone protein DNAj, putative	48.592	27.1	0	66.915	1	1	0.987015	-0.00567616	0.686176	0.163565		21.3	7	7	0.855066	1.00744	0.00322135	7.7663	10	22.2	6	6	0.84219	0.94266	-0.0256449	10.863	7	23.7	8	8	0.94083	1.0125	0.00539503	7.0647	10
	130	Tb927.7.4810;Tb11.v5.0163	Tb927.7.4810;Tb11.v5.0163		hypothetical protein, conserved;hypothetical protein, conserved	52.176	26.9	0	24.835	2		1.00266	0.00115502	0.48487	0.314375		20.5	6	6	0.821625	0.978761	-0.00932343	20.988	7	18.1	6	6	0.80787	0.91318	-0.0394436	24.128	5	20.5	6	6	1.0212	1.1278	0.0522321	30.222	6
	1001	Tb927.11.540	Tb927.11.540	ABCB10	ABC transporter, putative (ABCB10)	76.244	26.9	0	97.966	1		1.01107	0.00478038	0.26245	0.580953		22.7	9	9	0.826241	0.984834	-0.00663719	13.69	12	22.1	9	9	0.91	1.014	0.00603795	9.9201	10	22.6	10	10	0.95094	1.035	0.0149403	19.669	12
	1731	Tb927.7.1730;Tb927.7.1750;Tb927.7.1740	Tb927.7.1730;Tb927.7.1750;Tb927.7.1740		60S ribosomal protein L7, putative;60S ribosomal protein L7, putative;60S ribosomal protein L7, putative	27.713	26.9	0	26.314	3		0.961141	-0.0172131	0.82397	0.0840886		14.9	3	3	0.799744	0.95648	-0.0193241	12.158	3	26.9	5	5	0.90573	1.0199	0.00855759	8.9135	6	8.3	2	2	0.83964	0.91018	-0.0408727	2.4817	3
	821	Tb927.11.14700	Tb927.11.14700		hypothetical protein, conserved	61.94	26.9	0	93.379	1	1	1.02221	0.00954202	0.265244	0.576355		24.3	8	8	0.90212	1.07112	0.0298393	44.036	8	15.5	5	5	0.91326	1.0294	0.0125842	37.776	5	20.5	6	6	0.88562	0.96873	-0.0137973	7.3375	7
	2233	Tb927.9.3640	Tb927.9.3640		hypothetical protein, conserved	22.632	26.8	0	92.398	1	1	0.997118	-0.00125323	0.532407	0.273756		22.7	3	3	0.834724	0.98174	-0.00800369	2.1244	3	22.7	3	3	0.84313	0.95329	-0.020775	5.5189	3	26.8	5	5	0.98037	1.0593	0.025019	15.591	5
	1667	Tb927.6.4270	Tb927.6.4270		hypothetical protein, conserved	27.15	26.7	0	13.952	1		1.00873	0.00377327	0.470283	0.32764		16.9	3	3	1.14826	1.17854	0.0713429	9.1565	3	5.9	1	1	0.74571	0.82984	-0.0810056	NaN	1	15.7	2	2	0.97798	1.0495	0.0209824	7.422	3
	1810	Tb927.7.4210	Tb927.7.4210		hypothetical protein, conserved	13.418	26.7	0	16.454	1	1	0.783976	-0.105697	0.822153	0.0850473		19	1	1	0.746826	0.896218	-0.0475864	NaN	1	19.8	2	2	0.46158	0.52489	-0.279932	95.607	2	25.9	2	2	0.94749	1.0243	0.0104272	5.259	2
	350	Tb927.10.12540	Tb927.10.12540	NDUFS1	electron transfer protein, putative,ferredoxin, putative	33.754	26.7	0	34.04	1	1	1.02772	0.0118735	0.123762	0.907413		22.1	4	4	0.833959	0.99453	-0.00238207	8.264	5	22.1	4	4	0.92736	1.0522	0.0220983	11.778	5	26.7	5	5	0.942	1.0373	0.0159044	10.533	8
	1616	Tb927.6.2510	Tb927.6.2510		hypothetical protein, conserved	16.92	26.7	0	38.313	1	1	0.984365	-0.00684406	0.87251	0.0592295		20.5	2	2	0.828706	0.985707	-0.00625207	7.9327	2	26	3	3	0.88323	1.0008	0.000347297	5.8001	3	26.7	3	3	0.8921	0.96688	-0.0146274	5.1299	4
	327	Tb927.9.6070;Tb927.10.11540	Tb927.9.6070;Tb927.10.11540	RPS3;RPS3	40S ribosomal protein S3, putative (RPS3);40S ribosomal protein S3, putative (RPS3)	24.216	26.6	0	13.172	2		1.36393	0.134792	0.225499	0.646856		22.9	5	5	0.80952	0.966931	-0.0146045	12.994	6	4.2	1	1	2.3343	2.6605	0.424963	NaN	1	21	5	5	0.91022	0.98632	-0.00598216	6.025	4
	218	Tb927.8.2470;Tb11.v5.0799	Tb927.8.2470;Tb11.v5.0799		hypothetical protein, conserved;hypothetical protein, conserved	11.223	26.6	0	13.536	2	1	0.933293	-0.0299821	0.660884	0.179875		0	0	0	NaN	NaN		NaN	0	26.6	2	2	0.7299	0.82383	-0.0841624	31.587	2	11.7	1	1	0.97591	1.0573	0.0241982	NaN	1
	2128	Tb927.9.11410;Tb927.9.11380	Tb927.9.11410;Tb927.9.11380		unspecified product;unspecified product	14.962	26.6	0	8.2853	2		0.96643	-0.0148295	0.585375	0.232566		20.1	2	2	1.04988	1.24289	0.0944309	19.742	2	20.1	2	2	0.68567	0.7682	-0.114526	13.265	2	26.6	3	3	0.88185	0.94538	-0.0243936	25.585	3
	1158	Tb927.2.2970	Tb927.2.2970	MCP13	mitochondrial carrier protein (MCP13)	33.962	26.6	0	25.295	1	1	0.99855	-0.000630202	0.509502	0.292854		16.7	4	4	0.821153	0.974754	-0.011105	15.973	4	23.1	5	5	0.97639	1.1071	0.0441869	7.8206	5	21.2	5	5	0.829	0.92263	-0.0349724	19.684	5
	981	Tb927.11.4780	Tb927.11.4780		pyruvate dehydrogenase (lipoamide) kinase, putative	51.187	26.5	0	38.553	1	1	0.981684	-0.00802814	0.759291	0.119592		18.7	6	6	0.800705	0.959601	-0.0179094	32.586	6	22.5	7	7	0.85672	0.96193	-0.0168565	12.605	7	20.2	7	7	0.94577	1.0249	0.0106815	6.9943	8
	635	Tb927.10.8240	Tb927.10.8240		hypothetical protein, conserved	42.845	26.5	0	64.329	1		0.933192	-0.0300292	0.921909	0.0353122		17.9	6	6	0.770832	0.917852	-0.0372272	15.961	6	8.6	3	3	0.78465	0.89336	-0.0489735	7.7894	3	20.6	6	6	0.89224	0.99109	-0.00388691	8.1035	7
	1117	Tb927.11.9510	Tb927.11.9510		nucleic acid binding protein, putative	56.606	26.4	0	46.231	1		1.1417	0.0575525	0.183529	0.736295		19	6	6	0.837381	0.999201	-0.000347314	10.835	6	4.7	2	2	1.2723	1.4343	0.15664	34.947	2	19.2	8	8	0.94412	1.0384	0.0163647	13.25	10
	2325	Tb927.9.9550	Tb927.9.9550		hypothetical protein, conserved	24.509	26.4	0	15.018	1		1.04516	0.0191815	0.29443	0.531019		8	2	2	0.779545	0.925497	-0.0336248	1.3323	2	10.8	3	3	1.0384	1.1763	0.0705181	64.917	3	21.2	4	4	0.97894	1.0487	0.0206513	27.289	4
	1273	Tb927.3.3450	Tb927.3.3450	arl3	ADP-ribosylation factor-like protein 3A, putative	19.881	26.4	0	66.258	1		0.966485	-0.0148047	0.753953	0.122656		26.4	4	4	0.764818	0.900414	-0.0455577	16.599	4	26.4	4	4	0.85422	0.96649	-0.0148026	5.1633	4	26.4	4	4	0.97016	1.0374	0.0159462	15.76	5
	2316	Tb927.9.9000	Tb927.9.9000	idi1	isopentenyl-diphosphate delta-isomerase (type II), putative	38.986	26.4	0	79.817	1		0.991718	-0.00361199	0.545762	0.262997		17.1	5	5	0.946432	1.12661	0.0517728	12.952	5	24.2	6	6	0.83339	0.93908	-0.0272974	10.985	7	18.8	6	6	0.85677	0.92191	-0.0353115	10.902	7
	1938	Tb927.8.2460	Tb927.8.2460		hypothetical protein, conserved	30.901	26.4	0	76.611	1		1.01372	0.0059164	0.303062	0.518468		19.7	4	4	0.875657	1.04901	0.0207796	9.5061	5	19.7	4	4	0.90883	1.022	0.0094509	10	6	26.4	5	5	0.90979	0.97167	-0.0124812	20.033	7
	311	Tb927.10.11050	Tb927.10.11050		hypothetical protein, conserved	35.053	26.3	0	17.905	1	1	1.00798	0.00345163	0.388738	0.410343		19.2	5	5	0.811622	0.961261	-0.0171586	13.664	7	10.6	2	2	0.9054	1.0205	0.00881301	17.456	4	15.1	4	4	0.96594	1.044	0.0187005	75.696	5
	395	Tb927.10.14040	Tb927.10.14040		vacuolar ATP synthase subunit c, putative	43.414	26.3	0	42.752	1		0.948263	-0.0230713	0.71218	0.14741		23.4	7	7	0.909173	1.08831	0.0367506	23.774	6	18.2	5	5	0.84137	0.9503	-0.0221393	41.689	5	18.2	6	6	0.77027	0.82447	-0.0838251	18.27	7
	832	Tb927.11.15040	Tb927.11.15040	Cpn60	chaperonin HSP60, mitochondrial precursor, putative,heat shock protein 60 (Cpn60)	64.159	26.3	0	129.53	1	1	0.974281	-0.011316	0.970131	0.0131698		21.4	8	8	0.825423	0.969932	-0.0132587	8.9075	8	17.2	9	9	0.87529	0.98715	-0.00561685	3.8387	11	23.4	11	11	0.90529	0.96589	-0.0150723	7.3274	12
	1442	Tb927.4.4610	Tb927.4.4610		hypothetical protein, conserved	34.626	26.3	0	31.572	1		0.956958	-0.0191073	0.762816	0.11758		22.6	4	4	0.859328	1.03277	0.0140036	3.0269	4	18.2	3	3	0.86321	0.97517	-0.0109197	12.333	4	8.5	2	2	0.81439	0.87015	-0.0604059	12.952	2
	2312	Tb927.9.8740	Tb927.9.8740	DRBD3	RNA-binding protein (DRBD3)	36.984	26.3	0	140.99	1		1.02115	0.00909092	0.187223	0.727641		13.5	4	4	0.889126	1.05567	0.0235261	12.044	4	23.5	6	6	0.90493	1.0184	0.00791839	13.999	7	23.5	6	6	0.90513	0.99044	-0.00417183	3.0429	10
	1910	Tb927.8.1470	Tb927.8.1470		hypothetical protein, conserved	62.304	26.3	0	160.33	1		0.99643	-0.00155336	0.54311	0.265112		22.5	7	7	0.883939	1.0533	0.0225508	8.7367	9	15.6	5	5	0.87266	0.98466	-0.0067137	2.7533	6	26.3	9	9	0.89158	0.9539	-0.0204972	7.2457	9
	423	Tb927.10.1510	Tb927.10.1510	NOT1	NOT1 (NOT1)	259.12	26.2	0	320.32	1		1.04064	0.0173013	0.199993	0.698984		17.2	31	31	0.817394	0.968898	-0.0137218	22.21	31	13.4	24	24	0.93108	1.057	0.024075	18.842	27	19.9	35	35	1.0168	1.1004	0.0415506	14.729	37
	614	Tb927.10.7570;Tb11.v5.0774	Tb927.10.7570;Tb11.v5.0774		dihydrolipoamide acetyltransferase E2 subunit, putative;dihydrolipoamide acetyltransferase precursor, putative	48.107	26.2	0	72.805	2	1	1.02219	0.00953263	0.256729	0.590526		23.3	7	7	0.807298	0.966838	-0.0146465	19.838	8	20.6	6	6	0.92871	1.0486	0.0206099	6.6668	6	21.3	7	7	0.98376	1.0535	0.0226345	10.631	9
	624	Tb927.10.8020	Tb927.10.8020	POP	prolyl oligopeptidase, putative,serine peptidase clan SC, family S9A, putative (POP)	77.624	26.2	0	46.6	1	1	1.0118	0.00509471	0.389215	0.40981		16	9	9	0.805283	0.967492	-0.0143525	34.711	9	17.3	9	9	0.87209	0.9843	-0.00687251	10.827	10	23.2	12	12	0.99916	1.0877	0.0365091	13.78	14
	1416	Tb927.4.3660	Tb927.4.3660		hypothetical protein, conserved	54.816	26.2	0	32.306	1		1.04632	0.0196626	0.0831466	1.08016		9.4	3	3	0.854847	1.01196	0.00516378	11.848	3	17.5	5	5	0.93735	1.0883	0.0367486	15.838	4	21.8	7	7	0.97038	1.0401	0.0170751	22.61	7
	901	Tb927.11.1950	Tb927.11.1950		hypothetical protein, conserved	24.799	26.1	0	18.638	1	1	1.00903	0.00390602	0.469593	0.328278		9.5	2	2	1.00275	1.1829	0.072948	36.674	2	14	2	2	0.73047	0.82888	-0.0815083	NaN	1	11.7	2	2	0.96839	1.0478	0.0202784	19.329	2
	123	Tb11.1420;Tb11.1370;Tb927.11.1850	Tb11.1420;Tb11.1370;Tb927.11.1850		hypothetical protein,chrXI additional, unordered contigs;hypothetical protein, conserved;hypothetical protein, conserved	50.917	26.1	0	24.688	3	1	0.98264	-0.00760574	0.56924	0.244705		14.3	5	5	0.685542	0.827062	-0.0824622	42.88	4	9.1	3	3	0.99392	1.1096	0.0451664	10.592	3	19.5	7	7	0.94148	1.0339	0.0144785	12.725	7
	783	Tb927.11.13580	Tb927.11.13580		ubiquinone biosynthesis protein-like protein	27.93	26.1	0	39.307	1	1	1.02397	0.0102876	0.314336	0.502605		19.3	3	3	0.803471	0.956023	-0.0195317	32.551	6	22.9	4	4	0.97858	1.1047	0.0432444	5.6702	4	16.9	3	3	0.93427	1.0166	0.00715011	44.001	3
	2049	Tb927.8.6440	Tb927.8.6440	RPB20	RNA-binding protein, putative (RPB20)	20.37	26.1	0	15.621	1		0.933773	-0.0297585	0.944459	0.0248167		26.1	3	3	0.753466	0.897022	-0.047197	19.491	3	26.1	3	3	0.87141	0.97752	-0.00987435	7.9099	3	26.1	3	3	0.85462	0.92853	-0.0322041	6.3187	3
	753	Tb927.11.1250	Tb927.11.1250		kinteoplast poly(A) polymerase complex 1 subunit,mitochondrial edited mRNA stability factor 1 subunit	98.264	26.1	0	47.736	1	1	1.01257	0.0054246	0.300785	0.521744		12.5	7	7	0.891981	1.05301	0.0224317	14.191	8	13.5	6	6	0.8683	0.98356	-0.00719914	8.8911	8	16.6	11	11	0.92256	1.0024	0.00104106	16.796	13
	1300	Tb927.3.4420	Tb927.3.4420		hypothetical protein, conserved	49.984	26	0	34.155	1		0.963065	-0.0163444	0.636053	0.196507		13.1	5	5	0.833681	0.976562	-0.0103	53.439	5	12.9	4	4	0.71697	0.8129	-0.0899629	17.21	4	21	7	7	1.0467	1.1252	0.0512297	24.931	6
	1419	Tb927.4.3690	Tb927.4.3690		hypothetical protein, conserved	48.527	26	0	75.253	1	1	0.975981	-0.0105586	0.805982	0.0936744		17.1	5	5	0.846167	1.01597	0.00688131	25.649	5	10.3	3	3	0.86131	0.97247	-0.0121238	26.025	3	25.7	7	7	0.85574	0.94095	-0.0264335	11.657	8
	2218	Tb927.9.2650	Tb927.9.2650		hypothetical protein, conserved	66.517	25.9	0	40.862	1		1.0067	0.00290168	0.462117	0.335248		20.3	6	6	0.747105	0.889363	-0.0509208	6.0249	6	17	5	5	0.93732	1.0616	0.0259609	7.312	5	22.1	7	7	0.99488	1.0806	0.033665	45.128	7
	2317	Tb927.9.9060	Tb927.9.9060		Lsm12 protein, putative	21.06	25.8	0	12.464	1		1.09639	0.0399665	0.214856	0.667853		25.8	4	4	0.780335	0.920641	-0.0359098	2.5935	4	14.7	3	3	0.99513	1.1281	0.0523476	11.76	3	25.8	4	4	1.1767	1.269	0.103462	4.3953	3
	1375	Tb927.4.2040	Tb927.4.2040	ALBA3	ALBA-Domain Protein (ALBA3)	20.808	25.8	0	95.289	1		0.973556	-0.0116392	0.579688	0.236805		25.3	4	2	0.660589	0.790576	-0.102056	29.716	3	25.3	5	3	1.0419	1.1868	0.0743775	14.223	5	24.7	3	1	0.91845	0.98347	-0.00723888	11.028	2
	295	Tb927.10.10390	Tb927.10.10390		trypanothione reductase	53.156	25.8	0	36.088	1	1	1.00417	0.0018074	0.480334	0.318457		14.4	4	4	0.725479	0.864753	-0.0631081	6.8741	3	16.7	4	4	0.95017	1.0786	0.0328604	32.269	5	25.8	8	8	0.99321	1.0856	0.0356698	10.054	6
	403	Tb927.10.14350	Tb927.10.14350		hypothetical protein, conserved	10.907	25.8	0.004529	2.0598	1	1	0.93776	-0.0279082	0.814194	0.0892719		0	0	0	NaN	NaN		NaN	0	16.5	1	1	0.78512	0.89879	-0.0463418	NaN	1	25.8	2	2	0.91539	0.97842	-0.00947468	5.9564	2
	1805	Tb927.7.4070;Tb927.7.4060	Tb927.7.4070;Tb927.7.4060		calpain-like cysteine peptidase, putative,cysteine peptidase, Clan CA, family C2, putative;calpain-like cysteine peptidase, putative,cysteine peptidase, Clan CA, family C2, putative	13.518	25.8	0	50.233	2		0.985603	-0.00629807	0.552899	0.257355		25.8	2	2	0.97144	1.15459	0.062427	16.326	2	25.8	2	2	0.88843	1.0017	0.000737674	2.8599	2	25.8	2	2	0.76997	0.82783	-0.0820588	7.8619	2
	578	Tb927.10.600	Tb927.10.600		hypothetical protein, conserved	62.775	25.7	0	35.966	1	1	1.06521	0.0274358	0.177982	0.749624		14	5	5	0.981836	1.16133	0.0649564	11.055	7	13.9	5	5	0.95238	1.0761	0.0318526	8.4175	6	18.9	8	8	0.88584	0.96716	-0.0145017	16.842	8
	1420	Tb927.4.3740	Tb927.4.3740	FAZ1	flagellar attachment zone protein (FAZ1)	192.57	25.7	0	86.025	1		1.0193	0.00830398	0.140674	0.851785		23.4	9	9	0.853825	1.01619	0.00697406	12.522	9	20.6	5	5	0.88633	0.99815	-0.000804189	5.2278	5	25	11	11	0.96893	1.0441	0.0187421	18.138	12
	715	Tb927.11.11050	Tb927.11.11050		hypothetical protein, conserved	37.475	25.7	0	79.617	1	1	1.01647	0.00709409	0.181518	0.74108		20.4	5	5	0.833056	0.997805	-0.000954411	9.7057	10	20.4	5	5	0.92041	1.0447	0.0189916	6.4072	6	25.7	7	7	0.93907	1.0075	0.00324505	8.962	12
	168	Tb927.10.16170;Tb11.v5.0396	Tb927.10.16170;Tb11.v5.0396		potassium voltage-gated channel, putative;potassium voltage-gated channel, putative	34.606	25.7	0	28.532	2	1	0.969647	-0.0133865	0.768042	0.114615		15.6	4	4	0.783576	0.935016	-0.0291808	11.229	5	16	5	5	0.91062	1.0385	0.0164065	3.4331	6	17.6	4	4	0.87165	0.93889	-0.0273853	65.762	5
	374	Tb927.10.1340	Tb927.10.1340		hypothetical protein, conserved	60.644	25.7	0	50.602	1	1	0.983872	-0.00706121	0.857503	0.0667643		12.6	5	5	0.821895	0.966931	-0.0146045	14.831	5	15.9	6	6	0.87673	0.98026	-0.00865872	11.45	7	11.5	5	5	0.92573	1.0048	0.00207963	14.343	5
	678	Tb927.10.9970	Tb927.10.9970		hypothetical protein, conserved	110	25.7	0	149.68	1	1	1.00977	0.00422282	0.424253	0.372375		19.2	15	15	0.919371	1.10401	0.0429726	15.234	15	18.1	13	13	0.84652	0.95786	-0.018698	19.409	13	20.7	16	16	0.90688	0.97363	-0.0116061	16.591	17
	1826	Tb927.7.5130	Tb927.7.5130		hypothetical protein, conserved	26.377	25.6	0	98.586	1	1	1.06103	0.0257266	0.0663763	1.17799		20.6	4	4	0.868734	1.04783	0.0202925	17.58	5	17.2	3	3	0.91876	1.0256	0.010978	12.716	3	11.3	3	3	1.025	1.1115	0.0459095	10.812	3
	1312	Tb927.3.4820	Tb927.3.4820		acyltransferase, putative	34.629	25.6	0	39.621	1		0.902792	-0.0444123	0.902326	0.0446365		14.1	2	2	0.68306	0.812612	-0.0901169	3.3573	2	16.4	3	3	0.81381	0.9371	-0.0282141	6.841	4	13.1	2	2	0.88897	0.96626	-0.014906	4.8598	2
	1719	Tb927.7.1290	Tb927.7.1290		hypothetical protein, conserved	26.998	25.6	0	107.39	1		0.980386	-0.00860284	0.924678	0.0340095		4.5	1	1	0.819068	0.967212	-0.0144785	NaN	1	21.1	2	2	0.87049	0.99645	-0.00154449	10.882	2	10.7	2	2	0.88638	0.97772	-0.0097855	15.79	2
	1364	Tb927.4.1540	Tb927.4.1540		hypothetical protein, conserved	55.24	25.6	0	163.87	1		1.01128	0.00487222	0.219691	0.658188		19.9	6	6	0.864753	1.02721	0.0116597	15.693	8	21.7	7	7	0.90446	1.0187	0.00804631	11.548	8	25.6	9	9	0.90494	0.98835	-0.00508923	32.203	11
	306	Tb927.10.10830	Tb927.10.10830	RGG2	RGG2 (RGG2)	32.404	25.6	0	89.906	1	1	0.994764	-0.00228007	0.662131	0.179056		21.9	6	6	0.849257	0.992851	-0.0031157	25.229	8	21.9	6	6	0.89601	1.0145	0.00625205	16.543	8	24.4	6	6	0.88858	0.97729	-0.00997655	16.967	8
	1799	Tb927.7.3950	Tb927.7.3950	KRET1	RNA-editing complex protein,RNA-editing 3 terminal uridylyl transferase 1,KRET1 (KRET1)	107.38	25.5	0	185.48	1	1	1.00736	0.0031832	0.430067	0.366464		23.3	16	16	0.84631	1.00708	0.00306397	11.793	16	20.6	13	13	0.95179	1.0736	0.0308425	13.98	13	19.5	12	12	0.88275	0.94546	-0.0243568	17.212	12
	2070	Tb927.8.7120	Tb927.8.7120		squalene synthase, putative	51.478	25.4	0	40.091	1		1.08637	0.0359776	0.23121	0.635993		19.1	6	6	0.788768	0.943396	-0.0253058	12.228	7	20.4	7	7	0.94068	1.0528	0.0223459	9.722	8	25.4	10	10	1.1738	1.2909	0.110893	8.2006	12
	1809	Tb927.7.4180	Tb927.7.4180		fatty acid elongase, putative	33.87	25.2	0	81.981	1		1.02464	0.0105706	0.0950356	1.02211		22	5	5	0.831393	1.00119	0.000516937	6.0814	7	22	5	5	0.92454	1.0449	0.0190747	5.1561	7	21.6	5	5	0.95415	1.0283	0.0121198	5.4372	6
	1330	Tb927.3.5370	Tb927.3.5370		hypothetical protein, conserved	34.254	25.2	0	55.527	1		0.924838	-0.0339343	0.83182	0.0799709		10.5	2	2	0.729874	0.850123	-0.0705181	16.166	2	12.1	2	2	0.91054	1.0444	0.0188669	27.285	2	24.9	5	5	0.8154	0.89094	-0.0501515	7.3213	6
	485	Tb927.10.2810	Tb927.10.2810		hypothetical protein, conserved	38.589	25.1	0	40.174	1		1.03703	0.0157895	0.386862	0.412444		11.2	3	3	0.763884	0.911826	-0.0400878	5.925	5	7.7	2	2	1.1409	1.2926	0.111464	31.894	2	25.1	7	7	0.87106	0.94622	-0.0240079	24.25	8
	400	Tb927.10.14180	Tb927.10.14180		protein transport protein SEC13, putative,cytosolic coat protein, putative	41.675	25.1	0	69.231	1		1.00417	0.00180706	0.46509	0.332463		25.1	8	8	0.777363	0.924471	-0.0341068	9.6098	7	15	5	5	0.91974	1.0329	0.0140583	93.825	4	15.8	5	5	0.9772	1.0604	0.0254697	12.53	5
	684	Tb927.11.1010	Tb927.11.1010		chaperone protein DNAj, putative	41.739	25.1	0	13.644	1	1	1.08041	0.0335891	0.127656	0.89396		20.5	4	4	0.946522	1.14309	0.0580812	11.288	4	14	3	3	0.99658	1.1259	0.0514998	19.523	3	10.8	3	3	0.89756	0.97991	-0.00881381	47.787	3
	2292	Tb927.9.7540	Tb927.9.7540		calpain-like cysteine peptidase, putative,cysteine peptidase, Clan CA, family C2, putative	95.448	25.1	0	60.039	1		0.968352	-0.0139667	0.755509	0.12176		12.6	7	7	0.864304	1.03949	0.0168203	28.903	7	11.1	7	7	0.8576	0.9582	-0.0185438	6.4021	6	22.4	13	13	0.85172	0.91164	-0.0401766	8.1238	13
	864	Tb927.11.16170	Tb927.11.16170		hypothetical protein, conserved	22.601	25	0	5.4426	1		0.843944	-0.0736864	0.711412	0.147879		0	0	0	NaN	NaN		NaN	0	25	2	2	0.93194	1.0482	0.0204442	4.7678	2	14	1	1	0.63338	0.67949	-0.167817	NaN	1
	560	Tb927.10.5370;Tb927.10.5360	Tb927.10.5370;Tb927.10.5360		40S ribosomal protein S10, putative;40S ribosomal protein S10, putative	19.285	25	0	16.325	2		1.0024	0.00104316	0.481509	0.317396		25	4	4	0.789266	0.915667	-0.0382624	3.0603	3	24.4	3	3	0.91448	1.035	0.0149403	4.6504	3	16.9	3	3	0.98823	1.0628	0.0264515	2.1891	2
	1327	Tb927.3.5310	Tb927.3.5310		paraflagellar rod protein	242.78	25	0	29.403	1		1.04133	0.017587	0.264855	0.576991		14	1	1	0.95511	1.08867	0.0368971	NaN	1	0	0	0	NaN	NaN		NaN	0	25	3	3	0.92469	0.99604	-0.00172322	9.0015	3
	1651	Tb927.6.4000	Tb927.6.4000	SGT	small glutamine-rich tetratricopeptide repeat protein, putative (SGT)	45.966	25	0	88.103	1		0.98097	-0.00834421	0.658745	0.181283		17.3	5	5	0.779302	0.904895	-0.0434016	5.4828	2	11.5	3	3	0.89202	1.014	0.00603795	3.6463	4	19.7	6	6	0.95335	1.0288	0.012331	35.305	6
	2026	Tb927.8.5880	Tb927.8.5880		eukaryotic translation initiation factor 1A, putative	19.445	25	0	19.998	1		0.885457	-0.0528325	0.883014	0.0540323		17.4	2	2	0.67792	0.804635	-0.0944012	6.8138	2	25	3	3	0.90907	1.02	0.00860017	5.1605	2	17.4	2	2	0.77488	0.84587	-0.0726964	18.02	2
	2015	Tb927.8.5560	Tb927.8.5560		hypothetical protein, conserved	59.988	25	0	36.725	1	1	0.936422	-0.0285283	0.910484	0.0407279		15.4	6	6	0.785731	0.934841	-0.029262	4.9088	7	10.5	4	4	0.79581	0.88623	-0.0524536	15.736	5	19.9	7	7	0.90629	0.99113	-0.00386938	28.688	7
	2145	Tb927.9.12510	Tb927.9.12510	DED1	ATP-dependent DEAD/H RNA helicase, putative (DED1)	82.74	25	0	71.551	1	1	0.978064	-0.0096327	0.698092	0.156087		20.3	11	10	0.823452	0.982222	-0.00779043	17.053	11	18	10	9	0.92178	1.0393	0.0167409	15.106	11	19.2	11	10	0.82906	0.91654	-0.0378486	21.829	13
	196	Tb927.8.1640;Tb927.8.1630;Tb927.8.1620;Tb927.8.1610;Tb11.v5.0601	Tb927.8.1640;Tb927.8.1630;Tb927.8.1620;Tb927.8.1610;Tb11.v5.0601		MSP-B, putative;MSP-B, putative;MSP-B, putative;MSP-B, putative;major surface protease gp63, putative	59.905	24.9	0	97.577	5		1.00282	0.00122139	0.35049	0.455324		21.8	7	7	0.838434	1.00046	0.00019973	7.4633	8	22.7	7	7	0.88092	0.99321	-0.00295892	7.4048	8	20.2	7	7	0.94722	1.0149	0.00642325	17.69	11
	538	Tb927.10.430	Tb927.10.430		hypothetical protein, conserved	41.585	24.9	0	55.206	1	1	0.958091	-0.0185931	0.796956	0.0985658		22.5	8	8	0.81813	0.972006	-0.012331	11.379	8	19.6	7	7	0.90559	1.0201	0.00864275	5.1906	6	22.8	8	8	0.81866	0.88697	-0.0520911	7.9674	9
	331	Tb927.10.11870	Tb927.10.11870	MRB11870	mitochondrial RNA binding protein (MRB11870)	34.683	24.8	0	71.573	1	1	1.0083	0.00359102	0.340636	0.46771		21.6	4	4	0.859697	1.02347	0.0100743	18.788	6	17.1	3	3	0.90925	1.0284	0.0121621	5.8521	4	24.8	5	5	0.89901	0.97395	-0.0114633	11.48	7
	1893	Tb927.7.870	Tb927.7.870		hypothetical protein, conserved	40.532	24.8	0	37.713	1	1	0.995533	-0.00194419	0.576472	0.239222		21.2	5	5	0.867378	1.03697	0.0157654	20.175	7	24.2	6	6	0.8658	0.97819	-0.00957678	6.7284	7	13.8	4	4	0.89532	0.9727	-0.0120211	10.986	6
	1583	Tb927.6.1440	Tb927.6.1440		hypothetical protein, conserved	29.996	24.8	0	21.022	1		0.993699	-0.00274499	0.619238	0.208143		17.1	3	3	0.875734	1.01494	0.00644037	28.19	3	17.1	3	3	0.89501	1.0088	0.00380507	1.6285	3	21.3	4	4	0.86353	0.95834	-0.0184804	23.298	5
	1374	Tb927.4.1980	Tb927.4.1980		hypothetical protein, conserved	91.11	24.7	0	84.555	1	1	1.01666	0.00717757	0.367434	0.434821		24.7	14	14	0.785484	0.939673	-0.0270233	17.042	15	11.7	7	7	0.91889	1.0286	0.0122465	18.447	8	19.4	11	11	1.0042	1.0872	0.0363094	25.566	12
	565	Tb927.10.5540	Tb927.10.5540		hypothetical protein, conserved	30.445	24.7	0	25.144	1	1	1.00199	0.000862246	0.465799	0.331801		17.3	7	7	0.829119	0.98912	-0.00475119	7.1795	8	22.1	5	5	0.9275	1.043	0.0182843	73.571	6	19.2	8	8	0.90792	0.97511	-0.0109464	15.257	9
	2306	Tb927.9.8210	Tb927.9.8210		Peptide deformylase 2	42.101	24.6	0	42.614	1	1	0.993436	-0.00286002	0.544464	0.264031		24.6	6	6	0.826446	0.908348	-0.0417479	14.126	7	17.5	4	4	0.8806	0.99188	-0.00354087	7.3853	4	24.3	6	6	1.0089	1.0882	0.0367087	19.181	6
	885	Tb927.11.16760	Tb927.11.16760	TCP-1-alpha	T-complex protein 1, alpha subunit, putative (TCP-1-alpha)	54.623	24.6	0	41.572	1		0.937181	-0.0281763	0.872166	0.0594009		20.2	8	8	0.75815	0.892061	-0.0496056	22.218	8	16	6	6	0.90304	1.017	0.00732095	20.021	8	22.2	9	9	0.84534	0.90731	-0.0422443	21.275	9
	2109	Tb927.9.10500	Tb927.9.10500		hypothetical protein, conserved	59.455	24.6	0	42.701	1	1	0.930676	-0.0312014	0.905113	0.0432971		17.8	7	7	0.799041	0.958957	-0.018201	4.4834	8	21.2	7	7	0.76555	0.86507	-0.0629487	11.144	8	14.9	6	6	0.89714	0.97173	-0.0124544	9.7521	6
	2265	Tb927.9.6060	Tb927.9.6060		2Fe-2S iron-sulfur cluster binding domain containing protein, putative	30.49	24.5	0	39.786	1	1	0.953109	-0.0208575	0.699876	0.154979		15	4	4	0.817795	0.960246	-0.0176176	6.5613	4	19.8	3	3	0.96927	1.0865	0.0360297	12.707	3	10.3	2	2	0.7647	0.82988	-0.0809847	25.99	3
	2314	Tb927.9.8880;Tb927.9.8850	Tb927.9.8880;Tb927.9.8850		actin A;actin A	41.895	24.5	0	19.495	2		0.998446	-0.000675536	0.523511	0.281074		9	4	4	0.809323	0.953562	-0.0206512	11.66	5	10.4	3	3	0.91351	1.029	0.0124154	12.605	3	16.8	5	5	0.9426	1.0144	0.00620924	7.8924	5
	1849	Tb927.7.5940	Tb927.7.5940	PAD2	Protein Associated with Differentiation (TbPAD2)	67.151	24.5	0	252.14	1		1.02823	0.0120889	0.204007	0.690354		17.4	6	2	0.857486	0.996214	-0.00164723	2.9279	4	22.6	8	4	0.95786	1.0845	0.0352296	12.449	7	17.5	6	3	0.93175	1.0062	0.00268431	0.59832	5
	1774	Tb927.7.320	Tb927.7.320	TbRBP8	hypothetical protein, conserved (TbRBP8)	20.27	24.4	0	23.108	1		1.04835	0.0205068	0.198422	0.702409		15.6	2	2	0.822301	0.970685	-0.0129215	1.44	2	15.6	2	2	0.99593	1.1311	0.053501	14.341	2	24.4	3	3	0.95083	1.0494	0.0209411	6.2126	3
	1907	Tb927.8.1370	Tb927.8.1370		hypothetical protein, conserved	19.847	24.4	0	26.25	1	1	0.999641	-0.000156131	0.501897	0.299385		0	0	0	NaN	NaN		NaN	0	24.4	2	2	0.94484	1.0618	0.0260427	35.864	2	10.1	1	1	0.85813	0.94112	-0.026355	NaN	1
	406	Tb927.10.1450	Tb927.10.1450		hypothetical protein, conserved	329.64	24.4	0	39.196	1		0.926083	-0.0333502	0.782349	0.1066		12.2	2	2	0.846525	1.00002	8.6858e-06	6.2277	3	13.6	2	2	0.70858	0.79019	-0.102268	7.172	2	19.7	3	3	0.91234	1.0051	0.00220927	5.8034	3
	651	Tb927.10.8980	Tb927.10.8980		hypothetical protein, conserved	17.598	24.3	0	10.994	1	1	1.03473	0.0148255	0.234895	0.629126		17.2	2	2	0.89815	1.06735	0.0283069	2.0945	3	0	0	0	NaN	NaN		NaN	0	15.4	2	2	0.93065	1.0031	0.00134423	3.3834	2
	1141	Tb927.11.9930	Tb927.11.9930		NADH-ubiquinone oxidoreductase complex I subunit, putative	30.327	24.2	0	9.3864	1	1	1.05938	0.02505	0.383174	0.416604		15.2	3	3	0.73692	0.872905	-0.059033	34.566	3	13.3	2	2	0.80881	0.91669	-0.0377775	12.654	3	15.2	3	3	1.3745	1.4858	0.17196	34.394	4
	183	Tb927.10.6880;Tb11.v5.0516	Tb927.10.6880;Tb11.v5.0516	GAP	glyceraldehyde 3-phosphate dehydrogenase, cytosolic (GAP);glyceraldehyde 3-phosphate dehydrogenase, cytosolic, putative	35.61	24.2	0	6.8895	2		1.07026	0.0294882	0.267417	0.572811		8.5	2	2	0.841255	0.992162	-0.00341745	9.8353	2	22.1	5	4	1.0249	1.1545	0.0623939	18.039	5	4.5	2	0	NaN	NaN		NaN	0
	900	Tb927.11.1900	Tb927.11.1900		T-complex protein 1, beta subunit, putative	58.057	24.2	0	32.474	1		0.985855	-0.00618717	0.675129	0.170613		14.4	6	6	0.789141	0.939938	-0.0269008	26.258	5	11.9	4	4	0.90394	1.0318	0.0135955	13.136	4	17.6	6	6	0.91355	0.98797	-0.00525624	9.8495	6
	1650	Tb927.6.3930	Tb927.6.3930		hypothetical protein, conserved	49.246	24.2	0	32.209	1	1	1.02014	0.00865865	0.320934	0.493584		18.8	6	6	0.89662	1.06883	0.0289099	9.6142	6	18.8	6	6	0.9266	1.0469	0.0199052	2.6009	6	24.2	8	8	0.87012	0.94877	-0.0228391	13.139	9
	685	Tb927.11.10140	Tb927.11.10140		hypothetical protein, conserved	30.3	24.2	0	27.182	1	1	0.996737	-0.00141954	0.527334	0.277915		20.8	4	4	0.904895	1.08438	0.0351795	28.539	5	20.8	4	4	0.85021	0.9599	-0.017774	4.248	5	7.8	2	2	0.88418	0.95134	-0.0216642	8.662	3
	1393	Tb927.4.2530	Tb927.4.2530		hypothetical protein, conserved	16.835	24.1	0	20.966	1		1.09425	0.0391148	0.167567	0.775811		13.3	2	2	1.05254	1.25715	0.0993871	29.424	3	24.1	3	3	0.87541	0.99051	-0.00414114	12.751	4	13.3	2	2	0.98103	1.0522	0.0220983	26.402	3
	1536	Tb927.5.3640	Tb927.5.3640		hypothetical protein, conserved	30.64	24.1	0	13.623	1	1	1.09513	0.0394648	0.16968	0.77037		8.9	2	2	1.02035	1.22393	0.0877566	9.0692	3	16.7	3	3	0.81613	1.1244	0.0509208	12.318	3	16.3	4	4	0.88556	0.95437	-0.0202832	16.774	4
	383	Tb927.10.13720	Tb927.10.13720	RBP29	RNA-binding protein, putative (RBP29)	40.678	24.1	0	65.92	1		1.0024	0.00103992	0.472074	0.325989		12.7	3	3	0.793399	0.946432	-0.0239106	2.7166	3	19.1	6	6	0.93302	1.0488	0.0206927	4.0518	6	21	6	6	0.92001	1.0147	0.00633766	7.8772	6
	1592	Tb927.6.1860	Tb927.6.1860		hypothetical protein, conserved	30.977	24.1	0	20.604	1	1	0.95557	-0.0197373	0.683806	0.165067		15.7	3	3	0.905551	1.05896	0.0248808	10.834	3	24.1	5	5	0.8951	1.0124	0.00535214	6.8578	5	19	4	4	0.76472	0.81387	-0.089445	19.268	3
	551	Tb927.10.5010	Tb927.10.5010	EF-G1	Mitochondrial elongation factor G, putative	83.982	24.1	0	94.547	1	1	0.976847	-0.0101733	0.985032	0.00654969		17	10	10	0.835771	0.980392	-0.00860015	8.6684	11	23.2	13	13	0.85637	0.9688	-0.0137659	10.035	17	18	11	11	0.90452	0.9814	-0.00815395	6.6613	12
	728	Tb927.11.11470	Tb927.11.11470		hypothetical protein, conserved	32.022	24.1	0	23.011	1	1	1.02987	0.0127809	0.0835205	1.07821		21.3	5	5	0.885191	1.05219	0.0220938	12.19	6	13.5	3	3	0.91585	1.0344	0.0146885	2.3436	3	20.2	5	5	0.92546	1.0036	0.00156065	19.673	5
	1358	Tb927.4.1300	Tb927.4.1300		amidinotransferase, putative	42.015	24.1	0	31.31	1		1.01917	0.00824456	0.13156	0.880876		24.1	6	6	0.87727	1.04456	0.0189338	20.74	7	15.8	4	4	0.88604	1.0059	0.00255481	15.373	5	24.1	6	6	0.91944	1.0075	0.00324505	9.2437	8
	889	Tb927.11.1690	Tb927.11.1690		hypothetical protein, conserved	20.428	24	0	56.92	1		0.973082	-0.0118505	0.604555	0.218564		10.4	1	1	0.985028	1.16112	0.0648756	NaN	1	13.7	1	1	0.77534	0.86287	-0.0640546	NaN	1	10.4	1	1	0.86077	0.91966	-0.0363727	NaN	1
	911	Tb927.11.2360	Tb927.11.2360	PheRS-beta	phenylalanyl-tRNA synthetase (beta subunit), putative	70.311	24	0	56.042	1	1	0.936161	-0.0286494	0.828916	0.0814897		15.9	8	8	0.847673	1.00194	0.000843449	14.485	8	14.7	6	6	0.86735	0.97188	-0.0123874	5.8897	6	19.2	11	11	0.75687	0.84255	-0.0744043	11.418	10
	1491	Tb927.5.1810;Tb927.5.1830	Tb927.5.1810;Tb927.5.1830	p67	lysosomal/endosomal membrane protein p67 (p67);lysosomal/endosomal membrane protein p67,lysosomal membrane glycoprotein	72.732	24	0	51.011	2		0.990581	-0.0041098	0.634632	0.197478		10.6	6	6	0.868508	1.03573	0.0152478	11.581	6	22	10	10	0.83962	0.95422	-0.0203515	12.663	12	16.7	8	8	0.914	0.9835	-0.00722564	4.7542	9
	169	Tb927.10.16150;Tb11.v5.0397	Tb927.10.16150;Tb11.v5.0397		ATP-dependent zinc metallopeptidase, putative;ATP-dependent zinc metallopeptidase, putative	62.779	23.9	0	83.937	2	1	1.01045	0.00451523	0.44208	0.354499		7.3	2	2	0.745712	0.896057	-0.0476642	10.977	3	16.8	7	7	0.9891	1.1091	0.0449707	4.5311	9	19.1	8	8	0.9531	1.0381	0.0162392	5.8127	8
	2000	Tb927.8.4930	Tb927.8.4930		hypothetical protein, conserved	33.895	23.9	0	20.696	1	1	0.982217	-0.00779272	0.581737	0.235273		9.8	1	1	0.935279	1.10893	0.0449041	NaN	1	9.8	1	1	0.75353	0.85255	-0.0692801	NaN	1	23.9	5	5	0.93928	1.0023	0.00099773	3.6967	6
	2184	Tb927.9.14240;Tb11.v5.0621	Tb927.9.14240;Tb11.v5.0621	Nup82	Nucleoporin (Nup82);hypothetical protein, conserved	82.445	23.9	0	68.387	2		0.998833	-0.000507258	0.524989	0.27985		16.4	9	9	0.81314	0.976658	-0.0102575	4.9747	9	11.3	6	6	0.87377	0.98916	-0.00473345	10.617	7	23.9	15	15	0.95244	1.0315	0.0134692	18.364	16
	557	Tb927.10.5120	Tb927.10.5120	KREPA6	KREPA6 (KREPA6)	18.09	23.8	0	16.461	1	1	0.924175	-0.034246	0.638856	0.194597		10.4	2	2	0.538039	0.631632	-0.199536	60.067	2	15.2	2	2	1.0445	1.1805	0.072066	5.8007	2	17.1	3	3	0.98835	1.0586	0.0247319	24.518	3
	231	Tb927.1.1000	Tb927.1.1000		developmentally regulated phosphoprotein	47.206	23.8	0	79.335	1	1	1.02862	0.012257	0.151963	0.818263		20.7	8	8	0.849329	1.00329	0.00142692	10.349	8	16.2	5	5	0.89967	1.0124	0.00535214	17.274	7	21.7	7	7	0.99255	1.0715	0.0299922	6.8719	9
	1387	Tb927.4.2360	Tb927.4.2360		hypothetical protein, conserved	35.65	23.8	0	111.89	1	1	0.995171	-0.00210247	0.56482	0.24809		21.6	6	6	0.790952	0.947149	-0.0235816	9.2099	7	15.6	4	4	0.91233	1.0354	0.0151082	14.823	6	18.8	6	6	0.93131	1.005	0.00216606	25.759	7
	1865	Tb927.7.6660	Tb927.7.6660		chaperone protein DNAj, putative	29.887	23.7	0	69.816	1	1	1.02224	0.00955087	0.414425	0.382554		19.8	3	3	0.760109	0.906865	-0.0424574	31.593	4	13.2	2	2	1.0878	1.2179	0.0856116	21.173	2	23.7	4	4	0.8922	0.96716	-0.0145017	7.0399	7
	1118	Tb927.11.9530	Tb927.11.9530		14-3-3-I protein	30.31	23.7	0	12.677	1		0.955185	-0.0199123	0.778408	0.108793		9.2	2	2	0.757691	0.905469	-0.0431264	2.8289	2	8	2	2	0.92958	1.052	0.0220157	2.1884	2	18.7	4	4	0.84358	0.9149	-0.0386264	12.556	4
	2247	Tb927.9.4930	Tb927.9.4930		hypothetical protein, conserved	45.747	23.7	0	54.099	1		0.958396	-0.0184549	0.926638	0.0330898		18.3	5	5	0.798722	0.950932	-0.0218506	12.65	6	10	3	3	0.82318	0.93271	-0.0302534	12.842	4	23.7	6	6	0.92256	0.99252	-0.00326073	12.749	8
	2089	Tb927.8.8150	Tb927.8.8150		hypothetical protein, conserved	19.746	23.6	0	14.192	1		0.919723	-0.036343	0.696006	0.157387		23.6	3	2	0.940291	1.11644	0.0478373	7.9107	2	23.6	3	2	0.62549	0.70268	-0.153242	32.635	2	23.6	3	2	0.92257	0.99169	-0.00362407	12.474	2
	234	Tb927.1.120;Tb927.4.220;Tb11.v5.0495	Tb927.1.120		retrotransposon hot spot protein 4 (RHS4), putative	98.024	23.6	0	113.36	3		0.986958	-0.00570154	0.599546	0.222177		15.5	12	2	0.761151	0.916506	-0.0378645	12.48	3	11.3	8	1	0.95392	1.0728	0.0305188	NaN	1	20.9	15	4	0.90084	0.97778	-0.00975885	5.7162	4
	1582	Tb927.6.1410	Tb927.6.1410		hypothetical protein, conserved	27.154	23.6	0	13.344	1	1	0.990673	-0.00406979	0.590193	0.229006		20.1	4	4	0.782656	0.938967	-0.0273496	21.924	4	11.4	2	2	0.93849	1.0612	0.0257972	7.4862	3	19.2	4	4	0.9117	0.97576	-0.010657	14.039	4
	116	Tb927.6.4980;Tb11.0390;Tb11.0290	Tb927.6.4980;Tb11.0390;Tb11.0290	RPS14;RPS14;RPS14	40S ribosomal protein S14 (RPS14);40S ribosomal protein S14, putative,chrXI additional, unordered contigs (RPS14);40S ribosomal protein S14, putative,chrXI additional, unordered contigs (RPS14)	15.513	23.6	0	12.699	3		0.95394	-0.020479				0	0	0	NaN	NaN		NaN	0	0	0	0	NaN	NaN		NaN	0	23.6	3	3	0.89095	0.95394	-0.0204789	4.0687	3
	1698	Tb927.6.590	Tb927.6.590		hypothetical protein, conserved	12.277	23.5	0	8.8598	1	1	0.964651	-0.0156296	0.558392	0.253061		15.3	1	1	0.530673	0.632831	-0.198712	92.447	2	15.3	1	1	1.1352	1.2966	0.112806	15.951	2	8.2	1	1	1.0094	1.094	0.0390173	NaN	1
	385	Tb927.10.13800	Tb927.10.13800		hypothetical protein, conserved	34.401	23.5	0	10.098	1		1.02795	0.0119703	0.321474	0.492855		9.9	1	1	0.78964	0.939144	-0.027268	NaN	1	13.9	2	2	0.99126	1.1204	0.0493731	32.96	2	19.5	3	3	0.93064	1.0323	0.0138059	1.0368	2
	268	Tb927.1.4420	Tb927.1.4420		ABC transporter, putative	104.68	23.5	0	102.31	1		0.99688	-0.00135693	0.710802	0.148251		18.9	13	13	0.841893	1.00435	0.00188465	14.356	12	13	8	8	0.88149	0.99824	-0.000765032	11.113	9	20	14	14	0.91977	0.98812	-0.00519031	25.952	13
	1655	Tb927.6.4080	Tb927.6.4080		hypothetical protein, conserved	24.735	23.4	0	17.47	1	1	0.950972	-0.0218324	0.957179	0.019007		23.4	4	4	0.807037	0.963298	-0.0162392	17.802	4	18.5	3	3	0.81589	0.92165	-0.035434	41.459	3	16.6	3	3	0.89323	0.96867	-0.0138242	25.571	3
	808	Tb927.11.14170	Tb927.11.14170		hypothetical protein, conserved	67.163	23.3	0	42.948	1		0.984178	-0.00692632	0.864322	0.0633242		17.2	8	8	0.843526	1.00522	0.00225982	9.1048	8	18.1	9	9	0.86214	0.97262	-0.0120568	6.5755	9	19.1	10	10	0.90195	0.97503	-0.010982	7.3555	9
	1227	Tb927.3.1710	Tb927.3.1710		hypothetical protein, conserved	43.986	23.3	0	15.924	1	1	0.982112	-0.0078391	0.671355	0.173048		17.5	4	4	0.886918	1.05306	0.0224548	30.529	4	11.6	2	2	0.83812	0.9439	-0.025074	29.159	2	11.6	5	5	0.87953	0.95302	-0.020898	56.935	5
	387	Tb927.10.13860	Tb927.10.13860		GPI-anchor transamidase subunit 8 (GPI8)	36.798	23.2	0	23.627	1		1.13539	0.0551461	0.264161	0.578131		13.2	3	3	0.918527	1.10172	0.042072	7.4476	3	16.9	3	3	1.3639	1.5397	0.187436	21.072	3	11.6	2	2	0.7882	0.86284	-0.0640697	27.736	2
	1377	Tb927.4.2070;Tb11.v5.0410;Tb11.v5.0881	Tb927.4.2070;Tb11.v5.0410		antigenic protein, putative;antigenic protein, conserved	511.32	23.2	0	46.539	3		1.03602	0.0153683	0.3784	0.422048		11.1	1	1	0.975991	1.13141	0.0536215	NaN	1	0	0	0	NaN	NaN		NaN	0	23.2	5	5	0.87546	0.94867	-0.0228848	19.653	4
	478	Tb927.10.2550	Tb927.10.2550		malate dehydrogenase-related	38.998	23.2	0	32.051	1	1	0.961354	-0.0171168	0.735622	0.133346		23.2	5	5	0.737409	0.876194	-0.0573998	57.999	5	17.6	4	4	0.8553	0.9662	-0.014933	4.8518	4	9.5	2	2	0.96688	1.0495	0.0209824	4.2625	2
	1920	Tb927.8.1850	Tb927.8.1850		mitochondrial calcium uptake 1	45.709	23.2	0	75.93	1		1.02001	0.00860503	0.29379	0.531962		18.5	5	5	0.830427	0.990786	-0.00402027	77.87	5	13.4	4	4	0.97018	1.0851	0.0354698	16.032	4	20.7	6	6	0.91119	0.98711	-0.00563445	3.8936	6
	2031	Tb927.8.6030;Tb927.9.14000	Tb927.8.6030;Tb927.9.14000		60S ribosomal protein L12, putative;60S ribosomal protein L12, putative	17.564	23.2	0	18.2	2		1.01274	0.00549638	0.380124	0.420075		23.2	2	2	0.837802	0.987752	-0.00535217	3.2055	2	14	1	1	0.96507	1.0877	0.0365091	7.7258	3	23.2	2	2	0.90155	0.96679	-0.0146679	4.8491	3
	600	Tb927.10.7060	Tb927.10.7060		nucleoporin interacting component (NUP93), putative	96.511	23.2	0	72.672	1		1.02084	0.00895936	0.377804	0.422734		12.2	8	8	0.964692	1.13418	0.0546839	31.035	10	18.5	10	10	0.89132	1.0097	0.00419236	9.4751	9	12.5	9	9	0.86161	0.92897	-0.0319983	42.88	11
	1111	Tb927.11.9350	Tb927.11.9350		phosphonopyruvate decarboxylase-like protein, putative	42.313	23.2	0	36.978	1		1.02765	0.0118448	0.076488	1.11641		21.4	7	7	0.879044	1.0521	0.022057	9.8389	8	10.1	3	3	0.90086	1.0207	0.00889811	9.7333	3	16.9	5	5	0.93476	1.0106	0.00457929	14.621	5
	2071	Tb927.8.7170	Tb927.8.7170		inositol polyphosphate 1-phosphatase, putative	42.081	23.1	0	51.44	1		1.01589	0.00684831	0.367684	0.434525		17.7	5	5	0.925755	1.10072	0.0416749	10.263	7	17.7	5	5	0.87524	0.98716	-0.00561245	7.3599	7	21	6	6	0.89167	0.9649	-0.0155177	12.538	8
	2043	Tb927.8.6300	Tb927.8.6300		hypothetical protein, conserved	53.276	23.1	0	74.919	1		0.993826	-0.00268986	0.593305	0.226722		15.1	6	6	0.864977	1.03452	0.0147397	12.807	6	13	5	5	0.88388	0.99343	-0.00286273	15.284	6	23.1	10	10	0.88061	0.95511	-0.0199466	12.328	9
	1467	Tb927.5.1030	Tb927.5.1030	Isa2	hypothetical protein, conserved	19.07	23.1	0	14.049	1	1	0.926999	-0.0329206	0.806424	0.0934364		8.7	1	1	0.829875	0.977231	-0.010003	NaN	1	0	0	0	NaN	NaN		NaN	0	23.1	3	3	0.82913	0.87935	-0.0558382	18.551	3
	1953	Tb927.8.2850	Tb927.8.2850		Poly(A)-specific ribonuclease PARN-1	65.146	23	0	62.801	1	1	1.0571	0.0241167	0.323726	0.489822		7.7	3	3	0.721449	0.868206	-0.0613771	9.523	4	12.6	5	5	0.97167	1.0992	0.0410767	12.686	5	18.1	6	6	1.1516	1.2378	0.0926505	25.596	6
	2173	Tb927.9.13990	Tb927.9.13990	DRBD2	RNA-binding protein, putative (DRBD2)	34.618	23	0	27.29	1		0.949841	-0.0223491	0.861383	0.0648038		7.9	2	2	0.770713	0.912492	-0.0397709	16.521	2	20.3	4	4	0.89823	1.018	0.00774778	10.292	5	15.7	4	4	0.85152	0.92252	-0.0350242	9.1869	6
	1017	Tb927.11.5840	Tb927.11.5840		Protein translation factor SUI1 homolog, putative	12.738	22.9	0	4.7994	1		1.04116	0.0175183	0.472777	0.325343		13.8	1	1	1.40266	1.66669	0.221856	NaN	1	0	0	0	NaN	NaN		NaN	0	9.2	1	1	0.60917	0.6504	-0.186819	NaN	1
	1180	Tb927.2.4380	Tb927.2.4380		hypothetical protein, conserved	45.971	22.9	0	37.036	1	1	1.05495	0.0232325	0.263518	0.57919		11.7	4	4	0.771426	0.917347	-0.0374664	1.4735	3	11.2	3	3	0.97521	1.1137	0.0467682	28.812	3	13.1	5	5	1.06	1.1492	0.0603956	22.26	5
	1228	Tb927.3.1730	Tb927.3.1730		hypothetical protein, conserved	25.482	22.9	0	14.882	1	1	0.94998	-0.0222854	0.686961	0.163068		6.1	1	1	0.739371	0.879507	-0.0557605	8.4711	2	0	0	0	NaN	NaN		NaN	0	22.9	4	4	0.93729	1.0261	0.0111897	13.003	6
	381	Tb927.10.13630	Tb927.10.13630		glucosidase, putative	91.488	22.9	0	123.51	1		1.00795	0.00343791	0.340409	0.467999		15.7	9	9	0.848896	1.00076	0.000330372	18.043	10	20.4	12	12	0.87253	0.98352	-0.0072168	10.676	12	20.4	12	12	0.96542	1.0404	0.0172003	13.16	12
	1871	Tb927.7.6930	Tb927.7.6930		ATPase, putative	55.82	22.9	0	32.729	1	1	0.999418	-0.000252872	0.506033	0.295821		6.3	3	3	0.885426	1.06373	0.0268306	10.346	3	13.9	6	6	0.83713	0.94576	-0.0242191	8.5891	7	15.5	7	7	0.91579	0.99227	-0.00337014	37.013	7
	1800	Tb927.7.3960	Tb927.7.3960		50S ribosomal protein L16, putative	19.13	22.8	0	11.374	1	1	1.16975	0.0680925	0.212822	0.671984		22.8	2	2	0.827062	0.985707	-0.00625207	6.4127	2	16.8	1	1	1.4154	1.6039	0.205177	NaN	1	6	1	1	0.94319	1.0124	0.00535214	NaN	1
	931	Tb927.11.2910	Tb927.11.2910	iPGAM	phosphoglycerate mutase, putative (iPGAM)	43.738	22.7	0	25.591	1	1	1.00142	0.000617114	0.491884	0.308138		14.4	6	6	0.75683	0.90009	-0.0457141	12.187	7	16.4	5	5	0.88508	1.0004	0.000173683	10.064	5	10.7	5	5	1.0353	1.1153	0.0473917	18.93	5
	211	Tb11.v5.0713;Tb927.4.190	Tb11.v5.0713		retrotransposon hot spot (RHS) protein, putative	78.342	22.7	0	45.644	2		0.970774	-0.0128819	0.673766	0.171491		17	11	3	0.854409	1.02352	0.0100963	3.7948	3	13.1	7	2	0.77179	0.86696	-0.0620009	24.078	3	20.6	13	3	0.95648	1.031	0.0132587	6.1245	2
	657	Tb927.10.9150	Tb927.10.9150		hypothetical protein, conserved	33.243	22.7	0	34.167	1		0.98923	-0.00470258	0.58994	0.229192		17	2	2	0.866101	1.02839	0.0121595	9.5352	2	22.7	3	3	0.80993	0.90983	-0.0410397	15.917	5	13.7	2	2	0.95184	1.0346	0.0147725	0.69594	2
	1635	Tb927.6.3420	Tb927.6.3420		hypothetical protein, conserved	39.505	22.6	0	21.554	1	1	1.06825	0.028673	0.26115	0.58311		20.1	7	7	0.753636	0.902446	-0.044579	13.393	5	7.7	2	2	1.0546	1.1951	0.0774042	3.425	2	17.2	6	6	1.0425	1.1303	0.0531937	4.1252	5
	2113	Tb927.9.10580	Tb927.9.10580		3-demethylubiquinone-9 3-methyltransferase, putative	31.206	22.6	0	12.952	1	1	1.09799	0.0405996	0.115772	0.936396		14.6	4	4	1.01262	1.20837	0.0822007	10.515	5	7.6	2	2	0.981	1.097	0.0402066	10.627	2	11.8	3	3	0.92147	0.9986	-0.000608438	16.504	2
	612	Tb927.10.7520	Tb927.10.7520	FPGS	folylpolyglutamate synthase, putative (FPGS)	54.676	22.6	0	26.009	1		0.957974	-0.0186462	0.988646	0.00495939		13.4	5	5	0.790889	0.945537	-0.0243215	12.693	6	16.2	4	4	0.85158	0.96559	-0.0152072	17.363	6	12.6	5	5	0.89322	0.96292	-0.0164098	6.6759	6
	1812	Tb927.7.4270	Tb927.7.4270		hypothetical protein, conserved	25.241	22.5	0	18.892	1		1.0079	0.00341684	0.453352	0.343565		4.1	1	1	0.767813	0.895255	-0.0480532	NaN	1	5	1	1	0.94414	1.0627	0.0264107	NaN	1	17.6	3	3	1.001	1.0762	0.031893	16.304	3
	1317	Tb927.3.4920	Tb927.3.4920		LETM1 and EF-hand domain-containing protein 1, putative	42.737	22.5	0	31.851	1	1	0.90857	-0.0416417	0.80051	0.0966331		16.4	4	4	0.767754	0.912326	-0.0398501	16.247	5	20.1	5	5	0.94466	1.0599	0.0252649	11.69	4	18.8	5	5	0.69524	0.77564	-0.11034	90.05	5
	1446	Tb927.4.4910	Tb927.4.4910		3,2-trans-enoyl-CoA isomerase, mitochondrial precursor, putative	45.333	22.5	0	40.364	1	1	1.00722	0.00312469	0.418346	0.378464		8.5	2	2	0.874661	1.04182	0.0177923	21.462	4	18	5	4	0.83828	0.94727	-0.0235262	27.074	7	22.5	7	5	0.9559	1.0354	0.0151082	14.761	6
	2287	Tb927.9.7190	Tb927.9.7190		oxidoreductase, putative	49.92	22.5	0	49.745	1	1	0.985792	-0.00621491	0.895532	0.0479188		10.8	4	4	0.814797	0.970685	-0.0129215	16.199	4	18.2	5	5	0.87762	0.99125	-0.0038168	5.4096	6	10.6	4	4	0.92944	0.99562	-0.00190639	17.012	4
	802	Tb927.11.14000;Tb927.11.14020	Tb927.11.14000;Tb927.11.14020	NRBD1;NRBD2	NRBD1 (NRBD1);RNA-binding protein (NRBD2)	28.776	22.5	0	13.073	2		0.906498	-0.0426333	0.953772	0.0205554		17.9	4	4	0.815062	0.965997	-0.0150243	15.224	4	17.9	3	3	0.763	0.87113	-0.059917	24.48	3	17.9	3	3	0.81605	0.8852	-0.0529586	13.931	4
	973	Tb927.11.4460	Tb927.11.4460	ALBA1	ALBA-Domain Protein (ALBA1)	14.038	22.4	0	5.7189	1		1.10572	0.0436452	0.139517	0.855373		22.4	2	2	0.904814	1.06292	0.0265026	16.106	2	22.4	3	3	0.88589	1.007	0.00302947	9.7332	2	22.4	2	2	1.1688	1.263	0.101403	46.735	2
	841	Tb927.11.15420	Tb927.11.15420		hypothetical protein, conserved	23.057	22.4	0	13.26	1		0.862869	-0.0640549	0.707897	0.15003		14.1	2	2	0.458758	0.547136	-0.261905	102.3	2	6.3	1	1	0.97962	1.107	0.0441476	9.3201	2	22.4	3	3	0.96213	1.0607	0.0255926	113.73	3
	469	Tb927.10.2300	Tb927.10.2300		hypothetical protein, conserved	21.425	22.4	0	26	1	1	0.859628	-0.0656893	0.772728	0.111973		14.6	2	2	0.637471	0.754034	-0.122609	12.745	2	0	0	0	NaN	NaN		NaN	0	15.6	2	2	0.91497	0.98001	-0.00876949	24.181	2
	1966	Tb927.8.3300	Tb927.8.3300		hypothetical protein, conserved	77.891	22.4	0	78.081	1	1	0.994181	-0.00253443	0.583181	0.234197		18.4	11	11	0.820143	0.97972	-0.00889811	16.124	11	12.3	6	6	0.85787	0.96182	-0.0169062	5.4404	6	21	12	12	0.96425	1.0428	0.018201	13.922	13
	817	Tb927.11.14520	Tb927.11.14520		Polypeptide deformylase 1	29.64	22.3	0	31.975	1	1	1.02346	0.0100705	0.315827	0.500551		19.2	3	3	0.803407	0.953743	-0.0205684	9.5255	3	22.3	4	4	0.9729	1.1007	0.041669	8.5936	4	15	2	2	0.95756	1.0212	0.00911081	5.7448	3
	1539	Tb927.5.3800	Tb927.5.3800		glutamine hydrolysing (not ammonia-dependent) carbomoyl phosphate synthase, putative	204.09	22.3	0	216.02	1		1.01627	0.00700843	0.284379	0.546103		19.7	24	24	0.818867	0.969932	-0.0132587	14.131	28	14.8	19	19	0.92816	1.0494	0.0209411	21.364	21	17.6	24	24	0.95735	1.0312	0.0133429	12.596	31
	1606	Tb927.6.2190	Tb927.6.2190		hypothetical protein, conserved	31.531	22.3	0	10.054	1	1	0.929682	-0.0316655	0.755534	0.121746		3.5	1	1	0.86103	1.02352	0.0100963	NaN	1	9.4	2	2	0.6913	0.78194	-0.106827	44.708	2	9.4	2	2	0.92889	1.004	0.00173371	31.682	3
	1441	Tb927.4.4600	Tb927.4.4600		hypothetical protein, conserved	31.248	22.3	0	21.919	1	1	0.903634	-0.0440075	0.799788	0.0970252		18.1	3	3	0.843241	1.01273	0.00549368	23.392	3	19.2	3	3	0.66143	0.74725	-0.126534	10.648	3	13.1	3	3	0.89926	0.97503	-0.010982	96.541	3
	412	Tb927.10.14740;Tb927.10.14620;Tb11.v5.1063	Tb927.10.14740;Tb927.10.14620;Tb11.v5.1063		hypothetical protein, conserved;hypothetical protein, conserved;hypothetical protein, conserved	44.177	22.3	0	33.205	3		1.02103	0.00903899	0.343231	0.464414		13	3	3	0.885583	1.04803	0.0203741	13.687	3	17.4	5	5	0.93222	1.085	0.0354297	45.265	5	17.9	5	5	0.8553	0.93608	-0.028687	23.168	5
	1586	Tb927.6.1570	Tb927.6.1570		2-hydroxy-3-oxopropionate reductase, putative	31.753	22.3	0	12.628	1	1	0.992046	-0.00346822	0.71852	0.143561		14	3	3	0.844809	1.00287	0.00124377	3.0115	3	16.7	3	3	0.86279	0.96927	-0.0135552	13.387	4	17.3	3	3	0.92666	1.0044	0.0019067	13.808	3
	2042	Tb927.8.630	Tb927.8.630		lipoate-protein ligase, putative,lipoyl ligase, putative,lipoyltransferase, putative,lipoate biosynthesis protein, putative	57.052	22.3	0	110.06	1	1	0.935776	-0.0288283	0.874704	0.0581387		15.8	5	5	0.826037	0.97352	-0.011655	8.999	6	8	3	3	0.87095	0.97725	-0.00999432	7.351	3	22.3	8	8	0.80303	0.86132	-0.0648355	157.04	6
	300	Tb927.10.10610	Tb927.10.10610		protein tyrosine phosphatase, putative	25.449	22.3	0	31.121	1	1	1.02496	0.0107077	0.193054	0.71432		15.3	3	3	0.893895	1.06943	0.0291511	5.7479	4	22.3	4	4	0.90872	1.016	0.00689371	8.9377	5	15.3	3	3	0.92467	0.99101	-0.00392196	7.6416	4
	2023	Tb927.8.5760	Tb927.8.5760		hypothetical protein, conserved	53.809	22.2	0	44.646	1		1.06606	0.0277801	0.170437	0.768435		11.1	4	4	0.956297	1.14593	0.05916	59.234	4	10.9	4	4	0.84443	0.96465	-0.0156302	8.5027	4	16.1	6	6	1.01	1.096	0.0398106	40.127	6
	351	Tb927.10.1260	Tb927.10.1260	AspRS-2	aspartyl-tRNA synthetase, putative	60.842	22.2	0	37.879	1	1	0.985253	-0.00645214	0.628465	0.201719		10.5	5	5	0.78604	0.911826	-0.0400878	15.927	5	20.9	9	9	0.92515	1.0382	0.016281	9.3587	9	7.8	4	4	0.93189	1.0103	0.00445035	20.238	4
	683	Tb927.11.10080	Tb927.11.10080		hypothetical protein, conserved	21.564	22.2	0	11.879	1	1	0.788354	-0.103279	0.85271	0.0691986		22.2	2	2	0.906618	1.08706	0.0362547	21.214	2	10.1	1	1	0.65121	0.73508	-0.133665	NaN	1	10.1	1	1	0.56184	0.61316	-0.212426	NaN	1
	698	Tb927.11.10510	Tb927.11.10510		ubiquinone biosynthesis methyltransferase, putative	32.094	22.2	0	24.419	1	1	1.00716	0.00309751	0.283291	0.547767		8	2	2	0.846239	1.01124	0.00485209	21.157	2	22.2	5	5	0.87514	0.98737	-0.00552007	24.838	6	16.7	4	4	0.94571	1.0232	0.00996053	17.825	4
	970	Tb927.11.4370	Tb927.11.4370		hypothetical protein, conserved	24.411	22.2	0	19.057	1		0.991026	-0.00391494	0.652379	0.1855		9.3	1	1	0.848464	0.996115	-0.00169048	14.054	2	14.7	2	2	0.91413	1.0229	0.00983318	199.96	3	16.9	2	2	0.89105	0.95524	-0.0198875	15.334	2
	2288	Tb927.9.7200	Tb927.9.7200		hypothetical protein, conserved	33.696	22.1	0	9.2457	1		0.964228	-0.0158202	0.682638	0.16581		13.8	3	3	0.79968	0.959325	-0.0180344	18.288	4	6.2	1	1	0.95816	1.083	0.0346285	NaN	1	22.1	5	5	0.79483	0.86287	-0.0640546	15.646	5
	1615	Tb927.6.2490	Tb927.6.2490		hypothetical protein, conserved	28.031	22.1	0	10.03	1	1	0.992559	-0.00324354	0.546532	0.262384		13.8	3	3	0.856898	0.972384	-0.0121621	17.97	3	18.8	3	3	0.9674	1.1041	0.0430084	12.656	3	7.9	2	2	0.84208	0.9108	-0.040577	16.562	2
	286	Tb927.10.10120	Tb927.10.10120		hypothetical protein, conserved	63.236	22.1	0	34.131	1	1	1.01843	0.00793108	0.200748	0.697348		3.1	1	1	0.858959	1.01839	0.00791498	6.2318	2	11.7	4	4	0.87034	0.98841	-0.00506287	19.763	5	18.6	7	7	0.96766	1.0494	0.0209411	16.506	9
	1547	Tb927.5.4020	Tb927.5.4020		hypothetical protein	29.347	22.1	0	78.257	1		1.05086	0.0215447	0.0588142	1.23052		22.1	4	4	0.892777	1.07208	0.0302256	13.345	4	17.3	3	3	0.94567	1.0693	0.0290996	2.7372	7	17.6	3	3	0.96638	1.0123	0.00530924	15.509	5
	1350	Tb927.3.940	Tb927.3.940		hypothetical protein, conserved	18.107	22.1	0	16.035	1	1	1.02078	0.00893098	0.286427	0.542985		22.1	2	2	0.90703	1.08169	0.0341024	6.5932	2	22.1	2	2	0.85522	0.97396	-0.0114589	0.56786	2	22.1	2	2	0.92122	1.0096	0.00414934	2.7088	2
	840	Tb927.11.1540	Tb927.11.1540		isovaleryl-coA dehydrogenase, putative	44.799	22.1	0	25.099	1	1	0.988467	-0.00503791	0.715136	0.145612		16.1	6	6	0.848464	1.01914	0.00823342	5.8794	8	17	6	6	0.84713	0.96022	-0.0176293	23.938	6	20.2	7	7	0.91648	0.98692	-0.00571805	6.2616	10
	1618	Tb927.6.2550	Tb927.6.2550	TRRM2	RNA-binding protein, putative (TRRM2)	79.849	22.1	0	94.171	1		0.977294	-0.0099746	0.734597	0.133951		17.1	8	8	0.867905	1.0366	0.015612	14.998	9	15.7	8	8	0.83415	0.93561	-0.0289051	17.819	10	17.1	10	10	0.8933	0.96243	-0.0166308	13.619	12
	2081	Tb927.8.7700;Tb927.8.7680;Tb927.4.4020;Tb927.4.4010;Tb927.4.4000;Tb927.4.3990	Tb927.8.7700;Tb927.8.7680		amino acid transporter, putative;amino acid transporter, putative	51.74	22	0	58.2	6		0.98412	-0.00695182	0.673245	0.171827		10.9	2	2	0.783392	0.929973	-0.0315296	20.795	3	14	3	3	0.87526	0.99195	-0.00351022	16.909	4	18.9	5	4	0.94097	1.0332	0.0141844	2.8851	5
	988	Tb927.11.5040	Tb927.11.5040		leucine-rich repeat protein (LRRP), putative	48.562	22	0	46.399	1		0.998851	-0.000499096	0.527649	0.277655		17.3	5	5	0.808604	0.970497	-0.0130059	8.6976	5	17.3	5	5	0.89582	1.0084	0.00363284	25.786	5	19.5	6	6	0.93926	1.0183	0.00787574	21.054	5
	1746	Tb927.7.2250	Tb927.7.2250		carnitine O-palmitoyltransferase II, putative	75.17	22	0	24.819	1	1	0.90228	-0.0446586	0.930588	0.0312426		14.1	6	6	0.74744	0.887548	-0.0518083	7.2675	5	13.2	6	6	0.86575	0.97859	-0.00939923	13.845	7	6	2	2	0.78321	0.84573	-0.0727683	22.038	2
	786	Tb927.11.13610	Tb927.11.13610		hypothetical protein, conserved	15.688	21.9	0	6.5726	1		0.974621	-0.011164	0.533768	0.272647		11.7	1	1	1.0379	1.24073	0.0936759	NaN	1	21.9	2	2	0.67658	0.76559	-0.116004	15.023	2	0	0	0	NaN	NaN		NaN	0
	312	Tb927.10.11060	Tb927.10.11060		hypothetical protein, conserved	8.8635	21.9	0	4.219	1	1	1.04311	0.0183313	0.266686	0.574		9.6	1	1	0.968617	1.16437	0.0660929	NaN	1	12.3	1	1	0.88985	1.0103	0.00445035	NaN	1	9.6	1	1	0.88988	0.96483	-0.0155492	NaN	1
	618	Tb927.10.7610	Tb927.10.7610		hypothetical protein, conserved	165.1	21.9	0	113.48	1	1	0.962809	-0.0164597	0.976614	0.0102769		17	17	17	0.793525	0.949037	-0.0227169	11.603	17	15.9	14	14	0.86169	0.96223	-0.0167211	13.634	14	17.2	17	17	0.90144	0.97737	-0.009941	12.548	17
	1902	Tb927.8.1060	Tb927.8.1060		malonyl-CoA decarboxylase, mitochondrial precursor, putative	82.379	21.9	0	44.635	1	1	0.987691	-0.00537885	0.785029	0.105115		13.2	7	7	0.844452	1.00586	0.00253926	12.333	8	8.2	6	6	0.8784	0.99364	-0.00277093	14.58	7	17.7	11	11	0.89154	0.96404	-0.0159049	19.698	12
	266	Tb927.1.4230	Tb927.1.4230		hypothetical protein, conserved	49.86	21.8	0	47.162	1		0.938253	-0.02768	0.588098	0.230551		9.9	3	3	0.489596	0.577601	-0.238372	28.824	4	12.2	3	3	0.94363	1.0639	0.0269008	22.662	3	10.8	4	4	1.2528	1.3441	0.128432	26.313	4
	846	Tb927.11.15550	Tb927.11.15550	B5R	NADH-cytochrome b5 reductase, putative (B5R)	33.885	21.8	0	25.829	1	1	1.06924	0.0290754	0.0610369	1.21441		9.1	2	2	0.900414	1.04898	0.020766	7.8714	3	18.2	4	4	0.9163	1.0356	0.015192	6.1895	5	15.3	4	4	1.045	1.1253	0.0512683	10.427	5
	1199	Tb927.2.5240	Tb927.2.5240	TbPRP19	PRP19-like protein, putative (TbPRP19)	54.268	21.8	0	82.315	1		1.01092	0.00471659	0.397064	0.40114		19.8	7	7	0.803148	0.953016	-0.0208997	7.8723	8	14.9	4	4	0.97693	1.0807	0.0337052	8.2306	4	18.5	6	6	0.92694	1.0031	0.00134423	5.322	7
	418	Tb927.10.14930	Tb927.10.14930	ZC3H39	zinc finger protein family member, putative (ZC3H39)	31.519	21.8	0	144.35	1		0.962693	-0.0165122	0.953036	0.0208908		12.6	2	2	0.780884	0.944465	-0.0248139	NaN	1	12.6	2	2	0.85283	0.95833	-0.0184849	2.3502	2	21.8	5	5	0.90919	0.98574	-0.00623762	32.451	6
	827	Tb927.11.14940	Tb927.11.14940		hypothetical protein, conserved	60.446	21.7	0	25.408	1		1.07538	0.0315609	0.119544	0.922474		15	5	5	0.85419	0.995421	-0.0019932	6.2429	5	10.2	4	4	1.0391	1.1585	0.063896	13.822	4	7.8	3	3	0.99114	1.0784	0.0327799	21.213	3
	1679	Tb927.6.4560	Tb927.6.4560		hypothetical protein, conserved	47.192	21.6	0	22.826	1	1	1.30893	0.116917	0.12524	0.902256		10.3	3	3	0.995322	1.18296	0.0729686	8.204	3	7.9	2	2	1.6028	1.8176	0.259498	92.841	2	17	6	6	0.96632	1.043	0.0182843	31.569	7
	2176	Tb927.9.14070	Tb927.9.14070		short-chain dehydrogenase, putative	51.103	21.6	0	43.407	1		0.955465	-0.0197852	0.621074	0.206857		12.1	4	4	0.636375	0.74096	-0.130205	16.485	3	14.9	4	4	0.93444	1.0438	0.0186173	19.596	5	14.5	5	5	1.0426	1.1278	0.0522321	21.511	5
	2250	Tb927.9.5100	Tb927.9.5100	PDEB2	cAMP-specific phosphodiesterase (PDEB2)	103.22	21.6	0	46.974	1		1.00917	0.00396358	0.389801	0.409157		18.4	13	3	0.805867	0.961076	-0.0172421	13.463	5	19.5	13	3	0.88955	1.0079	0.00341745	8.8065	6	17.5	14	4	0.98193	1.061	0.0257154	17.065	5
	995	Tb927.11.5180	Tb927.11.5180		hypothetical protein, conserved	27.635	21.6	0	23.34	1		1.00368	0.0015942	0.457537	0.339574		11.6	3	3	0.826788	0.974374	-0.0112743	1.2785	4	9.2	2	2	0.85747	0.97278	-0.0119854	2.5946	2	12.4	3	3	0.9787	1.0667	0.0280423	2.5276	2
	555	Tb927.10.510;Tb11.v5.0374	Tb927.10.510;Tb11.v5.0374		hypothetical protein, conserved;hypothetical protein, conserved	37.06	21.6	0	26.002	2	1	0.940453	-0.0266627	0.961947	0.0168488		4.5	1	1	0.759705	0.908018	-0.0419056	NaN	1	15	3	3	0.85733	0.96361	-0.0160987	16.722	3	14.7	4	4	0.87513	0.95064	-0.0219839	21.084	4
	677	Tb927.10.9960	Tb927.10.9960		hypothetical protein, conserved	50.168	21.6	0	39.493	1	1	0.976266	-0.0104317	0.96342	0.0161844		19	7	7	0.802955	0.962927	-0.0164065	13.423	7	19.4	7	7	0.87215	0.98275	-0.00755695	6.5385	7	19.8	7	7	0.90367	0.98326	-0.00733163	6.8372	9
	2308	Tb927.9.8290	Tb927.9.8290		hypothetical protein, conserved	25.114	21.6	0	8.3314	1	1	0.847426	-0.0718981	0.909553	0.0411721		10.6	2	2	0.808734	0.967305	-0.0144365	8.4918	2	6	1	1	0.76139	0.86257	-0.0642057	4.6591	3	17	2	2	0.67867	0.72937	-0.137052	28.557	2
	1347	Tb927.3.860	Tb927.3.860	ACP	acyl carrier protein,acyl carrier protein, mitochondrial precursor, putative (ACP)	16.531	21.6	0	58.489	1	1	1.01152	0.00497308	0.411846	0.385265		21.6	2	2	0.925069	1.10397	0.0429581	2.5426	3	21.6	2	2	0.87193	0.98763	-0.00540573	6.0944	6	21.6	3	3	0.88598	0.94922	-0.0226331	5.3668	5
	1654	Tb927.6.4070	Tb927.6.4070		hypothetical protein, conserved	29.319	21.5	0	51.364	1	1	1.07407	0.031031	0.0635031	1.19721		16.5	3	3	0.916506	1.09055	0.0376448	21.265	4	16.5	3	3	0.99793	1.1173	0.0481698	21.324	3	18	3	3	0.92207	1.0169	0.00727825	16.157	4
	1634	Tb927.6.3360	Tb927.6.3360		hypothetical protein, conserved	18.308	21.5	0	7.5738	1	1	0.962921	-0.0164094	0.848657	0.0712678		11	1	1	0.835981	0.981836	-0.007961	NaN	1	0	0	0	NaN	NaN		NaN	0	10.4	1	1	0.86122	0.94437	-0.0248578	NaN	1
	1021	Tb927.11.5960;Tb927.11.5950	Tb927.11.5960;Tb927.11.5950		hypothetical protein, conserved;hypothetical protein, conserved	11.278	21.5	0	54.352	2		1.0574	0.0242393				0	0	0	NaN	NaN		NaN	0	0	0	0	NaN	NaN		NaN	0	21.5	2	2	0.98421	1.0574	0.0242393	1.2522	3
	2062	Tb927.8.6820	Tb927.8.6820		hypothetical protein, conserved	47.159	21.4	0	41.007	1	1	0.909966	-0.040975	0.80778	0.0927069		14.7	3	3	0.853971	1.02992	0.0128031	12.407	3	9.1	2	2	0.83833	0.9471	-0.0236042	13.095	3	12.1	3	3	0.72477	0.77246	-0.112124	29.969	3
	1462	Tb927.4.840	Tb927.4.840		hypothetical protein, conserved	45.618	21.4	0	31.361	1	1	0.935013	-0.0291825	0.974943	0.0110208		15.8	5	5	0.80186	0.953471	-0.0206927	16.326	5	12.4	4	4	0.8015	0.90655	-0.0426082	8.7529	4	18	6	6	0.87425	0.9457	-0.0242466	3.2398	6
	272	Tb927.1.5000	Tb927.1.5000		hypothetical protein, conserved	30.458	21.4	0	66.086	1		0.915444	-0.0383683	0.934416	0.0294597		20.7	4	4	0.79164	0.938527	-0.0275535	11.116	5	17	3	3	0.85818	0.95788	-0.0186889	7.4545	4	17.7	4	4	0.78174	0.85337	-0.0688626	23.958	5
	702	Tb927.11.10690	Tb927.11.10690		hypothetical protein, conserved	45.229	21.3	0	45.898	1		1.32296	0.121548	0.231574	0.63531		12.7	3	3	0.858811	1.01811	0.00779556	20.505	3	21.3	6	6	0.80308	0.92519	-0.0337691	12.554	5	18.4	4	4	2.258	2.4582	0.390617	91.131	3
	1993	Tb927.8.4660;Tb11.v5.0863	Tb927.8.4660		hypothetical protein, conserved	117.96	21.3	0	87.581	2		1.00178	0.000770657	0.487464	0.312057		19.3	18	18	0.796686	0.952381	-0.0211893	8.8743	21	15	13	13	0.84522	0.9534	-0.0207249	15.691	14	19.4	18	18	1.0211	1.1072	0.0442261	15.277	21
	237	Tb927.1.1580	Tb927.1.1580		cytochrome c oxidase assembly factor, putative,electron transport protein SCO1/2, putative	33.578	21.3	0	20.27	1	1	0.968112	-0.0140744	0.707576	0.150227		10.3	3	3	0.859919	1.03485	0.0148791	5.1063	3	10.6	3	3	0.77769	0.8774	-0.0568024	13.713	2	21.3	6	6	0.92242	0.99931	-0.000299767	19.199	5
	1999	Tb927.8.4920	Tb927.8.4920		hypothetical protein, conserved	58.293	21.3	0	110.27	1	1	1.0061	0.00264129	0.400166	0.397759		17.5	7	7	0.858738	1.01238	0.00534399	7.6768	7	17.7	6	6	0.92273	1.0399	0.0169916	7.4204	7	10.7	4	4	0.90356	0.96736	-0.0144119	10.606	4
	171	Tb927.10.15850;Tb11.v5.0427	Tb927.10.15850;Tb11.v5.0427	PEX12	peroxin 12 (PEX12);peroxisome assembly protein, putative	43.172	21.3	0	61.159	2		0.974681	-0.0111374	0.932667	0.0302735		21.3	7	7	0.82413	0.973047	-0.0118663	5.7795	8	11.1	4	4	0.88218	0.99335	-0.0028977	2.4005	4	21.3	7	7	0.88371	0.95797	-0.0186481	10.694	8
	2248	Tb927.9.5000	Tb927.9.5000		hypothetical protein, conserved	31.326	21.2	0	8.6959	1	1	1.05875	0.024792	0.177216	0.751498		16.8	3	3	0.819605	0.984446	-0.00680819	41.342	3	10.6	2	2	0.92522	1.0407	0.0173256	21.042	2	4.4	1	1	1.0691	1.1584	0.0638585	NaN	1
	309	Tb927.10.1100;Tb927.6.4690	Tb927.10.1100;Tb927.6.4690		60S ribosomal protein L9, putative;60S ribosomal protein L9, putative	21.857	21.2	0	5.1067	2		0.988458	-0.00504166	0.54871	0.260657		21.2	3	3	0.855652	1.0127	0.00548038	9.7557	3	7.4	1	1	0.99805	1.1275	0.0521166	NaN	1	15.9	2	2	0.78815	0.84582	-0.072722	12.64	2
	590	Tb927.10.6610	Tb927.10.6610		chaperone protein DNAj, putative	31.198	21.2	0	56.879	1		0.9969	-0.00134832	0.573144	0.241736		21.2	4	4	0.80952	0.97144	-0.0125842	30.178	4	21.2	4	4	0.88786	0.99722	-0.00120902	3.7782	4	21.2	4	4	0.94257	1.0227	0.00974826	4.2772	4
	1232	Tb927.3.1820	Tb927.3.1820	MRB1820	mitochondrial RNA binding complex 1 subunit (MRB1820)	25.432	21.2	0	47.529	1	1	0.988809	-0.00488747	0.563201	0.249337		21.2	3	3	0.944109	1.11939	0.0489834	3.8103	3	21.2	3	3	0.83318	0.94119	-0.0263227	32.833	3	13.5	2	2	0.85342	0.91765	-0.0373229	17.525	2
	1517	Tb927.5.3040	Tb927.5.3040		MIX protein	23.069	21.2	0	4.1297	1	1	0.958387	-0.0184592	0.848455	0.0713711		7.1	1	1	0.810373	0.979624	-0.00894063	NaN	1	14.1	2	2	0.83342	0.93761	-0.0279778	23.928	2	0	0	0	NaN	NaN		NaN	0
	1711	Tb927.7.1060	Tb927.7.1060		hypothetical protein, conserved	53.733	21.1	0	26.502	1		1.81231	0.258232	0.277788	0.556286		0	0	0	NaN	NaN		NaN	0	11.5	3	3	3.2798	3.6813	0.566001	79.312	3	11.9	4	4	0.82204	0.8922	-0.0495378	12.426	3
	1172	Tb927.2.4090	Tb927.2.4090		hypothetical protein, conserved	29.38	21.1	0	40.041	1		1.02421	0.0103887	0.371075	0.430538		21.1	3	3	0.758956	0.902527	-0.0445398	5.1493	4	21.1	3	3	0.97389	1.0991	0.0410372	9.9744	3	21.1	3	3	1.0071	1.0831	0.0346686	6.6959	4
	2174	Tb927.9.1400	Tb927.9.1400		Monooxygenase, putative	51.432	21.1	0	10.411	1	1	0.961026	-0.0172651	0.846075	0.0725912		0	0	0	NaN	NaN		NaN	0	18.2	4	4	0.83281	0.94117	-0.0263319	22.415	4	9.2	2	2	0.90369	0.9813	-0.0081982	14.084	2
	1899	Tb927.7.990	Tb927.7.990		chaperone protein DNAj, putative	86.6	21.1	0	52.185	1		1.01437	0.00619685	0.139441	0.855611		16.3	10	10	0.83612	1.0055	0.00238207	14.606	11	15.2	9	9	0.92073	1.0342	0.0146045	16.327	11	15	9	9	0.93476	1.0037	0.00160392	10.887	9
	192	Tb927.10.7100;Tb11.v5.0580	Tb927.10.7100;Tb11.v5.0580		delta-4 fatty acid desaturase;delta-6 fatty acid desaturase, putative	47.965	21.1	0	123.47	2		1.0264	0.0113187	0.308739	0.510408		21.1	6	6	0.945716	1.12177	0.049903	7.9303	5	18.1	5	5	0.86836	0.97697	-0.0101188	2.9014	8	10.2	3	3	0.90843	0.98667	-0.00582808	11.007	3
	1113	Tb927.11.9390	Tb927.11.9390		lipoate-protein ligase, putative,lipoyltransferase, putative	29.64	21.1	0	25.671	1	1	1.00842	0.00364332	0.30511	0.515543		18.5	3	3	0.868131	1.03627	0.0154725	4.5774	3	12.8	2	2	0.87472	0.9891	-0.0047598	2.2023	2	21.1	4	4	0.92281	1.0005	0.000217093	11.754	3
	1620	Tb927.6.2600	Tb927.6.2600		hypothetical protein, conserved	16.11	21	0	10.718	1		1.24605	0.0955358	0.162123	0.790154		11.2	1	1	0.847242	1.00971	0.00419795	NaN	1	21	2	2	0.96908	1.0991	0.0410372	17.376	4	11.2	2	2	1.5982	1.7433	0.241372	72.487	2
	1457	Tb927.4.720	Tb927.4.720		hypothetical protein, conserved	12.297	21	0	16.045	1	1	1.1176	0.0482865	0.0908079	1.04188		21	2	2	0.865351	1.00267	0.00115672	4.4284	2	21	1	1	1.0065	1.1593	0.0641958	NaN	1	21	2	2	1.1123	1.2009	0.0795068	9.4458	2
	1429	Tb927.4.4190	Tb927.4.4190		hypothetical protein, conserved	17.352	21	0	37.615	1		1.04594	0.019507	0.141718	0.848576		15.9	2	1	0.85778	1.02376	0.010199	NaN	1	5.7	1	0	NaN	NaN		NaN	0	21	3	2	0.9974	1.0686	0.0288152	12.326	3
	1802	Tb927.7.3980	Tb927.7.3980		immunodominant antigen, putative,tc40 antigen-like	97.32	21	0	86.606	1		1.05877	0.0248008	0.111665	0.952081		11.1	6	6	0.884564	1.05212	0.0220661	7.8635	6	11.8	6	6	0.89432	1.0038	0.00164719	9.8049	6	17.6	11	11	1.0398	1.1238	0.050689	8.2083	12
	1133	Tb927.11.9770	Tb927.11.9770		hypothetical protein, conserved	19.842	21	0	10.319	1		0.970402	-0.0130485	0.661081	0.179745		15.1	2	2	0.905879	1.06959	0.0292161	9.8907	3	7	1	1	0.76686	0.86377	-0.0636019	NaN	1	21	3	3	0.91255	0.9891	-0.0047598	2.018	4
	1600	Tb927.6.2080	Tb927.6.2080		hypothetical protein, conserved	45.886	21	0	8.0499	1	1	0.940775	-0.0265142	0.723548	0.140533		9.8	3	3	0.940999	1.11809	0.0484779	6.9313	3	14.9	4	4	0.76406	0.85956	-0.0657238	9.8345	4	12.1	4	4	0.80223	0.86637	-0.0622966	30.313	4
	611	Tb927.10.7500	Tb927.10.7500	NOP1	fibrillarin (NOP1)	31.643	21	0	9.2637	1		0.998564	-0.000623882	0.511101	0.291494		17.7	4	4	0.922679	1.08829	0.0367458	14.937	4	17	4	4	0.88135	0.9826	-0.00762324	18.029	3	13.7	3	3	0.87421	0.93112	-0.0309943	13.035	3
	999	Tb927.11.5300	Tb927.11.5300	Kif13-3	kinesin, putative,mitotic centromere-associated kinesin, putative (Kif13-3)	62.524	21	0	74.509	1		1.01216	0.0052506	0.385464	0.414017		17.1	8	8	0.924813	1.08575	0.035731	7.7175	10	14.8	7	7	0.87922	0.99329	-0.00292394	16.945	9	21	10	10	0.89363	0.96149	-0.0170552	44.73	10
	318	Tb927.10.11260	Tb927.10.11260		hypothetical protein, conserved	22.384	20.9	0	13.214	1	1	1.39833	0.145608	0.267831	0.572139		16.6	2	2	2.91724	3.44899	0.537692	111.15	2	9.1	1	1	0.82666	0.9324	-0.0303977	NaN	1	20.9	3	3	0.78066	0.85022	-0.0704687	12.176	3
	2102	Tb927.8.920	Tb927.8.920	PEX4	ubiquitin-conjugating enzyme E2, putative,ubiquitin-protein ligase, putative,ubiquitin carrier protein, putative	18.992	20.9	0	23.015	1		1.16431	0.0660674	0.202863	0.692796		20.9	3	3	0.820345	0.979144	-0.0091533	8.3364	3	20.9	3	3	0.91942	1.0367	0.0156531	11.15	3	14	2	2	1.4335	1.5549	0.191702	67.73	2
	1853	Tb927.7.6180	Tb927.7.6180		hypothetical protein, conserved	29.957	20.9	0	17.713	1		1.01803	0.00776254	0.442453	0.354133		11.9	2	2	0.69185	0.822165	-0.0850408	25.068	3	11.9	2	2	1.0492	1.1768	0.0707027	20.32	3	20.9	4	4	1.0092	1.0905	0.0376257	13.688	4
	537	Tb927.10.4280	Tb927.10.4280		hypothetical protein, conserved	24.055	20.9	0	16.175	1	1	1.02126	0.00913719	0.200855	0.697117		20.9	3	3	0.823995	0.985902	-0.00616643	10.48	5	20.9	3	3	0.90491	1.0228	0.00979072	3.3815	6	12.4	2	2	0.98265	1.0563	0.0237873	1.4536	4
	884	Tb927.11.16750	Tb927.11.16750		hypothetical protein, conserved	25.871	20.9	0	30.106	1	1	0.943382	-0.0253123	0.765879	0.11584		20.9	5	5	0.913159	1.07572	0.0316992	41.686	5	16.2	3	3	0.7832	0.88368	-0.053705	55.506	3	16.7	3	3	0.82781	0.88322	-0.0539311	7.4246	3
	148	Tb927.10.5340;Tb927.10.5330;Tb11.v5.1060;Tb11.v5.0243	Tb927.10.5340;Tb927.10.5330;Tb11.v5.1060;Tb11.v5.0243	RPS18	40S ribosomal protein S18, putative (RPS18);40S ribosomal protein S18, putative;40S ribosomal protein S18, putative;40S ribosomal protein S18, putative	17.51	20.9	0	50.567	4		0.971055	-0.0127562	0.733636	0.134519		20.9	4	4	0.872296	1.02904	0.0124323	14.73	4	20.3	3	3	0.87688	0.98764	-0.00540133	1.2515	3	20.3	3	3	0.82931	0.90095	-0.0452993	17.602	3
	667	Tb927.10.9650;Tb11.v5.0399	Tb927.10.9650;Tb11.v5.0399		hypothetical protein, conserved;hypothetical protein, conserved	152.97	20.8	0	132.23	2		1.02192	0.00941742	0.231155	0.636097		16.4	15	15	0.865127	1.02923	0.0125124	36.944	15	16.5	14	14	0.87546	0.9772	-0.0100165	13.927	16	15.3	15	15	0.98652	1.0611	0.0257563	11.883	15
	2192	Tb927.9.15150;Tb927.9.15110	Tb927.9.15150;Tb927.9.15110		unspecified product;unspecified product	34.636	20.8	0	12.037	2		1.0215	0.00923722	0.337069	0.472282		11	3	3	0.886603	1.05611	0.0237096	54.017	4	9.7	3	3	0.94674	1.0773	0.0323367	3.81	4	15.6	4	4	0.86698	0.93684	-0.0283346	5.4538	4
	2212	Tb927.9.2390	Tb927.9.2390		hypothetical protein, conserved	22.31	20.7	0	16.777	1		1.12819	0.052383	0.32778	0.484418		0	0	0	NaN	NaN		NaN	0	17.2	3	3	0.80466	0.923	-0.0347983	7.144	4	11.6	3	3	1.2601	1.379	0.139564	14.548	4
	1548	Tb927.5.4040	Tb927.5.4040		hypothetical protein, conserved	94.263	20.7	0	40.11	1	1	1.01188	0.00513034	0.471982	0.326074		11	7	7	0.626763	0.75188	-0.123852	21.682	7	8.1	5	5	1.0547	1.1944	0.0771498	11.548	4	13.6	9	9	1.0527	1.1537	0.0620929	13.682	9
	2183	Tb927.9.14200	Tb927.9.14200		hypothetical protein, conserved	44.532	20.7	0	42.425	1	1	1.02991	0.0127975	0.173552	0.760569		13.2	4	4	0.848536	1.00824	0.00356263	10.374	4	10.6	3	3	0.88132	1.0025	0.00108438	20.373	4	17.6	5	5	0.98761	1.0808	0.0337453	8.9552	5
	1742	Tb927.7.2190	Tb927.7.2190		hypothetical protein, conserved	29.242	20.7	0	38.102	1		0.992196	-0.00340257	0.685759	0.163829		20.7	5	5	0.832085	0.987849	-0.00530926	2.6686	6	20.7	5	5	0.86277	0.97111	-0.0127316	2.5005	5	20.7	5	5	0.94773	1.0182	0.00783309	4.1966	6
	887	Tb927.11.16860	Tb927.11.16860	MRB8620	mitochondrial RNA binding protein (MRB8620)	53.077	20.7	0	20.792	1	1	0.990404	-0.00418761	0.562542	0.249845		14.5	5	5	0.87321	1.04736	0.0200968	22.359	5	13.7	4	4	0.93306	1.0435	0.0184925	18.228	3	14.1	5	5	0.82682	0.88889	-0.051152	48.917	5
	1838	Tb927.7.5630	Tb927.7.5630		hypothetical protein, conserved	73.156	20.7	0	34.071	1	1	0.981543	-0.00809067	0.635923	0.196595		15.3	9	9	0.894454	1.07406	0.0310269	13.492	10	9	5	5	0.81853	0.91886	-0.0367507	13.716	5	17	9	9	0.89849	0.95819	-0.0185484	20.813	10
	407	Tb927.10.14510	Tb927.10.14510		hypothetical protein, conserved	95.105	20.7	0	131.32	1		1.01493	0.00643657	0.146095	0.835365		10.2	5	5	0.861104	1.02933	0.0125525	14.188	4	17.6	9	9	0.88097	0.9944	-0.00243888	17.771	10	14.2	8	8	0.91518	1.0214	0.00919585	24.142	7
	719	Tb927.6.720;Tb927.11.11230	Tb927.6.720;Tb927.11.11230		40S ribosomal protein L14, putative;60S ribosomal protein L14, putative	21.443	20.6	0	11.055	2		1.12548	0.0513378	0.392786	0.405844		16.9	3	3	0.498977	0.59011	-0.229067	84.254	2	10.1	2	2	1.958	2.2049	0.343389	45.186	4	16.9	3	3	1.0107	1.0957	0.0396917	80.948	3
	2011	Tb927.8.5460;Tb927.8.5465;Tb927.8.5440;Tb11.v5.0798;Tb11.v5.0797;Tb927.8.5470	Tb927.8.5460;Tb927.8.5465;Tb927.8.5440;Tb11.v5.0798;Tb11.v5.0797	Tb-24;Tb-44;Tb-24;Tb-17	flagellar calcium-binding protein,44 kDa calflagin,44 kDa calcimedin (Tb-44);flagellar calcium-binding protein,24 kDa calflagin,24 kDa calcimedin (Tb-24);flagellar calcium-binding protein,24 kDa calflagin,24 kDa calcimedin (Tb-24);flagellar calcium-bind	45.718	20.6	0	87.643	6		1.01521	0.00655551	0.334787	0.475232		13	3	3	0.794597	0.956938	-0.0191163	20.455	5	16	4	4	0.91901	1.0322	0.0137639	14.108	6	20.6	5	5	0.98608	1.0593	0.025019	10.678	6
	740	Tb927.11.11780	Tb927.11.11780		acyl-CoA dehydrogenase, putative	66.634	20.6	0	90.261	1	1	1.00161	0.000699723	0.478469	0.320146		17.1	7	7	0.851789	1.00841	0.00363714	49.289	7	14.8	6	6	0.84615	0.95392	-0.020488	42.285	6	18.8	8	8	0.96538	1.0446	0.01895	3.7586	11
	297	Tb927.10.10420	Tb927.10.10420		monothiol glutaredoxin, putative	14.888	20.6	0	9.1364	1	1	0.979963	-0.0087904	0.738592	0.131595		20.6	2	2	0.776277	0.929714	-0.0316508	75.773	4	10.7	1	1	0.87858	1.0036	0.00156065	NaN	1	20.6	2	2	0.92863	1.0086	0.00371896	9.9439	2
	2190	Tb927.9.15010	Tb927.9.15010		hypothetical protein, conserved	23.182	20.6	0	12.015	1	1	0.97536	-0.010835	0.825209	0.0834361		11.3	2	2	0.839137	1.00524	0.00226847	8.5775	2	11.3	2	2	0.82856	0.93769	-0.0279407	13.069	2	20.6	4	4	0.91249	0.98439	-0.00683281	3.2517	3
	2088	Tb927.8.8120	Tb927.8.8120		hypothetical protein, conserved	30.085	20.5	0	118.03	1		1.56044	0.193248	0.240767	0.618403		11.2	2	2	3.64073	4.3712	0.640601	NaN	1	9.3	2	2	0.7353	0.83525	-0.0781835	10.431	2	16.8	3	3	0.97132	1.0407	0.0173256	42.969	3
	1905	Tb927.8.1190;Tb927.8.1170;Tb11.v5.0871	Tb927.8.1190;Tb927.8.1170;Tb11.v5.0871		hypothetical protein, conserved;hypothetical protein, conserved;hypothetical protein, conserved	36.419	20.5	0	10.489	3		1.13046	0.0532568	0.142223	0.847029		3.9	1	1	0.839772	1.00373	0.00161864	NaN	1	17.8	3	3	0.95668	1.0808	0.0337453	7.1772	3	6.6	2	2	1.2322	1.3317	0.124406	14.212	3
	856	Tb927.11.15930	Tb927.11.15930		hypothetical protein, conserved	17.511	20.4	0	14.188	1		1.07155	0.0300135	0.342822	0.464931		10.2	1	1	1.01238	1.21835	0.0857731	9.3273	3	0	0	0	NaN	NaN		NaN	0	20.4	2	2	0.86995	0.94244	-0.0257463	11.026	2
	892	Tb927.11.1700	Tb927.11.1700		hypothetical protein, conserved	61.63	20.4	0	45.271	1	1	1.03297	0.0140884	0.315442	0.501081		11.4	3	3	0.777484	0.927472	-0.0326993	20.798	4	15.1	4	4	0.9854	1.1302	0.0531553	26.148	6	10.4	3	3	0.97686	1.0515	0.0218093	18.292	4
	2135	Tb927.9.11900	Tb927.9.11900		acyl transferase-like protein	60.778	20.4	0	36.81	1	1	1.05727	0.0241845	0.183559	0.736224		10.7	4	4	0.972195	1.16378	0.0658705	19.411	4	9.5	4	4	0.897	1.015	0.00646604	26.211	4	15.6	6	6	0.9328	1.0005	0.000217093	28.456	6
	1122	Tb927.11.9590	Tb927.11.9590		S-adenosylhomocysteine hydrolase, putative	48.447	20.4	0	25.89	1		0.998938	-0.000461608	0.533963	0.272489		13.5	6	6	0.853971	1.01485	0.00640057	18.972	6	14	5	5	0.88978	1.0044	0.0019067	3.9483	5	14	6	6	0.91329	0.97793	-0.00969223	5.4759	6
	834	Tb927.11.15150	Tb927.11.15150		1-acyl-sn-glycerol-3-phosphate acyltransferase, putative	30.359	20.3	0	27.564	1		1.01892	0.00813988	0.370052	0.431738		20.3	3	3	0.816127	0.943931	-0.0250599	9.1048	6	20.3	3	3	0.86984	1.0032	0.00138752	4.6783	5	20.3	3	3	1.0511	1.1171	0.0480921	9.0796	5
	1261	Tb927.3.2840	Tb927.3.2840		inorganic pyrophosphatase, putative	28.675	20.3	0	9.9458	1	1	0.926645	-0.0330865	0.771105	0.112887		20.3	3	3	0.907194	1.07807	0.0326486	28.039	3	10.7	2	2	0.71473	0.80824	-0.0924597	39.55	2	20.3	3	3	0.81889	0.91317	-0.0394484	21.941	3
	315	Tb927.10.11160	Tb927.10.11160		HIRA-interacting protein 5, putative	26.717	20.2	0	12.309	1	1	1.37189	0.13732	0.123953	0.906743		7.8	1	1	1.59627	1.88484	0.275274	NaN	1	6.2	1	1	1.2748	1.4277	0.154637	NaN	1	6.2	1	1	0.88497	0.95951	-0.0179505	NaN	1
	961	Tb927.11.3940	Tb927.11.3940		hypothetical protein, conserved	36.265	20.2	0	12.389	1	1	1.09621	0.0398946	0.161495	0.791841		11.5	3	3	0.87535	1.02734	0.0117129	3.8417	3	10.6	3	3	0.90356	1.0158	0.00680821	11.406	3	17.1	5	5	1.1676	1.2623	0.101163	13.133	4
	2028	Tb927.8.6000	Tb927.8.6000		fatty acid desaturase, putative	49.385	20.2	0	4.8966	1		0.795904	-0.0991391	0.787133	0.103952		2.1	1	1	0.441267	0.517223	-0.286322	NaN	1	14.8	3	3	1.0041	1.1354	0.0551489	4.5407	2	5.3	2	2	0.77356	0.85853	-0.0662445	NaN	1
	1008	Tb927.11.5530	Tb927.11.5530		hypothetical protein, conserved	29.304	20.2	0	49.954	1	1	1.01048	0.0045268	0.443948	0.352668		11.5	2	2	0.890393	1.06535	0.0274919	5.676	2	5.3	1	1	0.78569	0.88737	-0.0518953	NaN	1	16.4	3	3	1.0067	1.0914	0.0379839	12.341	3
	672	Tb927.11.4300;Tb927.10.9880	Tb927.11.4300;Tb927.10.9880	TbL18LP;RPL18	60S ribosomal protein L18, putative (RPL18);60S ribosomal protein L18, putative (TbL18LP)	21.874	20.2	0	6.2994	2		0.961861	-0.0168877	0.774669	0.110884		7.8	1	1	0.829807	0.961723	-0.0169498	21.007	2	7.8	1	1	0.92114	1.0342	0.0146045	5.8236	2	20.2	3	3	0.83733	0.89471	-0.0483177	13.524	4
	765	Tb927.11.13050;Tb927.11.13040;Tb927.11.13030;Tb927.11.13020	Tb927.11.13050;Tb927.11.13040;Tb927.11.13030;Tb927.11.13020		calmodulin;calmodulin;calmodulin;calmodulin	16.838	20.1	0	14.358	4		0.270927	-0.567148	0.765452	0.116082		20.1	3	3	0.887075	1.0371	0.0158194	107.92	3	11.4	1	1	0.012377	0.014264	-1.84576	NaN	1	20.1	2	2	1.2578	1.3443	0.128496	22.753	2
	976	Tb927.11.4540	Tb927.11.4540	TbNup48	nucleoporin 48 (TbNup48)	48.494	20.1	0	20.692	1		1.02576	0.0110468	0.395506	0.402847		11.7	4	4	0.785299	0.941886	-0.0260018	12.979	3	14.3	4	4	1.0707	1.2138	0.0841471	23.249	4	20.1	6	6	0.86883	0.94405	-0.025005	10.236	5
	569	Tb927.10.5770	Tb927.10.5770	VCP	valosin-containing protein homolog,Transitional endoplasmic reticulum ATPase, putative (VCP)	85.825	20.1	0	80.083	1		0.987111	-0.00563385	0.605215	0.21809		11.8	6	6	0.865801	1.01738	0.00748192	4.898	7	15.6	7	7	0.81365	0.90747	-0.0421677	19.506	8	16.7	8	8	0.96609	1.0418	0.0177844	4.8906	9
	1069	Tb927.11.7540	Tb927.11.7540		electron-transfer-flavoprotein, alpha polypeptide, putative	33.861	20.1	0	195.53	1		0.975751	-0.0106609	0.736716	0.1327		13	2	2	0.843384	0.990786	-0.00402027	12.982	2	20.1	3	3	0.80503	0.9171	-0.0375833	11.389	4	20.1	3	3	0.9576	1.0224	0.00962084	17.107	5
	1135	Tb927.11.980	Tb927.11.980	TbNup158	Nucleoporin (TbNup158)	158.38	20.1	0	115.33	1		1.00958	0.00413879	0.222116	0.65342		13.7	14	14	0.853242	0.994135	-0.00255481	12.629	16	14.4	15	15	0.90773	1.0289	0.0123732	33.206	17	13.4	16	16	0.93304	1.006	0.00259798	7.1335	17
	1858	Tb927.7.6270	Tb927.7.6270		peptidase t, putative,aminotripeptidase, putative	44.647	20	0	37.676	1		1.04836	0.0205109	0.338101	0.470954		17	5	5	0.775434	0.898796	-0.046339	16.394	6	17	5	5	1.116	1.2562	0.0990588	22.678	5	11.3	3	3	0.94855	1.0205	0.00881301	15.586	4
	1569	Tb927.5.920	Tb927.5.920		hypothetical protein, conserved	50.734	20	0	21.365	1	1	1.06255	0.0263496	0.301543	0.52065		11.6	3	3	0.942596	1.10261	0.0424215	24.605	3	7.3	2	2	1.0811	1.2349	0.0916318	13.4	3	20	6	6	0.80372	0.88104	-0.0550044	70.278	6
	937	Tb927.11.3060	Tb927.11.3060		hypothetical protein, conserved	21.018	20	0	25.255	1		0.983048	-0.00742539	0.544385	0.264094		7.2	1	1	0.764467	0.861698	-0.0646452	NaN	1	7.2	1	1	0.74139	0.85503	-0.0680186	NaN	1	12.8	2	2	1.2001	1.2894	0.110388	67.261	3
	1825	Tb927.7.5110	Tb927.7.5110		hypothetical protein, conserved	62.367	20	0	64.063	1	1	1.01645	0.00708635	0.421771	0.374924		7.6	2	2	0.98912	1.14819	0.0600119	5.9423	3	9.7	3	3	0.91236	1.0248	0.0106391	9.5909	4	12.7	4	4	0.82269	0.8925	-0.0493918	18.75	5
	1099	Tb927.11.8980	Tb927.11.8980	EF-G2	elongation factor G2-like protein	90.047	20	0	82.882	1	1	1.01488	0.00641491	0.326995	0.485458		10.4	6	6	0.83675	0.987947	-0.00526635	52.803	7	13.7	7	7	0.87315	0.98516	-0.00649323	16.346	7	9.5	5	5	0.98019	1.074	0.0310043	41.289	5
	1064	Tb927.11.7390	Tb927.11.7390		hypothetical protein, conserved	34.924	20	0	12.933	1	1	0.984399	-0.0068288	0.662656	0.178712		7.5	1	1	0.776036	0.92285	-0.034869	NaN	1	8.1	1	1	0.903	1.0194	0.00834463	NaN	1	4.4	1	1	0.92847	1.014	0.00603795	NaN	1
	119	Tb927.11.18680;Tb11.0845	Tb927.11.18680;Tb11.0845	DYNLL2;DYNLL1	dynein light chain LC8, putative (DYNLL1);dynein light chain LC8, putative (DYNLL2)	10.429	20	0	5.0164	2		0.989548	-0.00456307	0.66209	0.179083		12.2	1	1	0.848105	1.01312	0.00566089	NaN	1	12.2	1	1	0.89549	1.0093	0.00402027	NaN	1	20	2	2	0.87879	0.94761	-0.0233704	1.9976	2
	534	Tb927.10.4200	Tb927.10.4200		hypothetical protein, conserved	99.871	19.9	0	66.819	1		1.07745	0.0323969	0.289203	0.538797		18.4	13	13	0.75683	0.893655	-0.0488301	17.923	13	8.8	5	5	1.1687	1.3223	0.12133	29.516	5	14.8	11	11	0.98429	1.0585	0.0246909	12.869	11
	1025	Tb927.11.6000	Tb927.11.6000		hypothetical protein, conserved	40.82	19.9	0	38.968	1	1	0.921812	-0.0353578	0.744475	0.12815		10.3	3	3	0.975419	1.13157	0.0536803	43.405	3	15.4	4	4	0.73334	0.8229	-0.0846529	13.962	4	9.1	3	3	0.7681	0.8412	-0.0751007	11.884	3
	662	Tb927.10.9390	Tb927.10.9390		hypothetical protein, conserved	36.684	19.9	0	29.5	1	1	1.01094	0.00472501	0.425795	0.370799		16.8	4	4	0.839983	1.01186	0.00512	12.606	5	14.4	3	3	0.98118	1.1043	0.0430871	15.19	5	17.4	4	4	0.85136	0.92463	-0.034032	6.9838	5
	152	Tb927.7.4520;Tb11.v5.0265	Tb927.7.4520;Tb11.v5.0265		hypothetical protein, conserved;hypothetical protein, conserved	22.315	19.9	0	8.5736	2		0.889424	-0.0508911	0.833718	0.0789809		7.5	1	1	0.886997	1.04647	0.0197284	NaN	1	19.9	3	3	0.6597	0.7598	-0.119301	15.637	3	6	1	1	0.82833	0.88491	-0.0531009	NaN	1
	1926	Tb927.8.1960	Tb927.8.1960		hypothetical protein, conserved	48.425	19.8	0	26.034	1		1.09581	0.0397337	0.0769208	1.11396		9.7	3	3	0.853607	1.01041	0.00449635	9.9598	5	12.7	4	4	1.0227	1.1487	0.0602066	9.3988	4	19.8	7	7	1.0518	1.1337	0.0544981	1.6872	7
	282	Tb927.1.840	Tb927.1.840		hypothetical protein, conserved	27.104	19.7	0	33.094	1	1	0.957588	-0.0188211	0.730739	0.136238		16.3	4	4	0.732654	0.879121	-0.0559514	17.736	5	16.3	4	4	0.93442	1.0721	0.0302353	14.219	4	15.9	4	4	0.84916	0.93165	-0.0307472	3.4378	4
	1472	Tb927.5.1160	Tb927.5.1160		hypothetical protein, conserved	25.569	19.7	0	65.653	1		0.988485	-0.00502973	0.653378	0.184836		15.4	4	4	0.793336	0.94518	-0.0244857	6.5766	5	9.2	3	3	0.88004	0.99009	-0.00432533	15.578	4	19.7	5	5	0.94323	1.0321	0.0137218	9.4566	5
	1660	Tb927.6.4160	Tb927.6.4160		hypothetical protein, conserved	47.703	19.7	0	36.974	1	1	0.996015	-0.00173394	0.549059	0.260381		3.4	1	1	0.818331	0.96918	-0.0135956	NaN	1	10.5	3	3	0.94006	1.0547	0.0231289	25.316	4	9.2	3	3	0.89161	0.96664	-0.0147352	10.298	3
	2002	Tb927.8.5030	Tb927.8.5030		trafficking protein particle complex subunit 3, putative,TRAPP, putative,transport protein particle (TRAPP) component, Bet3, putative	20.947	19.7	0	10.711	1		0.985978	-0.00613296	0.647261	0.188921		7.8	1	1	0.875657	1.03416	0.0145869	NaN	1	14	2	2	0.81953	0.92686	-0.0329859	11.428	3	11.9	2	2	0.93687	1	0	23.564	2
	626	Tb927.10.8070	Tb927.10.8070		ATPase, putative	55.555	19.7	0	75.448	1		0.932414	-0.0303912	0.867272	0.0618445		13.8	4	4	0.847027	0.997506	-0.0010844	3.9727	4	14.6	4	4	0.84593	0.95094	-0.0218469	19.807	4	12.8	4	4	0.79177	0.85459	-0.0682422	6.4318	4
	236	Tb927.1.1390	Tb927.1.1390		hypothetical protein, conserved	28.393	19.6	0	28.153	1	1	1.13452	0.0548111	0.280113	0.552667		12.2	1	1	0.758208	0.894614	-0.0483641	NaN	1	19.6	3	3	0.89573	1.0056	0.00242526	12.39	4	3.7	1	1	1.5258	1.6232	0.210372	NaN	1
	281	Tb927.1.750	Tb927.1.750		hypothetical protein, conserved	132.69	19.6	0.001857	2.3148	1		0.981152	-0.00826351	0.577191	0.238681		19.6	1	1	0.789765	0.908513	-0.0416689	NaN	1	0	0	0	NaN	NaN		NaN	0	19.6	1	1	0.97624	1.0596	0.0251419	6.3101	2
	804	Tb927.11.14090	Tb927.11.14090		hypothetical protein, conserved	51.674	19.6	0	79.71	1		0.981551	-0.00808708	0.818499	0.086982		11.5	4	4	0.8296	0.967305	-0.0144365	7.9052	4	12.7	4	4	0.85853	0.9648	-0.0155627	11.204	4	16.2	7	7	0.93927	1.0133	0.00573804	16.459	8
	248	Tb927.1.2550;Tb927.1.2530;Tb927.1.2510;Tb927.1.2490;Tb927.1.2470;Tb927.1.2450;Tb927.1.2430	Tb927.1.2550;Tb927.1.2530;Tb927.1.2510;Tb927.1.2490;Tb927.1.2470;Tb927.1.2450;Tb927.1.2430		histone H3, putative;histone H3, putative;histone H3, putative;histone H3, putative;histone H3, putative;histone H3, putative;histone H3, putative	14.75	19.5	0	14.322	7		1.07684	0.0321523	0.157715	0.802127		19.5	1	1	0.853607	1.00915	0.00395702	NaN	1	19.5	1	1	0.90863	1.0284	0.0121621	NaN	1	19.5	1	1	1.1182	1.2032	0.0803378	NaN	1
	605	Tb927.10.7380	Tb927.10.7380		hypothetical protein, conserved	39.706	19.5	0	7.208	1	1	0.965153	-0.0154039	0.600037	0.221822		3.7	1	1	0.926698	1.09425	0.0391158	NaN	1	19.5	3	3	0.96439	1.0883	0.0367486	25.29	3	15.8	2	2	0.69062	0.75496	-0.122076	20.97	2
	2110	Tb927.9.10520	Tb927.9.10520		hypothetical protein, conserved	29.587	19.4	0	20.166	1	1	1.02368	0.0101645	0.297468	0.52656		9.1	2	2	0.803859	0.951384	-0.0216441	3.6408	3	14.6	3	3	0.92794	1.0484	0.020527	19.148	3	13.8	3	3	1.0036	1.0755	0.0316104	6.4847	3
	303	Tb927.10.10740	Tb927.10.10740		hypothetical protein, conserved	70.02	19.4	0	65.039	1		1.01573	0.00677767	0.346983	0.459692		7.3	3	3	0.847027	0.992063	-0.00346053	6.6388	4	15.8	7	7	0.86158	0.97195	-0.0123561	30.131	7	13.2	5	5	1.0041	1.0868	0.0361496	9.4016	4
	1220	Tb927.3.1450;Tb927.3.1530	Tb927.3.1450;Tb927.3.1530		hypothetical protein, conserved;hypothetical protein, conserved	43.307	19.4	0	23.319	2		0.977827	-0.00973776	0.635044	0.197196		7.7	2	2	0.758956	0.911411	-0.0402858	12.921	3	16.1	4	4	0.97543	1.0935	0.0388188	35.485	4	15.8	4	4	0.86574	0.93811	-0.0277462	24.153	4
	375	Tb927.10.13430	Tb927.10.13430		citrate synthase, putative	53.584	19.4	0	47.227	1	1	1.01146	0.00494993	0.44075	0.355807		11.8	5	5	0.970309	1.15588	0.0629135	21.791	5	14.9	8	8	0.85166	0.9633	-0.0162384	3.4043	8	13.8	7	7	0.86102	0.92934	-0.0318254	27.924	9
	462	Tb927.10.6370;Tb927.10.220	Tb927.10.6370;Tb927.10.220		60S ribosomal proteins L37, putative;60S ribosomal protein L37a, putative	10.458	19.4	0	11.506	2		1.00607	0.00262732	0.445227	0.351418		19.4	1	1	0.888257	1.06191	0.0260873	NaN	1	19.4	1	1	0.90913	1.0277	0.0118664	NaN	1	19.4	1	1	0.8609	0.9331	-0.0300718	NaN	1
	1768	Tb927.7.3050	Tb927.7.3050		hypothetical protein, conserved	131.58	19.3	0	104.38	1	1	1.00846	0.00365915	0.384133	0.415519		11.8	7	7	0.813736	0.966277	-0.0148984	8.1737	6	13.9	9	9	0.93328	1.0537	0.022717	15.624	9	13.6	9	9	0.92269	1.0073	0.00315883	6.0367	8
	1433	Tb927.4.4310	Tb927.4.4310	TbNup64	Nucleoporin (TbNup64)	64.234	19.3	0	50.154	1		0.944533	-0.024783	0.903216	0.0442086		12.4	7	6	0.749906	0.891902	-0.0496831	20.253	7	7.4	4	3	0.85455	0.95975	-0.0178419	12.4	4	16.9	10	9	0.90098	0.98441	-0.00682398	20.945	13
	1161	Tb927.2.3180;Tb11.v5.0782	Tb927.2.3180;Tb11.v5.0782	KPAF1	kinetoplast polyadenylation/uridylation factor 1 (PPR1);hypothetical protein, conserved	114.38	19.3	0	69.741	2	1	0.960438	-0.0175308	0.803949	0.0947718		10.3	7	7	0.845023	1.01492	0.00643138	26.001	8	15.1	11	11	0.86989	0.97578	-0.0106481	23.563	14	14.6	10	10	0.82463	0.89459	-0.048376	41.7	13
	1757	Tb927.7.2690	Tb927.7.2690		hypothetical protein, conserved	14.017	19.2	0	4.6273	1	1	1.0393	0.0167411	0.420145	0.376601		0	0	0	NaN	NaN		NaN	0	9.2	1	1	0.78628	0.89416	-0.0485848	NaN	1	10	1	1	1.1185	1.208	0.0820669	NaN	1
	1792	Tb927.7.3750	Tb927.7.3750		TFIIF-stimulated CTD phosphatase, putative	22.571	19.2	0	5.8042	1	1	0.974911	-0.0110351	0.663738	0.178004		5.1	1	1	0.792519	0.95039	-0.0220983	NaN	1	19.2	3	3	0.79228	0.9051	-0.0433034	21.092	3	5.1	1	1	0.99404	1.0772	0.0322963	NaN	1
	530	Tb927.10.4080	Tb927.10.4080		hypothetical protein, conserved	127.1	19.2	0	40.112	1	1	0.965825	-0.0151016	0.71485	0.145785		14	3	3	0.895897	1.05196	0.0219976	10.745	3	15.6	4	4	0.783	0.87999	-0.0555223	21.723	4	16.1	6	6	0.90364	0.97324	-0.01178	6.2347	6
	2255	Tb927.9.5320	Tb927.9.5320		nucleolar RNA binding protein, putative	46.864	19.2	0	37.427	1		0.966237	-0.0149162	0.862006	0.0644897		12.6	4	4	0.828226	0.976276	-0.0104272	3.068	5	10.3	3	3	0.89172	0.99955	-0.000195477	3.651	3	19.2	5	5	0.85337	0.92443	-0.034126	5.4551	5
	1790	Tb927.7.3630	Tb927.7.3630		TPR-repeat-containing chaperone protein DNAJ, putative	60.135	19.1	0	43.652	1		0.964814	-0.0155562	0.647828	0.18854		12.3	5	5	0.916758	1.07868	0.0328922	13.242	5	9.1	3	3	0.72426	0.82257	-0.0848271	11.868	3	13.3	5	5	0.93205	1.0122	0.00526633	11.618	4
	860	Tb927.11.15990	Tb927.11.15990	TbNup109	nucleoporin Nup109 (TbNup109)	108.72	19.1	0	70.902	1		1.0367	0.0156517	0.299727	0.523274		13.4	10	10	0.960338	1.1577	0.0635968	15.448	10	12.9	10	10	0.83955	0.94968	-0.0224227	35.273	10	12.3	10	10	0.94643	1.0134	0.0057809	16.841	10
	2269	Tb927.9.6270	Tb927.9.6270		hypothetical protein, conserved	57.132	19.1	0	32.812	1		0.854678	-0.0681976	0.912732	0.0396567		13.4	3	3	0.624064	0.748111	-0.126034	57.388	3	10.2	3	3	0.76394	0.85758	-0.0667254	13.114	4	16.3	4	4	0.89762	0.97312	-0.0118336	32.267	4
	1818	Tb927.7.460	Tb927.7.460	TbPFT	protein farnesyltransferase beta subunit (TbPFT)	65.418	19.1	0	38.653	1		1.07532	0.0315397	0.113203	0.946143		16.1	7	7	0.979912	1.16443	0.066113	17.148	7	12.6	5	5	0.93817	1.058	0.0244857	11.594	5	14.2	6	6	0.92174	1.0093	0.00402027	13.817	5
	1502	Tb927.5.2250;Tb927.5.2220;Tb927.5.2190	Tb927.5.2250;Tb927.5.2220;Tb927.5.2190		hypothetical protein, conserved;hypothetical protein, conserved;hypothetical protein, conserved	48.809	19.1	0	30.171	3		0.943139	-0.0254241	0.818127	0.0871795		16.6	5	5	0.877809	1.02076	0.00892449	4.7841	5	11	3	3	0.76645	0.85931	-0.0658501	23.515	3	19.1	6	6	0.8778	0.95643	-0.0193468	14.953	5
	1438	Tb927.8.7980;Tb927.4.4380	Tb927.8.7980;Tb927.4.4380	PPase1;TVP1	vacuolar-type proton translocating pyrophosphatase 1 (TVP1);vacuolar-type proton translocating pyrophosphatase 1, putative (PPase1)	86.003	19.1	0	149.09	2		0.956169	-0.0194654	0.741545	0.129862		16.2	8	8	0.869036	1.0271	0.0116148	7.6154	9	17.9	11	11	0.87842	0.99723	-0.00120466	8.6537	13	17.4	9	9	0.7944	0.85348	-0.0688067	14.405	11
	1084	Tb927.11.8380	Tb927.11.8380	CPR	NADPH--cytochrome p450 reductase, putative (CPR)	70.946	19.1	0	51.772	1		0.984946	-0.00658763	0.642325	0.192245		13.5	7	2	0.89662	1.05866	0.0247565	5.8298	2	13.7	7	1	0.8417	0.94741	-0.023462	7.5987	2	12.3	7	2	0.88534	0.95267	-0.0210575	9.8659	2
	2061	Tb927.8.6800	Tb927.8.6800		hypothetical protein, conserved	64.661	19	0	32.483	1	1	1.08537	0.0355782	0.231264	0.635892		9.6	3	3	0.802568	0.956572	-0.0192825	13.356	2	1.9	1	1	1.1452	1.2947	0.112169	NaN	1	13.8	6	6	0.94667	1.0324	0.013848	14.643	6
	697	Tb927.11.10390	Tb927.11.10390		hypothetical protein, conserved	86.03	19	0	52.83	1	1	0.981224	-0.00823194	0.732257	0.135337		15.6	9	9	0.860363	1.02733	0.0117087	26.867	10	15.5	8	8	0.8645	0.97777	-0.00976329	32.276	9	14.1	8	8	0.87566	0.9405	-0.0266412	13.496	8
	1791	Tb927.7.3710	Tb927.7.3710		hypothetical protein, conserved	51.815	18.9	0	16.634	1		0.58684	-0.23148	0.797885	0.0980598		10.6	4	4	0.176794	0.212445	-0.672753	220.81	2	8.1	3	3	0.87279	0.98747	-0.00547609	19.782	3	8.3	3	3	0.89492	0.96336	-0.0162114	10.707	4
	277	Tb927.1.700;Tb927.1.710	Tb927.1.700;Tb927.1.710	PGKC;PGKB	phosphoglycerate kinase (PGKC);phosphoglycerate kinase (PGKB)	47.245	18.9	0	29.466	2		0.952161	-0.0212896	0.701491	0.153978		7.7	2	1	0.690608	0.820614	-0.0858612	NaN	1	7.7	2	1	0.95474	1.0727	0.0304783	12.372	2	15	4	1	0.91187	0.98065	-0.00848597	8.056	2
	1403	Tb927.4.3160	Tb927.4.3160	DAT	dihydroxyacetone phosphate acyltransferase, putative (DAT)	137.14	18.9	0	70.162	1		1.03206	0.0137036	0.193467	0.713394		13.1	10	10	0.854263	1.02352	0.0100963	19.252	10	11.7	8	8	0.96874	1.0887	0.0369082	8.574	9	10.1	7	7	0.9136	0.98652	-0.00589411	9.3234	7
	1751	Tb927.7.2410	Tb927.7.2410		hypothetical protein, conserved	66.378	18.8	0	52.381	1	1	1.0276	0.0118236	0.175641	0.755374		7.5	5	5	0.828295	0.983962	-0.00702189	19.716	5	12.8	7	7	0.95289	1.0616	0.0259609	22.861	7	12.3	7	7	0.96324	1.0388	0.0165319	13.746	7
	1619	Tb927.6.2560	Tb927.6.2560		hypothetical protein, conserved	34.164	18.8	0	17.306	1		0.884205	-0.053447	0.814502	0.0891078		16.2	2	2	0.630358	0.743992	-0.128432	0.478	2	10.4	1	1	0.96507	1.0772	0.0322963	2.4304	2	18.8	3	3	0.80284	0.86257	-0.0642057	50.885	4
	766	Tb927.11.13080	Tb927.11.13080		hypothetical protein, conserved	54.147	18.8	0	28.261	1		1.01351	0.00582794	0.213773	0.670047		15.6	5	5	0.832639	0.990491	-0.00414938	8.5646	5	18.8	6	6	0.89797	1.0124	0.00535214	14.426	7	10.5	3	3	0.96687	1.0382	0.016281	5.118	4
	2291	Tb927.9.7470	Tb927.9.7470	NT10	purine nucleoside transporter (NT10)	50.675	18.8	0	230.59	1		1.01763	0.00758788	0.288746	0.539484		16.2	6	6	0.862664	1.03059	0.0130851	10.041	7	16.2	6	6	0.85977	0.96712	-0.0145196	4.9632	8	18.8	7	7	0.97182	1.0573	0.0241982	5.84	10
	1119	Tb927.11.9560	Tb927.11.9560		oxidoreductase, putative	58.621	18.8	0	48.754	1	1	1.06322	0.0266249	0.0639881	1.1939		16.5	6	6	0.931619	1.10926	0.0450341	13.315	5	14.7	5	5	0.95146	1.0627	0.0264107	10.218	5	16.9	6	6	0.94923	1.0196	0.00842983	11.439	8
	1352	Tb927.3.960	Tb927.3.960		protein transport protein Sec61 gamma subunit, putative	7.6681	18.8	0.0088028	1.8275	1			NaN				18.8	1	1	NaN	NaN		NaN	0	18.8	1	1	NaN	NaN		NaN	0	18.8	1	1	NaN	NaN		NaN	0
	464	Tb927.10.2230	Tb927.10.2230		adrenodoxin reductase, putative,ferredoxin NADP reductase-like protein	65.601	18.7	0	48.423	1	1	1.08535	0.0355687	0.183264	0.736922		12.3	6	6	0.864155	1.02163	0.00929279	14.478	7	16.3	6	6	1.1069	1.2497	0.0968058	19.203	7	7.8	4	4	0.92738	1.0014	0.000607587	4.4201	5
	264	Tb927.1.4050	Tb927.1.4050		protein phosphatase with EF-Hand domains (PPEF),ser/thr protein phosphatase, putative	105.75	18.7	0	58.963	1		0.976102	-0.0105048	0.574929	0.240386		9.5	6	6	0.681663	0.808931	-0.0920887	25.418	6	11.5	8	8	0.85314	0.96215	-0.0167572	6.2671	8	15.5	11	11	1.1021	1.1949	0.0773316	20.535	10
	823	Tb927.11.14770	Tb927.11.14770		hypothetical protein, conserved	27.841	18.7	0	14.167	1		0.948865	-0.0227955	0.625935	0.203471		18.7	2	2	1.05689	1.25353	0.098133	50.623	2	6	1	1	0.77045	0.8709	-0.0600317	NaN	1	18.7	2	2	0.729	0.78255	-0.106488	7.7337	2
	2228	Tb927.9.3370	Tb927.9.3370	trx	thioredoxin (trx)	12.135	18.7	0	8.6501	1	1	1.00992	0.0042882	0.41696	0.379906		18.7	2	2	0.785731	0.932227	-0.0304783	6.8373	2	10.3	1	1	0.91173	1.0317	0.0135534	NaN	1	18.7	2	2	0.99218	1.071	0.0297895	NaN	1
	509	Tb927.10.3570;Tb11.v5.1042	Tb927.10.3570	KREX2	KREX2 (KREX2)	99.416	18.7	0	110.29	2	1	1.00316	0.00137146	0.473376	0.324794		7.8	6	6	0.77997	0.926526	-0.0331422	18.98	7	13.2	10	10	0.94774	1.068	0.0285713	22.902	12	16.4	11	11	0.94083	1.0202	0.00868532	26.788	13
	363	Tb927.10.12910;Tb11.v5.0593	Tb927.10.12910;Tb11.v5.0593		hypothetical protein, conserved;hypothetical protein, conserved	103.97	18.7	0	53.024	2	1	0.98609	-0.00608327	0.606248	0.21735		10.8	7	7	0.759244	0.901632	-0.0449707	6.8695	8	11.5	7	7	0.91829	1.0463	0.0196562	12.788	9	8.1	6	6	0.92977	1.0164	0.00706466	15.441	5
	558	Tb927.10.520	Tb927.10.520		hypothetical protein, conserved	46.781	18.7	0	49.517	1	1	1.05239	0.0221763	0.107529	0.968475		14.4	6	6	0.864678	1.01876	0.00806975	6.9111	7	16.7	5	5	0.96758	1.1139	0.0468462	4.526	7	16.4	7	7	0.93566	1.0271	0.0116127	4.9893	9
	2091	Tb927.8.8180;Tb927.4.4150	Tb927.8.8180;Tb927.4.4150	MRB4150;MRB8180	mitochondrial RNA binding complex 1 subunit (MRB8180);mitochondrial RNA binding complex 1 subunit (MRB4150)	103.45	18.7	0	47.763	2		0.994385	-0.00244537	0.818735	0.0868569		12	9	9	0.821423	0.986875	-0.00573803	15.06	11	14.2	9	9	0.88761	1.0033	0.00143081	16.895	10	17.2	13	13	0.91405	0.99305	-0.00302888	13.625	15
	577	Tb927.10.5930;Tb927.10.5940;Tb927.10.5950;Tb11.v5.0190	Tb927.10.5930;Tb927.10.5940;Tb927.10.5950;Tb11.v5.0190		protein kinase, putative;protein kinase, putative;protein kinase, putative;protein kinase, putative	54.749	18.6	0	32.849	4		1.07206	0.0302199	0.0858638	1.06619		12.4	4	4	0.978953	1.14458	0.0586477	15.16	5	11.8	3	3	0.90386	1.0267	0.0114436	106.79	3	12.4	4	4	0.96926	1.0485	0.0205684	21.09	4
	932	Tb927.11.2920	Tb927.11.2920		glycerolphosphate mutase, putative	33.71	18.6	0	6.5927	1	1	0.929169	-0.0319052	0.85507	0.0679984		18.6	5	5	0.706115	0.840266	-0.0755834	40.304	5	4.1	1	1	0.84906	0.95844	-0.0184351	NaN	1	3.1	1	1	0.91874	0.9961	-0.00169706	NaN	1
	1715	Tb927.7.1160	Tb927.7.1160		hypothetical protein, conserved	14.631	18.5	0	34.426	1	1	1.13761	0.0559936	0.278045	0.555885		12.3	1	1	0.823452	0.975324	-0.010851	NaN	1	0	0	0	NaN	NaN		NaN	0	6.2	1	1	1.2274	1.3269	0.122838	NaN	1
	2205	Tb927.9.1780	Tb927.9.1780	SLY1	sec1 family transport protein, putative (SLY1)	69.022	18.5	0	63.318	1		1.11054	0.045535	0.125973	0.899724		9.3	4	4	1.05322	1.26382	0.101686	23.603	4	13.2	6	6	0.93316	1.0631	0.0265741	25.622	5	12.3	6	6	0.94657	1.0194	0.00834463	23.007	5
	874	Tb927.11.16510	Tb927.11.16510		hypothetical protein, conserved	16.327	18.5	0	18.641	1	1	1.00567	0.00245576	0.426629	0.369949		18.5	2	2	0.805412	0.963391	-0.0161974	44.626	3	18.5	2	2	0.88627	0.99892	-0.000469292	6.648	2	18.5	2	2	0.98641	1.0569	0.0240339	3.6906	3
	1310	Tb927.3.4790;Tb927.3.4750	Tb927.3.4790;Tb927.3.4750		aminopeptidase, putative,metallo-peptidase, Clan MA(E) Family M1;aminopeptidase, putative,metallo-peptidase, Clan MA(E) Family M1	97.251	18.5	0	66.062	2		0.975727	-0.0106719	0.854486	0.0682952		13.1	10	10	0.823045	0.981162	-0.00825941	17.463	10	10.7	7	7	0.89036	1.0022	0.000954398	5.0434	7	17.2	13	13	0.88414	0.94469	-0.0247107	8.7794	13
	1664	Tb927.6.4230	Tb927.6.4230		hypothetical protein, conserved	55.213	18.4	0	64.003	1		1.00362	0.00156744	0.483419	0.315677		12.4	4	4	0.741345	0.886918	-0.0521166	39.898	5	6.4	2	2	0.87272	0.98622	-0.00602619	24.669	3	18.4	6	6	1.0667	1.1557	0.0628451	14.375	7
	2103	Tb927.9.10010	Tb927.9.10010		chaperone protein DNAj, putative	56.711	18.4	0	26.141	1		0.991221	-0.00382956	0.548933	0.260481		9.6	4	4	0.745045	0.880514	-0.0552636	28.823	4	14.3	6	6	0.90245	1.0112	0.00483706	11.917	6	11.4	5	5	1.0239	1.0938	0.0389379	23.984	5
	909	Tb927.11.2300	Tb927.11.2300	ERF1	eukaryotic peptide chain release factor subunit 1, putative (ERF1)	50.976	18.4	0	30.87	1		1.04382	0.0186275	0.240151	0.619516		10.2	4	4	0.9522	1.14925	0.060416	10.226	4	13.5	4	4	0.90301	1.0176	0.0075771	16.396	4	18.4	6	6	0.8748	0.9725	-0.0121104	11.93	6
	2301	Tb927.9.8050	Tb927.9.8050		hypothetical protein, conserved	58.484	18.3	0	95.029	1		1.06753	0.028382	0.232952	0.632734		18.3	6	6	0.828432	0.993641	-0.00277063	8.251	6	12.2	3	3	1.0958	1.2357	0.091913	6.4194	3	11.1	3	3	0.91659	0.99084	-0.00399647	8.8855	3
	147	Tb927.10.5220;Tb11.v5.0235	Tb927.10.5220;Tb11.v5.0235		hypothetical protein, conserved;hypothetical protein, conserved	51.172	18.3	0	46.666	2	1	0.969148	-0.01361	0.698027	0.156128		9.6	3	3	0.909339	1.07113	0.0298438	13.9	4	13.4	4	4	0.82652	0.94071	-0.0265442	12.346	5	15.9	5	5	0.83689	0.90338	-0.0441295	21.93	6
	1511	Tb927.5.2890	Tb927.5.2890		hypothetical protein, conserved	236.85	18.3	0	94.489	1	1	0.967318	-0.0144307	0.821425	0.0854323		10.8	17	17	0.85492	1.02209	0.00948786	17.945	16	8.2	12	12	0.83084	0.93285	-0.0301882	17.569	12	10.8	17	17	0.87485	0.94931	-0.0225919	16.135	14
	1254	Tb927.3.2420	Tb927.3.2420		hypothetical protein, conserved	14.261	18.3	0.0018416	2.2175	1		1.0512	0.0216854				0	0	0	NaN	NaN		NaN	0	0	0	0	NaN	NaN		NaN	0	18.3	2	2	0.95854	1.0512	0.0216854	9.889	2
	1587	Tb927.6.1590	Tb927.6.1590		hypothetical protein, conserved	51.554	18.2	0	30.47	1	1	1.11775	0.0483455	0.249704	0.602575		7.9	3	3	1.21746	1.45934	0.164157	24.211	3	13.1	4	4	0.83111	0.93286	-0.0301835	24.488	5	14.8	5	5	0.95272	1.0258	0.0110627	12.485	6
	2231	Tb927.9.3600	Tb927.9.3600		hypothetical protein, conserved	35.242	18.2	0	18.618	1		0.606024	-0.21751	0.711988	0.147527		18.2	5	2	0.954198	1.14634	0.0593142	7.4336	2	7.8	2	0	NaN	NaN		NaN	0	14	4	1	0.2965	0.32038	-0.494335	NaN	1
	897	Tb927.11.180	Tb927.11.180		electron transfer flavoprotein, putative	29.949	18.2	0	14.673	1	1	1.07935	0.033162	0.166537	0.778488		13	2	2	1.04607	1.21055	0.0829831	10.536	2	18.2	4	4	0.93243	1.0527	0.0223046	20.946	4	13	2	2	0.9164	0.98673	-0.00580167	7.5814	2
	731	Tb927.11.11590	Tb927.11.11590		eukaryotic translation initiation factor, putative	46.677	18.2	0	6.7689	1		0.805003	-0.0942028	0.749707	0.125109		0	0	0	NaN	NaN		NaN	0	12.6	3	3	0.89811	1.0004	0.000173683	26.821	3	5.6	1	1	0.58346	0.64777	-0.188579	NaN	1
	2318	Tb927.9.9080	Tb927.9.9080		hypothetical protein, conserved	28.704	18.2	0	40.467	1	1	1.01283	0.00553558	0.362221	0.441026		13.8	3	3	0.799616	0.955475	-0.0197807	36.513	3	18.2	5	5	0.90597	1.0217	0.00932339	43.035	5	13.8	3	3	0.98211	1.0643	0.0270641	7.6354	3
	1340	Tb927.3.640	Tb927.3.640		hypothetical protein, conserved	32.723	18.2	0	17.165	1		0.997469	-0.00110053	0.848792	0.0711986		4.1	1	1	NaN	NaN		NaN	0	15.5	3	3	0.8909	0.99877	-0.000534511	2.4412	3	6.8	2	2	0.92179	0.99617	-0.00166654	6.987	2
	760	Tb927.11.12850	Tb927.11.12850	OPB	oligopeptidase b,serine peptidase, clan SC, family S9A-like protein (OPB)	80.572	18.2	0	133.35	1	1	0.901369	-0.0450972	0.815831	0.0883996		11	5	5	0.811557	0.962001	-0.0168245	15.801	5	12.6	6	6	0.89846	1.0092	0.00397724	5.957	7	6.7	4	4	0.69615	0.75432	-0.122444	11.996	3
	1285	Tb927.3.3660	Tb927.3.3660		hypothetical protein, conserved	29.594	18.2	0	14.33	1	1	0.97704	-0.0100874	0.894894	0.0482285		13.3	3	3	0.834934	0.956389	-0.0193656	22.067	3	8.7	2	2	0.87561	0.99953	-0.000204166	2.0362	2	18.2	4	4	0.9006	0.97568	-0.0106926	17.644	5
	1777	Tb927.7.3280	Tb927.7.3280		translation initiation factor IF-2, putative	79.66	18.2	0	39.509	1	1	0.918411	-0.036963	0.96486	0.0155358		12.1	4	4	0.834585	0.959693	-0.0178678	8.0535	3	9.6	4	4	0.7923	0.88421	-0.0534446	74.5	2	11.9	5	5	0.84846	0.9129	-0.0395768	39.3	5
	2050	Tb927.8.6450	Tb927.8.6450	ICP	inhibitor of cysteine peptidase (ICP)	13.454	18.2	0	6.4812	1		1.5077	0.178315				0	0	0	NaN	NaN		NaN	0	8.3	1	1	1.3299	1.5077	0.178315	NaN	1	9.9	1	1	NaN	NaN		NaN	0
	1508	Tb927.5.2590	Tb927.5.2590		hypothetical protein, conserved	29.106	18.1	0	20.401	1	1	0.841813	-0.0747844	0.742638	0.129223		6.8	1	1	0.473238	0.558036	-0.253338	NaN	1	9.8	2	2	1.0419	1.1807	0.0721396	21.307	2	15.1	3	3	0.82486	0.90541	-0.0431547	9.1378	3
	1329	Tb927.3.5350	Tb927.3.5350		hypothetical protein, conserved	11.599	18.1	0	5.524	1		0.974848	-0.0110631	0.607767	0.216263		18.1	1	1	0.796432	0.943485	-0.0252649	NaN	1	18.1	1	1	0.99167	1.1381	0.0561804	NaN	1	18.1	1	1	0.7795	0.86277	-0.064105	NaN	1
	1469	Tb927.5.1090	Tb927.5.1090	ThrRS	threonyl-tRNA synthetase, putative	90.983	18.1	0	41.454	1	1	1.0021	0.000911458	0.450683	0.346128		7.3	5	5	0.83654	0.972573	-0.0120776	15.888	4	8.6	6	6	0.89765	1.0159	0.00685096	42.444	7	12.4	8	8	0.95428	1.0185	0.00796103	14.928	8
	948	Tb927.11.3460	Tb927.11.3460		hypothetical protein, conserved	32.116	18.1	0	14.15	1		0.985069	-0.00653341	0.641424	0.192855		14.8	3	3	0.832639	0.968054	-0.0141003	7.5089	5	14.8	3	3	0.93627	1.0558	0.0235817	8.1551	5	18.1	4	4	0.87458	0.93523	-0.0290816	23.525	5
	1935	Tb927.8.2280;Tb927.8.2260	Tb927.8.2280;Tb927.8.2260		hypothetical protein, conserved;hypothetical protein, conserved	21.768	18.1	0.0014012	2.3478	2			NaN				14.6	1	0	NaN	NaN		NaN	0	0	0	0	NaN	NaN		NaN	0	3.5	1	1	NaN	NaN		NaN	0
	2056	Tb927.8.6560	Tb927.8.6560		hypothetical protein, conserved	40.167	18	0	25.202	1	1	0.992099	-0.00344502	0.549934	0.259689		14.2	3	3	0.757404	0.893416	-0.0489465	17.713	3	15.3	3	3	0.95444	1.0813	0.0339462	115.58	3	8.3	1	1	0.93347	1.0108	0.00466523	NaN	1
	621	Tb927.10.7700	Tb927.10.7700		ABC transporter, putative	75.051	18	0	34.382	1		0.954962	-0.020014	0.819252	0.0865827		14.4	7	7	0.773694	0.921404	-0.0355498	19.149	9	13	6	6	0.81597	0.91506	-0.0385504	16.542	9	13	7	7	0.95392	1.0329	0.0140583	11.864	9
	438	Tb927.10.15710	Tb927.10.15710	MCP7	mitochondrial carrier protein (MCP7)	35.875	18	0	7.6624	1	1	1.02708	0.0116059	0.343113	0.464563		11.5	3	3	0.942951	1.12718	0.0519933	23.782	3	9.9	3	3	0.91934	1.0386	0.0164483	12.816	3	9	2	2	0.8496	0.9255	-0.0336236	13.003	2
	2330	Tb927.9.9710	Tb927.9.9710		hypothetical protein, conserved	36.786	17.9	0	23.74	1		1.05902	0.0249054	0.299495	0.52361		7.2	2	2	1.0597	1.26799	0.103116	36.76	2	10.7	3	3	0.83037	0.93204	-0.0305654	11.094	4	14.3	4	4	0.92714	1.005	0.00216606	3.9503	4
	837	Tb927.11.15240	Tb927.11.15240	RAB2	small GTPase, putative,ras-related protein rab-2a, putative (RAB2)	23.511	17.9	0	14.42	1		0.794455	-0.0999306	0.764067	0.116869		0	0	0	NaN	NaN		NaN	0	12.7	2	2	0.57658	0.64358	-0.191397	42.869	2	11.3	2	2	0.90832	0.9807	-0.00846382	22.494	2
	1705	Tb927.6.850;Tb11.v5.0689	Tb927.6.850;Tb11.v5.0689	NOT2	ccr4-not transcription complex subunit 2;hypothetical protein, conserved	37.396	17.9	0	21.714	2		1.00541	0.00234437	0.456053	0.340984		17.9	4	4	0.779302	0.924727	-0.0339864	20.187	4	11.8	2	2	0.95137	1.0686	0.0288152	4.2693	2	17.9	4	4	0.94898	1.0285	0.0122043	17.666	4
	396	Tb927.10.14090	Tb927.10.14090		transporter, putative	56.529	17.9	0	17.481	1		0.968073	-0.0140919	0.854782	0.0681447		12.4	4	4	0.778089	0.928333	-0.0322964	7.1359	5	14.8	6	6	0.86481	0.97339	-0.0117131	6.6082	7	9.1	3	3	0.92511	1.004	0.00173371	4.4217	3
	1362	Tb927.4.1420	Tb927.4.1420		hypothetical protein, conserved	15.664	17.9	0	7.1675	1	1	0.941416	-0.0262184	0.90911	0.0413836		10.4	1	1	0.815328	0.972384	-0.0121621	NaN	1	10.4	2	2	0.77695	0.88666	-0.0522429	17.17	3	17.9	2	2	0.88773	0.96772	-0.0142503	9.5113	2
	1405	Tb927.4.330	Tb927.4.330		hypothetical protein, conserved	43.016	17.9	0	9.0574	1	1	0.956439	-0.0193425	0.776355	0.10994		4	1	1	0.876732	1.04853	0.0205792	NaN	1	14.5	3	3	0.79478	0.89479	-0.0482789	19.859	3	7.4	2	2	0.85927	0.93255	-0.0303279	2.4509	2
	891	Tb927.11.16970	Tb927.11.16970		protein phosphatase 4, putative	34.432	17.8	0	9.9092	1		0.976362	-0.0103889	0.812782	0.0900262		8.6	2	2	0.831393	0.992063	-0.00346053	15.651	2	0	0	0	NaN	NaN		NaN	0	17.8	4	4	0.87964	0.96091	-0.0173173	72.309	4
	2067	Tb927.8.6970	Tb927.8.6970		3-methylcrotonyl-CoA carboxylase alpha subunit, putative	73.906	17.7	0	25.108	1	1	1.09971	0.0412767	0.284659	0.545675		6	3	0	NaN	NaN		NaN	0	11.5	5	1	0.86452	0.97694	-0.0101321	NaN	1	15.5	6	3	1.1532	1.2379	0.0926856	22.192	3
	508	Tb927.10.3560	Tb927.10.3560		arginine N-methyltransferase, putative	42.121	17.7	0	37.328	1		0.972584	-0.0120728	0.601622	0.220676		12.3	4	4	0.681896	0.809258	-0.0919131	14.315	4	14.9	5	5	0.90637	1.025	0.0107239	14.567	5	12.6	4	4	1.0293	1.1091	0.0449707	22.217	4
	2204	Tb927.9.1710	Tb927.9.1710		hypothetical protein, conserved	52.951	17.6	0	20.956	1		0.938654	-0.0274945	0.592129	0.227583		0	0	0	NaN	NaN		NaN	0	12.5	4	4	1.0391	1.161	0.0648322	13.519	4	14.8	5	5	0.70033	0.75889	-0.119821	41.91	5
	1322	Tb927.3.5050	Tb927.3.5050		60S ribosomal protein L4	41.856	17.6	0	26.12	1		1.02849	0.0122001	0.345271	0.46184		14.4	3	3	0.965624	1.16202	0.0652136	12.921	3	14.4	3	3	0.8571	0.96638	-0.0148521	10.802	3	7.5	2	2	0.90074	0.96881	-0.0137614	NaN	1
	940	Tb927.11.3240	Tb927.11.3240	TCP-1-zeta	T-complex protein 1, zeta subunit, putative (TCP-1-zeta)	59.579	17.6	0	24.823	1		0.955638	-0.0197065	0.918449	0.0369451		14	5	5	0.795229	0.935716	-0.0288558	13.405	6	12.1	4	4	0.83863	0.93587	-0.0287845	5.7369	6	14	5	5	0.93335	0.9966	-0.00147912	14.581	6
	2334	Tb927.9.9860	Tb927.9.9860		hypothetical protein, conserved	79.857	17.6	0	58.307	1		1.03303	0.0141111	0.261211	0.583009		14.4	9	9	0.953016	1.12411	0.05081	16.554	9	10.7	5	5	0.87549	0.98832	-0.00510242	5.4346	4	13.6	8	8	0.92119	0.99226	-0.00337452	6.3733	8
	1714	Tb927.7.1140	Tb927.7.1140	TDPX3	trypanothione/tryparedoxin dependent peroxidase 3,glutathione peroxidase-like protein 3 (TDPX3)	19.655	17.6	0	9.7318	1	1	0.983957	-0.00702386	0.863381	0.0637977		17.6	3	1	0.821018	0.988435	-0.00505175	NaN	1	5.1	1	1	0.85379	0.96392	-0.015959	NaN	1	17.6	3	1	0.92433	0.99986	-6.08055e-05	NaN	1
	733	Tb927.11.11620	Tb927.11.11620		hypothetical protein, conserved	27.683	17.6	0	6.4331	1	1	0.995144	-0.002114	0.569135	0.244785		7.6	2	2	0.856604	1.03092	0.0132237	NaN	1	8.4	2	2	0.89389	1.0073	0.00315883	4.8713	2	8.4	2	2	0.88133	0.94902	-0.0227246	0.3444	2
	2048	Tb927.8.6410	Tb927.8.6410		short-chain dehydrogenase, putative	52.913	17.5	0	58.387	1	1	1.04486	0.0190567	0.29519	0.529899		9.9	3	3	0.819068	0.97371	-0.0115704	23.474	3	11.6	4	4	1.063	1.1997	0.0790727	10.386	5	15.4	5	5	0.90031	0.97649	-0.0103322	9.8382	5
	1088	Tb927.11.860	Tb927.11.860		leucine-rich repeat protein (LRRP), putative	106.7	17.5	0	79.799	1		0.983471	-0.00723829	0.58836	0.230357		11.5	8	8	0.768403	0.89063	-0.0503024	22.765	7	12	8	8	0.8573	0.95926	-0.0180637	22.841	8	13	9	9	1.04	1.1134	0.0466512	18.057	9
	1089	Tb927.11.870	Tb927.11.870		hypothetical protein, conserved	28.776	17.5	0	17.407	1	1	0.944259	-0.0249091	0.801454	0.0961216		11	2	2	0.72685	0.864304	-0.0633333	10.551	2	4.9	1	1	0.9211	1.0403	0.0171586	NaN	1	17.5	4	4	0.86639	0.93637	-0.0285525	14.908	4
	1221	Tb927.3.1590	Tb927.3.1590	MRB1590	mitochondrial RNA binding complex 1 subunit (MRB1590)	72.678	17.5	0	63.6	1		0.960896	-0.0173236	0.83414	0.0787609		12.6	6	6	0.785916	0.92885	-0.0320544	20.628	6	11.5	5	5	0.89433	1.0231	0.00991808	19.423	6	13.5	6	6	0.85881	0.93361	-0.0298345	32.215	6
	650	Tb927.10.8950;Tb927.10.8970	Tb927.10.8950;Tb927.10.8970		kinetoplast DNA-associated protein, putative;kinetoplast DNA-associated protein, putative	14.183	17.5	0	14.409	2	1	0.964446	-0.0157221	0.668062	0.175183		10.3	2	2	0.860215	0.928936	-0.0320141	7.4204	3	10.3	2	2	0.88856	1.1079	0.0445006	4.9056	4	16.7	2	2	0.79718	0.87166	-0.0596529	19.722	2
	380	Tb927.10.13620	Tb927.10.13620		NADH-ubiquinone oxidoreductase complex I subunit,FT putative	54.791	17.5	0	16.487	1	1	1.02452	0.0105219	0.111259	0.953663		9.1	3	3	0.885661	1.05326	0.0225372	3.4083	3	11.8	4	4	0.89352	1.0119	0.0051376	15.181	4	15.3	5	5	0.93134	1.009	0.00389117	14.482	5
	579	Tb927.10.6020	Tb927.10.6020		hypothetical protein, conserved	18.564	17.4	0	8.3663	1		1.07557	0.0316394	0.341434	0.466693		10.7	1	1	0.678104	0.806192	-0.0935617	NaN	1	17.4	2	2	0.99896	1.1307	0.0533474	17.567	2	10.7	1	1	1.2257	1.365	0.135133	NaN	1
	919	Tb927.11.2530	Tb927.11.2530		kinteoplast poly(A) polymerase complex 1 subunit,mitochondrial edited mRNA stability factor 1 subunit,mitochondrial RNA binding complex 1 subunit	84.864	17.4	0	36.21	1	1	0.884223	-0.0534382	0.843973	0.0736713		4.1	3	3	0.884877	1.0435	0.0184941	33.869	3	12.6	7	7	0.771	0.87171	-0.059628	6.8925	7	6.2	4	4	0.71188	0.76001	-0.119181	31.51	3
	1331	Tb927.3.5430	Tb927.3.5430		hypothetical protein, conserved	31.212	17.3	0	13.258	1		1.01397	0.00602587	0.271626	0.566028		12.2	3	3	0.821558	0.977422	-0.00991811	8.5057	4	14	3	3	0.89667	1.0233	0.010003	18.936	3	8.9	2	2	0.95249	1.0423	0.0179927	8.4789	3
	113	Tb11.02.5390b;Tb11.02.5390	Tb11.02.5390b;Tb11.02.5390		mRNA processing protein, putative;mRNA processing protein, putative	120.71	17.3	0	119.11	2	1	0.984317	-0.00686515	0.636859	0.195957		11.9	9	9	0.885112	1.06429	0.0270616	57.575	10	4.9	4	4	0.85178	0.9534	-0.0207249	10.239	3	13.5	12	12	0.87145	0.93987	-0.0269322	12.249	13
	2014	Tb927.8.5540	Tb927.8.5540	Isa1	hypothetical protein, conserved	29.536	17.3	0	21.516	1	1	0.958946	-0.0182058	0.807857	0.0926654		12.5	2	2	0.861252	1.02869	0.0122845	15.825	2	4	1	1	0.83889	0.94922	-0.0226331	NaN	1	17.3	4	4	0.83015	0.90309	-0.044269	7.2919	5
	1822	Tb927.7.4880	Tb927.7.4880		hypothetical protein, conserved	23.311	17.2	0	11.947	1		1.06175	0.0260207	0.429212	0.367328		9.3	1	1	0.499301	0.587233	-0.231189	NaN	1	17.2	2	2	1.2482	1.408	0.148603	23.672	5	9.3	1	1	1.3706	1.4476	0.160649	NaN	1
	2290	Tb927.9.7260	Tb927.9.7260		hypothetical protein, conserved	41.248	17.2	0	12.434	1	1	1.08367	0.0348954	0.354914	0.449877		7.7	2	2	1.16301	1.39109	0.143356	37.511	2	8.5	2	2	0.66427	0.75089	-0.124424	26.424	3	12.3	3	3	1.1377	1.2183	0.0857542	33.681	3
	586	Tb927.10.6360	Tb927.10.6360		hypothetical protein, conserved	55.524	17.2	0	45.572	1		1.0048	0.0020814	0.467116	0.330576		15.6	4	4	0.812678	0.969556	-0.0134271	17.415	5	11.5	3	3	0.9837	1.112	0.0461048	6.7153	3	17.2	5	5	0.87921	0.94095	-0.0264335	17.332	5
	2012	Tb927.8.5510	Tb927.8.5510		apurinic/apyrimidinic endonuclease, putative	44.375	17.2	0	43.52	1		1.02942	0.012592	0.251051	0.600237		7.1	2	2	0.865576	1.02828	0.0121105	8.0082	2	9.6	3	3	0.86862	0.96822	-0.014026	8.4792	3	17.2	5	5	0.98125	1.0957	0.0396917	29.123	5
	1877	Tb927.7.7130	Tb927.7.7130		hypothetical protein, conserved	92.781	17.2	0	89.982	1		0.960993	-0.0172799	0.879951	0.0555417		10.5	5	5	0.772917	0.915835	-0.0381829	20.31	6	14.1	7	7	0.87696	0.98391	-0.00704463	34.365	7	13.7	7	7	0.90245	0.98489	-0.00661227	10.984	7
	2108	Tb927.9.10470	Tb927.9.10470		hypothetical protein, conserved	46.829	17.2	0	19.785	1	1	0.998427	-0.000683775	0.572899	0.241922		9.9	4	4	0.860659	1.01238	0.00534399	16.442	4	14.8	4	4	0.87922	0.99666	-0.00145297	7.2813	4	5.2	2	2	0.9122	0.98641	-0.00594253	1.2346	2
	432	Tb927.10.15490	Tb927.10.15490		GDP-mannose 4,6 dehydratase, putative	40.548	17.1	0	20.134	1	1	1.09488	0.0393647	0.270763	0.567411		17.1	4	4	1.14252	1.36413	0.134854	15.603	4	17.1	4	4	0.78542	0.88734	-0.0519099	17.365	5	12.7	3	3	1.0193	1.0843	0.0351495	19.276	3
	1820	Tb927.7.4760;Tb11.v5.0159	Tb927.7.4760;Tb11.v5.0159		hypothetical protein, conserved;hypothetical protein, conserved	58.815	17.1	0	17.714	2		1.01416	0.00610598	0.466247	0.331384		12.1	4	4	1.08167	1.30359	0.115142	28.607	3	17.1	6	6	0.90141	1.021	0.00902574	34.516	7	5.4	2	2	0.72873	0.7837	-0.10585	41.049	2
	1087	Tb927.11.8450	Tb927.11.8450		hypothetical protein, conserved	32.251	17.1	0	9.2413	1		1.01364	0.0058818	0.37034	0.431399		9	2	2	0.792644	0.943931	-0.0250599	11.764	2	17.1	3	3	0.93511	1.0536	0.0226758	8.1532	3	6	1	1	0.97376	1.0472	0.0200296	NaN	1
	114	Tb11.02.5400b;Tb11.02.5400	Tb11.02.5400b;Tb11.02.5400		cystathionine beta-synthase, putative;cystathionine beta-synthase, putative	39.464	17.1	0	11.138	2	1	0.955546	-0.0197485	0.660096	0.180393		7.2	1	1	0.835981	0.991277	-0.0038051	NaN	1	12.2	2	2	0.97878	1.1028	0.0424968	16.617	2	12.2	2	2	0.75236	0.79811	-0.0979372	28.967	3
	1729	Tb927.7.1680	Tb927.7.1680		hypothetical protein, conserved	36.328	17.1	0	11.736	1		0.970323	-0.0130838	0.746857	0.126763		9.3	3	3	0.851209	1.00755	0.00326531	9.4926	3	9	3	3	0.80831	0.90017	-0.0456755	16.682	3	11.8	4	4	0.92751	1.0073	0.00315883	5.1017	4
	548	Tb927.10.4880	Tb927.10.4880		hypothetical protein, conserved	25.965	17	0	9.7445	1	1	1.14257	0.0578827	0.104616	0.980404		0	0	0	NaN	NaN		NaN	0	13.4	2	2	1.0564	1.1957	0.0776222	NaN	1	17	3	3	1.0122	1.0918	0.0381431	10.851	2
	660	Tb927.10.9260	Tb927.10.9260		hypothetical protein, conserved	35.617	17	0	50.977	1		1.00691	0.00299202	0.445922	0.350741		13	2	2	0.774953	0.92081	-0.0358298	10.177	3	13	2	2	0.94436	1.0579	0.0244446	3.1855	3	9.3	2	2	0.96639	1.048	0.0203613	12.94	3
	1747	Tb927.7.2300	Tb927.7.2300	TbNup132	Nucleoporin (TbNup132)	132.36	17	0	48.031	1		1.01308	0.00564347	0.338483	0.470463		13.1	12	12	0.809389	0.972952	-0.0119086	14.354	12	8.3	8	8	0.88712	1.0024	0.00104106	22.168	9	12.6	13	13	0.98358	1.0661	0.0277979	26.376	14
	1847	Tb927.7.5840	Tb927.7.5840		hypothetical protein, conserved	26.164	17	0	19.582	1		0.994156	-0.00254538	0.550723	0.259067		13.5	3	3	0.895736	1.07562	0.0316573	10.464	3	14	4	4	0.83759	0.93926	-0.0272142	55.462	4	16.6	4	4	0.89795	0.97257	-0.0120791	11.355	3
	1585	Tb927.6.1550	Tb927.6.1550		leucine-rich repeat protein (LRRP), putative	38.864	17	0	102.12	1		1.03052	0.0130582	0.278224	0.555605		4.8	1	1	0.931532	1.12012	0.0492653	14.218	2	4.8	1	1	0.89688	1.0064	0.00277063	2.1818	2	17	4	4	0.89686	0.97082	-0.0128613	7.4542	6
	1991	Tb927.8.4610	Tb927.8.4610	RABX1	small GTP-binding protein Rab1 (Trab1)	24.018	17	0	5.8385	1		0.60171	-0.220613				5	1	0	NaN	NaN		NaN	0	5	1	0	NaN	NaN		NaN	0	17	3	2	0.5553	0.60171	-0.220613	164.69	2
	1229	Tb927.3.1760	Tb927.3.1760		chaperone protein DNAj, putative	29.423	16.9	0	8.4179	1	1	0.973614	-0.0116134	0.545771	0.26299		0	0	0	NaN	NaN		NaN	0	12.7	3	3	1.0365	1.1711	0.068594	7.249	3	4.2	1	1	0.74684	0.80943	-0.0918207	NaN	1
	1344	Tb927.3.790	Tb927.3.790	ZC3H6	ZFP family member, putative (ZC3H6)	38.651	16.9	0	11.417	1		0.991997	-0.00348979	0.543937	0.264451		3.7	1	1	0.73828	0.874126	-0.0584261	NaN	1	12.1	2	2	0.92123	1.0347	0.0148144	45.058	2	8.4	2	2	1.0029	1.0793	0.0331422	NaN	1
	1683	Tb927.6.4920;Tb927.6.4910;Tb927.6.4900;Tb927.6.4880;Tb927.6.4860;Tb927.6.4850;Tb927.6.4840;Tb927.6.4890;Tb927.6.4870	Tb927.6.4920;Tb927.6.4910;Tb927.6.4900;Tb927.6.4880;Tb927.6.4860;Tb927.6.4850;Tb927.6.4840;Tb927.6.4890;Tb927.6.4870	METK1;METK1;METK1;METK1;METK1;METK1;METK1;METK1;METK1	S-adenosylmethionine synthetase, putative (METK1);S-adenosylmethionine synthetase, putative (METK1);S-adenosylmethionine synthetase, putative (METK1);S-adenosylmethionine synthetase, putative (METK1);S-adenosylmethionine synthetase, putative (METK1);S	43.54	16.9	0	10.14	9		0.957696	-0.0187722	0.758214	0.120208		6.8	2	2	0.750525	0.896459	-0.0474696	22.92	2	11.8	3	3	0.94837	1.058	0.0244857	10.068	3	11.8	4	4	0.83284	0.92612	-0.0333327	13.592	4
	1337	Tb927.3.5610	Tb927.3.5610		ribosomal protein L3 mitochondrial, putative	54.986	16.9	0	62.313	1	1	0.982036	-0.00787242	0.621015	0.206898		12.9	4	4	0.807428	0.957304	-0.01895	7.5463	5	11	3	3	0.96193	1.0842	0.0351094	7.4501	3	13.7	4	4	0.84005	0.91248	-0.0397766	5.2349	5
	593	Tb927.10.6730;Tb927.10.6720;Tb11.v5.0578;Tb927.10.6740;Tb927.10.6750;Tb927.10.6760	Tb927.10.6730;Tb927.10.6720;Tb11.v5.0578;Tb927.10.6740		hypothetical protein, conserved;hypothetical protein, conserved;hypothetical protein, conserved;hypothetical protein, conserved	53.553	16.9	0	56.59	6		0.974333	-0.0112925	0.83116	0.0803151		7.8	4	4	0.781555	0.937471	-0.0280423	53.168	4	11.8	5	5	0.87303	1.0068	0.00294321	21.864	5	16.5	6	6	0.92562	0.97999	-0.00877836	51.898	6
	634	Tb927.10.8210	Tb927.10.8210	KREPA2	KREPA2 (KREPA2)	62.912	16.9	0	30.892	1	1	0.949564	-0.0224756	0.697431	0.156499		11.2	2	2	0.915667	1.09589	0.039767	27.412	2	10.9	2	2	0.84638	0.95718	-0.0190064	13.04	2	12.8	3	3	0.755	0.81623	-0.0881874	8.6011	2
	1984	Tb927.8.4250	Tb927.8.4250		hypothetical protein, conserved	47.403	16.8	0	22.552	1	1	1.59688	0.203274	0.223228	0.651251		5.4	1	1	3.65764	4.3057	0.634044	NaN	1	10.7	3	3	0.79432	0.9002	-0.045661	20.753	3	14.6	5	5	0.97386	1.0506	0.0214374	19.481	5
	1713	Tb927.7.1110	Tb927.7.1110		asparagine synthetase a, putative	39.597	16.8	0	8.2807	1		1.16195	0.0651891	0.281949	0.54983		0	0	0	NaN	NaN		NaN	0	10.5	2	2	0.85935	0.96694	-0.0146005	39.497	2	6.3	2	2	1.2953	1.3963	0.144979	16.803	2
	787	Tb927.11.13620	Tb927.11.13620		hypothetical protein, conserved	15.326	16.8	0	6.5611	1	1	0.895302	-0.0480303	0.600547	0.221453		9.8	1	1	1.45089	1.74183	0.241005	NaN	1	16.8	2	2	0.77758	0.88497	-0.0530715	37.294	2	9.8	1	1	0.43626	0.46556	-0.332024	NaN	1
	1379	Tb927.4.2180	Tb927.4.2180		60S ribosomal protein L35a, putative	17.021	16.8	0	4.6877	1		0.84385	-0.0737349	0.808348	0.0924015		8.7	1	1	0.627549	0.75092	-0.124406	NaN	1	0	0	0	NaN	NaN		NaN	0	16.8	2	2	0.87517	0.94828	-0.0230634	4.5268	2
	535	Tb927.10.4220	Tb927.10.4220		hypothetical protein, conserved	34.243	16.8	0	11.81	1	1	0.975211	-0.0109014	0.606405	0.217237		8.4	2	2	0.690322	0.828775	-0.0815633	28.971	3	13.3	3	3	0.95674	1.0667	0.0280423	37.55	3	12	3	3	0.96647	1.0491	0.0208169	6.2011	4
	1795	Tb927.7.3810	Tb927.7.3810		hypothetical protein, conserved	41.685	16.8	0	35.914	1	1	1.02293	0.00984521	0.25668	0.590609		11	3	3	0.828157	0.981643	-0.00804629	4.2834	2	14.7	4	4	0.89704	1.0085	0.0036759	7.2547	3	16.8	5	5	0.99607	1.0812	0.033906	15.115	5
	225	Tb927.11.1780;Tb11.v5.0991	Tb927.11.1780;Tb11.v5.0991		protein phosphatase 2C, putative;protein phosphatase 2C, putative	36.559	16.8	0	13.637	2	1	1.05852	0.024699	0.0911459	1.04026		16.8	4	4	0.918442	1.09268	0.0384934	15.94	4	14.7	3	3	0.86693	1.0004	0.000173683	12.771	3	10.2	3	3	0.98543	1.085	0.0354297	34.04	3
	780	Tb927.11.13510	Tb927.11.13510		hypothetical protein, conserved	20.104	16.7	0	20.338	1	1	1.13802	0.0561481	0.190699	0.719652		16.7	2	2	1.16801	1.40578	0.147917	34.435	2	16.7	2	2	0.98983	1.113	0.0464952	24.397	2	16.7	2	2	0.87533	0.94196	-0.0259675	1.4288	2
	1495	Tb927.5.1930	Tb927.5.1930		hypothetical protein, conserved	24.188	16.7	0	21.036	1		0.944738	-0.0246886	0.709985	0.148751		12.6	2	2	0.682547	0.818398	-0.0870357	7.0818	3	12.6	2	2	0.82809	0.93258	-0.0303139	14.036	2	16.7	3	3	1.0284	1.1048	0.0432837	10.797	4
	598	Tb927.10.6870	Tb927.10.6870		short-chain dehydrogenase, putative	40.178	16.7	0	5.6365	1		0.882331	-0.0543686	0.825943	0.0830499		3.8	1	1	0.605473	0.718236	-0.143733	NaN	1	7.7	2	2	0.87391	0.98525	-0.00645356	0.45525	2	12.9	3	3	0.89223	0.97069	-0.0129194	7.1371	2
	150	Tb927.11.7250;Tb11.v5.0257	Tb927.11.7250;Tb11.v5.0257		hypothetical protein, conserved;hypothetical protein, conserved	53.363	16.5	0	30.79	2	1	1.05178	0.0219258	0.323542	0.49007		11.3	4	4	1.05045	1.24721	0.0959392	24.451	4	14.1	4	4	0.79671	0.89936	-0.0460664	26.926	4	8.9	3	3	0.97353	1.0373	0.0159044	11.475	3
	675	Tb927.10.9910	Tb927.10.9910		hypothetical protein, conserved	48.986	16.5	0	32.623	1		0.924587	-0.0340521	0.66432	0.177623		12.2	3	3	0.785484	0.930925	-0.0310852	16.063	3	9.1	2	2	0.62088	0.69926	-0.155361	35.168	2	12.2	3	3	1.1099	1.2142	0.0842902	17.481	3
	355	Tb927.10.12710	Tb927.10.12710		heat shock protein 110, putative	90.863	16.5	0	34.806	1		0.985905	-0.00616506	0.577101	0.238748		5.5	4	4	0.768935	0.904323	-0.0436766	15.146	4	12.3	9	9	0.85027	0.94785	-0.0232604	22.713	7	6.7	5	5	1.0473	1.118	0.0484418	26.765	5
	1860	Tb927.7.6350	Tb927.7.6350		NADH-ubiquinone oxidoreductase, mitochondrial, putative	30.925	16.5	0	17.572	1	1	1.02531	0.0108546	0.383651	0.416064		13.9	3	3	0.995718	1.18816	0.0748735	32.644	5	11	2	2	0.84936	0.96049	-0.0175072	4.4185	3	13.6	3	3	0.87404	0.94449	-0.0248026	17.314	7
	1318	Tb927.3.4950	Tb927.3.4950		hypothetical protein, conserved	52.553	16.5	0	19.64	1	1	0.948427	-0.0229959	0.699043	0.155496		5.3	1	1	0.94697	1.12705	0.0519443	NaN	1	8.4	2	2	0.75991	0.87083	-0.0600666	3.8561	2	13.3	4	4	0.78316	0.86923	-0.0608653	64.241	3
	1061	Tb927.11.7200	Tb927.11.7200		hypothetical protein, conserved	69.423	16.5	0	27.25	1		0.962706	-0.0165063	0.81532	0.0886722		12.9	7	7	0.790077	0.927042	-0.0329007	9.4236	7	5.7	3	3	0.83138	0.93597	-0.0287381	9.7183	3	9.5	5	5	0.94858	1.0283	0.0121198	10.527	5
	322	Tb927.10.11350	Tb927.10.11350		hypothetical protein, conserved	16.667	16.5	0	3.667	1	1	0.779312	-0.108289	0.981902	0.00793202		8.3	1	1	0.654664	0.790451	-0.102125	NaN	1	8.3	1	1	0.68129	0.76833	-0.114452	NaN	1	0	0	0	NaN	NaN		NaN	0
	1514	Tb927.5.2950	Tb927.5.2950		hypothetical protein, conserved	88.256	16.4	0	33.371	1		1.10535	0.0435	0.102863	0.987741		14.6	10	10	0.850774	1.0207	0.00889811	30.128	9	6.2	4	4	1.0855	1.2258	0.0884196	9.1946	3	7.8	5	5	0.9734	1.0794	0.0331824	12.572	5
	2200	Tb927.9.1590	Tb927.9.1590		hypothetical protein, conserved	15.734	16.4	0	4.2915	1	1	0.924927	-0.0338925	0.623276	0.205319		9.3	1	1	0.569573	0.669927	-0.173973	NaN	1	9.3	1	1	0.74535	0.84535	-0.0729634	NaN	1	16.4	2	2	1.2833	1.3972	0.145259	1.6942	2
	1960	Tb927.8.3150	Tb927.8.3150	TCP-1-gamma	T-complex protein 1, gamma subunit, putative (TCP-1-gamma)	60.817	16.4	0	33.236	1		1.03596	0.0153435	0.271033	0.566978		16.4	6	6	0.854701	1.0064	0.00277106	10.863	6	12.2	4	4	0.84862	0.97009	-0.013188	12.274	4	16.4	6	6	1.062	1.1388	0.0564475	18.694	6
	652	Tb927.10.900	Tb927.10.900		hypothetical protein, conserved	19.158	16.4	0	6.859	1	1	0.886081	-0.0525265	0.758995	0.119761		16.4	2	2	0.965904	1.1465	0.0593741	NaN	1	9.9	1	1	0.62797	0.70469	-0.152002	NaN	1	9.9	1	1	0.80966	0.86109	-0.0649515	NaN	1
	1958	Tb927.8.3100	Tb927.8.3100	CRN12	coronin, putative (CRN12)	57.312	16.4	0	47.103	1		0.990496	-0.00414719	0.571126	0.243268		14.5	4	4	0.914913	1.08687	0.0361792	6.2594	4	11.9	3	3	0.825	0.93382	-0.0297368	24.329	3	16.4	5	5	0.87941	0.95745	-0.0188839	9.9774	5
	658	Tb927.10.9190	Tb927.10.9190	IleRS	isoleucyl-tRNA synthetase, putative (IleRS)	130.6	16.4	0	51.587	1	1	0.982396	-0.0077133	0.725702	0.139242		8.7	7	7	0.872981	1.03178	0.0135867	18.542	8	11.2	9	9	0.8267	0.9522	-0.0212718	9.1805	9	12.5	10	10	0.90115	0.96504	-0.0154547	15.666	10
	566	Tb927.10.5590	Tb927.10.5590		protein phosphatase 2C, putative	66.75	16.4	0	34.172	1		1.01313	0.00566461	0.344272	0.463099		15.1	7	7	0.89222	1.06795	0.0285525	14.448	6	12.9	6	6	0.85882	0.97005	-0.0132059	10.733	6	14.4	7	7	0.90768	1.0038	0.00164719	19.414	7
	142	Tb927.10.6120;Tb11.v5.0204	Tb927.10.6120;Tb11.v5.0204		hypothetical protein, conserved;hypothetical protein, conserved	27.225	16.3	0	8.9639	2		1.28891	0.110224	0.136141	0.866012		0	0	0	NaN	NaN		NaN	0	11	1	1	1.2862	1.447	0.160469	NaN	1	5.3	1	1	1.0462	1.1481	0.0599797	NaN	1
	2329	Tb927.9.9700	Tb927.9.9700		hypothetical protein, conserved	51.819	16.3	0	29.334	1		1.12974	0.0529767	0.100494	0.997859		16.3	4	4	0.860807	1.02276	0.00977204	9.3755	4	13.5	3	3	0.98708	1.1046	0.043205	18.397	3	13.5	3	3	1.1695	1.2763	0.105953	54.205	3
	1844	Tb927.7.5790	Tb927.7.5790		protein disulfide isomerase, putative	15.401	16.3	0	6.9732	1		1.07466	0.0312731	0.118096	0.927767		7.4	1	1	0.916926	1.09412	0.0390634	NaN	1	16.3	3	3	0.87689	0.9902	-0.00427708	15.836	3	7.4	1	1	1.0544	1.1456	0.059033	NaN	1
	2149	Tb927.9.12700	Tb927.9.12700		phospholipase A1, putative	49.911	16.3	0	46.553	1		1.0123	0.00531001	0.378479	0.421958		16.3	6	6	0.823384	0.979624	-0.00894063	16.761	7	16.3	6	6	0.86032	0.97634	-0.0103989	8.2435	8	13.4	5	5	1.0057	1.0846	0.0352696	6.0629	6
	269	Tb927.1.4490	Tb927.1.4490		acetyltransferase, putative	19.682	16.3	0	16.376	1		1.02994	0.012814	0.0834059	1.0788		12.8	2	2	0.83689	1.00222	0.000965232	8.7674	2	16.3	2	2	0.92061	1.0484	0.020527	3.3294	2	12.8	2	2	0.96585	1.0398	0.0169498	8.0975	2
	470	Tb927.10.2320	Tb927.10.2320		hypothetical protein, conserved	41.178	16.3	0	98.841	1		0.967856	-0.0141891	0.831311	0.0802364		9.4	2	2	0.786225	0.941176	-0.0263289	4.7936	3	5	1	1	0.84477	0.94469	-0.0247107	2.5957	2	16.3	4	4	0.93656	1.0197	0.00847242	13.795	5
	1888	Tb927.7.7500	Tb927.7.7500	TLP7	thymine-7-hydroxylase, putative (TLP7)	36.926	16.2	0	7.2236	1		1.07003	0.0293975	0.167491	0.776009		8.8	2	2	0.853315	0.995818	-0.0018202	10.47	2	7.5	2	2	1.0487	1.1887	0.0750723	9.3416	2	5.6	2	2	0.9502	1.035	0.0149403	6.121	2
	2010	Tb927.8.5420	Tb927.8.5420		hypothetical protein, conserved	46.375	16.2	0	12.64	1	1	0.956588	-0.0192752	0.841098	0.0751533		8.7	2	2	0.766166	0.901307	-0.0451273	20.55	2	11.4	3	3	0.85245	0.9591	-0.0181361	0.66449	3	13.8	4	4	0.93975	1.0126	0.00543792	8.9643	4
	471	Tb927.10.2350	Tb927.10.2350		pyruvate dehydrogenase complex E3 binding protein, putative	27.335	16.2	0	50.125	1	1	0.940974	-0.0264222	0.857406	0.0668135		11.9	2	2	0.731475	0.865127	-0.0629203	5.9808	2	11.9	2	2	0.86203	0.97732	-0.00996321	13.979	3	16.2	3	3	0.90714	0.98541	-0.00638303	6.7753	3
	789	Tb927.11.13710	Tb927.11.13710		hypothetical protein, conserved	20.895	16.2	0	13.693	1	1	0.864418	-0.063276	0.991497	0.0037084		0	0	0	NaN	NaN		NaN	0	16.2	2	2	0.76593	0.86106	-0.0649666	3.1723	2	8.1	1	1	0.81556	0.86779	-0.0615854	NaN	1
	852	Tb927.11.15820	Tb927.11.15820		superoxide dismutase, putative	36.047	16.2	0	81.506	1	1	0.998863	-0.000494076	0.506897	0.295081		11.7	2	2	0.945716	1.12223	0.0500834	14.755	3	11.7	2	2	0.83124	0.93722	-0.0281585	2.7279	4	16.2	3	3	0.8784	0.94753	-0.023407	13.038	4
	2052	Tb927.8.6490	Tb927.8.6490		protein kinase, putative	119.35	16.2	0	46.81	1		0.993402	-0.00287479	0.567696	0.245884		11.2	10	10	0.855432	1.01746	0.00751734	24.195	12	5.8	5	5	0.92222	1.0377	0.0160718	19.472	4	12.7	12	12	0.85781	0.92851	-0.0322134	5.159	12
	288	Tb927.10.10160	Tb927.10.10160		hypothetical protein, conserved	42.907	16.2	0	31.195	1	1	1.02805	0.0120126	0.248774	0.604196		7.5	2	2	0.899604	1.07521	0.0314937	15.098	2	10.3	3	3	0.92754	1.0499	0.0211479	1.6891	3	13.4	4	4	0.8865	0.96249	-0.0166038	10.751	4
	1450	Tb927.4.5130	Tb927.4.5130		hypothetical protein, conserved	28.811	16.2	0	44.001	1		0.999561	-0.000190706	0.508683	0.293553		16.2	6	6	0.870928	0.996413	-0.00156066	17.31	7	12.5	3	3	0.85041	1.0325	0.0138901	11.47	3	10.6	3	3	0.89602	0.97073	-0.0129015	18.51	3
	252	Tb927.1.2750	Tb927.1.2750		hypothetical protein, conserved	18.698	16.1	0	5.2164	1		1.11773	0.0483361	0.434198	0.362312		9.5	1	1	1.62456	1.90027	0.278816	NaN	1	0	0	0	NaN	NaN		NaN	0	16.1	2	2	0.61611	0.65744	-0.182144	NaN	1
	1767	Tb927.7.3040	Tb927.7.3040		hypothetical protein, conserved	69.073	16.1	0	31.592	1		1.02989	0.0127925	0.288002	0.540604		11.2	5	5	0.801796	0.948767	-0.0228406	5.0518	6	7.6	3	3	0.9262	1.0415	0.0176593	35.464	5	16.1	8	8	1.0232	1.1055	0.0435587	18.859	8
	491	Tb927.10.2940	Tb927.10.2940		hypothetical protein, conserved	38.468	16.1	0	20.951	1		0.960621	-0.0174478	0.65968	0.180666		9.3	2	2	0.687616	0.813471	-0.0896579	1.1172	2	6.2	1	1	0.89553	1.019	0.00817418	NaN	1	16.1	4	4	0.98158	1.0694	0.0291402	20.175	4
	1530	Tb927.5.3450	Tb927.5.3450		hypothetical protein, conserved	57.992	16.1	0	37.249	1		0.895262	-0.0480499	0.757781	0.120456		9.7	4	4	0.810504	0.957213	-0.0189916	25.978	4	9.5	3	3	0.61975	0.69648	-0.157091	140.96	3	12	4	4	1.004	1.0763	0.0319333	21.227	4
	1797	Tb927.7.3910	Tb927.7.3910		hypothetical protein, conserved	57.602	16.1	0	21.599	1	1	0.954597	-0.0201799	0.692613	0.159509		13.1	5	5	0.898553	1.07615	0.031872	5.3246	5	10.9	4	4	0.73367	0.82302	-0.0845896	23.697	4	10.9	4	4	0.90637	0.98215	-0.00782218	6.3974	4
	1975	Tb927.8.3750	Tb927.8.3750	NOP56	nucleolar protein, putative	54.358	16.1	0	22.616	1		0.937163	-0.0281849	0.850504	0.0703235		16.1	5	5	0.770951	0.897424	-0.0470021	18.629	5	10.6	3	3	0.7863	0.89149	-0.0498835	35.878	3	12.2	4	4	0.94571	1.0288	0.012331	12.548	4
	871	Tb927.11.16380	Tb927.11.16380		hypothetical protein, conserved	23.331	16.1	0	79.596	1		1.01745	0.00751499	0.074092	1.13023		16.1	2	2	0.840054	1.00244	0.00105665	5.2157	3	8.5	1	1	0.90589	1.023	0.00987563	9.1123	2	16.1	2	2	0.95071	1.0271	0.0116127	1.2387	4
	1937	Tb927.8.2400	Tb927.8.2400		hypothetical protein, conserved	30.353	16.1	0	9.5379	1	1	0.887463	-0.05185	0.963932	0.0159538		6.9	1	1	0.731529	0.863856	-0.0635585	NaN	1	11.9	2	2	0.84189	0.94935	-0.0225736	11.137	2	11.1	2	2	0.78679	0.85228	-0.0694177	6.565	2
	1699	Tb927.6.600	Tb927.6.600	CAF1	CCR4 associated factor, putative (CAF1)	38.863	16	0	38.173	1		1.08357	0.0348569	0.279793	0.553163		16	4	4	0.730034	0.873744	-0.0586158	12.592	5	8.5	2	2	1.15	1.2988	0.113542	16.245	3	16	4	4	1.044	1.1211	0.0496444	13.634	6
	398	Tb927.10.14140;Tb11.v5.0605	Tb927.10.14140;Tb11.v5.0605	PYK1	pyruvate kinase 1 (PYK1);pyruvate kinase 1, putative	54.423	16	0	27.609	2		1.01424	0.00614013	0.43612	0.360394		8.8	3	3	0.775374	0.901713	-0.0449315	29.933	3	13.8	4	4	0.86631	0.98531	-0.00642711	8.4615	4	10	3	3	1.103	1.1743	0.0697791	10.462	4
	1951	Tb927.8.2830	Tb927.8.2830		hypothetical protein, conserved	26.237	16	0	4.2122	1		1.00266	0.001154	0.493563	0.306657		11.8	2	2	0.971534	1.14345	0.0582153	23.07	2	0	0	0	NaN	NaN		NaN	0	4.2	1	1	0.80553	0.87921	-0.0559074	NaN	1
	1546	Tb927.5.3980	Tb927.5.3980		hypothetical protein, conserved	43.71	16	0	12.061	1	1	0.944753	-0.0246818	0.739113	0.131289		9.1	3	3	0.74085	0.889917	-0.0506504	10.446	3	7.2	2	2	0.76406	0.86606	-0.062452	31.021	2	16	5	5	1.017	1.0941	0.039057	12.398	4
	1301	Tb927.3.4490	Tb927.3.4490		protein farnesyltransferase alpha subunit, putative	70.347	16	0	53.258	1		0.950875	-0.0218766	0.956241	0.0194328		11.9	5	5	0.777182	0.921489	-0.0355098	11.389	7	14.2	6	6	0.86845	0.97086	-0.0128434	19.121	10	11.9	5	5	0.90481	0.961	-0.0172766	5.4025	9
	673	Tb927.10.9890;Tb11.v5.0458	Tb927.10.9890		hypothetical protein, conserved	97.192	16	0	89.089	2		0.949809	-0.0223638	0.989405	0.00462574		11.4	7	7	0.795925	0.943752	-0.025142	13.692	6	11.4	9	9	0.84191	0.94151	-0.0261751	9.0147	9	9.4	5	5	0.89752	0.96433	-0.0157743	12.407	5
	2281	Tb927.9.7020	Tb927.9.7020		hypothetical protein, conserved	24.783	16	0	3.5747	1		0.894888	-0.0482311	0.920262	0.0360887		5.8	1	1	0.796115	0.949397	-0.0225521	NaN	1	16	3	3	0.71991	0.80914	-0.0919763	19.703	3	5.8	1	1	0.8387	0.9329	-0.0301649	NaN	1
	1775	Tb927.7.3200	Tb927.7.3200		hypothetical protein, conserved	40.195	15.8	0	10.687	1	1	1.15491	0.0625476	0.130697	0.883733		15.8	4	4	0.850919	1.01522	0.00655931	11.38	4	12.4	3	3	1.2232	1.3833	0.140916	100.74	3	7.6	2	2	1.0107	1.0969	0.040167	34.119	3
	1748	Tb927.7.2340;Tb927.7.2370	Tb927.7.2340;Tb927.7.2370		40S ribosomal protein S15, putative;40S ribosomal protein S15, putative	17.474	15.8	0	6.7561	2		1.02027	0.0087154	0.408799	0.38849		10.5	1	1	0.826993	0.984931	-0.00659441	NaN	1	10.5	1	1	1.0594	1.1813	0.0723602	NaN	1	15.8	2	2	0.85326	0.91281	-0.0396196	6.8806	2
	1796	Tb927.7.3820	Tb927.7.3820		hypothetical protein, conserved	71.793	15.8	0	28.918	1		0.960566	-0.017473	0.77552	0.110407		10.9	5	5	0.739481	0.881523	-0.0547662	5.8205	5	6.3	3	3	0.8897	0.99655	-0.00150091	6.087	3	13.5	6	6	0.93111	1.0089	0.00384812	6.0728	6
	691	Tb927.11.10240	Tb927.11.10240		hslVU complex proteolytic subunit, putative,hslVU complex proteolytic subunit, threonine peptidase, Clan T(1), family T1B	22.684	15.8	0	17.641	1	1	1.01989	0.00855228	0.0949459	1.02252		4.8	1	1	0.84832	1.02127	0.00914185	NaN	1	11	2	2	0.89414	1.0016	0.000694316	NaN	1	15.8	4	4	0.96547	1.0371	0.0158206	2.6011	4
	411	Tb927.10.14630;Tb927.10.14750	Tb927.10.14630;Tb927.10.14750		fibrillarin, putative;fibrillarin, putative	24.997	15.8	0	21.013	2		0.943794	-0.025123	0.882879	0.0540987		11.4	2	2	0.743384	0.881135	-0.0549576	8.1422	2	15.8	3	3	0.8686	0.97571	-0.0106792	9.3738	3	11.4	2	2	0.9052	0.97784	-0.0097322	7.3192	2
	1913	Tb927.8.1510	Tb927.8.1510	DBP2.1	ATP-dependent DEAD/H RNA helicase, putative	62.439	15.8	0	22.299	1		0.978298	-0.00952879	0.727708	0.138043		5.8	3	3	0.838293	0.985804	-0.00620925	6.9406	2	9	4	4	0.91983	1.0267	0.0114436	15.69	4	8.3	4	4	0.85774	0.92508	-0.0338207	15.834	4
	1552	Tb927.5.4290	Tb927.5.4290		hypothetical protein, conserved	40.083	15.8	0	12.762	1		0.992406	-0.00331051	0.561305	0.250801		15.8	4	4	0.907771	1.08222	0.034314	19.515	4	4.2	1	1	0.84672	0.95896	-0.0181995	NaN	1	10.5	3	3	0.88205	0.94179	-0.0260459	26.216	3
	510	Tb927.10.3580	Tb927.10.3580		hypothetical protein, conserved	35.612	15.7	0	7.8666	1	1	1.04357	0.0185203	0.439536	0.357005		8	2	2	0.720825	0.835981	-0.0778038	3.7844	2	0	0	0	NaN	NaN		NaN	0	10.8	3	3	1.1686	1.3027	0.114844	17.344	3
	2095	Tb927.8.8300	Tb927.8.8300		amino acid transporter, putative	50.17	15.7	0	42.135	1	1	1.06131	0.0258424	0.292012	0.534599		9.6	3	3	0.753977	0.891981	-0.0496443	16.613	3	9.8	3	3	0.97026	1.0988	0.0409187	38.65	4	11.9	4	4	1.1251	1.2197	0.086253	18.026	6
	1215	Tb927.3.1200	Tb927.3.1200		hypothetical protein, conserved	83.763	15.7	0	47.5	1		1.04105	0.0174721	0.177776	0.750127		8.8	5	5	0.810833	0.974279	-0.0113167	7.4651	7	10.3	6	6	0.97049	1.0881	0.0366688	9.9001	7	14.1	7	7	0.99426	1.0643	0.0270641	10.406	7
	1869	Tb927.7.6890	Tb927.7.6890		hypothetical protein, conserved	28.794	15.7	0	18.134	1		0.956108	-0.0194932	0.679495	0.167813		15.7	3	3	0.907441	1.09021	0.0375122	13.305	4	11.8	2	2	0.72581	0.82107	-0.0856198	25.181	2	15.7	3	3	0.91409	0.9764	-0.0103722	4.1755	3
	876	Tb927.11.16550	Tb927.11.16550	ZC3H46	zinc finger protein family member, putative (ZC3H46)	56.434	15.7	0	33.625	1		0.912605	-0.039717	0.84958	0.0707958		6.3	2	2	0.781372	0.937032	-0.0282458	5.3214	2	9.4	3	3	0.71184	0.80502	-0.0941933	21.744	3	6.3	2	2	0.93854	1.0076	0.00328816	NaN	1
	1029	Tb927.3.4360;Tb927.11.6140	Tb927.3.4360;Tb927.11.6140		40S ribosomal protein S15A, putative;40S ribosomal protein S15A, putative	10.205	15.6	0	3.5755	2		1.17668	0.0706592	0.148843	0.827271		15.6	1	1	0.797321	0.961723	-0.0169498	NaN	1	15.6	1	1	1.041	1.1761	0.0704442	NaN	1	15.6	1	1	1.342	1.4404	0.158483	NaN	1
	1906	Tb927.8.1340;Tb927.8.1330	Tb927.8.1340;Tb927.8.1330		60S ribosomal protein L7a, putative;60S ribosomal protein L7a, putative	30.879	15.6	0	25.281	2		0.799412	-0.0972295	0.683773	0.165088		5.1	1	1	0.473754	0.566893	-0.246499	NaN	1	15.6	3	3	0.99566	1.1273	0.0520395	26.447	3	0	0	0	NaN	NaN		NaN	0
	1850	Tb927.7.5950;Tb927.7.5960;Tb927.7.6000;Tb927.7.5980	Tb927.7.5950;Tb927.7.5960	PAD3;PAD4;PAD6	protein associated with differentiation 3, putative;protein associated with differentiation 4, putative	65.344	15.6	0	17.54	4	1	0.902843	-0.0443875	0.679858	0.167582		13.6	7	1	0.866551	1.02843	0.012173	NaN	1	13.7	7	1	1.017	1.147	0.0595634	NaN	1	11.7	5	1	0.57756	0.62388	-0.204899	NaN	1
	484	Tb927.10.2800	Tb927.10.2800		hypothetical protein, conserved	18.838	15.6	0	10.197	1	1	0.924523	-0.0340824	0.807565	0.0928227		6.9	1	1	0.74162	0.875734	-0.057628	NaN	1	0	0	0	NaN	NaN		NaN	0	15.6	2	2	0.88843	0.97603	-0.0105368	9.5356	2
	589	Tb927.10.6460	Tb927.10.6460		protein phosphatase 2B, putative	44.052	15.6	0	9.8479	1		0.99415	-0.0025479	0.862836	0.0640717		15.6	5	5	0.847386	0.989217	-0.00470821	13.198	5	3.3	1	1	0.8687	0.99138	-0.00375985	NaN	1	12.3	4	4	0.93743	1.0019	0.000824377	6.4255	4
	2132	Tb927.9.11720	Tb927.9.11720		Iron-sulfur cluster assembly protein	19.436	15.6	0	34.523	1	1	0.949493	-0.0225081	0.938797	0.0274284		15.6	2	2	0.814996	0.924898	-0.033906	46.006	3	15	3	3	0.82086	0.93717	-0.0281816	24.11	4	15.6	4	4	0.91987	0.98756	-0.00543651	10.276	6
	1034	Tb927.11.6230	Tb927.11.6230	Sec61alpha	pretranslocation protein, alpha subunit, putative,SEC61-like (pretranslocation process) protein, putative	53.647	15.6	0	41.186	1		0.925216	-0.0337567	0.85786	0.0665835		5	2	2	0.846382	1.00734	0.0031778	12.7	2	15.6	6	6	0.74845	0.8379	-0.0768078	10.52	8	8.1	3	3	0.86182	0.93834	-0.0276398	2.7948	4
	518	Tb927.10.3770	Tb927.10.3770		predicted TPR repeat protein	78.604	15.6	0	48.465	1	1	0.980088	-0.00873478	0.695582	0.157652		9.3	3	3	0.838856	0.980777	-0.00842986	32.114	4	12.3	5	5	0.90878	1.0382	0.016281	21.599	5	6.6	3	3	0.86315	0.92458	-0.0340555	10.592	4
	2065	Tb927.8.6900	Tb927.8.6900		hypothetical protein, conserved	23.536	15.6	0	20.56	1		0.972487	-0.012116	0.781597	0.107017		15.6	3	3	0.827541	0.998104	-0.000824378	5.6452	3	12.3	2	2	0.89155	1.0039	0.00169045	4.656	2	15.6	3	3	0.86244	0.91788	-0.0372141	7.2854	3
	2017	Tb927.8.560	Tb927.8.560		hypothetical protein, conserved	64.616	15.6	0	27.269	1		0.94265	-0.0256495	0.827728	0.0821124		11.4	4	4	0.86881	1.03698	0.01577	50.779	5	11.4	4	4	0.80828	0.90884	-0.0415126	22.783	5	6.4	2	2	0.82648	0.88878	-0.0512057	9.9135	3
	1778	Tb927.7.330	Tb927.7.330		hypothetical protein	21.139	15.5	0	10.762	1		1.04991	0.0211533	0.369515	0.432368		10.9	3	3	0.802697	0.955932	-0.0195732	2.6181	4	7.3	2	2	0.79261	0.89621	-0.0475902	14.201	3	15.5	4	4	1.2514	1.3509	0.130623	48.903	3
	923	Tb927.11.2620	Tb927.11.2620		hypothetical protein, conserved	68.718	15.5	0	27.114	1		0.966972	-0.0145862	0.691012	0.160514		11.4	5	5	0.723956	0.864454	-0.0632583	43.755	5	9.5	5	5	0.89384	1.0005	0.000217093	7.8724	5	7.2	4	4	0.97498	1.0454	0.0192825	8.5774	4
	2090	Tb927.8.8170	Tb927.8.8170	MRB8170	mitochondrial RNA binding protein 1, putative (MRB8170)	100.4	15.5	0	38.562	1	1	0.990646	-0.00408158	0.619784	0.20776		10.7	6	6	0.874126	1.03643	0.01554	13.177	6	11	6	6	0.83527	0.94423	-0.0249222	26.16	6	15.5	10	10	0.91629	0.99343	-0.00286273	34.211	9
	1124	Tb927.11.9630	Tb927.11.9630		hypothetical protein, conserved	25.504	15.4	0.0014032	2.3598	1		0.863919	-0.0635267	0.611557	0.213563		0	0	0	NaN	NaN		NaN	0	11	1	1	0.98992	1.289	0.110253	NaN	1	4.4	1	1	0.53554	0.57902	-0.237306	13.552	2
	1160	Tb927.2.3080	Tb927.2.3080		fatty acid desaturase, putative,oleate desaturase, putative	47.078	15.4	0	19.26	1		1.00744	0.00321923	0.473603	0.324586		12.3	4	4	0.734053	0.839137	-0.0761669	21.168	4	2.2	1	1	1.0457	1.1798	0.0718084	NaN	1	15.4	5	5	0.9424	1.0328	0.0140162	18.882	5
	1210	Tb927.3.1020	Tb927.3.1020		hypothetical protein, conserved	54.34	15.4	0	29.56	1		1.02265	0.00972619	0.400243	0.397676		4.9	2	2	1.01305	1.1827	0.0728761	NaN	1	5.1	2	2	0.79909	0.9065	-0.0426322	NaN	1	8.1	3	3	0.92327	0.99755	-0.00106533	43.517	3
	1722	Tb927.7.1490	Tb927.7.1490		hypothetical protein, conserved	27.511	15.4	0	14.988	1	1	0.847938	-0.071636	0.82662	0.0826943		0	0	0	NaN	NaN		NaN	0	10.2	1	1	0.67564	0.7673	-0.115035	NaN	1	5.3	1	1	0.87663	0.93705	-0.0282372	NaN	1
	1658	Tb927.6.4130	Tb927.6.4130		hypothetical protein, conserved	11.734	15.4	0	9.5731	1	1	1.07283	0.0305316	0.144337	0.840622		15.4	1	1	0.942596	1.11022	0.0454102	NaN	1	0	0	0	NaN	NaN		NaN	0	15.4	2	2	0.95509	1.0367	0.0156531	6.4533	2
	1260	Tb927.3.2770	Tb927.3.2770		hypothetical protein, conserved	125.64	15.4	0	207.53	1		0.99608	-0.00170569	0.632295	0.19908		11.8	10	10	0.831186	0.990688	-0.00406332	13.124	11	10.5	9	9	0.86904	0.98206	-0.00786198	12.737	10	12.5	11	11	0.93411	1.0158	0.00680821	25.29	12
	330	Tb927.10.11760	Tb927.10.11760	PUF6	pumilio/PUF RNA binding protein 6 (PUF6)	93.062	15.4	0	47.59	1		0.990402	-0.00418852	0.581765	0.235253		9.6	5	5	0.899685	1.06985	0.0293233	19.806	7	11.2	6	6	0.86521	0.97679	-0.0101988	8.8105	6	12	7	7	0.85758	0.92963	-0.0316899	14.388	7
	1741	Tb927.7.2120	Tb927.7.2120		hypothetical protein, conserved	46.084	15.4	0	18.16	1		0.876816	-0.0570917	0.886717	0.0522148		15.4	3	3	0.784621	0.920725	-0.0358698	3.9034	3	0	0	0	NaN	NaN		NaN	0	6	1	1	0.77832	0.835	-0.0783135	NaN	1
	912	Tb927.11.2370	Tb927.11.2370		hypothetical protein, conserved	62.541	15.3	0	13.261	1		1.16679	0.0669922	0.113916	0.943415		9.2	3	3	0.999201	0.982898	-0.00749173	20.747	3	1.7	1	1	1.1718	1.331	0.124178	NaN	1	15.3	5	5	1.1403	1.2142	0.0842902	19.378	4
	1522	Tb927.5.3140	Tb927.5.3140		hypothetical protein, conserved	25.738	15.3	0	11.626	1		0.883175	-0.0539532	0.764512	0.116616		6	1	1	0.828775	0.989217	-0.00470821	NaN	1	15.3	4	4	0.70315	0.7885	-0.103198	92.126	3	0	0	0	NaN	NaN		NaN	0
	1897	Tb927.7.910;Tb11.v5.0841	Tb927.7.910;Tb11.v5.0841		hypothetical protein, conserved;hypothetical protein, conserved	80.436	15.3	0	22.689	2	1	0.926785	-0.033021	0.909754	0.041076		4.2	2	2	0.752389	0.893495	-0.0489077	5.7757	2	11.1	4	4	0.89039	0.99915	-0.000369307	21.625	6	7.4	4	4	0.83102	0.89169	-0.0497861	19.285	3
	1348	Tb927.3.910	Tb927.3.910		gamma-tubulin,tubulin gamma chain	50.119	15.2	0	15.27	1		1.2695	0.103633	0.054912	1.26033		15.2	4	4	1.10616	1.3234	0.121691	12.884	4	0	0	0	NaN	NaN		NaN	0	7.4	2	2	1.1309	1.2178	0.085576	61.478	2
	803	Tb927.11.14080	Tb927.11.14080	CYC2	cyclin 2,G1 cyclin (CYC2)	24.301	15.2	0	46.546	1		0.876584	-0.0572064	0.740203	0.130649		15.2	1	1	0.910913	1.09664	0.0400621	NaN	1	15.2	1	1	0.86612	0.97817	-0.00958566	NaN	1	15.2	1	1	0.57941	0.62792	-0.202096	NaN	1
	1277	Tb927.3.3520	Tb927.3.3520		hypothetical protein, conserved	47.641	15.2	0	25.189	1		1.01578	0.00679835	0.302905	0.518693		13.3	4	4	0.915919	1.06316	0.0265994	15.271	5	6.1	2	2	0.86212	0.9723	-0.0121997	8.0294	2	12.9	4	4	0.94193	1.0139	0.00599512	41.095	4
	1426	Tb927.4.4090	Tb927.4.4090		hypothetical protein, conserved	35.549	15.2	0	39.653	1		0.975945	-0.0105744	0.966838	0.0146462		6.4	2	2	0.825151	0.967024	-0.0145626	2.1524	2	2.7	1	1	0.85834	0.97241	-0.0121506	NaN	1	11.6	3	3	0.90779	0.98853	-0.00501015	6.2823	3
	1843	Tb927.7.5780	Tb927.7.5780		hypothetical protein, conserved	17.027	15.2	0	4.73	1			NaN				15.2	1	1	NaN	NaN		NaN	0	15.2	1	1	NaN	NaN		NaN	0	0	0	0	NaN	NaN		NaN	0
	951	Tb927.11.3530	Tb927.11.3530		hypothetical protein, conserved	26.464	15.1	0	10.002	1		1.30226	0.114697	0.26641	0.574449		11.1	2	2	0.810373	0.96918	-0.0135956	5.128	2	4.9	1	1	0.77496	0.8656	-0.0626828	NaN	1	10.2	3	3	2.4288	2.6325	0.420368	69.275	3
	1253	Tb927.3.2410	Tb927.3.2410		peroxisome assembly protein, putative	32.979	15.1	0	11.979	1		1.12046	0.0493976	0.0624944	1.20416		0	0	0	NaN	NaN		NaN	0	11.1	2	2	0.96891	1.0954	0.0395727	4.9248	2	10.1	2	2	1.0566	1.1461	0.0592225	NaN	1
	1740	Tb927.7.2110	Tb927.7.2110	kkt11	hypothetical protein, conserved	29.286	15.1	0	9.1543	1		1.01425	0.006147	0.476573	0.321871		9.2	2	2	0.704573	0.8371	-0.0772225	NaN	1	0	0	0	NaN	NaN		NaN	0	11.2	2	2	1.1408	1.2289	0.0895165	23.43	2
	519	Tb927.10.3810	Tb927.10.3810		hypothetical protein, conserved	64.888	15.1	0	14.076	1		1.02883	0.0123456	0.396701	0.401536		1.8	1	1	0.726375	0.859771	-0.0656171	NaN	1	13.3	4	4	0.95235	1.0653	0.0274719	58.911	4	1.8	1	1	1.1177	1.189	0.0751819	NaN	1
	1728	Tb927.7.1670	Tb927.7.1670	eif4e6	hypothetical protein, conserved	20.864	15.1	0	5.8922	1		1.00367	0.00159026	0.488441	0.311188		7.5	1	1	0.764409	0.907441	-0.0421816	27.36	2	0	0	0	NaN	NaN		NaN	0	7.5	1	1	1.0019	1.1101	0.0453621	1.221	2
	1149	Tb927.2.1860	Tb927.2.1860	MRB1860	mitochondrial RNA binding complex 1 subunit (MRB1860)	96.551	15.1	0	14.214	1	1	1.0413	0.0175769	0.335641	0.474124		7.7	4	4	0.960984	1.1357	0.0552655	87.292	3	6.7	4	4	1.0065	1.1253	0.0512683	21.405	3	7.3	4	4	0.82347	0.88348	-0.0538033	55.681	4
	2310	Tb927.9.8680	Tb927.9.8680		cytochrome c oxidase assembly factor, putative	30.64	15.1	0	8.2639	1	1	1.05445	0.0230266	0.167765	0.7753		4.1	1	1	0.929282	1.11435	0.0470236	NaN	1	3	1	1	0.86279	0.97066	-0.0129329	NaN	1	15.1	4	4	1.0084	1.0839	0.0349892	10.933	4
	788	Tb927.11.13650	Tb927.11.13650	CYB5	cytochrome b5, putative (CYB5)	12.906	15.1	0	11.093	1		1.03994	0.0170082	0.164626	0.783503		15.1	1	1	0.877424	1.04048	0.0172316	16.14	2	15.1	1	1	0.87066	0.98597	-0.0061363	NaN	1	15.1	1	1	1.0219	1.0963	0.0399294	11.802	2
	1292	Tb927.3.4030	Tb927.3.4030		hypothetical protein, conserved	135.25	15.1	0	57.049	1	1	1.0204	0.00877016	0.382362	0.417526		10.3	7	7	0.988924	1.14816	0.0600017	18.557	8	13	9	9	0.85229	0.96063	-0.0174439	15.762	10	13.7	10	10	0.89092	0.96328	-0.0162475	22.942	13
	1535	Tb927.5.3630	Tb927.5.3630		hypothetical protein, conserved	44.693	15.1	0	33.992	1		1.03969	0.0169059	0.255243	0.593046		11.4	4	4	0.969744	1.14034	0.0570351	23.723	7	15.1	4	4	0.86535	0.96491	-0.0155132	20.586	3	12.2	4	4	0.94211	1.0214	0.00919585	4.0527	5
	463	Tb927.10.2200	Tb927.10.2200		hypothetical protein, conserved	37.967	15.1	0	11.346	1	1	0.791023	-0.101811	0.87607	0.057461		7.7	2	2	0.804894	0.948137	-0.023129	8.5006	2	13	3	3	0.52484	0.59354	-0.22655	147.74	3	11.8	3	3	0.80957	0.87952	-0.0557543	36.91	3
	671	Tb927.10.9860	Tb927.10.9860		Mitochondrial N(5)-glutamine methyltransferase MTQ1, putative	47.494	15	0	38.198	1		1.47292	0.16818	0.13618	0.865886		9.8	2	2	0.741675	0.879275	-0.0558751	16.078	2	15	3	3	1.7173	1.9392	0.287623	48.879	3	9.8	2	2	1.7452	1.8741	0.272793	61.061	2
	1684	Tb927.6.4930	Tb927.6.4930		hypothetical protein, conserved	30.051	15	0	8.5745	1	1	1.37481	0.138242	0.251416	0.599608		7.3	2	2	1.59951	1.89548	0.27772	99.489	2	15	4	4	0.89504	0.99716	-0.00123515	1.8364	4	0	0	0	NaN	NaN		NaN	0
	1170	Tb927.2.3910	Tb927.2.3910		beta-ketoacyl synthase family protein, putative	52.044	15	0	14.089	1	1	1.16717	0.0671347	0.0858029	1.0665		15	4	4	0.8967	1.05886	0.0248394	9.5386	4	12.8	3	3	1.1833	1.3493	0.130109	17.233	3	8.4	2	2	1.0248	1.1129	0.0464561	11.08	2
	353	Tb927.10.12660	Tb927.10.12660	PUF2	pumilio/PUF RNA binding protein 2 (PUF2)	92.245	15	0	45.351	1		0.986911	-0.00572184	0.543361	0.264912		12.2	6	6	1.006	1.19464	0.0772381	12.944	7	5.9	3	3	0.72496	0.82505	-0.0835197	50.716	4	6.8	5	5	0.90906	0.97525	-0.010884	24.71	6
	643	Tb927.10.8720	Tb927.10.8720		CCR4-NOT transcription complex subunit 10, putative	61.501	15	0	51.728	1		1.0189	0.00813331	0.331942	0.478938		9.2	4	4	0.797639	0.948587	-0.022923	16.208	4	13	6	6	0.95101	1.0743	0.0311256	4.738	7	9	4	4	0.9696	1.038	0.0161974	3.536	4
	692	Tb927.11.10260	Tb927.11.10260		hypothetical protein, conserved	51.855	15	0	26.964	1		1.02835	0.0121412	0.288238	0.540248		5.5	2	2	0.915248	1.10463	0.0432172	9.9843	3	10.1	4	4	0.84553	0.95423	-0.0203469	15.496	5	15	6	6	0.96058	1.0317	0.0135534	15.053	6
	173	Tb927.11.3650;Tb11.v5.0435	Tb927.11.3650;Tb11.v5.0435		adenylosuccinate synthetase, putative;adenylosuccinate synthetase, putative	66.674	15	0	15.844	2		0.844247	-0.0735306	0.867008	0.0619769		2.5	1	1	0.835631	1.00009	3.90847e-05	NaN	1	8.8	4	4	0.60774	0.68547	-0.164012	47.367	3	8.1	3	3	0.8227	0.87777	-0.0566193	20.202	3
	572	Tb927.10.5830	Tb927.10.5830		hypothetical protein, conserved	59.941	15	0	32.494	1	1	0.891766	-0.049749	0.873595	0.05869		11.4	3	3	0.828363	0.943931	-0.0250599	7.0745	5	3.7	1	1	0.8526	0.97209	-0.0122935	NaN	1	7.7	2	2	0.71177	0.77287	-0.111894	41.783	2
	757	Tb927.11.12590	Tb927.11.12590		hypothetical protein, conserved	27.968	15	0	6.2131	1		0.957932	-0.0186651	0.732624	0.135119		11.1	2	2	0.856531	1.0276	0.0118245	6.4527	2	5.5	1	1	0.87939	1.0015	0.000650954	NaN	1	4	1	1	0.78696	0.85414	-0.0684709	NaN	1
	1163	Tb927.2.340;Tb11.v5.0295	Tb927.2.340		retrotransposon hot spot protein 4 (RHS4), putative	97.84	15	0	16.84	2		1.01607	0.00692528	0.340844	0.467445		7.1	7	2	0.88881	1.04541	0.0192879	19.088	3	7.6	6	3	0.93321	1.0559	0.0236228	7.746	4	11.1	10	1	0.88756	0.95031	-0.0221347	NaN	1
	1341	Tb927.3.680	Tb927.3.680		cytochrome P450, putative	66.122	14.9	0	23.421	1		1.04478	0.0190254	0.114854	0.939852		9.9	4	4	0.878657	1.02052	0.0088228	31.786	4	9.9	4	4	0.90643	1.0162	0.00697919	12.079	5	13.2	5	5	1.0308	1.0997	0.0412742	8.8195	5
	287	Tb927.10.10130	Tb927.10.10130	MRB10130	mitochondrial RNA binding complex 1 subunit (MRB10130)	61.046	14.9	0	23.535	1	1	0.789922	-0.102416	0.823355	0.0844129		7.3	3	3	0.755002	0.902201	-0.0446965	14.738	4	14.9	5	5	0.89788	1.0185	0.00796103	16.289	5	5.3	2	2	0.49846	0.5364	-0.270511	84.787	2
	1400	Tb927.4.2880	Tb927.4.2880	TbNup225	Nucleoporin (TbNup225)	225.59	14.9	0	93.516	1		1.02222	0.00954306	0.384165	0.415482		9.5	11	11	0.979912	1.16263	0.0654412	25.146	14	9.2	11	11	0.86309	0.97649	-0.0103322	17.139	12	10.8	14	14	0.88067	0.94085	-0.0264796	16.83	17
	1183	Tb927.2.450	Tb927.2.450		retrotransposon hot spot protein 4 (RHS4), putative	97.997	14.9	0	16.168	1		0.879087	-0.0559679	0.961181	0.0171948		9.9	7	1	0.68278	0.819941	-0.0862174	NaN	1	13	9	1	0.82816	0.9352	-0.0290955	NaN	1	14.9	11	1	0.81868	0.88595	-0.0525908	NaN	1
	2058	Tb927.8.6640	Tb927.8.6640		hypothetical protein, conserved	67.498	14.9	0	28.362	1		1.01421	0.00612607	0.256911	0.590218		10.1	4	4	0.880127	1.03509	0.0149781	17.263	5	13.2	5	5	0.92383	1.0299	0.0127951	9.0287	5	9.8	4	4	0.9166	0.9786	-0.00939479	9.3462	4
	241	Tb927.1.180;Tb927.1.220;Tb927.2.370	Tb927.1.180;Tb927.1.220;Tb927.2.370		retrotransposon hot spot protein 1 (RHS1), putative;retrotransposon hot spot protein 1 (RHS1), putative;retrotransposon hot spot protein 1 (RHS1), putative	94.488	14.8	0	24.241	3		1.04229	0.0179887	0.321401	0.492952		8	5	0	NaN	NaN		NaN	0	7.8	5	2	0.85857	0.97581	-0.0106347	26.002	2	11.4	8	2	1.042	1.1133	0.0466122	10.083	2
	1077	Tb927.11.8060	Tb927.11.8060		hypothetical protein, conserved	63.596	14.8	0	107.87	1		1.05509	0.0232889	0.266233	0.574739		8.9	4	4	0.99552	1.16042	0.0646137	21.651	4	7	3	3	0.8233	0.91682	-0.0377159	6.8463	4	12.9	5	5	1.0186	1.104	0.0429691	16.591	6
	985	Tb927.11.4900	Tb927.11.4900		guanine nucleotide-binding beta subunit-like protein,G-protein (beta)-like protein,beta transducin-like protein	61.857	14.8	0	10.182	1		0.9644	-0.0157426	0.603045	0.21965		9.5	4	4	1.00572	1.19135	0.0760412	17.494	6	7.1	3	3	0.84939	0.96334	-0.0162204	20.774	5	10.2	4	4	0.73502	0.78154	-0.107049	37.996	6
	1412	Tb927.4.3610;Tb927.4.3560	Tb927.4.3610;Tb927.4.3560		protein phosphatase 1, putative;protein phoshatase 1, putative	23.433	14.8	0	3.9793	2		1.08036	0.0335672	0.118627	0.925815		0	0	0	NaN	NaN		NaN	0	11	1	1	0.98942	1.1135	0.0466902	NaN	1	3.8	1	1	0.97741	1.0482	0.0204442	NaN	1
	1622	Tb927.6.2640	Tb927.6.2640	TbKap60	importin alpha subunit, putative (TbKap60)	58.065	14.8	0	26.163	1		1.02825	0.0120979	0.28898	0.539132		14.8	5	5	0.925583	1.10429	0.0430827	51.143	5	8.1	3	3	0.91549	1.0321	0.0137218	27.412	4	8.1	3	3	0.88311	0.95387	-0.0205108	11.573	5
	151	Tb927.7.4500;Tb11.v5.0263	Tb927.7.4500;Tb11.v5.0263		hypothetical protein, conserved;hypothetical protein, conserved	58.428	14.8	0	19.419	2		0.98135	-0.00817603	0.780436	0.107663		9.8	4	4	0.847458	0.990982	-0.00393419	108.51	5	5.7	2	2	0.89353	1.0093	0.00402027	144.3	3	11.2	4	4	0.86424	0.9449	-0.0246142	78.328	5
	1314	Tb927.3.4880	Tb927.3.4880		hypothetical protein, conserved	20.828	14.8	0	14.653	1		1.3622	0.134241				14.8	2	2	NaN	NaN		NaN	0	9.3	1	1	NaN	NaN		NaN	0	14.8	2	2	1.2565	1.3622	0.134241	NaN	1
	1813	Tb927.7.4310	Tb927.7.4310		hypothetical protein, conserved	53.736	14.7	0	13.749	1	1	1.08383	0.0349595	0.206341	0.685414		8	3	3	0.857486	0.99453	-0.00238207	38.853	3	7.5	3	3	0.8899	1.0099	0.00427837	53.901	3	9.6	4	4	1.1739	1.2676	0.102982	24.592	4
	2304	Tb927.9.8160	Tb927.9.8160		chaperone protein DNAj, putative	47.83	14.7	0	42.95	1		1.0877	0.0365077	0.144582	0.839886		10	4	4	0.829394	0.996214	-0.00164723	13.533	4	14.7	4	4	0.95292	1.0621	0.0261654	9.0189	4	8.1	3	3	1.0968	1.2162	0.085005	24.941	3
	1543	Tb927.5.3880	Tb927.5.3880		hypothetical protein, conserved	82.603	14.7	0	23.951	1		0.983295	-0.00731613	0.579309	0.23709		7.6	3	3	0.78964	0.920302	-0.0360697	11.408	3	0	0	0	NaN	NaN		NaN	0	12.6	7	7	0.96758	1.0506	0.0214374	12.412	7
	638	Tb927.10.8410	Tb927.10.8410		hypothetical protein, conserved	27.797	14.7	0	9.104	1		1.03802	0.0162043	0.0694716	1.15819		7.6	2	2	0.856384	1.01131	0.00488258	9.137	2	8	2	2	0.91748	1.0362	0.0154436	1.8262	2	6.7	2	2	0.99863	1.0673	0.0282865	9.3444	2
	1402	Tb927.4.3070	Tb927.4.3070		hypothetical protein, conserved	51.431	14.7	0	20.872	1	1	1.00785	0.00339556	0.42703	0.369541		8.3	2	2	0.867528	1.0415	0.0176609	8.6888	2	7.6	2	2	0.82808	0.93524	-0.0290769	7.8866	2	10.5	3	3	0.94932	1.051	0.0216027	3.2558	3
	1051	Tb927.11.6720	Tb927.11.6720		hypothetical protein, conserved	117.56	14.6	0	50.689	1		1.00314	0.00136033	0.486025	0.313341		11.5	8	8	0.722909	0.858811	-0.0661022	9.1389	8	9.9	7	7	0.99397	1.1138	0.0468072	33.689	7	7	5	5	0.97701	1.0553	0.0233759	6.3073	6
	1983	Tb927.8.4230	Tb927.8.4230		hypothetical protein, conserved	119.02	14.6	0	71.488	1	1	0.965391	-0.015297	0.74318	0.128906		7.6	4	4	0.752672	0.886289	-0.0524246	16.605	5	9.4	5	5	0.90591	1.0309	0.0132165	0.34496	5	5.5	4	4	0.91574	0.98473	-0.00668283	11.836	4
	369	Tb927.10.1310	Tb927.10.1310		hypothetical protein, conserved	102.74	14.6	0	36.653	1		0.992991	-0.00305467	0.581114	0.235739		10.6	7	7	0.845809	1.00042	0.000182365	19.955	7	8.1	6	6	0.93329	1.0421	0.0179094	14.204	7	10.6	7	7	0.88058	0.93917	-0.0272558	39.935	5
	1636	Tb927.6.3510;Tb11.v5.0635	Tb927.6.3510;Tb11.v5.0635		tRNA modification enzyme, putative;tRNA modification enzyme, putative	59.67	14.6	0	16.945	2	1	0.96763	-0.0142908	0.705759	0.151344		12.5	5	5	0.903751	1.06851	0.0287798	7.7924	5	12.7	5	5	0.82824	0.94346	-0.0252765	23.818	4	10.8	4	4	0.82943	0.89872	-0.0463756	30.032	4
	829	Tb927.11.14970	Tb927.11.14970		hypothetical protein, conserved	93.162	14.5	0	74.794	1		1.0434	0.018452	0.252368	0.597966		0.9	1	1	0.791327	0.939055	-0.0273088	NaN	1	8.9	5	5	0.97557	1.0975	0.0404045	32.308	5	8.1	6	6	1.0182	1.1022	0.0422604	14.198	5
	2332	Tb927.9.9810	Tb927.9.9810		hypothetical protein, conserved	16.882	14.5	0	12.614	1		1.00067	0.000289736	0.496859	0.303767		14.5	2	2	0.814996	0.969086	-0.0136376	5.8628	3	14.5	2	2	0.79525	0.89552	-0.0479247	11.733	3	14.5	2	2	1.0774	1.1546	0.0624316	14.927	3
	2333	Tb927.9.9840	Tb927.9.9840	GCVH	lipoic acid containing carrier protein, putative (GCVH)	15.216	14.5	0	5.7904	1	1	1.04372	0.0185843	0.215502	0.666549		7.2	1	1	0.9176	1.08657	0.0360565	NaN	1	7.2	1	1	0.82586	0.9564	-0.0193604	NaN	1	14.5	2	2	0.99558	1.0941	0.039057	13.176	3
	1019	Tb927.11.5920	Tb927.11.5920		hypothetical protein, conserved	80.414	14.5	0	42.736	1	1	0.989247	-0.00469522	0.591079	0.228354		5.8	3	3	0.870246	1.01927	0.00829095	14.91	5	8.3	4	4	0.80987	0.91176	-0.0401195	29.686	6	10.7	6	6	0.9593	1.0417	0.0177427	9.9721	8
	2270	Tb927.9.6310	Tb927.9.6310		ABC transporter, putative	72.215	14.4	0	39.187	1		1.11149	0.0459047	0.147152	0.832233		7.3	3	3	0.983478	1.1708	0.0684812	6.8028	4	9.1	4	4	0.84681	0.95866	-0.0183354	2.1703	4	9.9	4	4	1.1489	1.2234	0.0875685	7.2007	5
	1523	Tb927.5.3220	Tb927.5.3220		signal peptidase type I, putative	23.706	14.4	0	5.1919	1		1.09383	0.0389516	0.265438	0.576038		11.1	2	2	1.01594	1.20718	0.0817702	2.114	2	11.1	2	2	1.1164	1.257	0.0993353	64.595	2	14.4	3	3	0.79579	0.86248	-0.064251	32.951	3
	1994	Tb927.8.4770	Tb927.8.4770	TbRAB18	small GTP-binding protein Rab18 (TbRAB18)	23.467	14.4	0	9.0893	1		1.00127	0.00054957	0.485055	0.314209		10.7	2	2	0.81726	0.974659	-0.0111474	2.1531	2	0	0	0	NaN	NaN		NaN	0	14.4	3	3	0.96285	1.0286	0.0122465	11.925	3
	1235	Tb927.3.1940	Tb927.3.1940		hypothetical protein, conserved	49.435	14.4	0	14.479	1	1	1.04544	0.0193004	0.072657	1.13872		7.1	3	3	0.846239	1.00676	0.00292811	8.7512	3	5	2	2	0.93699	1.0598	0.0252239	5.6602	2	8.2	4	4	0.9853	1.0709	0.0297489	14.067	4
	1371	Tb927.4.1920	Tb927.4.1920	TbGPI16	GPI transamidase, putative (TbGPI16)	75.806	14.4	0	70.106	1		1.04978	0.0210985	0.261745	0.582121		10.5	3	3	0.98561	1.18251	0.0728041	11.298	3	13.1	4	4	0.83989	0.95253	-0.0211213	9.0255	5	14.4	5	5	0.92127	1.0271	0.0116127	13.883	7
	1621	Tb927.6.2630	Tb927.6.2630		hypothetical protein, conserved	48.676	14.4	0	21.993	1		0.928049	-0.0324293	0.945576	0.0243033		9.6	3	3	0.829394	0.978474	-0.00945089	13.101	3	8.4	3	3	0.87884	0.91132	-0.0403291	9.5944	3	8.2	3	3	0.83819	0.89638	-0.0475078	6.408	3
	828	Tb927.11.14950	Tb927.11.14950	ZFP2	zinc finger protein 2 (ZFP2)	15.767	14.4	0.0092348	1.8188	1			NaN				0	0	0	NaN	NaN		NaN	0	0	0	0	NaN	NaN		NaN	0	14.4	1	1	NaN	NaN		NaN	0
	2283	Tb927.9.7080	Tb927.9.7080		hypothetical protein, conserved	13.925	14.3	0	8.0594	1		1.09192	0.0381908	0.201702	0.695289		0	0	0	NaN	NaN		NaN	0	14.3	1	1	0.9054	1.0236	0.0101303	NaN	1	14.3	1	1	1.0723	1.1648	0.0662514	NaN	1
	1198	Tb927.2.5230	Tb927.2.5230		protein kinase, putative	30.737	14.3	0	5.5899	1		1.08305	0.0346485	0.287695	0.541068		6.5	1	1	1.08398	1.26899	0.103457	NaN	1	7.9	2	2	1.0377	1.1704	0.0683343	NaN	1	10	2	2	0.80327	0.85537	-0.067846	NaN	1
	1686	Tb927.6.4950	Tb927.6.4950		mago nashi-like protein, putative	17.146	14.3	0	5.9837	1		0.990252	-0.00425433	0.53693	0.270082		14.3	2	2	1.01087	1.18961	0.0754053	21.673	2	14.3	2	2	0.82707	0.93263	-0.0302906	7.9994	2	14.3	2	2	0.7955	0.87523	-0.0578778	18.082	2
	203	Tb11.v5.0638;Tb927.10.1040;Tb927.10.1050;Tb927.10.1030	Tb11.v5.0638;Tb927.10.1040;Tb927.10.1050;Tb927.10.1030	CBP1;CBP1;CBP1;CBP1	serine carboxypeptidase III precursor, putative (CBP1);serine carboxypeptidase III precursor, putative,serine carboxypeptidase (CBP1) precursor, putative,serine peptidase, Clan SC, Family S10 (CBP1);serine carboxypeptidase III precursor, putative,serine	51.565	14.3	0	41.602	4		1.01235	0.00532889	0.376753	0.423943		10.2	3	3	0.819739	0.973141	-0.0118241	14.22	3	12.7	3	3	0.87087	0.98397	-0.00701814	12.147	3	5.4	2	2	1.0036	1.0835	0.0348289	9.8312	2
	2271	Tb927.9.6370;Tb927.9.6380;Tb927.9.6360	Tb927.9.6370;Tb927.9.6380;Tb927.9.6360		hypothetical protein, conserved;hypothetical protein, conserved;hypothetical protein, conserved	51.635	14.3	0	16.464	3		0.719817	-0.142778	0.869357	0.060802		5.1	2	2	0.664099	0.774234	-0.111128	40.776	2	9.8	3	3	0.88819	0.99673	-0.00142247	10.393	3	7.9	3	3	0.44576	0.4833	-0.315783	96.593	2
	1827	Tb927.7.5160	Tb927.7.5160		deoxyuridine triphosphatase, putative,dUTP diphosphatase	31.943	14.3	0	11.227	1	1	0.943212	-0.0253907	0.805305	0.0940398		3.1	1	1	0.710227	0.849907	-0.0706288	NaN	1	11.1	3	3	0.86267	0.97196	-0.0123516	3.7447	3	11.5	3	3	0.93704	1.0158	0.00680821	118.31	3
	1987	Tb927.8.4380	Tb927.8.4380	ATOM12	hypothetical protein, conserved	11.86	14.3	0	10.697	1	1	0.979781	-0.00887119	0.621062	0.206865		14.3	2	2	0.872144	1.04491	0.0190789	2.8948	2	11.4	1	1	0.76958	0.8729	-0.0590355	NaN	1	11.4	1	1	0.95412	1.0312	0.0133429	NaN	1
	2027	Tb927.8.590	Tb927.8.590		carnitine O-palmitoyltransferase, putative	75.905	14.3	0	15.061	1		0.973179	-0.0118072	0.788035	0.103454		10	4	4	0.78064	0.927128	-0.0328604	7.5602	3	4.3	2	2	0.90844	1.0189	0.00813156	28.862	2	8.6	5	5	0.9015	0.97568	-0.0106926	4.2897	5
	1311	Tb927.3.4760;Tb927.3.4720	Tb927.3.4760;Tb927.3.4720		dynamin, putative,vacuolar sortin protein 1, putative;dynamin, putative,vacuolar sortin protein 1, putative	73.148	14.2	0	16.807	2		1.06359	0.0267724	0.0680884	1.16693		8.6	4	4	0.899442	1.05942	0.0250694	12.223	4	8.6	4	4	0.98412	1.1135	0.0466902	15.486	4	12.4	5	5	0.94848	1.0199	0.00855759	13.636	5
	1673	Tb927.6.4440	Tb927.6.4440	RBP42	hypothetical protein, conserved	37.718	14.2	0	46.602	1		1.03097	0.013245	0.148269	0.828951		14.2	3	3	0.846525	1.00648	0.00280601	18.519	6	14.2	3	3	0.95524	1.0768	0.032135	83.242	5	14.2	3	3	0.94418	1.0111	0.00479411	4.9405	5
	2214	Tb927.9.2470;Tb927.9.2490	Tb927.9.2470;Tb927.9.2490	NOP86;NOP66	nucleolar protein (NOP86);nucleolar protein (NOP66)	86.202	14.1	0	33.142	2		1.07827	0.0327265	0.244432	0.611842		11.2	6	6	0.912909	1.08062	0.033675	16.827	6	11.4	6	6	0.82611	0.92227	-0.0351419	10.056	6	10.4	6	6	1.1823	1.2579	0.0996461	11.327	8
	159	Tb927.10.15950;Tb11.v5.0305	Tb927.10.15950;Tb11.v5.0305	TRF4	TFIID-like protein, putative (TRF4);TFIID-like protein, putative	28.822	14.1	0	3.8061	2		0.9461	-0.0240628	0.725267	0.139502		0	0	0	NaN	NaN		NaN	0	14.1	2	2	0.784	0.88677	-0.052189	7.048	2	11.1	1	1	0.95241	1.0094	0.0040633	NaN	1
	1471	Tb927.5.1140	Tb927.5.1140	C/EK1	choline/ethanolamine kinase (C/EK1)	73.294	14.1	0	54.112	1		0.943069	-0.0254567	0.773876	0.111329		14.1	5	5	0.701311	0.834446	-0.0786018	5.8527	6	4.3	2	2	0.91262	1.0312	0.0133429	9.9075	2	10.2	3	3	0.89638	0.97474	-0.0111112	3.1599	4
	1076	Tb927.11.8040	Tb927.11.8040		hypothetical protein, conserved	22.255	14.1	0	11.828	1	1	0.966537	-0.0147813	0.866886	0.062038		14.1	1	1	0.79321	0.939232	-0.0272273	NaN	1	14.1	1	1	0.84873	0.95193	-0.021395	NaN	1	14.1	1	1	0.94644	1.0099	0.00427837	NaN	1
	747	Tb927.11.12200	Tb927.11.12200		hypothetical protein, conserved	10.796	14.1	0.0066548	1.8699	1	1	1.6206	0.209676				0	0	0	NaN	NaN		NaN	0	14.1	1	1	1.4269	1.6206	0.209676	NaN	1	0	0	0	NaN	NaN		NaN	0
	2232	Tb927.9.3620	Tb927.9.3620		hypothetical protein, conserved	25.222	13.9	0	10.551	1		1.19053	0.0757401	0.183214	0.737041		9.5	2	2	0.861772	1.03062	0.0130986	6.7746	2	4.3	1	1	1.4157	1.6088	0.206502	NaN	1	10	2	2	0.9509	1.0177	0.00761977	4.8079	2
	1443	Tb927.4.4630	Tb927.4.4630		hypothetical protein, conserved	18.467	13.9	0	7.6909	1	1	0.934617	-0.0293663	0.577888	0.238157		7.3	1	1	1.20751	1.45197	0.161957	NaN	1	7.3	1	1	0.94069	1.0757	0.0316912	NaN	1	13.9	2	2	0.4847	0.5227	-0.281747	33.098	3
	343	Tb927.10.12330	Tb927.10.12330	ZC3H34	zinc finger protein family member, putative (ZC3H34)	22.365	13.9	0	7.3682	1		0.867417	-0.061772	0.895636	0.0478684		13.9	2	2	0.886997	0.910415	-0.0407605	29.548	3	0	0	0	NaN	NaN		NaN	0	5	1	1	0.7694	0.82645	-0.0827834	NaN	1
	2123	Tb927.9.11150	Tb927.9.11150		hypothetical protein, conserved	91.905	13.8	0	27.977	1		1.11078	0.0456273	0.158075	0.801138		7.3	5	5	0.79694	0.950119	-0.0222221	5.1226	5	10.3	6	6	1.0839	1.2293	0.0896579	13.361	6	8.2	6	6	1.0806	1.1734	0.0694461	7.134	8
	694	Tb927.11.10330	Tb927.11.10330		hypothetical protein, conserved	70.392	13.8	0	19.658	1		0.896458	-0.0474703	0.687865	0.162497		6.3	2	2	0.512479	0.612482	-0.212906	59.367	2	8.5	3	3	0.98476	1.0997	0.0412742	41.214	3	11.6	5	5	0.98307	1.0696	0.0292214	6.8587	5
	175	Tb927.1.1560;Tb11.v5.0464	Tb927.1.1560;Tb11.v5.0464		vesicular-fusion protein nsf, putative,N-ethylmaleimide sensitive factor (NsF);vesicular-fusion protein nsf, putative	79.953	13.8	0	19.252	2		1.02539	0.0108905	0.394672	0.403763		6.2	4	4	0.9999	1.20463	0.080854	14.703	4	5.8	4	4	0.81141	0.91888	-0.0367412	21.115	5	8	5	5	0.89842	0.974	-0.011441	6.2124	5
	357	Tb927.10.12810	Tb927.10.12810		cholinephosphate cytidylyltransferase A, putative	56.299	13.8	0	17.866	1		1.01559	0.00671724	0.265003	0.576749		8.9	4	4	0.808015	0.975039	-0.010978	12.4	4	12.5	6	6	0.91193	1.0318	0.0135955	9.6953	6	8.1	4	4	0.95741	1.0412	0.0175342	20.534	4
	111	Tb11.02.5105b;Tb11.02.5105	Tb11.02.5105b;Tb11.02.5105		hypothetical protein, conserved;hypothetical protein, conserved	14.971	13.8	0.0014065	2.3967	2	1	0.998891	-0.000482067	0.505049	0.296666		7.7	1	1	0.904977	1.07128	0.0299042	NaN	1	0	0	0	NaN	NaN		NaN	0	13.8	2	2	0.87131	0.93139	-0.0308684	NaN	1
	2206	Tb927.9.1950	Tb927.9.1950		hypothetical protein, conserved	46.906	13.8	0	13.734	1	1	0.883518	-0.0537844	0.884266	0.0534172		7.1	2	2	0.797575	0.955201	-0.0199052	32.009	3	7.1	2	2	0.68356	0.76374	-0.117054	NaN	1	5.9	2	2	0.86794	0.94538	-0.0243936	16.877	2
	1894	Tb927.7.880	Tb927.7.880	RPB25	RNA-binding protein, putative (RPB25)	29.808	13.7	0	7.6427	1		1.65426	0.218603	0.154572	0.81087		4.7	1	1	2.88101	3.46452	0.539643	NaN	1	10.1	2	2	0.93866	1.0553	0.0233759	38.074	3	8.3	2	2	1.1387	1.2382	0.0927908	65.221	2
	2059	Tb927.8.6650	Tb927.8.6650	DRBD12	RNA-binding protein, putative (DRBD12)	71.652	13.7	0	13.603	1		1.1185	0.0486346	0.307806	0.511722		4.7	2	2	0.78604	0.931359	-0.0308829	0.12677	2	7.7	3	3	1.4418	1.636	0.213783	38.215	3	13.7	6	6	0.85921	0.91834	-0.0369965	10.86	9
	314	Tb927.10.11150	Tb927.10.11150		hypothetical protein, conserved	25.436	13.7	0	3.1432	1		0.856035	-0.0675082	0.629478	0.201019		0	0	0	NaN	NaN		NaN	0	8.8	1	1	0.52305	0.59674	-0.224215	NaN	1	4.9	1	1	1.1437	1.228	0.0891984	NaN	1
	637	Tb927.10.8320	Tb927.10.8320	COXIX	cytochrome oxidase subunit IX (COXIX)	13.786	13.7	0	16.157	1	1	1.06195	0.0261057	0.212337	0.672974		13.7	1	1	0.794344	0.948497	-0.0229642	NaN	1	13.7	1	1	1.0378	1.1662	0.066773	14.597	2	13.7	1	1	0.99769	1.0827	0.0345081	NaN	1
	1689	Tb927.6.5000	Tb927.6.5000		hypothetical protein, conserved	44.275	13.7	0	18.236	1		0.964499	-0.0156982	0.616902	0.209784		5.6	2	2	0.992063	1.19292	0.076611	13.958	2	13.7	4	4	0.77005	0.86996	-0.0605007	5.2234	4	10.7	3	3	0.79883	0.86456	-0.0632049	17.609	3
	273	Tb927.1.5030	Tb927.1.5030		leucine-rich repeat protein (LRRP), putative	80.773	13.7	0	53.607	1		0.825633	-0.083213	0.832719	0.0795014		10.5	4	4	0.844666	0.997407	-0.00112768	18.157	5	3.4	2	2	0.54081	0.61124	-0.213788	87.436	2	5.4	3	3	0.84587	0.92316	-0.034723	10.625	3
	1851	Tb927.7.5990;Tb927.7.5970	Tb927.7.5990;Tb927.7.5970	PAD5;PAD7	protein associated with differentiation 7, putative;protein associated with differentiation 5, putative	65.42	13.7	0	6.1151	2		0.69856	-0.155796				7.9	5	0	NaN	NaN		NaN	0	8	5	0	NaN	NaN		NaN	0	9.7	4	1	0.63696	0.69856	-0.155796	NaN	1
	1114	Tb927.11.940	Tb927.11.940	KREPB5	KREPB5 (KREPB5)	43.464	13.6	0	11.139	1	1	1.65419	0.218584	0.265265	0.57632		8.9	3	3	2.43564	2.87878	0.459208	151.95	2	0	0	0	NaN	NaN		NaN	0	7.3	3	3	0.86223	0.95052	-0.0220387	17.845	2
	830	Tb927.11.14980	Tb927.11.14980		hypothetical protein, conserved	58.419	13.6	0	13.694	1	1	1.15479	0.0625018	0.190447	0.720227		2.6	1	1	1.07602	1.2878	0.109847	NaN	1	5.1	2	2	1.1879	1.3392	0.126845	43.739	2	11	4	4	0.83027	0.89292	-0.0491874	21.686	4
	1186	Tb927.2.4710	Tb927.2.4710	TRRM1	RNA-binding protein, putative (TRRM1)	49.983	13.6	0	36.605	1		1.13216	0.053906	0.177263	0.751381		6.6	1	1	0.884017	1.06285	0.0264703	NaN	1	13.6	3	3	0.87376	0.98447	-0.00679751	7.2303	2	9.8	2	2	1.2745	1.3869	0.142045	NaN	1
	1745	Tb927.7.2240	Tb927.7.2240		hypothetical protein, conserved	59.665	13.6	0	13.983	1		1.10556	0.0435819	0.171734	0.765143		4.2	2	2	1.0689	1.27846	0.106688	16.546	2	10.3	4	4	0.84422	0.96429	-0.0157923	4.0573	4	8.6	4	4	1.0255	1.0961	0.0398502	8.2377	4
	1784	Tb927.7.3460	Tb927.7.3460		hypothetical protein, conserved	50.252	13.6	0	15.766	1	1	0.971431	-0.0125881	0.579457	0.236979		13.6	5	5	0.682734	0.783945	-0.105715	16.045	5	6.2	2	2	0.84716	0.96007	-0.0176971	10.029	2	11.6	4	4	1.1289	1.218	0.0856473	12.901	4
	1383	Tb927.4.2300	Tb927.4.2300		hypothetical protein, conserved	80.56	13.6	0	58.767	1		0.730692	-0.136266	0.887224	0.051967		3.7	2	2	0.715871	0.841751	-0.0748164	5.535	2	1.6	1	1	0.4558	0.50991	-0.292506	NaN	1	10.3	5	5	0.83995	0.90892	-0.0414743	21.751	5
	1834	Tb927.7.5520	Tb927.7.5520		hypothetical protein, conserved	22.366	13.6	0	10.219	1		0.850672	-0.0702378	0.989712	0.00449131		7.3	1	1	0.685354	0.822301	-0.0849693	NaN	1	7.3	1	1	0.74442	0.84105	-0.0751782	NaN	1	13.6	2	2	0.82124	0.89009	-0.0505661	NaN	1
	2282	Tb927.9.7060	Tb927.9.7060		hypothetical protein, conserved	32.799	13.5	0	17.13	1		1.31589	0.11922	0.214817	0.667932		10.1	2	2	0.876732	1.04682	0.0198737	9.9287	2	6.1	1	1	0.83755	0.94847	-0.0229764	NaN	1	7.4	2	2	2.1238	2.2949	0.360764	216.23	2
	2079	Tb927.8.7560	Tb927.8.7560		hypothetical protein, conserved	63.058	13.5	0	82.71	1		1.08033	0.033558	0.242679	0.614968		9.8	4	4	0.966184	1.1319	0.0538081	5.5021	4	6.7	3	3	0.79325	0.90624	-0.0427568	25.031	3	11.5	5	5	1.1378	1.2292	0.0896226	38.272	4
	2046	Tb927.8.6380	Tb927.8.6380		hypothetical protein, conserved	29.908	13.5	0	11.632	1		1.00474	0.00205412	0.491655	0.30834		3	1	1	0.581024	0.683714	-0.165126	NaN	1	3	1	1	1.1907	1.3412	0.127494	NaN	1	13.5	3	3	1.0202	1.1061	0.0437944	10.836	3
	921	Tb927.11.2580	Tb927.11.2580		hypothetical protein, conserved	41.554	13.5	0	20.208	1		1.08854	0.0368439	0.167148	0.7769		13	3	3	1.04452	1.2437	0.094717	18.823	2	7.8	4	4	0.91961	1.0345	0.0147305	1.3732	3	8.8	2	2	0.93343	1.0025	0.00108438	NaN	1
	2006	Tb927.8.5220	Tb927.8.5220		hypothetical protein, conserved	114.05	13.5	0	54.178	1	1	0.951517	-0.0215833	0.706774	0.15072		6.7	5	5	0.733837	0.870701	-0.060131	20.147	5	6.9	6	6	0.78505	0.89129	-0.049981	15.435	6	8.1	5	5	1.0386	1.1101	0.0453621	22.698	5
	2060	Tb927.8.6760;Tb927.8.6750	Tb927.8.6760;Tb927.8.6750		IgE-dependent histamine-releasing factor, putative;translationally controlled tumor protein (TCTP), putative	19.35	13.5	0.00097371	2.8043	2		0.802637	-0.0954811	0.848912	0.0711375		6.5	1	1	0.603865	0.716897	-0.144543	NaN	1	7.1	1	1	0.79803	0.89863	-0.0464191	NaN	1	0	0	0	NaN	NaN		NaN	0
	960	Tb927.11.3920	Tb927.11.3920		hypothetical protein, conserved	74.746	13.5	0	43.797	1		0.989826	-0.00444132	0.565884	0.247273		5.6	3	3	0.833333	0.993246	-0.00294322	4.2643	3	7.2	3	3	0.79839	0.89931	-0.0460906	10.38	3	10.2	6	6	1.0127	1.0857	0.0357098	53.293	6
	362	Tb927.10.12900	Tb927.10.12900		hypothetical protein, conserved	18.063	13.5	0	13.364	1	1	0.8569	-0.0670701	0.808147	0.0925095		9	1	1	0.859697	1.02399	0.0102966	NaN	1	9	1	1	0.5762	0.6508	-0.186552	NaN	1	13.5	2	2	0.88203	0.94416	-0.0249544	12.165	4
	1026	Tb927.11.6040	Tb927.11.6040		hypothetical protein, conserved	70.825	13.5	0	23.735	1		0.972686	-0.0120275	0.704119	0.152354		11.4	5	5	0.754205	0.891981	-0.0496443	22.129	5	11.2	5	5	0.90763	1.0272	0.011655	35.326	5	13.5	6	6	0.92942	1.0044	0.0019067	11.133	6
	854	Tb927.11.15850	Tb927.11.15850		kinteoplast poly(A) polymerase complex 1 subunit	86.756	13.5	0	27.586	1	1	0.992919	-0.00308623	0.590323	0.22891		6.4	3	3	0.841751	1.01306	0.00563431	44.773	3	7.7	4	4	0.83215	0.94061	-0.0265904	7.7963	4	12.2	7	7	0.94743	1.0273	0.0116973	8.2368	7
	632	Tb927.10.8180	Tb927.10.8180		hypothetical protein, conserved	128.52	13.4	0	57.752	1		1.10094	0.0417649	0.159486	0.797277		9.1	8	8	0.804764	0.961538	-0.0170333	11.602	9	11.1	9	9	0.99426	1.123	0.0503798	31.989	9	7.6	7	7	1.1482	1.2358	0.0919482	17.161	7
	2055	Tb927.8.6530	Tb927.8.6530		hypothetical protein, conserved	41.897	13.4	0	38.493	1	1	1.06212	0.0261748	0.237258	0.624779		13.4	4	4	0.781006	0.925926	-0.0334238	42.385	4	8.1	2	2	1.0041	1.1233	0.0504958	36.288	2	9.9	3	3	1.0617	1.152	0.0614525	14.619	4
	1367	Tb927.4.1610	Tb927.4.1610	TAC40	hypothetical protein, conserved	39.631	13.4	0	9.6155	1	1	0.8611	-0.0649462	0.742152	0.129507		3.9	1	1	0.540365	0.612895	-0.212614	NaN	1	9.2	3	3	1.0501	1.1869	0.0744141	36.013	3	7.8	2	2	0.82067	0.87773	-0.0566391	11.112	2
	1956	Tb927.8.2990	Tb927.8.2990		hypothetical protein, conserved	35.687	13.4	0	18.134	1		0.9603	-0.0175929	0.632534	0.198916		9.1	2	2	0.953471	1.14227	0.0577688	33.998	2	9.1	2	2	0.71463	0.79675	-0.0986779	16.728	2	13.4	3	3	0.89633	0.97304	-0.0118693	18.854	3
	1959	Tb927.8.3140	Tb927.8.3140		NAD dependent deacetylase, putative,SIR2-like protein 4, putative,NAD-dependent deacetylase sirtuin 4, putative	33.545	13.4	0	4.9662	1		0.953147	-0.02084	0.708812	0.149469		13.4	2	2	0.824063	0.972573	-0.0120776	36.874	2	6.9	1	1	0.9498	1.071	0.0297895	NaN	1	6.5	1	1	0.75928	0.83132	-0.0802318	NaN	1
	1538	Tb927.5.3710	Tb927.5.3710	TbnSMase	essential neutral sphingomyelinase (TbnSMase)	65.019	13.4	0	36.81	1		0.933018	-0.0301097	0.886236	0.0524505		4.5	2	2	0.760919	0.901063	-0.0452447	5.7118	2	8.8	3	3	0.89182	1.0111	0.00479411	6.515	3	10.9	4	4	0.82907	0.8915	-0.0498787	3.0971	4
	754	Tb927.11.12500	Tb927.11.12500		hypothetical protein, conserved	38.051	13.4	0	9.4337	1		1.3189	0.120212				0	0	0	NaN	NaN		NaN	0	8.5	2	2	1.1658	1.3189	0.120212	27.992	3	4.8	1	1	NaN	NaN		NaN	0
	771	Tb927.11.1320	Tb927.11.1320	NDHK	NADH-ubiquinone oxidoreductase 20 kDa subunit, mitochondrial precursor,NDUFS7 subunit (NDHK)	23.077	13.4	0	7.0944	1	1	1.0579	0.0244446				0	0	0	NaN	NaN		NaN	0	13.4	1	1	0.93445	1.0579	0.0244446	NaN	1	0	0	0	NaN	NaN		NaN	0
	473	Tb927.10.2440	Tb927.10.2440	MCA4	metacaspase MCA4,cysteine peptidase, Clan CD, family C13, putative (MCA4)	38.969	13.3	0	14.162	1		1.11366	0.0467541	0.248282	0.605055		4	1	1	0.806842	0.958773	-0.0182843	NaN	1	13.3	3	3	0.89279	0.9971	-0.00126128	28.185	3	7.1	2	2	1.3495	1.4448	0.159808	46.483	2
	1982	Tb927.8.4150	Tb927.8.4150	TimRhom II	hypothetical protein, conserved	33.246	13.3	0	7.7763	1	1	1.09609	0.0398478	0.085867	1.06617		12	2	2	0.886132	1.05181	0.0219381	1.8694	2	13.3	3	3	0.93375	1.0463	0.0196562	23.626	3	7	1	1	1.1106	1.1966	0.077949	NaN	1
	1652	Tb927.6.4030	Tb927.6.4030		superoxide dismutase, putative	29.652	13.3	0	5.1855	1	1	0.935713	-0.0288575	0.645457	0.190133		4.6	1	1	0.90703	1.07111	0.0298345	NaN	1	0	0	0	NaN	NaN		NaN	0	8.7	2	2	0.75959	0.81743	-0.0875494	49.327	2
	1697	Tb927.6.580	Tb927.6.580		hypothetical protein, conserved	66.692	13.3	0	12.957	1		1.03141	0.0134309	0.232143	0.634244		5.5	2	2	0.829256	0.979528	-0.00898323	0.34276	2	2.2	1	1	0.90324	1.0173	0.00744904	9.7832	2	13.3	4	4	1.0033	1.1011	0.0418268	19.463	3
	2038	Tb927.9.14370;Tb927.8.6180	Tb927.9.14370;Tb927.8.6180		60S ribosomal protein L26, putative;60S ribosomal protein L26, putative	16.454	13.3	0	3.2555	2		1.02107	0.009057	0.390367	0.408527		13.3	1	1	0.866176	1.03035	0.0129865	NaN	1	13.3	1	1	1.007	1.1385	0.056333	NaN	1	13.3	1	1	0.84748	0.90751	-0.0421486	NaN	1
	1917	Tb927.8.1720	Tb927.8.1720	pgps	phosphatidylglycerophosphate synthase, putative	68.119	13.3	0	27.795	1		0.860883	-0.0650561	0.768656	0.114268		4.7	3	3	0.966184	1.15899	0.0640797	21.598	3	11.9	6	6	0.75587	0.84403	-0.0736421	4.5918	8	4.7	2	2	0.60322	0.65222	-0.185606	28.378	2
	1488	Tb927.5.1760	Tb927.5.1760		hypothetical protein, conserved	72.635	13.3	0	75.203	1		0.952759	-0.0210171	0.721705	0.14164		8.6	4	4	0.733084	0.871612	-0.059677	22.233	4	7.3	3	3	0.97816	1.0918	0.0381431	19.342	3	7.9	4	4	0.83525	0.90883	-0.0415173	8.7324	4
	271	Tb927.1.4690	Tb927.1.4690	PRMT1	arginine N-methyltransferase (PRMT1)	39.206	13.3	0	22.195	1		0.984176	-0.00692708	0.583739	0.233782		9.3	2	2	0.927558	1.09645	0.0399908	11.666	2	4.1	1	1	0.78248	0.87212	-0.0594238	NaN	1	9.3	2	2	0.93482	0.9969	-0.0013484	18.01	3
	2331	Tb927.9.9720	Tb927.9.9720		hypothetical protein, conserved	25.447	13.3	0	29.298	1		0.947239	-0.0235403	0.765932	0.11581		5.3	1	1	0.888968	1.03205	0.0136986	NaN	1	8	1	1	0.74941	0.84173	-0.0748272	NaN	1	5.3	1	1	0.91019	0.97838	-0.00949243	NaN	1
	100	Tb927.5.4420;Tb05.5K5.70	Tb927.5.4420;Tb05.5K5.70		nucleolar RNA helicase II, putative,nucleolar RNA helicase Gu, putative;nucleolar RNA helicase II, putative,nucleolar RNA helicase Gu, putative,BAC from homologous region on chr5	68.786	13.3	0	37.867	2		0.954572	-0.0201914	0.858735	0.0661409		8.9	4	4	0.849473	1.00926	0.00400091	26.165	5	6.8	4	4	0.79316	0.90362	-0.0440142	18.058	4	11.9	6	6	0.89257	0.95376	-0.0205609	6.5562	6
	2293	Tb927.9.7550	Tb927.9.7550	ADSL	adenylosuccinate lyase, putative (ASL)	53.119	13.2	0	11.68	1		1.08123	0.0339189	0.294188	0.531375		0	0	0	NaN	NaN		NaN	0	5.5	1	1	1.0596	1.1991	0.0788554	NaN	1	13.2	4	4	0.91998	0.97495	-0.0110177	7.6431	4
	1749	Tb927.7.2390	Tb927.7.2390		hypothetical protein, conserved	102.86	13.2	0	26.601	1		0.984865	-0.00662311	0.804421	0.0945168		3.7	2	2	0.892618	1.0062	0.00268345	11.684	3	10.3	5	5	0.85086	0.95915	-0.0181135	26.156	6	4.6	3	3	0.91846	0.98983	-0.00443939	16.954	4
	809	Tb927.11.14190	Tb927.11.14190		hypothetical protein, conserved	100.47	13.2	0	45.45	1		0.937001	-0.02826	0.970699	0.0129153		7.3	5	5	0.800256	0.92773	-0.0325785	37.454	5	6.6	4	4	0.81812	0.91638	-0.0379244	42.259	4	10.7	9	9	0.87613	0.96766	-0.0142772	24.43	8
	367	Tb927.10.12970	Tb927.10.12970		hypothetical protein, conserved	33.08	13.2	0	3.6063	1		0.97394	-0.0114678				0	0	0	NaN	NaN		NaN	0	13.2	2	2	0.86549	0.97394	-0.0114678	11.544	2	0	0	0	NaN	NaN		NaN	0
	1408	Tb927.4.3480	Tb927.4.3480		hypothetical protein	19.994	13.1	0	14.037	1		1.23507	0.091693	0.304384	0.516579		13.1	2	2	0.645953	0.773276	-0.111666	18.97	2	13.1	2	2	2.1823	2.4562	0.390264	107.83	2	13.1	2	2	0.91634	0.99193	-0.00351897	0.61817	2
	2323	Tb927.9.9420	Tb927.9.9420		hypothetical protein, conserved	34.928	13.1	0	52.96	1	1	1.1163	0.0477795	0.269373	0.569646		7.1	2	2	1.24934	1.50575	0.177753	37.958	2	10.3	2	2	0.85962	0.96315	-0.0163061	33.556	4	6.1	1	1	0.88796	0.95916	-0.0181089	2.9147	2
	623	Tb927.10.8010	Tb927.10.8010		hypothetical protein, conserved	28.355	13.1	0	15.65	1	1	1.05393	0.0228112	0.417739	0.379095		13.1	2	2	0.729714	0.864005	-0.0634835	7.0196	3	0	0	0	NaN	NaN		NaN	0	7.4	1	1	1.1956	1.2856	0.109106	NaN	1
	1240	Tb927.3.2080	Tb927.3.2080		hypothetical protein, conserved	30.66	13.1	0	8.6933	1	1	1.04738	0.0201041	0.102414	0.989639		10.4	2	2	0.841114	1.00811	0.00350577	5.6935	2	6.5	1	1	0.97482	1.0977	0.0404837	NaN	1	13.1	3	3	0.96499	1.0383	0.0163229	4.6678	2
	2143	Tb927.9.12400	Tb927.9.12400		protein kinase, putative	148.15	13.1	0	36.585	1		1.01522	0.00656212	0.324733	0.488474		6.5	5	5	0.821693	0.960338	-0.0175759	1.6156	5	3.3	3	3	0.91927	1.0321	0.0137218	69.419	3	9.3	9	9	0.97801	1.0557	0.0235405	17.82	9
	1492	Tb927.5.1820	Tb927.5.1820		60S acidic ribosomal protein, putative	10.132	13.1	0	3.9452	1		0.997757	-0.000975087	0.526255	0.278804		13.1	1	1	0.79466	0.950661	-0.0219745	NaN	1	13.1	1	1	0.93983	1.0547	0.0231289	NaN	1	13.1	1	1	0.92536	0.99065	-0.00407976	NaN	1
	1550	Tb927.5.4120	Tb927.5.4120		hypothetical protein, conserved	22.32	13.1	0	4.126	1	1	0.977633	-0.00982415	0.746914	0.126729		4.2	1	1	0.824063	0.985028	-0.0065516	NaN	1	8.9	2	2	0.83029	0.92799	-0.0324567	6.9306	2	13.1	3	3	0.94343	1.0222	0.00953588	7.519	3
	2066	Tb927.8.6960;Tb04.24M18.150	Tb927.8.6960;Tb04.24M18.150		hypothetical protein, conserved;hypothetical protein, conserved	42.527	13	0	14.791	2	1	0.943198	-0.0253969	0.604964	0.21827		5.7	2	2	0.550176	0.652273	-0.18557	57.188	2	5.7	2	2	1.0966	1.2487	0.0964581	29.539	2	13	4	4	0.95797	1.0302	0.0129215	16.701	4
	1627	Tb927.6.2890	Tb927.6.2890		single strand-specific nuclease, putative	31.362	13	0	12.529	1		0.911668	-0.0401631	0.72454	0.139938		13	2	2	0.690369	0.825696	-0.08318	NaN	1	8.7	1	1	0.68712	0.77776	-0.109154	NaN	1	13	2	2	1.0901	1.1799	0.0718452	7.8803	2
	744	Tb927.11.11950	Tb927.11.11950		cytochrome oxidase assembly protein, putative	43.527	13	0	6.5683	1	1	0.834487	-0.0785806	0.805231	0.0940798		5.6	2	2	0.812612	0.963577	-0.0161136	26.208	2	7.4	2	2	0.88529	1.0063	0.00272747	8.8853	2	2	1	1	0.5604	0.5993	-0.222356	NaN	1
	1928	Tb927.8.2000	Tb927.8.2000	NCP1	cyclophilin, putative (NCP1)	28.482	13	0	10.544	1		0.946933	-0.0236809	0.951605	0.0215433		5	1	1	0.83696	0.9758	-0.0106391	NaN	1	9.5	2	2	0.80759	0.91601	-0.0380998	18.131	2	13	3	3	0.89286	0.94994	-0.0223038	24.401	3
	1597	Tb927.6.1960	Tb927.6.1960		glycosyltransferase family 28 protein, putative	45.904	13	0	8.239	1		0.91993	-0.0362451	0.995647	0.00189455		4.1	2	2	0.787712	0.9298	-0.0316104	2.1097	2	8.9	3	3	0.82066	0.92418	-0.0342434	1.1821	2	4.1	2	2	0.84145	0.90598	-0.0428814	14.034	2
	793	Tb927.11.13800	Tb927.11.13800		hypothetical protein, conserved	12.38	13	0	3.2468	1			NaN				0	0	0	NaN	NaN		NaN	0	0	0	0	NaN	NaN		NaN	0	13	1	1	NaN	NaN		NaN	0
	1262	Tb927.3.2860	Tb927.3.2860		hypothetical protein, conserved	34.04	13	0	4.0888	1		1.00747	0.00323012				13	2	2	0.858369	1.00747	0.00322997	8.6043	2	0	0	0	NaN	NaN		NaN	0	0	0	0	NaN	NaN		NaN	0
	2075	Tb927.8.740;Tb927.8.760	Tb927.8.740;Tb927.8.760	Nopp44/46	nucleolar RNA-binding protein, truncated;nucleolar RNA-binding protein (Nopp44/46)	12.663	12.9	0	4.2604	2		1.07682	0.0321436	0.222669	0.65234		7.2	1	1	0.834724	0.994629	-0.00233884	NaN	1	7.2	1	1	1.1211	1.2599	0.100336	NaN	1	12.9	2	2	0.92478	0.9964	-0.00156628	4.7928	2
	1401	Tb927.4.2930	Tb927.4.2930		hypothetical protein, conserved	29.306	12.9	0	45.062	1		0.329053	-0.482735	0.786071	0.104538		3	1	1	0.11284	0.135888	-0.866819	NaN	1	3.7	1	1	NaN	NaN		NaN	0	6.3	1	1	0.73619	0.7968	-0.0986507	NaN	1
	394	Tb927.10.14030	Tb927.10.14030		hypothetical protein, conserved	50.474	12.9	0	11.177	1		1.03102	0.0132679	0.265705	0.5756		8.2	3	3	0.827198	0.982704	-0.00757714	7.5276	3	10.7	4	4	0.99126	1.118	0.0484418	16.393	4	12.9	5	5	0.92397	0.99756	-0.00106097	11.504	5
	305	Tb927.10.10820	Tb927.10.10820		hypothetical protein, conserved	36.965	12.9	0	25.548	1		0.833264	-0.0792176	0.920707	0.0358786		3	1	1	0.669523	0.795482	-0.0993698	NaN	1	0	0	0	NaN	NaN		NaN	0	12.9	3	3	0.80852	0.87284	-0.0590654	6.1004	3
	1770	Tb927.7.3140	Tb927.7.3140		hypothetical protein, conserved	20.963	12.9	0	4.4106	1	1	1.5944	0.202597				0	0	0	NaN	NaN		NaN	0	0	0	0	NaN	NaN		NaN	0	12.9	2	2	1.4658	1.5944	0.202597	1.4653	2
	1819	Tb927.7.4710	Tb927.7.4710		hypothetical protein, conserved	33.994	12.8	0	6.4837	1	1	1.64884	0.217179	0.0671898	1.1727		6.8	1	1	1.54636	1.83533	0.263715	NaN	1	6.1	2	2	1.3138	1.4813	0.170643	42.034	2	0	0	0	NaN	NaN		NaN	0
	1671	Tb927.6.4370	Tb927.6.4370		eukaryotic translation initiation factor 3 subunit 7-like protein	57.974	12.8	0	11.386	1		1.1211	0.0496457	0.379439	0.420858		2.4	1	1	1.75202	2.07719	0.317476	NaN	1	4.3	2	2	0.60963	0.68814	-0.162323	NaN	1	8.5	4	4	0.91022	0.98579	-0.00621559	14.366	4
	1120	Tb927.11.9570	Tb927.11.9570		hypothetical protein, conserved	32.962	12.8	0	4.7097	1	1	1.02975	0.0127336	0.434803	0.361707		9.4	2	2	0.769112	0.90465	-0.0435195	29.944	2	3	1	1	0.76358	0.85654	-0.0672524	NaN	1	9.7	2	2	1.2995	1.4092	0.148973	36.205	2
	615	Tb927.10.7580	Tb927.10.7580		hypothetical protein, conserved	111.59	12.8	0	24.505	1		1.04149	0.0176536	0.318986	0.496229		5.6	4	4	1.02789	1.20739	0.081849	23.335	5	7.1	5	5	0.85158	0.96082	-0.017358	23.833	6	11.3	8	8	0.9001	0.9738	-0.0115302	14.75	7
	826	Tb927.11.14910	Tb927.11.14910		protein phosphatase 2C, putative	47.124	12.8	0	12.758	1		0.954052	-0.0204281	0.705483	0.151514		10.7	2	2	0.706215	0.84317	-0.0740847	10.801	3	10.7	2	2	0.83291	0.94635	-0.0239482	44.328	2	12.8	3	3	1.0011	1.0883	0.0367486	14.351	3
	1023	Tb927.11.5990	Tb927.11.5990		hypothetical protein, conserved	69.307	12.8	0	13.657	1	1	0.941559	-0.0261523	0.754684	0.122235		8.1	4	4	0.764994	0.909091	-0.0413927	20.545	4	6	3	3	0.74989	0.84916	-0.0710105	19.993	2	4.5	3	3	0.9952	1.0813	0.0339462	17.069	3
	1125	Tb927.11.9640	Tb927.11.9640	GlyRS	glycyl-tRNA synthetase, putative	70.175	12.8	0	19.573	1		1.03859	0.0164427	0.226369	0.645183		10.7	6	6	0.913242	1.08158	0.0340603	16.376	6	10.7	6	6	0.84991	0.95693	-0.0191198	12.611	6	10.6	5	5	0.96953	1.0824	0.0343878	22.276	5
	1328	Tb927.3.5340	Tb927.3.5340		Hsc70-interacting protein (Hip), putative	42.028	12.8	0	16.512	1		0.930108	-0.0314666	0.86873	0.0611151		12.8	3	3	0.712911	0.847027	-0.0721028	13.662	4	7.3	2	2	0.85914	0.96863	-0.0138421	16.078	2	8.9	3	3	0.90459	0.98072	-0.00845497	23.352	3
	1589	Tb927.6.1680	Tb927.6.1680	MRB1680	mitochondrial RNA binding protein 1 (MRB1680)	58.05	12.8	0	7.1433	1	1	0.967333	-0.0144239	0.952681	0.0210527		6.5	3	3	0.835771	0.982801	-0.00753441	3.158	3	7.8	4	4	0.85664	0.97248	-0.0121193	14.033	3	3.4	2	2	0.8705	0.94707	-0.0236179	10.875	2
	1048	Tb927.11.6640	Tb927.11.6640	CYB5	cytochrome b5, putative (CYB5)	14.754	12.8	0.0013993	2.3462	1		1.05232	0.0221484				12.8	1	1	0.885661	1.05232	0.0221482	NaN	1	0	0	0	NaN	NaN		NaN	0	0	0	0	NaN	NaN		NaN	0
	1743	Tb927.7.2200	Tb927.7.2200	Tim 9	hypothetical protein, conserved	8.8073	12.8	0	3.1213	1	1	0.99022	-0.0042683				12.8	1	1	NaN	NaN		NaN	0	0	0	0	NaN	NaN		NaN	0	12.8	1	1	0.91583	0.99022	-0.00426831	NaN	1
	2251	Tb927.9.5150	Tb927.9.5150	NHP2	ribosomal protein S6, putative,NHP2/RS6-like protein (NHP2)	13.572	12.7	0	11.222	1		1.26858	0.103317	0.251887	0.598794		12.7	1	1	0.77688	0.90967	-0.0411162	17.502	2	12.7	1	1	2.0256	2.2814	0.358201	21.931	2	12.7	1	1	0.92405	0.98371	-0.00713291	0.63191	2
	2179	Tb927.9.14100	Tb927.9.14100		hypothetical protein, conserved	34.916	12.7	0	11.597	1		1.05732	0.0242058	0.362079	0.441196		4.1	1	1	1.15284	1.38485	0.141403	NaN	1	12.7	3	3	0.8662	0.96573	-0.0151443	9.9913	3	8.3	2	2	0.81772	0.88381	-0.0536411	11.209	3
	1575	Tb927.6.990;Tb927.6.1060;Tb927.6.1050;Tb927.6.1000;Tb927.6.980;Tb927.6.970;Tb927.6.960;Tb927.6.1020;Tb927.6.1010	Tb927.6.990;Tb927.6.1060;Tb927.6.1050;Tb927.6.1000;Tb927.6.980;Tb927.6.970;Tb927.6.960;Tb927.6.1020;Tb927.6.1010	CP;CP;Rhodesain;CP;CP;CP;CP;CP;CP	cysteine peptidase precursor,cysteine peptidase, Clan CA, family C1, Cathepsin L-like (CP);cysteine peptidase precursor,cysteine peptidase, Clan CA, family C1, Cathepsin L-like (CP);cysteine peptidase precursor,cysteine peptidase, Clan CA, family C1, Cat	48.324	12.7	0	6.4195	9		1.03778	0.0161047	0.187049	0.728044		6.5	2	1	0.823316	0.986777	-0.00578089	NaN	1	8.2	3	1	0.92004	1.0266	0.0114013	NaN	1	12.7	4	1	1.0287	1.1033	0.0426936	NaN	1
	1695	Tb927.6.5140	Tb927.6.5140		ribosomal P protein AGP2beta-1, putative	24.983	12.7	0	4.675	1	1	0.964064	-0.0158942	0.586691	0.231591		12.7	2	2	0.924385	1.09905	0.0410159	13.104	2	0	0	0	NaN	NaN		NaN	0	12.7	2	2	0.77022	0.84566	-0.0728042	25.648	2
	1576	Tb927.6.1040;Tb927.6.1030	Tb927.6.1040;Tb927.6.1030	CP;CP	cysteine peptidase precursor,cysteine peptidase, Clan CA, family C1, Cathepsin L-like (CP);cysteine peptidase precursor,cysteine peptidase, Clan CA, family C1, Cathepsin L-like (CP)	48.358	12.7	0	33.086	2		1.0467	0.0198204	0.108312	0.965324		6.5	2	1	0.831255	0.994629	-0.00233884	NaN	1	8.2	3	1	0.95342	1.0697	0.029262	NaN	1	12.7	4	1	1.0051	1.0778	0.0325382	NaN	1
	365	Tb927.10.12940	Tb927.10.12940		predicted zinc finger protein	34.477	12.7	0	5.453	1		0.954627	-0.0201663	0.784843	0.105217		12.7	2	2	0.790014	0.934056	-0.0296273	NaN	1	12.7	2	2	0.79113	0.89102	-0.0501125	5.4713	2	9.9	1	1	0.9775	1.0453	0.019241	NaN	1
	836	Tb927.11.15230	Tb927.11.15230		cytosolic coat protein, putative	25.564	12.7	0	17.535	1		1.00688	0.00297786	0.40414	0.393468		12.7	3	3	0.819941	0.983478	-0.00723557	5.5969	3	12.7	3	3	0.87677	0.98094	-0.00835756	3.0553	3	8.8	2	2	0.97518	1.0581	0.0245267	2.2021	2
	955	Tb927.11.3750	Tb927.11.3750	B5R	NADH-cytochrome b5 reductase, putative (B5R)	34.091	12.7	0	21.467	1		0.923439	-0.0345916	0.931539	0.030799		10.1	3	3	0.725953	0.872068	-0.0594498	22.666	3	9.8	3	3	0.8162	0.92372	-0.0344597	17.13	3	10.1	3	3	0.90644	0.97754	-0.00986546	39.962	3
	1368	Tb927.4.1660	Tb927.4.1660	MCP6	mitochondrial carrier protein, putative (MCP6)	42.163	12.7	0	3.8181	1	1	0.927314	-0.0327731	0.799513	0.0971747		2.6	1	1	0.919625	1.06945	0.0291605	NaN	1	6.8	2	2	0.77219	0.86628	-0.0623417	23.916	2	8.6	2	2	0.79686	0.86072	-0.0651381	19.526	2
	2277	Tb927.9.6650	Tb927.9.6650		hypothetical protein, conserved	52.057	12.6	0	21.435	1		0.985705	-0.00625282	0.671583	0.1729		10.3	4	4	0.812876	0.976753	-0.0102152	16.206	4	5.1	2	2	0.83751	0.94417	-0.0249498	10.44	2	8.8	4	4	0.95854	1.0385	0.0164065	11.004	4
	2077	Tb927.8.750	Tb927.8.750		nucleolar RNA-binding protein, putative	39.761	12.6	0	9.9708	1		1.03952	0.0168317	0.110205	0.957797		6.3	2	2	0.867679	1.04248	0.0180681	30.225	2	6.3	2	2	0.95426	1.0783	0.0327396	16.749	2	12.6	3	3	0.92222	0.99928	-0.000312805	39.212	3
	1148	Tb927.2.1810	Tb927.2.1810	ISWI	transcription silencer (ISWI)	132.76	12.6	0	29.335	1		0.933719	-0.0297838	0.844139	0.073586		7.2	6	6	0.880902	1.0314	0.0134254	30.801	6	5.8	5	5	0.77337	0.87053	-0.0602163	16.814	4	7	5	5	0.8306	0.90665	-0.0425603	9.3057	5
	2223	Tb927.9.3100	Tb927.9.3100		hypothetical protein, conserved	44.117	12.5	0	14.565	1		1.06846	0.0287566	0.32201	0.492131		12.5	3	3	1.00731	1.18771	0.0747086	15.787	2	0	0	0	NaN	NaN		NaN	0	5.2	1	1	0.88972	0.96118	-0.0171953	NaN	1
	1588	Tb927.6.1640;Tb927.6.1650	Tb927.6.1640;Tb927.6.1650		single strand-specific nuclease, putative;single strand-specific nuclease, putative	33.134	12.5	0	7.4779	2		1.0536	0.0226738	0.361951	0.44135		3.4	1	1	0.959509	1.15567	0.0628331	NaN	1	6.8	2	2	1.0898	1.2382	0.0927908	NaN	1	9.1	2	2	0.74959	0.81733	-0.0876026	5.3867	2
	1840	Tb927.7.5700	Tb927.7.5700		hypothetical protein, conserved	35.717	12.5	0	9.526	1		1.05549	0.0234534	0.24344	0.613607		2.8	1	1	0.928678	1.08253	0.0344407	NaN	1	12.5	3	3	0.83747	0.93511	-0.0291373	18.264	3	8.8	2	2	1.0786	1.1616	0.0650566	22.643	2
	831	Tb927.11.15020	Tb927.11.15020	TbSODB	iron superoxide dismutase (TbSODB)	23.28	12.5	0	3.3303	1		1.06315	0.0265926	0.0523312	1.28124		8.2	1	1	NaN	NaN		NaN	0	8.2	1	1	0.94737	1.074	0.0310043	4.7396	2	12.5	2	1	0.98819	1.0524	0.0221808	NaN	1
	910	Tb927.11.2330	Tb927.11.2330		molybdopterin synthase sulphurylase protein, putative	54.862	12.5	0	5.6434	1		1.03023	0.0129349	0.305263	0.515326		1.6	1	1	0.805607	0.935979	-0.0287339	NaN	1	10.9	2	2	0.93091	1.0561	0.023705	NaN	1	1.6	1	1	1.0249	1.1062	0.0438337	NaN	1
	814	Tb927.11.1440	Tb927.11.1440		hypothetical protein, conserved	19.118	12.5	0	6.8527	1		0.977845	-0.00973014	0.738879	0.131427		6	1	1	0.828912	0.988631	-0.00496586	NaN	1	12.5	2	2	0.81378	0.92548	-0.033633	22.003	2	12.5	2	2	0.93425	1.0219	0.0094084	3.9077	2
	2230	Tb927.9.3470	Tb927.9.3470		low molecular weight protein tyrosine phosphatase, putative	30.489	12.5	0	9.6332	1	1	0.994769	-0.00227773	0.586741	0.231554		12.5	3	3	0.856164	1.0318	0.0135955	0.32968	2	9.5	2	2	0.85521	0.95923	-0.0180772	3.4638	2	9.5	2	2	0.92419	0.9946	-0.00235155	5.3598	2
	2022	Tb927.8.5680	Tb927.8.5680		hypothetical protein, conserved	66.873	12.5	0	43.129	1	1	0.96142	-0.017087	0.856946	0.0670466		5.6	2	2	0.854482	1.00894	0.00386491	6.9627	3	8.6	3	3	0.83586	0.95948	-0.0179641	17.532	3	12.5	8	8	0.85781	0.91799	-0.037162	19.125	8
	1978	Tb927.8.3960	Tb927.8.3960		hypothetical protein, conserved	45.018	12.5	0	23.086	1	1	0.922663	-0.0349568	0.958005	0.018632		1.7	1	1	0.804959	0.95648	-0.0193241	NaN	1	7.6	3	3	0.82644	0.93368	-0.0298019	7.5207	4	8.3	4	4	0.80371	0.87954	-0.0557444	48.587	5
	267	Tb927.1.4400	Tb927.1.4400		hypothetical protein, conserved	30.868	12.5	0	5.904	1		1.0848	0.0353497				0	0	0	NaN	NaN		NaN	0	0	0	0	NaN	NaN		NaN	0	12.5	2	2	0.99676	1.0848	0.0353497	14.66	2
	545	Tb927.10.4760	Tb927.10.4760		hypothetical protein, conserved	27.159	12.4	0	10.753	1		1.01297	0.00559568	0.415824	0.38109		8.3	2	2	0.807037	0.96432	-0.0157787	6.1294	2	7.4	2	2	0.83646	0.95649	-0.0193196	2.6204	2	8.3	2	2	1.0465	1.1269	0.0518854	16.25	2
	1601	Tb927.6.2090	Tb927.6.2090		hypothetical protein, conserved	78.295	12.4	0	18.979	1		1.04408	0.0187339	0.167515	0.775946		5.5	3	3	0.924044	1.10257	0.042407	21.497	4	9.3	4	4	0.86501	0.98013	-0.00871632	5.686	5	4.6	3	3	0.984	1.0532	0.0225109	1.8185	3
	943	Tb927.11.3270	Tb927.11.3270		squalene monooxygenase, putative	63.81	12.4	0	24.25	1		1.00091	0.000393164	0.485598	0.313723		8.1	4	4	0.828981	0.988338	-0.00509468	22.641	4	7.6	3	3	0.92187	1.0451	0.0191578	1.9326	3	12.4	6	6	0.90058	0.97077	-0.0128837	33.368	6
	1144	Tb927.11.9990	Tb927.11.9990		glycosyl transferase-like protein	34.282	12.4	0	5.5624	1		0.95535	-0.0198373	0.956992	0.0190918		9.1	2	2	0.813207	0.962279	-0.0166991	6.181	2	9.1	2	2	0.86489	0.97506	-0.0109687	23.695	3	6.5	2	2	0.85761	0.9293	-0.0318441	0.57401	2
	1493	Tb927.5.1840	Tb927.5.1840		hypothetical protein, conserved	16.56	12.4	0.0014218	2.5311	1			NaN				12.4	1	1	NaN	NaN		NaN	0	0	0	0	NaN	NaN		NaN	0	0	0	0	NaN	NaN		NaN	0
	1565	Tb927.5.800;Tb927.5.790	Tb927.5.800;Tb927.5.790	CK1.1;CK1.2	casein kinase I, isoform 2 (CK1.2);casein kinase I isoform 1 (CK1.1)	38.374	12.3	0	3.142	2		0.992118	-0.00343665	0.518587	0.285179		12.3	3	3	1.09549	1.2965	0.112771	57.504	3	4.2	1	1	0.87833	0.97763	-0.00982548	NaN	1	12.3	3	3	0.7238	0.77045	-0.113256	37.186	3
	1704	Tb927.6.840	Tb927.6.840		hypothetical protein, conserved	38.157	12.3	0	6.3546	1		0.98089	-0.00837949	0.55586	0.255034		4.6	1	1	0.684838	0.818331	-0.0870712	NaN	1	8.8	2	2	1.1062	1.2351	0.0917021	0.4845	2	8	2	2	0.85937	0.93375	-0.0297694	7.5964	2
	1687	Tb927.6.4960	Tb927.6.4960	zc3h47	zinc finger-domain protein, putative	29.178	12.3	0	13.673	1		0.905078	-0.0433141	0.701445	0.154006		12.3	3	3	0.668986	0.790014	-0.102365	27.352	3	12.3	2	2	0.91781	1.0369	0.0157369	13.505	2	4.2	1	1	NaN	NaN		NaN	0
	1128	Tb927.11.9690	Tb927.11.9690		hypothetical protein, conserved	36.78	12.3	0	14.848	1		0.935533	-0.0289408	0.991911	0.00352731		8.3	2	2	0.786473	0.937119	-0.0282052	10.917	2	0	0	0	NaN	NaN		NaN	0	7.7	2	2	0.86892	0.93395	-0.0296764	0.014495	2
	1665	Tb927.6.4250	Tb927.6.4250		hypothetical protein, conserved	24.919	12.3	0	18.888	1		0.849819	-0.0706736	0.865464	0.0627508		6.8	1	1	0.788208	0.932401	-0.0303973	7.3108	2	12.3	2	2	0.6041	0.68594	-0.163714	55.226	2	6.8	1	1	0.89874	0.9596	-0.0179098	11.097	2
	1830	Tb927.7.5330	Tb927.7.5330		hypothetical protein, conserved	82.999	12.3	0	54.744	1		0.983659	-0.00715522	0.669694	0.174124		12.3	5	5	0.790952	0.922424	-0.0350694	2.0195	6	4.3	1	1	0.90326	1.0213	0.00915333	NaN	1	6.9	3	3	0.93898	1.0103	0.00445035	8.126	4
	1533	Tb927.5.3550	Tb927.5.3550		hypothetical protein, conserved	47.983	12.3	0	10.293	1	1	0.985866	-0.00618192	0.578423	0.237755		5.7	2	2	0.915667	1.07496	0.0313911	3.4479	2	6.8	2	2	0.90385	1.023	0.00987563	30.527	2	7.8	3	3	0.81603	0.87134	-0.0598123	8.6454	3
	136	Tb927.7.5080;Tb11.v5.0188	Tb927.7.5080;Tb11.v5.0188		ATP-NAD kinase-like protein;hypothetical protein, conserved	79.822	12.3	0	21.653	2	1	0.982901	-0.00749017	0.78457	0.105368		2.5	1	1	0.854409	1.00185	0.000804003	NaN	1	7.2	3	3	0.84517	0.94891	-0.022775	37.171	2	10.1	6	6	0.93815	0.99885	-0.000499726	25.721	6
	1870	Tb927.7.6920	Tb927.7.6920		hypothetical protein, conserved	70.056	12.3	0	32.091	1		1.00269	0.00116774	0.452267	0.344606		6.7	2	2	0.841043	0.995124	-0.00212284	20.845	2	9.6	3	3	0.91554	1.041	0.0174507	8.512	2	12.3	5	5	0.89752	0.97314	-0.0118247	14.244	5
	512	Tb927.10.3640	Tb927.10.3640		hypothetical protein, conserved	31.534	12.3	0	9.9149	1		0.992262	-0.00337378	0.591524	0.228028		12.3	3	3	0.881601	1.05221	0.0221028	5.9469	4	9.9	2	2	0.84924	0.9583	-0.0184985	13.033	3	12.3	3	3	0.88375	0.96889	-0.0137255	40.031	4
	1963	Tb927.8.3260	Tb927.8.3260		hypothetical protein, conserved	22.139	12.3	0	12.301	1	1	0.880155	-0.0554409	0.997572	0.00105555		7.2	1	1	0.763767	0.895255	-0.0480532	NaN	1	7.2	1	1	0.77214	0.87681	-0.0570945	NaN	1	12.3	2	2	0.80739	0.86861	-0.0611752	5.8889	2
	329	Tb927.10.11610	Tb927.10.11610		hypothetical protein, conserved	15.824	12.3	0.0049217	1.9367	1		0.89862	-0.0464239				0	0	0	NaN	NaN		NaN	0	0	0	0	NaN	NaN		NaN	0	12.3	1	1	0.83019	0.89862	-0.0464239	NaN	1
	1690	Tb927.9.15190;Tb927.6.5040	Tb927.9.15190;Tb927.6.5040		ribosomal protein L15, putative;ribosomal protein L15, putative	24.401	12.3	0.0040835	2.0808	2		1.0969	0.0401671				12.3	2	2	0.920048	1.0969	0.040167	NaN	1	4.9	1	1	NaN	NaN		NaN	0	0	0	0	NaN	NaN		NaN	0
	2030	Tb927.8.6020	Tb927.8.6020		hypothetical protein, conserved	40.341	12.2	0	7.331	1		1.14808	0.0599733	0.21323	0.671152		2.2	1	1	0.910001	1.08125	0.0339241	NaN	1	12.2	3	3	0.83829	0.93442	-0.0294579	26.441	3	2.2	1	1	1.3756	1.4978	0.175454	NaN	1
	444	Tb927.10.1610	Tb927.10.1610		hypothetical protein, conserved	16.358	12.2	0.0091543	1.7416	1		1.07739	0.0323716	0.39828	0.399812		12.2	1	1	1.13652	1.34958	0.130199	NaN	1	0	0	0	NaN	NaN		NaN	0	12.2	1	1	0.78443	0.86009	-0.0654561	NaN	1
	562	Tb927.10.5450	Tb927.10.5450	nlp	nucleoplasmin-like protein (NLP)	107.29	12.2	0	35.432	1		1.05865	0.024751	0.25481	0.593783		2.2	2	2	0.783515	0.9273	-0.0327799	24.786	2	6.1	4	4	0.95795	1.079	0.0330214	16.304	4	7.6	5	5	1.0997	1.1858	0.0740114	45.031	6
	1804	Tb927.7.4050	Tb927.7.4050		hypothetical protein, conserved	85.652	12.2	0	33.36	1		1.0305	0.0130459	0.389733	0.409233		8.3	4	4	0.760283	0.881601	-0.0547279	42.587	5	9	4	4	1.0857	1.2198	0.0862886	21.873	5	8.9	5	5	0.94802	1.0176	0.0075771	3.0423	6
	1662	Tb927.6.4200	Tb927.6.4200		hypothetical protein, conserved	50.398	12.2	0	65.202	1	1	0.91742	-0.037432	0.888389	0.0513967		7	2	2	0.835003	1.00384	0.00166233	7.2804	3	12.2	4	4	0.79488	0.90857	-0.0416416	18.637	3	7.7	2	2	0.77883	0.84661	-0.0723166	12.081	3
	1643	Tb927.6.3680	Tb927.6.3680		hypothetical protein, conserved	27.875	12.2	0	6.3136	1	1	0.968092	-0.0140835	0.795855	0.0991659		4.9	1	1	0.867905	1.02714	0.0116284	NaN	1	4.9	1	1	0.84989	0.95625	-0.0194286	NaN	1	12.2	3	3	0.85914	0.92374	-0.0344503	10.213	3
	1346	Tb927.3.820	Tb927.3.820		hypothetical protein, conserved	22.174	12.2	0	4.8947	1	1	1.0688	0.0288964				0	0	0	NaN	NaN		NaN	0	6.4	1	1	NaN	NaN		NaN	0	5.9	1	1	0.98613	1.0688	0.0288964	NaN	1
	1012	Tb927.11.5760	Tb927.11.5760		hypothetical protein, conserved	36.516	12.1	0	21.444	1	1	1.1129	0.0464572	0.174392	0.758473		9.7	2	2	1.04094	1.22917	0.0896105	25.948	2	12.1	3	3	1.063	1.2013	0.0796515	66.7	3	4.2	1	1	0.87139	0.93349	-0.0298903	NaN	1
	378	Tb927.10.13510	Tb927.10.13510		zinc metallopeptidase, putative	62.779	12.1	0	44.297	1	1	1.01607	0.00692311	0.42959	0.366946		7.7	3	3	0.859328	1.00495	0.00214618	14.563	4	9.7	4	4	1.0352	1.1716	0.0687794	33.451	5	12.1	5	5	0.82809	0.89093	-0.0501564	38.964	7
	1564	Tb927.5.770	Tb927.5.770		hypothetical protein, conserved	76.378	12.1	0	83.178	1	1	0.925346	-0.033696	0.75442	0.122387		5.5	2	2	0.873134	1.04207	0.0178961	6.1905	2	1.9	1	1	0.68439	0.77065	-0.113143	NaN	1	10.2	4	4	0.90121	0.98664	-0.00584128	17.539	4
	258	Tb927.1.3180	Tb927.1.3180		40S ribosomal protein S11, putative	20.059	12.1	0.0087989	1.8265	1		1.1026	0.042418				5.2	1	0	NaN	NaN		NaN	0	6.9	1	1	0.97355	1.1026	0.042418	NaN	1	5.2	1	0	NaN	NaN		NaN	0
	1551	Tb927.5.4260;Tb927.5.4250;Tb927.5.4240;Tb927.5.4230;Tb927.5.4220;Tb927.5.4210;Tb927.5.4200;Tb927.5.4190;Tb927.5.4180;Tb927.5.4170	Tb927.5.4260;Tb927.5.4250;Tb927.5.4240;Tb927.5.4230;Tb927.5.4220;Tb927.5.4210;Tb927.5.4200;Tb927.5.4190;Tb927.5.4180;Tb927.5.4170		histone H4, putative;histone H4, putative;histone H4, putative;histone H4, putative;histone H4, putative;histone H4, putative;histone H4, putative;histone H4, putative;histone H4, putative;histone H4, putative	11.142	12	0	3.8071	10		1.06578	0.0276681	0.41654	0.380344		12	1	1	1.12703	1.35133	0.130762	NaN	1	0	0	0	NaN	NaN		NaN	0	12	1	1	0.77789	0.84057	-0.0754261	NaN	1
	189	Tb927.11.15470;Tb11.v5.0544	Tb927.11.15470;Tb11.v5.0544		methionyl-tRNA formyltransferase;methionyl-tRNA formyltransferase, putative	71.337	12	0	18.587	2	1	0.94867	-0.022885	0.646374	0.189516		4.8	2	2	0.634558	0.76237	-0.117834	14.299	3	6.5	3	3	1.0319	1.161	0.0648322	15.466	3	8.4	4	4	0.89964	0.9646	-0.0156527	14.045	6
	1187	Tb927.2.4890;Tb927.2.4740	Tb927.2.4890;Tb927.2.4740		ribosomal protein L11, putative;ribosomal protein L11, putative	40.186	12	0	4.2622	2	1	0.942666	-0.0256423	0.70893	0.149397		5.8	2	2	0.666889	0.792079	-0.101231	29.369	2	3.2	1	1	0.86878	0.98341	-0.00726538	NaN	1	12	4	4	0.96819	1.0754	0.03157	33.534	4
	893	Tb927.11.17000;Tb11.v5.0404	Tb927.11.17000;Tb11.v5.0404		leucine-rich repeat protein (LRRP), putative;hypothetical protein, conserved	109.72	12	0	38.604	2		1.01403	0.00605089	0.315564	0.500913		10.5	6	6	0.857927	1.0271	0.0116106	20.327	6	8.2	4	4	0.85073	0.96656	-0.0147712	13.115	4	8.9	5	5	0.96174	1.0503	0.0213134	8.6391	5
	792	Tb927.11.13780	Tb927.11.13780		profilin	16.122	12	0	12.03	1		1.05934	0.0250372				12	1	1	0.895335	1.05934	0.0250374	NaN	1	0	0	0	NaN	NaN		NaN	0	0	0	0	NaN	NaN		NaN	0
	1298	Tb927.3.4380	Tb927.3.4380	SAM50	Tob55, putative	53.558	11.9	0	12.949	1	1	1.17586	0.0703557	0.148977	0.826881		8.6	4	4	0.840477	1.00759	0.00328256	7.1964	3	4.2	2	2	1.3228	1.4764	0.169204	NaN	1	10	4	4	1.011	1.0929	0.0385804	9.009	4
	1380	Tb927.4.2220	Tb927.4.2220		TPR-repeat-containing chaperone protein DNAJ, putative	80.445	11.9	0	15.903	1		1.07225	0.0302979	0.314167	0.50284		7.8	4	4	0.892698	1.06743	0.0283394	32.703	4	3.7	2	2	1.1759	1.3303	0.12395	13.326	2	9.9	6	6	0.8063	0.86817	-0.0613952	30.735	6
	409	Tb927.10.14590	Tb927.10.14590		hypothetical protein, conserved	33.674	11.9	0	6.0433	1	1	0.920342	-0.0360508	0.679637	0.167723		2.6	1	1	0.677599	0.807233	-0.0930012	NaN	1	0	0	0	NaN	NaN		NaN	0	9.3	2	2	0.98122	1.0493	0.0208997	6.3959	2
	516	Tb927.10.3740	Tb927.10.3740		hypothetical protein, conserved	54.375	11.9	0	20.999	1		1.01007	0.00435209	0.443479	0.353127		9	3	3	0.753864	0.892857	-0.049218	184.11	3	4	1	1	0.97538	1.0906	0.0376655	NaN	1	9.4	3	3	0.99262	1.0583	0.0246088	22.158	3
	907	Tb927.11.2220	Tb927.11.2220		hypothetical protein, conserved	50.086	11.9	0	17.786	1	1	0.979152	-0.00914966	0.5577	0.2536		1.8	1	1	1.06485	1.26526	0.10218	NaN	1	1.8	1	1	0.77465	0.86709	-0.0619358	NaN	1	11.9	4	4	0.79154	0.85567	-0.0676937	24.505	4
	2275	Tb927.9.6510	Tb927.9.6510		hypothetical protein, conserved	75.135	11.9	0	34.488	1	1	0.986429	-0.00593402	0.584455	0.233249		5	3	3	0.754319	0.896298	-0.0475474	14.261	3	6.2	4	4	0.86919	0.98292	-0.00748183	19.274	5	9	5	5	1.0182	1.0895	0.0372272	9.7359	6
	1623	Tb927.6.2690	Tb927.6.2690		ubiquitin carboxyl-terminal hydrolase, putative,cysteine peptidase, Clan CA, family C19, putative	70.409	11.9	0	20.609	1		1.03383	0.0144484	0.0541644	1.26629		6.6	3	3	0.85266	1.01263	0.0054495	12.512	4	6.6	3	3	0.94745	1.0554	0.0234171	20.84	3	4.9	2	2	0.95631	1.0339	0.0144785	3.2813	2
	1470	Tb927.5.1130	Tb927.5.1130		hypothetical protein, conserved	34.299	11.9	0	6.9393	1	1	0.919185	-0.0365972	0.889972	0.0506236		4.2	1	1	0.707915	0.855066	-0.0680002	NaN	1	7.4	2	2	0.79806	0.90275	-0.0444325	10.983	2	11.9	3	3	0.93724	1.0061	0.00264115	41.808	3
	756	Tb927.11.12540	Tb927.11.12540		leucine-rich repeat protein (LRRP), putative	115.21	11.9	0	30.781	1		0.924142	-0.0342611	0.884007	0.0535441		5.3	4	4	0.779241	0.905387	-0.0431657	8.5417	3	2.5	2	2	0.76977	0.8631	-0.0639389	6.2424	2	10.6	9	9	0.94147	1.01	0.00432137	3.2558	9
	2156	Tb927.9.12850	Tb927.9.12850		hypothetical protein, conserved	66.991	11.8	0	16.23	1	1	1.12165	0.049857	0.214868	0.667829		4.4	2	2	1.12628	1.32363	0.121766	43.354	2	3.1	1	1	1.0606	1.1913	0.0760211	NaN	1	4.3	2	2	0.82932	0.89492	-0.0482158	3.0565	2
	1155	Tb927.2.2470	Tb927.2.2470	KREPA1	RNA-editing complex protein,KREPA1 (KREPA1)	81.293	11.8	0	19.912	1	1	1.13331	0.0543471	0.191245	0.718409		4.7	2	2	1.17676	1.4102	0.14928	40.381	2	7	3	3	0.92774	1.0656	0.0275942	8.7701	4	9.6	4	4	0.90618	0.96865	-0.0138331	8.4745	5
	1145	Tb927.2.1330	Tb927.2.1330		retrotransposon hot spot protein (RHS, pseudogene), putative,retrotransposon hot spot protein 6 (RHS6), degenerate	65.638	11.8	0	3.6209	1		1.10672	0.0440371	0.312835	0.504685		9.5	5	1	0.887548	1.04432	0.018834	NaN	1	10.5	4	1	0.74537	0.84106	-0.075173	NaN	1	9.5	4	1	1.4438	1.5433	0.18845	NaN	1
	154	Tb927.7.4570;Tb11.v5.0270	Tb927.7.4570;Tb11.v5.0270	IG-NH	inosine-guanine nucleoside hydrolase (IG-NH);nucleoside hydrolase, putative	39.39	11.8	0	18.816	2		1.04865	0.0206296	0.229294	0.639608		3.6	1	1	0.976276	1.16007	0.0644827	NaN	1	11.8	2	2	0.86526	0.97465	-0.0111513	0.40342	2	11.8	2	2	0.93904	1.0199	0.00855759	4.9441	2
	337	Tb927.10.12190	Tb927.10.12190		RAB-interacting protein, putative	23.819	11.8	0	5.5936	1		0.927577	-0.03265	0.769878	0.113578		7.1	1	1	0.870322	1.03682	0.0157021	NaN	1	11.8	2	2	0.70359	0.78878	-0.103044	46.845	2	7.1	1	1	0.89506	0.97587	-0.010608	NaN	1
	2117	Tb927.9.10710	Tb927.9.10710		elongation factor 1-alpha, putative,hsp70 subfamily B suppressor 1	70.209	11.8	0	32.13	1		1.01059	0.00457647	0.371976	0.429485		7.2	4	4	0.83696	1.00419	0.00181459	4.8759	4	3.3	2	2	0.94894	1.0641	0.0269824	0.27165	2	8.5	5	5	0.89853	0.9659	-0.0150678	15.925	5
	844	Tb927.11.15450	Tb927.11.15450		hypothetical protein	269.62	11.8	0.0014198	2.5172	1		0.77837	-0.108814				0	0	0	NaN	NaN		NaN	0	0	0	0	NaN	NaN		NaN	0	11.8	2	2	0.71923	0.77837	-0.108814	7.1413	2
	1555	Tb927.5.510	Tb927.5.510		hypothetical protein, conserved	14.154	11.8	0	3.6007	1	1	1.0901	0.0374664				0	0	0	NaN	NaN		NaN	0	11.8	1	1	0.95473	1.0901	0.0374663	13.927	2	0	0	0	NaN	NaN		NaN	0
	922	Tb927.11.2610	Tb927.11.2610		hypothetical protein, conserved	50.887	11.7	0	25.759	1		1.09196	0.038208	0.333955	0.476313		3.7	1	1	0.7373	0.874279	-0.0583501	NaN	1	3.7	1	1	1.3837	1.5481	0.189799	NaN	1	11.7	3	3	0.88397	0.962	-0.0168249	14.245	3
	1568	Tb927.5.900;Tb11.v5.0559	Tb927.5.900;Tb11.v5.0559		oligosaccharyl transferase subunit, putative;oligosaccharyl transferase subunit, putative	92.232	11.7	0	51.128	2		1.10503	0.0433731	0.0921394	1.03555		9.4	6	1	0.842744	1.0026	0.0011264	NaN	1	8	5	1	1.0081	1.1364	0.0555312	NaN	1	11.6	7	1	1.0966	1.1843	0.0734617	NaN	1
	1670	Tb927.6.4330	Tb927.6.4330		hypothetical protein, conserved	23.949	11.7	0.001845	2.2245	1		0.979726	-0.00889551	0.537561	0.269572		0	0	0	NaN	NaN		NaN	0	7	1	1	1.0404	1.1645	0.0661395	NaN	1	11.7	2	2	0.7594	0.82427	-0.0839305	15.86	2
	1537	Tb927.5.3700	Tb927.5.3700		hypothetical protein, conserved	32.239	11.6	0	17.655	1	1	1.14824	0.0600315	0.0820662	1.08584		11.6	2	2	1.10714	1.29912	0.11365	21.43	2	11.6	2	2	0.93803	1.0471	0.0199882	27.724	2	11.6	2	2	1.0433	1.1129	0.0464561	6.5789	2
	567	Tb927.8.1110;Tb927.10.5610	Tb927.8.1110;Tb927.10.5610		40S ribosomal protein S9, putative;40S ribosomal protein S9, putative	22.051	11.6	0	3.7873	2		0.975751	-0.010661	0.560662	0.251299		5.8	1	1	0.61512	0.734592	-0.133954	NaN	1	11.6	2	2	1.0056	1.1332	0.0543066	4.1742	2	11.6	2	2	1.0395	1.116	0.0476642	4.0229	2
	2298	Tb927.9.7830	Tb927.9.7830		hypothetical protein, conserved	22.986	11.6	0	19.809	1	1	1.06071	0.0255969	0.120188	0.920137		11.6	1	1	0.825832	0.98824	-0.00513757	NaN	1	11.6	1	1	0.98265	1.1077	0.0444222	NaN	1	11.6	1	1	1.0053	1.0902	0.0375062	NaN	1
	1559	Tb927.5.560	Tb927.5.560		hypothetical protein, conserved	57.756	11.6	0	9.7026	1	1	1.02215	0.00951401	0.334102	0.476121		6.1	2	2	0.823181	0.98561	-0.00629485	1.6937	2	3.9	1	1	0.99877	1.1158	0.0475864	NaN	1	9.3	3	3	0.88596	0.97107	-0.0127495	5.1376	3
	1973	Tb927.8.3650	Tb927.8.3650		folate transporter, putative,expression site-associated gene 10 (ESAG10) protein, putative	69.928	11.6	0	55.156	1		0.893388	-0.0489599	0.976152	0.0104827		4.1	1	0	NaN	NaN		NaN	0	11.6	4	1	0.80034	0.90098	-0.0452848	9.3895	2	8.9	3	1	0.83746	0.88586	-0.0526349	NaN	1
	1653	Tb927.6.4040	Tb927.6.4040		hypothetical protein, conserved	28.009	11.6	0	6.1588	1	1	0.93637	-0.0285525				0	0	0	NaN	NaN		NaN	0	7.5	1	1	NaN	NaN		NaN	0	11.6	2	2	0.85502	0.93637	-0.0285525	NaN	1
	1970	Tb927.8.3490	Tb927.8.3490		hypothetical protein, conserved	120.39	11.5	0	25.455	1		1.24917	0.096623	0.14134	0.849736		8.7	7	2	0.776699	0.920725	-0.0358698	11.226	2	1.2	1	1	1.3071	1.478	0.169674	NaN	1	8	6	4	1.3379	1.4324	0.156064	45.796	4
	1334	Tb927.3.5550	Tb927.3.5550	TbRX1	small GTP-binding protein, putative (TbRX1)	20.638	11.5	0.0045167	2.0161	1		1.03674	0.0156698	0.395775	0.402552		7.1	1	1	0.738607	0.867002	-0.0619799	NaN	1	4.4	1	1	0.87751	0.98767	-0.00538814	NaN	1	7.1	1	1	1.2174	1.3013	0.114377	NaN	1
	851	Tb927.11.15800	Tb927.11.15800		hypothetical protein, conserved	89.585	11.5	0	24.669	1		1.00603	0.00261201	0.442157	0.354424		3.9	2	2	0.798212	0.935979	-0.0287339	33.995	2	8.4	4	4	0.92719	1.033	0.0141003	6.4692	4	5.9	4	4	0.90669	1.0531	0.0224696	13.377	5
	998	Tb927.11.530	Tb927.11.530	RBP3	RNA-binding protein, putative (RBP3)	22.331	11.5	0	3.7557	1		2.74273	0.438183				7.5	1	1	2.33106	2.74273	0.438183	NaN	1	0	0	0	NaN	NaN		NaN	0	4	1	1	NaN	NaN		NaN	0
	767	Tb927.11.1310	Tb927.11.1310	B5R	NADH-cytochrome b5 reductase, putative (B5R)	37.14	11.4	0	3.1229	1	1	1.0231	0.00991637	0.428971	0.367572		5.2	2	2	0.77232	0.908513	-0.0416689	19.103	2	6.2	1	1	0.81387	0.9201	-0.036165	NaN	1	2.8	1	1	1.1974	1.2811	0.107583	NaN	1
	450	Tb927.10.1860	Tb927.10.1860		hypothetical protein, conserved	39.134	11.4	0	23.52	1		1.05582	0.0235884	0.205916	0.686309		3.6	1	1	0.801154	0.951656	-0.0215201	NaN	1	8.1	2	2	0.97144	1.0938	0.0389379	47.358	2	11.4	3	3	1.0519	1.1307	0.0533474	30.652	4
	1458	Tb927.4.730	Tb927.4.730		hypothetical protein, conserved	55.016	11.4	0	28.679	1		0.969907	-0.0132699	0.655061	0.183719		8.1	3	3	0.904895	1.06626	0.0278619	11.26	4	7.5	2	2	0.89788	1.0023	0.00099773	18.829	3	8.1	3	3	0.78576	0.85375	-0.0686693	16.46	4
	1477	Tb927.5.1370	Tb927.5.1370	PPIase	cyclophilin-type peptidyl-prolyl cis-trans isomerase, putative,PPIase, putative,rotamase, putative,cyclosporin A-binding protein, putative,peptidyl-prolyl cis-trans isomerase, putative (PPIase)	25.562	11.4	0	3.6468	1	1	1.01499	0.00645998	0.364531	0.438266		11.4	2	2	0.888178	1.04885	0.0207113	8.1165	2	0	0	0	NaN	NaN		NaN	0	11.4	2	2	0.90983	0.98222	-0.00779123	10.481	2
	220	Tb927.3.2340;Tb11.v5.0818	Tb927.3.2340;Tb11.v5.0818	PEX2	peroxin-2,glycosome import protein (gim1) (PEX2);peroxin-2, putative	37.747	11.4	0	10.593	2		0.910399	-0.040768	0.840565	0.0754289		5.4	1	1	0.861178	1.0222	0.00953673	NaN	1	5.4	1	1	0.81721	0.92348	-0.0345725	1.3296	2	11.4	2	2	0.73389	0.79934	-0.0972685	27.096	2
	552	Tb927.10.5020	Tb927.10.5020	eif4e5	hypothetical protein, conserved	21.98	11.3	0	12.051	1		1.04142	0.0176239	0.426593	0.369986		7.7	1	1	0.731475	0.876117	-0.0574378	NaN	1	0	0	0	NaN	NaN		NaN	0	11.3	2	2	1.1451	1.2379	0.0926856	3.5577	2
	2224	Tb927.9.3120	Tb927.9.3120		protein kinase, putative	113.39	11.3	0	19.463	1		1.06442	0.0271144	0.316274	0.499937		6.2	4	4	0.839278	0.985125	-0.00650884	8.6517	4	5.2	3	3	0.82094	0.92274	-0.0349207	29.303	2	5.3	3	3	1.2115	1.3267	0.122773	20.969	3
	1185	Tb927.2.470;Tb11.v5.0800;Tb927.2.1100	Tb927.2.470		retrotransposon hot spot protein 4 (RHS4), putative	98.316	11.3	0	14.863	3		1.05774	0.0243795	0.362969	0.44013		4.7	4	1	0.908678	1.08807	0.036656	NaN	1	4.7	4	1	1.1763	1.3258	0.122478	NaN	1	11.3	10	1	0.7551	0.82036	-0.0859955	NaN	1
	703	Tb927.11.1070	Tb927.11.1070	gat3	glycosomal transporter (GAT3), putative (gat3)	75.51	11.3	0	18.22	1		1.02955	0.0126462	0.343392	0.46421		4.8	3	3	0.79384	0.93985	-0.0269416	4.5874	3	8.3	4	4	1.0325	1.1602	0.0645329	20.673	3	4.8	3	3	0.92962	1.0008	0.000347297	2.5333	2
	883	Tb927.11.16740	Tb927.11.16740		chaperone protein DNAj, putative	42.846	11.2	0	9.0723	1		1.08141	0.0339924	0.223645	0.650441		4.7	1	1	1.01857	1.22369	0.0876718	NaN	1	3.4	1	1	0.99793	1.1203	0.0493343	NaN	1	11.2	3	3	0.8654	0.92251	-0.0350289	13.449	3
	1649	Tb927.6.3870	Tb927.6.3870	SGN1	RNA-binding protein, putative (SGN1)	22.904	11.2	0	16.865	1		1.216	0.0849336				0	0	0	NaN	NaN		NaN	0	0	0	0	NaN	NaN		NaN	0	11.2	3	3	1.1107	1.216	0.0849336	0.95883	2
	2096	Tb927.8.8310	Tb927.8.8310		chaperone protein DNAj, putative	51.72	11.2	0	10.747	1		1.1339	0.0545748				0	0	0	NaN	NaN		NaN	0	0	0	0	NaN	NaN		NaN	0	11.2	2	2	1.039	1.1339	0.0545748	9.9571	2
	969	Tb927.11.4330	Tb927.11.4330		hypothetical protein, conserved	21.02	11.1	0	3.6398	1	1	1.14022	0.0569902	0.0744836	1.12794		11.1	1	1	1.03628	1.23012	0.0899468	NaN	1	11.1	1	1	1.057	1.1824	0.0727644	NaN	1	11.1	1	1	0.95733	1.0192	0.00825941	NaN	1
	622	Tb927.10.7910	Tb927.10.7910		hypothetical protein, conserved	21.451	11.1	0	6.3962	1	1	1.08318	0.0347014	0.324934	0.488204		6.3	1	1	1.20872	1.4619	0.164919	NaN	1	11.1	2	2	0.79747	0.90175	-0.0449138	2.5866	2	6.3	1	1	0.88991	0.96405	-0.0159004	NaN	1
	1294	Tb927.3.4120	Tb927.3.4120		hypothetical protein, conserved	73.301	11.1	0	25.173	1		0.829877	-0.0809861	0.81086	0.0910541		5.2	2	2	0.613836	0.731636	-0.135705	37.134	2	0	0	0	NaN	NaN		NaN	0	11.1	4	4	0.86239	0.94131	-0.0262673	15.797	4
	1998	Tb927.8.4890	Tb927.8.4890		endoplasmic reticulum oxidoreductin, putative,pol-associated gene 1	49.202	11.1	0	18.44	1		1.00834	0.00360842	0.397107	0.401092		8.4	3	3	0.847889	1.01779	0.00765861	5.3348	3	7.9	3	3	0.84968	0.95689	-0.019138	19.041	3	8.4	3	3	0.97951	1.0527	0.0223046	5.6937	3
	1892	Tb927.7.850	Tb927.7.850		hypothetical protein, conserved	36.845	11.1	0	36.083	1		0.98417	-0.00692985	0.566412	0.246868		7.8	2	2	0.973047	1.16217	0.0652693	25.8	2	7.8	2	2	0.82401	0.92693	-0.0329531	2.9701	2	11.1	3	3	0.81835	0.8849	-0.0531058	10.164	2
	1976	Tb927.8.3930	Tb927.8.3930		hypothetical protein, conserved	72.162	11.1	0.0018639	2.3403	1		1.00602	0.00260455	0.430692	0.365833		11.1	6	1	0.830703	0.98668	-0.00582372	NaN	1	2.2	1	1	0.95725	1.0676	0.0284086	NaN	1	5.1	3	1	0.89761	0.96656	-0.0147712	NaN	1
	1385	Tb927.4.2320	Tb927.4.2320		hypothetical protein, conserved	15.722	11.1	0	7.5146	1		1.0499	0.021148				0	0	0	NaN	NaN		NaN	0	0	0	0	NaN	NaN		NaN	0	11.1	1	1	0.96652	1.0499	0.0211479	1.4246	2
	1107	Tb927.11.9230	Tb927.11.9230		hypothetical protein, conserved	37.815	11	0	9.3658	1		1.67016	0.222758	0.256203	0.591416		2.8	1	1	0.829256	0.979816	-0.00885556	NaN	1	6.5	2	2	2.5238	2.8469	0.454372	108.04	2	4.5	1	1	NaN	NaN		NaN	0
	230	Tb927.11.3600;Tb927.11.3590;Tb11.v5.1059	Tb927.11.3600;Tb927.11.3590;Tb11.v5.1059		40S ribosomal protein S4, putative;40S ribosomal protein S4, putative;40S ribosomal protein S4, putative	30.644	11	0	4.9381	3		0.992646	-0.00320565	0.638006	0.195175		3.3	1	1	0.809389	0.976944	-0.0101303	NaN	1	0	0	0	NaN	NaN		NaN	0	7.7	2	2	0.93175	1.0086	0.00371896	7.6574	2
	963	Tb927.11.4020	Tb927.11.4020		hypothetical protein, conserved	19.159	11	0	7.1927	1	1	1.0769	0.032176	0.0604284	1.21876		11	2	2	0.965904	1.13672	0.0556554	9.6571	2	11	2	2	0.93872	1.0641	0.0269824	2.8702	2	11	2	2	0.95506	1.0325	0.0138901	5.0134	3
	2241	Tb927.9.4360	Tb927.9.4360	KREL1	KREL1 (KREL1)	52.226	10.9	0	13.079	1	1	1.14661	0.0594146	0.0925535	1.03361		10.9	6	6	0.91878	1.10152	0.0419908	8.8739	6	7.5	3	3	1.15	1.3111	0.117636	20.721	3	10.9	5	5	0.96213	1.0438	0.0186173	12.237	6
	1480	Tb927.5.1510	Tb927.5.1510		hypothetical protein, conserved	35.464	10.9	0	16.6	1	1	1.13314	0.0542833	0.154005	0.812465		10.9	2	2	1.1392	1.35575	0.132179	13.883	2	10.9	2	2	0.8938	0.99821	-0.000778084	14.861	2	10.9	2	2	0.99856	1.0751	0.0314489	3.5201	2
	1490	Tb927.5.1790	Tb927.5.1790		hypothetical protein, conserved	71.956	10.9	0	12.586	1	1	1.07916	0.0330876	0.29921	0.524023		4	2	2	1.10486	1.30463	0.115488	NaN	1	4	2	2	0.75243	0.85736	-0.0668368	2.4937	2	9.4	4	4	1.0208	1.1236	0.0506117	23.118	4
	812	Tb927.11.14360	Tb927.11.14360	MCP2	mitochondrial carrier protein (MCP2)	38.053	10.9	0	3.873	1	1	1.04918	0.0208504	0.0858594	1.06621		4.1	1	1	0.889521	1.03535	0.0150859	NaN	1	0	0	0	NaN	NaN		NaN	0	10.9	2	2	1.0024	1.0632	0.026615	21.379	2
	695	Tb927.11.10340	Tb927.11.10340	pgam5	phosphoglycerate mutase family member 5, putative	33.783	10.9	0	9.1398	1	1	0.986314	-0.00598478	0.543224	0.265021		3.6	1	1	0.771248	0.921659	-0.0354298	NaN	1	3.6	1	1	1.09	1.2282	0.0892691	NaN	1	10.9	3	3	0.78321	0.84763	-0.0717937	65.524	2
	1068	Tb927.11.7530	Tb927.11.7530		long-chain-fatty-acid-CoA ligase, putative	80.712	10.9	0	16.596	1	1	1.05607	0.0236921	0.143268	0.84385		3.2	2	2	0.954198	1.13881	0.0564509	0.62178	2	9.8	5	5	0.9041	1.0233	0.010003	20.035	6	2.3	2	2	0.94123	1.0107	0.00462227	12.213	2
	511	Tb927.10.3590	Tb927.10.3590		hypothetical protein, conserved	62.825	10.9	0	13.653	1	1	0.884383	-0.0533594	0.908227	0.0418058		4.7	2	2	0.801411	0.95048	-0.022057	24.716	2	6.8	3	3	0.82248	0.92987	-0.0315778	12.06	5	8.9	3	3	0.72205	0.78263	-0.106444	33.357	4
	716	Tb927.11.11080	Tb927.11.11080	TbNup149	Nucleoporin (TbNup149)	149.23	10.8	0	11.304	1		1.1768	0.0707012	0.181975	0.739988		1.3	1	1	0.806972	0.949668	-0.0224284	NaN	1	3.8	1	1	0.98991	1.1219	0.0499541	7.017	2	9.5	3	3	1.4333	1.5296	0.184578	6.2506	3
	1339	Tb927.3.5650	Tb927.3.5650		protein kinase, putative,serine/threonine protein kinase, putative	103.57	10.8	0	42.149	1		1.11611	0.0477061	0.175101	0.756712		6.7	6	6	0.783454	0.937471	-0.0280423	22.793	6	3.3	2	2	1.0386	1.1652	0.0664005	14.087	3	7.5	6	6	1.178	1.2728	0.10476	10.238	6
	687	Tb927.11.10170	Tb927.11.10170		hypothetical protein, conserved	24.353	10.8	0	13.654	1	1	1.10168	0.042056	0.265388	0.576119		6.6	1	1	1.18256	1.41898	0.151977	NaN	1	10.8	2	2	0.82649	0.93067	-0.0312043	15.236	2	10.8	2	2	0.93407	1.0125	0.00539503	12.663	2
	2153	Tb927.9.12750	Tb927.9.12750		hypothetical protein, conserved	38.624	10.8	0	3.8862	1	1	1.07423	0.0310991	0.0989983	1.00437		10.8	3	3	0.9739	1.12802	0.0523164	0.42231	2	2.9	1	1	0.87099	0.99742	-0.00112193	NaN	1	2.9	1	1	1.0308	1.1018	0.0421028	NaN	1
	101	Tb927.10.4430;Tb10.v4.0033;Tb11.v5.0767	Tb927.10.4430;Tb10.v4.0033;Tb11.v5.0767	PUF1;PUF1	pumillo RNA binding protein PUF1 (PUF1);pumillo RNA binding protein PUF1,chrX additional, unordered contigs (PUF1);pumillo RNA binding protein PUF1, putative	63.851	10.8	0	13.905	3		1.05353	0.0226467	0.215085	0.66739		0	0	0	NaN	NaN		NaN	0	6.5	2	2	0.96692	1.0985	0.0408001	26.643	2	10.8	4	4	0.94976	1.0104	0.00449334	21.89	5
	349	Tb927.10.12520	Tb927.10.12520		hypothetical protein, conserved	94.523	10.8	0	22.968	1	1	0.987061	-0.00565591	0.596275	0.224554		6.8	3	3	0.804182	0.953562	-0.0206512	37.131	4	3.2	2	2	0.96311	1.0831	0.0346686	11.57	3	5.5	3	3	0.8615	0.93114	-0.030985	15.29	4
	952	Tb927.11.3570	Tb927.11.3570		aminopeptidase, putative,metallo-peptidase, Clan MA(E) Family M1	98.098	10.8	0	18.688	1		1.00615	0.00266108	0.335339	0.474516		3.6	2	2	0.859623	1.00388	0.00167964	10.696	3	7.8	5	5	0.87462	0.98593	-0.00615392	11.446	5	6.5	4	4	0.95953	1.0291	0.0124576	30.245	4
	505	Tb927.10.3480	Tb927.10.3480		hypothetical protein, conserved	76.27	10.8	0	16.536	1		0.983014	-0.00744024	0.615457	0.210802		5.8	2	2	0.92285	1.0818	0.034145	2.7545	2	3.3	1	1	0.85274	0.96623	-0.0149195	NaN	1	7.4	3	3	0.84054	0.90877	-0.041546	24.882	3
	1041	Tb927.11.6420	Tb927.11.6420		hypothetical protein, conserved	144.87	10.7	0	17.211	1		0.990379	-0.00419865	0.539877	0.267705		3.4	3	3	0.776217	0.923446	-0.0345884	9.2518	2	6.3	5	5	0.80434	0.89611	-0.0476387	9.6312	3	6.9	6	6	1.0965	1.1739	0.0696311	18.702	6
	1043	Tb927.11.6490	Tb927.11.6490		hypothetical protein, conserved	28.411	10.7	0	12.733	1		0.748418	-0.125856	0.777717	0.109178		4.1	1	1	0.942507	1.12704	0.0519393	NaN	1	4.1	1	1	0.8088	0.90602	-0.0428622	NaN	1	6.6	1	1	0.37856	0.41054	-0.386645	NaN	1
	843	Tb927.11.15440	Tb927.11.15440		hypothetical protein, conserved	23.683	10.7	0	3.1103	1	1	0.964871	-0.0155309	0.938648	0.0274973		5.8	1	1	0.805412	0.971629	-0.0124998	NaN	1	0	0	0	NaN	NaN		NaN	0	10.7	2	2	0.89055	0.95816	-0.018562	33.111	2
	1723	Tb927.7.1500	Tb927.7.1500	NBP 2	nucleotide binding protein, putative (NBP 2)	30.73	10.7	0	21.381	1		0.943407	-0.0253009	0.728468	0.13759		10.7	2	2	0.808538	0.953653	-0.0206098	18.483	3	10.7	2	2	0.7218	0.8169	-0.0878311	23.712	3	10.7	2	2	0.98274	1.0778	0.0325382	12.167	3
	397	Tb927.10.1410	Tb927.10.1410		hypothetical protein, conserved	28.148	10.7	0.0040946	2.108	1	1	1.8672	0.271191				0	0	0	NaN	NaN		NaN	0	0	0	0	NaN	NaN		NaN	0	10.7	2	2	1.7013	1.8672	0.271191	104.74	2
	933	Tb927.11.2930	Tb927.11.2930		hypothetical protein, conserved	13.477	10.7	0	5.2833	1	1	1.1785	0.0713296				0	0	0	NaN	NaN		NaN	0	0	0	0	NaN	NaN		NaN	0	10.7	1	1	1.1011	1.1785	0.0713296	NaN	1
	1979	Tb927.8.3970	Tb927.8.3970		oxidoreductase, putative	45.637	10.6	0.0004914	2.9764	1		1.15278	0.0617458	0.357228	0.447055		4.8	1	1	1.29831	1.54899	0.19005	NaN	1	0	0	0	NaN	NaN		NaN	0	5.8	1	1	0.80805	0.85791	-0.0665583	NaN	1
	1854	Tb927.7.620	Tb927.7.620		hypothetical protein, conserved	43.012	10.6	0	11.82	1	1	1.08639	0.0359876	0.161902	0.790748		2.8	1	1	0.881057	1.04805	0.0203832	NaN	1	10.6	3	3	0.88906	0.99474	-0.00229042	82.444	3	5.8	2	2	1.1305	1.2299	0.0898698	37.575	2
	1307	Tb927.3.4680	Tb927.3.4680		RAB GDP dissociation inhibitor alpha, putative	49.396	10.6	0	5.7803	1		0.870299	-0.0603316	0.880112	0.0554621		2.5	1	1	0.784068	0.919456	-0.0364692	NaN	1	10.6	3	3	0.71994	0.82377	-0.084194	1.349	2	0	0	0	NaN	NaN		NaN	0
	956	Tb927.11.3790	Tb927.11.3790		hypothetical protein, conserved	32.372	10.6	0	5.4966	1		1.01101	0.00475355	0.24376	0.613038		10.6	3	3	0.825968	0.985125	-0.00650884	14.905	3	3.4	1	1	0.89753	1.0238	0.0102151	NaN	1	3.4	1	1	0.91794	1.0246	0.0105544	NaN	1
	1335	Tb927.3.5590	Tb927.3.5590		hypothetical protein, conserved	77.227	10.6	0	23.03	1	1	1.00724	0.00313247	0.440239	0.356312		2.6	2	2	0.932053	1.09416	0.0390824	23.678	2	3.9	3	3	0.8491	0.95138	-0.021646	1.5946	2	8.2	4	4	0.9019	0.98166	-0.0080389	12.284	4
	629	Tb927.10.8110	Tb927.10.8110		hypothetical protein, conserved	30.41	10.6	0	7.6689	1	1	0.895277	-0.0480426	0.937547	0.0280071		10.6	3	3	0.795039	0.947418	-0.0234582	31.453	4	4	1	1	0.82576	0.92103	-0.0357262	NaN	1	2.9	1	1	0.75873	0.82235	-0.0849433	NaN	1
	1916	Tb927.8.1680	Tb927.8.1680	kkt12	hypothetical protein, conserved	23.036	10.5	0	5.6186	1		1.27036	0.103927	0.0876058	1.05747		6	1	1	0.848608	1.01049	0.00453159	NaN	1	6	1	1	1.2898	1.4721	0.167937	NaN	1	10.5	2	2	1.2579	1.3782	0.139312	32.154	2
	966	Tb927.11.4200	Tb927.11.4200		lectin, putative,mannose-specific lectin, putative	62.272	10.5	0	12.706	1		1.13091	0.0534276	0.0648832	1.18787		8.1	2	2	0.917936	1.07949	0.0332202	12.395	3	4.2	1	1	0.93386	1.0737	0.030883	NaN	1	2.4	1	1	1.1473	1.2479	0.0961798	NaN	1
	784	Tb927.11.13590	Tb927.11.13590		hypothetical protein, conserved	15.576	10.5	0	5.1788	1	1	1.09201	0.0382277	0.325245	0.487789		10.5	1	1	0.7249	0.861326	-0.0648322	NaN	1	10.5	1	1	0.88807	1.0035	0.00151738	NaN	1	10.5	1	1	1.3728	1.5066	0.177998	NaN	1
	1666	Tb927.6.4260	Tb927.6.4260		hypothetical protein, conserved	34.251	10.5	0	14.816	1		1.0825	0.0344294	0.197455	0.704532		5.6	1	1	0.974184	1.14558	0.0590254	NaN	1	0	0	0	NaN	NaN		NaN	0	5	1	1	0.9401	1.0229	0.00983318	NaN	1
	1946	Tb927.8.2730	Tb927.8.2730		hypothetical protein, conserved	42.775	10.5	0	8.2607	1		0.908281	-0.0417799	0.899596	0.0459524		8.6	3	3	0.748503	0.889759	-0.0507277	17.268	3	6.8	2	2	0.88429	1.0009	0.000390689	15.584	2	7.9	3	3	0.75786	0.84139	-0.0750027	7.5701	3
	746	Tb927.11.12160	Tb927.11.12160		hypothetical protein, conserved	23.492	10.5	0	9.1848	1	1	0.97055	-0.0129821	0.79791	0.0980459		9	1	1	0.880049	1.02584	0.0110801	8.1934	2	10.5	3	3	0.85085	0.95498	-0.0200057	1.517	3	9	1	1	0.86991	0.93321	-0.0300206	15.119	2
	620	Tb927.10.770	Tb927.10.770		hypothetical protein, conserved	69.121	10.4	0	36.169	1	1	1.11637	0.0478099	0.151905	0.818427		4	2	2	1.1181	1.30907	0.116964	0.53097	2	2.7	1	1	0.89567	1.0129	0.00556657	NaN	1	10.4	6	6	0.97329	1.0493	0.0208997	19.593	7
	495	Tb927.10.3080	Tb927.10.3080		methionine biosynthetic protein, putative	44.444	10.4	0	8.1549	1		0.9826	-0.00762318	0.545429	0.263261		10.4	4	4	0.853752	1.01966	0.00845496	13.753	4	5.3	2	2	1.0783	1.2182	0.0857186	35.076	2	7.1	3	3	0.70167	0.76376	-0.117043	8.2056	3
	950	Tb927.11.3520	Tb927.11.3520		hypothetical protein, conserved	27.352	10.4	0	8.6557	1		1.01942	0.0083539	0.279336	0.553874		0	0	0	NaN	NaN		NaN	0	2.9	1	1	0.87883	0.99609	-0.00170142	NaN	1	7.5	1	1	0.9701	1.0433	0.0184092	NaN	1
	2319	Tb927.9.9150	Tb927.9.9150		GTP-binding protein, putative	50.353	10.4	0	9.3484	1	1	0.849994	-0.0705842	0.732511	0.135186		4.9	2	2	0.862738	1.0191	0.00821595	9.4764	2	0	0	0	NaN	NaN		NaN	0	10.4	4	4	0.65861	0.70895	-0.149384	21.141	4
	176	Tb927.10.15650;Tb11.v5.0465	Tb927.10.15650;Tb11.v5.0465		tRNA pseudouridine synthase A-like protein;tRNA pseudouridine synthase A-like protein, putative	64.812	10.4	0	8.9829	2	1	0.9688	-0.0137658	0.614107	0.211756		7.6	3	3	0.808342	0.965717	-0.0151501	31.813	4	8.1	3	3	1.0176	1.1451	0.0588434	10.479	3	8.1	3	3	0.76107	0.82226	-0.0849908	14.09	3
	1972	Tb927.8.3630;Tb927.8.3620;Tb11.v5.0766	Tb927.8.3630;Tb927.8.3620;Tb11.v5.0766		folate transporter, putative,expression site-associated gene 10 (ESAG10) protein, putative;folate transporter, putative,expression site-associated gene 10 (ESAG10) protein, putative;folate transporter, putative	69.808	10.4	0	4.8043	3		0.970814	-0.0128642	0.683845	0.165042		6.2	2	1	0.834446	0.977422	-0.00991811	NaN	1	10.4	4	1	0.792	0.88287	-0.0541032	NaN	1	7.8	3	1	0.99669	1.0603	0.0254288	NaN	1
	2140	Tb927.9.12150	Tb927.9.12150		transport protein particle (TRAPP) subunit, putative	23.01	10.4	0	3.8858	1		0.863212	-0.0638825	0.842313	0.0745264		0	0	0	NaN	NaN		NaN	0	5.4	1	1	0.83177	0.93462	-0.0293649	NaN	1	10.4	2	2	0.73855	0.79726	-0.0984	28.892	3
	2166	Tb927.9.13540	Tb927.9.13540		hypothetical protein, conserved	41.261	10.4	0	19.024	1	1	0.958772	-0.0182846	0.830565	0.0806264		7.3	2	2	0.748671	0.899038	-0.046222	9.3865	3	4.2	1	1	0.89771	1.008	0.00346053	2.7662	2	10.4	3	3	0.89925	0.97254	-0.0120925	23.15	4
	1760	Tb927.7.2720	Tb927.7.2720		hypothetical protein, conserved	74.108	10.4	0	48.734	1		0.896053	-0.0476664	0.918394	0.0369709		6.8	3	3	0.679532	0.813273	-0.0897638	12.407	4	7.1	3	3	0.82081	0.91618	-0.0380192	15.227	6	3.5	2	2	0.88915	0.96557	-0.0152162	2.7832	3
	427	Tb927.10.15310	Tb927.10.15310		hypothetical protein, conserved	47.654	10.4	0	5.4954	1		1.0356	0.015192				0	0	0	NaN	NaN		NaN	0	0	0	0	NaN	NaN		NaN	0	10.4	3	3	0.94823	1.0356	0.015192	2.5392	2
	1842	Tb927.7.5760	Tb927.7.5760	NFT2	nuclear transport factor 2 protein, putative (NFT2)	15.812	10.4	0.0062222	1.8783	1			NaN				0	0	0	NaN	NaN		NaN	0	0	0	0	NaN	NaN		NaN	0	10.4	1	1	NaN	NaN		NaN	0
	1484	Tb927.5.1620	Tb927.5.1620		hypothetical protein, conserved	28.139	10.3	0	18.491	1		1.63848	0.214441	0.117652	0.9294		6.3	1	1	NaN	NaN		NaN	0	4	1	1	1.7725	1.9839	0.29752	NaN	1	6.3	1	1	1.2596	1.3532	0.131362	NaN	1
	326	Tb927.10.11520	Tb927.10.11520	TbTim13	hypothetical protein, conserved	13.421	10.3	0	5.5257	1	1	1.33869	0.126679	0.202452	0.693679		10.3	1	1	1.38236	1.66041	0.220216	NaN	1	0	0	0	NaN	NaN		NaN	0	10.3	1	1	0.99558	1.0793	0.0331422	NaN	1
	296	Tb927.10.10410;Tb11.v5.0535	Tb927.10.10410		DNA replication licensing factor MCM8, putative	77.53	10.3	0	17.88	2		1.16332	0.0656977	0.215965	0.665617		8.6	5	5	0.781922	0.9273	-0.0327799	135.99	6	4.8	3	3	1.373	1.5646	0.194403	67.435	2	3.5	2	2	0.99331	1.0851	0.0354698	2.7648	2
	2064	Tb927.8.6860	Tb927.8.6860		hypothetical protein, conserved	81.647	10.3	0	21.34	1		1.07089	0.0297444	0.194534	0.711004		10.3	6	6	0.856238	1.0061	0.00263985	9.0022	6	5.1	3	3	1.0711	1.2141	0.0842545	19.146	3	7.4	4	4	0.92646	1.0054	0.00233888	5.0462	4
	1247	Tb927.3.2180	Tb927.3.2180		hypothetical protein, conserved	17.908	10.3	0	42.938	1	1	1.01987	0.00854283	0.441833	0.354742		10.3	1	1	1.07676	1.28401	0.108568	11.964	2	10.3	1	1	0.83711	0.95573	-0.0196648	2.0806	2	10.3	1	1	0.79112	0.86442	-0.0632752	11.649	3
	2099	Tb927.8.860	Tb927.8.860		hypothetical protein, conserved	25.908	10.3	0	3.9752	1		0.883258	-0.0539124	0.859262	0.0658746		6.2	1	1	0.699203	0.832847	-0.0794345	NaN	1	0	0	0	NaN	NaN		NaN	0	10.3	2	2	0.86123	0.93672	-0.0283902	4.4978	2
	1829	Tb927.7.5230	Tb927.7.5230		lanosterol synthase	103.03	10.3	0	21.884	1		1.04349	0.0184889	0.225307	0.647226		2.2	2	2	0.863931	1.03159	0.0135059	6.8515	2	6.8	5	5	1.007	1.1354	0.0551489	71.603	5	3.4	3	3	0.89532	0.97009	-0.013188	11.462	3
	707	Tb927.11.10770	Tb927.11.10770		hypothetical protein, conserved	48.943	10.3	0	14.25	1		0.94663	-0.0238195	0.722376	0.141236		1.7	1	1	0.717875	0.842815	-0.0742677	NaN	1	5.5	2	2	0.97745	1.0982	0.0406814	10.587	2	6.6	2	2	0.85716	0.91649	-0.0378723	23.977	2
	2186	Tb927.9.14290	Tb927.9.14290		hypothetical protein, conserved	49.833	10.3	0	29.076	1		0.933602	-0.0298383	0.75635	0.121277		10.3	2	2	0.818867	0.96302	-0.0163647	NaN	1	10.3	2	2	0.7086	0.80048	-0.0966495	0.099365	2	3.4	1	1	0.98812	1.0556	0.0234994	18.572	2
	323	Tb927.10.11370	Tb927.10.11370		hypothetical protein, conserved	17.772	10.3	0	6.4279	1	1	0.930148	-0.0314478	0.844725	0.0732847		0	0	0	NaN	NaN		NaN	0	10.3	1	1	0.7966	0.89509	-0.0481333	17.695	2	10.3	1	1	0.88107	0.96658	-0.0147622	NaN	1
	447	Tb927.10.1630	Tb927.10.1630	ABCE1	unspecified product (RLI)	71.078	10.3	0	22.776	1		0.955997	-0.0195435	0.717435	0.144217		3.2	2	2	0.901307	1.0569	0.0240355	9.1444	2	4.8	2	2	0.73991	0.84438	-0.0734621	11.674	2	10.3	5	5	0.89802	0.97903	-0.009204	31.152	6
	527	Tb927.10.4040	Tb927.10.4040		3-keto-dihydrosphingosine reductase	38.045	10.3	0	7.9997	1		1.00877	0.00379134	0.377289	0.423325		5.7	2	2	0.813736	0.975895	-0.0105968	0.39779	2	4.9	2	2	0.93924	1.0579	0.0244446	NaN	1	8.3	3	3	0.91724	0.99432	-0.00247382	3.6977	3
	894	Tb927.11.17010	Tb927.11.17010		hypothetical protein, conserved	11.4	10.3	0.0018382	2.2072	1		0.77355	-0.111512				0	0	0	NaN	NaN		NaN	0	0	0	0	NaN	NaN		NaN	0	10.3	1	1	0.71064	0.77355	-0.111512	NaN	1
	1761	Tb927.7.2780	Tb927.7.2780		hypothetical protein, conserved	12.723	10.3	0	3.1042	1		0.55358	-0.25682				0	0	0	NaN	NaN		NaN	0	10.3	1	1	0.49341	0.55358	-0.25682	NaN	1	0	0	0	NaN	NaN		NaN	0
	2086	Tb927.8.8040	Tb927.8.8040		kinetoplastid-specific phospho-protein phosphatase, putative	27.096	10.3	0	3.9009	1		0.85124	-0.069948				0	0	0	NaN	NaN		NaN	0	10.3	1	1	0.75198	0.85124	-0.069948	NaN	1	0	0	0	NaN	NaN		NaN	0
	475	Tb927.10.2490	Tb927.10.2490	G6PD	glucose-6-phosphate 1-dehydrogenase (G6PD)	63.503	10.2	0	12.516	1		1.05382	0.0227656	0.326508	0.486107		1.6	1	1	0.854336	1.02916	0.0124812	NaN	1	8.6	3	3	0.78634	0.89758	-0.0469268	6.8278	3	5.4	2	2	1.155	1.2669	0.102742	36.638	3
	1090	Tb927.11.8770	Tb927.11.8770		ATP-dependent RNA helicase FAL1, putative	45.516	10.2	0	22.51	1		1.05241	0.022183	0.236797	0.625624		4.2	2	2	0.786473	0.938086	-0.0277572	3.5445	2	8	3	3	1.0158	1.1339	0.0545748	6.5347	3	10.2	4	4	1.0112	1.0958	0.0397313	3.8914	4
	610	Tb927.10.7480	Tb927.10.7480		hypothetical protein, conserved	22.139	10.2	0	10.856	1		0.845344	-0.0729665	0.665092	0.177118		5.1	1	1	0.965997	1.13468	0.0548715	NaN	1	0	0	0	NaN	NaN		NaN	0	5.1	1	1	0.58758	0.62979	-0.200804	4.4159	2
	205	Tb927.2.830;Tb11.v5.0655;Tb927.1.240	Tb927.2.830;Tb11.v5.0655		retrotransposon hot spot protein (RHS, pseudogene), putative,retrotransposon hot spot protein 1 (RHS1), interrupted;hypothetical protein, conserved	40.504	10.2	0.00049285	3.0166	3		1.04306	0.0183075	0.300335	0.522394		8	2	1	1.00078	1.19069	0.0757983	NaN	1	10.2	3	1	0.88822	1.0061	0.00264115	NaN	1	10.2	3	1	0.88018	0.94729	-0.023517	NaN	1
	1389	Tb927.4.2440	Tb927.4.2440		hypothetical protein, conserved	44.263	10.2	0	8.0526	1	1	0.974799	-0.0110851	0.83646	0.0775547		7	1	1	0.79968	0.941797	-0.0260427	NaN	1	10.2	2	2	0.85582	0.97495	-0.0110177	0.2153	2	7	1	1	0.92463	1.0088	0.00380507	NaN	1
	2019	Tb927.8.5610	Tb927.8.5610		hypothetical protein, conserved	54.81	10.2	0	19.689	1		0.923158	-0.034724	0.877634	0.0566865		10.2	4	4	0.822978	0.978091	-0.00962083	13.2	3	8	3	3	0.75068	0.83734	-0.0770982	18.281	3	5.6	2	2	0.87915	0.96061	-0.0174529	10.029	2
	1223	Tb927.3.1620	Tb927.3.1620		hypothetical protein, conserved	174.37	10.2	0	45.98	1		0.956337	-0.0193891	0.938808	0.027423		6.7	9	9	0.793147	0.951656	-0.0215201	27.877	9	5.6	7	7	0.88842	0.98745	-0.00548489	10.908	7	7.8	10	10	0.86277	0.93076	-0.0311623	18.954	10
	342	Tb927.10.1230	Tb927.10.1230		hypothetical protein, conserved	37.682	10.2	0	10.273	1		1.01777	0.00764979	0.192165	0.716326		10.2	3	3	0.867077	1.02946	0.0126107	6.9102	3	7.9	2	2	0.91751	1.0384	0.0163647	15.256	3	5.8	2	2	0.9045	0.98622	-0.00602619	43.306	2
	604	Tb927.10.7290	Tb927.10.7290		hypothetical protein, conserved	129.88	10.2	0	34.502	1		1.02007	0.00863137	0.356734	0.447655		7.2	5	5	0.930665	1.11236	0.046245	19.923	7	7.5	5	5	0.89567	1.0082	0.00354669	11.865	5	5.5	4	4	0.89404	0.94646	-0.0238977	20.846	6
	596	Tb927.10.6840	Tb927.10.6840		hypothetical protein, conserved	34.255	10.2	0	13.09	1		2.0041	0.301919				0	0	0	NaN	NaN		NaN	0	10.2	2	2	1.7832	2.0041	0.301919	78.197	2	0	0	0	NaN	NaN		NaN	0
	221	Tb11.v5.0859;Tb927.10.14240	Tb11.v5.0859;Tb927.10.14240	NMT	N-myristoyl transferase, putative;N-myristoyltransferase (NMT)	43.077	10.1	0	11.662	2		1.13487	0.0549444	0.238871	0.621836		7.7	2	2	1.29403	1.51846	0.181405	33.402	3	8.2	2	2	0.86197	0.96112	-0.0172224	13.92	2	4.2	2	2	0.93339	1.0015	0.000650954	0.88394	2
	2105	Tb927.9.10080	Tb927.9.10080		phosphatidylserine decarboxylase, putative	39.735	10.1	0.0014472	2.6905	1	1	1.08849	0.0368254	0.403359	0.394308		3.7	1	1	1.20334	1.42682	0.154369	NaN	1	4.2	1	1	0.7398	0.83039	-0.0807179	NaN	1	2.2	1	1	NaN	NaN		NaN	0
	379	Tb927.10.13600	Tb927.10.13600		hypothetical protein, conserved,hypothetical protein	18.522	10.1	0	3.5807	1	1	1.03708	0.0158138	0.461777	0.335568		10.1	1	1	0.643377	0.76693	-0.115244	NaN	1	10.1	1	1	1.225	1.4024	0.146872	9.2772	2	0	0	0	NaN	NaN		NaN	0
	953	Tb927.11.3690	Tb927.11.3690		hypothetical protein, conserved	41.465	10.1	0	5.6633	1	1	0.992126	-0.0034332	0.520248	0.28379		5.6	2	2	0.637024	0.758783	-0.119882	13.524	2	10.1	3	3	0.94945	1.0726	0.0304378	7.3591	3	5.6	2	2	1.1157	1.1999	0.0791451	33.82	2
	2104	Tb927.9.10050	Tb927.9.10050		hypothetical protein, conserved	46.936	10.1	0	9.8093	1	1	0.879748	-0.0556417	0.804906	0.0942548		7.3	3	3	0.791515	0.929109	-0.0319333	3.1471	3	5.2	2	2	0.62372	0.70202	-0.153651	70.206	2	10.1	4	4	0.97208	1.0439	0.0186589	11.557	4
	1211	Tb927.3.1030	Tb927.3.1030	RPB28	RNA-binding protein (RPB28)	39.272	10.1	0	6.9521	1		0.994149	-0.00254848	0.544307	0.264156		10.1	3	3	0.784314	0.908265	-0.0417873	NaN	1	6.4	2	2	0.94357	1.0612	0.0257972	5.2797	2	6.4	2	2	0.92889	1.0194	0.00834463	NaN	1
	1079	Tb927.11.8120	Tb927.11.8120		protein transport protein SEC13, putative	35.125	10.1	0.004955	1.9957	1		0.62992	-0.200715				3.7	1	1	NaN	NaN		NaN	0	3.7	1	1	NaN	NaN		NaN	0	6.4	1	1	0.5878	0.62992	-0.200715	NaN	1
	1961	Tb927.8.3160	Tb927.8.3160		hypothetical protein, conserved	18.646	10	0	5.5458	1		1.14239	0.0578145	0.152962	0.815417		10	1	1	1.05002	1.22449	0.0879535	NaN	1	0	0	0	NaN	NaN		NaN	0	10	1	1	1	1.0658	0.0276757	NaN	1
	1992	Tb927.8.4620	Tb927.8.4620	Trab7	small GTP-binding protein Rab7, putative (Trab7)	24.741	10	0.0018613	2.331	1		1.16919	0.0678853	0.317273	0.498566		10	2	2	1.25489	1.48887	0.172857	77.919	2	0	0	0	NaN	NaN		NaN	0	5	1	1	0.86008	0.91815	-0.0370864	NaN	1
	869	Tb927.5.1110;Tb927.11.16280	Tb927.5.1110;Tb927.11.16280		60S ribosomal protein L2, putative,60S ribosomal protein L8, putative;60S ribosomal protein L2, putative,60S ribosomal protein L8, putative	28.314	10	0	11.543	2		1.06505	0.0273699	0.41104	0.386116		10	1	1	0.725742	0.855066	-0.0680002	NaN	1	0	0	0	NaN	NaN		NaN	0	10	1	1	1.2205	1.3266	0.12274	NaN	1
	1672	Tb927.6.4460;Tb927.6.4410	Tb927.6.4460;Tb927.6.4410	AdoMetDC;AdoMetDC	S-adenosylmethionine decarboxylase (AdoMetDC);S-adenosylmethionine decarboxylase (AdoMetDC)	41.748	10	0.0049505	1.9882	2		1.04122	0.0175428	0.404645	0.392926		3.8	1	1	0.775615	0.913576	-0.0392554	NaN	1	6.2	1	1	1.0604	1.1867	0.0743409	NaN	1	0	0	0	NaN	NaN		NaN	0
	813	Tb927.11.14380	Tb927.11.14380	KPAF2	kinetoplast polyadenylation/uridylation factor 2	72.496	10	0	18.028	1	1	1.05117	0.0216735	0.34089	0.467385		5.3	3	3	0.711086	0.857045	-0.0669964	11.346	3	2	1	1	0.9895	1.1146	0.047119	NaN	1	10	5	5	1.1294	1.2159	0.0848979	15.855	5
	1566	Tb927.5.860	Tb927.5.860	SelT	selenoprotein, putative (SelT)	28.792	10	0	5.0049	1		0.829271	-0.0813034	0.738608	0.131586		6.9	1	1	0.569282	0.678196	-0.168645	NaN	1	10	2	2	0.89611	1.014	0.00603795	0.94738	2	0	0	0	NaN	NaN		NaN	0
	1214	Tb927.3.1140	Tb927.3.1140		hypothetical protein, conserved	43.463	10	0	9.3521	1		0.932385	-0.0304046	0.667703	0.175417		4.6	1	1	0.616371	0.724795	-0.139785	NaN	1	4.6	1	1	0.8452	0.95486	-0.0200603	NaN	1	10	3	3	1.0954	1.1712	0.0686311	24.843	2
	1027	Tb927.11.6100	Tb927.11.6100		hypothetical protein, conserved	33.374	10	0	7.2014	1	1	1.05645	0.0238485	0.240358	0.619142		5	1	1	1.00861	1.18967	0.0754261	NaN	1	5	1	1	0.84991	0.95565	-0.0197011	NaN	1	5	1	1	0.95592	1.0371	0.0158206	NaN	1
	109	Tb11.02.5070b;Tb927.11.7212	Tb11.02.5070b;Tb927.11.7212		hypothetical protein, conserved;hypothetical protein, conserved	32.082	10	0	3.9361	2	1	0.956073	-0.0195091	0.655182	0.183638		3.8	1	1	0.682268	0.802762	-0.0954135	NaN	1	7.2	2	2	0.85548	0.96889	-0.0137255	14.292	2	6.5	2	2	1.0459	1.1236	0.0506117	10.987	2
	1439	Tb927.4.4490	Tb927.4.4490	MRPE	multidrug resistance protein E,p-glycoprotein (MRPE)	193.8	10	0	35.786	1		0.978188	-0.00957773	0.601681	0.220634		4.7	6	6	0.709975	0.843668	-0.0738283	25.75	5	6.4	7	7	0.95298	1.077	0.0322157	21.583	7	5.2	7	7	0.94657	1.0301	0.0128794	13.505	7
	399	Tb927.10.14150	Tb927.10.14150		hypothetical protein, conserved	55.311	10	0	22.366	1		1.03746	0.0159724	0.140819	0.85134		8.4	3	3	0.883783	1.04771	0.0202423	24.545	3	6.3	2	2	0.96259	1.0775	0.0324173	4.0057	3	10	4	4	0.91395	0.98914	-0.00474224	5.2689	5
	344	Tb927.10.12360	Tb927.10.12360		hypothetical protein, conserved	18.601	10	0	25.084	1		0.949422	-0.0225406	0.808176	0.0924939		10	1	1	0.884956	1.02961	0.0126736	NaN	1	10	1	1	0.84044	0.94967	-0.0224273	6.3087	2	10	1	1	0.82083	0.87525	-0.0578679	NaN	1
	1181	Tb927.2.4400	Tb927.2.4400		hypothetical protein, conserved	136.9	10	0	19.852	1	1	1.01057	0.00456511	0.418006	0.378817		7.9	5	5	0.902039	1.08508	0.0354622	15.286	6	4.4	3	3	0.90321	1.0221	0.00949339	40.282	3	7.5	6	6	0.87069	0.93055	-0.0312603	7.3085	6
	1969	Tb927.8.3450	Tb927.8.3450		hypothetical protein, conserved	16.536	10	0	3.5246	1	1	1.017	0.00732094				0	0	0	NaN	NaN		NaN	0	0	0	0	NaN	NaN		NaN	0	10	1	1	0.93116	1.017	0.00732095	NaN	1
	983	Tb927.11.4850	Tb927.11.4850		hypothetical protein, conserved	50.425	9.9	0	6.5137	1	1	0.847337	-0.0719438	0.702357	0.153442		4.3	1	1	0.597764	0.676956	-0.169439	NaN	1	9.9	2	2	0.91209	1.0606	0.0255516	28.85	2	0	0	0	NaN	NaN		NaN	0
	1874	Tb927.7.7090	Tb927.7.7090		hypothetical protein, conserved	17.127	9.9	0	16.266	1	1	1.00851	0.00368039	0.464317	0.333185		9.9	1	1	0.949577	1.13421	0.0546939	NaN	1	9.9	1	1	0.76357	0.85755	-0.0667405	30.857	2	9.9	1	1	0.97328	1.0546	0.0230878	NaN	1
	1591	Tb927.6.1840	Tb927.6.1840		hypothetical protein, conserved	36.741	9.9	0	10.6	1	1	0.810184	-0.0914163	0.812553	0.0901484		0	0	0	NaN	NaN		NaN	0	7.3	2	2	0.82282	0.93249	-0.0303558	26.552	2	2.6	1	1	0.64939	0.70392	-0.152477	NaN	1
	122	Tb927.10.15270;Tb11.v5.0998;Tb11.1240	Tb927.10.15270;Tb11.v5.0998;Tb11.1240		methionine aminopeptidase, putative,metallo- peptidase, Clan MG, Family M24;methionine aminopeptidase, putative;hypothetical protein,chrXI additional, unordered contigs	43.784	9.9	0.0075221	1.8518	3		0.773072	-0.11178	0.888021	0.0515769		0	0	0	NaN	NaN		NaN	0	5.3	1	1	0.61607	0.70338	-0.15281	NaN	1	4.6	1	1	0.78561	0.84967	-0.0707497	NaN	1
	776	Tb927.11.13290	Tb927.11.13290	TbTim17	mitochondrial import inner membrane translocase subunit tim17 (Tim17)	16.296	9.9	0	6.574	1	1	0.524553	-0.28021	0.986794	0.00577368		9.9	1	1	0.45159	0.538793	-0.268578	NaN	1	9.9	1	1	0.45175	0.51069	-0.291843	NaN	1	0	0	0	NaN	NaN		NaN	0
	1121	Tb927.11.9580.1;Tb927.11.9580.2	Tb927.11.9580.1;Tb927.11.9580.2		unspecified product;unspecified product	13.556	9.9	0	4.0683	2		1.1468	0.0594877				0	0	0	NaN	NaN		NaN	0	0	0	0	NaN	NaN		NaN	0	9.9	1	1	1.0542	1.1468	0.0594877	12.706	2
	542	Tb927.10.4640	Tb927.10.4640	EIF3L	eukaryotic translation initiation factor 3 subunit L, putative	55.649	9.8	0	10.524	1		1.24375	0.0947329	0.129694	0.88708		4.7	1	1	1.15373	1.36653	0.135619	NaN	1	9.8	3	3	0.98549	1.132	0.0538464	24.352	3	0	0	0	NaN	NaN		NaN	0
	850	Tb927.11.15760	Tb927.11.15760	TTA1	GPI transamidase subunit Tta1 (TTA1)	41.915	9.8	0	14.074	1		1.19171	0.0761722	0.0812546	1.09015		6.6	2	2	0.944198	1.11918	0.0489007	NaN	1	3.4	1	1	1.2134	1.3993	0.145911	NaN	1	9.8	3	3	0.99845	1.0807	0.0337052	2.5042	3
	468	Tb927.10.230	Tb927.10.230		proteasome alpha 5 subunit, putative,20S proteasome subunit alpha 5	27.176	9.8	0	10.458	1		1.12731	0.0520416	0.222784	0.652116		0	0	0	NaN	NaN		NaN	0	4.5	1	1	0.91298	1.0191	0.0082168	1.3314	2	9.8	2	2	1.1489	1.247	0.0958665	0.27378	2
	1002	Tb927.11.5440	Tb927.11.5440		malic enzyme	61.506	9.8	0	14.043	1		1.06508	0.0273802	0.16207	0.790296		4.8	2	2	0.880437	1.03943	0.0167932	4.9154	2	9.8	4	4	0.87267	0.99374	-0.00272723	14.381	5	6.6	3	3	1.0901	1.1697	0.0680745	18.679	3
	1224	Tb927.3.1630	Tb927.3.1630	CK1	casein kinase 1, putative (CK1)	45.179	9.8	0	5.4568	1		1.00383	0.00166069	0.490003	0.309801		3.5	1	1	0.718907	0.856898	-0.0670709	NaN	1	3.5	1	1	1.157	1.3137	0.118496	NaN	1	9.8	3	3	0.819	0.89858	-0.0464433	49.684	3
	2142	Tb927.9.12320	Tb927.9.12320		cystathione gamma lyase, putative	44.716	9.8	0	27.695	1		0.784083	-0.105638	0.860469	0.0652646		6.6	2	2	0.905059	1.09091	0.0377869	11.091	2	7.6	2	2	0.58103	0.65528	-0.183573	55.889	2	7.6	2	2	0.62593	0.67433	-0.171128	68.895	2
	1821	Tb927.7.4800	Tb927.7.4800		hypothetical protein, conserved	12.152	9.7	0.0014124	2.445	1	1	0.995486	-0.00196493	0.51314	0.289764		9.7	1	1	0.940734	1.11073	0.0456081	NaN	1	9.7	1	1	0.78602	0.8922	-0.0495378	NaN	1	0	0	0	NaN	NaN		NaN	0
	498	Tb927.10.3200	Tb927.10.3200	U2AF35	U2 splicing auxiliary factor, putative (U2AF35)	29.114	9.7	0	6.12	1		0.965318	-0.0153297	0.595937	0.2248		9.7	2	2	1.00997	1.19877	0.0787351	8.1198	2	9.7	2	2	0.86667	0.97385	-0.0115079	6.8396	2	6.5	1	1	0.71787	0.77052	-0.113216	NaN	1
[truncated: 815 more rows]
