# Supplementary material for: Homologue replacement in the import motor of the mitochondrial inner membrane of trypanosomes
Source: eLife. 2020 Feb 27;9:e52560. doi: 10.7554/eLife.52560 (PMC7064343; doi:10.7554/eLife.52560)
Supplement: Figure 3—source data 3. [file elife-52560-fig3-data3.xlsx]

## Sheet: TbPAM18-HA SILAC-IPs
	Figure 3 - Source Data 3: List of proteins identified in SILAC-AP-MS experiments of TbPam18-HA complexes
												Data determined across Replicates 1 - 3									Replicate 1								Replicate 2								Replicate 3
	Protein Group ID	Protein IDs	Majority Protein IDs	Gene Name	Protein Description	Mol. Weight [kDa]	Sequence Coverage [%]	Q-Value	Score	# of Proteins in Protein Group	Mitochondrial Proteome (acc. to Peikert et al., 2017)	Enrichment Factor	Mean log10 TbPam18-HA/Ctrl normalized	p-Value	-log10 p-Value	p-Value < 0.05	Sequence Coverage [%]	Peptides	Unique Peptides	Ratio TbPam18-HA/Ctrl	Ratio TbPam18-HA/Ctrl normalized	log10 Ratio TbPam18-HA/Ctrl normalized	Ratio Variability [%]	SILAC Peptide Pairs	Sequence Coverage [%]	Peptides	Unique Peptides	Ratio TbPam18-HA/Ctrl	Ratio TbPam18-HA/Ctrl normalized	log10 Ratio TbPam18-HA/Ctrl normalized	Ratio Variability [%]	SILAC Peptide Pairs	Sequence Coverage [%]	Peptides	Unique Peptides	Ratio TbPam18-HA/Ctrl	Ratio TbPam18-HA/Ctrl normalized	log10 Ratio TbPam18-HA/Ctrl normalized	Ratio Variability [%]	SILAC Peptide Pairs
	2139	Tb927.8.6310	Tb927.8.6310	TbPAM18	hypothetical protein, conserved	13.302	48.3	0	112.1	1	1	26.3169	1.42023	0.00454421	2.34254	+	47.5	4	4	18.8701	17.2221	1.23609	89.129	6	48.3	5	5	17.474	21.786	1.33818	30.505	10	45.8	3	3	33.605	48.578	1.68644	117.81	6
	731	Tb927.11.10690	Tb927.11.10690		hypothetical protein, conserved	45.229	47.8	0	210.4	1		15.9662	1.2032	0.000596948	3.22406	+	45.1	11	11	14.3146	13.1822	1.11999	126.43	11	41.9	10	10	14.034	17.614	1.24586	257.66	15	45.1	11	11	12.22	17.529	1.24376	74.871	12
	2351	Tb927.9.4500	Tb927.9.4500		heat shock protein, putative,HSP70-like protein	91.117	36.5	0	286.35	1		11.1623	1.04775	0.00030702	3.51283	+	32.9	23	23	12.2166	11.2124	1.0497	16.108	31	32	23	23	7.9996	10.042	1.00182	101.7	34	28.6	17	17	8.5159	12.352	1.09174	37.616	24
	574	Tb927.10.5400	Tb927.10.5400		hypothetical protein, conserved	63.396	16.7	0	156.55	1		11.1614	1.04772	0.000370119	3.43166	+	16.7	8	8	12.4213	11.3682	1.05569	3.69	9	14.5	5	5	7.6974	9.8814	0.994818	3.8148	6	12.5	4	4	8.6209	12.378	1.09265	11.547	4
	476	Tb927.10.210	Tb927.10.210	TbGAA1	GPI transamidase component GAA1 (TbGAA1)	51.313	11.1	0	25.14	1		9.38931	0.972634	0.00154355	2.81148	+	5.2	2	2	9.5511	8.78966	0.943972	21.616	2	11.1	3	3	6.2926	7.8793	0.896488	8.0649	4	11.1	3	3	8.3094	11.952	1.07744	18.578	2
	1648	Tb927.5.910	Tb927.5.910		oligosaccharyl transferase subunit, putative	92.296	16.3	0	8.7717	1		8.38532	0.92352	8.09745e-05	4.09165	+	14.5	11	1	8.95255	7.98276	0.902153	0.22426	2	11.1	7	1	6.5034	8.4278	0.925714	NaN	1	10.7	8	1	6.0505	8.7638	0.942692	NaN	1
	1490	Tb927.4.3820	Tb927.4.3820		hypothetical protein, conserved	47.456	10.6	0	11.321	1		7.99348	0.902736	0.0122871	1.91055	+	10.6	3	3	17.2005	15.5017	1.19038	31.736	3	10.6	3	3	4.7339	5.979	0.776629	8.177	3	6.8	2	2	3.8484	5.5106	0.741199	NaN	1
	1647	Tb927.5.900;Tb11.v5.0559;Tb11.v5.0558;Tb927.5.880	Tb927.5.900;Tb11.v5.0559		oligosaccharyl transferase subunit, putative;oligosaccharyl transferase subunit, putative	92.232	15.5	0	125.85	4		6.64822	0.822706	0.00308375	2.51092	+	13.6	11	1	5.43036	5.00626	0.699513	28.301	2	10.2	7	1	5.7007	7.0605	0.848835	4.9106	2	9.9	8	1	5.7599	8.3132	0.919768	NaN	1
	403	Tb927.10.13860	Tb927.10.13860		GPI-anchor transamidase subunit 8 (GPI8)	36.798	30.7	0	59.216	1		6.06569	0.782881	0.00107082	2.97029	+	30.1	7	7	5.69444	5.15358	0.712109	11.214	6	30.4	8	8	5.4093	6.7951	0.832196	3.8002	8	24.1	7	7	4.3342	6.3729	0.804337	17.428	6
	1436	Tb927.4.1920	Tb927.4.1920	TbGPI16	GPI transamidase, putative (TbGPI16)	75.806	18.7	0	210.53	1		5.98245	0.776879	0.000425027	3.37158	+	18.7	7	7	6.03938	5.40278	0.732617	16.207	8	18.7	7	7	4.928	6.1736	0.790538	13.887	7	17.3	6	6	4.4561	6.4192	0.807481	8.8793	6
	739	Tb927.11.10920	Tb927.11.10920		hypothetical protein, conserved	36.52	8.8	0	13.646	1		5.90446	0.77118	0.00249725	2.60254	+	5	1	1	5.04388	4.5939	0.662181	NaN	1	8.8	2	2	5.2467	6.5683	0.817453	2.344	2	8.8	2	2	4.6975	6.8219	0.833905	NaN	1
	879	Tb927.11.15760	Tb927.11.15760	TTA1	GPI transamidase subunit Tta1 (TTA1)	41.915	9.8	0	16.146	1		5.72336	0.757651	0.000219222	3.65912	+	9.8	3	3	6.54922	5.93683	0.773555	2.6087	3	6.6	2	2	4.7494	5.9359	0.773487	9.2207	2	6.6	2	2	3.6796	5.32	0.725912	26.202	2
	623	Tb927.10.7270	Tb927.10.7270		hypothetical protein, conserved	56.815	4	0	44.666	1		5.67843	0.754229	0.0167344	1.77639	+	4	1	1	5.08647	4.61404	0.664081	NaN	1	4	1	1	2.9391	3.6887	0.566873	NaN	1	4	1	1	7.3337	10.758	1.03173	NaN	1
	452	Tb927.10.15600	Tb927.10.15600		FKBP-type peptidyl-prolyl cis-trans isomerase, conserved,FKBP-type peptidylprolyl cis-trans isomerase, putative	36.542	19.2	0	11.087	1		5.50435	0.740706	0.0206158	1.6858	+	7.5	2	2	2.93324	2.70746	0.432562	114.13	2	10.8	3	3	5.7938	7.2737	0.861755	49.402	3	4.2	1	1	5.7584	8.4684	0.927801	NaN	1
	1022	Tb927.11.4760	Tb927.11.4760		hypothetical protein	29.673	17.6	0	23.11	1		5.13139	0.710235	0.0021927	2.65902	+	17.6	3	3	4.68867	4.30256	0.633727	72.871	2	17.6	3	3	3.9945	5.0192	0.700635	33.284	2	17.6	3	3	4.3276	6.2567	0.796345	48.125	3
	1946	Tb927.7.5870	Tb927.7.5870		hypothetical protein, conserved	23.596	10.1	0.0059855	2.1541	1		4.49779	0.652999	0.0152931	1.81551	+	0	0	0	NaN	NaN		NaN	0	10.1	1	1	3.8882	4.835	0.684396	NaN	1	10.1	1	1	2.873	4.1841	0.621602	NaN	1
	2055	Tb927.8.2910;Tb927.8.2900;Tb927.8.2930;Tb927.8.2920	Tb927.8.2910;Tb927.8.2900;Tb927.8.2930;Tb927.8.2920		mannosyl-oligosaccharide 1,2-alpha-mannosidase IB, putative;mannosyl-oligosaccharide 1,2-alpha-mannosidase IB (pseudogene), putative,mannosyl-oligosaccharide 1,2-alpha-mannosidase IB, fragment;mannosyl-oligosaccharide 1,2-alpha-mannosidase IB, putative;	65.812	8.5	0	18.203	4		4.02787	0.605076	0.00736527	2.13281	+	8.5	4	4	3.13539	2.86172	0.456627	26.334	4	6.8	3	3	3.9161	4.8231	0.683326	19.354	3	5.3	2	2	3.2662	4.7345	0.675274	15.065	2
	2296	Tb927.9.15090	Tb927.9.15090		cytosolic coat protein, putative	24.595	33.3	0	46.872	1		3.96445	0.598183	9.00036e-05	4.04574	+	33.3	6	6	4.16372	3.82058	0.58213	82.876	10	28.3	5	5	3.2156	4.0394	0.606317	54.551	7	20.5	3	3	2.806	4.0374	0.606102	7.8883	5
	1558	Tb927.5.1620	Tb927.5.1620		hypothetical protein, conserved	28.139	13.1	0	38.983	1		3.83009	0.583209	0.00781164	2.10726	+	13.1	3	3	3.07182	2.83986	0.453297	55.468	3	13.1	3	3	3.0516	3.8692	0.587621	103.18	3	13.1	3	3	3.4682	5.1134	0.70871	16.618	3
	813	Tb927.11.13520	Tb927.11.13520		hypothetical protein, conserved	105.38	13.2	0	62.176	1		3.78728	0.578328	0.000527861	3.27748	+	13.2	8	8	3.84897	3.49675	0.543664	19.694	8	10.9	6	6	3.0495	3.8284	0.583017	7.7936	6	9.3	5	5	2.7752	4.0579	0.608301	6.1006	5
	717	Tb927.11.10220	Tb927.11.10220		hypothetical protein, conserved	12.738	21.2	0	9.6403	1		3.57103	0.552794	0.000187446	3.72712	+	21.2	2	2	3.71278	3.40136	0.531653	9.2301	2	21.2	2	2	2.9288	3.6839	0.566308	15.579	2	21.2	2	2	2.5039	3.6343	0.560421	2.0257	2
	733	Tb927.11.10700	Tb927.11.10700		hypothetical protein, conserved	29.716	14.9	0	15.908	1		3.53414	0.548284	0.00531806	2.27425	+	3.1	1	1	4.14886	3.77915	0.577394	NaN	1	14.9	3	3	2.1762	2.7433	0.438273	6.0682	3	11.8	2	2	2.9717	4.2578	0.629185	11.01	2
	2004	Tb927.8.1250	Tb927.8.1250		hypothetical protein, conserved	89.043	10.1	0	60.749	1		3.5121	0.545567	0.00191515	2.7178	+	10.1	6	6	3.37587	3.07683	0.488103	19.101	6	8.8	5	5	2.7868	3.4935	0.543261	45.351	6	5.2	3	3	2.7944	4.0303	0.605337	56.896	3
	722	Tb927.11.10370	Tb927.11.10370		glycosyl hydrolase-like protein	118.83	14.4	0	56.686	1		3.4752	0.54098	0.005394	2.26809	+	10.4	9	9	4.9586	4.50918	0.654097	17.272	8	8.5	6	6	2.504	3.0899	0.489944	126.57	6	8.2	6	6	2.0856	3.0123	0.478898	21.795	5
	1164	Tb927.11.9580.1;Tb927.11.9580.2	Tb927.11.9580.1;Tb927.11.9580.2		unspecified product;unspecified product	13.556	9.9	0.0023375	3.0952	2		3.36213	0.526615	0.00198294	2.70269	+	9.9	1	1	3.29348	2.98981	0.475643	NaN	1	9.9	1	1	3.1116	3.8826	0.589123	NaN	1	9.9	1	1	2.2866	3.274	0.515079	NaN	1
	1670	Tb927.6.1740	Tb927.6.1740		hypothetical protein, conserved	55.402	7.1	0	13.147	1		3.35789	0.526067	0.0174806	1.75744	+	5.3	2	2	2.44117	2.23399	0.349081	54.413	3	5.3	2	2	2.7055	3.3894	0.530123	NaN	1	4.3	2	2	3.3	5.0003	0.698996	NaN	1
	2178	Tb927.8.7730	Tb927.8.7730		dihydroceramide synthase, putative	45.174	8.1	0	8.3619	1		3.25969	0.513177	0.0494192	1.3061	+	2.8	1	1	NaN	NaN		NaN	0	5.3	2	2	2.1965	2.7093	0.432857	1.5361	2	5.5	2	2	2.7317	3.9219	0.593497	13.238	2
	1901	Tb927.7.4170	Tb927.7.4170		fatty acid elongase, putative	30.493	14	0	27.74	1		3.08215	0.488853	5.92461e-05	4.22734	+	14	3	3	3.36033	3.09492	0.49065	12.812	4	8.9	2	2	2.4008	3.0121	0.478869	0.94082	2	8.9	2	2	2.1858	3.1408	0.49704	5.7687	3
	1902	Tb927.7.4180	Tb927.7.4180		fatty acid elongase, putative	33.87	21.6	0	63.904	1		3.06651	0.486644	0.00206416	2.68526	+	16.7	4	4	2.92483	2.70424	0.432045	9.8597	5	21.6	5	5	2.4531	3.0704	0.487195	21.648	8	14.8	3	3	2.2791	3.4729	0.540692	11.861	4
	1459	Tb927.4.2530	Tb927.4.2530		hypothetical protein, conserved	16.835	24.1	0	8.6308	1		3.05164	0.484534	0.000709749	3.1489	+	7	1	1	3.15996	2.86969	0.457835	NaN	1	13.3	2	2	2.3901	2.9941	0.476266	72.023	2	17.7	2	2	2.2955	3.3075	0.5195	16.309	2
	1505	Tb927.4.4350	Tb927.4.4350		hypothetical protein, conserved	23.321	36.9	0	37.227	1		2.98011	0.474232	0.000496024	3.3045	+	14.3	3	3	3.11876	2.86714	0.457448	11.953	4	32	5	5	2.5428	3.1919	0.504049	37.498	5	29.1	4	4	1.9632	2.892	0.461198	7.4854	3
	351	Tb927.10.12290	Tb927.10.12290		UDP-Gal or UDP-GlcNAc-dependent glycosyltransferase, putative	43.514	13.7	0	10.279	1		2.89979	0.462367	0.00124494	2.90485	+	5.4	2	2	3.51235	3.20688	0.506082	1.9083	2	8.4	3	3	2.1343	2.676	0.427486	26.088	3	10.8	4	4	1.9785	2.8414	0.453532	70.606	4
	1701	Tb927.6.2560	Tb927.6.2560		hypothetical protein, conserved	34.164	18.8	0	9.5859	1		2.87542	0.458701	0.0209247	1.67934	+	12.9	2	2	2.20003	2.00328	0.301743	13.899	2	16.2	2	2	2.1918	2.7461	0.438716	24.009	3	16.2	2	2	2.9665	4.3216	0.635645	152.67	3
	1972	Tb927.7.6960	Tb927.7.6960		ubiquitin-conjugating enzyme, putative,non-canonical ubiquiting-conjugating enzyme 1, putative	34.192	12.3	0	9.8112	1		2.86064	0.456464	0.00768721	2.11423	+	10	2	2	2.98811	2.78893	0.445438	59.443	2	2.3	1	1	2.3267	2.9342	0.46749	NaN	1	0	0	0	NaN	NaN		NaN	0
	685	Tb927.10.9370	Tb927.10.9370		hypothetical protein, conserved	39.97	11.3	0	34.235	1		2.85307	0.455313	0.0153637	1.8135	+	2.6	1	1	2.14293	1.96788	0.293999	NaN	1	7	2	2	2.6218	3.2609	0.513337	14.709	2	8.7	2	2	2.5662	3.6191	0.558601	NaN	1
	2440	Tb927.9.9720	Tb927.9.9720		hypothetical protein, conserved	25.447	24.9	0	30.955	1		2.82292	0.450698	0.0102631	1.98872	+	13.3	2	2	4.12439	3.78072	0.577574	20.464	2	16.9	3	3	2.072	2.6067	0.416091	12.789	3	16.9	3	3	1.6006	2.2826	0.35843	39.298	3
	1833	Tb927.7.220	Tb927.7.220	CDS	CDP-diacylglycerol synthetase, putative	46.349	12.3	0	10.616	1		2.70998	0.432966	0.00828873	2.08151	+	9.9	3	3	2.40321	2.19708	0.341845	14.345	2	6.9	2	2	2.057	2.6351	0.420797	23.535	2	4.4	1	1	2.3527	3.4376	0.536255	NaN	1
	1945	Tb927.7.5840	Tb927.7.5840		hypothetical protein, conserved	26.164	16.6	0	18.282	1		2.67328	0.427045	0.000363824	3.43911	+	16.6	4	4	3.06485	2.81825	0.44998	6.7115	3	16.6	4	4	2.1041	2.6157	0.417588	28.13	3	13.5	3	3	1.8015	2.5916	0.413568	5.2828	2
	916	Tb927.11.1680	Tb927.11.1680		vesicular-fusion protein SEC18, putative	97.907	10	0	19.055	1		2.64014	0.421627	0.00206301	2.6855	+	10	7	7	2.70153	2.44864	0.388925	32.044	7	3.6	3	3	2.0071	2.5142	0.4004	36.94	3	3.7	3	3	2.0555	2.9892	0.475555	5.0806	3
	893	Tb927.11.16110	Tb927.11.16110		integrin alpha chain protein, putative	78.001	8.7	0	9.6527	1		2.63917	0.421468	0.00149011	2.82678	+	3.7	2	2	3.22893	2.93324	0.467347	55.124	2	8.7	4	4	1.9836	2.48	0.394452	34.388	4	3.3	2	2	1.734	2.527	0.402605	4.227	2
	1916	Tb927.7.4760;Tb11.v5.0159	Tb927.7.4760;Tb11.v5.0159		hypothetical protein, conserved;hypothetical protein, conserved	58.815	20.2	0	67.573	2		2.6309	0.420105	0.016177	1.7911	+	17.3	5	5	3.61664	3.28213	0.516156	29.542	6	20	6	6	1.4769	1.8485	0.266819	42.869	7	15.4	5	5	2.0705	3.0015	0.477338	24.181	5
	921	Tb927.11.1690	Tb927.11.1690		hypothetical protein, conserved	20.428	10.4	0	41.9	1		2.62752	0.419546	0.00374988	2.42598	+	10.4	1	1	3.4082	3.10646	0.492265	NaN	1	10.4	1	1	1.9575	2.4516	0.38945	49.044	2	10.4	1	1	1.6563	2.3819	0.376924	NaN	1
	2097	Tb927.8.4890	Tb927.8.4890		endoplasmic reticulum oxidoreductin, putative,pol-associated gene 1	49.202	10.2	0	16.521	1		2.61518	0.417501	0.00316463	2.49968	+	8.4	3	3	2.47451	2.25439	0.353028	3.1831	3	10.2	4	4	2.1644	2.7213	0.434776	7.4803	4	7	3	3	2.016	2.9154	0.464698	1.5269	3
	1688	Tb927.6.2320;Tb927.6.2260	Tb927.6.2320;Tb927.6.2260		hypothetical protein, conserved;hypothetical protein, conserved	20.146	36.2	0	35.58	2		2.60378	0.415604	0.000387662	3.41155	+	27.7	4	4	2.75179	2.52353	0.402009	16.544	4	36.2	5	5	2.189	2.7456	0.438637	8.2226	5	27.7	4	4	1.7514	2.5478	0.406165	14.428	4
	864	Tb927.11.15230	Tb927.11.15230		cytosolic coat protein, putative	25.564	27.2	0	14.088	1		2.58452	0.41238	0.000652418	3.18547	+	12.7	3	3	2.62219	2.41511	0.382937	2.8536	3	18.4	4	4	2.1506	2.699	0.431203	3.923	4	21.5	4	4	1.815	2.6485	0.423	69.129	4
	1289	Tb927.3.1840	Tb927.3.1840		3-oxo-5-alpha-steroid 4-dehydrogenase, putative	33.355	29.9	0	202.99	1	1	2.58246	0.412033	1.46815e-05	4.83323	+	29.5	10	10	2.86517	2.60797	0.416303	9.9925	14	26.8	9	9	2.0584	2.5765	0.41103	6.9755	12	23.8	7	7	1.7802	2.5631	0.408766	5.8756	11
	2146	Tb927.8.650	Tb927.8.650		cation-transporting ATPase, putative	140.4	10.2	0	32.058	1		2.57851	0.411369	0.00446658	2.35002	+	6.1	7	7	2.38447	2.17448	0.337355	24.252	8	6.7	7	7	2.3523	2.9544	0.470469	45.606	6	6.5	8	8	1.8408	2.6686	0.426283	19.729	9
	2341	Tb927.9.3770	Tb927.9.3770		hypothetical protein, conserved	23.95	27.7	0	37.076	1		2.54722	0.406067	0.000637296	3.19566	+	22.3	3	3	2.87994	2.63061	0.420056	36.35	3	27.7	4	4	1.9472	2.3826	0.377051	74.912	5	17.7	2	2	1.8302	2.6369	0.421094	41.414	3
	1091	Tb927.11.6640	Tb927.11.6640	CYB5	cytochrome b5, putative (CYB5)	14.754	12.8	0	4.683	1		2.53471	0.403928	0.0014721	2.83206	+	12.8	1	1	2.97451	2.71172	0.433244	NaN	1	12.8	1	1	1.822	2.2958	0.360934	NaN	1	12.8	1	1	1.8001	2.6158	0.417605	NaN	1
	1211	Tb927.2.3370	Tb927.2.3370		UDP-Gal or UDP-GlcNAc-dependent glycosyltransferase, putative	43.687	23.1	0	34.525	1		2.52642	0.402506	0.00160617	2.79421	+	18	5	5	2.97212	2.66503	0.425702	21.496	5	10.9	3	3	2.1396	2.661	0.425045	21.317	2	17.5	5	5	1.5518	2.2739	0.356771	17.213	4
	1995	Tb927.7.900	Tb927.7.900		hypothetical protein, conserved	64.798	33.1	0	203.41	1		2.50261	0.398394	0.00284431	2.54602	+	29.4	12	12	2.42002	2.19887	0.342199	51.346	14	29.6	11	11	2.2102	2.7897	0.445558	9.648	12	29.6	10	10	1.7765	2.5552	0.407425	28.613	11
	1962	Tb927.7.6460	Tb927.7.6460		FG-GAP repeat protein, putative,intergrin alpha chain protein, putative	92.145	6.7	0	9.4249	1		2.49001	0.3962	0.000590466	3.22881	+	5.4	2	2	2.87828	2.61404	0.417312	49.058	2	5.4	2	2	1.8631	2.3481	0.370717	5.9275	2	6.7	3	3	1.7431	2.5152	0.400573	6.2084	3
	608	Tb927.10.6640	Tb927.10.6640		COP-coated vesicle membrane protein erv25 precursor, putative,ER--golgi transport protein erv25 precursor, putative	28.188	41.1	0	143.12	1		2.47902	0.39428	0.00223595	2.65054	+	41.1	9	9	2.56036	2.35383	0.371775	13.612	11	27.3	5	5	2.178	2.799	0.447003	19.286	7	28.5	5	5	1.5979	2.3124	0.364063	13.556	6
	1601	Tb927.5.3220	Tb927.5.3220		signal peptidase type I, putative	23.706	17.8	0	7.6684	1		2.44872	0.388939	0.00109222	2.96169	+	7.2	2	2	2.5052	2.3059	0.362841	22.259	2	13.9	3	3	2.1165	2.6545	0.423983	7.5234	3	11.1	2	2	1.6454	2.3988	0.379994	6.3178	2
	1008	Tb927.11.4200	Tb927.11.4200		lectin, putative,mannose-specific lectin, putative	62.272	10.5	0	16.262	1		2.43309	0.386158	0.00413578	2.38344	+	10.5	3	3	2.22262	2.07801	0.317647	7.773	3	6.6	2	2	2.1351	2.7256	0.435462	1.7681	2	10.5	3	3	1.7632	2.5431	0.405363	27.539	3
	234	Tb927.1.1140	Tb927.1.1140		hypothetical protein, conserved	40.006	8.1	0	18.119	1		2.41849	0.383545	0.0111755	1.95173	+	8.1	2	2	3.42325	3.13234	0.495869	34.482	2	5	1	1	1.5965	1.9959	0.300139	NaN	1	8.1	2	2	1.5594	2.2627	0.354627	12.897	2
	1180	Tb927.11.9820	Tb927.11.9820		hypothetical protein, conserved	64.425	11.8	0	17.043	1		2.41504	0.382924	0.00691262	2.16036	+	7.7	4	4	2.13516	1.96017	0.292294	20.284	4	10.1	4	4	2.0902	2.6375	0.421192	28.073	4	10.6	4	4	1.8862	2.7245	0.435287	27.428	4
	1619	Tb927.5.3710	Tb927.5.3710	TbnSMase	essential neutral sphingomyelinase (TbnSMase)	65.019	13.4	0	43.289	1		2.38933	0.378275	0.000820482	3.08593	+	10.9	4	4	2.47715	2.24341	0.350909	12.245	5	10.9	4	4	1.9243	2.3985	0.37994	11.62	5	10.7	4	4	1.7508	2.535	0.403978	12.672	4
	1112	Tb927.11.7510;Tb927.11.7460	Tb927.11.7510;Tb927.11.7460		glucose-regulated protein 78, putative,luminal binding protein 1 (BiP), putative;glucose-regulated protein 78, putative,luminal binding protein 1 (BiP), putative	71.434	66.6	0	323.31	2		2.38297	0.377119	0.000503761	3.29778	+	66.6	47	47	2.47127	2.2554	0.353224	10.917	85	65.1	44	44	1.9616	2.4409	0.38755	9.4023	75	62.5	38	38	1.7047	2.458	0.390582	7.3321	74
	1384	Tb927.3.5090	Tb927.3.5090	TXN2	tryparedoxin, putative	22.18	39.9	0	71.494	1		2.32489	0.366402	0.00685556	2.16396	+	39.9	6	6	2.10093	1.93491	0.286661	2.2456	5	39.9	6	6	2.1861	2.7274	0.435749	10.36	7	31.8	4	4	1.6567	2.3812	0.376796	11.957	5
	1572	Tb927.5.1930	Tb927.5.1930		hypothetical protein, conserved	24.188	28.8	0	46.301	1		2.30584	0.362828	0.0146408	1.83444	+	23.3	4	4	2.28686	2.0869	0.319501	4.8054	7	28.8	6	6	1.5134	1.9104	0.281124	65.67	7	12.6	2	2	2.1347	3.0751	0.487859	6.1736	4
	2199	Tb927.9.10010	Tb927.9.10010		chaperone protein DNAj, putative	56.711	18.6	0	35.543	1		2.29161	0.36014	0.00175057	2.75682	+	11.4	5	5	2.60681	2.3936	0.379052	18.248	6	16.3	7	7	1.6493	2.0773	0.317499	8.8361	8	10.6	6	6	1.6869	2.4203	0.383869	11.97	5
	1401	Tb927.3.680	Tb927.3.680		cytochrome P450, putative	66.122	18.7	0	24.197	1		2.24491	0.3512	0.00356576	2.44785	+	14.9	7	7	2.57772	2.36027	0.372962	18.362	8	12.8	5	5	1.9702	2.4457	0.388403	20.31	4	13	5	5	1.3778	1.9599	0.292234	45.516	6
	1645	Tb927.5.860	Tb927.5.860	SelT	selenoprotein, putative (SelT)	28.792	10	0.0027211	2.6568	1		2.22576	0.347478	0.0146899	1.83298	+	3.1	1	1	1.8639	1.69863	0.230099	NaN	1	6.9	1	1	1.8872	2.3875	0.377943	NaN	1	3.1	1	1	1.873	2.7189	0.434393	NaN	1
	1312	Tb927.3.2420	Tb927.3.2420		hypothetical protein, conserved	14.261	18.3	0	4.1809	1		2.08799	0.319728	0.000174942	3.75711	+	18.3	2	2	2.35388	2.13024	0.328429	4.9541	2	18.3	2	2	1.604	2.0336	0.308266	25.597	2	10.3	1	1	1.429	2.1013	0.322488	NaN	1
	309	Tb927.10.10610	Tb927.10.10610		protein tyrosine phosphatase, putative	25.449	10.9	0	28.418	1	1	2.08327	0.318745	0.000308565	3.51065	+	10.9	2	2	2.27832	2.10058	0.322338	6.8631	2	10.9	2	2	1.5983	2.0118	0.303585	10.889	2	10.9	2	2	1.4829	2.1395	0.330312	3.9006	2
	2315	Tb927.9.2450	Tb927.9.2450		electon transport protein SCO1/SCO2, putative	44.135	31.9	0	156.35	1	1	2.07456	0.316927	0.00187402	2.72723	+	30.3	10	10	2.08973	1.90356	0.279568	28.901	11	31.9	10	10	1.7613	2.2133	0.34504	19.599	11	31.9	9	9	1.4539	2.1192	0.326172	13.984	10
	606	Tb927.10.6610	Tb927.10.6610		chaperone protein DNAj, putative	31.198	32.1	0	87.604	1		2.03376	0.308299	0.0023553	2.62795	+	24.8	5	5	2.04926	1.86947	0.271719	5.5666	5	16.1	3	3	1.7621	2.2145	0.345276	8.2974	3	28.5	5	5	1.4132	2.0319	0.307902	18.489	5
	1529	Tb927.4.730	Tb927.4.730		hypothetical protein, conserved	55.016	6.7	0	37.862	1		2.02208	0.305798	0.00183396	2.73661	+	4.3	1	1	2.32169	2.16357	0.33517	16.148	2	6.7	2	2	1.4988	1.8682	0.271423	9.9933	2	6.7	2	2	1.3956	2.0455	0.310799	10.362	3
	158	Tb927.10.5080;Tb11.v5.0339	Tb927.10.5080;Tb11.v5.0339	TTA2	GPI transamidase component Tta2 (TTA2);hypothetical protein, conserved	45.619	3.9	0	9.9283	2		6.36843	0.804032	8.77427e-05	4.05679	+	3.9	1	1	6.78472	6.27746	0.797784	5.0316	2	3.9	1	1	5.3099	6.6803	0.824796	0.40374	2	3.9	1	1	4.2519	6.1591	0.789517	5.1389	2
	2405	Tb927.9.7800	Tb927.9.7800		hypothetical protein, conserved	29.096	3.8	0.00097087	3.7498	1		3.632	0.560145	0.000396103	3.40219	+	3.8	1	1	3.76279	3.43796	0.536301	NaN	1	3.8	1	1	2.8596	3.5824	0.554174	NaN	1	3.8	1	1	2.6915	3.8901	0.589961	NaN	1
	1369	Tb927.3.4630	Tb927.3.4630		UDP-glucose:glycoprotein glucosyltransferase, putative	186.84	3.6	0	32.121	1		2.20196	0.342808	0.044185	1.35473	+	1.1	2	2	1.44783	1.33163	0.124383	NaN	1	1.7	2	2	2.2076	2.7861	0.444997	8.7601	2	2.4	3	3	1.9751	2.8777	0.459046	26.255	3
	1189	Tb927.2.1760	Tb927.2.1760		hypothetical protein, conserved	89.133	2.9	0	4.3205	1		4.25852	0.629259	0.0194427	1.71124	+	0	0	0	NaN	NaN		NaN	0	1	1	1	3.7726	4.6531	0.667742	NaN	1	1.9	1	1	2.7014	3.8974	0.590775	NaN	1
	1657	Tb927.6.1140	Tb927.6.1140		dolichyl-P-Man:GDP-Man5GlcNAc2-PP-dolichyl alpha-1,2-mannosyltransferase, putative	75.202	2.4	0.0052016	2.2471	1		2.5802	0.411653	0.0275197	1.56036	+	2.4	1	1	3.03905	2.80112	0.447332	NaN	1	2.4	1	1	1.8859	2.3767	0.375974	NaN	1	0	0	0	NaN	NaN		NaN	0
	185	Tb11.v5.0555;Tb927.10.5390	Tb11.v5.0555;Tb927.10.5390		hypothetical protein, conserved;hypothetical protein, conserved	126.38	2.3	0	5.8248	2		4.02682	0.604963	0.00102315	2.99006	+	2.3	2	2	4.19164	3.9285	0.594227	30.947	3	1.2	1	1	2.9873	3.6625	0.563778	NaN	1	1.1	1	1	3.1148	4.5382	0.656884	NaN	1
	1883	Tb927.7.3760	Tb927.7.3760		phosphatidylserine synthase, putative	57.595	2.2	0.0067941	2.0995	1		2.51824	0.401097	0.0223964	1.64982	+	2.2	1	1	2.57785	2.35955	0.372829	NaN	1	0	0	0	NaN	NaN		NaN	0	2.2	1	1	1.9021	2.6876	0.429365	NaN	1
	942	Tb927.11.2210	Tb927.11.2210		diacylglycerol acyltransferase, putative	167.24	0.9	0	8.5924	1		2.33919	0.369065	0.00108298	2.96538	+	0.9	1	1	2.70959	2.5096	0.399604	NaN	1	0.9	1	1	1.7288	2.1881	0.340067	NaN	1	0.9	1	1	1.5971	2.3309	0.367524	NaN	1
	2434	Tb927.9.9550	Tb927.9.9550		hypothetical protein, conserved	24.509	23.1	0	22.997	1		1.97853	0.296344	0.0105975	1.9748	+	22.6	4	4	1.76663	1.63348	0.213114	53.396	4	10.4	2	2	1.6383	2.0609	0.314057	9.1494	2	5.2	2	2	1.5623	2.3007	0.36186	24.538	2
	925	Tb927.11.17040;Tb927.10.16190;Tb927.10.16000;Tb927.11.18690	Tb927.11.17040;Tb927.10.16190		expression site-associated gene (ESAG) protein, putative,expression site-associated gene 4 (ESAG4) protein, putative,receptor-type adenylate cyclase, putative;expression site-associated gene 4 (ESAG4) protein, putative,expression site-associated gene (ESA	137.49	6	0	13.37	4		1.9717	0.29484	0.00634132	2.19782	+	5.1	4	3	1.95561	1.7745	0.249075	16.605	3	4.9	4	3	1.5081	1.8849	0.275288	59.106	3	3.1	2	2	1.5874	2.2917	0.360158	25.83	2
	1525	Tb927.4.590	Tb927.4.590		hypothetical protein, conserved	88.024	30.9	0	102.56	1		1.94723	0.289416	0.00280695	2.55176	+	26.9	16	16	1.93382	1.77013	0.248005	11.693	16	25.3	13	13	1.5836	1.9881	0.298438	12.723	13	24.3	12	12	1.4576	2.098	0.321805	13.261	13
	1464	Tb927.4.2770	Tb927.4.2770		hypothetical protein, conserved	36.723	10.9	0	6.3818	1		1.9449	0.288898	0.0163198	1.78729	+	5	1	1	1.70305	1.5637	0.194153	NaN	1	3.8	1	1	1.9195	2.3954	0.379378	NaN	1	2.1	1	1	1.3695	1.9641	0.293164	NaN	1
	775	Tb927.11.12220	Tb927.11.12220		catalytic subunit of the vacuolar transporter chaperone 4	91.361	6.6	0	7.5541	1		1.92554	0.284553	0.0369091	1.43287	+	5.5	3	3	1.98847	1.8135	0.258518	23.63	3	2.6	2	2	1.1474	1.4371	0.157487	44.569	2	4	2	2	1.8767	2.7394	0.437655	16.769	2
	1400	Tb927.3.640	Tb927.3.640		hypothetical protein, conserved	32.723	18.2	0	7.4328	1		1.91359	0.281849	0.00389771	2.40919	+	14.2	3	3	1.91245	1.7116	0.233401	63.134	3	4.1	1	1	1.6424	2.0749	0.316997	NaN	1	8.1	2	2	1.3721	1.9731	0.295149	3.5319	2
	1545	Tb927.5.1210	Tb927.5.1210		short-chain dehydrogenase, putative	33.876	58.2	0	144.69	1		1.89704	0.278078	0.00112545	2.94868	+	52.7	14	14	2.09864	1.92857	0.285235	7.1089	17	48.6	13	13	1.4358	1.7884	0.252465	4.3915	15	43.4	11	11	1.3437	1.9794	0.296534	8.1809	13
	420	Tb927.10.14440;Tb927.11.7650;Tb11.0350	Tb927.10.14440	b9d1	hypothetical protein, conserved	31.836	7	0	4.7916	3		1.89259	0.277057	0.000803024	3.09527	+	2.8	1	1	2.16746	1.96908	0.294264	NaN	1	7	2	2	1.4915	1.9083	0.280647	11.607	2	4.2	2	2	1.2075	1.8041	0.256261	NaN	1
	1806	Tb927.7.1290	Tb927.7.1290		hypothetical protein, conserved	26.998	25.6	0	111.85	1		1.87172	0.27224	0.00124878	2.90352	+	25.6	3	3	1.91004	1.76053	0.245644	11.153	4	25.6	3	3	1.4634	1.907	0.280351	10.302	4	21.1	2	2	1.3118	1.9531	0.290724	18.049	2
	1223	Tb927.2.4090	Tb927.2.4090		hypothetical protein, conserved	29.38	28.1	0	55.495	1		1.8074	0.257054	0.002872	2.54181	+	23.7	4	4	1.8205	1.65942	0.219956	12.566	4	24.8	4	4	1.4605	1.84	0.264818	9.4275	5	24.8	4	4	1.3254	1.9337	0.286389	4.2364	5
	1452	Tb927.4.2320	Tb927.4.2320		hypothetical protein, conserved	15.722	11.1	0	21.37	1		1.78959	0.252752	0.0257073	1.58994	+	11.1	1	1	1.85898	1.70724	0.232295	3.9836	3	11.1	1	1	1.4948	1.8759	0.27321	3.4262	3	0	0	0	NaN	NaN		NaN	0
	806	Tb927.11.13290	Tb927.11.13290	TbTim17	mitochondrial import inner membrane translocase subunit tim17 (Tim17)	16.296	9.9	0	14.456	1	1	1.78888	0.252582	0.00247973	2.6056	+	9.9	1	1	1.95599	1.77904	0.250186	NaN	1	9.9	1	1	1.3235	1.6708	0.222924	NaN	1	9.9	1	1	1.338	1.9259	0.284634	NaN	1
	2013	Tb927.8.1570	Tb927.8.1570		hypothetical protein, conserved	28.825	36.4	0	98.245	1		1.76705	0.247249	0.00223525	2.65067	+	31.6	6	6	1.81084	1.65961	0.220007	7.533	6	30.9	6	6	1.5091	1.8935	0.277265	17.094	7	31.6	6	6	1.2184	1.7558	0.244475	3.3222	7
	975	Tb927.11.3270	Tb927.11.3270		squalene monooxygenase, putative	63.81	7.4	0	13.821	1		1.74992	0.243019	0.000132747	3.87698	+	5.4	2	2	1.96236	1.76551	0.246869	4.1394	2	7.4	3	3	1.3544	1.7183	0.235099	6.1774	2	5.4	2	2	1.2113	1.7664	0.247089	0.30174	2
	561	Tb927.10.4760	Tb927.10.4760		hypothetical protein, conserved	27.159	13.2	0	10.007	1		1.73828	0.24012	0.0152776	1.81594	+	13.2	4	4	1.68339	1.4705	0.167466	18.453	4	3.3	1	1	1.3661	1.7247	0.236714	NaN	1	9.1	3	3	1.4328	2.071	0.31618	19.617	3
	290	Tb927.1.860	Tb927.1.860		hypothetical protein, conserved	29.562	35.4	0	197.28	1		1.72277	0.236227	0.00470997	2.32698	+	35.4	5	5	1.74596	1.58474	0.199957	7.441	6	35.4	5	5	1.3471	1.6967	0.229605	8.465	6	26.9	3	3	1.3163	1.9016	0.279119	7.6246	3
	2042	Tb927.8.2570	Tb927.8.2570		hypothetical protein, conserved	48.529	7.2	0.0047993	2.3197	1		1.72275	0.236222	0.0140733	1.8516	+	4.6	1	1	2.23934	2.00537	0.302195	NaN	1	7.2	2	2	1.4015	1.7535	0.243906	NaN	1	4.6	1	1	1.0028	1.454	0.162564	NaN	1
	450	Tb927.10.15500	Tb927.10.15500		SNARE protein, putative	26.528	7.6	0.0035477	2.4712	1		1.70575	0.231916	0.0100167	1.99927	+	7.6	1	1	2.03426	1.90462	0.279808	NaN	1	7.6	1	1	1.4406	1.7706	0.24812	NaN	1	7.6	1	1	1.0065	1.4717	0.167819	NaN	1
	1760	Tb927.6.4500	Tb927.6.4500		hypothetical protein, conserved	22.705	36.9	0	88.444	1		1.69305	0.228671	0.00663481	2.17817	+	36.9	6	6	1.62602	1.49938	0.175913	12.328	7	27.6	4	4	1.4109	1.7743	0.249027	7.4707	4	24.1	3	3	1.259	1.8242	0.261072	2.2014	2
	1913	Tb927.7.4470	Tb927.7.4470		hypothetical protein, conserved	22.398	5.2	0.00048996	3.8587	1		1.69243	0.228511	0.0047649	2.32195	+	5.2	1	1	1.65085	1.52697	0.183832	NaN	1	5.2	1	1	1.4388	1.7989	0.255007	NaN	1	5.2	1	1	1.2252	1.7648	0.246695	NaN	1
	836	Tb927.11.14170	Tb927.11.14170		hypothetical protein, conserved	67.163	25.1	0	51.993	1		1.68689	0.227087	0.00687652	2.16263	+	11.3	6	6	1.65788	1.49542	0.174762	11.176	7	19.1	10	10	1.36	1.7472	0.242343	35.823	11	19.1	10	10	1.2497	1.8372	0.264156	9.3223	9
	2017	Tb927.8.1740	Tb927.8.1740	TbTim62	hypothetical protein, conserved	62.143	30	0	123.65	1	1	1.64632	0.216515	0.00149865	2.8243	+	24.7	10	10	1.74076	1.58919	0.201177	8.252	12	30	11	11	1.28	1.6161	0.208468	11.612	13	22.3	7	7	1.1914	1.7374	0.2399	10.971	8
	2225	Tb927.9.11220	Tb927.9.11220	TbTim42	hypothetical protein, conserved	41.551	45.5	0	129.71	1	1	1.64345	0.215756	0.000594246	3.22603	+	45.2	13	13	1.86428	1.6948	0.229118	13.178	13	39.3	11	11	1.268	1.5973	0.203386	13.785	12	28.4	8	8	1.1408	1.6397	0.214764	11.514	10
	1957	Tb927.7.6260	Tb927.7.6260		hypothetical protein, conserved	36.454	38.2	0	146.07	1		1.62066	0.209693	0.00125726	2.90058	+	30.1	8	8	1.71145	1.56196	0.193671	8.479	11	33.5	8	8	1.2903	1.6064	0.205854	5.1521	12	21.7	5	5	1.1765	1.6965	0.229554	12.742	7
	804	Tb927.11.13230	Tb927.11.13230		hypothetical protein, conserved	23.909	50	0	97.883	1		1.61037	0.206925	0.00404257	2.39334	+	45.4	7	7	1.67555	1.53941	0.187354	17.116	7	40.3	8	8	1.2319	1.5455	0.189069	18.153	8	33.3	5	5	1.2024	1.7553	0.244351	6.4983	6
	1832	Tb927.7.2190	Tb927.7.2190		hypothetical protein, conserved	29.242	18.4	0	47.263	1		1.60932	0.206642	0.00570587	2.24368	+	18.4	5	5	1.62022	1.45264	0.162159	5.1878	6	16.2	4	4	1.3451	1.6869	0.227089	4.8799	5	16.2	4	4	1.1815	1.7009	0.230679	3.4035	5
	350	Tb927.10.12240	Tb927.10.12240		short-chain dehydrogenase, putative	36.075	28.4	0	59.478	1		1.60359	0.205092	0.0220171	1.65724	+	20.8	4	4	1.42414	1.31024	0.11735	22.867	6	20.8	4	4	1.4608	1.8285	0.262095	16.478	4	25.4	4	4	1.1944	1.7212	0.235831	7.7368	6
	1807	Tb927.7.1300	Tb927.7.1300		protein disulfide isomerase, putative	41.939	35	0	65.918	1		1.58652	0.200445	0.000876856	3.05707	+	34.5	13	13	1.71433	1.54055	0.187675	22.12	13	29.4	11	11	1.2508	1.5753	0.197363	12.001	11	23.1	10	10	1.119	1.6455	0.216298	11.163	10
	937	Tb927.11.2010	Tb927.11.2010		hypothetical protein, conserved	50.298	6.7	0	13.07	1	1	1.57072	0.196099	0.000361626	3.44174	+	6.7	2	2	1.77999	1.60655	0.205896	46.307	2	4.6	1	1	1.272	1.5653	0.194598	NaN	1	4.6	1	1	1.0593	1.541	0.187803	NaN	1
	1127	Tb927.11.8380	Tb927.11.8380	CPR	NADPH--cytochrome p450 reductase, putative (CPR)	70.946	14.5	0	25.483	1		1.55566	0.191914	0.0138349	1.85902	+	11.3	6	2	1.75153	1.61397	0.207896	9.9999	2	12.8	7	2	1.3905	1.7325	0.238673	20.032	2	9.6	5	1	0.94225	1.3464	0.129174	NaN	1
	787	Tb927.11.12590	Tb927.11.12590		hypothetical protein, conserved	27.968	15	0	5.4545	1		1.51892	0.181534	0.00679717	2.16767	+	9.5	2	2	1.51368	1.37834	0.139357	25.229	2	5.5	1	1	1.2566	1.5721	0.19648	NaN	1	15	3	3	1.1081	1.6172	0.208764	10.127	3
	466	Tb927.10.1860	Tb927.10.1860		hypothetical protein, conserved	39.134	15.6	0	12.132	1		1.5179	0.181244	0.0407104	1.39029	+	11.1	3	3	1.29162	1.1962	0.0778042	36.369	3	8.1	2	2	1.4696	1.8454	0.266091	99.722	2	12.5	3	3	1.1	1.5843	0.199837	38.753	3
	528	Tb927.10.3640	Tb927.10.3640		hypothetical protein, conserved	31.534	12.3	0	8.9221	1		1.5111	0.179295	0.000162547	3.78902	+	12.3	3	3	1.66845	1.51787	0.181233	20.017	3	12.3	3	3	1.2155	1.5264	0.183668	2.9711	3	12.3	3	3	1.0217	1.4893	0.172982	13.809	3
	1209	Tb927.2.3080	Tb927.2.3080		fatty acid desaturase, putative,oleate desaturase, putative	47.078	15.4	0	28.748	1		1.50407	0.177267	0.00668557	2.17486	+	12.3	4	4	1.56497	1.39634	0.14499	4.7183	4	15.4	5	5	1.1733	1.4823	0.170936	2.9201	5	8.6	3	3	1.1162	1.6439	0.215875	5.4236	3
	1642	Tb927.5.740	Tb927.5.740		hypothetical protein, conserved	23.911	7.7	0	14.722	1	1	1.49095	0.173464	0.0429349	1.36719	+	7.7	1	1	1.54424	1.41229	0.149924	NaN	1	7.7	1	1	1.2842	1.574	0.197005	NaN	1	0	0	0	NaN	NaN		NaN	0
	2007	Tb927.8.1420	Tb927.8.1420	ACAD	acyl-CoA dehydrogenase, mitochondrial precursor, putative	55.982	32.2	0	86.752	1	1	1.48223	0.170915	0.0177881	1.74987	+	25	9	9	1.42462	1.2747	0.105407	35.666	12	27.2	10	10	1.2472	1.567	0.195069	17.544	11	25.4	9	9	1.2101	1.6303	0.212268	19.586	13
	1040	Tb927.11.5220	Tb927.11.5220		chaperone protein DNAj, putative	84.81	32	0	113.04	1		1.46531	0.16593	0.00820964	2.08568	+	20.2	11	11	1.5588	1.41171	0.149746	10.958	15	19.3	10	10	1.2901	1.6165	0.208576	50.667	13	23.8	11	11	0.94703	1.3787	0.13947	18.072	12
	1725	Tb927.6.3680	Tb927.6.3680		hypothetical protein, conserved	27.875	12.2	0	8.3959	1	1	1.46184	0.164898	0.011835	1.92683	+	12.2	3	3	1.69128	1.52276	0.182633	5.1888	3	12.2	3	3	1.036	1.3002	0.11401	5.3189	3	4.9	1	1	1.0776	1.5778	0.198052	NaN	1
	863	Tb927.11.15150	Tb927.11.15150		1-acyl-sn-glycerol-3-phosphate acyltransferase, putative	30.359	23.6	0	61.923	1		1.44248	0.15911	0.00127878	2.8932	+	16.2	3	3	1.51474	1.39313	0.14399	26.661	4	16.2	3	3	1.2362	1.4843	0.171522	16.986	3	20.3	3	3	1.0053	1.4515	0.161817	28.772	3
	2037	Tb927.8.2460	Tb927.8.2460		hypothetical protein, conserved	30.901	19.7	0	110.77	1		1.43971	0.158275	0.000292175	3.53436	+	19.7	4	4	1.57329	1.43817	0.157809	3.6279	6	19.7	4	4	1.1327	1.4187	0.151891	10.782	5	19.7	4	4	1.0131	1.4626	0.165126	11.378	5
	1234	Tb927.2.450	Tb927.2.450		retrotransposon hot spot protein 4 (RHS4), putative	97.997	17.6	0	35.831	1		1.43737	0.157568	0.00400828	2.39704	+	16.7	12	1	1.58776	1.43441	0.156674	NaN	1	12.7	9	1	1.0893	1.3597	0.133443	NaN	1	8.9	7	1	1.0579	1.5226	0.182586	NaN	1
	2436	Tb927.9.9630	Tb927.9.9630		hypothetical protein, conserved	38.92	32.4	0	47.157	1		1.43089	0.155607	0.0252123	1.59839	+	25.9	7	7	1.35292	1.21862	0.0858687	18.452	6	30.4	7	7	1.1986	1.4887	0.172807	16.475	7	22	4	4	1.1248	1.6149	0.208146	64.964	3
	654	Tb927.10.8080	Tb927.10.8080		hypothetical protein, conserved	82.38	24.3	0	101.08	1		1.42674	0.154346	0.00972774	2.01199	+	15.8	10	10	1.42341	1.29029	0.110687	19.176	10	17.4	10	10	1.1915	1.4948	0.174583	25.236	9	11.8	7	7	1.0422	1.5058	0.177767	25.676	8
	1607	Tb927.5.3400	Tb927.5.3400		calcium-translocating P-type ATPase,calcium pump	110.32	20.7	0	105.81	1		1.41774	0.151597	0.00215506	2.66654	+	14.9	15	15	1.48606	1.36077	0.133783	7.0376	17	12.8	13	13	1.1267	1.4213	0.152686	11.328	14	12.3	9	9	1.0062	1.4734	0.168321	14.798	9
	585	Tb927.10.5770	Tb927.10.5770	VCP	valosin-containing protein homolog,Transitional endoplasmic reticulum ATPase, putative (VCP)	85.825	23.1	0	115.96	1		1.40691	0.148265	0.0293264	1.53274	+	18.5	10	10	1.33209	1.22419	0.0878471	7.5025	13	18.2	8	8	1.2883	1.6489	0.217194	16.588	11	20	9	9	0.95763	1.3796	0.139753	11.494	13
	199	Tb927.10.8230;Tb11.v5.0668	Tb927.10.8230;Tb11.v5.0668		protein disulfide isomerase,bloodstream- specific protein 2 precursor;protein disulfide isomerase	55.579	27.4	0	89.064	2		1.40614	0.148029	0.00790958	2.10185	+	24.7	12	12	1.44573	1.31603	0.119266	21.838	11	22.5	9	9	1.2231	1.5258	0.183498	32.168	8	21.7	9	9	0.96236	1.3846	0.141324	23.196	8
	1391	Tb927.3.5370	Tb927.3.5370		hypothetical protein, conserved	34.254	14.7	0	39.726	1		1.39459	0.144445	0.0132911	1.87644	+	14.7	3	3	1.60393	1.43959	0.15824	2.7885	4	14.7	3	3	1.2079	1.5046	0.177421	22.598	3	5.8	1	1	0.85061	1.2522	0.0976737	NaN	1
	992	Tb927.11.3750	Tb927.11.3750	B5R	NADH-cytochrome b5 reductase, putative (B5R)	34.091	7.2	0	6.9245	1		1.39431	0.144358	0.00189483	2.72243	+	4.9	1	1	1.55171	1.41387	0.150409	2.6564	2	7.2	2	2	1.0667	1.3391	0.126813	0.05207	2	2.3	1	1	0.99046	1.4317	0.155852	NaN	1
	1256	Tb927.2.5970	Tb927.2.5970		hypothetical protein, conserved	46.698	7.4	0	5.278	1		1.39354	0.144119	0.04968	1.30382	+	7.4	3	3	1.81041	1.64276	0.215575	20.927	3	4	2	2	0.89609	1.1217	0.0498767	9.2788	2	2.1	1	1	1.0318	1.4686	0.166904	NaN	1
	520	Tb927.10.3330	Tb927.10.3330		hypothetical protein, conserved	40.092	11.5	0	14.05	1		1.39229	0.14373	0.00597386	2.22375	+	8.3	2	2	1.47602	1.31858	0.120107	12.882	2	4.3	1	1	1.0553	1.3716	0.137227	NaN	1	11.5	3	3	1.0135	1.4923	0.173856	21.571	3
	1517	Tb927.8.7410;Tb927.4.5010	Tb927.8.7410;Tb927.4.5010		calreticulin, putative;calreticulin, putative	45.021	34.2	0	75.234	2		1.38994	0.142996	0.00837767	2.07688	+	29.9	13	13	1.43478	1.29331	0.111703	20.089	16	20.8	9	9	1.0914	1.3828	0.140759	15.118	11	24.6	8	8	1.044	1.5015	0.176525	12.529	10
	803	Tb927.11.13220	Tb927.11.13220		phospholipid:diacylglycerol acyltransferase-like protein	71.403	8.1	0	19.903	1		1.38518	0.141506	0.00854553	2.06826	+	6.4	4	4	1.64066	1.48524	0.171798	21.949	4	5	3	3	1.0136	1.2801	0.107244	18.199	3	5.2	2	2	0.95869	1.3979	0.145476	53.677	2
	1119	Tb927.11.8060	Tb927.11.8060		hypothetical protein, conserved	63.596	13.4	0	95.538	1		1.38126	0.140275	0.00985536	2.00633	+	9.1	4	4	1.39523	1.27395	0.105152	7.5567	5	8.6	3	3	1.0977	1.3845	0.141293	20.342	3	7	3	3	1.0335	1.4941	0.17438	10.257	3
	2224	Tb927.9.11150	Tb927.9.11150		hypothetical protein, conserved	91.905	17.5	0	54.138	1		1.37183	0.137299	0.0157849	1.80176	+	15.7	10	10	1.385	1.225	0.0881343	36.49	11	17.5	12	12	1.1425	1.4259	0.154089	38.875	13	13.6	9	9	1.0138	1.478	0.169674	7.8762	8
	543	Tb927.10.4050;Tb11.v5.0649	Tb927.10.4050;Tb11.v5.0649		serine palmitoyltransferase, putative;serine palmitoyltransferase, putative	61.392	6.1	0	6.9173	2		1.36991	0.136693	0.00543848	2.26452	+	2.5	1	1	1.45737	1.36257	0.134357	NaN	1	0	0	0	NaN	NaN		NaN	0	3.6	1	1	0.95451	1.3773	0.139029	NaN	1
	1439	Tb927.4.1970	Tb927.4.1970		hypothetical protein, conserved	62.008	10.9	0	9.7777	1		1.36806	0.136106	0.0170456	1.76839	+	6.4	3	3	1.33028	1.21581	0.0848643	2.5105	3	5.9	3	3	1.1717	1.434	0.156549	19.073	3	5	3	3	0.97859	1.4686	0.166904	16.207	3
	2279	Tb927.9.14070	Tb927.9.14070		short-chain dehydrogenase, putative	51.103	7.3	0	21.017	1		1.36236	0.134291	0.0214922	1.66772	+	5.2	1	1	1.58705	1.46925	0.167095	39.928	2	5.2	1	1	0.95368	1.1938	0.0769316	NaN	1	7.3	2	2	0.98905	1.4416	0.158845	20.569	3
	1948	Tb927.7.590	Tb927.7.590		hypothetical protein, conserved	51.692	6.5	0	4.0403	1	1	1.35875	0.13314	0.000343877	3.4636	+	0	0	0	NaN	NaN		NaN	0	4.3	1	1	1.0776	1.3592	0.133283	NaN	1	6.5	2	2	0.93295	1.3583	0.132996	3.0007	2
	1976	Tb927.7.710	Tb927.7.710	HSP70	heat shock 70 kDa protein, putative (HSP70)	70.211	41.2	0	242.17	1		1.34031	0.127205	0.00324945	2.48819	+	38	20	17	1.52833	1.3996	0.146004	11.003	20	39.1	20	18	1.0305	1.2897	0.110489	14.63	19	30.7	16	13	0.9296	1.3339	0.125123	17.631	14
	231	Tb927.10.14740;Tb927.10.14620;Tb11.v5.1063	Tb927.10.14740;Tb927.10.14620;Tb11.v5.1063		hypothetical protein, conserved;hypothetical protein, conserved;hypothetical protein, conserved	44.177	23.9	0	31.234	3		1.32521	0.122286	0.0295611	1.52928	+	19.7	4	4	1.40697	1.27953	0.107049	13.585	4	19.2	4	4	0.95389	1.1957	0.0776222	13.692	4	11.7	2	2	1.045	1.5212	0.182186	16.738	2
	188	Tb927.10.7100;Tb11.v5.0580	Tb927.10.7100;Tb11.v5.0580		delta-4 fatty acid desaturase;delta-6 fatty acid desaturase, putative	47.965	11.9	0	23.991	2		1.32429	0.121982	0.00955573	2.01974	+	2.1	1	1	1.54971	1.42617	0.15417	NaN	1	7.4	3	3	1.0357	1.306	0.115943	9.8256	2	9.7	3	3	0.85904	1.2469	0.0958316	17.901	4
	1970	Tb927.7.6920	Tb927.7.6920		hypothetical protein, conserved	70.056	13.9	0	62.795	1		1.31721	0.119655	0.0387838	1.41135	+	13.9	6	6	1.42704	1.29488	0.112231	15.257	7	10.7	4	4	0.92124	1.1544	0.0623563	11.325	5	5	1	1	1.0558	1.5289	0.184379	NaN	1
	422	Tb927.10.14510	Tb927.10.14510		hypothetical protein, conserved	95.105	10.8	0	58.337	1		1.31626	0.119343	0.0423053	1.37361	+	6.6	4	4	1.41693	1.24656	0.0957118	28.959	4	0.9	1	1	1.247	1.5563	0.192093	NaN	1	7.6	3	3	0.79823	1.1755	0.0702226	13.855	3
	396	Tb927.10.13630	Tb927.10.13630		glucosidase, putative	91.488	8.2	0	23.186	1		1.30093	0.114253	0.00824592	2.08376	+	6.8	4	4	1.36351	1.22544	0.0882938	22.384	4	6.8	4	4	1.0356	1.3023	0.114711	22.579	4	7.1	4	4	0.96569	1.3796	0.139753	14.48	4
	1259	Tb927.3.1020	Tb927.3.1020		hypothetical protein, conserved	54.34	12.6	0	26.301	1		1.30065	0.114161	0.0348645	1.45762	+	9.9	4	4	1.35122	1.22474	0.0880439	12.006	4	8.1	3	3	0.95287	1.1938	0.0769316	33.7	3	2.6	1	1	1.0326	1.5049	0.177508	NaN	1
	1924	Tb927.7.5230	Tb927.7.5230		lanosterol synthase	103.03	9.4	0	25.504	1		1.29425	0.112018	0.00966857	2.01464	+	6.3	5	5	1.34749	1.22924	0.089637	8.5837	5	7	4	4	1.0115	1.2702	0.103872	14.019	4	6	3	3	0.9417	1.3885	0.142546	24.336	4
	721	Tb927.11.10340	Tb927.11.10340	pgam5	phosphoglycerate mutase family member 5, putative	33.783	7.2	0	7.0864	1	1	1.28418	0.108627	0.0304117	1.51696	+	7.2	2	2	1.58095	1.45218	0.16202	67.019	2	3.6	1	1	0.93362	1.1663	0.0668103	NaN	1	3.6	1	1	0.87157	1.2504	0.097049	NaN	1
	1078	Tb927.11.6230	Tb927.11.6230	Sec61alpha	pretranslocation protein, alpha subunit, putative,SEC61-like (pretranslocation process) protein, putative	53.647	10.6	0	34.674	1		1.2801	0.107244	0.000216741	3.66406	+	3.3	1	1	1.39237	1.28181	0.107822	9.2841	2	5	2	2	1.0506	1.2906	0.110792	NaN	1	8.3	3	3	0.87702	1.268	0.103119	5.5117	5
	1934	Tb927.7.5520	Tb927.7.5520		hypothetical protein, conserved	22.366	13.6	0	14.132	1		1.27832	0.106641	0.0247332	1.60672	+	13.6	2	2	1.25818	1.1485	0.0601314	2.8473	2	13.6	2	2	1.1245	1.3932	0.144013	9.7231	2	7.3	1	1	0.9082	1.3055	0.115777	NaN	1
	410	Tb927.10.14090	Tb927.10.14090		transporter, putative	56.529	10.3	0	6.5776	1		1.2762	0.105919	0.0115571	1.93715	+	7.2	2	2	1.44103	1.3089	0.116906	10.839	2	5.5	1	1	0.9436	1.1849	0.0736817	NaN	1	8.6	2	2	0.92103	1.3402	0.12717	NaN	1
	1710	Tb927.6.2930	Tb927.6.2930		hypothetical protein, conserved	59.606	7.6	0	14.168	1		1.27214	0.104534	0.0390603	1.40826	+	7.6	3	3	1.61561	1.45917	0.164106	60.726	2	5.1	2	2	0.91928	1.1467	0.0594498	4.9229	2	5.1	2	2	0.84951	1.2304	0.0900463	11.096	2
	1562	Tb927.5.1760	Tb927.5.1760		hypothetical protein, conserved	72.635	19.5	0	100.21	1		1.26905	0.10348	0.0122744	1.911	+	14.8	7	7	1.40687	1.26788	0.103077	15.981	8	16.3	7	7	0.95001	1.1887	0.0750723	16.382	7	10.7	5	5	0.93032	1.3561	0.132292	15.16	5
	1018	Tb927.11.4540	Tb927.11.4540	TbNup48	nucleoporin 48 (TbNup48)	48.494	22.3	0	36.762	1		1.26205	0.101077	0.0278016	1.55593	+	20.1	6	6	1.24199	1.12932	0.0528163	14.952	5	22.3	7	7	1.0913	1.3669	0.135737	11.975	6	20.1	6	6	0.90358	1.3022	0.114678	27.35	5
	328	Tb927.10.11220	Tb927.10.11220	PSSA-2	procyclic form surface phosphoprotein (PSSA-2)	46.04	34.4	0	90.785	1		1.25841	0.0998214	0.00800103	2.09685	+	30.1	7	7	1.36662	1.2557	0.0988852	11.962	7	32.5	8	8	1.0556	1.3256	0.122412	28.621	8	23.1	4	4	0.82192	1.1972	0.0781667	11.903	5
	812	Tb927.11.13510	Tb927.11.13510		hypothetical protein, conserved	20.104	16.7	0	24.56	1	1	1.25442	0.0984417	0.00907676	2.04207	+	8.9	1	1	1.38758	1.28632	0.10935	NaN	1	16.7	2	2	1.0288	1.301	0.114277	33.347	3	16.7	2	2	0.80844	1.1795	0.0716979	10.127	3
	1917	Tb927.7.4800	Tb927.7.4800		hypothetical protein, conserved	12.152	9.7	0.0039474	2.3863	1	1	1.24826	0.0963063	0.0278702	1.55486	+	0	0	0	NaN	NaN		NaN	0	9.7	1	1	0.93252	1.2242	0.0878524	NaN	1	9.7	1	1	0.87836	1.2728	0.10476	NaN	1
	1719	Tb927.6.3510;Tb11.v5.0635	Tb927.6.3510		tRNA modification enzyme, putative	59.67	12.9	0	11.87	2	1	1.24754	0.0960538	0.0279214	1.55406	+	10.7	4	4	1.53586	1.35929	0.133311	19.164	3	10.5	4	4	0.9952	1.2671	0.102811	24.359	4	7.9	3	3	0.77562	1.1273	0.0520395	0.68127	3
	656	Tb927.10.8110	Tb927.10.8110		hypothetical protein, conserved	30.41	10.9	0	10.65	1	1	1.23905	0.093089	0.0264728	1.5772	+	6.9	3	3	1.45501	1.27146	0.104301	21.301	3	6.9	2	2	0.89028	1.1222	0.0500703	19.471	2	6.9	2	2	0.92359	1.3332	0.124895	22.405	3
	872	Tb927.11.15440	Tb927.11.15440		hypothetical protein, conserved	23.683	15	0	6.17	1	1	1.23521	0.0917404	0.0338102	1.47095	+	9.2	2	2	1.39194	1.26334	0.101522	9.6455	2	0	0	0	NaN	NaN		NaN	0	5.8	1	1	0.83573	1.2077	0.0819591	NaN	1
	650	Tb927.10.8010	Tb927.10.8010		hypothetical protein, conserved	28.355	13.1	0	10.159	1	1	1.23486	0.0916193	0.00545856	2.26292	+	7.4	1	1	1.27792	1.19763	0.0783241	NaN	1	7.4	1	1	1.0445	1.2894	0.110388	NaN	1	13.1	2	2	0.83675	1.2194	0.0861462	0.54813	2
	233	Tb927.1.1050;Tb11.v5.0536	Tb927.1.1050		hypothetical protein, conserved	126.7	15.3	0	102.58	2		1.23328	0.0910609	0.00504835	2.29685	+	14.4	13	13	1.30526	1.19881	0.0787507	16.718	15	12.2	11	11	0.95304	1.2171	0.0853263	14.387	12	10.5	8	8	0.8896	1.2856	0.109106	16.081	7
	1374	Tb927.3.4820	Tb927.3.4820		acyltransferase, putative	34.629	4.9	0	20.85	1		1.2317	0.090504	0.00112804	2.94768	+	4.9	1	1	1.35643	1.21806	0.0856673	NaN	1	4.9	1	1	1.0062	1.2563	0.0990934	NaN	1	4.9	1	1	0.83694	1.2211	0.0867512	NaN	1
	1077	Tb927.11.6210	Tb927.11.6210	CYP51	sterol 14-alpha-demethylase (CYP51)	54.372	42.4	0	116.23	1		1.23041	0.090051	0.0170025	1.76949	+	39.5	17	17	1.27233	1.16779	0.067364	14.342	21	40.7	18	18	0.95281	1.2005	0.0793622	13.871	22	35.1	15	15	0.91767	1.3287	0.123427	11.26	19
	1777	Tb927.6.5090	Tb927.6.5090		hypothetical protein, conserved	92.912	8.2	0	12.118	1		1.2275	0.0890198	0.0382335	1.41756	+	5.9	3	3	1.37131	1.25824	0.0997642	24.857	3	6.5	3	3	0.96462	1.1975	0.0782755	10.812	3	2.3	1	1	NaN	NaN		NaN	0
	1978	Tb927.7.7130	Tb927.7.7130		hypothetical protein, conserved	92.781	19.8	0	106.66	1		1.22718	0.0889097	0.0244859	1.61108	+	16	8	8	1.24374	1.11829	0.0485556	18.958	8	13.9	8	8	0.96673	1.2691	0.103496	14.897	8	12.9	6	6	0.89808	1.3022	0.114678	18.083	7
	2200	Tb927.9.10050	Tb927.9.10050		hypothetical protein, conserved	46.936	7.3	0	6.0055	1	1	1.2155	0.0847553	0.0475274	1.32306	+	5	2	2	1.47104	1.3626	0.134369	33.9	2	4.7	2	2	0.88754	1.0884	0.0367885	2.09	2	5	2	2	0.84541	1.2109	0.0831083	25.073	2
	1150	Tb927.11.9230	Tb927.11.9230		hypothetical protein, conserved	37.815	12.5	0	11.308	1		1.21374	0.0841265	0.000287475	3.5414	+	12.5	4	4	1.3412	1.2065	0.0815291	23.079	3	5.9	2	2	0.96943	1.2249	0.0881006	22.315	2	3.7	1	1	0.82876	1.2099	0.0827495	NaN	1
	192	Tb927.8.1640;Tb927.8.1630;Tb927.8.1620;Tb927.8.1610;Tb11.v5.0601	Tb927.8.1640;Tb927.8.1630;Tb927.8.1620;Tb927.8.1610;Tb11.v5.0601		MSP-B, putative;MSP-B, putative;MSP-B, putative;MSP-B, putative;major surface protease gp63, putative	59.905	12.8	0	74.126	5		1.20253	0.0800974	0.0313922	1.50318	+	10.3	3	3	1.26064	1.14184	0.0576049	3.9622	6	12.8	4	4	1.0563	1.325	0.122216	8.0158	5	12.8	4	4	0.78063	1.1494	0.0604712	58.022	6
	758	Tb927.11.11500	Tb927.11.11500		cyclin dependent kinase-binding protein, putative	61.672	7.1	0	13.57	1		1.19481	0.0773001	0.00436569	2.35995	+	2.8	1	1	1.29697	1.19773	0.0783604	NaN	1	0	0	0	NaN	NaN		NaN	0	7.1	2	2	0.82096	1.1919	0.0762398	6.5903	2
	1878	Tb927.7.3500	Tb927.7.3500		glutathione-S-transferase/glutaredoxin, putative	35.436	30.4	0	39.835	1	1	1.18317	0.0730459	0.0173261	1.7613	+	21.5	4	4	1.29707	1.16619	0.0667708	6.5182	5	30.4	6	6	0.89963	1.1288	0.052617	7.0843	7	21.2	3	3	0.8558	1.2582	0.0997497	19.038	4
	227	Tb927.11.11330;Tb11.v5.1035;Tb11.v5.1034;Tb927.11.11290	Tb927.11.11330;Tb11.v5.1035		heat shock protein 70;heat shock protein 70 (hsp70), putative	71.408	59	0	323.31	4		1.18195	0.0726005	0.00108218	2.9657	+	56.1	35	32	1.303	1.19048	0.0757206	13.131	46	51.4	30	28	0.92214	1.1637	0.065841	9.7373	43	55.5	35	32	0.81991	1.1919	0.0762398	13.579	43
	1749	Tb927.6.4250	Tb927.6.4250		hypothetical protein, conserved	24.919	6.8	0	14.521	1		1.16751	0.0672622	0.00823847	2.08415	+	6.8	1	1	1.23267	1.12976	0.0529881	NaN	1	6.8	1	1	0.94267	1.1632	0.0656544	9.2148	2	6.8	1	1	0.85146	1.211	0.0831441	NaN	1
	1071	Tb927.11.6040	Tb927.11.6040		hypothetical protein, conserved	70.825	6.5	0	14.594	1		1.15856	0.0639174	0.0357718	1.44646	+	6.5	3	3	1.18502	1.08935	0.0371666	5.6173	2	4.4	2	2	0.90234	1.1382	0.0562186	28.244	2	2.3	1	1	0.86319	1.2542	0.0983668	NaN	1
	1291	Tb927.3.1890	Tb927.3.1890		cytochrome c oxidase assembly protein, putative	33.231	4.9	0	17.636	1	1	1.15694	0.0633122	0.0400601	1.39729	+	4.9	1	1	1.29757	1.17848	0.0713226	4.1309	2	4.9	1	1	0.91742	1.1358	0.0553019	3.9526	2	0	0	0	NaN	NaN		NaN	0
	1559	Tb927.5.1630	Tb927.5.1630		hypothetical protein, conserved	17.683	21.4	0	8.0858	1		1.15125	0.06117	0.0467655	1.33007	+	21.4	3	3	1.3886	1.26038	0.100502	4.636	3	12.6	2	2	0.88693	1.1197	0.0491017	3.8696	2	21.4	3	3	0.74588	1.0812	0.033906	11.023	3
	2310	Tb927.9.1950	Tb927.9.1950		hypothetical protein, conserved	46.906	13.8	0	14.044	1	1	1.15076	0.060985	0.00533053	2.27323	+	7.1	2	2	1.2664	1.16362	0.0658097	0.52156	2	7.1	2	2	0.89571	1.1179	0.048403	10.855	3	13.8	4	4	0.80548	1.1715	0.0687423	25.017	4
	2416	Tb927.9.8260	Tb927.9.8260	TimRhom I	rhomboid-like protein,serine peptidase, Clan S- , family S54, putative	36.786	4.6	0	14.408	1	1	1.14771	0.0598337	0.00620315	2.20739	+	4.6	1	1	1.28255	1.14464	0.0586674	7.8086	3	4.6	1	1	0.90998	1.1508	0.0609999	3.9722	3	0	0	0	NaN	NaN		NaN	0
	111	Tb11.v5.0537;Tb927.11.9920;Tb11.01.1680.v5	Tb11.v5.0537;Tb927.11.9920;Tb11.01.1680.v5		polyubiquitin, putative;polyubiquitin, putative;polyubiquitin, putative	70.128	49.4	0	35.297	3		1.1372	0.0558374	0.046415	1.33334	+	49.4	4	4	1.36679	1.23706	0.0923897	14.343	8	49.4	4	4	0.86866	1.0853	0.0355498	13.804	6	49.4	4	4	0.76255	1.0954	0.0395727	11.989	5
	1183	Tb927.11.9890	Tb927.11.9890		signal recognition particle receptor alpha subunit, putative	63.526	28.5	0	119.21	1		1.13699	0.0557568	0.0332938	1.47764	+	25.8	11	11	1.32506	1.21054	0.0829777	22.416	12	28.5	12	12	0.85475	1.073	0.0305997	16.241	12	19.1	7	7	0.77593	1.1316	0.0536929	18.593	7
	1402	Tb927.3.750	Tb927.3.750		hypothetical protein, conserved	37.79	18.3	0	45.577	1	1	1.12262	0.0502344	0.0163651	1.78608	+	18.3	5	5	1.19933	1.09573	0.0397051	6.5862	5	18.3	5	5	0.88449	1.102	0.0421816	28.255	6	15.9	4	4	0.81481	1.1717	0.0688164	4.3005	4
	1083	Tb927.11.6420	Tb927.11.6420		hypothetical protein, conserved	144.87	12.2	0	48.343	1		1.11968	0.049094	0.0308234	1.51112	+	10.1	9	9	1.2063	1.10447	0.0431547	14.283	9	6.4	6	6	0.96074	1.1847	0.0736084	14.388	6	6.4	6	6	0.74447	1.0728	0.0305188	16.964	5
	1415	Tb927.4.1020	Tb927.4.1020		serine-palmitoyl-CoA transferase, putative	54.128	50.4	0	147.87	1		1.11915	0.0488887	0.00567756	2.24584	+	43.1	16	16	1.21849	1.11945	0.0490028	14.239	17	47.1	17	17	0.86932	1.0958	0.0397313	18.086	19	40.2	13	13	0.78332	1.1427	0.0579322	19.428	14
	1605	Tb927.5.3360	Tb927.5.3360		50S ribosomal protein L2, putative	46.727	5.8	0	4.037	1	1	1.11679	0.0479728	0.0447332	1.34937	+	5.8	2	2	1.18893	1.07495	0.0313862	25.524	2	5.8	2	2	0.85981	1.0809	0.0337855	0.40394	2	3.4	1	1	0.84003	1.1988	0.0787467	NaN	1
	1255	Tb927.2.5930	Tb927.2.5930		hypothetical protein, conserved	60.489	9	0	33.003	1	1	1.11517	0.0473398	0.0467575	1.33015	+	9	3	3	1.16359	1.03937	0.0167706	3.1801	6	9	3	3	0.91097	1.141	0.0572856	26.94	3	5.9	2	2	0.80619	1.1694	0.0679631	11.142	2
	430	Tb927.10.14840;Tb927.10.14830;Tb927.10.14820	Tb927.10.14840;Tb927.10.14830;Tb927.10.14820	MCP5c;MCP5b;MCP5a	mitochondrial carrier protein (MCP5a);mitochondrial carrier protein (MCP5b);mitochondrial carrier protein,ADP/ATP translocase 1, putative (MCP5c)	34.074	47.6	0	84.657	3	1	1.10896	0.0449175	0.0101743	1.9925	+	38.4	11	11	1.2026	1.08114	0.0338819	10.724	13	41.4	12	12	0.90888	1.1387	0.0564093	10.157	13	32.2	9	9	0.77262	1.1078	0.0444614	6.9257	14
	895	Tb927.11.1620	Tb927.11.1620		hypothetical protein, conserved	21.598	33.3	0	11.034	1	1	1.09875	0.0408991	0.0488517	1.31112	+	33.3	4	4	1.22374	1.11027	0.0454294	24.026	4	13	2	2	0.81727	1.0352	0.0150243	NaN	1	28.1	3	3	0.79442	1.1541	0.0622434	14.796	2
	1863	Tb927.7.3120	Tb927.7.3120	Sm-D1	small nuclear ribonucleoprotein SmD1,SmD-1 like small nuclear ribonucleoprotein (Sm-D1)	11.713	15.1	0	4.0323	1		1.09849	0.0407954	0.0357859	1.44629	+	0	0	0	NaN	NaN		NaN	0	15.1	1	1	0.88274	1.0869	0.0361896	NaN	1	15.1	1	1	0.75964	1.1102	0.0454012	NaN	1
	519	Tb927.10.3300	Tb927.10.3300		hypothetical protein, conserved	61.002	17.2	0	20.524	1		1.09814	0.0406595	0.0407637	1.38973	+	12.4	6	6	1.22073	1.1126	0.0463371	4.805	6	7.9	4	4	0.82913	1.0398	0.0169498	6.634	3	10.7	5	5	0.79224	1.1447	0.0586917	18.756	4
	1108	Tb927.11.7380	Tb927.11.7380		glycerol-3-phosphate dehydrogenase (FAD-dependent), mitochondrial	66.991	38	0	137.68	1	1	1.09662	0.0400554	0.0332278	1.4785	+	33.8	14	14	1.19894	1.10881	0.044856	7.5966	14	34.3	15	15	0.90034	1.1377	0.0560278	15.161	16	26.5	11	11	0.7161	1.0454	0.0192825	11.583	11
	790	Tb927.11.1270	Tb927.11.1270		hypothetical protein, conserved	20.267	30.8	0	20.732	1	1	1.09631	0.0399339	0.0397285	1.4009	+	30.8	5	5	1.15407	1.06736	0.0283113	7.2025	5	30.2	4	4	0.92702	1.1585	0.063896	8.4113	3	30.2	4	4	0.74078	1.0656	0.0275942	6.6808	3
	2327	Tb927.9.3120	Tb927.9.3120		protein kinase, putative	113.39	11.2	0	43.702	1		1.09579	0.039727	0.0426017	1.37057	+	10.1	6	6	1.18203	1.07987	0.0333703	27.547	7	5.3	4	4	0.8337	1.0523	0.0221396	23.742	4	5.1	3	3	0.79481	1.1579	0.0636711	17.39	3
	1043	Tb927.11.5290	Tb927.11.5290	MCP9	mitochondrial carrier protein (MCP9)	29.883	14.2	0	9.5809	1	1	1.09188	0.0381752	0.00340765	2.46754	+	13.8	4	4	1.18819	1.07672	0.0321012	17.694	4	11	3	3	0.87548	1.0956	0.039652	9.3131	4	8.5	3	3	0.75634	1.1035	0.0427723	9.3677	3
	2439	Tb927.9.9710	Tb927.9.9710		hypothetical protein, conserved	36.786	17.9	0	24.154	1		1.08912	0.0370763	0.0195975	1.7078	+	14.6	4	4	1.16497	1.06906	0.0290025	17.659	4	17.9	5	5	0.85379	1.0716	0.0300327	11.053	5	10.7	3	3	0.78472	1.1277	0.0521936	12.737	3
	260	Tb927.1.3030	Tb927.1.3030	KREL2	KREL2 (KREL2)	47.576	10.6	0	10.561	1	1	1.0855	0.0356305	0.0249256	1.60335	+	8.7	2	2	1.18374	1.07319	0.0306774	3.3977	2	10.6	3	3	0.90406	1.1266	0.0517697	22.782	4	5.3	1	1	0.7363	1.0579	0.0244446	NaN	1
	202	Tb927.9.15380;Tb11.v5.0686	Tb927.9.15380;Tb11.v5.0686		NADH-ubiquinone oxidoreductase complex I subunit, putative;hypothetical protein, conserved	42.585	19	0	17.773	2	1	1.08507	0.0354567	0.0264922	1.57688	+	19	6	6	1.16918	1.06416	0.0270061	9.6314	6	6.4	2	2	0.84957	1.0639	0.0269008	11.125	2	8.3	2	2	0.78104	1.1284	0.0524631	0.0033766	2
	1732	Tb927.6.3840	Tb927.6.3840		reticulon domain protein	21.071	17.2	0	8.8006	1		1.08259	0.0344633	0.0470537	1.32741	+	17.2	3	3	1.15189	1.05502	0.0232603	4.3771	3	17.2	3	3	0.90507	1.1409	0.0572476	3.7912	4	17.2	3	3	0.73303	1.0541	0.0228818	12.23	3
	1949	Tb927.7.5940	Tb927.7.5940	PAD2	Protein Associated with Differentiation (TbPAD2)	67.151	17.4	0	161.76	1		1.08159	0.0340615	0.0153484	1.81394	+	17.4	6	2	1.20758	1.107	0.0441488	1.5829	3	15.5	5	2	0.84938	1.0545	0.0230466	9.0856	4	15.5	5	2	0.75339	1.0839	0.0349892	6.5313	3
	1303	Tb927.3.2150	Tb927.3.2150		protein phosphatase 2C, putative	40.009	8.3	0	29.761	1	1	1.08116	0.0338916	0.0379351	1.42096	+	8.3	2	2	1.15857	1.06419	0.02702	9.1394	3	8.3	2	2	0.89497	1.1309	0.0534242	10.1	3	8.3	2	2	0.73111	1.0501	0.0212307	6.5231	3
	168	Tb927.10.540;Tb11.v5.0414	Tb927.10.540;Tb11.v5.0414		ATP-dependent DEAD/H RNA helicase, putative,DEAD box RNA helicase, putative;ATP-dependent DEAD/H RNA helicase, putative	49.226	28.2	0	31.791	2		1.07727	0.0323228	0.0334155	1.47605	+	15.6	5	5	1.18186	1.08012	0.0334736	7.4759	5	17.4	7	7	0.82925	1.0388	0.0165319	15.338	7	26.4	8	8	0.77641	1.1142	0.0469632	25.633	9
	132	Tb927.7.4940;Tb11.v5.0175	Tb927.7.4940;Tb11.v5.0175		oligopeptidase B protein, putative,serine peptidase, clan SC, family S9A-like protein;oligopeptidase B protein, putative	104.35	4.1	0	5.7988	2	1	1.07718	0.0322885	0.0242167	1.61588	+	1.4	1	1	1.15079	1.04717	0.0200193	NaN	1	2.8	2	2	0.83967	1.0748	0.0313277	6.2724	2	2.7	2	2	0.76313	1.1105	0.0455186	2.6235	2
	1747	Tb927.6.4210	Tb927.6.4210	ALDH	aldehyde dehydrogenase, putative (ALDH)	64.566	11.8	0	32.231	1		1.07581	0.0317339	0.0271238	1.56665	+	8.2	4	4	1.14515	1.04043	0.0172133	11.838	3	8.2	3	3	0.87636	1.1053	0.0434802	14.131	3	8.2	3	3	0.74095	1.0827	0.0345081	11.507	3
	646	Tb927.10.7850	Tb927.10.7850		protein-L-isoaspartate, putative	25.68	19.9	0	22.517	1		1.07426	0.0311112	0.0141941	1.84789	+	19.9	2	2	1.21669	1.08828	0.036741	4.7179	2	19.9	2	2	0.86167	1.0869	0.0361896	13.924	2	12.9	1	1	0.69041	1.0481	0.0204027	NaN	1
	724	Tb927.11.10510	Tb927.11.10510		ubiquinone biosynthesis methyltransferase, putative	32.094	25	0	24.243	1	1	1.07271	0.0304837	0.0218097	1.66135	+	19.4	4	4	1.22196	1.10558	0.0435914	4.0772	4	12.5	3	3	0.84484	1.054	0.0228406	10.918	3	3.8	1	1	0.73836	1.0593	0.025019	NaN	1
	1830	Tb927.7.2120	Tb927.7.2120		hypothetical protein, conserved	46.084	24.3	0	51.523	1		1.07215	0.0302554	0.0183495	1.73638	+	9.6	3	3	1.1928	1.08395	0.0350101	5.9964	3	15.7	4	4	0.86502	1.0898	0.0373468	11.579	5	20.7	5	5	0.72162	1.0433	0.0184092	5.2653	5
	1629	Tb927.5.4020	Tb927.5.4020		hypothetical protein	29.347	17.3	0	36.254	1		1.07168	0.030066	0.035516	1.44958	+	12.9	2	2	1.17893	1.08496	0.0354153	20.624	2	6.2	1	1	0.87754	1.0998	0.0413137	NaN	1	4.4	1	1	0.72056	1.0315	0.0134692	NaN	1
	2070	Tb927.8.3380	Tb927.8.3380		electron transfer protein, putative	27.259	24.4	0	31.327	1	1	1.06621	0.0278416	0.0415257	1.38168	+	24.4	6	6	1.15797	1.06837	0.0287197	15.359	7	21.1	5	5	0.86624	1.1021	0.042221	12.805	5	16.9	4	4	0.71323	1.0294	0.0125842	4.3113	4
	874	Tb927.11.15550	Tb927.11.15550	B5R	NADH-cytochrome b5 reductase, putative (B5R)	33.885	9.1	0	8.155	1	1	1.0637	0.0268182	0.00338254	2.47076	+	9.1	2	2	1.16784	1.0644	0.0271032	10.124	2	9.1	2	2	0.84351	1.063	0.0265333	14.251	2	0	0	0	NaN	NaN		NaN	0
	2437	Tb927.9.9660	Tb927.9.9660	ATOM40	hypothetical protein, conserved	38.295	43.6	0	246.63	1	1	1.06264	0.0263862	0.0327475	1.48482	+	43.6	12	12	1.11996	1.03578	0.0152658	9.3162	18	38.2	10	10	0.83142	1.0575	0.0242804	8.4522	14	40.5	9	9	0.75464	1.0955	0.0396124	9.7551	12
	708	Tb927.11.10050	Tb927.11.10050		hypothetical protein, conserved	12.051	25.5	0	10.764	1		1.05938	0.0250509	0.0290517	1.53683	+	14.7	1	1	1.15761	1.06499	0.0273435	NaN	1	0	0	0	NaN	NaN		NaN	0	10.8	1	1	0.72682	1.0538	0.0227582	NaN	1
	221	Tb927.9.3590;Tb11.v5.0904	Tb927.9.3590;Tb11.v5.0904		monothiol glutaredoxin, putative;glutaredoxin-like protein, putative	20.43	16.3	0	6.6018	2	1	1.05739	0.0242337	0.0488424	1.3112	+	16.3	2	2	1.19616	1.08128	0.0339382	16.743	2	16.3	2	2	0.80722	1.0185	0.00796103	18.979	2	16.3	2	2	0.73976	1.0735	0.030802	31.559	2
	98	Tb927.5.4500;Tb05.5K5.150	Tb927.5.4500;Tb05.5K5.150	TbSAR1	ras-like small GTPase, putative (TbSAR1);small GTP-binding protein, putative,BAC from homologous region on chr5	21.771	10.3	0	5.5595	2		1.05669	0.0239474	0.0218734	1.66008	+	4.6	1	1	1.1579	1.05272	0.0223129	NaN	1	5.7	1	1	0.84898	1.0373	0.0159044	NaN	1	10.3	2	2	0.75264	1.0805	0.0336248	4.8343	2
	1294	Tb927.3.1940	Tb927.3.1940		hypothetical protein, conserved	49.435	4.1	0.00097371	3.7794	1	1	1.05571	0.023546	0.0496355	1.30421	+	1.8	1	1	1.13821	1.02122	0.00911974	NaN	1	4.1	2	2	0.86582	1.0886	0.0368683	2.7809	2	1.8	1	1	0.73567	1.0584	0.0246498	NaN	1
	501	Tb927.10.280	Tb927.10.280	COXVI	cytochrome oxidase subunit VI (COXVI)	19.154	39.2	0	25.73	1	1	1.05461	0.0230931	0.0299658	1.52337	+	39.2	6	6	1.14167	1.04933	0.0209117	8.0435	8	38.6	5	5	0.86389	1.0821	0.0342674	9.3334	6	39.2	5	5	0.71769	1.033	0.0141003	11.093	5
	1544	Tb927.5.1160	Tb927.5.1160		hypothetical protein, conserved	25.569	14.9	0	25.132	1		1.05393	0.0228111	0.0349233	1.45688	+	14.9	3	3	1.11167	1.02376	0.010199	10.171	3	14.9	3	3	0.86295	1.0731	0.0306402	22.433	4	8.8	2	2	0.74245	1.0656	0.0275942	7.5508	2
	1635	Tb927.5.4290	Tb927.5.4290		hypothetical protein, conserved	40.083	15.8	0	20.217	1		1.05334	0.0225676	0.00532267	2.27387	+	15.8	4	4	1.15084	1.0495	0.0209845	33.52	5	13	3	3	0.82677	1.046	0.0195317	6.1385	2	7.8	2	2	0.72989	1.0646	0.0271865	1.7693	2
	369	Tb927.10.12840	Tb927.10.12840	MCP12	mitochondrial carrier protein (MCP12)	33.131	30.9	0	66.618	1	1	1.05257	0.0222512	0.0152386	1.81705	+	25.7	6	6	1.16437	1.07178	0.0301044	2.5922	4	22.7	5	5	0.83026	1.0405	0.0172421	7.2856	7	30.9	8	8	0.72256	1.0457	0.0194071	9.6596	10
	1021	Tb927.11.4650	Tb927.11.4650		hypothetical protein, conserved	167.85	5.8	0	88.115	1	1	1.05079	0.0215174	0.0384127	1.41552	+	4.3	5	5	1.17996	1.07325	0.0307005	6.6448	5	5.8	6	6	0.83097	1.058	0.0244857	14.308	6	4.3	5	5	0.70295	1.0218	0.0093659	13.842	5
	1368	Tb927.3.4530	Tb927.3.4530		hypothetical protein, conserved	26.774	50.2	0	202.61	1		1.04936	0.0209248	0.00695206	2.15789	+	44.7	7	7	1.14624	1.05329	0.0225463	6.2548	10	44.3	6	6	0.84493	1.0573	0.0241982	8.4111	9	40.8	7	7	0.71599	1.0376	0.01603	6.3897	10
	2329	Tb927.9.3170	Tb927.9.3170	COXV	cytochrome oxidase subunit V (COXV)	22.229	19.4	0	31.372	1	1	1.04729	0.0200671	0.0121247	1.91633	+	13.8	2	2	1.12797	1.03324	0.0142008	2.4685	3	19.4	3	3	0.83229	1.0492	0.0208583	2.9328	4	19.4	3	3	0.73636	1.0596	0.0251419	4.3606	4
	407	Tb927.10.14000	Tb927.10.14000	ACO	aconitase (ACO)	98.314	35.6	0	193.53	1	1	1.04691	0.0199073	0.0370871	1.43078	+	33.9	20	20	1.12827	1.01976	0.00849925	18.13	18	30.3	18	18	0.84575	1.0578	0.0244036	46.574	19	26.5	15	15	0.7347	1.0637	0.0268192	22.156	16
	146	Tb927.11.7290;Tb11.v5.0254	Tb927.11.7290;Tb11.v5.0254		pantothenate kinase subunit, putative;pantothenate kinase subunit, putative	162.1	56	0	323.31	2	1	1.04645	0.0197187	0.014371	1.84251	+	48.4	49	49	1.12761	1.03055	0.013067	7.675	68	50.2	48	48	0.83937	1.0512	0.0216854	13.663	64	47.9	43	43	0.73734	1.0578	0.0244036	11.179	55
	1589	Tb927.5.2930	Tb927.5.2930		hypothetical protein, conserved	43.308	44.6	0	188.04	1	1	1.04558	0.0193592	0.0351132	1.45453	+	44.6	20	20	1.17104	1.06704	0.0281815	6.2802	27	43.5	19	19	0.81249	1.0481	0.0204027	12.305	23	23.5	9	9	0.70869	1.0221	0.00949339	6.9841	14
	2094	Tb927.8.4810	Tb927.8.4810	PHB1	prohibitin 1 (PHB1)	31.429	30.7	0	48.753	1	1	1.0448	0.0190315	0.00731965	2.13551	+	27.4	8	8	1.12362	1.03768	0.0160626	3.039	7	27.4	8	8	0.82921	1.0409	0.017409	8.1992	6	20.2	7	7	0.73441	1.0559	0.0236228	3.3792	7
	911	Tb927.11.1670	Tb927.11.1670		cysteine desulfurase	48.151	35.9	0	123.14	1	1	1.04367	0.0185617	0.037587	1.42496	+	29.3	9	9	1.12196	1.01808	0.00778233	9.51	10	26.5	8	8	0.83853	1.058	0.0244857	11.139	10	31.6	10	10	0.73526	1.0554	0.0234171	15.712	9
	2358	Tb927.9.5100	Tb927.9.5100	PDEB2	cAMP-specific phosphodiesterase (PDEB2)	103.22	29.6	0	72.381	1		1.04337	0.0184386	0.0177445	1.75094	+	25	16	4	1.12265	1.03202	0.0136898	7.937	5	26.6	18	4	0.81826	1.038	0.0161974	10.398	6	22.3	16	5	0.74159	1.0603	0.0254288	9.2442	6
	115	Tb11.02.5390b;Tb11.02.5390	Tb11.02.5390b;Tb11.02.5390		mRNA processing protein, putative;mRNA processing protein, putative	120.71	21	0	137.44	2	1	1.04272	0.0181663	0.0161512	1.7918	+	19	17	17	1.14538	1.05164	0.021865	25.373	19	17.7	15	15	0.8195	1.0268	0.0114859	19.991	18	10.8	9	9	0.73638	1.0499	0.0211479	10.807	9
	1069	Tb927.11.600	Tb927.11.600		hypothetical protein, conserved	12.081	21.7	0	9.0684	1	1	1.04262	0.0181272	0.0257205	1.58972	+	21.7	1	1	1.14525	1.05867	0.0247614	1.2855	2	21.7	1	1	0.83022	1.0459	0.0194902	0.1852	2	21.7	1	1	0.71243	1.0236	0.0101303	0.80818	2
	1336	Tb927.3.3460	Tb927.3.3460		hypothetical protein, conserved	53.228	35.8	0	92.92	1	1	1.04212	0.0179176	0.0387077	1.4122	+	29.2	13	13	1.15692	1.06352	0.0267473	8.9908	15	27.5	12	12	0.80819	1.0196	0.00842983	17.494	13	34.2	13	13	0.72581	1.0437	0.0185757	16.99	14
	1822	Tb927.7.1790	Tb927.7.1790		Adenine phosphoribosyltransferase, putative	25.624	47.8	0	59.774	1		1.04057	0.0172704	0.0228305	1.64148	+	41.3	6	6	1.14597	1.02825	0.012097	10.271	7	30.4	5	5	0.85157	1.0586	0.0247319	10.464	6	41.7	6	6	0.71365	1.0351	0.0149823	10.949	8
	1663	Tb927.6.1520	Tb927.6.1520	AQP1	aquaporin 3, putative (AQP1)	35.066	23.4	0	135.13	1		1.03929	0.016737	0.0285997	1.54364	+	23.4	5	5	1.15178	1.04056	0.0172675	4.2952	6	23.4	5	5	0.84135	1.0561	0.023705	17.322	6	23.4	5	5	0.70892	1.0215	0.00923837	6.4128	7
	582	Tb927.10.5590	Tb927.10.5590		protein phosphatase 2C, putative	66.75	24.4	0	62.694	1		1.03703	0.0157934	0.00275579	2.55975	+	19.6	9	9	1.14025	1.03143	0.0134389	12.555	9	19.2	10	10	0.83076	1.0398	0.0169498	6.2	10	20.7	9	9	0.70152	1.0399	0.0169916	8.4888	9
	2373	Tb927.9.5960	Tb927.9.5960		succinate dehydrogenase, putative	21.281	14.4	0	16.622	1	1	1.03685	0.0157138	0.0459896	1.33734	+	7.4	1	1	1.15805	1.05957	0.0251292	NaN	1	11.7	2	2	0.82616	1.034	0.0145205	0.049714	2	14.4	3	3	0.70918	1.0174	0.00749173	29.033	3
	1323	Tb927.3.2880	Tb927.3.2880		hypothetical protein, conserved	12.643	23.1	0	19.818	1	1	1.03612	0.01541	0.0198915	1.70133	+	23.1	3	3	1.10793	1.02202	0.00946152	0.62569	2	23.1	3	3	0.82833	1.0387	0.0164901	2.4714	2	23.1	3	3	0.72773	1.0478	0.0202784	2.222	3
	694	Tb927.10.9810	Tb927.10.9810		hypothetical protein, conserved	33.886	34.6	0	89.104	1	1	1.03539	0.0151027	0.0380808	1.41929	+	27.9	6	6	1.14324	1.03018	0.0129148	5.4225	5	18.6	4	4	0.81685	1.0204	0.00877045	19.452	4	24.9	5	5	0.73521	1.0559	0.0236228	23.767	7
	2203	Tb927.9.10310	Tb927.9.10310	MCP11	mitochondrial carrier protein (MCP11)	34.295	39.7	0	80.772	1	1	1.03248	0.0138802	0.0030306	2.51847	+	30	7	7	1.13662	1.03655	0.0155898	6.5431	8	35.6	10	10	0.82861	1.0332	0.0141844	20.302	14	36.3	10	10	0.71398	1.0277	0.0118664	12.222	13
	465	Tb927.10.180	Tb927.10.180		ATP synthase F1 subunit gamma protein, putative	34.37	42	0	147.58	1	1	1.02979	0.0127485	0.00620642	2.20716	+	42	10	10	1.12371	1.0366	0.015612	13.362	12	38.7	8	8	0.81578	1.0261	0.0111897	5.56	11	34.8	7	7	0.7048	1.0267	0.0114436	10.679	10
	106	Tb927.10.4330;Tb11.v5.1012;Tb10.v4.0043	Tb927.10.4330;Tb11.v5.1012;Tb10.v4.0043		2-oxoisovalerate dehydrogenase beta subunit, mitochondrial precursor, putative;2-oxoisovalerate dehydrogenase beta subunit, mitochondrial precursor, putative;branched-chain alpha-keto acid dehydrogenase e1-beta subunit precursor, putative,chrX additional	40.222	63.6	0	236.45	3		1.02776	0.0118935	0.0147522	1.83114	+	45.9	10	10	1.11392	1.01816	0.00781774	12.331	13	60.1	13	13	0.81586	1.0307	0.0131323	12.469	18	60.6	12	12	0.68759	1.0345	0.0147305	19.636	14
	1272	Tb927.3.1380	Tb927.3.1380		ATP synthase beta chain, mitochondrial precursor,ATP synthase F1, beta subunit	55.775	62	0	323.31	1	1	1.02635	0.0112936	0.0468859	1.32896	+	59.5	18	18	1.131	1.04276	0.018186	7.7852	30	56.6	17	17	0.81855	1.024	0.0103	3.8689	31	62	20	20	0.70787	1.0125	0.00539503	7.7315	37
	1115	Tb927.11.7780	Tb927.11.7780	ATOM46	hypothetical protein, conserved	46.237	43.7	0	149.72	1	1	1.02559	0.0109729	0.00214959	2.66764	+	38.9	11	11	1.11058	1.02377	0.0102032	9.1243	14	43.7	13	13	0.81707	1.029	0.0124154	13.984	15	37.9	11	11	0.71411	1.024	0.0103	16.83	11
	641	Tb927.10.7620	Tb927.10.7620		mitochondrial ATP-dependent zinc metallopeptidase, putative,metallo-peptidase, Clan MA(E) Family M41	71.088	30.4	0	222.36	1	1	1.02473	0.0106082	0.0456121	1.34092	+	30	16	16	1.15607	1.04087	0.0173986	11.776	23	25.7	14	14	0.80228	1.0144	0.00620924	6.9549	21	24.2	12	12	0.70281	1.0191	0.0082168	11.647	17
	1728	Tb927.6.3800;Tb927.6.3750;Tb927.6.3740	Tb927.6.3800;Tb927.6.3750;Tb927.6.3740		heat shock 70 kDa protein, mitochondrial precursor, putative;heat shock 70 kDa protein, mitochondrial precursor, putative;heat shock 70 kDa protein, mitochondrial precursor, putative	71.474	61.2	0	323.31	3	1	1.02236	0.00960327	0.0389179	1.40985	+	60.4	43	43	1.11743	1.02791	0.0119542	8.9946	80	59.4	43	43	0.80119	1.0091	0.00393421	36.122	76	57.5	38	38	0.71716	1.0302	0.0129215	9.7498	74
	740	Tb927.11.10950	Tb927.11.10950		hypothetical protein, conserved	36.848	4	0.0059804	2.1459	1		1.01573	0.00677692	0.0452926	1.34397	+	4	1	1	1.12208	1.01346	0.00580618	NaN	1	4	1	1	0.80502	1.018	0.00774778	NaN	1	0	0	0	NaN	NaN		NaN	0
	274	Tb927.1.4400	Tb927.1.4400		hypothetical protein, conserved	30.868	17	0	13.052	1		1.00664	0.00287587	0.0217398	1.66275	+	17	3	3	1.10586	1.00619	0.00267913	10.398	3	8	1	1	0.813	1.0071	0.0030726	NaN	1	0	0	0	NaN	NaN		NaN	0
	1152	Tb927.11.9320	Tb927.11.9320		hypothetical protein, conserved	23.715	17.1	0	22.417	1		1.16226	0.0653028	0.0503976	1.29759		17.1	2	2	1.24028	1.13469	0.0548761	3.3534	2	7.6	1	1	0.9551	1.1905	0.0757294	NaN	1	0	0	0	NaN	NaN		NaN	0
	1646	Tb927.5.890	Tb927.5.890		oligosaccharyl transferase subunit, putative	89.347	12.6	0	18.264	1		3.00688	0.478115	0.0517536	1.28606		9.2	5	1	3.49174	3.17945	0.502352	64.149	2	8.5	5	2	1.1887	1.5044	0.177363	161.88	2	6.5	4	1	3.9096	5.6837	0.754631	NaN	1
	1943	Tb927.7.5790	Tb927.7.5790		protein disulfide isomerase, putative	15.401	7.4	0.0023052	2.884	1		1.23396	0.0913	0.0537682	1.26947		0	0	0	NaN	NaN		NaN	0	7.4	1	1	0.94842	1.1905	0.0757294	NaN	1	7.4	1	1	0.89003	1.279	0.106871	NaN	1
	2309	Tb927.9.1780	Tb927.9.1780	SLY1	sec1 family transport protein, putative (SLY1)	69.022	21.9	0	116.07	1		1.05508	0.0232845	0.0538201	1.26906		20.3	10	10	1.18569	1.07989	0.0333795	21.714	11	17.4	10	10	0.80423	1.0157	0.00676545	10.558	9	12.4	7	7	0.7355	1.0708	0.0297084	19.596	7
	116	Tb11.02.5420b;Tb11.02.5420	Tb11.02.5420b;Tb11.02.5420	CPR	NADPH-cytochrome p450 reductase, putative;NADPH-cytochrome p450 reductase, putative (CPR)	69.959	17.7	0	41.325	2		1.55171	0.190811	0.0542811	1.26535		11.6	6	2	1.45592	1.30269	0.114842	NaN	1	16	9	4	1.0826	1.3486	0.129883	26.507	3	9.8	5	1	1.4871	2.1267	0.327706	NaN	1
	473	Tb927.10.2030	Tb927.10.2030		hypothetical protein, conserved	69.058	17.9	0	90.923	1	1	1.0605	0.0255089	0.0548591	1.26075		16.6	7	7	1.17677	1.10243	0.0423494	13.372	8	16	7	7	0.83046	1.0559	0.0236228	13.183	10	7.5	3	3	0.70751	1.0246	0.0105544	18.841	3
	1012	Tb927.11.4330	Tb927.11.4330		hypothetical protein, conserved	21.02	16.9	0	4.7646	1	1	2.08021	0.318107	0.0560394	1.25151		16.9	2	2	1.35674	1.23384	0.0912578	NaN	1	16.9	2	2	2.3961	3.0048	0.477816	140.77	2	16.9	2	2	1.6719	2.428	0.385249	118.78	2
	1177	Tb927.11.9780	Tb927.11.9780		conserved protein	118.85	15.4	0	51.405	1		1.03946	0.0168074	0.0562412	1.24995		11	8	8	1.11924	1.03061	0.0130939	64.406	8	12	9	9	0.85364	1.0687	0.0288558	10.524	9	12.9	8	8	0.70491	1.0197	0.00847242	25.262	8
	2295	Tb927.9.15010	Tb927.9.15010		hypothetical protein, conserved	23.182	20.6	0	12.223	1	1	1.10371	0.0428545	0.0576247	1.23939		20.6	4	4	1.28141	1.17721	0.0708521	11.207	3	11.3	2	2	0.87866	1.1019	0.0421422	16.289	2	9.8	2	2	0.71087	1.0365	0.0155693	5.3024	2
	374	Tb927.10.12930	Tb927.10.12930		hypothetical protein, conserved	23.985	27.1	0	7.6692	1	1	1.06553	0.0275646	0.0576776	1.23899		17.4	2	2	1.14534	1.04388	0.0186527	23.6	2	27.1	3	3	0.83459	1.0375	0.0159881	5.3355	3	22.7	2	2	0.77566	1.117	0.0480532	2.9507	2
	2426	Tb927.9.9000	Tb927.9.9000	idi1	isopentenyl-diphosphate delta-isomerase (type II), putative	38.986	18	0	56.462	1		1.05399	0.022835	0.0584306	1.23336		12.6	3	3	1.17305	1.07648	0.0320076	23.604	4	14.9	4	4	0.80257	1.0132	0.00569518	1.4674	3	16	4	4	0.74095	1.0735	0.030802	8.2956	4
	2360	Tb927.9.5260	Tb927.9.5260		hypothetical protein, conserved	54.871	9.4	0	10.387	1		2.59147	0.413546	0.0603159	1.21957		9.4	4	4	3.42736	3.11071	0.49286	34.532	4	7	3	3	1.7194	2.1589	0.334233	4.997	2	0	0	0	NaN	NaN		NaN	0
	1202	Tb927.2.2520;Tb927.2.2510	Tb927.2.2520;Tb927.2.2510	VDAC;VDAC_2	voltage-dependent anion-selective channel;voltage-dependent anion-selective channel	29.189	64.4	0	313.98	2	1	1.05827	0.0245978	0.0613434	1.21223		60.7	13	13	1.20744	1.09844	0.0407771	5.9509	19	59.6	12	12	0.8097	1.0182	0.00783309	11.149	16	57.8	13	13	0.73489	1.0597	0.0251829	10.751	20
	1876	Tb927.7.3440;Tb927.7.3450	Tb927.7.3440		I/6 autoantigen	27.05	35	0	74.672	2		1.02265	0.0097289	0.0619955	1.20764		35	4	4	1.09892	1.0051	0.00220754	0.6125	6	35	4	4	0.8231	1.0334	0.0142685	2.3966	6	23.2	3	3	0.71738	1.0297	0.0127107	11.873	5
	1398	Tb927.3.5630	Tb927.3.5630		3,2-trans-enoyl-CoA isomerase, mitochondrial precursor, putative	33.883	18.6	0	48.638	1		1.07254	0.0304144	0.0625009	1.20411		10	3	3	1.17298	1.04566	0.0193922	37.804	3	5.8	2	2	0.88657	1.1329	0.0541916	7.2036	2	18.6	5	5	0.71808	1.0415	0.0176593	13.773	5
	2408	Tb927.9.7980	Tb927.9.7980		hypothetical protein, conserved	15.754	20.9	0	8.869	1		1.40908	0.148936	0.06308	1.20011		20.9	1	1	1.18453	1.08169	0.0341024	NaN	1	20.9	1	1	1.3369	1.6851	0.226626	NaN	1	20.9	1	1	1.0604	1.5349	0.18608	NaN	1
	1352	Tb927.3.3890	Tb927.3.3890		hypothetical protein, conserved	36.68	37.5	0	54.52	1	1	1.04441	0.0188724	0.0633136	1.1985		26.9	9	9	1.12738	1.02226	0.00956349	32.444	11	31.9	7	7	0.8314	1.0804	0.0335846	17.224	8	27.5	6	6	0.71618	1.0315	0.0134692	7.9529	6
	2378	Tb927.9.6310	Tb927.9.6310		ABC transporter, putative	72.215	10.2	0	25.968	1		1.35243	0.131115	0.0635177	1.19711		10.2	4	4	1.51791	1.38406	0.141156	6.9585	5	4.5	2	2	1.311	1.6421	0.2154	15.513	2	1.9	1	1	0.75405	1.0884	0.0367885	12.49	2
	2191	Tb927.8.820	Tb927.8.820		hypothetical protein, conserved	61.686	32.9	0	117.9	1		1.04607	0.0195617	0.0644681	1.19066		26.2	11	11	1.17149	1.07473	0.0312978	10.307	14	32.9	13	13	0.79993	1.0111	0.00479411	19.233	15	24.4	8	8	0.73049	1.0534	0.0225933	12.779	10
	273	Tb927.1.4230	Tb927.1.4230		hypothetical protein, conserved	49.86	21.8	0	25.372	1		1.11804	0.0484579	0.0645853	1.18987		13.6	5	5	1.1165	1.02349	0.0100832	27.232	6	14.6	4	4	0.95007	1.18	0.071882	31.192	4	3.1	1	1	0.80412	1.1572	0.0634084	NaN	1
	1186	Tb927.11.9980	Tb927.11.9980		2-oxoglutarate dehydrogenase E1 component, putative	112.95	57.7	0	323.31	1	1	1.00658	0.00284895	0.0654724	1.18394		53.3	46	46	1.09268	1.00237	0.00102633	18.535	69	53.2	45	45	0.80591	1.0115	0.00496589	9.404	61	53.7	45	45	0.69633	1.0059	0.00255481	8.6484	58
	154	Tb11.v5.0306;Tb927.10.15970	Tb11.v5.0306;Tb927.10.15970		class 3 lipase, putative;class 3 lipase, putative,triacylglycerol lipase, putative	58.923	7.3	0	12.197	2		1.18683	0.0743898	0.0656192	1.18297		7.3	2	2	1.20211	1.09467	0.039282	7.9712	2	3.4	1	1	1.0813	1.3616	0.13405	NaN	1	3.9	1	1	0.76632	1.1216	0.049838	NaN	1
	490	Tb927.10.2470	Tb927.10.2470		hypothetical protein, conserved	64.233	6.4	0.0018806	3.1891	1		1.59337	0.202316	0.0659899	1.18052		6.4	2	2	1.53669	1.44465	0.159762	32.077	3	0	0	0	NaN	NaN		NaN	0	2	1	1	1.207	1.7574	0.244871	NaN	1
	663	Tb927.10.8320	Tb927.10.8320	COXIX	cytochrome oxidase subunit IX (COXIX)	13.786	13.7	0	7.2231	1	1	1.14589	0.0591439	0.0661245	1.17964		13.7	1	1	1.12702	1.03456	0.0147578	NaN	1	13.7	1	1	0.93385	1.1634	0.0657291	NaN	1	13.7	1	1	0.87146	1.2501	0.0969448	NaN	1
	825	Tb927.11.13890	Tb927.11.13890		hypothetical protein, conserved	30.693	35.1	0	27.665	1	1	1.06339	0.0266926	0.0663502	1.17816		25.4	6	6	1.1586	1.05456	0.0230725	2.202	5	27.6	6	6	0.80066	1.0233	0.010003	6.794	5	18.3	4	4	0.78079	1.1143	0.0470021	9.07	4
	613	Tb927.10.6840	Tb927.10.6840		hypothetical protein, conserved	34.255	19	0	11.592	1		1.66668	0.221853	0.0667349	1.17565		8.1	2	2	1.24521	1.15177	0.0613654	13.099	2	10.8	2	2	1.3458	1.6988	0.230142	15.349	2	5.8	1	1	1.6074	2.3662	0.374051	NaN	1
	1721	Tb927.6.3600	Tb927.6.3600		hypothetical protein, conserved	49.213	19.4	0	20.508	1	1	1.11722	0.0481378	0.066783	1.17533		13.2	5	5	1.15683	1.04596	0.0195147	32.296	5	13	5	5	0.87215	1.0945	0.0392158	24.631	6	12.3	4	4	0.85189	1.2181	0.0856829	31.102	4
	1746	Tb927.6.4200	Tb927.6.4200		hypothetical protein, conserved	50.398	22.5	0	102.45	1	1	1.05316	0.0224936	0.0671188	1.17316		16.7	5	5	1.201	1.07528	0.0315216	10.245	6	16.4	5	5	0.78564	1.0095	0.00410632	13.623	6	16	5	5	0.74324	1.0761	0.0318526	8.3183	4
	1969	Tb927.7.690	Tb927.7.690		zinc finger protein, putative	53.865	5.7	0	5.456	1		1.20039	0.0793239	0.0671234	1.17313		5.7	2	2	1.15243	1.03399	0.0145151	4.0498	2	5.7	2	2	1.0356	1.2875	0.109747	33.278	2	2.5	1	1	0.89413	1.2993	0.113709	5.4518	2
	2157	Tb927.8.6830	Tb927.8.6830		kinesin, putative	198.66	4.3	0	12.758	1		1.08187	0.0341756	0.0677773	1.16892		0.9	1	1	1.26078	1.15003	0.0607103	NaN	1	2.5	4	4	0.86619	1.0689	0.0289371	32.028	4	3.7	5	5	0.70205	1.0301	0.0128794	16.955	5
	2282	Tb927.9.14160	Tb927.9.14160	RISP	rieske iron-sulfur protein, mitochondrial precursor (RISP)	33.655	45.1	0	158.76	1	1	1.0336	0.0143532	0.0679406	1.16787		35.7	9	9	1.13939	1.03538	0.0150994	5.145	12	37.7	10	10	0.80548	1.0087	0.00376202	6.3421	15	38.7	9	9	0.73521	1.0573	0.0241982	9.1495	14
	1848	Tb927.7.2700	Tb927.7.2700	B5R	NADH-cytochrome b5 reductase, putative (B5R)	31.856	59.9	0	205.12	1	1	1.00898	0.00388208	0.0697465	1.15648		59.9	17	17	1.10444	1.01558	0.00671371	20.667	24	53	15	15	0.8051	1.0025	0.00108438	26.922	22	48.1	15	15	0.70435	1.0089	0.00384812	20.49	22
	821	Tb927.11.13710	Tb927.11.13710		hypothetical protein, conserved	20.895	16.2	0	11.799	1	1	1.23376	0.0912308	0.0697743	1.1563		16.2	2	2	1.16439	1.06604	0.0277739	13.448	2	8.1	1	1	1.1474	1.4448	0.159808	NaN	1	8.1	1	1	0.84344	1.2193	0.0861106	NaN	1
	1797	Tb927.7.1080	Tb927.7.1080		hypothetical protein, conserved	40.968	19.4	0	16.733	1	1	1.18618	0.0741509	0.069938	1.15529		19.4	5	5	1.15907	1.0533	0.0225508	4.5822	4	3.1	1	1	1.0649	1.349	0.130012	NaN	1	7.5	2	2	0.80641	1.1746	0.06989	5.7013	2
	678	Tb927.10.9080	Tb927.10.9080		pteridine transporter, putative	69.998	8.8	0	41.5	1	1	1.14544	0.0589738	0.0705599	1.15144		7.3	4	4	1.46623	1.28442	0.108708	12.329	4	8.8	5	5	0.86584	1.0811	0.0338659	32.04	5	5.8	2	2	0.74852	1.0823	0.0343477	6.5751	2
	2441	Tb927.9.9810	Tb927.9.9810		hypothetical protein, conserved	16.882	7.2	0	7.1915	1		1.39182	0.143584	0.0707469	1.15029		7.2	1	1	1.42385	1.29162	0.111136	NaN	1	0	0	0	NaN	NaN		NaN	0	7.2	1	1	1.0373	1.4998	0.176033	NaN	1
	173	Tb927.1.2390;Tb927.1.2370;Tb927.1.2350;Tb927.1.2330;Tb11.v5.0469;Tb927.1.2410	Tb927.1.2390;Tb927.1.2370;Tb927.1.2350;Tb927.1.2330;Tb11.v5.0469;Tb927.1.2410		beta tubulin;beta tubulin;beta tubulin;beta tubulin;beta tubulin, putative;beta tubulin, pseudogene	49.704	80.8	0	323.31	6		1.00341	0.00148049	0.0708122	1.14989		80.5	26	26	1.09642	1.00325	0.00140917	7.5249	56	80.5	25	25	0.80304	1.001	0.000434077	15.196	60	80.8	27	27	0.70402	1.006	0.00259798	8.8436	64
	534	Tb927.10.3810	Tb927.10.3810		hypothetical protein, conserved	64.888	13.9	0	26.27	1		1.32754	0.123046	0.0715769	1.14523		10.8	4	4	1.17833	1.06806	0.0285944	32.204	4	9.1	4	4	1.0802	1.3525	0.131137	6.2508	4	3	2	2	1.1175	1.6196	0.209408	7.1252	2
	1216	Tb927.2.3610	Tb927.2.3610		hypothetical protein, conserved	16.06	41	0	80.655	1	1	1.05788	0.0244375	0.0716935	1.14452		41	6	6	1.18462	1.07666	0.0320778	2.5465	10	41	6	6	0.80443	1.0089	0.00384812	7.6987	10	34.7	4	4	0.76372	1.0899	0.0373867	8.2765	5
	1774	Tb927.6.4990	Tb927.6.4990		ATP synthase, epsilon chain, putative	20.147	49.5	0	79.602	1	1	1.02726	0.011679	0.0722127	1.14139		46.7	7	7	1.11742	1.02498	0.010715	14.547	12	46.7	7	7	0.83232	1.049	0.0207755	6.9246	12	42.3	6	6	0.70116	1.0082	0.00354669	5.6727	12
	1466	Tb927.4.2850	Tb927.4.2850		hypothetical protein, conserved	72.637	4.1	0	7.754	1		1.11069	0.0455911	0.0726082	1.13901		4.1	2	2	1.24335	1.14394	0.058404	10.246	2	4.1	2	2	0.94631	1.1782	0.071219	51.186	2	4.1	2	2	0.69519	1.0166	0.00715011	12.711	2
	967	Tb927.11.2940	Tb927.11.2940		hypothetical protein, conserved	41.286	4.3	0	3.9907	1		1.166	0.0666983	0.0730637	1.1363		0	0	0	NaN	NaN		NaN	0	4.3	1	1	0.88889	1.1249	0.0511139	NaN	1	4.3	1	1	0.84825	1.2086	0.0822826	NaN	1
	2376	Tb927.9.6230;Tb927.9.6170;Tb927.9.6290	Tb927.9.6230;Tb927.9.6170;Tb927.9.6290	AK;AK;AK	unspecified product (AK);arginine kinase (AK);arginine kinase (AK)	41.597	30.8	0	90.945	3		1.04582	0.0194568	0.0737119	1.13246		27.8	8	8	1.12075	1.03145	0.0134478	22.449	8	28.4	8	8	0.814	1.0205	0.00881301	29.171	9	19.7	5	5	0.75319	1.0867	0.0361097	21.054	5
	819	Tb927.11.13650	Tb927.11.13650	CYB5	cytochrome b5, putative (CYB5)	12.906	15.1	0	4.7391	1		1.59664	0.203206	0.0743915	1.12848		15.1	1	1	1.15023	1.06308	0.0265672	NaN	1	15.1	1	1	1.5107	1.9034	0.27953	NaN	1	15.1	1	1	1.3926	2.0115	0.30352	NaN	1
	923	Tb927.11.1700	Tb927.11.1700		hypothetical protein, conserved	61.63	15.6	0	34.917	1	1	1.12103	0.0496171	0.0757342	1.12071		10.4	3	3	1.36073	1.23977	0.0933418	23.51	4	12.5	4	4	0.86691	1.0696	0.0292214	19.251	3	11.4	3	3	0.73702	1.0624	0.0262881	12.019	3
	1826	Tb927.7.1920	Tb927.7.1920	PFC5	paraflagellar rod component, putative (PFC5)	59.271	14	0	24.187	1		1.06371	0.0268231	0.0773163	1.11173		14	6	6	1.21109	1.08884	0.0369633	27.278	5	6.6	3	3	0.88413	1.0979	0.0405628	7.1766	2	4.1	2	2	0.69792	1.0068	0.00294321	3.1076	2
	2345	Tb927.9.4190	Tb927.9.4190	ACS1	fatty acyl CoA syntetase 1 (ACS1)	78.959	27.9	0	71.926	1		1.05739	0.0242356	0.0775734	1.11029		23.4	13	13	1.1029	1.00624	0.00270115	13.547	12	20.8	11	11	0.86683	1.0898	0.0373468	20.129	11	21.1	10	10	0.74181	1.0781	0.032659	15.633	10
	275	Tb927.1.4420	Tb927.1.4420		ABC transporter, putative	104.68	26.5	0	110.43	1		1.09346	0.0388027	0.0782276	1.10664		20.3	14	14	1.26451	1.14562	0.0590406	24.688	13	17.5	12	12	0.80057	1.0093	0.00402027	20.947	12	16.4	11	11	0.77526	1.1307	0.0533474	19.392	10
	1595	Tb927.5.3060	Tb927.5.3060		hypothetical protein, conserved	36.657	10.8	0	6.7195	1		1.11623	0.0477536	0.0782753	1.10638		10.8	2	2	1.27782	1.17517	0.0701011	47.163	2	4.8	1	1	0.81129	1.011	0.00475116	NaN	1	10.8	2	2	0.81513	1.1706	0.0684085	11.588	2
	1269	Tb927.3.1320	Tb927.3.1320		hypothetical protein, conserved	124.78	4.1	0	6.4387	1		1.23399	0.091312	0.0785277	1.10498		1	1	1	1.24065	1.14557	0.0590205	NaN	1	2.3	2	2	1.1832	1.4898	0.173128	48.596	2	2.8	2	2	0.76526	1.101	0.0417873	30.094	2
	1884	Tb927.7.3770	Tb927.7.3770		hypothetical protein, conserved	61.111	8.9	0	17.58	1	1	1.21445	0.0843785	0.0785708	1.10474		2.3	1	1	1.2608	1.13359	0.0544575	NaN	1	4.5	2	2	0.85417	1.0931	0.0386599	11.39	2	8.9	4	4	0.99185	1.4455	0.160018	50.902	3
	1947	Tb927.7.5890	Tb927.7.5890		hypothetical protein, conserved	73.556	7.7	0	21.247	1		1.13982	0.0568361	0.0788309	1.1033		7.7	3	3	1.38656	1.26397	0.101736	29.011	3	7.7	3	3	0.84257	1.0296	0.0126685	11.429	3	5.7	2	2	0.78834	1.1379	0.0561041	34.949	2
	1604	Tb927.5.3350	Tb927.5.3350		iron superoxide dismutase, putative	26.824	29	0	48.867	1	1	1.05961	0.0251455	0.0803445	1.09504		21.8	3	3	1.24258	1.11708	0.0480847	13.767	3	29	5	5	0.82336	1.0363	0.0154855	23.643	5	29	4	4	0.69772	1.0277	0.0118664	22.147	5
	607	Tb927.10.6630	Tb927.10.6630	HEL64	ATP-dependent DEAD/H RNA helicase HEL64, putative (HEL64)	64.082	4.6	0	5.0965	1		1.45538	0.162977	0.0805999	1.09367		3	1	1	NaN	NaN		NaN	0	4.6	2	2	1.041	1.3207	0.120804	NaN	1	1.6	1	1	1.0511	1.6038	0.20515	NaN	1
	147	Tb927.11.7250;Tb11.v5.0257	Tb927.11.7250;Tb11.v5.0257		hypothetical protein, conserved;hypothetical protein, conserved	53.363	11.3	0	26.665	2	1	1.07085	0.0297284	0.0807785	1.0927		8.9	3	3	1.14124	1.04526	0.0192243	30.088	3	11.3	4	4	0.82357	1.0307	0.0131323	7.1972	4	11.3	4	4	0.78359	1.1398	0.0568287	9.449	4
	1638	Tb927.5.530	Tb927.5.530		hypothetical protein, conserved	71.4	12.7	0	34.969	1	1	1.03463	0.014787	0.0809862	1.09159		10.4	5	5	1.11535	1.00887	0.00383435	21.33	5	12.7	6	6	0.80473	1.031	0.0132587	11.395	6	6.1	3	3	0.73613	1.0648	0.027268	14.613	3
	657	Tb927.10.8170	Tb927.10.8170		nuclear pore complex protein (NUP155), putative,nucleoporin, putative	144.37	29.4	0	235.54	1		1.02729	0.0116933	0.0813618	1.08958		20	19	19	1.10132	1.00255	0.00110431	11.648	22	23.6	19	19	0.83385	1.0443	0.0188253	13.632	20	20.8	17	17	0.71571	1.0355	0.0151501	21.327	19
	2088	Tb927.8.4380	Tb927.8.4380	ATOM12	hypothetical protein, conserved	11.86	14.3	0	17.228	1	1	1.16024	0.0645486	0.0815051	1.08882		11.4	1	1	1.18026	1.08655	0.0360517	NaN	1	11.4	1	1	1.0605	1.3311	0.124211	NaN	1	14.3	2	2	0.7433	1.0799	0.0333835	0.63342	2
	1224	Tb927.2.4110	Tb927.2.4110		mitochondrial processing peptidase alpha subunit, putative,metallo-peptidase, Clan ME, Family M16	52.064	16.8	0	38.603	1	1	1.06289	0.0264877	0.0819943	1.08622		8.3	3	3	1.15081	1.04854	0.0205838	27.742	3	9.8	3	3	0.80906	1.0204	0.00877045	14.492	3	9.6	3	3	0.76604	1.1223	0.050109	10.347	4
	1240	Tb927.2.4900;Tb927.2.4750	Tb927.2.4900;Tb927.2.4750		hypothetical protein, conserved;hypothetical protein, conserved	34.716	42.3	0	76.423	2		1.13637	0.0555195	0.0824767	1.08367		33.7	7	7	1.2089	1.11224	0.0461969	27.129	8	38.3	8	8	1.0078	1.2713	0.104248	299.91	8	26.4	5	5	0.71263	1.0378	0.0161137	33.885	5
	2324	Tb927.9.3000	Tb927.9.3000		cytidine deaminase, putative	19.171	64.8	0	128.99	1	1	1.0142	0.00612513	0.0826035	1.083		49.5	6	6	1.08257	1.00144	0.000625802	19.209	8	49.5	6	6	0.81659	1.0175	0.00753442	5.5586	9	64.8	8	8	0.71249	1.0238	0.0102151	4.647	11
	2278	Tb927.9.14050	Tb927.9.14050		hypothetical protein, conserved	58.727	8.2	0	6.4968	1	1	1.22408	0.0878099	0.0826967	1.08251		2.7	1	1	1.21502	1.08814	0.0366844	NaN	1	5.3	2	2	1.1815	1.4752	0.168851	3.4772	2	5.5	2	2	0.76448	1.1426	0.0578942	17.528	2
	1072	Tb927.11.6100	Tb927.11.6100		hypothetical protein, conserved	33.374	17.7	0	16.516	1	1	1.12709	0.0519586	0.0829696	1.08108		17.7	4	4	1.35988	1.26046	0.10053	33.711	4	14.7	3	3	0.85153	1.0621	0.0261654	32.425	3	9.7	2	2	0.73853	1.0695	0.0291808	29.456	2
	2182	Tb927.8.7980;Tb927.4.4380	Tb927.8.7980;Tb927.4.4380	PPase1;TVP1	vacuolar-type proton translocating pyrophosphatase 1 (TVP1);vacuolar-type proton translocating pyrophosphatase 1, putative (PPase1)	86.003	18.8	0	89.559	2		1.09233	0.0383528	0.0862218	1.06438		16.5	9	9	1.28	1.17727	0.0708776	22.324	8	15.1	9	9	0.81338	1.0167	0.00719282	17.354	8	17.9	10	10	0.75313	1.0889	0.036988	15.735	12
	254	Tb927.1.2550;Tb927.1.2530;Tb927.1.2510;Tb927.1.2490;Tb927.1.2470;Tb927.1.2450;Tb927.1.2430	Tb927.1.2550;Tb927.1.2530;Tb927.1.2510;Tb927.1.2490;Tb927.1.2470;Tb927.1.2450;Tb927.1.2430		histone H3, putative;histone H3, putative;histone H3, putative;histone H3, putative;histone H3, putative;histone H3, putative;histone H3, putative	14.75	19.5	0	16.083	7		1.23257	0.0908122	0.0880107	1.05546		19.5	1	1	1.61249	1.51044	0.179103	NaN	1	19.5	1	1	0.90078	1.1181	0.0484806	NaN	1	19.5	1	1	0.76708	1.1088	0.0448532	NaN	1
	2387	Tb927.9.6710	Tb927.9.6710		flavoprotein monooxygenase, putative	66.234	4.2	0.001443	3.5857	1	1	1.08074	0.0337195	0.0883174	1.05395		0	0	0	NaN	NaN		NaN	0	1.8	1	1	0.84415	1.0571	0.0241161	10.518	2	2.4	1	1	0.78206	1.1049	0.043323	NaN	1
	1118	Tb927.11.8040	Tb927.11.8040		hypothetical protein, conserved	22.255	19.5	0	18.608	1	1	1.059	0.0248953	0.0887393	1.05188		19.5	2	2	1.11257	1.0147	0.00633894	7.7118	3	14.1	1	1	0.89067	1.1164	0.0478198	NaN	1	14.1	1	1	0.71948	1.0484	0.020527	NaN	1
	1064	Tb927.11.5920	Tb927.11.5920		hypothetical protein, conserved	80.414	30.2	0	148.44	1	1	1.05376	0.0227397	0.0891066	1.05009		28.7	15	15	1.09955	1.00133	0.000578095	18.992	17	23.8	12	12	0.86555	1.0863	0.0359498	9.6517	13	15.2	7	7	0.73731	1.0757	0.0316912	6.0988	9
	562	Tb927.10.4830	Tb927.10.4830		hypothetical protein, conserved	22.137	13.4	0	15.187	1		1.15369	0.0620895	0.0899139	1.04617		13.4	2	2	1.42786	1.31782	0.119855	20.431	2	13.4	2	2	0.9021	1.1242	0.0508436	20.897	3	13.4	2	2	0.7116	1.0365	0.0155693	12.463	2
	1456	Tb927.4.2450	Tb927.4.2450		thioredoxin, putative	44.49	41.6	0	133.04	1		1.1047	0.0432427	0.0922065	1.03524		39.7	10	10	1.12065	1.03297	0.0140885	13.438	12	29.4	8	8	0.85355	1.0715	0.0299922	16.082	11	38	9	9	0.842	1.218	0.0856473	11.222	11
	689	Tb927.10.9440	Tb927.10.9440	54 NDH2	NADH dehydrogenase (54 NDH2)	54.351	28.1	0	53.762	1		1.04473	0.0190035	0.0924173	1.03425		18.9	6	6	1.09747	1.0065	0.00281464	11.605	7	26.5	7	7	0.8695	1.0861	0.0358698	9.8884	7	17.3	5	5	0.72703	1.0431	0.0183259	5.9388	5
	1002	Tb927.11.4020	Tb927.11.4020		hypothetical protein, conserved	19.159	19	0	21.605	1	1	1.07224	0.0302906	0.0925457	1.03364		19	4	4	1.10704	1.01699	0.00731839	7.5872	4	19	4	4	0.8419	1.0579	0.0244446	27.832	4	14.1	3	3	0.78851	1.1458	0.0591088	24.516	4
	113	Tb927.11.7214;Tb11.02.5100b	Tb927.11.7214;Tb11.02.5100b		hypothetical protein, conserved;hypothetical protein, conserved	63.574	7.2	0	7.5454	2	1	1.09338	0.038771	0.0936045	1.0287		5.8	3	3	1.13162	1.03876	0.0165135	10.047	5	3.6	2	2	0.84072	1.0516	0.0218506	1.1845	4	4.9	3	3	0.82439	1.1966	0.077949	14.964	2
	1359	Tb927.3.4120	Tb927.3.4120		hypothetical protein, conserved	73.301	21.7	0	88.214	1		1.15955	0.0642877	0.0936139	1.02866		18	7	7	1.09577	1.01304	0.00562574	10.843	7	17.1	6	6	1.0514	1.3128	0.118199	24.767	6	12.7	5	5	0.81278	1.1723	0.0690388	11.183	5
	2196	Tb927.8.860	Tb927.8.860		hypothetical protein, conserved	25.908	10.3	0	8.01	1		1.16874	0.0677177	0.09576	1.01882		10.3	2	2	1.23259	1.12315	0.0504393	24.605	4	10.3	2	2	1.0498	1.3641	0.134846	15.856	3	6.2	1	1	0.68298	1.042	0.0178677	NaN	1
	810	Tb927.11.1350	Tb927.11.1350	MCU	calcium uniporter protein, mitochondrial	34.885	7.2	0	4.6007	1		1.17763	0.0710072	0.0966681	1.01472		3.9	1	1	1.116	1.01451	0.00625505	NaN	1	3.3	1	1	0.95809	1.1834	0.0731316	NaN	1	3.3	1	1	0.93634	1.3603	0.133635	NaN	1
	1873	Tb927.7.3340	Tb927.7.3340		hypothetical protein, conserved	58.619	6.3	0	5.718	1	1	1.23037	0.0900347	0.0969116	1.01362		4.3	2	2	1.14394	1.01749	0.00753058	5.0214	2	2.2	1	1	1.1693	1.4767	0.169292	NaN	1	4.1	2	2	0.83571	1.2396	0.0932816	25.843	2
	1395	Tb927.3.5590	Tb927.3.5590		hypothetical protein, conserved	77.227	15.7	0	62.918	1	1	1.05981	0.025227	0.0970702	1.01291		9.4	5	5	1.08836	1.0002	8.68502e-05	10.254	6	14.4	8	8	0.85799	1.0749	0.0313681	16.521	8	9.6	6	6	0.75903	1.1072	0.0442261	8.907	3
	2290	Tb927.9.14420	Tb927.9.14420	PPIase	cyclophilin-like protein, putative (PPIase)	42.65	8.6	0	15.457	1	1	1.11011	0.0453668	0.0971103	1.01273		8.6	3	3	1.27044	1.16433	0.0660776	16.387	3	8.3	2	2	0.94108	1.1795	0.0716979	51.304	3	8.6	3	3	0.67973	0.99615	-0.00167526	19.174	3
	1213	Tb927.2.340	Tb927.2.340		retrotransposon hot spot protein 4 (RHS4), putative	97.84	12.5	0	4.7916	1		1.25008	0.0969374	0.0971429	1.01259		11.5	10	3	1.07715	0.99167	-0.00363282	14.398	3	10.7	9	3	1.0985	1.3855	0.141607	15.624	3	5.8	5	2	0.98556	1.4218	0.152839	49.643	2
	264	Tb927.1.3450;Tb11.v5.0619	Tb927.1.3450;Tb11.v5.0619		hypothetical protein, conserved;hypothetical protein, conserved	84.883	11.4	0	26.439	2		1.1721	0.0689654	0.0975625	1.01072		6.7	3	3	1.11748	1.00476	0.00206363	8.6801	2	11.4	6	6	1.0518	1.3343	0.125253	16.647	7	7.2	4	4	0.8364	1.2011	0.0795792	16.206	5
	1451	Tb927.4.2300	Tb927.4.2300		hypothetical protein, conserved	80.56	29.6	0	103.15	1		1.06526	0.027454	0.0979111	1.00917		26.9	15	15	1.23684	1.12505	0.0511714	20.543	14	22.9	12	12	0.80573	1.0037	0.00160392	9.7845	14	20.7	10	10	0.74117	1.0705	0.0295867	14.184	11
	2029	Tb927.8.1990	Tb927.8.1990	TRYP2	peroxidoxin (TRYP2)	25.631	33.6	0	40.6	1	1	1.02407	0.010328	0.0986599	1.00586		30.5	8	8	1.13468	1.04988	0.0211397	5.0589	13	30.5	8	8	0.81346	1.0133	0.00573804	2.1387	13	33.6	8	8	0.69703	1.0095	0.00410632	6.2832	11
	1417	Tb927.4.1080	Tb927.4.1080		V-type ATPase, A subunit, putative	67.749	5.1	0.0023408	3.1389	1		1.40501	0.147678	0.0989699	1.0045		3	2	2	1.24562	1.13559	0.0552212	21.502	2	2.1	1	1	0.93943	1.2179	0.0856116	NaN	1	1.8	1	1	1.3745	2.0054	0.302201	NaN	1
	572	Tb927.10.520	Tb927.10.520		hypothetical protein, conserved	46.781	19.2	0	61.985	1	1	1.05392	0.0228078	0.0990523	1.00414		17.4	8	8	1.12627	1.0328	0.0140171	12.161	10	16.4	7	7	0.87777	1.1132	0.0465732	7.3357	8	19.2	9	9	0.70561	1.0182	0.00783309	8.8292	11
	971	Tb927.11.3060	Tb927.11.3060		hypothetical protein, conserved	21.018	12.8	0	38.075	1		2.17287	0.337034	0.099543	1.00199		12.8	2	2	1.86293	1.69067	0.22806	25.434	2	5	1	1	2.2405	2.7926	0.446009	NaN	1	0	0	0	NaN	NaN		NaN	0
	2429	Tb927.9.9150	Tb927.9.9150		GTP-binding protein, putative	50.353	20.2	0	39.117	1	1	1.05751	0.0242847	0.100346	0.998498		20.2	7	7	1.16527	1.05824	0.0245821	10.854	7	20.2	7	7	0.80316	1.0041	0.00177697	35.884	6	4.7	2	2	0.74884	1.113	0.0464952	21.593	2
	1510	Tb927.4.4600	Tb927.4.4600		hypothetical protein, conserved	31.248	26.5	0	21.316	1	1	1.05934	0.0250346	0.100372	0.998389		26.5	5	5	1.16216	1.04981	0.0211124	10.46	4	12.3	2	2	0.8029	1.0097	0.00419236	28	2	18.1	3	3	0.78146	1.1215	0.0497993	25.331	3
	1665	Tb927.6.1560	Tb927.6.1560		hypothetical protein, conserved	65.925	9.6	0	24.001	1		1.13902	0.0565331	0.100832	0.996401		9.6	4	4	1.16412	1.06365	0.0267983	41.013	2	2.4	1	1	1.0357	1.3087	0.11684	NaN	1	4.8	2	2	0.72426	1.0616	0.0259609	46.892	2
	826	Tb927.11.13910	Tb927.11.13910		hypothetical protein, conserved	28.921	28.3	0	22.493	1	1	1.09495	0.0393932	0.101804	0.992235		20.4	4	4	1.10223	1.01178	0.0050848	30.478	4	15.5	4	4	0.95992	1.1967	0.0779853	66.864	4	13.6	3	3	0.75387	1.0842	0.0351094	22.161	4
	1737	Tb927.6.4030	Tb927.6.4030		superoxide dismutase, putative	29.652	24.3	0	8.549	1	1	1.15549	0.0627643	0.101866	0.991969		15.2	3	3	1.09111	0.990786	-0.00402027	2.7869	2	4.6	1	1	0.98288	1.2248	0.0880652	NaN	1	10.3	2	2	0.87779	1.2713	0.104248	4.2909	2
	2339	Tb927.9.3670	Tb927.9.3670		hypothetical protein, conserved	59.886	5.3	0.0014272	3.3446	1	1	1.31403	0.118604	0.102205	0.990527		5.3	2	2	1.66072	1.52625	0.183626	NaN	1	2.3	1	1	0.91197	0.97923	-0.00911529	NaN	1	2.3	1	1	1.0565	1.5181	0.1813	NaN	1
	1684	Tb927.6.2170	Tb927.6.2170		co-chaperone GrpE, putative	23.877	37.8	0	24.369	1	1	1.00873	0.00377385	0.102254	0.990321		32.9	7	7	1.09676	1.00625	0.00270546	8.0503	8	32.9	7	7	0.80272	1.0021	0.000911062	4.0403	9	21.2	4	4	0.71	1.0179	0.00770511	4.8372	4
	615	Tb927.10.6870	Tb927.10.6870		short-chain dehydrogenase, putative	40.178	11	0	6.3935	1		1.22941	0.089698	0.102718	0.988354		3.8	1	1	1.23756	1.11082	0.0456417	NaN	1	3.8	1	1	0.86029	1.0888	0.0369481	NaN	1	11	3	3	1.0637	1.5364	0.186504	0.65974	3
	1309	Tb927.3.2330	Tb927.3.2330	kkt17	hypothetical protein, conserved	67.492	11	0	17.293	1		1.07137	0.029938	0.102888	0.987636		7.6	4	4	1.25698	1.15091	0.0610402	23.704	4	9.2	4	4	0.84483	1.0525	0.0222221	12.998	3	6.8	3	3	0.70098	1.0152	0.00655161	10.084	2
	2047	Tb927.8.2740	Tb927.8.2740	TbRBP38	mitochondrial RNA binding protein (TbRBP38)	38.497	24.3	0	40.355	1	1	1.09696	0.0401896	0.103133	0.9866		16.6	5	5	1.30628	1.20058	0.0793915	19.401	6	18.9	4	4	0.7811	1.0096	0.00414934	11.029	4	11.2	3	3	0.74347	1.089	0.0370279	13.548	4
	1350	Tb927.3.3820	Tb927.3.3820		hypothetical protein, conserved	45.231	10.6	0	4.4928	1		1.13433	0.0547412	0.103173	0.986432		4.2	2	2	1.29216	1.1834	0.073133	47.369	2	0	0	0	NaN	NaN		NaN	0	8.4	2	2	0.75666	1.0873	0.0363494	28.073	2
	2285	Tb927.9.14200	Tb927.9.14200		hypothetical protein, conserved	44.532	20.7	0	50.161	1	1	1.02506	0.0107492	0.103527	0.984946		17.4	5	5	1.13812	1.01344	0.00579718	7.8812	7	15.3	4	4	0.81011	1.0529	0.0223871	4.6827	5	16.1	5	5	0.70026	1.0094	0.0040633	14.37	4
	462	Tb927.10.1660	Tb927.10.1660		hypothetical protein, conserved	33.212	12.5	0	7.1863	1	1	1.44527	0.159948	0.104407	0.981269		9.2	3	3	1.09259	0.966277	-0.0148984	20.963	3	9.2	3	3	1.3872	1.7634	0.246351	31.397	2	3.4	1	1	1.2204	1.7717	0.24839	NaN	1
	2428	Tb927.9.9080	Tb927.9.9080		hypothetical protein, conserved	28.704	10.3	0	23.08	1	1	1.05952	0.0251089	0.104973	0.978923		5.1	1	1	1.10073	1.00256	0.00110907	NaN	1	10.3	2	2	0.89363	1.119	0.0488301	4.409	2	10.3	2	2	0.73136	1.0602	0.0253878	11.283	2
	1736	Tb927.6.4000	Tb927.6.4000	SGT	small glutamine-rich tetratricopeptide repeat protein, putative (SGT)	45.966	29.3	0	113.5	1		1.09521	0.0394977	0.105336	0.977425		20.2	6	6	1.27447	1.15027	0.0608002	21.176	6	19.5	6	6	0.79287	0.99095	-0.00394826	63.96	5	24.5	7	7	0.79277	1.1525	0.0616409	21.502	9
	843	Tb927.11.14520	Tb927.11.14520		Polypeptide deformylase 1	29.64	22.3	0	20.878	1	1	1.03287	0.0140468	0.106085	0.974345		15	2	2	1.0978	0.997904	-0.000911062	15.916	3	19.2	3	3	0.83854	1.0596	0.0251419	9.0977	5	22.3	4	4	0.71879	1.0421	0.0179094	7.3551	6
	1877	Tb927.7.3460	Tb927.7.3460		hypothetical protein, conserved	50.252	22	0	40.004	1	1	1.12187	0.0499415	0.106141	0.974119		16.5	6	6	1.09201	0.988142	-0.00518051	6.0997	7	11.6	5	5	0.94662	1.187	0.0744507	18.194	5	15.1	5	5	0.82812	1.2038	0.0805543	20.278	5
	1834	Tb927.7.2200	Tb927.7.2200	Tim 9	hypothetical protein, conserved	8.8073	26.9	0	5.6579	1	1	1.85576	0.268522	0.107489	0.968635		26.9	2	2	2.5047	2.30574	0.362811	62.779	2	12.8	1	1	1.1915	1.4936	0.174234	NaN	1	0	0	0	NaN	NaN		NaN	0
	2321	Tb927.9.2670	Tb927.9.2670		engulfment and cell motility domain 2, putative	41.157	4.1	0.0035367	2.4425	1		1.17271	0.0691921	0.107505	0.968572		0	0	0	NaN	NaN		NaN	0	4.1	1	1	0.90456	1.1089	0.0448924	NaN	1	4.1	1	1	0.8478	1.2402	0.0934917	NaN	1
	855	Tb927.11.14910	Tb927.11.14910		protein phosphatase 2C, putative	47.124	17.5	0	19.983	1		1.51667	0.18089	0.107591	0.968222		14.9	4	4	1.05852	0.958497	-0.0184092	25.438	4	13.3	3	3	1.5749	2.0374	0.309076	17.625	3	10.7	2	2	1.2285	1.7865	0.252003	14.382	2
	703	Tb927.10.9960	Tb927.10.9960		hypothetical protein, conserved	50.168	29.6	0	79.948	1	1	1.00755	0.00326618	0.108034	0.966438		25.3	10	10	1.08871	0.999201	-0.000347314	9.7367	11	25.7	9	9	0.80936	1.0129	0.00556657	11.951	11	29.6	11	11	0.70171	1.0106	0.00457929	17.849	12
	1405	Tb927.3.790	Tb927.3.790	ZC3H6	ZFP family member, putative (ZC3H6)	38.651	13.8	0	9.6106	1		1.05145	0.0217897	0.108179	0.965855		13.8	3	3	1.18864	1.08306	0.0346525	11.613	3	9	2	2	0.80033	0.99397	-0.00262672	30.44	2	3.7	1	1	0.7615	1.0798	0.0333433	NaN	1
	122	Tb11.1420;Tb11.1370;Tb927.11.1850	Tb11.1420;Tb11.1370;Tb927.11.1850		hypothetical protein,chrXI additional, unordered contigs;hypothetical protein, conserved;hypothetical protein, conserved	50.917	20.5	0	22.764	3	1	1.06092	0.0256844	0.108911	0.962929		13.9	5	5	1.24872	1.13354	0.054438	16.215	6	20.5	7	7	0.79466	1.0198	0.00851501	16.856	9	11.1	4	4	0.71561	1.033	0.0141003	25.933	5
	1133	Tb927.11.8700	Tb927.11.8700		hypothetical protein, conserved	65.26	6.4	0	7.4708	1	1	1.14015	0.0569613	0.108936	0.962829		2.6	1	1	1.27392	1.19469	0.0772538	NaN	1	0	0	0	NaN	NaN		NaN	0	3.8	1	1	0.75576	1.0881	0.0366688	NaN	1
	1724	Tb927.6.3650	Tb927.6.3650		ADP-ribosylation factor, putative	20.072	16.4	0	11.319	1		1.03058	0.0130819	0.110592	0.956275		9.3	1	1	1.13871	1.04188	0.0178194	NaN	1	0	0	0	NaN	NaN		NaN	0	16.4	2	2	0.71027	1.0194	0.00834463	30.835	2
	913	Tb927.11.16740	Tb927.11.16740		chaperone protein DNAj, putative	42.846	13.3	0	10.786	1		1.09121	0.0379076	0.11102	0.954598		9.9	3	3	1.13664	1.05712	0.0241226	36.461	4	10.2	3	3	0.89219	1.1264	0.0516926	31.584	3	0	0	0	NaN	NaN		NaN	0
	978	Tb927.11.3300	Tb927.11.3300		hypothetical protein, conserved	107.86	5.3	0	6.8356	1		1.71638	0.234613	0.111155	0.954071		0.8	1	1	1.76957	1.63257	0.212873	NaN	1	2.5	2	2	0.88766	1.0327	0.0139742	5.0563	2	4.5	3	3	2.0805	2.9991	0.476991	67.877	2
	644	Tb927.10.7700	Tb927.10.7700		ABC transporter, putative	75.051	14.4	0	23.885	1		1.07516	0.0314712	0.111286	0.953559		13	6	6	1.24234	1.13491	0.0549599	8.5326	6	6.3	3	3	0.88493	1.105	0.0433623	24.278	3	10.3	5	5	0.68025	0.99104	-0.00390882	23.062	4
	674	Tb927.10.8940	Tb927.10.8940	KH1	hypothetical protein, conserved	45.398	42.3	0	110.91	1		1.04455	0.0189293	0.111441	0.952954		41.8	11	11	1.13941	1.01992	0.00856568	30.736	13	41.6	10	10	0.81084	1.0177	0.00761977	30.62	14	28	8	8	0.7584	1.098	0.0406023	36.545	10
	293	Tb927.10.10000	Tb927.10.10000		hypothetical protein, conserved	44.084	13	0	11.175	1		1.45234	0.162068	0.112646	0.948284		13	5	5	1.82382	1.66703	0.221943	34.146	4	4.9	2	2	1.0024	1.2653	0.102194	29.214	2	0	0	0	NaN	NaN		NaN	0
	506	Tb927.10.2900;Tb11.v5.0837	Tb927.10.2900;Tb11.v5.0837		importin beta-1 subunit, putative;importin beta-1 subunit, putative	95.068	11.3	0	54.927	2		1.0575	0.0242807	0.113332	0.945649		10.3	6	6	1.16773	1.07267	0.0304678	18.938	6	8.5	5	5	0.78688	0.99404	-0.00259614	36.911	5	5.1	3	3	0.77257	1.1091	0.0449707	43.9	3
	1539	Tb927.5.1020	Tb927.5.1020		disulfide isomerase, putative	65.721	4.8	0	5.767	1		2.84038	0.453377	0.113889	0.943519		0	0	0	NaN	NaN		NaN	0	3.6	2	2	1.5365	1.9225	0.283866	36.377	2	1.2	1	1	2.8721	4.1965	0.622887	NaN	1
	1603	Tb927.5.3340	Tb927.5.3340	TbTim11	hypothetical protein, conserved	11.094	12.6	0.00096899	3.7256	1	1	1.53002	0.184697	0.114288	0.942		0	0	0	NaN	NaN		NaN	0	12.6	1	1	1.039	1.3043	0.115377	10.92	2	12.6	1	1	1.2439	1.7948	0.254016	NaN	1
	1644	Tb927.5.770	Tb927.5.770		hypothetical protein, conserved	76.378	13.2	0	140.11	1	1	1.05066	0.021462	0.114756	0.940223		13.2	5	5	1.09647	0.997208	-0.00121433	17.72	5	11.3	4	4	0.87863	1.1019	0.0421422	12.296	4	5.5	2	2	0.72445	1.0555	0.0234582	26.974	2
	1983	Tb927.7.7340	Tb927.7.7340		hypothetical protein, conserved	47.546	13.8	0	18.842	1		1.29501	0.112273	0.114882	0.939746		5.4	2	2	1.2347	1.12652	0.0517385	1.2988	2	4.9	2	2	0.87409	1.1002	0.0414716	0.7322	2	6.2	1	1	1.2149	1.7523	0.243608	NaN	1
	190	Tb11.v5.0589;Tb927.3.1110	Tb11.v5.0589;Tb927.3.1110	PIFTA1	hypothetical protein, conserved;flagellar transport protein, putative (PIFTA1)	49.399	5.9	0	11.293	2		1.04179	0.0177787	0.114968	0.939422		5.9	1	1	1.13138	1.05802	0.0244947	NaN	1	5.9	1	1	0.8317	1.0258	0.0110627	NaN	1	0	0	0	NaN	NaN		NaN	0
	1237	Tb927.2.470;Tb11.v5.0800;Tb927.2.1100;Tb11.0820;Tb927.1.70	Tb927.2.470		retrotransposon hot spot protein 4 (RHS4), putative	98.316	13.6	0	18.408	5		1.1232	0.0504567	0.115043	0.939138		8.8	8	2	1.39671	1.28669	0.109473	NaN	1	9.4	8	1	0.84107	1.0576	0.0243214	NaN	1	7	6	1	0.72534	1.0413	0.0175759	NaN	1
	862	Tb927.11.15070	Tb927.11.15070		hypothetical protein, conserved	119.15	10.7	0	28.267	1	1	1.19951	0.0790023	0.115684	0.936727		8.3	6	6	1.43152	1.28808	0.109942	23.726	8	7.7	6	6	0.76701	0.97184	-0.0124052	39.68	5	4.5	4	4	0.94958	1.3787	0.13947	95.068	4
	1194	Tb927.2.2210	Tb927.2.2210		hypothetical protein, conserved	113.45	8.7	0	34.851	1	1	1.06602	0.027766	0.115881	0.93599		8.7	5	5	1.24329	1.1278	0.0522332	26.569	6	5.7	3	3	0.79104	0.99247	-0.00328261	22.662	4	5.7	3	3	0.75793	1.0823	0.0343477	28.268	3
	338	Tb927.10.11520	Tb927.10.11520	TbTim13	hypothetical protein, conserved	13.421	20.5	0	8.1178	1	1	1.52388	0.182952	0.116795	0.932575		0	0	0	NaN	NaN		NaN	0	20.5	2	2	1.0278	1.2961	0.112639	19.772	2	10.3	1	1	1.2298	1.7917	0.253265	NaN	1
	2015	Tb927.8.1680	Tb927.8.1680	kkt12	hypothetical protein, conserved	23.036	13	0	6.3707	1		1.05434	0.0229814	0.116924	0.932098		13	3	3	1.20114	1.09957	0.0412213	11.916	3	13	3	3	0.85837	1.075	0.0314085	19.638	4	6	2	2	0.68589	0.99155	-0.00368538	3.9594	2
	1664	Tb927.6.1550	Tb927.6.1550		leucine-rich repeat protein (LRRP), putative	38.864	17	0	58.516	1		1.02783	0.0119226	0.117663	0.929359		17	4	4	1.12272	1.02572	0.0110309	8.264	5	17	4	4	0.79566	1.0002	8.68502e-05	8.1742	4	12.2	2	2	0.73512	1.0584	0.0246498	7.234	3
	2210	Tb927.9.10560	Tb927.9.10560		hypothetical protein, conserved	19.035	13.1	0	68.544	1	1	1.0526	0.0222618	0.119069	0.924201		13.1	1	1	1.07792	0.991867	-0.00354673	NaN	1	13.1	1	1	0.87638	1.0998	0.0413137	NaN	1	13.1	1	1	0.74299	1.0691	0.0290183	NaN	1
	469	Tb927.10.1930	Tb927.10.1930		hypothetical protein, conserved	74.392	5.4	0	4.7197	1	1	1.08817	0.0366974	0.119151	0.923902		4	2	2	1.13121	1.05264	0.0222811	5.3433	2	3.4	2	2	0.89527	1.1249	0.0511139	2.2943	2	0	0	0	NaN	NaN		NaN	0
	1936	Tb927.7.5560	Tb927.7.5560		glucosamine-fructose-6-phosphate aminotransferase, putative	71.523	8.3	0	34.723	1		1.04636	0.0196804	0.119451	0.922811		6.2	3	3	1.14271	1.04345	0.0184712	13.429	3	8.3	4	4	0.80207	0.99947	-0.000230237	19.97	3	6.7	3	3	0.7504	1.0985	0.0408001	17.139	4
	1804	Tb927.7.1240	Tb927.7.1240		sphingosine kinase A, B, putative	83.577	10.8	0	55.248	1		1.09414	0.0390747	0.119632	0.922152		7.2	5	5	1.08156	0.98174	-0.00800369	10.572	5	10.8	7	7	0.93019	1.1492	0.0603956	9.4096	6	8.2	5	5	0.80069	1.161	0.0648322	24.703	6
	1697	Tb927.6.2490	Tb927.6.2490		hypothetical protein, conserved	28.031	15.4	0	14.391	1	1	1.09707	0.0402346	0.119747	0.921735		4.6	1	1	1.16726	1.06874	0.0288725	8.6715	2	15.4	3	3	0.81167	1.0116	0.00500882	7.7689	3	12.1	2	2	0.84183	1.2213	0.0868224	9.8017	2
	142	Tb927.5.440;Tb11.v5.0223	Tb927.5.440;Tb11.v5.0223		trans-sialidase, putative;hypothetical protein, conserved	84.562	9.4	0	23.175	2	1	1.07137	0.0299383	0.120034	0.920697		8.3	5	5	1.28352	1.16266	0.0654512	3.3579	5	8.3	5	5	0.8233	1.0431	0.0183259	21.445	5	2.6	2	2	0.68205	1.014	0.00603795	17.986	2
	866	Tb927.11.15270	Tb927.11.15270		hypothetical protein, conserved	28.843	44.4	0	47.259	1		1.02632	0.0112825	0.12042	0.919302		35.1	6	6	1.07697	0.995619	-0.00190674	26.837	6	44.4	7	7	0.83714	1.0496	0.0210238	24.841	8	41.4	6	6	0.71382	1.0345	0.0147305	14.962	6
	1476	Tb927.4.3480	Tb927.4.3480		hypothetical protein	19.994	13.1	0	24.817	1		1.1734	0.0694455	0.12124	0.916354		13.1	2	2	1.0584	0.966557	-0.0147725	1.8058	2	13.1	2	2	1.0099	1.2714	0.104282	7.5164	2	13.1	2	2	0.91127	1.3147	0.118827	9.5616	2
	2194	Tb927.8.8300	Tb927.8.8300		amino acid transporter, putative	50.17	9.8	0	26.345	1	1	1.05919	0.0249751	0.121248	0.916327		9.8	3	3	1.07489	0.992162	-0.00341745	12.69	3	5.9	2	2	0.85242	1.0707	0.0296678	7.672	2	3.6	1	1	0.77708	1.1186	0.0486748	NaN	1
	865	Tb927.11.15240	Tb927.11.15240	RAB2	small GTPase, putative,ras-related protein rab-2a, putative (RAB2)	23.511	16.5	0	11.798	1		1.12103	0.0496186	0.122613	0.911463		10.4	2	2	1.40341	1.28021	0.107282	NaN	1	11.3	2	2	0.80677	1.0083	0.00358977	NaN	1	6.1	1	1	0.75209	1.0914	0.0379839	NaN	1
	1275	Tb927.3.1450;Tb927.3.1530	Tb927.3.1450;Tb927.3.1530		hypothetical protein, conserved;hypothetical protein, conserved	43.307	19.4	0	39.974	2		1.03749	0.0159859	0.123421	0.908612		19.4	5	5	1.11739	1.01611	0.00693859	11.092	8	19.4	5	5	0.86787	1.0857	0.0357098	5.0092	6	12.5	3	3	0.70556	1.0123	0.00530924	10.549	4
	481	Tb927.10.2250	Tb927.10.2250		ubiquitin-conjugating enzyme variant Kua homologue, putative	33.781	5	0.0047889	2.2882	1		4.32813	0.6363	0.123433	0.90857		5	1	1	2.71437	2.37903	0.376399	NaN	1	0	0	0	NaN	NaN		NaN	0	5	1	1	5.3577	7.8741	0.896201	NaN	1
	2176	Tb927.8.7600;Tb927.8.7670;Tb927.8.7650;Tb927.8.7640;Tb927.8.7630;Tb927.8.7620;Tb927.8.7610	Tb927.8.7600;Tb927.8.7670;Tb927.8.7650;Tb927.8.7640;Tb927.8.7630;Tb927.8.7620;Tb927.8.7610	AATP1;AATP1;AATP1;AATP1	amino acid transporter, putative;amino acid transporter, putative;amino acid transporter, putative;amino acid transporter 1, putative (AATP1);amino acid transporter 1, putative (AATP1);amino acid transporter 1, putative (AATP1);amino acid transporter	58.179	6.9	0	33.643	7		1.12406	0.0507878	0.123729	0.90753		6.9	4	3	1.18439	1.07149	0.0299881	40.591	3	1.7	1	0	NaN	NaN		NaN	0	2.6	1	1	0.80899	1.1792	0.0715875	NaN	1
	315	Tb927.10.10840;Tb11.v5.0423	Tb927.10.10840		hypothetical protein, conserved	60.057	7.2	0	5.0542	2		1.58455	0.199907	0.123779	0.907354		2.8	1	1	2.05982	1.91344	0.281814	NaN	1	2.5	1	1	NaN	NaN		NaN	0	4.4	2	2	0.8997	1.3122	0.118	NaN	1
	1541	Tb927.5.1060	Tb927.5.1060		mitochondrial processing peptidase, beta subunit, putative,metallo-peptidase, Clan ME, Family M16	54.122	52.6	0	323.31	1	1	1.01607	0.00692195	0.12446	0.904972		52.6	17	17	1.1291	1.0364	0.0155266	6.0494	24	50.1	16	16	0.8016	1.0061	0.00264115	5.1854	24	43.8	13	13	0.6925	1.006	0.00259798	5.6295	21
	611	Tb927.10.6810	Tb927.10.6810		guanylate kinase, putative	29.956	53.4	0	137.36	1		1.03302	0.0141105	0.124582	0.904546		50	10	10	1.08165	0.994233	-0.00251165	10.684	13	53.4	11	11	0.82901	1.0412	0.0175342	15.556	14	42	8	8	0.73713	1.0649	0.0273088	10.865	11
	1561	Tb927.5.1710	Tb927.5.1710		ribonucleoprotein p18, mitochondrial precursor, putative	21.226	29.3	0	147.28	1	1	1.03933	0.0167536	0.12461	0.904446		27.1	5	5	1.11477	1.03119	0.0133404	10.712	10	27.1	5	5	0.80486	1.0015	0.000650954	4.9749	11	29.3	6	6	0.74644	1.0871	0.0362695	12.697	11
	682	Tb927.10.9200	Tb927.10.9200		hypothetical protein, conserved	48.021	4.6	0	6.352	1		2.04351	0.310377	0.12533	0.901945		4.6	1	1	1.64867	1.51858	0.181438	22.28	2	4.6	1	1	2.2309	2.7499	0.439317	NaN	1	0	0	0	NaN	NaN		NaN	0
	1971	Tb927.7.6930	Tb927.7.6930		ATPase, putative	55.82	30.4	0	91.774	1	1	1.03018	0.0129135	0.125719	0.900598		28	11	11	1.09949	1.00552	0.00239071	8.7069	13	27.8	11	11	0.81314	1.0175	0.00753442	15.099	11	19	7	7	0.73093	1.0686	0.0288152	7.2576	7
	1982	Tb927.7.7330	Tb927.7.7330		hypothetical protein, conserved	47.401	24	0	69.169	1	1	1.03029	0.0129613	0.125771	0.900421		24	9	9	1.13257	1.0339	0.0144794	10.243	9	15.3	6	6	0.84667	1.0622	0.0262063	11.84	6	13.8	5	5	0.69631	0.99586	-0.00180171	11.05	5
	1575	Tb927.5.2080	Tb927.5.2080		guanosine monophosphate reductase, putative	52.238	43.6	0	211.86	1		1.0132	0.00569561	0.127565	0.894268		43.6	16	16	1.08762	0.996512	-0.00151738	15.287	23	40.9	14	14	0.81416	1.022	0.0094509	12.375	18	31.6	9	9	0.70889	1.0213	0.00915333	10.983	13
	756	Tb927.11.11460	Tb927.11.11460	ATOM69	hypothetical protein, conserved	68.998	46.4	0	323.31	1	1	1.0215	0.00923994	0.128076	0.892533		45.1	25	25	1.12525	1.02438	0.0104611	16.397	27	42.1	22	22	0.81788	1.0441	0.0187421	16.794	28	40.4	22	22	0.69	0.99659	-0.00148347	12.461	24
	589	Tb927.10.5900	Tb927.10.5900		hypothetical protein, conserved	51.739	12.4	0	16.597	1	1	1.09021	0.0375089	0.128218	0.89205		9.9	3	3	1.10286	1.00912	0.00394367	9.8596	3	9.6	3	3	0.83921	1.0591	0.024937	20.007	3	7.1	2	2	0.83428	1.2124	0.0836459	20.488	2
	1320	Tb927.3.2710	Tb927.3.2710		6-phosphofructo-2-kinase/fructose-2,6-bisphosphatase	110.79	4.3	0.0004878	3.7908	1		1.43278	0.156178	0.128961	0.889542		0	0	0	NaN	NaN		NaN	0	4.3	3	3	0.98085	1.228	0.0891984	7.036	2	2.1	1	1	1.145	1.6717	0.223158	NaN	1
	2247	Tb927.9.12700	Tb927.9.12700		phospholipase A1, putative	49.911	20.1	0	35.161	1		1.04977	0.0210925	0.131611	0.880706		20.1	8	8	1.0733	0.986096	-0.00608076	12.392	10	16.6	7	7	0.86097	1.0903	0.037546	12.571	8	17.9	7	7	0.74878	1.076	0.0318123	10.532	8
	1511	Tb927.4.4610	Tb927.4.4610		hypothetical protein, conserved	34.626	26.3	0	36.878	1		1.06217	0.0261939	0.132041	0.879292		12.9	3	3	1.09448	0.994728	-0.0022957	12.411	4	21.9	4	4	0.91067	1.1393	0.0566381	8.4162	4	21.9	4	4	0.71974	1.0574	0.0242393	18.477	4
	1537	Tb927.4.970	Tb927.4.970		hypothetical protein, conserved	20.057	11.2	0	14.695	1	1	1.18173	0.0725173	0.133193	0.875518		11.2	2	2	1.57886	1.44724	0.160541	48.27	2	7	1	1	0.90553	1.1467	0.0594498	NaN	1	7	1	1	0.68155	0.9944	-0.00243888	NaN	1
	1346	Tb927.3.3630	Tb927.3.3630	EF-Ts	elongation factor ts, putative (EF-TS)	29.732	33.2	0	92.255	1	1	1.09865	0.0408593	0.1337	0.873868		33.2	5	5	1.09343	1.00019	8.25081e-05	11.017	7	33.2	5	5	0.85946	1.074	0.0310043	20.989	5	25.2	3	3	0.85531	1.2345	0.0914911	14.455	5
	118	Tb11.0400;Tb927.11.7700;Tb11.0300	Tb11.0400;Tb927.11.7700;Tb11.0300	P27	P27 protein, putative (P27);hypothetical protein;hypothetical protein,chrXI additional, unordered contigs	27.701	39.8	0	43.676	3	1	1.05623	0.0237567	0.133807	0.873522		39.8	9	9	1.23808	1.13462	0.0548516	21.96	11	35.7	8	8	0.81253	1.0251	0.0107662	9.4176	9	39.8	8	8	0.70137	1.0131	0.00565232	6.6275	9
	597	Tb927.10.6170	Tb927.10.6170		hypothetical protein, conserved	163.96	8.8	0	28.94	1	1	1.09109	0.0378624	0.134609	0.870926		7.7	8	8	1.21395	1.10909	0.0449668	14.038	5	6.3	7	7	0.78106	0.98047	-0.00856569	19.196	3	3.6	4	4	0.84497	1.1945	0.0771862	20.531	4
	560	Tb927.10.4720	Tb927.10.4720		hypothetical protein, conserved	39.545	10.3	0	7.4038	1		1.04751	0.0201581	0.134917	0.869934		4.2	1	1	1.17412	1.06968	0.0292535	NaN	1	10.3	3	3	0.83837	1.0258	0.0110627	11.43	3	0	0	0	NaN	NaN		NaN	0
	1975	Tb927.7.7090	Tb927.7.7090		hypothetical protein, conserved	17.127	9.9	0	9.3503	1	1	1.07074	0.0296842	0.135184	0.869076		9.9	1	1	1.2691	1.16594	0.0666747	19.172	2	9.9	1	1	0.84767	1.0539	0.0227994	NaN	1	9.9	1	1	0.68783	0.99903	-0.00042147	5.5964	2
	148	Tb927.7.4550;Tb11.v5.0268	Tb927.7.4550;Tb11.v5.0268		60S ribosomal protein-like;60S ribosomal protein-like, putative	19.423	41	0	60.702	2	1	1.0364	0.0155277	0.136284	0.865557		40.4	5	5	1.17152	1.06928	0.029091	8.9557	5	41	6	6	0.83988	1.0527	0.0223046	13.989	6	29	3	3	0.67266	0.98898	-0.00481249	23.769	3
	705	Tb927.10.9980	Tb927.10.9980		hypothetical protein, conserved	36.971	11.7	0	28.966	1		1.33626	0.125893	0.137985	0.860169		7.6	1	1	1.3336	1.24556	0.0953657	NaN	1	11.4	2	2	0.79718	0.99235	-0.00333513	18.04	2	11.7	2	2	1.3268	1.9304	0.285647	70.673	2
	1893	Tb927.7.3960	Tb927.7.3960		50S ribosomal protein L16, putative	19.13	6	0.0067883	2.0941	1	1	1.23526	0.0917591	0.138138	0.859687		6	1	1	1.1895	1.07556	0.0316338	NaN	1	6	1	1	0.85301	1.067	0.0281644	NaN	1	6	1	1	1.1362	1.6424	0.215479	NaN	1
	1753	Tb927.6.4320	Tb927.6.4320		hypothetical protein, conserved	44.423	19	0	11.358	1		1.28038	0.107338	0.138437	0.858749		14	4	4	1.00692	0.928074	-0.0324173	17.406	4	8	3	3	1.1271	1.3924	0.143764	112.73	3	10.5	3	3	1.1143	1.6243	0.210666	2.0132	3
	1421	Tb927.4.1280	Tb927.4.1280		hypothetical protein, conserved	43.863	36.7	0	323.31	1	1	1.022	0.00944914	0.138645	0.858097		25.4	8	8	1.07699	0.993049	-0.00302945	67.857	13	32.2	9	9	0.82775	1.0425	0.0180761	5.092	13	36.7	11	11	0.7161	1.0311	0.0133008	7.8858	14
	2283	Tb927.9.14180	Tb927.9.14180		chaperone protein DNAj, putative	36.846	14.9	0	10.294	1		1.13651	0.0555731	0.138923	0.857227		12.4	3	3	1.23268	1.13769	0.0560258	42.343	4	4	1	1	0.78052	0.97758	-0.00984769	0	2	6.5	2	2	0.91337	1.3199	0.120541	41.799	2
	318	Tb927.10.11030	Tb927.10.11030	ATOM11	hypothetical protein, conserved	11.261	23	0	6.4418	1	1	1.18953	0.0753751	0.139426	0.855656		23	2	2	1.11445	1.02662	0.0114097	NaN	1	23	2	2	0.87143	1.0917	0.0381033	NaN	1	11	1	1	1.0405	1.5018	0.176612	NaN	1
	1698	Tb927.6.2510	Tb927.6.2510		hypothetical protein, conserved	16.92	26.7	0	53.785	1	1	1.06608	0.0277879	0.139646	0.854972		26.7	3	3	1.07224	0.977804	-0.00974823	12.209	5	18.5	2	2	0.87556	1.1033	0.0426936	11.275	3	13	1	1	0.77175	1.1231	0.0504184	18.217	2
	1242	Tb927.2.4830	Tb927.2.4830		TFIIF-stimulated CTD phosphatase, putative	38.807	17.9	0	9.5607	1	1	1.02961	0.0126719	0.140284	0.852992		17.9	5	5	1.1111	1.00246	0.00106532	1.8723	6	17.9	5	5	0.84656	1.0705	0.0295867	18.957	4	14.3	4	4	0.70063	1.0171	0.00736365	20.427	4
	1462	Tb927.4.2700	Tb927.4.2700		hydroxymethylglutaryl-CoA synthase, putative	47.272	21.1	0	41.698	1	1	1.03633	0.0154977	0.140768	0.851495		18.3	5	5	1.11602	1.01616	0.00696081	8.8587	5	9.5	3	3	0.80225	1.0068	0.00294321	5.4822	3	14.6	4	4	0.76239	1.0879	0.036589	15.925	4
	1181	Tb927.11.9870	Tb927.11.9870		hypothetical protein, conserved	44.629	5.2	0	10.436	1		1.1376	0.0559912	0.141934	0.847913		2.8	1	1	1.47048	1.33656	0.125988	NaN	1	2.8	1	1	0.91204	1.1198	0.0491405	NaN	1	2.5	1	1	0.6526	0.98366	-0.00715499	NaN	1
	1828	Tb927.7.210	Tb927.7.210		proline dehydrogenase	63.858	35.1	0	192.55	1	1	1.00986	0.00425908	0.142089	0.847438		33.8	15	15	1.11602	1.0236	0.010132	10.272	21	32.9	15	15	0.80017	1.0034	0.0014741	8.0635	18	22.7	9	9	0.69429	1.0027	0.00117101	7.5376	14
	2187	Tb927.8.8120	Tb927.8.8120		hypothetical protein, conserved	30.085	16.8	0	42.696	1		1.3566	0.132451	0.142411	0.846457		11.2	2	2	1.84952	1.68828	0.227444	66.283	2	11.2	2	2	0.70385	0.89009	-0.0505661	24.297	2	5.6	1	1	1.108	1.6614	0.220474	NaN	1
	1273	Tb927.3.1410	Tb927.3.1410	COXVII	cytochrome oxidase subunit VII (COXVII)	19.264	33.9	0	20.958	1	1	1.05855	0.0247098	0.142903	0.844958		33.9	5	5	1.12268	1.01724	0.00742428	7.9885	6	33.9	5	5	0.80793	1.018	0.00774778	22.698	6	27.3	3	3	0.78543	1.1454	0.0589572	9.7022	4
	172	Tb927.10.15650;Tb11.v5.0465	Tb927.10.15650;Tb11.v5.0465		tRNA pseudouridine synthase A-like protein;tRNA pseudouridine synthase A-like protein, putative	64.812	8.1	0	7.5053	2	1	1.18831	0.0749308	0.143265	0.84386		5.4	2	2	1.30591	1.21706	0.0853131	13.213	2	8.1	3	3	1.1516	1.4435	0.159417	31.858	3	5.4	2	2	0.65434	0.95513	-0.0199375	14.002	2
	171	Tb927.1.1560;Tb11.v5.0464;Tb927.11.8350	Tb927.1.1560;Tb11.v5.0464		vesicular-fusion protein nsf, putative,N-ethylmaleimide sensitive factor (NsF);vesicular-fusion protein nsf, putative	79.953	12.3	0	13.634	3		1.06428	0.0270544	0.143353	0.843594		8.8	5	5	1.15406	1.0228	0.00978987	1.3311	4	6.8	4	4	0.78145	1.0157	0.00676545	13.34	4	7.3	4	3	0.78302	1.1604	0.0646077	32.22	3
	1675	Tb927.6.1960	Tb927.6.1960		glycosyltransferase family 28 protein, putative	45.904	13.5	0	13.264	1		1.03174	0.0135691	0.145403	0.837426		10.6	4	4	1.09621	0.99691	-0.00134422	6.9377	3	7	3	3	0.84823	1.0748	0.0313277	5.565	3	8.9	3	3	0.70554	1.025	0.0107239	6.3201	3
	1722	Tb927.6.3630	Tb927.6.3630	SPL	sphingosine 1-phosphate lyase, putative (SPL)	59.525	29	0	72.943	1		1.03567	0.0152195	0.145517	0.837085		25.3	10	10	1.16925	1.06261	0.0263735	78.084	11	19.3	7	7	0.84644	1.0604	0.0254697	4.4429	10	21.4	7	7	0.68415	0.98586	-0.00618475	9.6513	8
	2418	Tb927.9.8410	Tb927.9.8410		chaperone protein DNAj, putative	35.594	49.7	0	134.55	1	1	1.04563	0.0193771	0.145569	0.836931		47.3	14	14	1.0779	0.991178	-0.00384813	17.36	16	38.6	11	11	0.82164	1.0438	0.0186173	6.9169	12	40.4	11	11	0.75553	1.105	0.0433623	8.2424	12
	164	Tb927.10.16170;Tb11.v5.0396	Tb927.10.16170;Tb11.v5.0396		potassium voltage-gated channel, putative;potassium voltage-gated channel, putative	34.606	18.2	0	41.859	2	1	1.05999	0.0253004	0.145701	0.836538		15.3	4	4	1.09201	0.993542	-0.00281377	30.887	3	12.7	3	3	0.84078	1.0481	0.0204027	41.605	3	15.6	4	4	0.79423	1.1437	0.0583121	10.157	4
	856	Tb927.11.14940	Tb927.11.14940		hypothetical protein, conserved	60.446	21.7	0	123.49	1		1.16758	0.0672864	0.146728	0.833487		13	5	5	1.05297	0.965437	-0.0152759	9.8956	5	16.1	6	6	0.92212	1.1677	0.0673313	60.282	6	13.5	4	4	0.97218	1.4119	0.149804	25.557	3
	1533	Tb927.4.840	Tb927.4.840		hypothetical protein, conserved	45.618	21.4	0	35.286	1	1	1.07484	0.0313436	0.147718	0.830567		15.3	5	5	1.28702	1.19018	0.0756123	21.216	5	19.2	6	6	0.80701	1.0333	0.0142264	25.612	7	15.8	5	5	0.69941	1.0097	0.00419236	8.443	5
	107	Tb927.10.4310;Tb10.v4.0045	Tb927.10.4310;Tb10.v4.0045	PHB2	prohibitin 2, putative (PHB2);prohibitin, putative,chrX additional, unordered contigs	32.215	66.1	0	249.25	2	1	1.02418	0.010378	0.148027	0.829658		57.3	13	13	1.0879	1.00315	0.00136588	4.8895	16	54.9	11	11	0.84667	1.0594	0.02506	13.179	14	44.7	8	8	0.70402	1.0109	0.0047082	7.7437	10
	1996	Tb927.7.990	Tb927.7.990		chaperone protein DNAj, putative	86.6	24.2	0	86.399	1		1.0259	0.0111065	0.148052	0.829584		20.1	12	12	1.07174	0.994036	-0.00259802	8.6571	14	19.2	11	11	0.8446	1.0589	0.0248549	18.072	13	19.5	12	12	0.70232	1.0258	0.0110627	18.417	14
	1239	Tb927.2.4890;Tb927.2.4740	Tb927.2.4890;Tb927.2.4740		ribosomal protein L11, putative;ribosomal protein L11, putative	40.186	11.1	0	6.5198	2	1	1.37449	0.138141	0.14833	0.828771		11.1	4	4	1.17106	1.06744	0.0283439	9.7199	4	2.6	1	1	1.7328	2.1635	0.335157	NaN	1	5.8	2	2	0.77266	1.1244	0.0509208	14.471	2
	136	Tb11.v5.0189;Tb927.7.5090	Tb11.v5.0189;Tb927.7.5090		hypothetical protein, conserved;hypothetical protein, conserved	79.132	6.6	0	9.6921	2		1.08596	0.0358121	0.149038	0.826702		2.4	1	1	NaN	NaN		NaN	0	2.4	1	1	0.90946	1.1322	0.0539232	1.9242	2	6.6	2	2	0.72156	1.0416	0.017701	NaN	1
	993	Tb927.11.3790	Tb927.11.3790		hypothetical protein, conserved	32.372	7.2	0	4.2132	1		1.12839	0.0524573	0.149724	0.82471		7.2	2	2	1.25467	1.12525	0.0512498	12.405	2	3.4	1	1	1.011	1.3137	0.118496	NaN	1	3.4	1	1	0.66011	0.97191	-0.0123739	12.264	2
	313	Tb927.10.10820	Tb927.10.10820		hypothetical protein, conserved	36.965	24.3	0	56.169	1		1.05155	0.0218279	0.149898	0.824205		21	5	5	1.13304	1.02498	0.010715	12.125	5	11.7	3	3	0.86975	1.0788	0.0329409	18.797	3	3.3	1	1	NaN	NaN		NaN	0
	1739	Tb927.6.4070	Tb927.6.4070		hypothetical protein, conserved	29.319	21.8	0	29.032	1	1	1.16046	0.0646315	0.150465	0.822566		21.8	4	4	1.17869	1.04349	0.0184895	64.367	8	21.8	4	4	0.81303	1.0406	0.0172838	19.673	4	13	2	2	0.99187	1.4392	0.158121	58.688	2
	2388	Tb927.9.6910	Tb927.9.6910		hypothetical protein, conserved	17.806	27.2	0	4.3904	1	1	1.1271	0.0519611	0.15058	0.822233		27.2	3	3	1.07769	0.987362	-0.00552368	60.517	3	18.5	2	2	0.87742	1.0932	0.0386996	NaN	1	13.6	1	1	0.91903	1.3265	0.122707	NaN	1
	743	Tb927.11.11080	Tb927.11.11080	TbNup149	Nucleoporin (TbNup149)	149.23	13.1	0	24.39	1		1.09729	0.0403203	0.150611	0.822142		4.7	2	2	1.1449	1.04635	0.0196782	0.73255	2	3.8	1	1	NaN	NaN		NaN	0	12.1	3	3	0.79302	1.1507	0.0609621	20.919	2
	1775	Tb927.6.5000	Tb927.6.5000		hypothetical protein, conserved	44.275	16.2	0	22.58	1		1.15171	0.0613414	0.151189	0.820479		11.4	3	3	1.5259	1.39396	0.144251	40.211	2	11.4	3	3	0.88755	1.1172	0.0481309	11.246	3	16.2	5	5	0.6817	0.98094	-0.00835756	8.2045	5
	2424	Tb927.9.8880;Tb927.9.8850	Tb927.9.8880;Tb927.9.8850		actin A;actin A	41.895	12.8	0	13.433	2		1.10411	0.0430133	0.151688	0.819049		12.8	4	4	1.10494	0.999101	-0.000390693	7.1966	4	9.8	3	3	1.008	1.2701	0.103838	31.126	4	6.4	2	2	0.7212	1.0607	0.0255926	8.9035	3
	668	Tb927.10.8630	Tb927.10.8630		hypothetical protein, conserved	27.968	48.2	0	78.645	1		1.02302	0.0098851	0.151691	0.819041		48.2	9	9	1.09035	1.00672	0.00290654	5.7756	9	48.2	9	9	0.84096	1.0575	0.0242804	8.0475	9	36.9	6	6	0.69889	1.0057	0.00246845	5.714	7
	1335	Tb927.3.3450	Tb927.3.3450	arl3	ADP-ribosylation factor-like protein 3A, putative	19.881	15.7	0	5.1247	1		1.08248	0.0344214	0.151743	0.818891		11.8	2	2	1.33087	1.21067	0.0830251	3.7045	2	15.7	3	3	0.79912	0.99867	-0.000577996	16.127	4	15.7	3	3	0.73514	1.0491	0.0208169	6.5754	4
	1499	Tb927.4.4190	Tb927.4.4190		hypothetical protein, conserved	17.352	21	0	23.108	1		1.27679	0.106119	0.151797	0.818736		15.3	2	2	1.07439	0.982415	-0.0077051	14.749	2	21	3	2	0.93858	1.1813	0.0723602	14.487	2	15.9	2	1	1.2402	1.7935	0.253701	NaN	1
	1654	Tb927.6.990;Tb927.6.1060;Tb927.6.1050;Tb927.6.1000;Tb927.6.980;Tb927.6.970;Tb927.6.960;Tb927.6.1020;Tb927.6.1010	Tb927.6.990;Tb927.6.1060;Tb927.6.1050;Tb927.6.1000;Tb927.6.980;Tb927.6.970;Tb927.6.960;Tb927.6.1020;Tb927.6.1010	CP;CP;Rhodesain;CP;CP;CP;CP;CP;CP	cysteine peptidase precursor,cysteine peptidase, Clan CA, family C1, Cathepsin L-like (CP);cysteine peptidase precursor,cysteine peptidase, Clan CA, family C1, Cathepsin L-like (CP);cysteine peptidase precursor,cysteine peptidase, Clan CA, family C1, Cat	48.324	8.2	0	6.2974	9		1.01204	0.00519702	0.152723	0.816095		8.2	3	1	1.1126	1.02939	0.0125795	NaN	1	8.2	3	1	0.80316	0.99976	-0.000104243	NaN	1	6.5	2	1	0.7039	1.0072	0.00311572	NaN	1
	2420	Tb927.9.8680	Tb927.9.8680		cytochrome c oxidase assembly factor, putative	30.64	11.1	0	7.6549	1	1	1.06618	0.0278316	0.15334	0.814344		6.3	2	2	1.1211	1.02815	0.0120569	11.05	2	7.7	2	2	0.94538	1.1706	0.0684085	16.926	2	3	1	1	0.6968	1.007	0.00302947	NaN	1
	1745	Tb927.6.4160	Tb927.6.4160		hypothetical protein, conserved	47.703	16.7	0	45.41	1	1	1.02066	0.00888302	0.153788	0.813076		13	4	4	1.13863	1.03458	0.0147624	9.0122	4	13	4	4	0.78243	0.99041	-0.00418498	11.846	4	14.4	4	4	0.70481	1.0377	0.0160718	9.0673	5
	1440	Tb927.4.1980	Tb927.4.1980		hypothetical protein, conserved	91.11	30.3	0	184.14	1	1	1.02866	0.012273	0.15379	0.813073		25.5	15	15	1.10452	1.01473	0.00635221	19.741	15	29	16	16	0.80741	1.001	0.000434077	11.661	19	26.2	15	15	0.74681	1.0716	0.0300327	15.622	16
	128	Tb927.7.4770;Tb11.v5.0160	Tb927.7.4770;Tb11.v5.0160	PPIase	cyclophilin-type peptidyl-prolyl cis-trans isomerase, putative (PPIase);cyclophilin-type peptidyl-prolyl cis-trans isomerase, putative	18.59	41	0	34.419	2		1.02455	0.010532	0.153923	0.812698		41	7	7	1.07683	0.98912	-0.00475119	10.728	8	41	7	7	0.83504	1.0485	0.0205684	11.722	8	31.8	5	5	0.71718	1.037	0.0157788	8.8346	7
	1922	Tb927.7.5130	Tb927.7.5130		hypothetical protein, conserved	26.377	21.4	0	16.664	1	1	1.11694	0.0480282	0.15464	0.810677		21.4	4	4	1.04698	0.95057	-0.0220158	14.439	5	13.4	2	2	0.93613	1.1815	0.0724337	8.3802	2	16.4	3	3	0.86224	1.2407	0.0936668	18.465	3
	1933	Tb927.7.5480	Tb927.7.5480	DHFR-TS	dihydrofolate reductase-thymidylate synthase (DHFR-TS)	58.85	37.8	0	107.15	1	1	1.04587	0.0194764	0.155189	0.80914		32.6	16	16	1.10753	1.00402	0.00174063	7.8826	19	37.2	16	16	0.80265	1.0199	0.00855759	6.411	17	28.1	11	11	0.76565	1.1172	0.0481309	9.023	12
	1841	Tb927.7.2410	Tb927.7.2410		hypothetical protein, conserved	66.378	12.2	0	44.9	1	1	1.07103	0.0298036	0.155434	0.808454		10.7	6	6	1.10735	0.992457	-0.00328813	15.223	6	12.2	6	6	0.91799	1.18	0.071882	18.571	6	7.2	4	4	0.71999	1.0491	0.0208169	29.471	4
	2034	Tb927.8.2160	Tb927.8.2160	PGPA	multidrug resistance protein A,p-glycoprotein (PGPA)	174.68	39	0	323.31	1		1.02857	0.0122354	0.156692	0.804953		34.8	44	44	1.16829	1.07103	0.029802	11.586	56	36.9	44	44	0.79452	0.99757	-0.00105662	9.8916	61	26.1	33	33	0.70895	1.0185	0.00796103	16.865	41
	431	Tb927.10.14860	Tb927.10.14860		hypothetical protein, conserved	83.434	31.4	0	106.24	1	1	1.03032	0.0129704	0.156722	0.804869		28.3	18	18	1.07424	0.986485	-0.00590947	11.765	20	25.1	17	17	0.84481	1.0626	0.0263698	10.638	17	21.9	12	12	0.72176	1.0434	0.0184508	8.0593	14
	1302	Tb927.3.2130	Tb927.3.2130		hypothetical protein, conserved	81.531	10.9	0	19.377	1	1	1.21566	0.0848127	0.157826	0.80182		0	0	0	NaN	NaN		NaN	0	8.6	4	4	1.0966	1.3511	0.130687	63.241	5	10.9	5	5	0.75078	1.0938	0.0389379	16.759	3
	353	Tb927.10.12330	Tb927.10.12330	ZC3H34	zinc finger protein family member, putative (ZC3H34)	22.365	11.4	0	5.4787	1		1.60885	0.206515	0.158017	0.801296		5.9	1	1	1.34434	1.1884	0.0749612	NaN	1	11.4	3	3	0.87729	1.066	0.0277572	61.804	3	5	1	1	2.284	3.2872	0.516826	NaN	1
	503	Tb927.10.2810	Tb927.10.2810		hypothetical protein, conserved	38.589	28.4	0	47.25	1		1.0294	0.0125861	0.158365	0.80034		28.4	8	8	1.12383	0.998303	-0.000737711	26.846	7	15.7	5	5	0.81426	1.0174	0.00749173	13.205	7	20.4	5	5	0.74897	1.074	0.0310043	6.569	6
	2083	Tb927.8.3960	Tb927.8.3960		hypothetical protein, conserved	45.018	6.4	0	4.868	1	1	1.20507	0.0810131	0.158511	0.799941		2.2	1	1	1.20482	1.08885	0.0369681	NaN	1	0	0	0	NaN	NaN		NaN	0	4.2	1	1	0.92604	1.3337	0.125058	NaN	1
	447	Tb927.10.15420	Tb927.10.15420		hypothetical protein, conserved	44.361	29.2	0	59.092	1	1	1.04188	0.0178183	0.159223	0.797994		25.6	7	7	1.12661	1.03775	0.016094	6.6034	7	20	6	6	0.78468	0.98923	-0.00470272	20.656	6	20	6	6	0.76506	1.1017	0.0420633	18.078	6
	579	Tb927.10.5530	Tb927.10.5530		hypothetical protein, conserved	59.235	11	0	18.334	1		1.05478	0.0231632	0.159341	0.797673		9.2	5	5	1.22051	1.12069	0.0494843	15.385	5	11	6	6	0.7811	0.97672	-0.0102299	8.2178	5	2.3	1	1	0.73551	1.0721	0.0302353	NaN	1
	1907	Tb927.7.4320	Tb927.7.4320		hypothetical protein, conserved	31.197	4.7	0	5.2048	1	1	1.14589	0.0591438	0.160228	0.795263		4.7	1	1	1.32873	1.23513	0.0917134	NaN	1	4.7	1	1	0.84312	1.0631	0.0265741	NaN	1	0	0	0	NaN	NaN		NaN	0
	1528	Tb927.4.720	Tb927.4.720		hypothetical protein, conserved	12.297	27.6	0	23.371	1	1	1.11488	0.0472288	0.160978	0.793233		21	2	2	1.45397	1.31399	0.118592	27.94	2	21	2	2	0.7926	1.0022	0.000954398	12.958	2	27.6	3	3	0.72507	1.0523	0.0221396	7.5143	3
	1432	Tb927.4.1610	Tb927.4.1610	TAC40	hypothetical protein, conserved	39.631	7	0	5.4058	1	1	1.12435	0.0509028	0.161237	0.792535		7	2	2	1.15843	1.05356	0.0226605	19.678	2	3.6	1	1	0.95667	1.1999	0.0791451	NaN	1	0	0	0	NaN	NaN		NaN	0
	110	Tb927.10.6950;Tb927.10.6910;Tb11.v5.0496;Tb10.v4.0247	Tb927.10.6950;Tb927.10.6910;Tb11.v5.0496;Tb10.v4.0247		sterol 24-c-methyltransferase, putative;Sterol methyltransferase, putative;sterol 24-c-methyltransferase, putative;s-adenosyl-L-methionine-c-24-delta-sterol-methy lt ransferase a, putative,chrX additional, unordered contigs	40.128	25.9	0	59.342	4		1.07796	0.0326026	0.161843	0.790906		20.6	7	7	1.0852	0.960799	-0.0173673	6.3456	7	15	5	5	0.89677	1.1532	0.0619046	3.2662	6	19.8	5	5	0.78557	1.1305	0.0532706	3.4169	5
	860	Tb927.11.15020	Tb927.11.15020	TbSODB	iron superoxide dismutase (TbSODB)	23.28	11.5	0.0027027	2.593	1		1.5935	0.202353	0.162528	0.789071		11.5	2	1	1.18284	1.07331	0.030724	NaN	1	8.2	1	1	2.6949	3.2711	0.514694	NaN	1	8.2	1	1	0.81623	1.1525	0.0616409	NaN	1
	1989	Tb927.7.830	Tb927.7.830		telomerase-associated protein, putative	308.53	4.1	0	16.993	1		1.14472	0.0586989	0.162865	0.788171		1.6	4	4	1.552	1.35533	0.132044	28.434	4	3.3	6	6	0.92748	1.171	0.0685569	20.587	5	2.6	4	4	0.65129	0.94514	-0.0245039	85.047	4
	2127	Tb927.8.6030;Tb927.9.14000	Tb927.8.6030;Tb927.9.14000		60S ribosomal protein L12, putative;60S ribosomal protein L12, putative	17.564	23.2	0	11.579	2		1.16133	0.0649569	0.16403	0.785077		23.2	2	2	1.57173	1.45994	0.164335	54.905	2	23.2	2	2	0.86786	1.0766	0.0320544	22.02	2	23.2	2	2	0.69628	0.99651	-0.00151834	14.129	2
	1672	Tb927.6.1840	Tb927.6.1840		hypothetical protein, conserved	36.741	11.9	0	10.531	1	1	1.27732	0.106298	0.16413	0.784812		11.9	4	4	1.00457	0.924044	-0.0343075	14.423	4	3.2	1	1	1.4177	1.7892	0.252659	NaN	1	2.6	1	1	0.87002	1.2605	0.100543	NaN	1
	2230	Tb927.9.11580;Tb927.9.11600	Tb927.9.11580;Tb927.9.11600	gim5A;gim5B	Gim5A protein,glycosomal membrane protein (gim5A);unspecified product (gim5B)	26.408	36.2	0	101.21	2		1.01828	0.00786826	0.164532	0.783751		30.9	7	7	1.08299	0.992359	-0.00333123	8.6721	8	35.4	7	7	0.81337	1.0211	0.00906828	9.3805	7	36.2	8	8	0.70683	1.042	0.0178677	10.509	8
	2158	Tb927.8.6840	Tb927.8.6840	MLH1	mismatch repair protein MLH1 (MLH1)	95.739	4.1	0	7.2769	1		1.08623	0.0359207	0.165743	0.780564		1.4	1	1	1.32979	1.22867	0.0894342	NaN	1	4.1	3	3	0.82357	1.059	0.024896	15.341	3	1.4	1	1	0.68371	0.98499	-0.00656818	NaN	1
	272	Tb927.1.4100	Tb927.1.4100	COXIV	cytochrome oxidase subunit IV (COXIV)	40.534	32	0	64.193	1	1	1.03761	0.0160354	0.166018	0.779846		26.1	8	8	1.07515	0.979048	-0.00919584	32.327	14	29.7	7	7	0.83323	1.0654	0.0275127	25.021	12	25.2	5	5	0.73585	1.071	0.0297895	26.522	9
	547	Tb927.10.4180	Tb927.10.4180		TFIIF-stimulated CTD phosphatase, putative	28.189	5.3	0.0060189	2.1874	1		1.03165	0.0135322	0.166212	0.779339		5.3	1	1	1.11402	0.982704	-0.00757714	NaN	1	5.3	1	1	0.80803	1.0504	0.0213547	NaN	1	5.3	1	1	0.72253	1.0637	0.0268192	NaN	1
	2021	Tb927.8.1850	Tb927.8.1850		mitochondrial calcium uptake 1	45.709	25.1	0	76.923	1		1.0129	0.00556488	0.166877	0.777604		22.7	7	7	1.11297	1.02167	0.00931064	10.822	7	15.6	5	5	0.81512	1.0247	0.0105967	16.888	5	21	6	6	0.69057	0.99263	-0.0032126	21.536	7
	327	Tb927.10.11190	Tb927.10.11190		hypothetical protein, conserved	52.561	4.3	0	5.4161	1		1.08873	0.036921	0.167166	0.776852		4.3	2	2	1.25717	1.14371	0.0583148	33.504	2	2.1	1	1	0.8302	1.0364	0.0155274	NaN	1	2.1	1	1	NaN	NaN		NaN	0
	201	Tb11.v5.0685;Tb927.8.3110	Tb11.v5.0685;Tb927.8.3110		hypothetical protein, conserved;hypothetical protein, conserved	38.639	12.2	0	10.142	2		1.21072	0.0830452	0.167187	0.776797		12.2	3	3	1.12519	1.00634	0.00274474	6.3565	2	8.7	2	2	1.2677	1.6352	0.213571	72.77	2	8.7	2	2	0.74456	1.0785	0.0328201	18.271	2
	1546	Tb927.5.1240	Tb927.5.1240		hypothetical protein, conserved	39.438	45.5	0	134.05	1	1	1.01788	0.00769539	0.167355	0.77636		42.9	7	7	1.084	0.994036	-0.00259802	9.4106	9	36.1	7	7	0.81617	1.0166	0.00715011	10.663	10	33.5	6	6	0.7247	1.0436	0.0185341	6.3905	8
	468	Tb927.10.1890	Tb927.10.1890		calpain, putative,cysteine peptidase, Clan CA, family C2, putative	178.09	9.7	0	23.156	1		1.15786	0.0636552	0.167432	0.776161		3.3	4	4	1.05654	0.922935	-0.0348289	14.524	4	8.3	9	9	0.97681	1.2395	0.0932465	39.189	9	4.4	5	5	0.93856	1.3569	0.132548	51.104	5
	532	Tb927.10.3740	Tb927.10.3740		hypothetical protein, conserved	54.375	13.8	0	45.323	1		1.04675	0.0198419	0.170234	0.768954		11.2	4	4	1.21901	1.10995	0.0453042	14.53	4	8.3	3	3	0.87987	1.0565	0.0238695	3.408	3	9	3	3	0.67879	0.97803	-0.00964782	60.579	3
	1891	Tb927.7.3940	Tb927.7.3940	MCP16	mitochondrial carrier protein,adenine nucleotide mitochondrial translocator, putative (MCP16)	36.34	23.9	0	81.037	1		1.04114	0.0175101	0.171063	0.766844		18.7	5	5	1.21731	1.11089	0.0456707	8.7411	6	23.9	6	6	0.80713	1.0145	0.00625205	52.219	7	17.5	4	4	0.69787	1.0014	0.000607587	25.977	3
	1678	Tb927.6.2010	Tb927.6.2010		hypothetical protein, conserved	58.952	43.6	0	181.42	1	1	1.00807	0.00348949	0.173199	0.761456		31	12	12	1.11534	1.01975	0.00849499	6.8069	12	43.6	16	16	0.80012	0.99678	-0.00140068	7.3891	20	29.8	12	12	0.6983	1.0078	0.00337435	5.438	16
	2206	Tb927.9.10470	Tb927.9.10470		hypothetical protein, conserved	46.829	4.9	0	5.1572	1	1	1.11987	0.0491669	0.17326	0.761302		2.7	1	1	1.12787	1.0457	0.0194059	NaN	1	0	0	0	NaN	NaN		NaN	0	4.9	2	2	0.82413	1.1993	0.0789278	16.563	2
	1543	Tb927.5.1140	Tb927.5.1140	C/EK1	choline/ethanolamine kinase (C/EK1)	73.294	22	0	178.44	1		1.01016	0.00439173	0.173682	0.760246		16.6	6	6	1.09689	1.0005	0.000217093	20.314	8	14.6	5	5	0.8198	1.027	0.0115704	15.176	6	22	7	7	0.69534	1.0032	0.00138752	13.104	9
	507	Tb927.10.2920	Tb927.10.2920		hypothetical protein, conserved	114.97	4.7	0.0026918	2.5649	1		1.08157	0.0340527	0.174213	0.75892		0	0	0	NaN	NaN		NaN	0	2.4	1	1	0.91591	1.1345	0.0548045	NaN	1	2.4	1	1	0.73046	1.0311	0.0133008	NaN	1
	1156	Tb927.11.9400	Tb927.11.9400		hypothetical protein, conserved	95.905	4.2	0	8.8872	1		1.10275	0.0424773	0.17526	0.756318		1.5	1	1	1.41427	1.29564	0.112484	NaN	1	1.5	1	1	0.82467	1.0311	0.0133008	NaN	1	2.7	2	2	0.69981	1.0038	0.00164719	6.9308	2
	852	Tb927.11.14780;Tb927.9.5410	Tb927.11.14780		phosphomannose isomerase, putative	46.482	43	0	106.43	2		1.01559	0.00671662	0.175452	0.755843		40.8	16	16	1.07731	0.992457	-0.00328813	5.4544	19	41.3	16	16	0.80887	1.0174	0.00749173	10.537	20	35.9	13	13	0.71367	1.0374	0.0159462	24.979	15
	684	Tb927.10.9260	Tb927.10.9260		hypothetical protein, conserved	35.617	20.1	0	15.073	1		1.12637	0.0516811	0.175539	0.755627		20.1	4	4	1.04774	0.952381	-0.0211893	17.967	5	12.3	3	3	0.91108	1.1196	0.0490629	21.119	4	5.2	1	1	0.90654	1.3402	0.12717	23.012	3
	2347	Tb927.9.4230	Tb927.9.4230	ACS4	fatty acyl CoA synthetase 4 (ACS4)	77.871	32.1	0	45.716	1		1.36313	0.134538	0.175988	0.754516		30.9	18	1	0.900252	0.827267	-0.0823544	NaN	1	26.4	16	1	1.5685	1.9504	0.290124	NaN	1	24.2	12	1	1.0943	1.5698	0.195844	NaN	1
	655	Tb927.10.8090	Tb927.10.8090		hypothetical protein, conserved	17.195	27.6	0.0014279	3.3655	1	1	1.04203	0.017879	0.177634	0.750474		12.8	1	1	1.15925	1.04053	0.0172542	NaN	1	12.8	1	1	0.78709	0.98228	-0.0077647	NaN	1	27.6	2	2	0.76789	1.107	0.0441476	15.601	2
	2263	Tb927.9.1340	Tb927.9.1340	TbMlp-2	Myosin-like protein (TbMlp-2)	92.363	10.6	0	26.188	1		1.09833	0.0407313	0.179185	0.746698		6.3	4	4	1.14318	1.00315	0.00136588	11.687	4	5.8	4	4	0.81591	1.0268	0.0114859	26.456	4	3.2	2	2	0.85786	1.2863	0.109342	NaN	1
	1811	Tb927.7.1500	Tb927.7.1500	NBP 2	nucleotide binding protein, putative (NBP 2)	30.73	16.6	0	50.68	1		1.02874	0.0123065	0.180149	0.744368		10.7	2	2	1.08163	0.985513	-0.00633769	11.152	3	10.7	2	2	0.82267	1.0314	0.0134271	6.6406	3	16.6	3	3	0.74609	1.0711	0.02983	7.4122	4
	1144	Tb927.11.8990	Tb927.11.8990		cation transporter, putative	41.116	5.9	0	8.8124	1		1.10858	0.0447681	0.181136	0.741996		5.9	3	3	1.15953	1.05581	0.0235858	8.1296	3	5.9	3	3	1.0558	1.3152	0.118992	16.069	3	5.9	2	2	0.68371	0.98113	-0.00827344	17.567	2
	1253	Tb927.2.5800	Tb927.2.5800	SBPase	sedoheptulose-1,7-bisphosphatase (SBPase)	35.502	58.7	0	233.83	1		1.0048	0.00208051	0.181221	0.741791		58.1	15	15	1.10148	1.0026	0.0011264	12.371	25	53.6	14	14	0.7979	0.99906	-0.000408429	13.313	20	45.2	11	11	0.69911	1.0128	0.00552369	13.588	20
	986	Tb927.11.3530	Tb927.11.3530		hypothetical protein, conserved	26.464	19.1	0	9.3457	1		1.08745	0.0364089	0.181755	0.740513		14.2	4	4	1.28074	1.11876	0.0487354	113.59	4	14.2	4	4	0.75704	0.94902	-0.0227246	10.813	4	4.9	1	1	0.83008	1.2112	0.0832159	NaN	1
	517	Tb927.10.3260;Tb11.v5.0825	Tb927.10.3260		Long-chain-fatty-acid--CoA ligase 5 (EC 6.2.1.3) (Long-chain acyl-CoA synthetase 5) (LACS 5), putative	78.983	44	0	257.04	2		1.03905	0.016635	0.182426	0.738913		38	22	22	1.18631	1.08883	0.0369585	10.543	25	35.3	18	18	0.84835	1.0566	0.0239106	9.5337	21	30.6	15	15	0.67298	0.97507	-0.0109642	19.082	15
	2338	Tb927.9.3640	Tb927.9.3640		hypothetical protein, conserved	22.632	27.3	0	128.11	1	1	1.03964	0.0168818	0.182478	0.73879		26.3	4	4	1.09983	0.994431	-0.00242526	4.0575	6	26.3	4	4	0.81158	1.018	0.00774778	11.223	5	17.7	3	3	0.75462	1.11	0.045323	9.3345	3
	896	Tb927.11.16220	Tb927.11.16220		hypothetical protein, conserved	22.002	50.8	0	58.759	1	1	1.01282	0.00553438	0.183078	0.737364		50.8	10	10	1.09501	1.00658	0.00284959	7.0368	13	47.1	9	9	0.82449	1.0347	0.0148144	7.1108	13	38.5	7	7	0.69948	0.99756	-0.00106097	4.3054	9
	2161	Tb927.8.6960;Tb04.24M18.150	Tb927.8.6960;Tb04.24M18.150		hypothetical protein, conserved;hypothetical protein, conserved	42.527	13	0	17.792	2	1	1.03127	0.0133725	0.183982	0.735226		10.1	3	3	1.09039	0.988924	-0.00483704	6.9484	3	6	2	2	0.81275	1.0234	0.0100454	3.9453	2	7.5	2	2	0.73675	1.0837	0.0349091	30.666	3
	900	Tb927.11.16410	Tb927.11.16410		enolase, putative	55.68	5.5	0	12.429	1		1.08686	0.0361726	0.185286	0.732156		5.5	1	1	1.31707	1.22793	0.0891729	NaN	1	5.5	1	1	0.77543	0.95484	-0.0200694	NaN	1	5.5	1	1	0.75231	1.095	0.0394141	NaN	1
	1371	Tb927.3.4780;Tb927.3.4740	Tb927.3.4780;Tb927.3.4740		hypothetical protein, conserved;hypothetical protein, conserved	45.763	6.6	0	29.288	2		1.22821	0.0892726	0.186898	0.728396		6.6	2	2	1.03675	0.956846	-0.0191579	8.6269	2	6.6	2	2	0.8853	1.109	0.0449315	1.4142	3	6.6	2	2	1.2045	1.746	0.242044	22.092	2
	2049	Tb927.8.2770;Tb11.v5.0808	Tb927.8.2770	IP3R	insulin receptor,Ryanodine receptor	342.48	10.1	0	99.933	2		1.07974	0.0333205	0.186945	0.728286		8	19	19	1.01418	0.944733	-0.0246909	26.935	19	6.5	15	15	0.95991	1.1749	0.0700009	17.767	16	4.8	13	13	0.7858	1.1341	0.0546514	22.426	13
	2425	Tb927.9.8950	Tb927.9.8950		CAAX prenyl protease 1, putative,metallo- peptidase, Clan M- Family M48	48.904	12.4	0	19.163	1		1.04837	0.0205145	0.187443	0.727132		7.3	3	3	1.06622	0.964506	-0.015695	37.839	3	8.2	2	2	0.87629	1.0953	0.0395331	10.814	2	5.2	1	1	0.75307	1.0907	0.0377053	NaN	1
	1176	Tb927.11.9770	Tb927.11.9770		hypothetical protein, conserved	19.842	33.3	0	37.048	1		1.0818	0.0341457	0.187505	0.726988		33.3	4	4	1.09536	0.99108	-0.00389116	7.8006	5	33.3	4	4	0.80477	1.0295	0.0126264	16.724	6	27.4	3	3	0.8474	1.2408	0.0937018	16.085	4
	2087	Tb927.8.4330	Tb927.8.4330	RAB11	small GTP-binding protein Rab11 (RAB11)	23.527	26.4	0	29.236	1		1.03855	0.0164292	0.188211	0.725355		26.4	4	4	1.09767	0.997805	-0.000954411	9.8748	5	19.9	3	3	0.88183	1.1101	0.0453621	14.437	3	14.8	2	2	0.69942	1.0113	0.00488001	5.0676	3
	948	Tb927.11.240	Tb927.11.240		hypothetical protein, conserved	114.06	32.2	0	257.06	1	1	1.00257	0.0011147	0.188512	0.724661		28.1	24	24	1.0999	1.00599	0.00259194	11.216	31	28.1	24	24	0.80163	1.0035	0.00151738	8.2169	31	20.9	17	17	0.69385	0.99824	-0.000765032	9.9446	22
	1475	Tb927.4.3450	Tb927.4.3450		hypothetical protein, conserved	13.735	29.8	0	42.669	1	1	1.05393	0.022811	0.188755	0.724102		8.8	1	1	1.27102	1.15648	0.0631396	12.162	2	8.8	1	1	0.79226	0.9975	-0.0010871	0.25034	2	29.8	2	2	0.76319	1.0148	0.00638046	5.643	3
	1653	Tb927.5.960;Tb927.3.3280	Tb927.5.960	VPS4	hypothetical protein, conserved	37.159	58.5	0	146.24	2		1.00558	0.00241497	0.188762	0.724085		56.1	15	15	1.07919	0.998502	-0.00065093	14.505	18	51.3	13	13	0.80538	1.0031	0.00134423	7.0249	16	56.1	15	15	0.72065	1.0152	0.00655161	14.381	17
	1054	Tb927.11.5530	Tb927.11.5530		hypothetical protein, conserved	29.304	20.6	0	88.876	1	1	1.18073	0.0721495	0.18889	0.723792		14.9	3	3	1.21392	1.09403	0.03903	29.313	3	16.4	3	3	1.252	1.5708	0.196121	29.878	3	16.8	4	4	0.6402	0.95785	-0.0187025	14.864	3
	1527	Tb927.4.640	Tb927.4.640		hypothetical protein, conserved	52.055	4.5	0	4.54	1		1.06497	0.0273357	0.18983	0.721635		4.5	2	2	1.02303	0.951837	-0.0214374	12.946	2	4.5	2	2	0.91235	1.1337	0.0544981	3.174	2	2.4	1	1	0.78285	1.1193	0.0489465	NaN	1
	1433	Tb927.4.1670	Tb927.4.1670		hypothetical protein, conserved	17.389	24.8	0	27.896	1	1	1.15085	0.0610168	0.189858	0.72157		9.8	1	1	1.16689	1.01933	0.0083131	NaN	1	24.2	2	2	0.80447	1.0107	0.00462227	10.326	2	24.2	2	2	1.023	1.4795	0.170115	37.371	2
	1056	Tb927.11.5600	Tb927.11.5600	ATOM14	hypothetical protein, conserved	13.577	36.1	0	41.054	1	1	1.01369	0.0059042	0.190115	0.720984		36.1	3	3	1.08317	0.996115	-0.00169048	22.984	4	36.1	3	3	0.80246	1.0077	0.00333126	4.2576	4	36.1	3	3	0.71267	1.0377	0.0160718	5.0618	4
	1792	Tb927.6.920	Tb927.6.920		helicase, putative	107.47	5.4	0	12.211	1	1	1.16118	0.0649013	0.190222	0.720738		4.3	2	2	0.981354	0.903751	-0.0439514	13.555	2	2.8	1	1	1.138	1.4281	0.154759	NaN	1	1.1	1	1	0.83135	1.2131	0.0838966	NaN	1
	2348	Tb927.9.4310	Tb927.9.4310		tricarboxylate carrier, putative	35.625	17.4	0	16.207	1	1	1.07469	0.0312815	0.190297	0.720567		17.4	4	4	1.30964	1.20659	0.0815608	30.976	4	17.4	4	4	0.77361	0.96527	-0.0153512	28.413	4	17.4	4	4	0.73387	1.0657	0.027635	14.443	4
	479	Tb927.10.2230	Tb927.10.2230		adrenodoxin reductase, putative,ferredoxin NADP reductase-like protein	65.601	30.5	0	110.02	1	1	1.00908	0.00392544	0.190801	0.71942		17.5	9	9	1.09076	0.993838	-0.00268427	13.44	12	28.8	12	12	0.81885	1.0218	0.0093659	18.914	15	23	10	10	0.70817	1.0118	0.00509468	8.557	11
	1287	Tb927.3.1810	Tb927.3.1810		hypothetical protein, conserved	36.117	51.5	0	81.279	1	1	1.0283	0.012118	0.190985	0.719		33.1	8	8	1.12545	1.01029	0.0044482	2.9976	9	33.1	8	8	0.78893	0.99605	-0.00171886	9.3476	13	48.5	9	9	0.74368	1.0805	0.0336248	16.937	13
	1513	Tb927.4.4890	Tb927.4.4890		hypothetical protein, conserved	61.538	8.9	0	9.6215	1		1.12796	0.0522939	0.192046	0.716594		7.1	3	3	1.49457	1.33779	0.126389	31.114	3	4.2	2	2	0.91267	1.1646	0.0661768	16.315	2	7.1	3	3	0.62949	0.92112	-0.0356838	59.834	3
	822	Tb927.11.13730	Tb927.11.13730	ODC	ornithine decarboxylase (ODC)	46.882	4.5	0	11.248	1		1.07495	0.0313898	0.192103	0.716465		4.5	1	1	1.05922	0.943574	-0.0252239	NaN	1	4.5	1	1	0.91614	1.1579	0.0636711	NaN	1	4.5	1	1	0.77237	1.1369	0.0557223	NaN	1
	2214	Tb927.9.10640	Tb927.9.10640		synaptojanin (N-terminal domain), putative	83.045	59.3	0	323.31	1		1.01377	0.00593823	0.192768	0.714964		55.6	33	33	1.08529	0.99167	-0.00363282	8.6763	45	55.8	31	31	0.82834	1.0352	0.0150243	4.3591	49	58.1	34	34	0.70146	1.0149	0.00642325	8.8301	45
	1282	Tb927.3.1690	Tb927.3.1690		hypothetical protein, conserved	17.154	52.4	0	43.659	1	1	1.01854	0.00797894	0.193633	0.71302		52.4	8	8	1.11214	1.0215	0.00923965	3.3902	8	46.9	7	7	0.81622	1.0469	0.0199052	9.2453	8	34.5	5	5	0.67226	0.98808	-0.00520789	11.57	5
	253	Tb927.1.2400;Tb927.1.2380;Tb927.1.2360;Tb927.1.2340;Tb11.v5.0468	Tb927.1.2400;Tb927.1.2380;Tb927.1.2360;Tb927.1.2340;Tb11.v5.0468		alpha tubulin;alpha tubulin;alpha tubulin;alpha tubulin;alpha tubulin, putative	49.787	65	0	323.31	5		1.00845	0.00365259	0.193764	0.712727		58.1	20	20	1.07614	0.996016	-0.00173369	8.7439	37	60.5	19	19	0.8055	1.0068	0.00294321	9.6372	43	60.3	20	20	0.70388	1.0227	0.00974826	7.6591	41
	406	Tb927.10.1400;Tb927.10.1470	Tb927.10.1400;Tb927.10.1470	HGPRT;HGPRT	hypoxanthine-guanine phosphoribosyltransferase (HGPRT);hypoxanthine-guanine phosphoribosyltransferase (HGPRT)	23.36	46.7	0	75.958	2		1.01049	0.00453214	0.194843	0.710316		44.3	6	6	1.09174	0.993049	-0.00302945	8.6598	10	46.7	7	7	0.8156	1.0264	0.0113166	12.945	11	46.7	7	7	0.70292	1.0123	0.00530924	9.4318	10
	1306	Tb927.3.2260	Tb927.3.2260		hypothetical protein, conserved	26.421	18	0	6.8606	1	1	1.15425	0.0622998	0.194898	0.710193		11.8	2	2	1.28204	1.15423	0.0622916	0.23623	2	18	3	3	0.71999	0.91884	-0.0367601	36.673	2	6.1	1	1	0.98469	1.45	0.161368	NaN	1
	858	Tb927.11.14970	Tb927.11.14970		hypothetical protein, conserved	93.162	13.4	0	117.45	1		1.03299	0.0140974	0.195002	0.709961		9.1	7	7	1.13982	1.03093	0.0132283	18.84	7	11.3	8	8	0.86566	1.0888	0.0369481	31.052	8	9.7	7	7	0.68187	0.98201	-0.00788409	8.7688	8
	1190	Tb927.2.1790	Tb927.2.1790		hypothetical protein, conserved	13.117	28.7	0	10.484	1		1.17189	0.0688871	0.195393	0.709092		15.7	2	2	1.13621	1.04325	0.0183896	4.8699	2	21.7	2	2	1.2486	1.5663	0.194875	65.265	2	8.7	1	1	0.68427	0.98491	-0.00660345	NaN	1
	99	Tb927.5.4520;Tb05.5K5.160	Tb927.5.4520;Tb05.5K5.160		hypothetical protein, conserved;hypothetical protein, conserved,BAC from homologous region on chr5	108.2	14.6	0	61.854	2		1.02942	0.0125936	0.195425	0.709021		13.7	11	11	1.12815	1.01077	0.00465449	21.064	11	12	10	10	0.85964	1.085	0.0354297	18.591	9	8.3	6	6	0.67443	0.99471	-0.00230352	9.9187	6
	908	Tb927.11.16620	Tb927.11.16620		hypothetical protein, conserved	65.68	5.3	0	8.7099	1		1.59919	0.203899	0.195683	0.708447		0	0	0	NaN	NaN		NaN	0	3.1	1	1	0.93664	1.148	0.0599419	NaN	1	5.3	2	2	1.5283	2.2277	0.347857	131	2
	707	Tb927.11.10040	Tb927.11.10040		hypothetical protein, conserved	13.539	30.3	0	13.803	1	1	1.07982	0.0333518	0.196515	0.706605		30.3	3	3	1.06886	0.956389	-0.0193656	18.125	3	22.1	2	2	0.85639	1.0761	0.0318526	11.998	2	6.6	1	1	0.84318	1.2234	0.0875685	NaN	1
	1958	Tb927.7.6270	Tb927.7.6270		peptidase t, putative,aminotripeptidase, putative	44.647	24.4	0	51.473	1		1.01992	0.00856486	0.196576	0.706469		16	4	4	1.12502	1.02416	0.0103678	11.944	5	19.7	5	5	0.78987	0.98631	-0.00598656	29.235	7	14	4	4	0.72742	1.0503	0.0213134	23.793	4
	1519	Tb927.4.5110	Tb927.4.5110	kkt8	hypothetical protein, conserved	44.568	13.8	0	14.393	1		1.07058	0.0296186	0.196606	0.706402		10.8	4	4	1.04892	0.960984	-0.0172838	12.468	3	8.8	3	3	0.96616	1.196	0.0777312	244.37	3	3.5	1	1	0.73696	1.0676	0.0284086	NaN	1
	1608	Tb927.5.3410	Tb927.5.3410		hypothetical protein, conserved	30.982	34.6	0	27.776	1	1	1.02698	0.0115615	0.196907	0.70574		24.7	6	6	1.0891	0.985319	-0.00642323	14.424	6	20.2	5	5	0.82185	1.0243	0.0104272	12.734	5	19	4	4	0.74592	1.0732	0.0306807	7.3367	4
	2299	Tb927.9.15270	Tb927.9.15270		hypothetical protein, conserved	65.909	14	0	14.752	1		1.14087	0.0572374	0.197014	0.705503		14	6	6	0.991277	0.893895	-0.0487136	26.358	6	12.3	5	5	1.0091	1.3099	0.117238	11.092	5	5.1	2	2	0.87511	1.2682	0.103188	25.471	3
	1317	Tb927.3.2620	Tb927.3.2620		hypothetical protein, conserved	216.87	5.9	0	66.331	1		1.31219	0.117997	0.198186	0.702927		4.9	8	8	1.08565	0.977135	-0.0100454	18.059	8	4.1	7	7	0.83023	1.0633	0.0266558	46.185	6	1.6	2	2	1.512	2.1746	0.337379	105.27	2
	1193	Tb927.2.2130	Tb927.2.2130		small GTP-binding protein RAB6, putative	25.385	21.3	0	9.2034	1		1.07374	0.030899	0.198308	0.702659		21.3	4	4	1.2195	1.11402	0.046893	26.284	4	15.7	3	3	0.74488	0.94372	-0.0251568	15.486	3	4.8	1	1	0.81213	1.1775	0.0709609	NaN	1
	1814	Tb927.7.1590	Tb927.7.1590	CYC8	mitotic cyclin,cyclin CycB3 (CYC8)	53.54	5.8	0	6.1805	1		1.08847	0.036818	0.198353	0.702561		1.9	1	1	1.03519	0.959969	-0.0177427	NaN	1	3.6	2	2	0.852	1.066	0.0277572	9.1151	2	3.8	2	2	0.87497	1.2602	0.100439	NaN	1
	1473	Tb927.4.3300	Tb927.4.3300		mitochondrial ATP-dependent zinc metallopeptidase, putative,metallo-peptidase, Clan MA(E) Family M41	78.872	15.2	0	19.097	1	1	1.04041	0.0172064	0.19859	0.702043		6.7	5	5	1.15691	1.05017	0.021258	7.2464	5	10.4	7	7	0.77556	0.97165	-0.0124901	49.972	7	11.5	7	7	0.83826	1.1037	0.042851	40.813	8
	1681	Tb927.6.2140	Tb927.6.2140		hypothetical protein, conserved	28.771	46.8	0	99.567	1	1	1.01521	0.00655432	0.199047	0.701044		46.8	9	9	1.10158	1.0115	0.00496632	7.7557	10	42.7	8	8	0.82831	1.0421	0.0179094	10.967	9	38.6	7	7	0.68296	0.99263	-0.0032126	9.5916	9
	1170	Tb927.11.9670	Tb927.11.9670	GCVT1	glycine synthase, putative (GCVT1)	41.142	20.5	0	20.338	1	1	1.19347	0.0768113	0.199403	0.700269		20.5	4	4	0.975895	0.873744	-0.0586158	14.255	3	10.4	2	2	1.0116	1.2623	0.101163	36.091	2	3.7	1	1	1.0714	1.5413	0.187887	NaN	1
	711	Tb927.11.1010	Tb927.11.1010		chaperone protein DNAj, putative	41.739	26.4	0	30.475	1	1	1.0901	0.0374678	0.2	0.69897		7.5	2	2	1.40353	1.26802	0.103127	4.6399	2	10.8	3	3	0.7655	0.95951	-0.0179505	37.81	3	26.4	6	6	0.74144	1.0647	0.0272273	14.095	7
	334	Tb927.10.11370	Tb927.10.11370		hypothetical protein, conserved	17.772	10.3	0	4.0726	1	1	1.15443	0.0623677	0.20024	0.698449		10.3	1	1	1.14168	1.03988	0.0169828	NaN	1	0	0	0	NaN	NaN		NaN	0	10.3	1	1	0.88383	1.2816	0.107752	NaN	1
	550	Tb927.10.4240	Tb927.10.4240		hypothetical protein, conserved	14.753	30	0	13.526	1	1	1.18036	0.0720138	0.200536	0.697807		30	4	4	1.13373	1.0177	0.00761892	2.6126	4	23.3	3	3	0.781	1.0007	0.0003039	26.38	3	8.3	1	1	1.1237	1.6148	0.208119	NaN	1
	1280	Tb927.3.1630	Tb927.3.1630	CK1	casein kinase 1, putative (CK1)	45.179	14	0	10.893	1		1.07879	0.0329366	0.201368	0.69601		14	5	5	1.0811	0.963948	-0.0159463	26.663	5	8.8	3	3	0.80982	1.0558	0.0235817	24.045	3	6.8	2	2	0.84502	1.2336	0.0911744	27.761	2
	1399	Tb927.3.5650	Tb927.3.5650		protein kinase, putative,serine/threonine protein kinase, putative	103.57	23.5	0	104.18	1		1.04881	0.0206967	0.201832	0.695009		20.9	16	16	1.07041	0.967492	-0.0143525	13.064	15	17	13	13	0.84518	1.0535	0.0226345	13.431	13	11.5	9	9	0.78556	1.1319	0.0538081	38.481	10
	1353	Tb927.3.3900	Tb927.3.3900	CPT II	carnitine O-palmitoyltransferase II, putative (CPT II)	67.395	24.2	0	68.841	1	1	1.02407	0.0103316	0.201834	0.695005		20	9	9	1.08978	0.99681	-0.00138757	49.375	10	20.1	9	9	0.85934	1.0712	0.0298706	13.833	10	17.7	8	8	0.6957	1.0058	0.00251163	8.5692	9
	1997	Tb927.8.1010	Tb927.8.1010		chaperone protein DNAj, putative	55.325	6.7	0	11.18	1		1.09834	0.040736	0.202127	0.694376		3.5	1	1	1.01569	0.921659	-0.0354298	NaN	1	3.3	1	1	0.92186	1.1632	0.0656544	NaN	1	3.5	1	1	0.87271	1.2359	0.0919833	NaN	1
	1576	Tb927.5.2100	Tb927.5.2100	RBP30	hypothetical protein, conserved	49.665	12.3	0	21.89	1	1	1.09302	0.0386262	0.202464	0.693653		8.6	3	3	1.16048	1.05679	0.0239895	34.033	3	6	3	3	0.76005	0.96233	-0.016676	13.333	3	4.9	2	2	0.88203	1.284	0.108565	21.162	2
	1754	Tb927.6.4330	Tb927.6.4330		hypothetical protein, conserved	23.949	20.2	0	10.98	1		1.38222	0.140576	0.202962	0.692585		0	0	0	NaN	NaN		NaN	0	20.2	3	3	0.87103	1.0875	0.0364293	17.126	3	7	1	1	1.2044	1.7568	0.244722	NaN	1
	2383	Tb927.9.6510	Tb927.9.6510		hypothetical protein, conserved	75.135	15.8	0	38.63	1	1	1.07649	0.0320118	0.20417	0.690009		13.4	8	8	1.14528	1.04569	0.0194013	5.8092	9	8.4	5	5	1.0029	1.232	0.0906107	29.505	5	4.2	2	2	0.66367	0.96833	-0.0139766	4.0871	2
	2044	Tb927.8.2670	Tb927.8.2670		hypothetical protein, conserved	49.125	26.2	0	61.399	1	1	1.05289	0.0223823	0.20504	0.688161		17.5	6	6	1.14245	1.02857	0.0122355	4.8309	10	14.7	5	5	0.78919	0.97944	-0.00902216	6.8995	8	11.2	3	3	0.80068	1.1586	0.0639335	21.543	2
	307	Tb927.10.10420	Tb927.10.10420		monothiol glutaredoxin, putative	14.888	10.7	0.0027385	2.7285	1	1	1.05545	0.0234373	0.206345	0.685407		10.7	1	1	1.07264	0.951475	-0.0216027	NaN	1	10.7	1	1	0.87221	1.1286	0.05254	NaN	1	10.7	1	1	0.74392	1.0949	0.0393745	NaN	1
	2435	Tb927.9.9600	Tb927.9.9600		DNA replication licensing factor MCM9, putative	84.571	9.6	0	19.049	1		1.27768	0.106421	0.206529	0.685019		0	0	0	NaN	NaN		NaN	0	3.2	2	2	0.84287	1.061	0.0257154	20.565	2	8	4	4	1.0652	1.5386	0.187126	37.963	3
	411	Tb927.10.14140;Tb11.v5.0605	Tb927.10.14140;Tb11.v5.0605	PYK1	pyruvate kinase 1 (PYK1);pyruvate kinase 1, putative	54.423	12.8	0	32.906	2		1.10027	0.0414981	0.206704	0.684652		5.6	2	2	1.44198	1.31385	0.118547	59.844	2	4.8	2	2	0.76569	0.95776	-0.0187433	25.576	2	11.4	4	4	0.72631	1.0585	0.0246909	38.54	4
	316	Tb927.10.10850	Tb927.10.10850	AGO1	argonaute-like protein (AGO1)	99.184	4.8	0	5.5405	1		1.05705	0.0240969	0.20681	0.684428		2.5	2	2	1.25518	1.15059	0.0609202	14.407	2	2.2	2	2	0.77259	0.95562	-0.0197148	10.095	2	1.4	1	1	0.75535	1.0742	0.0310851	NaN	1
	104	Tb927.10.4430;Tb10.v4.0033;Tb11.v5.0767	Tb927.10.4430;Tb10.v4.0033;Tb11.v5.0767	PUF1;PUF1	pumillo RNA binding protein PUF1 (PUF1);pumillo RNA binding protein PUF1,chrX additional, unordered contigs (PUF1);pumillo RNA binding protein PUF1, putative	63.851	5.2	0.002736	2.7065	3		1.12995	0.053058	0.207277	0.683449		1.4	1	1	1.17039	1.0295	0.0126242	NaN	1	5.2	2	2	0.97309	1.2402	0.0934917	17.914	2	0	0	0	NaN	NaN		NaN	0
	1988	Tb927.7.800	Tb927.7.800	MRB800	mitochondrial RNA binding complex 1 subunit (MRB800)	60.484	8.5	0	6.2159	1	1	1.64972	0.217409	0.207765	0.682427		3.7	2	2	1.23201	1.12512	0.0512008	51.529	2	6.4	2	2	1.929	2.4189	0.383618	152.08	2	0	0	0	NaN	NaN		NaN	0
	2077	Tb927.8.3630;Tb927.8.3650;Tb927.8.3620;Tb11.v5.0766	Tb927.8.3630;Tb927.8.3650;Tb927.8.3620;Tb11.v5.0766		folate transporter, putative,expression site-associated gene 10 (ESAG10) protein, putative;folate transporter, putative,expression site-associated gene 10 (ESAG10) protein, putative;folate transporter, putative,expression site-associated gene 10 (ESAG10)	69.808	9	0	9.8437	4		1.18558	0.0739292	0.207959	0.682022		9	4	4	1.15436	1.05281	0.0223496	12.752	4	3.6	2	2	0.77633	0.95959	-0.0179143	3.4473	2	6.2	2	2	1.1383	1.6495	0.217352	13.182	2
	1047	Tb927.11.540	Tb927.11.540	ABCB10	ABC transporter, putative (ABCB10)	76.244	31.7	0	142.5	1		1.02014	0.0086593	0.208208	0.681502		21.7	9	9	1.08905	0.998502	-0.00065093	8.9847	14	30.8	12	12	0.78609	1.0022	0.000954398	15.857	14	23.3	10	10	0.72834	1.0609	0.0256744	29.351	13
	700	Tb927.10.9900	Tb927.10.9900		ABC1 protein, putative	62.856	6.6	0	10.028	1	1	1.18503	0.0737288	0.208572	0.680744		6.6	3	3	1.03033	0.928419	-0.032256	17.243	3	6.6	3	3	0.88104	1.0979	0.0405628	28.023	3	4.8	2	2	1.1309	1.6326	0.21288	38.399	2
	719	Tb927.11.10260	Tb927.11.10260		hypothetical protein, conserved	51.855	5.1	0	5.1791	1		1.06949	0.0291769	0.209431	0.678959		5.1	2	2	1.14638	1.04849	0.0205655	28.537	3	5.1	2	2	0.96301	1.2105	0.0829648	1.6214	2	3.4	1	1	0.66085	0.96383	-0.0159996	NaN	1
	889	Tb927.11.15980	Tb927.11.15980		hypothetical protein, conserved	54.556	16.8	0	51.809	1		1.07803	0.0326301	0.209955	0.677873		5.2	2	2	1.34834	1.21966	0.0862391	10.948	2	16.8	5	5	0.74774	0.94255	-0.0256956	0.87749	6	9.8	3	3	0.7527	1.0898	0.0373468	12.114	3
	1506	Tb927.4.440	Tb927.4.440		hypothetical protein, conserved	13.767	12.5	0.0095873	1.9546	1		1.09772	0.0404931	0.210799	0.67613		12.5	1	1	1.10666	1.02075	0.00892024	NaN	1	0	0	0	NaN	NaN		NaN	0	12.5	1	1	0.82079	1.1805	0.072066	NaN	1
	604	Tb927.10.6510;Tb927.10.6400	Tb927.10.6510;Tb927.10.6400	HSP60;HSP60	chaperonin HSP60, mitochondrial precursor (HSP60);chaperonin HSP60, mitochondrial precursor (HSP60)	59.503	66.4	0	323.31	2		1.00626	0.00271053	0.211989	0.673688		66.4	35	35	1.08955	0.999101	-0.000390693	11.94	62	64.9	32	32	0.80126	1.0009	0.000390689	18.455	65	60.5	29	29	0.71402	1.0189	0.00813156	9.5166	59
	1041	Tb927.11.5230	Tb927.11.5230		hypothetical protein, conserved	25.968	10.6	0	7.006	1		1.94911	0.289836	0.212128	0.673401		6	1	1	0.672993	0.623753	-0.204988	NaN	1	10.6	2	2	1.4842	1.8696	0.271749	74.706	2	10.6	2	2	4.3542	6.3496	0.802746	NaN	1
	1785	Tb927.6.610	Tb927.6.610		hypothetical protein, conserved	64.961	6.7	0	6.5982	1	1	1.09726	0.0403087	0.212289	0.673073		4.5	2	2	1.01585	0.911743	-0.0401274	14.176	2	5.2	2	2	0.95698	1.1806	0.0721028	40.986	2	2.2	1	1	0.80768	1.2273	0.0889507	NaN	1
	433	Tb927.10.14930	Tb927.10.14930	ZC3H39	zinc finger protein family member, putative (ZC3H39)	31.519	28.1	0	163.62	1		1.03967	0.0168941	0.212575	0.672488		28.1	6	6	1.06752	0.961723	-0.0169498	12.986	6	27.7	5	5	0.86497	1.0882	0.0367087	4.0736	5	18.9	3	3	0.73803	1.0738	0.0309234	14.778	4
	1286	Tb927.3.1790	Tb927.3.1790		pyruvate dehydrogenase E1 beta subunit, putative	37.566	38.8	0	165.44	1	1	1.036	0.0153609	0.213139	0.671338		32.2	9	9	1.04947	0.966838	-0.0146465	13.369	8	35.6	10	10	0.83762	1.0558	0.0235817	17.749	11	25.9	6	6	0.74851	1.0893	0.0371475	23.423	7
	1950	Tb927.7.5950;Tb927.7.5990;Tb927.7.5970;Tb927.7.5930;Tb927.7.5960;Tb927.7.6000;Tb927.7.5980	Tb927.7.5950;Tb927.7.5990;Tb927.7.5970;Tb927.7.5930;Tb927.7.5960	PAD1;PAD3;PAD4;PAD5;PAD6;PAD7	protein associated with differentiation 3, putative;protein associated with differentiation 7, putative;protein associated with differentiation 5, putative;Protein Associated with Differentiation (TbPAD1);protein associated with differentiation 4, puta	65.344	11.5	0	4.1849	7	1	1.12158	0.0498298	0.213192	0.671229		11.5	5	1	1.06945	0.979624	-0.00894063	NaN	1	9.7	5	2	1.1071	1.4124	0.149958	8.5086	2	9.7	5	2	0.69595	1.0197	0.00847242	18.122	2
	2375	Tb927.9.6090;Tb927.9.6100;Tb11.v5.0854	Tb927.9.6090;Tb927.9.6100		PTP1-interacting protein, 39 kDa;TFIIF-stimulated CTD phosphatase, putative	39.499	12.5	0	7.5519	3		1.11437	0.0470302	0.213302	0.671005		9.9	3	3	0.985416	0.898069	-0.0466902	7.7744	4	2	1	1	0.96227	1.203	0.0802656	NaN	1	7.3	2	2	0.88415	1.2809	0.107515	10.82	2
	563	Tb927.10.4850	Tb927.10.4850		hypothetical protein, conserved	51.34	19.1	0	14.335	1	1	1.15267	0.061705	0.213477	0.670649		0	0	0	NaN	NaN		NaN	0	4.9	1	1	1.0329	1.2902	0.110657	NaN	1	14.2	4	4	0.70776	1.0298	0.0127529	43.358	4
	1315	Tb927.3.2490	Tb927.3.2490		hypothetical protein, conserved	110.07	12.4	0	40.683	1		1.071	0.0297881	0.21357	0.67046		7.9	6	6	1.34354	1.22409	0.0878151	13.386	7	10.1	8	8	0.75603	0.96973	-0.0133492	7.6272	6	10.7	8	8	0.68227	1.0349	0.0148984	21.484	8
	771	Tb927.11.11810	Tb927.11.11810		hypothetical protein, conserved	118.25	14.9	0	83.433	1		1.02499	0.0107189	0.213642	0.670314		9.5	6	6	1.17217	1.07279	0.0305143	26.657	5	14	9	9	0.81466	1.0198	0.00851501	24.032	8	11.5	7	7	0.67802	0.9843	-0.00687251	74.756	7
	319	Tb927.10.11050	Tb927.10.11050		hypothetical protein, conserved	35.053	32.4	0	38.435	1	1	1.06323	0.0266283	0.213743	0.670108		26.9	9	9	1.05356	0.95511	-0.0199467	18.428	12	21.2	6	6	0.84426	1.0626	0.0263698	12.252	8	23.1	6	6	0.82012	1.1843	0.0734617	7.1211	8
	675	Tb927.10.8950;Tb927.10.8970	Tb927.10.8950;Tb927.10.8970		kinetoplast DNA-associated protein, putative;kinetoplast DNA-associated protein, putative	14.183	16.7	0	4.8455	2	1	1.0762	0.0318933	0.21436	0.668857		7.1	1	1	1.35437	1.22861	0.089413	NaN	1	16.7	2	2	0.7469	0.94905	-0.0227109	7.0677	2	9.5	1	1	0.71724	1.069	0.0289777	NaN	1
	1424	Tb927.4.1360	Tb927.4.1360		hypothetical protein, conserved	32.547	30	0	30.592	1		1.04271	0.0181652	0.215774	0.666001		22.2	6	6	1.24485	1.11131	0.0458348	10.152	7	24.6	6	6	0.76215	0.96122	-0.0171772	35.846	7	14.7	2	2	0.73332	1.0613	0.0258382	1.8237	2
	1554	Tb927.5.1520	Tb927.5.1520		heat shock protein HslVU, ATPase subunit HslU, putative	52.53	38.7	0	150.51	1	1	1.00931	0.00402544	0.215884	0.66578		38.7	15	15	1.12458	1.01937	0.008331	14.595	14	37.9	14	14	0.79749	1.0185	0.00796103	13.335	13	37.1	12	12	0.68141	0.99034	-0.00421568	10.172	13
	1096	Tb927.11.6870	Tb927.11.6870		14-3-3 protein	29.196	29.8	0	33.3	1		1.1227	0.0502628	0.216144	0.665256		19	4	4	1.52472	1.37684	0.138884	33.165	3	23.8	5	5	0.89861	1.126	0.0515384	68.562	7	21	5	5	0.6267	0.91278	-0.0396339	80.078	6
	270	Tb927.1.3950	Tb927.1.3950	ALAT	alanine aminotransferase (ALAT)	55.704	17.7	0	42.509	1	1	1.04345	0.0184731	0.216351	0.66484		13.1	4	4	1.10727	1.00795	0.00344028	11.906	4	13.1	4	4	0.88339	1.138	0.0561423	13.793	4	17.7	5	5	0.68658	0.99046	-0.00416306	13.405	5
	549	Tb927.10.4220	Tb927.10.4220		hypothetical protein, conserved	34.243	22.3	0	18.771	1	1	1.40032	0.146226	0.216535	0.664472		16.8	4	4	1.01264	0.923191	-0.0347086	10.527	4	11.3	3	3	0.85545	1.0689	0.0289371	23.94	4	13.3	3	3	1.9322	2.7826	0.444451	170.58	2
	1080	Tb927.11.6280;REV__Tb927.10.5140	Tb927.11.6280	PPDK	pyruvate phosphate dikinase (PPDK)	100.45	51	0	323.31	2		1.00704	0.00304581	0.21675	0.664042		49.6	42	42	1.08554	1.00107	0.00046488	9.7603	54	47	39	39	0.79981	0.9986	-0.000608438	12.808	53	34.8	29	29	0.70941	1.0216	0.00928088	12.144	40
	779	Tb927.11.12290	Tb927.11.12290		hypothetical protein, conserved	53.709	9.3	0	9.272	1		1.19862	0.0786832	0.2171	0.66334		5.2	2	2	1.11747	1.03464	0.0147893	3.8843	2	0	0	0	NaN	NaN		NaN	0	4.2	1	1	0.94814	1.3886	0.142577	NaN	1
	2175	Tb927.8.7560	Tb927.8.7560		hypothetical protein, conserved	63.058	12.6	0	95.534	1		1.05639	0.0238234	0.217372	0.662797		12.6	5	5	1.32195	1.18001	0.0718861	8.3288	6	12.6	5	5	0.79069	1.0204	0.00877045	5.8269	6	6.7	3	3	0.68232	0.97907	-0.00918626	3.7906	4
	2084	Tb927.8.4150	Tb927.8.4150	TimRhom II	hypothetical protein, conserved	33.246	8	0	8.7209	1	1	1.14156	0.0574993	0.217631	0.662279		8	2	2	1.12784	1.02482	0.010648	6.1501	2	7	1	1	1.0025	1.2716	0.104351	NaN	1	0	0	0	NaN	NaN		NaN	0
	2227	Tb927.9.11280	Tb927.9.11280		unspecified product	35.601	7.5	0	22.989	1		1.43468	0.156754	0.218505	0.660539		7.5	2	2	1.15043	1.06736	0.0283113	NaN	1	3.9	1	1	1.5382	1.9284	0.285197	NaN	1	0	0	0	NaN	NaN		NaN	0
	1925	Tb927.7.5260	Tb927.7.5260		hypothetical protein, conserved	22.68	6.7	0.0035351	2.4418	1	1	1.12562	0.0513925	0.218843	0.659867		6.7	1	1	1.10544	1.00052	0.000225774	NaN	1	6.7	1	1	0.78855	0.99017	-0.00429024	NaN	1	6.7	1	1	0.9873	1.4396	0.158242	NaN	1
	2108	Tb927.8.5310	Tb927.8.5310		hypothetical protein, conserved	37.608	4.9	0	14.949	1		1.20596	0.0813314	0.219038	0.659481		4.9	1	1	1.12481	1.03386	0.0144613	NaN	1	4.9	1	1	1.1957	1.4067	0.148201	NaN	1	0	0	0	NaN	NaN		NaN	0
	1904	Tb927.7.4210	Tb927.7.4210		hypothetical protein, conserved	13.418	44.8	0	31.55	1	1	1.03752	0.0159961	0.219209	0.659141		35.3	3	3	1.05452	0.960984	-0.0172838	6.9303	4	44.8	5	5	0.86171	1.0741	0.0310447	5.7554	5	19	1	1	0.74164	1.082	0.0342273	NaN	1
	1860	Tb927.7.3050	Tb927.7.3050		hypothetical protein, conserved	131.58	18.6	0	151.3	1	1	1.0443	0.0188268	0.219478	0.65861		16.7	12	12	1.08017	0.985707	-0.00625207	20.178	14	15.8	12	12	0.81057	1.012	0.00518051	11.816	12	11.7	7	7	0.78775	1.1417	0.057552	11.326	6
	1472	Tb927.4.330	Tb927.4.330		hypothetical protein, conserved	43.016	7.4	0	6.6683	1	1	1.06862	0.0288251	0.2206	0.656395		7.4	2	2	1.14041	1.03364	0.0143672	12.009	2	3.4	1	1	0.77187	0.96645	-0.0148206	NaN	1	4	1	1	0.84613	1.2216	0.086929	NaN	1
	556	Tb927.10.4610	Tb927.10.4610	DPMS	dolicholphosphate-mannose synthase, putative (DPMS)	29.086	7.3	0	4.1077	1		1.13861	0.0563769	0.220759	0.656081		3.9	1	1	0.98464	0.895576	-0.0478977	NaN	1	3.5	1	1	0.93997	1.1479	0.0599041	NaN	1	3.5	1	1	1.0007	1.4359	0.157124	NaN	1
	1188	Tb927.2.1680;Tb927.2.1560	Tb927.2.1680;Tb927.2.1560		cyclophilin-type peptidyl-prolyl cis-trans isomerase, putative;cyclophilin-type peptidyl-prolyl cis-trans isomerase, putative	21.165	40.8	0	122.69	2	1	1.20482	0.0809223	0.221817	0.654004		36.2	4	4	1.03127	0.925241	-0.0337454	21.314	6	20.9	3	3	1.4062	1.7702	0.248022	34.994	4	26.5	3	3	0.74106	1.0678	0.0284899	27.777	4
	2243	Tb927.9.12400	Tb927.9.12400		protein kinase, putative	148.15	19.8	0	183.24	1		1.03288	0.0140497	0.221896	0.653851		13.9	12	12	1.19835	1.09997	0.0413789	15.156	13	17.9	15	15	0.81702	1.0243	0.0104272	16.845	14	15.1	12	12	0.67715	0.97801	-0.0096567	20.267	12
	2319	Tb927.9.2620	Tb927.9.2620		hypothetical protein, conserved	76.723	5.2	0	21.827	1	1	1.79792	0.254771	0.222604	0.652468		5.2	3	3	1.2232	1.09767	0.0404722	10.392	3	1.3	1	1	NaN	NaN		NaN	0	2.4	1	1	2.044	2.9449	0.469071	NaN	1
	1765	Tb927.6.4560	Tb927.6.4560		hypothetical protein, conserved	47.192	21.6	0	44.654	1	1	1.16152	0.0650276	0.222989	0.651717		17	6	6	1.09017	1.00389	0.00168829	14.286	7	15	4	4	0.75904	0.97799	-0.00966559	34.367	5	15.5	4	4	1.1067	1.5961	0.20306	49.647	4
	914	Tb927.11.16750	Tb927.11.16750		hypothetical protein, conserved	25.871	12.8	0	4.9102	1	1	1.13005	0.0530962	0.223606	0.650516		12.8	2	2	1.60945	1.45796	0.163746	14.974	2	6.8	1	1	0.83371	1.0434	0.0184508	NaN	1	6.8	1	1	0.65317	0.94862	-0.0229077	NaN	1
	527	Tb927.10.3580	Tb927.10.3580		hypothetical protein, conserved	35.612	18.2	0	11.354	1	1	1.11736	0.0481929	0.224065	0.649626		18.2	6	6	1.00439	0.888652	-0.0512684	9.8934	6	15.7	5	5	0.94936	1.1879	0.0747799	17.544	4	3.1	1	1	0.9155	1.3215	0.121067	NaN	1
	1390	Tb927.3.5350	Tb927.3.5350		hypothetical protein, conserved	11.599	18.1	0	9.562	1		1.76109	0.245781	0.224558	0.648672		18.1	2	2	0.707764	0.636173	-0.196425	97.802	2	18.1	1	1	1.3263	1.6568	0.21927	NaN	1	18.1	2	2	3.5621	5.182	0.714497	149.93	2
	2174	Tb927.8.7530	Tb927.8.7530		3,2-trans-enoyl-CoA isomerase, mitochondrial precursor, putative	39.776	36	0	124.94	1	1	1.00511	0.00221165	0.226128	0.645646		36	9	7	1.0856	0.997208	-0.00121433	3.0008	13	36	9	7	0.79915	1.0024	0.00104106	12.56	12	25.7	5	5	0.70796	1.0158	0.00680821	7.661	10
	1847	Tb927.7.2680	Tb927.7.2680	ZC3H22	zinc finger protein family member, putative (ZC3H22)	76.183	16.5	0	22.949	1		1.04602	0.0195406	0.226188	0.64553		11.2	5	5	1.0713	0.95048	-0.022057	21.69	7	11	5	5	0.89267	1.1133	0.0466122	20.404	4	6.8	3	3	0.74939	1.0816	0.0340667	45.57	4
	320	Tb927.10.11060	Tb927.10.11060		hypothetical protein, conserved	8.8635	21.9	0.0014333	3.4437	1	1	1.05875	0.024793	0.226615	0.644712		21.9	2	2	1.18111	1.08387	0.0349772	1.8107	2	21.9	2	2	0.75175	0.94199	-0.0259537	2.9294	2	12.3	1	1	0.79746	1.1624	0.0653556	NaN	1
	1444	Tb927.4.2060	Tb927.4.2060		hypothetical protein, conserved	66.835	6	0	7.837	1		1.05821	0.0245732	0.227354	0.643298		4.6	3	3	1.083	0.983091	-0.00740637	17.319	3	6	4	4	0.95667	1.1957	0.0776222	22.864	4	1.2	1	1	0.7003	1.0081	0.00350361	NaN	1
	1149	Tb927.11.9190	Tb927.11.9190		protein kinase, putative	150.6	5.9	0	13.406	1		1.2084	0.0822109	0.229622	0.638987		1.6	2	2	1.99215	1.82922	0.262267	48.703	2	3.4	3	3	0.75389	0.94945	-0.0225279	46.082	3	3.2	3	3	0.71211	1.016	0.00689371	18.168	3
	1872	Tb927.7.330	Tb927.7.330		hypothetical protein	21.139	21.8	0	18.64	1		1.19732	0.0782117	0.229674	0.638888		21.8	5	5	1.10102	1.01382	0.00596	12.119	6	21.8	5	5	0.7557	0.95293	-0.020939	2.4466	5	7.3	2	2	1.232	1.7767	0.249614	69.493	2
	2107	Tb927.8.5280	Tb927.8.5280		hypothetical protein, conserved	28.693	45.9	0	32.761	1	1	1.07301	0.0306055	0.23004	0.638197		34.6	6	6	1.34924	1.244	0.0948197	16.382	5	35.4	5	5	0.83102	1.0386	0.0164483	26.749	5	39.7	6	6	0.66123	0.9562	-0.0194513	33.639	6
	754	Tb927.11.11380	Tb927.11.11380		hypothetical protein, conserved	61.504	30.5	0	146.75	1	1	1.03017	0.0129082	0.230811	0.636743		30.5	14	14	1.05868	0.969838	-0.0133008	20.477	20	28.4	12	12	0.82919	1.0379	0.0161555	12.042	15	19.1	8	8	0.74662	1.0861	0.0358698	14.972	11
	1750	Tb927.6.4260	Tb927.6.4260		hypothetical protein, conserved	34.251	5	0	14.269	1		1.18909	0.0752148	0.230823	0.636721		5	1	1	1.53617	1.38635	0.141872	NaN	1	5	1	1	0.81632	1.0199	0.00855759	NaN	1	0	0	0	NaN	NaN		NaN	0
	1313	Tb927.3.2430	Tb927.3.2430		hypothetical protein, conserved	103.07	4.8	0	7.8924	1		1.05398	0.0228307	0.231922	0.634657		2	1	1	1.07577	1.00567	0.00245636	NaN	1	3.6	2	2	0.90065	1.1046	0.043205	38.934	3	1.2	1	1	NaN	NaN		NaN	0
	283	Tb927.1.640	Tb927.1.640		BRCA2	176.31	6	0	45.417	1		1.29442	0.112076	0.232057	0.634404		4.9	6	6	1.15772	1.06935	0.0291187	22.282	6	6	7	7	0.71449	0.89038	-0.0504246	58.673	6	1.8	2	2	1.5549	2.2779	0.357535	86.99	2
	392	Tb927.10.13510	Tb927.10.13510		zinc metallopeptidase, putative	62.779	10.2	0	47.27	1	1	1.01975	0.00849324	0.23303	0.632588		10.2	4	4	1.12147	1.0248	0.0106391	9.5808	5	8.3	3	3	0.7772	0.97961	-0.00894679	8.7141	4	3.2	1	1	0.73977	1.0563	0.0237873	5.9813	3
	2355	Tb927.9.4930	Tb927.9.4930		hypothetical protein, conserved	45.747	30.3	0	147.72	1		1.06303	0.0265443	0.23305	0.632551		25.7	7	7	1.15047	1.04271	0.0181631	13.91	9	23.7	6	6	0.76473	0.95447	-0.0202377	19.353	10	28.4	8	8	0.8315	1.207	0.0817073	15.502	10
	2061	Tb927.8.3140	Tb927.8.3140		NAD dependent deacetylase, putative,SIR2-like protein 4, putative,NAD-dependent deacetylase sirtuin 4, putative	33.545	6.5	0.0014164	3.209	1		1.09526	0.0395175	0.233914	0.630944		6.5	1	1	1.34765	1.18913	0.0752297	NaN	1	0	0	0	NaN	NaN		NaN	0	6.5	1	1	0.69269	1.0088	0.00380507	NaN	1
	1526	Tb927.4.600	Tb927.4.600		hypothetical protein, conserved	34.458	43.2	0	96.174	1	1	1.01805	0.00776884	0.233972	0.630836		43.2	9	9	1.15338	1.05858	0.0247245	6.2067	11	40.7	8	8	0.78395	0.98991	-0.00440429	9.1754	10	43.2	9	9	0.69502	1.0069	0.00298634	19.301	12
	496	Tb927.10.2610	Tb927.10.2610		hypothetical protein, conserved	54.358	26	0	66.329	1		1.00917	0.00396437	0.234918	0.629083		26	9	9	1.09702	0.998004	-0.000867718	34.015	13	19.4	7	7	0.78861	0.99963	-0.000160719	42.109	8	15.1	4	4	0.71128	1.0302	0.0129215	1.7043	5
	2140	Tb927.8.6380	Tb927.8.6380		hypothetical protein, conserved	29.908	13.5	0	12.8	1		1.08323	0.0347219	0.234925	0.629071		13.5	3	3	1.03454	0.941797	-0.0260427	8.9336	3	13.5	3	3	1.0146	1.2829	0.108193	9.2381	3	7.1	2	2	0.72598	1.052	0.0220157	1.0935	2
	546	Tb927.10.4130	Tb927.10.4130		NDUFA5/B13 subunit, putative	31.032	27.5	0	55.125	1	1	1.01755	0.00755595	0.235288	0.6284		27.5	8	8	1.15662	1.05814	0.0245452	3.7663	9	27.5	8	8	0.79016	0.9936	-0.00278842	6.8432	9	19.6	5	5	0.69736	1.0021	0.000911062	10.337	6
	1687	Tb927.6.2230	Tb927.6.2230		RGG protein	86.64	19.2	0	53.353	1	1	1.04477	0.019019	0.236866	0.625497		17.7	11	11	1.0361	0.946432	-0.0239106	16.537	13	17.7	11	11	0.86013	1.083	0.0346285	6.697	12	11	6	6	0.76502	1.1126	0.0463391	14.456	6
	370	Tb927.10.12880	Tb927.10.12880		hypothetical protein, conserved	48.422	7.5	0	20.008	1		1.01098	0.00474458	0.237959	0.623497		7.5	2	2	1.11982	1.00912	0.00394367	3.642	3	5	1	1	0.78833	0.99021	-0.00427269	NaN	1	5	1	1	0.70879	1.0341	0.0145625	NaN	1
	2394	Tb927.9.7170	Tb927.9.7170		hypothetical protein, conserved	53.98	38.6	0	109.4	1	1	1.05383	0.022772	0.238101	0.623239		28.9	11	11	1.08421	0.991867	-0.00354673	22.572	11	24.4	9	9	0.79335	0.99247	-0.00328261	19.765	9	31.6	8	8	0.8163	1.1889	0.0751453	27.355	8
	1458	Tb927.4.2500	Tb927.4.2500		protein kinase, putative,eukaryotic translation initiation factor 2-alpha kinase precursor, putative	111.92	45.3	0	323.31	1		1.02077	0.00892755	0.238329	0.622823		45.1	35	35	1.05986	0.97371	-0.0115704	8.5773	54	44.4	35	35	0.82852	1.0419	0.017826	6.7356	53	36.1	29	29	0.71894	1.0484	0.020527	7.2272	53
	2396	Tb927.9.7200	Tb927.9.7200		hypothetical protein, conserved	33.696	33.2	0	22.608	1		1.04024	0.0171315	0.238586	0.622356		27.7	6	6	1.23388	1.10796	0.0445241	16.897	5	24.9	6	6	0.82994	1.0668	0.028083	10.505	6	25.3	5	5	0.64756	0.95233	-0.0212125	26.42	7
	130	Tb927.7.4890;Tb11.v5.0170	Tb927.7.4890;Tb11.v5.0170		hypothetical protein, conserved;hypothetical protein, conserved	92.655	9	0	12.95	2		1.07013	0.0294361	0.239474	0.620742		4.3	3	3	0.999101	0.918611	-0.0368684	11.074	3	4.7	3	3	0.9475	1.1923	0.0763855	7.9658	3	1.9	1	1	0.76207	1.1189	0.0487913	NaN	1
	2119	Tb927.8.5640	Tb927.8.5640		hypothetical protein, conserved	37.089	36	0	178.94	1	1	1.02278	0.00978399	0.239524	0.620652		17.7	5	5	1.09635	1.00438	0.00189762	16.048	9	35.7	7	7	0.8611	1.0768	0.032135	69.915	9	24	5	5	0.6832	0.98928	-0.00468077	20.831	7
	1319	Tb927.3.2670	Tb927.3.2670		hypothetical protein, conserved	28.84	37.2	0	38.003	1	1	1.18242	0.0727721	0.240014	0.619763		37.2	7	7	1.00864	0.921914	-0.0353096	22.462	8	29	5	5	0.81792	1.0333	0.0142264	23.317	6	4.8	1	1	1.1895	1.7354	0.2394	NaN	1
	1362	Tb927.3.4270	Tb927.3.4270		hypothetical protein, conserved	99.496	12	0	84.084	1		1.05122	0.021692	0.240044	0.61971		8.8	5	5	1.22846	1.08134	0.0339615	9.7012	5	11.2	5	5	0.74241	0.9402	-0.0267798	32.749	5	11.2	5	5	0.77592	1.1426	0.0578942	19.847	5
	797	Tb927.11.13010	Tb927.11.13010		hypothetical protein	22.171	15.3	0	11.248	1		1.09703	0.0402169	0.240134	0.619547		15.3	3	3	0.997506	0.925669	-0.0335444	18.486	4	15.3	2	2	1.0361	1.3392	0.126845	55.586	3	8.2	1	1	0.71705	1.065	0.0273496	NaN	1
	522	Tb927.10.3480	Tb927.10.3480		hypothetical protein, conserved	76.27	16	0	43.908	1		1.05665	0.023933	0.242194	0.615836		10.9	5	5	1.30112	1.19778	0.078376	22.282	5	8.7	4	4	0.82544	1.0208	0.00894066	1.8001	5	12.8	5	5	0.66346	0.9649	-0.0155177	14.827	7
	1881	Tb927.7.3630	Tb927.7.3630		TPR-repeat-containing chaperone protein DNAJ, putative	60.135	12.7	0	37.197	1		1.09809	0.0406397	0.242275	0.615691		3.4	1	1	1.26427	1.18033	0.0720038	NaN	1	12.7	4	4	1.001	1.268	0.103119	3.7917	4	5.9	2	2	0.61409	0.8847	-0.053204	36.188	2
	1827	Tb927.7.2070	Tb927.7.2070		heat shock protein DNAJ, putative	36.377	5.5	0.0035461	2.4634	1	1	1.08627	0.0359379	0.242535	0.615225		3.4	1	1	1.24409	1.17552	0.0702285	NaN	1	2.1	1	1	0.80714	1.0038	0.00164719	NaN	1	0	0	0	NaN	NaN		NaN	0
	1046	Tb927.11.5360	Tb927.11.5360		aldo/keto reductase, putative	35.116	22.1	0	10.932	1		1.08023	0.033515	0.2432	0.614036		9	2	2	1.36664	1.25419	0.0983619	72.077	2	13.1	3	3	0.87527	1.0976	0.0404441	17.975	3	19.2	4	4	0.62877	0.91567	-0.038261	8.9795	4
	1370	Tb927.3.4700	Tb927.3.4700		hypothetical protein, conserved	42.179	8.9	0	7.4974	1		1.03673	0.0156641	0.243247	0.613953		8.9	2	2	1.19781	1.07319	0.0306774	1.4357	2	4.2	1	1	0.79688	1.0015	0.000650954	NaN	1	0	0	0	NaN	NaN		NaN	0
	1503	Tb927.4.4310	Tb927.4.4310	TbNup64	Nucleoporin (TbNup64)	64.234	24.7	0	95.886	1		1.0143	0.00616822	0.243272	0.613908		22.5	13	12	1.06496	0.981066	-0.008302	8.2897	14	22.2	12	11	0.80676	1.0277	0.0118664	12.84	14	18.6	10	9	0.71041	1.035	0.0149403	21.251	10
	114	Tb11.02.5105b;Tb11.02.5105	Tb11.02.5105b;Tb11.02.5105		hypothetical protein, conserved;hypothetical protein, conserved	14.971	14.6	0	4.2809	2	1	1.14713	0.0596129	0.243416	0.613651		14.6	2	2	1.68748	1.55304	0.191182	20.899	2	6.9	1	1	0.70483	0.89107	-0.0500882	NaN	1	14.6	2	2	0.75023	1.0908	0.0377451	5.1181	2
	2399	Tb927.9.7470	Tb927.9.7470	NT10	purine nucleoside transporter (NT10)	50.675	18.8	0	212.41	1		1.0413	0.0175775	0.243711	0.613125		16.2	5	5	1.26397	1.14172	0.0575604	7.9709	5	18.8	7	7	0.76334	0.97165	-0.0124901	13.616	7	16.2	5	5	0.70649	1.0178	0.00766245	6.8727	5
	1500	Tb927.4.4210	Tb927.4.4210		ATP-dependent zinc metallopeptidase, putative,metallo-peptidase, Clan MA(E) Family M41	96.221	21.3	0	186.81	1	1	1.02348	0.0100784	0.245597	0.609777		16.2	10	10	1.11961	0.998502	-0.00065093	7.4228	10	17.6	11	11	0.79112	0.99252	-0.00326073	16.556	11	11.2	7	7	0.74876	1.0818	0.034147	13.266	7
	1869	Tb927.7.3270	Tb927.7.3270		hypothetical protein, conserved	90.386	39.2	0	161.42	1	1	1.01529	0.00658971	0.245937	0.609176		37.3	23	23	1.11633	1.01638	0.00705782	16.825	25	27.5	16	16	0.75454	0.98329	-0.00731838	21.376	20	26.9	15	15	0.72519	1.0472	0.0200296	11.157	17
	1092	Tb927.11.6660	Tb927.11.6660		hypothetical protein, conserved	103.55	16.1	0	92.349	1	1	1.0166	0.00714984	0.246036	0.609001		13.6	8	8	1.06927	0.980584	-0.00851498	9.7863	8	12.5	8	8	0.83868	1.0496	0.0210238	25.826	9	12.8	8	8	0.69386	1.0208	0.00894066	13.759	9
	1702	Tb927.6.2600	Tb927.6.2600		hypothetical protein, conserved	16.11	11.2	0	10.972	1		1.29961	0.113812	0.246342	0.608461		11.2	2	2	0.763301	0.693049	-0.159236	124.52	2	11.2	1	1	1.4337	1.8301	0.262475	NaN	1	11.2	1	1	1.1767	1.7306	0.238197	3.3411	2
	2151	Tb927.8.6620	Tb927.8.6620		hypothetical protein, conserved	40.12	8.1	0.0084175	2.0201	1		1.24431	0.094929	0.246401	0.608358		5.1	1	1	1.7438	1.54076	0.187735	NaN	1	0	0	0	NaN	NaN		NaN	0	3	1	1	0.68364	1.0049	0.00212285	NaN	1
	1987	Tb927.7.7460	Tb927.7.7460		hypothetical protein, conserved	22.358	41.1	0	18.824	1		1.07074	0.0296838	0.248111	0.605353		28.1	5	5	1.11424	1.00988	0.00426848	6.2388	6	41.1	7	7	0.78802	0.96398	-0.015932	8.6746	5	10.9	2	2	0.87334	1.261	0.100715	27.319	2
	1172	Tb927.11.970	Tb927.11.970		hypothetical protein, conserved	23.691	50.2	0	49.262	1		1.0285	0.0122038	0.249539	0.602862		24.2	4	4	1.18673	1.10146	0.0419668	9.4443	7	38.9	5	5	0.79697	0.9975	-0.0010871	7.5689	6	35.5	6	6	0.67365	0.99022	-0.00426831	9.0776	9
	1482	Tb927.4.3660	Tb927.4.3660		hypothetical protein, conserved	54.816	20.2	0	21.608	1		1.02768	0.0118561	0.249833	0.60235		20.2	8	8	1.08709	0.980296	-0.00864273	17.593	8	12.1	5	5	0.86995	1.0962	0.0398898	13.639	5	15	5	5	0.70132	1.01	0.00432137	5.1799	5
	816	Tb927.11.13580	Tb927.11.13580		ubiquinone biosynthesis protein-like protein	27.93	26.5	0	37.524	1	1	1.04169	0.0177385	0.249888	0.602254		26.5	5	5	1.07049	0.984543	-0.00676544	6.7206	8	23.3	4	4	0.79649	0.99757	-0.00105662	11.804	5	22.5	4	4	0.79204	1.1509	0.0610376	34.056	4
	1553	Tb927.5.1510	Tb927.5.1510		hypothetical protein, conserved	35.464	18.6	0	18.3	1	1	1.06528	0.0274647	0.250368	0.601422		18.6	4	4	1.02134	0.927644	-0.0326188	16.787	4	15.1	3	3	0.95731	1.2133	0.0839682	28.292	3	14.7	3	3	0.75803	1.0741	0.0310447	8.9189	3
	152	Tb927.10.15940;Tb11.v5.0304	Tb927.10.15940;Tb11.v5.0304		cation transporter, putative;cation transporter, putative	40.114	11.2	0	10.242	2		1.08164	0.0340828	0.251182	0.600012		8.2	3	3	1.35724	1.26437	0.101873	19.31	3	6.6	2	2	0.71861	0.90617	-0.0427903	16.959	2	6.6	2	2	0.76196	1.1045	0.0431657	NaN	1
	1964	Tb927.7.6660	Tb927.7.6660		chaperone protein DNAj, putative	29.887	26.5	0	92.042	1	1	1.04205	0.0178906	0.251336	0.599745		26.5	5	5	1.05102	0.960892	-0.0173256	3.8885	6	23.7	4	4	0.82048	1.0291	0.0124576	11.527	6	19.8	3	3	0.79265	1.1443	0.0585399	34.131	5
	2110	Tb927.8.5420	Tb927.8.5420		hypothetical protein, conserved	46.375	10.9	0	6.0327	1	1	1.10622	0.0438406	0.251418	0.599604		8.7	2	2	1.02102	0.937822	-0.0278794	8.0045	2	10.9	3	3	0.83371	1.0222	0.00953588	25.879	3	10.9	3	3	0.97812	1.4121	0.149865	54.597	3
	1300	Tb927.3.2090;Tb11.v5.0697	Tb927.3.2090;Tb11.v5.0697		aminopeptidase P1, putative,metallo-peptidase, Clan MG, Family M24;aminopeptidase P1, putative	68.387	41.1	0	117.7	2		1.01659	0.00714711	0.251451	0.599546		38.5	16	16	1.14405	1.04838	0.02052	7.9872	21	32.7	14	14	0.81821	1.0243	0.0104272	22.685	16	33.8	13	13	0.68183	0.97835	-0.00950575	15.907	12
	2052	Tb927.8.2840	Tb927.8.2840		hypothetical protein, conserved	51.35	15.5	0	26.608	1		1.05004	0.0212078	0.251778	0.598982		15.5	4	4	1.04438	0.954016	-0.0204442	27.787	4	6	2	2	0.94461	1.1739	0.0696311	35.586	2	7.2	2	2	0.70618	1.0338	0.0144365	4.9304	2
	944	Tb927.11.2300	Tb927.11.2300	ERF1	eukaryotic peptide chain release factor subunit 1, putative (ERF1)	50.976	20.4	0	25.408	1		1.16618	0.0667641	0.252684	0.597421		11.5	3	3	1.12184	1.02466	0.0105815	12.891	3	17.5	4	4	0.71909	0.91132	-0.0403291	23.776	4	2.9	1	1	1.1498	1.6984	0.23004	NaN	1
	570	Tb927.10.5120	Tb927.10.5120	KREPA6	KREPA6 (KREPA6)	18.09	23.8	0	14.048	1	1	1.07317	0.0306695	0.252962	0.596945		17.1	3	3	1.01229	0.936154	-0.0286526	19.747	3	23.8	4	4	0.83387	1.0441	0.0187421	23.531	3	10.4	2	2	0.86693	1.2645	0.101919	28.617	2
	1885	Tb927.7.3810	Tb927.7.3810		hypothetical protein, conserved	41.685	16.8	0	50.875	1	1	1.05016	0.0212537	0.253646	0.595772		16.8	5	5	1.01067	0.929714	-0.0316508	7.0603	5	16.8	5	5	0.88774	1.1064	0.0439122	14.808	5	7.3	2	2	0.78465	1.1259	0.0514998	NaN	1
	1142	Tb927.11.8970	Tb927.11.8970		ribose 5-phosphate isomerase, putative	16.957	31	0	6.8822	1		1.02377	0.0102003	0.25434	0.594585		31	3	3	1.18694	1.08064	0.0336798	23.794	3	23.2	2	2	0.81413	1.0168	0.00723554	22.487	2	23.2	2	2	0.67058	0.97653	-0.0103144	9.1355	3
	2356	Tb927.9.5000	Tb927.9.5000		hypothetical protein, conserved	31.326	26.3	0	13.59	1	1	1.05424	0.0229398	0.256415	0.591056		10.6	2	2	1.18294	1.10424	0.0430635	8.3231	2	6.2	1	1	0.73343	0.9239	-0.034375	NaN	1	15.7	2	2	0.79175	1.1485	0.060131	32.607	2
	276	Tb927.1.4490	Tb927.1.4490		acetyltransferase, putative	19.682	12.8	0	15.47	1		1.02519	0.0108056	0.256585	0.590768		12.8	2	2	1.04485	0.96432	-0.0157787	5.1882	2	12.8	2	2	0.83133	1.043	0.0182843	3.2897	2	7.6	1	1	0.7462	1.0713	0.0299111	NaN	1
	2281	Tb927.9.14100	Tb927.9.14100		hypothetical protein, conserved	34.916	4.1	0.0035571	2.4976	1		1.19255	0.0764777	0.257157	0.589801		4.1	1	1	1.56336	1.43375	0.156474	NaN	1	0	0	0	NaN	NaN		NaN	0	4.1	1	1	0.68058	0.99193	-0.00351897	NaN	1
	906	Tb927.11.16580	Tb927.11.16580		hypothetical protein, conserved	64.203	14.2	0	19.49	1		1.19733	0.0782126	0.259467	0.585918		12.2	6	6	1.83026	1.66681	0.221885	57.406	6	12.2	6	6	1.0768	1.3453	0.128819	50.087	6	7.4	4	4	0.53116	0.76548	-0.116066	64.694	4
	1669	Tb927.6.1680	Tb927.6.1680	MRB1680	mitochondrial RNA binding protein 1 (MRB1680)	58.05	5.5	0	5.3284	1	1	1.04428	0.0188184	0.260807	0.58368		1.5	1	1	1.08093	0.98068	-0.00847246	NaN	1	1.5	1	1	0.79412	0.99397	-0.00262672	NaN	1	5.5	3	3	0.82794	1.1683	0.0675544	12.542	3
	2016	Tb927.8.1720	Tb927.8.1720	pgps	phosphatidylglycerophosphate synthase, putative	68.119	7.5	0	8.0819	1		1.04169	0.0177391	0.261214	0.583003		7.5	4	4	1.17895	1.08836	0.0367742	48.276	4	0	0	0	NaN	NaN		NaN	0	2	1	1	0.68808	0.99702	-0.00129613	NaN	1
	1489	Tb927.4.3800	Tb927.4.3800		hypothetical protein, conserved	35.891	42.5	0	118.82	1	1	1.04502	0.0191247	0.262713	0.580518		40.1	11	3	1.13713	1.02229	0.00957241	11.401	4	40.1	11	3	0.75492	0.95775	-0.0187478	13.005	4	37	9	1	0.80485	1.1656	0.0665495	3.3601	2
	1161	Tb927.11.9530	Tb927.11.9530		14-3-3-I protein	30.31	15.6	0	8.583	1		1.04359	0.0185291	0.262729	0.580492		11.1	2	2	1.19928	1.09296	0.0386027	NaN	1	10.7	2	2	0.79196	0.99645	-0.00154449	NaN	1	0	0	0	NaN	NaN		NaN	0
	1160	Tb927.11.9510	Tb927.11.9510		nucleic acid binding protein, putative	56.606	31.6	0	72.803	1		1.0256	0.0109791	0.263731	0.578839		19.2	8	8	1.08723	0.984834	-0.00663719	6.3195	10	19	8	8	0.80999	0.99973	-0.000117275	9.0737	8	19.6	6	6	0.75184	1.0957	0.0396917	26.379	5
	1818	Tb927.7.1640	Tb927.7.1640	TbEAR	ras-like small GTPase, putative (TbEAR)	65.504	10.8	0	16.549	1	1	1.035	0.0149392	0.264267	0.577958		9.4	5	5	1.04464	0.953198	-0.0208169	8.8861	5	6.2	4	4	0.83427	1.0429	0.0182427	13.735	4	3.5	2	2	0.77107	1.1153	0.0473917	12.162	2
	1696	Tb927.6.2480	Tb927.6.2480		chaperone protein DNAj, putative	38.896	13.6	0	5.6181	1		1.05649	0.0238635	0.26512	0.576557		13.6	3	3	1.09139	0.99453	-0.00238207	8.5841	3	9.6	2	2	0.86382	1.1223	0.050109	NaN	1	0	0	0	NaN	NaN		NaN	0
	2386	Tb927.9.6650	Tb927.9.6650		hypothetical protein, conserved	52.057	42.7	0	72.424	1		1.03106	0.0132856	0.266268	0.574681		29.9	9	9	1.0671	0.981066	-0.008302	24.633	10	21.6	6	6	0.89847	1.1182	0.0485195	34.781	7	27.8	8	8	0.68991	0.99917	-0.000360614	34.259	9
	926	Tb927.11.1710	Tb927.11.1710	GBP21	mitochondrial RNA binding protein 1,gBP21, MRP1 (GBP21)	23.253	35.9	0	50.37	1	1	1.00993	0.0042894	0.267786	0.572213		35.9	8	8	1.1061	0.989315	-0.00466523	17.126	9	35.9	8	8	0.83967	1.0354	0.0151082	27.27	9	24.8	4	4	0.69747	1.0056	0.00242526	14.298	5
	1173	Tb927.11.9700	Tb927.11.9700		nascent polypeptide associated complex alpha subunit, putative	11.406	27.7	0	10.585	1		1.1028	0.0424972	0.26802	0.571833		27.7	2	2	0.948137	0.852297	-0.0694091	2.6888	2	27.7	2	2	0.9492	1.1925	0.0764584	0.0095571	2	15.8	1	1	0.90451	1.3196	0.120442	NaN	1
	2274	Tb927.9.1380	Tb927.9.1380		hypothetical protein, conserved	42.439	45.6	0	76.416	1	1	1.01442	0.00621651	0.268527	0.571012		38	12	12	1.11846	1.01971	0.0084771	24.507	12	29.8	8	8	0.84118	1.046	0.0195317	5.5006	8	27.2	8	8	0.6816	0.97868	-0.00935929	12.267	7
	2190	Tb927.8.8180;Tb927.4.4150	Tb927.8.8180;Tb927.4.4150	MRB4150;MRB8180	mitochondrial RNA binding complex 1 subunit (MRB8180);mitochondrial RNA binding complex 1 subunit (MRB4150)	103.45	14.9	0	58.249	2		1.02196	0.00943498	0.269312	0.569744		14.1	11	11	1.07228	0.972668	-0.0120354	7.9134	12	13.3	11	11	0.81354	1.0186	0.00800367	12.478	13	8.8	6	6	0.74449	1.0773	0.0323367	10.043	6
	710	Tb927.11.10080	Tb927.11.10080		hypothetical protein, conserved	21.564	18	0	10.914	1	1	1.11201	0.0461089	0.269898	0.5688		18	2	2	0.965904	0.893096	-0.0491017	NaN	1	12.2	1	1	1.175	1.4619	0.164918	NaN	1	12.2	1	1	0.72909	1.0532	0.0225109	NaN	1
	408	Tb927.10.14030	Tb927.10.14030		hypothetical protein, conserved	50.474	10	0	11.264	1		1.09099	0.0378202	0.269901	0.568795		5.3	2	2	0.958865	0.867002	-0.0619799	3.1762	2	5.3	2	2	0.92174	1.1615	0.0650192	6.2104	2	8	3	3	0.88378	1.2895	0.110421	15.209	3
	1387	Tb927.3.5240	Tb927.3.5240		hypothetical protein, conserved	66.655	8.3	0	8.1812	1	1	1.24721	0.095939	0.270704	0.567506		5.3	2	2	0.949217	0.851426	-0.069853	NaN	1	2.9	1	1	0.79755	1.0049	0.00212285	NaN	1	3.4	1	1	1.5542	2.2675	0.355547	NaN	1
	2362	Tb927.9.5320	Tb927.9.5320		nucleolar RNA binding protein, putative	46.864	28.8	0	71.915	1		1.03169	0.0135474	0.271016	0.567006		22	6	6	1.1319	1.03057	0.0130762	17.672	6	19.9	6	6	0.88486	1.1117	0.0459876	17.799	6	13.1	4	4	0.65997	0.95847	-0.0184215	24.29	4
	1349	Tb927.3.3780;Tb927.3.3760	Tb927.3.3780;Tb927.3.3760	TXN1b;TXN1a	tryparedoxin;tryparedoxin (TRYP1)	15.891	52.1	0	40.775	2	1	1.01569	0.0067624	0.271209	0.566696		52.1	5	5	1.15959	1.05517	0.0233245	14.214	4	43.8	4	4	0.80903	1.0134	0.0057809	15.628	3	52.1	5	5	0.6789	0.9799	-0.00881824	13.347	4
	1314	Tb927.3.2460	Tb927.3.2460		hypothetical protein, conserved	37.373	7.5	0.0099792	1.9468	1		1.17569	0.0702939	0.272158	0.56518		0	0	0	NaN	NaN		NaN	0	7.5	1	1	1.121	1.4162	0.151125	NaN	1	7.5	1	1	0.67838	0.97603	-0.0105368	NaN	1
	2411	Tb927.9.8420;Tb927.9.8070	Tb927.9.8420;Tb927.9.8070	QM	60S ribosomal protein L10, putative,QM-like protein;60S ribosomal protein L10, putative,QM-like protein (QM)	24.736	13.6	0	14.112	2		1.25251	0.0977819	0.272514	0.564611		13.6	2	2	0.776578	0.704077	-0.15238	80.798	2	13.6	2	2	1.0851	1.3595	0.133379	64.87	2	13.6	2	2	1.4097	2.0528	0.312347	NaN	1
	1952	Tb927.7.6180	Tb927.7.6180		hypothetical protein, conserved	29.957	34.9	0	59.5	1		1.00857	0.00370553	0.272705	0.564308		20.9	4	4	1.08207	0.985028	-0.0065516	6.9658	5	26.3	4	4	0.81702	1.0196	0.00842983	22.841	5	16.5	3	3	0.70016	1.0215	0.00923837	9.5351	5
	1609	Tb927.5.3450	Tb927.5.3450		hypothetical protein, conserved	57.992	11.4	0	18.894	1		1.06962	0.02923	0.272836	0.564099		7.2	3	3	0.974279	0.887705	-0.0517312	13.567	3	9.7	4	4	0.92453	1.1651	0.0663632	10.138	4	7.8	3	3	0.81644	1.1832	0.0730582	11.001	4
	964	Tb927.11.2910	Tb927.11.2910	iPGAM	phosphoglycerate mutase, putative (iPGAM)	43.738	22.5	0	41.752	1	1	1.06741	0.0283294	0.273431	0.563153		17.5	6	6	0.977135	0.890551	-0.0503411	19.56	7	14.6	4	4	0.93839	1.1798	0.0718084	22.212	5	14.6	4	4	0.77629	1.1575	0.063521	27.663	5
	1582	Tb927.5.2420	Tb927.5.2420		hypothetical protein, conserved	102.77	5.7	0	7.1055	1	1	1.7821	0.250932	0.274482	0.561486		5.7	3	3	0.988435	0.908018	-0.0419056	63.195	3	1.5	1	1	2.771	3.4976	0.54377	NaN	1	0	0	0	NaN	NaN		NaN	0
	1200	Tb927.2.2450	Tb927.2.2450		ribosomal RNA methyltransferase, putative	46.895	5.1	0	4.0508	1		1.0677	0.0284482	0.274747	0.561067		2.8	1	1	1.39388	1.27644	0.106	NaN	1	5.1	2	2	0.75312	0.94113	-0.0263504	22.648	2	2.8	1	1	0.70238	1.0132	0.00569518	NaN	1
	2271	Tb927.9.13630	Tb927.9.13630		hypothetical protein, conserved	40.44	16.1	0	25.409	1	1	1.04523	0.019212	0.274828	0.56094		16.1	4	4	1.03261	0.932575	-0.0303163	3.1522	4	11.3	3	3	0.90643	1.1543	0.0623187	5.4944	2	7.8	2	2	0.72092	1.0608	0.0256335	13.194	3
	2051	Tb927.8.2830	Tb927.8.2830		hypothetical protein, conserved	26.237	27.4	0	15.603	1		1.12913	0.0527434	0.275178	0.560387		22.8	4	4	0.984834	0.897183	-0.047119	12.612	3	20.7	4	4	0.80437	1.0183	0.00787574	21.328	4	12.2	2	2	1.0773	1.5757	0.197474	57.971	2
	706	Tb927.11.10020	Tb927.11.10020		short-chain dehydrogenase, putative	33.958	24.6	0	46.25	1		1.03066	0.013114	0.275324	0.560155		17.6	4	4	1.05042	0.954927	-0.0200296	13.708	5	21.4	5	5	0.82491	1.0368	0.015695	15.926	6	21.4	5	5	0.75588	1.1058	0.0436766	8.3937	6
	491	Tb927.10.2480	Tb927.10.2480		hypothetical protein, conserved	105.08	5.1	0	20.46	1		1.10638	0.043904	0.276702	0.557988		3.7	3	3	1.02883	0.94518	-0.0244857	12.893	2	3.7	3	3	0.79142	0.973	-0.0118872	NaN	1	2.2	2	2	1.024	1.4726	0.168085	35.628	2
	1159	Tb927.11.9490	Tb927.11.9490		hypothetical protein, conserved	38.123	5.8	0	7.7499	1		1.05917	0.0249646	0.276856	0.557746		5.8	1	1	1.06806	1.00427	0.00184962	NaN	1	5.8	1	1	0.77184	0.95186	-0.0214269	NaN	1	5.8	1	1	0.84976	1.243	0.0944711	NaN	1
	1910	Tb927.7.4430	Tb927.7.4430		hypothetical protein, conserved	25.549	12.7	0	12.677	1	1	1.25456	0.0984915	0.276907	0.557667		12.7	3	3	1.79314	1.64142	0.215219	63.587	2	9.2	2	2	0.76186	0.95888	-0.0182357	NaN	1	0	0	0	NaN	NaN		NaN	0
	2018	Tb927.8.1820	Tb927.8.1820		nonspecific lipid-transfer protein, putative,sterol carrier protein, putative	43.439	34	0	68.267	1	1	1.01287	0.00555485	0.277153	0.55728		33.7	9	9	1.14601	1.05028	0.0213039	7.287	12	33.7	9	9	0.79127	0.99659	-0.00148347	18.115	10	32	9	9	0.69005	0.99276	-0.00315573	10.724	11
	387	Tb927.10.13360	Tb927.10.13360	EF-Tu	elongation factor Tu, putative	51.849	40.2	0	133.09	1	1	1.01005	0.00434335	0.277579	0.556614		26.4	11	11	1.11896	1.0122	0.00526505	12.102	11	24.7	9	9	0.78103	0.98447	-0.00679751	14.973	9	31.1	13	13	0.71744	1.0341	0.0145625	20.607	14
	903	Tb927.11.16510	Tb927.11.16510		hypothetical protein, conserved	16.327	18.5	0	5.0864	1	1	1.03226	0.0137901	0.278617	0.554993		18.5	2	2	1.02816	0.942596	-0.0256744	12.486	2	18.5	2	2	0.86307	1.0835	0.0348289	0.065923	2	9.6	1	1	0.74569	1.077	0.0322157	NaN	1
	961	Tb927.11.2810	Tb927.11.2810		hypothetical protein, conserved	28.442	6	0.0014409	3.5577	1		1.16779	0.0673647	0.279095	0.554248		6	1	1	1.05587	0.96918	-0.0135956	NaN	1	6	1	1	NaN	NaN		NaN	0	6	1	1	0.97771	1.4071	0.148325	NaN	1
	2262	Tb927.9.13380	Tb927.9.13380		phosphoinositide-binding protein, putative	48.172	9.8	0	15.682	1		1.20381	0.0805572	0.279151	0.554161		6.4	2	2	1.63255	1.50455	0.177407	NaN	1	4.5	1	1	NaN	NaN		NaN	0	7.9	2	2	0.6703	0.96318	-0.0162925	NaN	1
	1010	Tb927.11.4280	Tb927.11.4280		hypothetical protein, conserved	156.27	5.4	0	56.066	1		1.50764	0.178299	0.279427	0.553732		2	2	2	1.17086	1.08482	0.0353585	7.7829	2	3.7	3	3	3.7599	4.7469	0.67641	101.22	3	1	1	1	0.46605	0.66547	-0.176872	NaN	1
	193	Tb927.7.2570;Tb11.v5.0611	Tb927.7.2570;Tb11.v5.0611		guide RNA associated protein, GAP2;hypothetical protein, conserved	52.545	45.2	0	161.71	2	1	1.02312	0.00992755	0.280348	0.552302		45	17	17	1.04156	0.958589	-0.0183676	24.19	19	43.1	16	16	0.82305	1.0468	0.0198637	22.146	16	38.7	13	13	0.73281	1.0673	0.0282865	18.994	14
	486	Tb927.10.2320	Tb927.10.2320		hypothetical protein, conserved	41.178	20.5	0	131.61	1		1.01003	0.00433466	0.281163	0.551042		16.3	4	4	1.11035	1.0337	0.0143941	5.5007	7	20.5	5	5	0.8131	1.0136	0.0058666	15.986	6	16.3	4	4	0.68073	0.98343	-0.00725655	23.866	7
	619	Tb927.10.7060	Tb927.10.7060		nucleoporin interacting component (NUP93), putative	96.511	32.8	0	159.64	1		1.02424	0.0104025	0.281256	0.550899		18.3	12	12	1.07536	0.978186	-0.00957838	15.969	13	26.6	14	14	0.87262	1.0966	0.0400482	13.076	15	23.1	14	14	0.69407	1.0017	0.000737674	16.527	18
	1068	Tb927.11.5990	Tb927.11.5990		hypothetical protein, conserved	69.307	19.5	0	34.837	1	1	1.03187	0.013624	0.281422	0.550643		15.7	7	7	1.13589	1.035	0.014942	14.952	8	12.7	7	7	0.89356	1.115	0.0472749	11.4	7	12.3	5	5	0.65019	0.95204	-0.0213448	14.049	5
	846	Tb927.11.14590	Tb927.11.14590	G5-IP	hypothetical protein, conserved	70.339	7	0	5.8178	1		1.31717	0.119643	0.281581	0.550397		4.6	1	1	1.07989	0.940911	-0.0264515	0.75092	2	7	2	2	1.4616	1.8439	0.265737	114.22	2	0	0	0	NaN	NaN		NaN	0
	1053	Tb927.11.5520	Tb927.11.5520	TIM	triosephosphate isomerase (TIM)	26.819	54	0	163.82	1		1.00588	0.00254455	0.281752	0.550132		54	10	10	1.10624	1.0089	0.00384726	5.1852	14	54	10	10	0.79318	0.98985	-0.00443061	5.3559	16	54	10	10	0.70715	1.0191	0.0082168	4.8456	13
	859	Tb927.11.14980	Tb927.11.14980		hypothetical protein, conserved	58.419	13.6	0	21.224	1	1	1.03403	0.0145346	0.281996	0.549757		13.6	5	5	1.14382	0.997805	-0.000954411	11.358	5	10.8	4	4	0.77444	0.97291	-0.0119273	19.136	4	8.5	3	3	0.77971	1.1389	0.0564856	19.77	4
	559	Tb927.10.470	Tb927.10.470		choline dehydrogenase, putative	56.921	37.5	0	86.804	1	1	1.03498	0.0149305	0.282961	0.548274		28	9	9	1.25623	1.13603	0.055389	23.152	11	37.5	13	13	0.8156	1.0216	0.00928088	4.9013	14	28.4	9	9	0.64895	0.95526	-0.0198784	3.1786	11
	474	Tb927.10.2040	Tb927.10.2040		protein kinase, putative	93.874	21.2	0	55.902	1		1.03481	0.0148595	0.283244	0.54784		14.8	9	9	1.10417	0.983091	-0.00740637	6.3757	8	17	10	10	0.77136	0.98502	-0.00655495	44.485	11	13.9	8	8	0.77751	1.1443	0.0585399	3.9127	7
	2074	Tb927.8.3490	Tb927.8.3490		hypothetical protein, conserved	120.39	20.9	0	120.23	1		1.09564	0.0396688	0.28368	0.547171		17.9	13	7	0.95229	0.872448	-0.0592604	15.678	8	19.3	14	8	0.86831	1.0844	0.0351895	15.142	11	14.7	10	6	0.94513	1.3902	0.143077	67.651	7
	1840	Tb927.7.2390	Tb927.7.2390		hypothetical protein, conserved	102.86	6.4	0	17.618	1		1.03986	0.0169752	0.283725	0.547102		6.4	5	5	1.1928	1.09142	0.0379907	21.676	4	1.7	1	1	0.8066	0.99074	-0.0040403	NaN	1	1.7	1	1	NaN	NaN		NaN	0
	535	Tb927.11.14130;Tb927.10.3840	Tb927.11.14130;Tb927.10.3840		ribosomal protein L18, putative;60S ribosomal protein L18a, putative	20.904	36.9	0	35.604	2		1.02589	0.0110999	0.283854	0.546906		20.1	3	3	1.03319	0.951384	-0.0216441	5.7276	3	36.9	5	5	0.84882	1.065	0.0273496	8.7813	7	17.9	2	2	0.73584	1.0656	0.0275942	19.914	4
	1169	Tb927.11.9660	Tb927.11.9660		hypothetical protein, conserved	31.406	7.1	0.0022989	2.8499	1		1.0693	0.0290984	0.284617	0.545739		3.5	1	1	1.19829	1.09749	0.0404006	NaN	1	7.1	2	2	1.0173	1.2516	0.0974656	10.882	2	3.5	1	1	0.62015	0.89008	-0.050571	NaN	1
	995	Tb927.11.3860	Tb927.11.3860		hypothetical protein, conserved	50.409	16	0	20.54	1	1	1.01442	0.00621925	0.284626	0.545725		16	6	6	1.11941	1.01591	0.00685481	7.1677	6	13.7	5	5	0.77764	0.97713	-0.0100477	5.0268	6	11.8	4	4	0.72879	1.0516	0.0218506	23.017	4
	1215	Tb927.2.3580	Tb927.2.3580	TFIIS2-1	transcription elongation factor s-II, putative (TFIIS2-1)	52.172	8.8	0	8.6289	1		1.0453	0.0192403	0.285259	0.544761		6	1	1	1.01748	0.917852	-0.0372272	NaN	1	8.8	2	2	0.90432	1.1362	0.0554548	3.0173	2	6	1	1	0.76216	1.0952	0.0394934	NaN	1
	1985	Tb927.7.7430;Tb927.7.7420	Tb927.7.7430;Tb927.7.7420		ATP synthase alpha chain, mitochondrial precursor,ATP synthase F1, alpha subunit;ATP synthase alpha chain, mitochondrial precursor,ATP synthase F1, alpha subunit	63.502	36.3	0	242.57	2	1	1.01326	0.00572113	0.285402	0.544542		36.3	22	22	1.15368	1.05098	0.0215957	8.0898	30	34.9	19	19	0.79812	1.0072	0.00311572	7.5231	29	24.5	16	16	0.6804	0.98277	-0.00754811	5.5814	24
	818	Tb927.11.13600	Tb927.11.13600		hypothetical protein, conserved	40.402	4	0	20.889	1	1	1.28725	0.109664	0.285607	0.544231		4	1	1	1.92378	1.76638	0.247084	NaN	1	4	1	1	0.76551	0.93809	-0.0277555	NaN	1	0	0	0	NaN	NaN		NaN	0
	1155	Tb927.11.940	Tb927.11.940	KREPB5	KREPB5 (KREPB5)	43.464	11.3	0	10.207	1	1	1.07918	0.0330933	0.285766	0.543989		8.9	3	3	0.967399	0.888257	-0.0514613	129	3	8.4	3	3	1.0448	1.3166	0.119454	NaN	1	2.6	1	1	0.73849	1.0747	0.0312872	NaN	1
	800	Tb927.11.13140	Tb927.11.13140	COXX	cytochrome oxidase subunit X (COXX)	13.672	30.2	0	39.506	1	1	1.02869	0.0122834	0.28778	0.540939		30.2	3	3	1.20129	1.10654	0.0439659	4.609	3	30.2	3	3	0.75754	0.95454	-0.0202059	12.479	4	13.8	1	1	0.71267	1.0306	0.0130901	8.3807	2
	368	Tb927.10.12740	Tb927.10.12740	ZC3H35	zinc finger protein family memeber, putative (ZC3H35)	51.324	14.3	0	17.871	1		1.59762	0.203474	0.288069	0.540503		11	2	2	0.503297	0.461595	-0.335739	155.43	2	5.1	1	1	4.2899	5.3582	0.729019	NaN	1	8.4	2	2	1.1306	1.6487	0.217142	70.293	2
	2212	Tb927.9.10580	Tb927.9.10580		3-demethylubiquinone-9 3-methyltransferase, putative	31.206	11.5	0	13.241	1	1	1.00495	0.00214618	0.288224	0.54027		11.5	3	3	1.11251	1.01657	0.00713729	9.6204	3	11.5	3	3	0.78574	0.99096	-0.00394388	8.8297	3	11.5	3	3	0.69919	1.0075	0.00324505	6.3178	3
	763	Tb927.11.11620	Tb927.11.11620		hypothetical protein, conserved	27.683	27.3	0	10.59	1	1	1.0413	0.0175761	0.288998	0.539104		13.4	3	3	1.18984	1.08064	0.0336798	31.2	4	8	2	2	0.90726	1.1314	0.0536162	27.152	4	12.6	3	3	0.64356	0.92349	-0.0345678	17.648	4
	1051	Tb927.11.5500	Tb927.11.5500	KRIPP1	mitochondrial RNA binding protein 1,mitochondrial edited mRNA stability factor 1,Mitochondrial poly(A) polymerase 1	94.96	6.9	0	12.709	1	1	1.06377	0.0268475	0.289222	0.538768		6.9	5	5	1.38681	1.28325	0.108312	4.8912	4	4.6	3	3	0.76452	0.95735	-0.0189293	26.861	3	1	1	1	0.66994	0.97985	-0.0088404	NaN	1
	301	Tb927.10.10320	Tb927.10.10320		dynein light chain, putative,dynein Tctex1 family, putative	12.161	13.8	0.0051971	2.2414	1		1.12096	0.04959	0.289627	0.53816		13.8	1	1	0.923446	0.845595	-0.0728379	NaN	1	13.8	1	1	0.86842	1.0813	0.0339462	NaN	1	13.8	1	1	1.0592	1.5405	0.187662	NaN	1
	1339	Tb927.3.3520	Tb927.3.3520		hypothetical protein, conserved	47.641	14.1	0	17.395	1		1.0334	0.0142703	0.290375	0.53704		14.1	4	4	1.15043	1.04425	0.0188066	17.334	4	3.7	1	1	0.75226	0.94267	-0.0256403	NaN	1	7	2	2	0.77231	1.1211	0.0496444	8.2247	2
	1905	Tb927.7.4270	Tb927.7.4270		hypothetical protein, conserved	25.241	17.1	0	5.9349	1		1.09082	0.0377536	0.291135	0.535905		17.1	3	3	1.13453	0.988729	-0.00492295	43.241	3	3.6	1	1	0.71054	0.92376	-0.0344408	NaN	1	5.9	1	1	0.97548	1.4211	0.152625	NaN	1
	1966	Tb927.7.680;Tb11.v5.0778	Tb927.7.680;Tb11.v5.0778		chaperone protein DNAj, putative;chaperone protein DNAj, putative	88.706	9.2	0	14.802	2	1	1.06974	0.0292776	0.291552	0.535284		9.2	5	5	1.27707	1.1679	0.0674045	19.302	4	4.4	2	2	0.77476	0.97983	-0.00884927	35.11	3	0	0	0	NaN	NaN		NaN	0
	1423	Tb927.4.1350	Tb927.4.1350	glx2-2	glyoxalase II (glx2-2)	52.579	6.5	0.00049188	3.9315	1		1.19445	0.0771668	0.291631	0.535166		4.6	1	1	1.06562	0.947598	-0.0233759	NaN	1	1.9	1	1	1.2189	1.5056	0.17771	NaN	1	0	0	0	NaN	NaN		NaN	0
	1935	Tb927.7.5530	Tb927.7.5530		hypothetical protein, conserved	42.241	5.8	0.00048733	3.787	1		1.06841	0.0287383	0.29222	0.53429		0	0	0	NaN	NaN		NaN	0	3.2	1	1	0.9225	1.165	0.0663259	NaN	1	5.8	2	2	0.67089	0.97983	-0.00884927	7.4825	2
	2280	Tb927.9.1410	Tb927.9.1410		hypothetical protein, conserved	66.632	18.3	0	37.789	1		1.03304	0.0141169	0.292656	0.533643		9.6	4	4	1.06231	0.979048	-0.00919584	14.221	6	10.4	3	3	0.78967	0.98549	-0.00634778	14.04	3	11.4	3	3	0.79721	1.1426	0.0578942	9.8319	4
	1219	Tb927.2.3910	Tb927.2.3910		beta-ketoacyl synthase family protein, putative	52.044	15	0	36.188	1	1	1.01825	0.00785485	0.292892	0.533292		10.6	4	4	1.06744	0.963948	-0.0159463	2.8645	4	10.6	4	4	0.83785	1.0579	0.0244446	5.1449	4	15	5	5	0.70915	1.0353	0.0150662	20.908	7
	2359	Tb927.9.5150	Tb927.9.5150	NHP2	ribosomal protein S6, putative,NHP2/RS6-like protein (NHP2)	13.572	12.7	0	20.863	1		1.02756	0.0118057	0.293028	0.533091		12.7	1	1	1.08406	0.985707	-0.00625207	12.527	2	12.7	1	1	0.78268	0.98435	-0.00685045	8.3261	2	12.7	1	1	0.77241	1.1182	0.0485195	5.7793	2
	1920	Tb927.7.5100	Tb927.7.5100		hypothetical protein, conserved	32.988	4.8	0.0084104	2.0075	1		1.07722	0.0323036	0.293037	0.533077		4.8	1	1	1.07689	0.976849	-0.0101727	NaN	1	0	0	0	NaN	NaN		NaN	0	4.8	1	1	0.81553	1.1879	0.0747799	NaN	1
	2093	Tb927.8.4660;Tb11.v5.0863	Tb927.8.4660		hypothetical protein, conserved	117.96	36	0	323.31	2		1.01451	0.00625589	0.293969	0.531698		27.9	29	29	1.05806	0.974469	-0.011232	9.4738	37	33.6	32	32	0.81481	1.0172	0.00740635	9.3961	43	29.6	25	25	0.73222	1.0534	0.0225933	25.993	31
	140	Tb927.5.295b;Tb11.v5.0214;Tb927.5.280;Tb10.v4.0220	Tb927.5.295b;Tb11.v5.0214		retrotransposon hotspot (RHS) protein 1;retrotransposon hot spot (RHS) protein, putative	95.127	32.4	0	134.44	4	1	1.03448	0.0147232	0.294217	0.531332		28.6	20	13	1.00966	0.931359	-0.0308829	22.866	13	26.8	18	12	0.85171	1.0756	0.0316508	8.7349	12	15.2	10	4	0.75865	1.1051	0.0434016	80.461	3
	1496	Tb927.4.4090	Tb927.4.4090		hypothetical protein, conserved	35.549	28.6	0	38.435	1		1.01869	0.00804355	0.294528	0.530874		21.6	5	5	1.0573	0.962742	-0.0164901	32.371	5	24.3	6	6	0.83313	1.0356	0.015192	27.025	5	21	5	5	0.73605	1.0603	0.0254288	24.267	5
	1058	Tb927.11.570	Tb927.11.570		hypothetical protein, conserved	21.079	21.4	0	6.7219	1	1	1.05434	0.0229796	0.294726	0.530582		4.3	1	1	1.36217	1.24496	0.0951547	NaN	1	4.3	1	1	0.77108	0.97174	-0.0124499	NaN	1	21.4	2	2	0.65254	0.9688	-0.0137659	1.4142	2
	241	Tb927.1.1390	Tb927.1.1390		hypothetical protein, conserved	28.393	22	0	24.199	1	1	1.11905	0.048848	0.296254	0.528335		0	0	0	NaN	NaN		NaN	0	18.4	2	2	0.76607	0.96217	-0.0167482	2.5748	2	22	3	3	0.89031	1.3015	0.114444	22.838	3
	749	Tb927.6.720;Tb927.11.11230	Tb927.6.720;Tb927.11.11230		40S ribosomal protein L14, putative;60S ribosomal protein L14, putative	21.443	20.6	0	13.33	2		1.11815	0.0484985	0.296984	0.527267		16.9	3	3	0.995718	0.917179	-0.037546	39.716	3	16.9	3	3	0.76383	0.95615	-0.019474	56.417	3	10.1	2	2	1.1029	1.5941	0.202516	95.104	2
	2284	Tb927.9.1420	Tb927.9.1420		hypothetical protein, conserved	34.625	37.7	0	84.892	1		1.01011	0.00436766	0.30095	0.521506		37.7	8	8	1.08403	1.00041	0.000178024	5.8657	12	37.7	8	8	0.82998	1.0429	0.0182427	29.554	12	37.7	9	9	0.68851	0.98783	-0.00531779	8.4297	11
	184	Tb927.11.15470;Tb11.v5.0544	Tb927.11.15470;Tb11.v5.0544		methionyl-tRNA formyltransferase;methionyl-tRNA formyltransferase, putative	71.337	27.2	0	60.159	2	1	1.02344	0.0100614	0.301386	0.520877		24.3	11	11	1.04241	0.951475	-0.0216027	7.7888	15	24.1	10	10	0.8682	1.0803	0.0335444	15.351	13	17.5	7	7	0.73433	1.0429	0.0182427	9.2386	8
	1301	Tb927.3.2110	Tb927.3.2110		TFIIF-stimulated CTD phosphatase, putative	47.205	6.4	0	6.1671	1		1.11501	0.0472768	0.301487	0.520731		3.8	1	1	0.87943	0.807168	-0.0930362	32.577	2	6.4	2	2	1.1882	1.4913	0.173565	39.691	2	3.8	1	1	0.79109	1.1516	0.0613017	NaN	1
	720	Tb927.11.10330	Tb927.11.10330		hypothetical protein, conserved	70.392	15.3	0	21.906	1		1.17366	0.0695431	0.302097	0.519854		11.6	5	5	0.97144	0.889363	-0.0509208	11.811	5	13.6	5	5	0.70982	0.9161	-0.0380571	2.6294	5	6.3	2	2	1.3555	1.9843	0.297607	66.396	2
	880	Tb927.11.15800	Tb927.11.15800		hypothetical protein, conserved	89.585	7.1	0	13.176	1		1.06861	0.0288204	0.3021	0.519849		7.1	5	5	1.15489	0.862887	-0.064046	21.278	5	5.5	4	4	0.9151	1.1476	0.0597905	23.338	4	1.3	1	1	0.86181	1.2323	0.0907164	NaN	1
	1126	Tb927.11.8370	Tb927.11.8370		hypothetical protein, conserved	105.1	4.8	0	15.822	1		1.12241	0.0501527	0.30259	0.519145		4.8	4	4	1.03864	0.954836	-0.0200711	6.2283	2	3	2	2	1.0507	1.3194	0.120376	48.372	2	0	0	0	NaN	NaN		NaN	0
	1470	Tb927.4.3070	Tb927.4.3070		hypothetical protein, conserved	51.431	12.1	0	10.085	1	1	1.11692	0.0480214	0.304477	0.516446		10.3	3	3	1.00738	0.922765	-0.034909	10.264	3	1.8	1	1	1.2761	1.6137	0.207823	NaN	1	1.8	1	1	0.63668	0.93573	-0.0288494	NaN	1
	1825	Tb927.7.1910	Tb927.7.1910	GCVP	pyridoxal phosphate containing glycine decarboxylase, putative (GCVP)	106.29	21.9	0	166.05	1	1	1.00917	0.00396394	0.304553	0.516337		16.2	12	12	1.11676	1.02245	0.00964335	7.8886	16	21.6	15	15	0.78308	0.97905	-0.00919513	17.493	15	14.1	10	10	0.71113	1.0267	0.0114436	7.9114	11
	1565	Tb927.5.1800	Tb927.5.1800		hypothetical protein, conserved	13.427	21.1	0	8.2311	1		1.10172	0.0420695	0.304916	0.515819		21.1	2	2	1.37929	1.26443	0.101895	NaN	1	7.3	1	1	0.7808	0.95994	-0.0177559	NaN	1	0	0	0	NaN	NaN		NaN	0
	1762	Tb927.6.4530	Tb927.6.4530	RBP17	RNA-binding protein, putative (RBP17)	16.821	49	0	31.225	1		1.03541	0.0151109	0.306196	0.514		23.5	3	3	1.08541	0.97924	-0.00911077	7.3473	3	37.9	4	4	0.77833	0.97393	-0.0114723	33.749	4	43.1	4	4	0.80331	1.1639	0.0659157	10.361	4
	564	Tb927.10.4880	Tb927.10.4880		hypothetical protein, conserved	25.965	17	0	11.115	1	1	1.07325	0.0307024	0.306489	0.513585		17	3	3	0.956389	0.872981	-0.0589951	23.473	2	11.6	2	2	0.85686	1.0738	0.0309234	1.4263	2	8	1	1	0.90471	1.3188	0.120179	NaN	1
	2275	Tb927.9.13920;Tb927.9.13880;Tb927.9.13820	Tb927.9.13920;Tb927.9.13880;Tb927.9.13820	KMP-11	kinetoplastid membrane protein KMP-11 (KMP-11);unspecified product;kinetoplastid membrane protein KMP-11	11.076	32.6	0	11.35	3		1.02172	0.00933382	0.307753	0.511798		31.5	3	3	1.09433	1.01247	0.00538388	1.3765	3	32.6	4	4	0.7678	0.964	-0.015923	10.064	5	21.7	2	2	0.74316	1.0928	0.0385407	5.8813	2
	367	Tb927.10.12710	Tb927.10.12710		heat shock protein 110, putative	90.863	9.9	0	10.088	1		1.18836	0.0749485	0.308231	0.511123		0	0	0	NaN	NaN		NaN	0	8.1	5	5	0.74264	0.92464	-0.0340273	48.291	5	4.7	3	3	1.1335	1.5273	0.183924	72.96	2
	2177	Tb927.8.7700;Tb927.8.7680;Tb927.4.4020;Tb927.4.4010;Tb927.4.4000;Tb927.4.3990	Tb927.8.7700;Tb927.8.7680		amino acid transporter, putative;amino acid transporter, putative	51.74	12.1	0	20.255	6		1.02692	0.0115373	0.308389	0.510901		12.1	3	2	1.25204	1.10972	0.0452126	8.7431	3	12.1	3	2	0.74545	0.94866	-0.0228894	20.773	2	6.8	1	1	0.71575	1.0287	0.0122887	NaN	1
	883	Tb927.11.15850	Tb927.11.15850		kinteoplast poly(A) polymerase complex 1 subunit	86.756	17.4	0	65.067	1	1	1.01728	0.00743885	0.308649	0.510535		16.3	8	8	1.15781	1.06282	0.0264614	5.5011	10	11.7	6	6	0.8238	1.0292	0.0124998	10.149	9	10.1	4	4	0.66361	0.9624	-0.0166444	51.276	4
	1791	Tb927.6.890	Tb927.6.890		hypothetical protein, conserved	173.05	8.2	0	51.802	1		1.01728	0.00743905	0.309814	0.508899		6.3	8	8	1.07034	0.98068	-0.00847246	13.328	8	7.6	9	9	0.79588	0.99552	-0.00195001	15.493	9	4	5	5	0.74871	1.0783	0.0327396	15.859	5
	2393	Tb927.9.7150	Tb927.9.7150		RNA pseudouridylate synthase protein, putative	140.81	9.5	0	61.625	1	1	1.01312	0.00566208	0.309921	0.508749		6.9	7	7	1.08713	0.990099	-0.00432138	9.5792	9	4.8	4	4	0.79859	0.99121	-0.00383433	19.702	4	3	3	3	0.7247	1.0596	0.0251419	9.7387	3
	1412	Tb927.3.940	Tb927.3.940		hypothetical protein, conserved	18.107	23.4	0	31.883	1	1	1.01192	0.00514463	0.310217	0.508335		22.1	2	2	1.15505	1.04738	0.0201059	4.0117	2	22.1	2	2	0.76583	0.97593	-0.0105813	0.13025	2	23.4	3	3	0.70423	1.0137	0.00590945	24.635	3
	1210	Tb927.2.3180;Tb11.v5.0782	Tb927.2.3180;Tb11.v5.0782	KPAF1	kinetoplast polyadenylation/uridylation factor 1 (PPR1);hypothetical protein, conserved	114.38	14.2	0	76.884	2	1	1.0334	0.0142681	0.310544	0.507877		10.8	8	8	1.19352	1.07322	0.0306867	14.359	8	6.4	5	5	0.88927	1.1125	0.0463	23.214	5	8.4	5	5	0.64177	0.92431	-0.0341823	24.592	5
	1311	Tb927.3.2410	Tb927.3.2410		peroxisome assembly protein, putative	32.979	6	0	6.8018	1		1.06796	0.0285545	0.311575	0.506438		6	1	1	0.925583	0.857707	-0.0666613	NaN	1	6	1	1	1.0022	1.2602	0.100439	NaN	1	6	1	1	0.78385	1.1269	0.0518854	NaN	1
	390	Tb927.10.13490;Tb927.10.13480	Tb927.10.13490;Tb927.10.13480		serine/threonine kinase, putative;protein kinase, putative	31.003	5.9	0	4.6963	2		1.04999	0.0211869	0.311823	0.506092		5.9	1	1	1.39433	1.2209	0.086679	NaN	1	5.9	1	1	0.72563	0.91003	-0.0409443	NaN	1	5.9	1	1	0.71891	1.0419	0.017826	NaN	1
	768	Tb927.11.11720	Tb927.11.11720		FG-GAP repeat protein, putative	68.206	4.7	0	9.5473	1		1.04508	0.0191495	0.313217	0.504154		2.7	1	1	0.982415	0.895175	-0.0480921	NaN	1	4.7	2	2	0.90815	1.131	0.0534626	5.6002	2	2.7	1	1	0.78043	1.1274	0.052078	NaN	1
	1780	Tb927.6.5130;Tb927.6.5120	Tb927.6.5130;Tb927.6.5120		60S acidic ribosomal protein P2, putative;60S acidic ribosomal protein P2, putative	10.444	27.1	0	28.146	2		1.0426	0.0181183	0.313326	0.504004		19.6	1	1	1.34239	1.20683	0.0816447	NaN	1	27.1	3	3	0.7769	0.97732	-0.00996321	28.808	3	19.6	1	1	0.65268	0.96089	-0.0173263	NaN	1
	155	Tb11.v5.0325;Tb927.4.110;Tb927.2.100;Tb09.v4.0013	Tb11.v5.0325		retrotransposon hot spot (RHS) protein, putative	36.986	27.1	0	10.051	4	1	1.10443	0.0431401	0.313513	0.503745		22.2	6	2	1.50741	1.37536	0.138418	32.256	2	21.5	7	3	1.0088	1.2526	0.0978124	39.857	2	17.5	6	2	0.54647	0.78197	-0.10681	0.45888	2
	487	Tb927.10.2350	Tb927.10.2350		pyruvate dehydrogenase complex E3 binding protein, putative	27.335	16.2	0	45.171	1	1	1.01545	0.00665814	0.314557	0.502301		16.2	3	3	1.1213	1.01718	0.00739781	11.953	3	11.2	2	2	0.77936	0.96801	-0.0141202	2.1495	2	6.9	1	1	0.74139	1.0634	0.0266967	NaN	1
	495	Tb927.10.2560	Tb927.10.2560	mMDH	mitochondrial malate dehydrogenase (mMDH)	33.188	71.4	0	294.4	1		1.00389	0.00168526	0.315728	0.500687		58.2	12	12	1.10528	1.01522	0.00655931	5.9183	15	65.7	12	12	0.79046	0.99129	-0.00379927	8.3475	16	61	10	10	0.69861	1.0053	0.00229568	4.2082	16
	417	Tb927.10.14350	Tb927.10.14350		hypothetical protein, conserved	10.907	44.3	0	14.601	1	1	1.06316	0.0265987	0.316376	0.499797		9.3	1	1	1.01379	0.926526	-0.0331422	NaN	1	18.6	1	1	1.0593	1.3205	0.120738	NaN	1	44.3	3	3	0.6843	0.9822	-0.00780007	20.271	3
	222	Tb927.4.3110;Tb11.v5.0960	Tb927.4.3110;Tb11.v5.0960		tRNA-dihydrouridine synthase 4, putative;tRNA-dihydrouridine synthase 4, putative	45.355	21.5	0	19.809	2		1.07331	0.0307267	0.316671	0.499391		11.7	4	4	1.50766	1.38318	0.14088	13.78	4	6.9	2	2	0.76246	0.9547	-0.0201331	7.7466	2	9.8	3	3	0.63474	0.93634	-0.0285664	17.101	3
	998	Tb927.11.3920	Tb927.11.3920		hypothetical protein, conserved	74.746	14.5	0	45.664	1		1.01399	0.00603281	0.317065	0.498851		10.4	8	8	1.06679	0.976372	-0.0103848	15.78	9	11.4	7	7	0.79552	1.0045	0.00194994	7.3258	8	5.1	3	3	0.73227	1.063	0.0265333	64.492	3
	135	Tb927.7.5080;Tb11.v5.0188	Tb927.7.5080;Tb11.v5.0188		ATP-NAD kinase-like protein;hypothetical protein, conserved	79.822	25.3	0	60.92	2	1	1.03006	0.0128637	0.317767	0.497891		20.3	10	10	1.08587	0.992851	-0.0031157	21.147	10	14.7	7	7	0.90361	1.1446	0.0586537	14.392	9	15.1	6	6	0.66893	0.96173	-0.0169468	44.152	5
	729	Tb927.11.10630	Tb927.11.10630		hypothetical protein, conserved	98.538	5.6	0	4.0579	1		1.24645	0.095674	0.318593	0.496764		0	0	0	NaN	NaN		NaN	0	5.6	3	3	1.3529	1.7578	0.244969	42.558	3	1.3	1	1	0.60126	0.88385	-0.0536214	NaN	1
	2209	Tb927.9.10520	Tb927.9.10520		hypothetical protein, conserved	29.587	22.5	0	22.954	1	1	1.05558	0.023491	0.319309	0.495789		22.5	5	5	0.97972	0.890789	-0.050225	33.828	5	22.5	5	5	1.0075	1.2538	0.0982283	16.069	5	15.8	3	3	0.72489	1.0531	0.0224696	5.5039	3
	1014	Tb927.11.4450	Tb927.11.4450	ALBA2	ALBA-Domain Protein (ALBA2)	12.757	31.6	0	8.8074	1		1.02707	0.0116019	0.319381	0.495691		23.9	2	2	1.08128	0.942241	-0.0258382	9.2462	3	31.6	3	3	0.88526	1.1155	0.0474696	13.989	5	31.6	3	3	0.71525	1.0308	0.0131744	24.082	5
	679	Tb927.10.9110	Tb927.10.9110		hypothetical protein, conserved	36.946	8.8	0.0027162	2.6281	1	1	1.07079	0.0297023	0.319404	0.495659		8.8	2	2	1.03497	0.961816	-0.016908	21.647	2	4.4	1	1	0.96253	1.1921	0.0763127	12.611	3	0	0	0	NaN	NaN		NaN	0
	175	Tb11.v5.0482;Tb927.11.2720	Tb11.v5.0482;Tb927.11.2720		hypothetical protein, conserved;hypothetical protein, conserved	48.075	9.1	0	10.681	2		1.10398	0.0429621	0.319842	0.495065		7	3	3	0.983671	0.894135	-0.0485971	11.406	3	7.2	3	3	0.75282	0.95055	-0.022025	11.62	3	2.6	1	1	1.0863	1.5831	0.199508	NaN	1
	1130	Tb927.11.8450	Tb927.11.8450		hypothetical protein, conserved	32.251	9	0	8.1589	1		1.00579	0.00250871	0.320154	0.494641		0	0	0	NaN	NaN		NaN	0	6	1	1	0.78937	0.99667	-0.00144861	NaN	1	9	2	2	0.69665	1.015	0.00646604	17.805	2
	239	Tb927.1.1340	Tb927.1.1340		FG-GAP repeat protein, putative,intergrin alpha chain protein, putative	79.368	4.4	0	5.62	1		1.04653	0.0197516	0.320233	0.494534		1.9	1	1	1.33856	1.21501	0.0845791	NaN	1	2.8	2	2	0.72819	0.9104	-0.0407678	14.961	2	1.6	1	1	0.71	1.0362	0.0154436	NaN	1
	1137	Tb927.11.8800	Tb927.11.8800		hypothetical protein, conserved	30.621	15.5	0	5.1975	1	1	1.08213	0.0342807	0.321452	0.492883		10.8	2	2	0.986388	0.871688	-0.0596391	16.927	2	9.7	2	2	1.119	1.429	0.155032	18.841	2	15.5	3	3	0.68797	1.0173	0.00744904	35.268	3
	1580	Tb927.5.2320	Tb927.5.2320		hypothetical protein, conserved	82.159	9.9	0	14.91	1		1.02666	0.0114249	0.322547	0.491407		6.5	4	4	1.13937	1.03477	0.014843	8.1573	2	6.7	4	4	0.75322	0.93967	-0.0270246	12.302	4	5.2	3	3	0.76562	1.1129	0.0464561	21.748	3
	533	Tb927.10.3770	Tb927.10.3770		predicted TPR repeat protein	78.604	5.1	0	11.658	1	1	1.13205	0.0538642	0.322592	0.491347		0	0	0	NaN	NaN		NaN	0	1.9	1	1	1.1009	1.3813	0.140288	NaN	1	3.3	1	1	0.65139	0.92777	-0.0325597	NaN	1
	709	Tb927.11.10070	Tb927.11.10070		hypothetical protein, conserved	25.415	37.6	0	45.96	1		1.08683	0.036163	0.326126	0.486615		22.6	4	4	0.929282	0.839772	-0.0758388	9.8562	4	37.6	6	6	0.83642	1.0532	0.0225109	12.792	7	19.5	3	3	1.0044	1.4515	0.161817	14.207	3
	2136	Tb927.8.6250	Tb927.8.6250		hypothetical protein, conserved	75.474	44.9	0	278.54	1		1.01148	0.00495534	0.326491	0.486128		38.5	23	23	1.07841	0.980777	-0.00842986	7.2154	34	40.7	24	24	0.79781	1.0001	4.34273e-05	12.446	33	28.5	15	15	0.73237	1.055	0.0232525	21.681	19
	2117	Tb927.8.560	Tb927.8.560		hypothetical protein, conserved	64.616	17	0	22.572	1		1.03952	0.0168333	0.32681	0.485704		11.1	4	4	1.23528	1.1422	0.0577437	26.889	4	15.8	6	6	0.71364	0.89789	-0.0467769	19.027	4	11.4	4	4	0.75259	1.0953	0.0395331	53.574	4
	1138	Tb927.11.8870	Tb927.11.8870	KREH1	mitochondrial DEAD box protein,KREH1 (KREH1)	60.659	46.5	0	268.83	1	1	1.00831	0.00359534	0.330507	0.480819		39.7	19	19	1.10864	1.02245	0.00964335	10.782	24	39.7	20	20	0.8151	1.0271	0.0116127	10.881	26	32.2	15	15	0.67377	0.97618	-0.0104701	11.203	18
	362	Tb927.10.12540	Tb927.10.12540	NDUFS1	electron transfer protein, putative,ferredoxin, putative	33.754	32	0	56.592	1	1	1.03046	0.0130318	0.330562	0.480747		32	6	6	1.08112	0.970403	-0.013048	12.4	9	22.8	4	4	0.92086	1.1593	0.0641958	5.8823	7	22.1	4	4	0.66778	0.97263	-0.0120523	15.045	6
	1926	Tb927.7.5290	Tb927.7.5290		hypothetical protein, conserved	81.281	6.4	0	19.942	1		1.07958	0.0332548	0.330878	0.480332		6.4	3	3	1.55792	1.45894	0.164037	10.184	2	5.1	2	2	0.7339	0.92123	-0.0356319	18.146	2	2.5	1	1	0.63967	0.93618	-0.0286406	NaN	1
	167	Tb927.10.16090;Tb11.v5.0412	Tb927.10.16090;Tb11.v5.0412		hypothetical protein, conserved;hypothetical protein, conserved	89.562	4.6	0	4.9707	2		1.68531	0.226681	0.331316	0.479757		4.6	3	3	0.770832	0.691419	-0.160258	14.536	3	0	0	0	NaN	NaN		NaN	0	1.9	1	1	2.8276	4.1079	0.61362	NaN	1
	456	Tb927.10.15760	Tb927.10.15760		hypothetical protein, conserved	36.411	26.3	0	70.281	1		1.07895	0.0330025	0.331363	0.479696		16.8	4	4	1.06514	0.969838	-0.0133008	12.808	6	26.3	5	5	0.70409	0.89269	-0.0492993	22.273	5	13.3	2	2	0.99414	1.4508	0.161608	3.0362	2
	1566	Tb927.5.1810;Tb927.5.1830	Tb927.5.1810;Tb927.5.1830	p67	lysosomal/endosomal membrane protein p67 (p67);lysosomal/endosomal membrane protein p67,lysosomal membrane glycoprotein	72.732	12.6	0	27.743	2		1.01843	0.00793177	0.331776	0.479155		12.6	6	6	1.04885	0.965717	-0.0151501	18.56	6	7.4	4	4	0.87268	1.0912	0.0379044	6.0405	6	5.5	3	3	0.69745	1.0024	0.00104106	12.867	4
	359	Tb927.10.12500	Tb927.10.12500		P-type H -ATPase, putative	100.23	24.8	0	110.48	1		1.06431	0.0270667	0.331895	0.479		20.9	17	4	1.28634	1.1843	0.0734621	14.106	4	20.2	15	4	0.76526	0.95647	-0.0193286	9.7854	4	14.7	11	0	NaN	NaN		NaN	0
	974	Tb927.11.3260	Tb927.11.3260	POLID	mitochondrial DNA polymerase I protein D, putative (POLID)	182.88	4	0	15.432	1	1	1.03403	0.0145343	0.332267	0.478513		2	3	3	1.1018	1.01308	0.00564331	22.301	3	2.6	4	4	0.74776	0.93237	-0.0304117	26.11	3	2.6	3	3	0.80059	1.1705	0.0683714	13.336	3
	1460	Tb927.4.2540	Tb927.4.2540		ubiquitin, putative	8.668	21.8	0	15.049	1		1.16702	0.0670778	0.3324	0.478339		21.8	1	1	2.29284	2.0839	0.318876	NaN	1	21.8	1	1	0.58573	0.73323	-0.13476	NaN	1	21.8	1	1	0.71373	1.0402	0.0171168	NaN	1
	395	Tb927.10.13620	Tb927.10.13620		NADH-ubiquinone oxidoreductase complex I subunit,FT putative	54.791	19.2	0	21.752	1	1	1.03999	0.0170303	0.332512	0.478193		19.2	6	6	1.2823	1.16735	0.0672015	23.044	6	12.8	4	4	0.71419	0.89644	-0.0474788	19.32	4	5.8	2	2	0.7452	1.0749	0.0313681	5.7367	2
	609	Tb927.10.6730;Tb927.10.6720;Tb11.v5.0578;Tb927.10.6740;Tb927.10.6750;Tb927.10.6760	Tb927.10.6730;Tb927.10.6720;Tb11.v5.0578;Tb927.10.6740		hypothetical protein, conserved;hypothetical protein, conserved;hypothetical protein, conserved;hypothetical protein, conserved	53.553	16.5	0	64.369	6		1.03283	0.0140287	0.333146	0.477366		16.1	6	6	1.01112	0.921065	-0.0357099	7.7602	6	7.3	4	4	0.88472	1.1515	0.0612639	11.459	4	6.1	4	4	0.71745	1.0388	0.0165319	15.587	4
	774	Tb927.11.12160	Tb927.11.12160		hypothetical protein, conserved	23.492	9	0	10.892	1	1	1.01535	0.00661573	0.333738	0.476595		9	1	1	1.1217	1.04659	0.0197782	11.534	2	9	1	1	0.76555	0.95517	-0.0199193	0.46782	2	9	1	1	0.71647	1.0471	0.0199882	6.8539	2
	1380	Tb927.3.4990	Tb927.3.4990		oxidoreductase, putative	36.432	12.4	0	10.183	1	1	1.03237	0.013837	0.334457	0.475659		9.7	4	4	0.997904	0.91191	-0.0400483	9.8878	4	7.7	3	3	0.90412	1.1304	0.0532321	30.197	3	5.6	2	2	0.74051	1.0674	0.0283272	NaN	1
	2326	Tb927.9.3100	Tb927.9.3100		hypothetical protein, conserved	44.117	26.4	0	46.551	1		1.03729	0.0158988	0.335579	0.474205		12.2	3	3	0.985222	0.896218	-0.0475864	27.907	4	15.2	5	5	0.87449	1.09	0.0374265	10.072	5	12.5	3	3	0.78544	1.1425	0.0578562	20.633	4
	2170	Tb927.8.7380;Tb927.4.5050	Tb927.8.7380;Tb927.4.5050		dihydrolipoamide dehydrogenase, point mutation,acetoin dehydrogenase e3 component, putative;dihydrolipoamide dehydrogenase, pseudogene, putative,acetoin dehydrogenase e3 component, point mutation,dihydrolipoamide dehydrogenase, point mutation	60.014	68.3	0	261.75	2	1	1.00691	0.00299212	0.3359	0.47379		68.3	29	28	1.12201	1.03428	0.0146364	13.661	38	59.3	22	22	0.788	0.98646	-0.00592052	16.577	29	59.2	21	21	0.68513	1.0006	0.000260499	10.573	29
	1158	Tb927.11.9450	Tb927.11.9450	PPIase	cyclophilin type peptidyl-prolyl cis-trans isomerase, putative (PPIase)	20.52	71.6	0	51.421	1	1	1.06067	0.0255804	0.335902	0.473788		39.5	4	4	1.09379	0.993641	-0.00277063	6.6026	4	53.2	4	4	0.72179	0.89741	-0.0470091	12.04	4	48.9	4	4	0.92668	1.3382	0.126521	25.824	5
	2213	Tb927.9.10630	Tb927.9.10630		hypothetical protein, conserved	28.977	66.9	0	323.31	1	1	1.00603	0.00261095	0.336398	0.473146		66.9	11	11	1.06559	0.981643	-0.00804629	4.809	17	58.3	10	10	0.81132	1.0177	0.00761977	26.688	15	54.1	9	9	0.70868	1.0192	0.00825941	22.406	17
	1520	Tb927.4.5130;CON__Q2KIG3	Tb927.4.5130		hypothetical protein, conserved	28.811	23.4	0	87.03	2		1.00748	0.00323491	0.336885	0.472519		20.8	7	7	1.16984	1.03392	0.0144882	10.039	9	23.4	8	8	0.79381	0.98071	-0.0084594	15.8	10	12.5	4	4	0.69961	1.0085	0.0036759	3.7002	4
	224	Tb927.11.1780;Tb11.v5.0991	Tb927.11.1780;Tb11.v5.0991		protein phosphatase 2C, putative;protein phosphatase 2C, putative	36.559	22.2	0	19.248	2	1	1.02204	0.00946644	0.337431	0.471815		18.9	5	5	1.0959	0.983284	-0.00732094	5.8851	5	13.5	3	3	0.87595	1.1176	0.0482864	15.423	4	14.7	3	3	0.65964	0.97148	-0.0125661	7.365	3
	426	Tb927.10.14630;Tb927.10.14750	Tb927.10.14630;Tb927.10.14750		fibrillarin, putative;fibrillarin, putative	24.997	11.4	0	11.676	2		1.04148	0.017653	0.339448	0.469227		11.4	2	2	0.958405	0.880049	-0.055493	31.274	2	11.4	2	2	0.91202	1.1522	0.0615279	23.4	2	11.4	2	2	0.7724	1.1141	0.0469242	11.927	2
	1070	Tb927.11.6000	Tb927.11.6000		hypothetical protein, conserved	40.82	19.9	0	38.866	1	1	1.00405	0.00175554	0.341528	0.466574		16.8	5	5	1.11789	1.02125	0.00913292	11.824	5	12.3	4	4	0.79501	0.9973	-0.00117418	10.54	4	13.4	4	4	0.69172	0.99382	-0.00269227	9.7612	4
	376	Tb927.10.12960	Tb927.10.12960	RAB5A	ras-related protein rab-5,small GTPase, putative (RAB5A)	24.484	19.1	0	18.536	1		1.05994	0.0252819	0.343543	0.464019		19.1	3	3	0.905551	0.826241	-0.082893	8.0543	3	8.7	1	1	0.98218	1.2215	0.0868935	2.4374	2	15.7	2	2	0.81785	1.1799	0.0718452	5.6604	2
	467	Tb927.10.1870	Tb927.10.1870		hypothetical protein, conserved	21.648	9.4	0	22.188	1	1	1.03546	0.0151318	0.345451	0.461613		9.4	1	1	1.25726	1.14235	0.0577984	NaN	1	9.4	1	1	0.70818	0.89201	-0.0496303	NaN	1	9.4	1	1	0.75741	1.0895	0.0372272	NaN	1
	2366	Tb927.9.5680	Tb927.9.5680		inositol/phosphatidylinositol phosphatase, putative	87.964	6.5	0	11.41	1		1.026	0.0111455	0.345655	0.461357		1.7	1	1	1.01577	0.929195	-0.031893	NaN	1	4.7	3	3	0.82788	1.0308	0.0131744	10.498	4	3.2	2	2	0.77467	1.1276	0.0521551	NaN	1
	1032	Tb927.11.5040	Tb927.11.5040		leucine-rich repeat protein (LRRP), putative	48.562	27	0	114.86	1		1.01967	0.00845809	0.34757	0.458957		22	7	7	1.02528	0.941531	-0.0261654	16.253	7	14.8	5	5	0.86403	1.0913	0.0379442	9.4187	5	22.3	6	6	0.71354	1.0318	0.0135955	10.034	7
	1757	Tb927.6.4430	Tb927.6.4430	HK	homoserine kinase, putative (HK)	35.649	16.4	0	13.892	1		1.07634	0.0319479	0.348234	0.458129		16.4	3	3	1.02488	0.931446	-0.0308426	11.455	2	9.6	2	2	0.71085	0.89786	-0.0467914	29.676	2	16.4	3	3	1.0265	1.491	0.173478	29.011	3
	660	Tb927.10.8210	Tb927.10.8210	KREPA2	KREPA2 (KREPA2)	62.912	10.9	0	25.508	1	1	1.05041	0.0213593	0.348931	0.45726		7.2	1	1	1.28256	1.15594	0.0629338	NaN	1	10.9	2	2	0.75728	0.95452	-0.020215	13.157	2	0	0	0	NaN	NaN		NaN	0
	2105	Tb927.8.5200	Tb927.8.5200		hypothetical protein, conserved	201.55	8.5	0	28.942	1	1	1.02752	0.0117904	0.349706	0.456297		5.5	7	7	1.07706	0.96918	-0.0135956	2.6476	6	1.4	2	2	0.77275	0.96446	-0.0157158	37.695	2	2.2	3	3	0.79626	1.1606	0.0646826	38.003	3
	1038	Tb927.11.5130	Tb927.11.5130		hypothetical protein, conserved	67.196	4.4	0.0060267	2.1934	1		1.11477	0.0471862	0.349915	0.456037		4.4	2	2	1.85646	1.68754	0.227253	4.5685	2	2.1	1	1	0.59083	0.72469	-0.139848	NaN	1	2.3	1	1	0.77781	1.1328	0.0541532	NaN	1
	2150	Tb927.8.6580	Tb927.8.6580		succinate dehydrogenase flavoprotein, putative	66.88	49.3	0	177.38	1	1	1.01023	0.00442204	0.35005	0.45587		41.5	20	20	1.15755	1.05757	0.0243108	12.236	22	43.3	19	19	0.78748	0.98814	-0.00518152	16.539	23	33.7	14	14	0.68428	0.98659	-0.00586329	15.299	19
	2371	Tb927.9.5890	Tb927.9.5890		solanesyl-diphosphate synthase, putative	39.253	46	0	145.12	1	1	1.00396	0.00171554	0.350084	0.455828		37	10	10	1.09803	1.00906	0.00391742	7.5399	12	34.5	9	9	0.78825	0.98675	-0.00579286	3.6887	11	36.5	8	8	0.7063	1.0163	0.00702193	5.1682	10
	1908	Tb927.7.4390	Tb927.7.4390		threonine synthase, putative	73.873	10.2	0	13.227	1		1.11625	0.0477612	0.351359	0.454249		1.3	1	1	0.806777	0.74085	-0.130269	NaN	1	3.6	2	2	1.4169	1.7544	0.244129	47.642	2	8.9	5	5	0.74107	1.0701	0.0294244	4.8219	5
	345	Tb927.10.11870	Tb927.10.11870	MRB11870	mitochondrial RNA binding protein (MRB11870)	34.683	24.8	0	65.13	1	1	1.02446	0.0104951	0.35374	0.451316		24.8	5	5	1.07769	0.981932	-0.00791837	6.96	6	21.6	4	4	0.91114	1.1444	0.0585778	14.482	6	21.6	4	4	0.66219	0.95681	-0.0191743	14.494	7
	1501	Tb927.4.4220	Tb927.4.4220	TbRX2	small GTP-binding rab protein, putative (TbRX2)	61.52	13.9	0	27.486	1		1.09134	0.0379618	0.354008	0.450987		9.2	4	4	0.848536	0.765462	-0.116076	14.998	4	10.7	4	4	1.2182	1.5433	0.18845	44.827	4	2	1	1	0.76425	1.1003	0.0415111	NaN	1
	1163	Tb927.11.9570	Tb927.11.9570		hypothetical protein, conserved	32.962	17.1	0	8.0297	1	1	1.07417	0.0310726	0.354302	0.450626		17.1	3	3	1.59752	1.42318	0.153261	12.306	3	8.4	1	1	0.61585	0.80088	-0.0964326	NaN	1	13.8	2	2	0.80445	1.0874	0.0363893	28.129	2
	1465	Tb927.4.2790	Tb927.4.2790		hypothetical protein, conserved	62.809	8.3	0	21.453	1	1	1.01215	0.00524325	0.354872	0.449929		6.9	3	3	1.0352	0.969556	-0.0134271	49.505	3	6	3	3	0.87074	1.0672	0.0282458	13.419	3	6.2	3	3	0.68296	1.0021	0.000911062	2.3127	2
	213	Tb927.8.2470;Tb11.v5.0799	Tb927.8.2470;Tb11.v5.0799		hypothetical protein, conserved;hypothetical protein, conserved	11.223	11.7	0	7.2393	2	1	1.04263	0.0181295	0.355038	0.449726		11.7	1	1	1.26773	1.1354	0.0551474	NaN	1	11.7	1	1	0.76674	0.95744	-0.0188884	NaN	1	0	0	0	NaN	NaN		NaN	0
	165	Tb927.10.16150;Tb11.v5.0397	Tb927.10.16150;Tb11.v5.0397		ATP-dependent zinc metallopeptidase, putative;ATP-dependent zinc metallopeptidase, putative	62.779	16.1	0	61.848	2	1	1.02364	0.0101481	0.355831	0.448756		15.8	6	6	1.20457	1.09236	0.0383654	2.7467	7	11.4	4	4	0.73838	0.91786	-0.0372236	10.68	5	7.3	2	2	0.73855	1.0698	0.0293026	9.9503	2
	2023	Tb927.8.1870	Tb927.8.1870	tGLP1	Golgi/lysosome glycoprotein 1 (tGLP1)	67.597	14	0	32.628	1		1.03318	0.0141764	0.356205	0.4483		8.9	3	3	1.23565	1.12386	0.0507126	1.7464	3	11	4	4	0.88715	1.1074	0.0443045	5.25	3	9.9	3	3	0.6047	0.88616	-0.0524879	20.885	2
	2073	Tb927.8.3450	Tb927.8.3450		hypothetical protein, conserved	16.536	10	0.00049213	3.9326	1	1	1.17359	0.0695147	0.356789	0.447588		10	1	1	1.76679	1.63476	0.213455	NaN	1	10	1	1	0.66632	0.84251	-0.0744249	NaN	1	0	0	0	NaN	NaN		NaN	0
	2297	Tb927.9.15150;Tb927.9.15110	Tb927.9.15150;Tb927.9.15110		unspecified product;unspecified product	34.636	11	0	8.3935	2		1.08948	0.0372195	0.356989	0.447346		0	0	0	NaN	NaN		NaN	0	11	3	3	0.7075	0.91207	-0.0399718	10.46	2	8.1	2	2	0.89402	1.3014	0.114411	2.4342	2
	1766	Tb927.6.4650	Tb927.6.4650		UV excision repair RAD23 protein, putative	37.808	10.1	0.0014171	3.2233	1		1.04552	0.019333	0.35884	0.445099		3.4	1	1	0.983768	0.901145	-0.0452056	NaN	1	3.4	1	1	1.0413	1.2867	0.109477	NaN	1	10.1	2	2	0.67498	0.98566	-0.00627287	6.2706	2
	1001	Tb927.11.3980	Tb927.11.3980		mitochondrial processing peptidase alpha subunit, putative,metallo-peptidase, Clan ME, Family M16	57.037	48.8	0	323.31	1	1	1.00781	0.00337922	0.359569	0.444218		48.1	19	19	1.13372	1.04004	0.0170509	24.754	23	43.6	18	18	0.80681	1.0099	0.00427837	10.576	24	41.1	17	17	0.68848	0.97456	-0.0111914	10.449	19
	1963	Tb927.7.6650	Tb927.7.6650		hypothetical protein, conserved	104.18	7.1	0	18.12	1		1.04336	0.0184328	0.3598	0.443938		4.6	3	3	1.00127	0.937998	-0.0277979	31.789	3	5.8	4	4	0.75999	0.94503	-0.0245544	23.503	4	7.1	5	5	0.88384	1.2813	0.107651	25.437	5
	1178	Tb927.11.980	Tb927.11.980	TbNup158	Nucleoporin (TbNup158)	158.38	29.7	0	323.31	1		1.00628	0.00271821	0.360053	0.443633		25.6	30	30	1.09636	0.994135	-0.00255481	17.088	34	21.3	26	26	0.7847	0.9883	-0.0051112	14.257	31	22.6	24	24	0.71771	1.0371	0.0158206	10.732	30
	1512	Tb927.4.4630	Tb927.4.4630		hypothetical protein, conserved	18.467	13.9	0	8.4273	1	1	1.0846	0.035269	0.360233	0.443416		13.9	2	2	1.40915	1.28932	0.110362	3.6906	2	13.9	2	2	0.72824	0.91238	-0.0398242	NaN	1	0	0	0	NaN	NaN		NaN	0
	2066	Tb927.8.3260	Tb927.8.3260		hypothetical protein, conserved	22.139	27.2	0	33.783	1	1	1.02593	0.0111162	0.360347	0.443279		23.1	3	3	1.17328	1.03872	0.0165002	5.4609	3	27.2	4	4	0.87289	1.135	0.0549959	7.5539	4	23.1	3	3	0.63684	0.91591	-0.0381472	33.592	3
	149	Tb927.7.4570;Tb11.v5.0270	Tb927.7.4570;Tb11.v5.0270	IG-NH	inosine-guanine nucleoside hydrolase (IG-NH);nucleoside hydrolase, putative	39.39	11.8	0	7.1537	2		1.01247	0.00538368	0.360889	0.442626		0	0	0	NaN	NaN		NaN	0	8.1	1	1	0.78448	0.98596	-0.0061407	4.8966	2	11.8	2	2	0.71725	1.0397	0.016908	21.487	2
	1882	Tb927.7.3710	Tb927.7.3710		hypothetical protein, conserved	51.815	22.5	0	52.459	1		1.01267	0.00546684	0.361694	0.441659		22.5	8	8	1.17963	1.07543	0.0315826	24.418	8	15.9	6	6	0.77482	0.97045	-0.0130268	12.895	7	10	4	4	0.68201	0.99505	-0.0021551	36.484	4
	622	Tb927.10.7240	Tb927.10.7240	kkt14	hypothetical protein, conserved	74.384	21.6	0	37.38	1		1.02274	0.00976462	0.361721	0.441626		15.9	7	7	1.08831	0.987459	-0.0054808	22.904	8	21.6	10	10	0.75577	0.95057	-0.0220159	79.891	11	10.2	4	4	0.79123	1.1397	0.0567905	8.5724	4
	404	Tb927.10.13870	Tb927.10.13870		tubulin tyrosine ligase protein, putative	50.357	4.8	0	4.5406	1		1.06702	0.0281721	0.362474	0.440723		0	0	0	NaN	NaN		NaN	0	4.8	2	2	0.75402	0.92699	-0.032925	31.058	2	3.2	1	1	0.85029	1.2282	0.0892691	NaN	1
	580	Tb927.10.5540	Tb927.10.5540		hypothetical protein, conserved	30.445	24.7	0	43.326	1	1	1.0055	0.00238356	0.36273	0.440416		24.7	8	8	1.12641	1.02133	0.00916396	23.473	9	19.2	7	7	0.78981	0.97864	-0.00937704	12.162	8	19.2	6	6	0.70647	1.0171	0.00736365	16.674	7
	2361	Tb927.9.5280	Tb927.9.5280		unspecified product	31.896	9.5	0	10.889	1	1	1.05539	0.023412	0.36293	0.440177		3.6	1	1	1.02952	0.938527	-0.0275535	NaN	1	3.6	1	1	NaN	NaN		NaN	0	5.8	1	1	0.81465	1.1868	0.0743775	NaN	1
	252	Tb927.1.2230;Tb927.1.2260	Tb927.1.2230;Tb927.1.2260		calpain-like protein fragment, putative;calpain-like protein fragment, putative	13.535	8.9	0	11.645	2		1.01677	0.00722116	0.363968	0.438936		8.9	1	1	1.19157	1.09634	0.0399433	NaN	1	8.9	1	1	0.80366	1.0095	0.00410632	NaN	1	8.9	1	1	0.65996	0.94976	-0.0223861	NaN	1
	1025	Tb927.11.4850	Tb927.11.4850		hypothetical protein, conserved	50.425	13.1	0	8.7299	1	1	1.04971	0.0210713	0.364046	0.438844		0	0	0	NaN	NaN		NaN	0	9.9	2	2	0.78935	0.94357	-0.0252259	7.7944	2	7.4	2	2	0.8035	1.1678	0.0673685	11.457	2
	511	Tb927.10.3080	Tb927.10.3080		methionine biosynthetic protein, putative	44.444	9.1	0	8.8311	1		1.05968	0.0251738	0.364884	0.437845		7.1	3	3	1.47512	1.33099	0.124175	46.119	3	9.1	4	4	0.87417	1.1075	0.0443437	15.962	4	5.3	2	2	0.55824	0.80724	-0.0929973	7.2908	2
	2026	Tb927.8.1910	Tb927.8.1910	ArgE	acetylornithine deacetylase, putative,metallo-peptidase, Clan MH, Family M18 (ArgE)	43.269	45.2	0	205.1	1		1.00854	0.00369183	0.365616	0.436975		45.2	17	17	1.15339	1.05064	0.0214543	12.477	23	43.9	15	15	0.79421	0.99978	-9.55553e-05	17.091	21	43.9	15	15	0.67814	0.9766	-0.0102833	11.049	18
	2395	Tb927.9.7190	Tb927.9.7190		oxidoreductase, putative	49.92	15.1	0	28.069	1	1	1.00334	0.00144987	0.366257	0.436214		10.6	4	4	1.10266	1.00012	5.21122e-05	12.362	4	11	4	4	0.81316	1.0196	0.00842983	8.2293	4	10.8	4	4	0.68865	0.99053	-0.00413237	6.6134	4
	504	Tb927.10.2830	Tb927.10.2830		hypothetical protein, conserved	15.258	8.1	0.0023267	3.0172	1		1.04756	0.0201809	0.366308	0.436154		8.1	1	1	0.923702	0.838434	-0.0765312	NaN	1	8.1	1	1	1.0025	1.2556	0.0988513	NaN	1	8.1	1	1	0.74929	1.092	0.0382226	NaN	1
	1265	Tb927.3.1230	Tb927.3.1230		hypothetical protein	104.52	9.3	0	11.482	1		1.03096	0.0132435	0.366752	0.435628		3.1	2	2	1.2855	1.20443	0.0807805	NaN	1	5.1	4	4	0.75332	0.94399	-0.0250326	12.235	4	3.5	2	2	0.64692	0.96379	-0.0160176	25.303	2
	741	Tb927.11.10960	Tb927.11.10960		hypothetical protein, conserved	71.772	39.8	0	111.82	1	1	1.00979	0.00423267	0.367477	0.43477		28.2	14	14	1.16585	1.05936	0.0250419	12.497	17	32.5	13	13	0.7754	0.97335	-0.011731	10.373	17	28.2	13	13	0.69373	0.99859	-0.000612787	11.497	16
	1090	Tb927.11.6630	Tb927.11.6630		3-methylcrotonoyl-CoA carboxylase beta subunit, putative	66.531	44.4	0	217.69	1	1	1.00697	0.0030144	0.367501	0.434741		34.5	14	14	1.05092	0.978761	-0.00932343	8.9564	18	43.1	17	17	0.79722	1.0024	0.00104106	8.5709	20	31.2	14	14	0.7054	1.0407	0.0173256	13.623	17
	195	Tb11.v5.0624;Tb927.6.160	Tb11.v5.0624		retrotransposon hot spot protein (PHS), putative	62.492	8.1	0	41.929	2		1.03793	0.0161692	0.368814	0.433193		8.1	4	1	1.04045	0.953198	-0.0208169	NaN	1	2.8	2	0	NaN	NaN		NaN	0	6.8	3	1	0.78075	1.1302	0.0531553	NaN	1
	1230	Tb927.2.4280	Tb927.2.4280		kinetoplastid-specific dual specificity phosphatase, putative	114.91	4.9	0	9.1415	1		1.01797	0.00773571	0.368862	0.433136		2.5	1	1	1.17722	1.10357	0.0427999	NaN	1	4.9	2	2	0.75345	0.93991	-0.0269137	11.976	2	2.5	1	1	0.70336	1.017	0.00732095	NaN	1
	1509	Tb927.4.4570	Tb927.4.4570		hypothetical protein, conserved	98.496	5.3	0	35.433	1		1.03092	0.013225	0.368885	0.433109		5.3	4	4	1.02449	0.928678	-0.032135	13.565	4	4	3	3	0.78345	0.97966	-0.00892462	7.6763	4	1.2	1	1	0.84694	1.2043	0.0807347	NaN	1
	1870	Tb927.7.3280	Tb927.7.3280		translation initiation factor IF-2, putative	79.66	8.7	0	17.149	1	1	1.06117	0.0257854	0.369285	0.432638		5.3	2	2	1.35733	1.2162	0.0850068	25.729	2	7.1	2	2	0.74289	0.9259	-0.0334359	15.524	2	0	0	0	NaN	NaN		NaN	0
	1803	Tb927.7.1230	Tb927.7.1230		hypothetical protein, conserved	92.929	4.5	0	4.2004	1		1.08975	0.0373282	0.369627	0.432237		1.9	1	1	1.86164	1.70451	0.231599	NaN	1	4.5	3	3	0.755	0.90948	-0.0412068	3.1035	3	1.2	1	1	0.58082	0.83482	-0.0784072	NaN	1
	732	Tb927.11.1070	Tb927.11.1070	gat3	glycosomal transporter (GAT3), putative (gat3)	75.51	8.3	0	12.416	1		1.03086	0.0132013	0.369896	0.431921		4.8	3	3	0.971345	0.885583	-0.0527709	7.1578	2	6.3	3	3	0.84232	1.0663	0.0278794	14.724	3	3.5	1	1	0.80846	1.1601	0.0644954	NaN	1
	2142	Tb927.8.6410	Tb927.8.6410		short-chain dehydrogenase, putative	52.913	12.7	0	87.366	1	1	1.00735	0.00318091	0.371484	0.43006		12.7	4	4	1.08776	0.989707	-0.00449336	31.488	5	9.5	3	3	0.78798	0.9862	-0.006035	13.667	3	9.5	3	3	0.72412	1.0473	0.0200711	9.6656	4
	718	Tb927.11.10240	Tb927.11.10240		hslVU complex proteolytic subunit, putative,hslVU complex proteolytic subunit, threonine peptidase, Clan T(1), family T1B	22.684	15.8	0	13.263	1	1	1.00566	0.00245047	0.372136	0.429298		15.8	3	3	1.11946	1.0353	0.0150679	5.1373	4	10	2	2	0.79433	0.99815	-0.000804189	2.3001	3	4.8	1	1	0.68384	0.98421	-0.00691223	NaN	1
	2134	Tb927.8.6190	Tb927.8.6190		hypothetical protein, conserved	9.6682	26.4	0	5.2468	1	1	1.07277	0.0305066	0.373542	0.427661		26.4	2	2	0.811096	0.744602	-0.128076	40.52	2	24.1	2	2	0.93207	1.1755	0.0702226	23.417	2	16.1	1	1	0.97543	1.4105	0.149373	NaN	1
	1538	Tb927.5.1000	Tb927.5.1000		ubiquitin-conjugating enzyme E2, putative,ubiquitin carrier protein, putative,ubiquitin-protein ligase, putative	16.766	16.2	0	10.434	1		1.0263	0.0112723	0.373675	0.427506		16.2	1	1	1.24629	1.12911	0.0527378	NaN	1	16.2	1	1	0.84621	1.0699	0.0293432	NaN	1	16.2	1	1	0.61924	0.89482	-0.0482643	NaN	1
	236	Tb927.1.120;Tb927.2.560;Tb11.v5.0295	Tb927.1.120		retrotransposon hot spot protein 4 (RHS4), putative	98.024	24.3	0	110.4	3		1.03518	0.015015	0.374746	0.426263		22.8	16	6	1.34705	1.23256	0.0908077	23.631	7	21.7	14	5	0.71718	0.89099	-0.0501272	11.928	8	13.3	10	3	0.70043	1.0101	0.00436437	19.273	3
	1184	Tb927.11.9930	Tb927.11.9930		NADH-ubiquinone oxidoreductase complex I subunit, putative	30.327	14.1	0	12.546	1	1	1.02055	0.00883436	0.374881	0.426107		7.8	2	2	0.998104	0.918949	-0.0367087	11.914	2	10.9	2	2	0.8278	1.0413	0.0175759	24.63	2	10.9	2	2	0.76746	1.1108	0.0456359	2.5495	2
	375	Tb927.10.12940	Tb927.10.12940		predicted zinc finger protein	34.477	15.1	0	5.8305	1		1.04206	0.017891	0.375663	0.425202		0	0	0	NaN	NaN		NaN	0	12.7	2	2	0.75275	0.94285	-0.0255574	NaN	1	12.3	2	2	0.7898	1.1517	0.0613394	19.118	2
	170	Tb927.10.10310;Tb11.v5.0446	Tb927.10.10310;Tb11.v5.0446		hypothetical protein, conserved;hypothetical protein, conserved	53.184	49.5	0	118.46	2	1	1.01326	0.00572259	0.378149	0.422337		44.1	12	12	1.20896	1.08938	0.037181	22.02	12	46.6	14	14	0.76085	0.96386	-0.015986	9.8224	15	37.2	10	10	0.68638	0.99077	-0.00402715	21.044	11
	196	Tb927.10.380;Tb11.v5.0637	Tb927.10.380;Tb11.v5.0637	PPR5	mitochondrial RNA binding complex 1 subunit (PPR5);hypothetical protein, conserved	39.683	4.1	0.0027397	2.7531	2	1	1.04071	0.0173302	0.378961	0.421405		4.1	1	1	0.92816	0.830841	-0.0804822	NaN	1	4.1	1	1	0.94679	1.186	0.0740847	14.977	2	4.1	1	1	0.78401	1.1439	0.0583881	NaN	1
	2368	Tb927.9.5700	Tb927.9.5700		hypothetical protein, conserved	238.85	10.3	0	110.95	1		1.00942	0.00407386	0.380648	0.419477		7.3	12	12	1.1699	1.06109	0.025751	22.885	14	8.9	15	15	0.7656	0.9672	-0.0144837	36.377	15	5.2	10	10	0.75029	1.0022	0.000954398	20.412	10
	1340	Tb927.3.3540	Tb927.3.3540	TbNup53b	Nucleoporin (TbNup53b)	52.878	17.2	0	36.26	1		1.01666	0.00717582	0.382026	0.417907		17.2	4	4	1.02467	0.933532	-0.0298706	11.284	4	17.2	4	4	0.81042	1.0208	0.00894066	23.076	4	12.9	3	3	0.7623	1.1027	0.0424574	21.153	3
	2415	Tb927.9.8210	Tb927.9.8210		Peptide deformylase 2	42.101	24.3	0	57.057	1	1	1.00853	0.00368782	0.382052	0.417878		24.3	6	6	1.04666	0.962927	-0.0164065	10.371	5	21	5	5	0.81005	1.0166	0.00715011	13.64	5	20.5	5	5	0.72809	1.0479	0.0203198	13.36	5
	1568	Tb927.5.1840	Tb927.5.1840		hypothetical protein, conserved	16.56	12.4	0	23.519	1		1.08917	0.0370945	0.383194	0.416581		0	0	0	NaN	NaN		NaN	0	12.4	1	1	0.70132	0.87214	-0.0594138	NaN	1	12.4	1	1	0.9399	1.3602	0.133603	NaN	1
	2232	Tb927.9.11770;Tb11.v5.0876	Tb927.9.11770		hypothetical protein, conserved	111.26	5.1	0	8.0444	2		1.05965	0.0251611	0.385797	0.413641		5.1	4	4	1.34232	1.23667	0.0922556	13.528	4	1	1	1	0.75043	0.90796	-0.0419333	NaN	1	0	0	0	NaN	NaN		NaN	0
	1733	Tb927.6.3860	Tb927.6.3860		hypothetical protein, conserved	44.312	8.2	0	8.4601	1		1.02444	0.010486	0.386274	0.413104		4.9	2	2	0.989805	0.900009	-0.0457531	NaN	1	6.1	2	2	0.81892	1.0306	0.0130901	2.3794	2	3.3	1	1	0.80344	1.1591	0.0641209	NaN	1
	1594	Tb927.5.3040	Tb927.5.3040		MIX protein	23.069	25.8	0	6.1562	1	1	1.01872	0.0080567	0.387366	0.411879		7.1	1	1	1.0296	0.950119	-0.0222221	NaN	1	16.2	2	2	0.77987	0.97617	-0.0104745	31.31	2	18.7	2	2	0.7815	1.1399	0.0568668	35.366	2
	1246	Tb927.2.5140	Tb927.2.5140		hypothetical protein, conserved	17.408	7.4	0	7.1656	1	1	1.05286	0.0223711	0.387422	0.411816		7.4	1	1	0.992162	0.915751	-0.0382226	NaN	1	7.4	1	1	0.9731	1.2105	0.0829648	NaN	1	0	0	0	NaN	NaN		NaN	0
	2330	Tb927.9.3280	Tb927.9.3280		acidocalcisomal exopolyphosphatase	42.865	47	0	158.4	1		1.00354	0.00153655	0.388712	0.410372		45.2	16	16	1.10547	1.02248	0.00965652	36.389	18	38.4	12	12	0.78735	0.98441	-0.00682398	15.452	16	40.2	13	13	0.69538	1.0041	0.00177697	15.13	18
	1104	Tb927.11.7140	Tb927.11.7140		cell cycle sequence binding phosphoprotein (RBP45), putative	35.476	9.6	0	10.425	1		1.26667	0.102663	0.388808	0.410265		3.2	1	1	5.63539	5.17491	0.713903	NaN	1	9.6	2	2	0.35026	0.43978	-0.356765	111.01	2	3.2	1	1	0.61226	0.893	-0.0491485	NaN	1
	361	Tb927.10.12520	Tb927.10.12520		hypothetical protein, conserved	94.523	17.4	0	72.25	1	1	1.00372	0.00161361	0.388847	0.410221		16.5	11	11	1.07149	0.981066	-0.008302	12.639	11	11.8	8	8	0.81643	1.018	0.00774778	7.899	11	7.8	5	5	0.70955	1.0125	0.00539503	13.273	6
	1899	Tb927.7.4140	Tb927.7.4140		hypothetical protein, conserved	20.852	41.5	0	21.337	1	1	1.01027	0.00443829	0.389664	0.409309		29.8	6	6	1.04977	0.957213	-0.0189916	16.925	6	22.3	5	5	0.80542	1.0076	0.00328816	14.331	5	19.1	4	4	0.73806	1.0691	0.0290183	8.0856	4
	1578	Tb927.5.2240;Tb927.5.2210;Tb927.5.2180	Tb927.5.2240;Tb927.5.2210;Tb927.5.2180		hypothetical protein, conserved;hypothetical protein, conserved;hypothetical protein, conserved	52.316	5.3	0.00048852	3.8066	3		1.02687	0.0115138	0.390218	0.408693		5.3	2	2	1.08443	0.972668	-0.0120354	18.529	2	2.1	1	1	0.94486	1.2093	0.0825341	NaN	1	5.3	2	2	0.62222	0.92054	-0.0359573	27.424	2
	748	Tb927.11.11200	Tb927.11.11200		oligomeric golgi complex component 8, putative	58.142	5	0	8.6176	1		1.04834	0.0205033	0.390254	0.408652		5	2	2	0.906865	0.831462	-0.0801573	5.602	2	5	2	2	1.1205	1.3821	0.140539	0.63867	2	2.3	1	1	0.70679	1.0026	0.0011277	NaN	1
	508	Tb927.10.2940	Tb927.10.2940		hypothetical protein, conserved	38.468	18.6	0	44.454	1		1.01589	0.00684615	0.390528	0.408348		12.4	3	3	1.01706	0.929368	-0.0318122	7.6829	3	18.6	4	4	0.8772	1.1035	0.0427723	13.972	4	14.7	3	3	0.69429	1.0223	0.00957836	13.214	3
	2125	Tb927.8.5900	Tb927.8.5900		hypothetical protein, conserved	14.715	18.6	0	6.0638	1		1.03982	0.0169579	0.392493	0.406168		18.6	2	2	1.02375	0.930406	-0.0313277	26.547	2	18.6	2	2	0.92103	1.1621	0.0652435	29.666	2	0	0	0	NaN	NaN		NaN	0
	2171	Tb927.8.740;Tb927.8.760	Tb927.8.740;Tb927.8.760	Nopp44/46	nucleolar RNA-binding protein, truncated;nucleolar RNA-binding protein (Nopp44/46)	12.663	12.9	0	4.2632	2		1.03657	0.0155984	0.392673	0.405969		12.9	2	2	1.01863	0.935629	-0.0288964	12.176	2	12.9	2	2	0.90805	1.1484	0.0600932	13.974	2	0	0	0	NaN	NaN		NaN	0
	1015	Tb927.11.4460	Tb927.11.4460	ALBA1	ALBA-Domain Protein (ALBA1)	14.038	22.4	0	8.0693	1		1.00669	0.00289496	0.393845	0.404675		22.4	2	2	1.16163	1.04881	0.0206976	13.064	2	22.4	2	2	0.7704	0.97419	-0.0113563	14.244	2	22.4	2	2	0.68465	0.99849	-0.00065628	14.792	2
	848	Tb927.11.14700	Tb927.11.14700		hypothetical protein, conserved	61.94	29.3	0	157.83	1	1	1.00523	0.00226625	0.394006	0.404497		24.1	10	10	1.16885	1.03223	0.0137748	9.3171	11	26	8	8	0.81658	1.0105	0.00453632	8.971	9	22.7	7	7	0.67708	0.97384	-0.0115124	9.1712	8
	1944	Tb927.7.5820	Tb927.7.5820		Monooxygenase, putative	55.086	27.6	0	166.19	1	1	1.00314	0.00135965	0.394497	0.403957		25.8	10	10	1.10402	1.02152	0.00924815	13.121	12	23.5	8	8	0.80292	1.0023	0.00099773	7.9391	9	22.9	8	8	0.67761	0.9859	-0.00616713	8.8099	9
	1341	Tb927.3.3550	Tb927.3.3550		hypothetical protein, conserved	128.86	21.5	0	85.756	1	1	1.00784	0.00339044	0.396254	0.402027		18.9	15	15	1.07068	0.979528	-0.00898323	10.172	17	15.5	13	13	0.78809	0.98445	-0.00680634	9.9453	17	11.2	9	9	0.72371	1.0616	0.0259609	24.533	8
	144	Tb927.10.5220;Tb11.v5.0235	Tb927.10.5220;Tb11.v5.0235		hypothetical protein, conserved;hypothetical protein, conserved	51.172	15.9	0	57.176	2	1	1.01483	0.00639254	0.396314	0.401961		15.9	5	5	1.12808	1.02263	0.00971895	15.181	6	13.6	4	4	0.88529	1.1004	0.0415506	23.534	5	6	2	2	0.6568	0.92877	-0.0320918	4.1072	3
	1756	Tb927.6.4460;Tb927.6.4410	Tb927.6.4460;Tb927.6.4410	AdoMetDC;AdoMetDC	S-adenosylmethionine decarboxylase (AdoMetDC);S-adenosylmethionine decarboxylase (AdoMetDC)	41.748	7.8	0.0035698	2.5251	2		1.09305	0.0386399	0.396809	0.401418		7.8	2	2	2.18488	1.98185	0.29707	105.83	2	7.8	2	2	0.66477	0.84191	-0.0747343	18.67	2	4.1	1	1	0.54226	0.78268	-0.106416	NaN	1
	1016	Tb927.11.4490	Tb927.11.4490		long-chain-fatty-acid-CoA ligase, putative,acyl-CoA synthetase, putative,fatty acid thiokinase (long chain), putative	73.435	4.2	0.00048828	3.7998	1	1	1.05841	0.0246543	0.397521	0.400639		4.2	2	2	1.41359	1.25478	0.098569	23.728	2	4.2	2	2	0.71233	0.89277	-0.0492604	1.6898	2	0	0	0	NaN	NaN		NaN	0
	1621	Tb927.5.3810	Tb927.5.3810		orotidine-5-phosphate decarboxylase/orotate phosphoribosyltransferase, putative,OMPDCase-OPRTase, putative	49.955	45.2	0	123.25	1		1.00608	0.00263101	0.399257	0.398748		36	16	16	1.04646	0.965531	-0.015234	6.6731	19	33.6	13	13	0.81833	1.0328	0.0140162	5.4295	17	33.8	12	12	0.70537	1.0212	0.00911081	14.924	12
	180	Tb11.v5.0524;Tb927.1.790	Tb11.v5.0524;Tb927.1.790		hypothetical protein, conserved;hypothetical protein, conserved	60.47	6.5	0	6.7371	2		1.06711	0.0282092	0.399622	0.398351		3.4	1	1	1.42187	1.3022	0.114678	NaN	1	0	0	0	NaN	NaN		NaN	0	6.5	2	2	0.60422	0.87446	-0.0582601	8.5779	2
	2398	Tb927.9.7260	Tb927.9.7260		hypothetical protein, conserved	41.248	15.6	0	12.206	1	1	1.02861	0.0122519	0.401363	0.396463		6.6	2	2	0.926441	0.843739	-0.0737917	8.5975	2	6.6	2	2	0.90847	1.1431	0.0580842	2.346	2	12.6	3	3	0.76342	1.1284	0.0524631	117.31	3
	1986	Tb927.7.7440	Tb927.7.7440		hypothetical protein, conserved	14.51	33.3	0	6.7347	1	1	1.0267	0.0114456	0.401839	0.395948		13	2	2	0.943574	0.866927	-0.0620176	55.666	2	26	2	2	0.83557	1.0446	0.01895	21.775	2	26	2	2	0.82395	1.1951	0.0774042	9.0556	2
	2350	Tb927.9.4360	Tb927.9.4360	KREL1	KREL1 (KREL1)	52.226	12.4	0	14.33	1	1	1.00684	0.00296005	0.401904	0.395878		12.4	7	7	1.12746	1.03823	0.0162927	14.472	7	6	3	3	0.76965	0.96013	-0.01767	9.7406	2	6	3	3	0.70269	1.0239	0.0102575	9.6224	2
	2417	Tb927.9.8290	Tb927.9.8290		hypothetical protein, conserved	25.114	32.1	0	12.057	1	1	1.00515	0.00223273	0.402079	0.395689		32.1	5	5	1.14508	1.04219	0.0179461	6.8459	6	28.4	4	4	0.78498	0.98369	-0.00714174	8.8947	4	28.4	4	4	0.68741	0.99059	-0.00410606	7.3741	4
	2025	Tb927.8.1890	Tb927.8.1890		cytochrome c1, heme protein, mitochondrial precursor	30.071	33.3	0	41.316	1	1	1.00326	0.00141239	0.403147	0.394537		21.3	5	5	1.12783	1.00838	0.00362422	10.625	6	33.3	7	7	0.78298	0.9812	-0.00824246	15.604	8	33.3	6	6	0.70418	1.0206	0.00885556	11.617	6
	2137	Tb927.8.630	Tb927.8.630		lipoate-protein ligase, putative,lipoyl ligase, putative,lipoyltransferase, putative,lipoate biosynthesis protein, putative	57.052	30.3	0	154.06	1	1	1.0133	0.00573987	0.403412	0.394251		23.2	9	9	0.997009	0.921659	-0.0354298	22.014	9	23.4	9	9	0.83578	1.0672	0.0282458	22.823	9	15.8	5	5	0.73151	1.0578	0.0244036	3.6603	6
	1715	Tb927.6.3100	Tb927.6.3100		hypothetical protein, conserved	48.134	7.8	0.002343	3.1513	1		1.0877	0.0365094	0.404434	0.393153		3.2	1	1	0.700035	0.636294	-0.196342	NaN	1	3.2	1	1	1.457	1.8314	0.262783	NaN	1	7.8	2	2	0.75134	1.1043	0.0430871	69.405	2
	639	Tb927.10.760	Tb927.10.760		hypothetical protein, conserved	29.887	40.5	0	57.439	1	1	1.01201	0.00518569	0.404726	0.392839		36.1	6	6	1.0718	0.980488	-0.00855758	10.528	5	32.5	5	5	0.88541	1.1029	0.0425361	22.354	5	36.9	6	6	0.66311	0.95847	-0.0184215	9.8671	6
	1187	Tb927.11.9990	Tb927.11.9990		glycosyl transferase-like protein	34.282	41.4	0	70.097	1		1.01316	0.00567678	0.405824	0.391662		21.8	5	5	1.19841	1.09234	0.0383558	11.873	4	33.9	6	6	0.74326	0.92615	-0.0333187	13.182	7	24.1	5	5	0.70841	1.028	0.0119931	22.2	6
	695	Tb927.10.9820;Tb11.v5.0565	Tb927.10.9820;Tb11.v5.0565		mitochondrial intermediate peptidase, putative,metallo-peptidase, Clan MA(E) Family M3;mitochondrial intermediate peptidase, putative	76.732	32.7	0	323.31	2	1	1.0029	0.00125606	0.406955	0.390454		25.6	12	12	1.11657	1.01557	0.00670944	10.923	15	31.6	16	16	0.80199	1.0119	0.0051376	17.79	18	28.9	13	13	0.67853	0.98157	-0.00807872	15.391	15
	1377	Tb927.3.4890	Tb927.3.4890		ubiquinone biosynthesis protein COQ7 homolog, putative	22.874	6.4	0.0023364	3.0821	1	1	1.04357	0.018522	0.408913	0.38837		6.4	1	1	1.3185	1.20635	0.0814715	NaN	1	0	0	0	NaN	NaN		NaN	0	6.4	1	1	0.62767	0.90276	-0.0444277	NaN	1
	1174	Tb927.11.9720	Tb927.11.9720		40S ribosomal protein S27, putative	9.6302	31.4	0	21.195	1		1.01098	0.00474337	0.411239	0.385905		31.4	2	2	1.0481	0.961723	-0.0169498	12.797	3	31.4	2	2	0.77326	0.97596	-0.010568	10.765	4	31.4	2	2	0.76379	1.1009	0.0417479	22.632	4
	510	Tb927.10.3010	Tb927.10.3010		hypothetical protein, conserved	133.39	4.8	0	13.167	1		1.01606	0.00691728	0.411407	0.385729		1.6	2	2	1.26121	1.14717	0.0596282	29.994	2	4	5	5	0.73772	0.9314	-0.0308638	10.468	4	1.7	2	2	0.67922	0.98172	-0.00801236	NaN	1
	2259	Tb927.9.13040	Tb927.9.13040		hypothetical protein, conserved	46.219	43.1	0	311.86	1	1	1.00432	0.00187329	0.412081	0.385018		37.3	11	11	1.11289	1.01999	0.00859677	20.506	13	38.3	11	11	0.81691	1.0232	0.00996053	18.836	14	41.4	11	11	0.67303	0.97065	-0.0129373	28.37	11
	1960	Tb927.7.6350	Tb927.7.6350		NADH-ubiquinone oxidoreductase, mitochondrial, putative	30.925	21.2	0	19.56	1	1	1.00362	0.00156763	0.412184	0.384909		21.2	5	5	1.13762	1.03241	0.0138509	1.8804	7	13.6	3	3	0.79202	0.99324	-0.0029458	2.2789	5	11	2	2	0.69384	0.98582	-0.00620238	7.0458	3
	198	Tb927.10.2890;Tb11.v5.0650	Tb927.10.2890;Tb11.v5.0650		enolase;enolase, putative	46.592	54.8	0	240.91	2		1.00477	0.00206873	0.412949	0.384104		47.8	16	16	1.05291	0.967212	-0.0144785	37.952	21	51.3	15	15	0.8142	1.0242	0.0103848	29.145	15	45	12	12	0.71251	1.024	0.0103	11.947	15
	1655	Tb927.6.1040;Tb927.6.1030	Tb927.6.1040;Tb927.6.1030	CP;CP	cysteine peptidase precursor,cysteine peptidase, Clan CA, family C1, Cathepsin L-like (CP);cysteine peptidase precursor,cysteine peptidase, Clan CA, family C1, Cathepsin L-like (CP)	48.358	8.2	0	30.994	2		1.02119	0.00910714	0.413598	0.383421		8.2	3	1	0.940645	0.86881	-0.0610753	NaN	1	8.2	3	1	0.91898	1.1557	0.0628451	NaN	1	6.5	2	1	0.7343	1.0606	0.0255516	NaN	1
	1168	Tb927.11.9650	Tb927.11.9650		hypothetical protein, conserved	53.172	15.5	0	26.791	1		1.00648	0.00280686	0.413784	0.383227		6.6	3	3	1.03512	0.955292	-0.0198637	28.79	3	12.2	4	4	0.82372	1.0341	0.0145625	10.41	4	15.5	5	5	0.70471	1.0321	0.0137218	11.927	5
	1614	Tb927.5.3570	Tb927.5.3570		hypothetical protein, conserved	29.735	10.6	0.00049068	3.886	1		1.01584	0.00682578	0.414191	0.3828		0	0	0	NaN	NaN		NaN	0	10.6	1	1	0.78009	0.95967	-0.0178781	NaN	1	10.6	1	1	0.73859	1.0753	0.0315296	NaN	1
	333	Tb927.10.11350	Tb927.10.11350		hypothetical protein, conserved	16.667	15	0	5.4308	1	1	1.02849	0.0122018	0.415712	0.381207		15	2	2	0.947867	0.869112	-0.0609244	3.2282	2	8.3	1	1	1.0141	1.2852	0.108971	NaN	1	8.3	1	1	0.67565	0.974	-0.011441	NaN	1
	1579	Tb927.5.2250;Tb927.5.2220;Tb927.5.2190	Tb927.5.2250;Tb927.5.2220;Tb927.5.2190		hypothetical protein, conserved;hypothetical protein, conserved;hypothetical protein, conserved	48.809	19.1	0	42.074	3		1.01488	0.00641605	0.416336	0.380556		15.9	5	5	1.17844	1.06637	0.0279083	26.032	5	19.1	6	6	0.70231	0.898	-0.0467237	16.131	7	11	3	3	0.74875	1.0916	0.0380635	0.34087	4
	1392	Tb927.3.5430	Tb927.3.5430		hypothetical protein, conserved	31.212	16.2	0	10.625	1		1.09804	0.0406164	0.416655	0.380223		7	2	2	0.553036	0.50221	-0.299115	162.55	2	11.8	3	3	1.2862	1.6407	0.215029	119	3	13.3	3	3	1.0922	1.6067	0.205935	22.224	4
	1898	Tb927.7.4110	Tb927.7.4110		kinesin, putative	95.104	4.8	0	6.6816	1		1.04845	0.0205485	0.416671	0.380207		1.6	1	1	0.847529	0.784806	-0.105238	NaN	1	1.6	1	1	0.76567	0.95926	-0.0180637	NaN	1	4.8	4	4	1.0537	1.5309	0.184947	26.278	3
	265	Tb927.1.3810	Tb927.1.3810		hypothetical protein, conserved	13.375	42.5	0	12.936	1		1.04972	0.0210742	0.417014	0.37985		42.5	3	3	0.776337	0.69935	-0.155306	26.671	2	42.5	3	3	1.0551	1.327	0.122871	19.61	2	7.5	1	1	0.86213	1.2464	0.0956574	NaN	1
	632	Tb927.10.7500	Tb927.10.7500	NOP1	fibrillarin (NOP1)	31.643	13.7	0	8.6822	1		1.02076	0.00892191	0.417427	0.37942		13.7	3	3	1.19148	1.0828	0.034549	12.38	3	13.7	3	3	0.87857	1.1415	0.0574759	7.6329	3	13.7	3	3	0.59483	0.86048	-0.0652592	15.229	3
	166	Tb11.v5.0410;Tb927.4.2070;Tb11.v5.0881	Tb11.v5.0410;Tb927.4.2070;Tb11.v5.0881		antigenic protein, conserved;antigenic protein, putative;antigenic protein, putative	200.51	31.2	0	18.948	3		1.02966	0.012693	0.417781	0.379052		22.9	2	2	1.01838	0.921829	-0.0353497	NaN	1	29.3	2	2	0.92068	1.1501	0.0607356	11.116	3	0	0	0	NaN	NaN		NaN	0
	2242	Tb927.9.12160	Tb927.9.12160		hypothetical protein, conserved	66.99	7.4	0	16.463	1		1.00877	0.00379133	0.418131	0.378688		7.4	3	3	1.11463	0.9998	-8.68676e-05	40.244	3	2.2	1	1	0.75099	0.95051	-0.0220433	NaN	1	2.2	1	1	0.75133	1.0802	0.0335042	NaN	1
	877	Tb927.11.1570	Tb927.11.1570		hypothetical protein, conserved	36.792	7.3	0	7.2642	1		1.02637	0.0113025	0.41866	0.378138		7.3	1	1	1.57354	1.13388	0.0545659	4.9067	2	7.3	1	1	0.71248	0.92905	-0.0319609	6.2486	2	0	0	0	NaN	NaN		NaN	0
	1036	Tb927.11.510;Tb927.11.500	Tb927.11.510;Tb927.11.500	UBP1;UBP2	RNA-binding protein, UBP2 (UBP2);RNA-binding protein, UBP1 (UBP1)	19.559	17.7	0	95.247	2		1.00625	0.00270596	0.418678	0.37812		17.7	3	3	1.03165	0.95429	-0.0203198	7.7054	4	17.7	3	3	0.82065	1.0272	0.011655	10.215	4	13.1	2	2	0.70706	1.0394	0.0167827	25.259	3
	1598	Tb927.5.3140	Tb927.5.3140		hypothetical protein, conserved	25.738	15.3	0	8.1544	1		1.04919	0.0208546	0.41916	0.37762		9.7	2	2	0.952835	0.871992	-0.0594877	74.345	2	0	0	0	NaN	NaN		NaN	0	11.6	2	2	0.87153	1.2624	0.101197	51.075	2
	1020	Tb927.11.4630	Tb927.11.4630		hypothetical protein, conserved	49.642	5	0	5.2878	1		1.07775	0.0325199	0.420054	0.376695		2.5	1	1	0.868282	0.804959	-0.0942265	NaN	1	0	0	0	NaN	NaN		NaN	0	2.5	1	1	0.97853	1.443	0.159266	NaN	1
	699	Tb927.10.9890;Tb11.v5.0458	Tb927.10.9890		hypothetical protein, conserved	97.192	11.9	0	32.005	2		1.0157	0.00676706	0.421268	0.375442		8.7	5	5	0.956846	0.884643	-0.0532321	6.7565	5	5.7	3	3	0.88081	1.0916	0.0380635	5.4611	4	9.1	5	5	0.74488	1.0851	0.0354698	16.288	5
	1166	Tb927.11.9600	Tb927.11.9600		hypothetical protein, conserved	34.241	6.1	0	7.1826	1	1	1.06037	0.0254587	0.42157	0.375131		6.1	1	1	0.94697	0.839913	-0.0757659	NaN	1	0	0	0	NaN	NaN		NaN	0	6.1	1	1	0.90906	1.3387	0.126683	NaN	1
	281	Tb927.1.5030	Tb927.1.5030		leucine-rich repeat protein (LRRP), putative	80.773	12	0	50.648	1		1.01918	0.00825158	0.42196	0.374729		7.3	4	4	1.28373	1.17596	0.0703922	5.5967	4	8.6	3	3	0.70769	0.87624	-0.0573769	5.5931	4	8.6	3	3	0.71163	1.0274	0.0117396	23.412	4
	1132	Tb927.11.870	Tb927.11.870		hypothetical protein, conserved	28.776	26	0	22.733	1	1	1.00555	0.0024041	0.422269	0.374411		26	6	6	1.07243	0.965624	-0.015192	11.737	6	22.8	5	5	0.83465	1.0521	0.022057	10.939	5	14.2	3	3	0.6889	1.0008	0.000347297	5.9223	3
	835	Tb927.11.14150	Tb927.11.14150		hypothetical protein, conserved	24.523	14.5	0	5.8975	1		1.04233	0.0180058	0.422909	0.373753		5.1	1	1	0.972479	0.88129	-0.054881	NaN	1	14.5	3	3	0.98355	1.2328	0.0908926	13.427	2	0	0	0	NaN	NaN		NaN	0
	1481	Tb927.4.3640;Tb927.4.3630;Tb927.4.3620	Tb927.4.3640;Tb927.4.3630;Tb927.4.3620	PP1-6;PP1-5;PP1-4	protein phosphatase 1, putative;protein phosphatase 1, putative;protein phosphatase 1, putative	33.577	6.8	0	5.9184	3		1.01861	0.00800947	0.42316	0.373495		6.8	2	2	1.0042	0.920895	-0.0357898	27.123	2	6.8	2	2	0.9616	1.2031	0.0803017	29.502	2	3.1	1	1	0.65383	0.95393	-0.0204835	NaN	1
	1738	Tb927.6.4040	Tb927.6.4040		hypothetical protein, conserved	28.009	16.6	0	21.819	1	1	1.01158	0.00500016	0.427264	0.369304		16.6	5	5	1.29011	1.12722	0.0520079	22.842	5	16.2	4	4	0.73848	0.93908	-0.0272974	1.4009	3	16.6	5	5	0.67734	0.97789	-0.00970999	7.8026	4
	1136	Tb927.11.880	Tb927.11.880	CYPA	cyclophilin a,cyclophilin type peptidyl-prolyl cis-trans isomerase (CYPA)	18.717	21.5	0	7.3723	1		1.02002	0.00861081	0.427328	0.369239		21.5	3	3	1.19748	1.09145	0.038005	25.426	3	13	2	2	0.67958	0.84487	-0.0732101	0.066727	2	15.3	2	2	0.79322	1.1509	0.0610376	22.516	2
	244	Tb927.1.1730	Tb927.1.1730		hypothetical protein, conserved	75.065	39.2	0	233.6	1	1	1.00314	0.0013609	0.427782	0.368778		39.2	17	17	1.08988	0.9996	-0.000173666	23.363	24	38	16	16	0.81686	1.0315	0.0134692	23.416	22	29.9	12	12	0.67956	0.97901	-0.00921287	11.148	16
	1542	Tb927.5.1090	Tb927.5.1090	ThrRS	threonyl-tRNA synthetase, putative	90.983	6.5	0	18.777	1	1	1.03126	0.0133687	0.427813	0.368746		2	1	1	1.49842	1.36799	0.136083	NaN	1	5.3	3	3	0.66203	0.82407	-0.0840359	11.042	2	6.5	4	4	0.68418	0.97288	-0.0119407	21.452	3
	1052	Tb927.11.5510	Tb927.11.5510		dynein light chain p28, axonemal, putative	27.371	20.9	0	52.015	1		1.00412	0.0017869	0.428673	0.367874		20.9	4	4	1.08711	0.988924	-0.00483704	27.802	4	20.9	4	4	0.83408	1.0451	0.0191578	6.8621	4	15.3	3	3	0.6753	0.97958	-0.00896009	45.27	3
	424	Tb927.10.14590	Tb927.10.14590		hypothetical protein, conserved	33.674	10.3	0	5.4374	1	1	1.01473	0.0063518	0.428983	0.36756		10.3	3	3	1.08638	0.951384	-0.0216441	9.9756	3	7.7	2	2	0.89617	1.0823	0.0343477	16.487	2	0	0	0	NaN	NaN		NaN	0
	1796	Tb927.7.1060	Tb927.7.1060		hypothetical protein, conserved	53.733	11.3	0	9.3912	1		1.04667	0.0198108	0.429021	0.367522		3.2	1	1	0.934929	0.855944	-0.0675544	NaN	1	8.1	3	3	1.0145	1.2799	0.107176	32.071	3	0	0	0	NaN	NaN		NaN	0
	956	Tb927.11.2620	Tb927.11.2620		hypothetical protein, conserved	68.718	13.2	0	17.118	1		1.01248	0.00538649	0.429977	0.366555		7.2	4	4	1.00095	0.910747	-0.0406023	10.431	3	9.2	5	5	0.80156	1.0095	0.00410632	9.1092	6	13.2	6	6	0.77413	1.1289	0.0526555	24.684	6
	2344	Tb927.9.3990;Tb927.9.3920	Tb927.9.3990;Tb927.9.3920		ribosomal protein S7, putative;ribosomal protein S7, putative	23.841	16.8	0	4.132	2		1.02276	0.00977214	0.430372	0.366156		0	0	0	NaN	NaN		NaN	0	16.8	2	2	0.90615	1.1317	0.0537313	28.213	3	10.9	1	1	0.63474	0.9243	-0.034187	NaN	1
	651	Tb927.10.8030	Tb927.10.8030		hypothetical protein, conserved	28.834	54.9	0	153.22	1	1	1.00727	0.00314476	0.430536	0.365991		54.9	15	15	1.18268	1.08345	0.0348077	2.8977	22	47.1	13	13	0.7654	0.96819	-0.0140394	9.8113	19	52.5	15	15	0.67597	0.97424	-0.011334	9.4699	21
	139	Tb11.v5.0201;Tb927.10.6090	Tb11.v5.0201;Tb927.10.6090		tRNA pseudouridine synthase A, putative;tRNA pseudouridine synthase A, putative	69.188	5.7	0	4.0834	2	1	1.0394	0.0167844	0.431063	0.365459		5.7	2	2	1.30995	1.21445	0.0843786	3.1889	2	5.7	2	2	1.0525	1.3139	0.118562	20.96	2	5.7	2	2	0.48677	0.70374	-0.152588	7.3988	2
	851	Tb927.11.14770	Tb927.11.14770		hypothetical protein, conserved	27.841	21	0	39.112	1		1.01408	0.00607265	0.432033	0.364483		21	3	3	1.19336	1.08163	0.0340791	15.36	3	16.7	2	2	0.76337	0.95075	-0.0219337	40.996	2	0	0	0	NaN	NaN		NaN	0
	401	Tb927.10.13810	Tb927.10.13810		hypothetical protein, conserved	12.955	21.2	0	6.7929	1	1	1.02202	0.00945804	0.432553	0.363961		21.2	2	2	0.996413	0.923617	-0.0345081	8.9534	2	11.5	1	1	0.91429	1.1309	0.0534242	NaN	1	0	0	0	NaN	NaN		NaN	0
	1066	Tb927.11.5960;Tb927.11.5950	Tb927.11.5960;Tb927.11.5950		hypothetical protein, conserved;hypothetical protein, conserved	11.278	21.5	0	44.065	2		1.01745	0.00751328	0.434966	0.361545		21.5	2	2	1.21656	1.10605	0.043774	11.086	3	21.5	2	2	0.75725	0.93595	-0.0287474	4.0009	3	0	0	0	NaN	NaN		NaN	0
	1693	Tb927.6.2420	Tb927.6.2420		p22 protein precursor	25.349	25.1	0	15.761	1	1	1.00531	0.00230164	0.436249	0.360266		18.1	3	3	1.04899	0.956206	-0.0194486	17.915	4	25.1	4	4	0.79463	1.0045	0.00194994	43.563	4	14.5	2	2	0.72244	1.0578	0.0244036	5.5441	2
	2131	Tb927.8.6110	Tb927.8.6110	HMGS	hypothetical protein, conserved	54.669	44.9	0	267.87	1	1	1.00532	0.00230221	0.437151	0.359368		27.9	12	12	1.09498	0.995818	-0.0018202	2.3078	16	35.3	13	13	0.84472	1.0625	0.0263289	11.68	16	39.1	15	15	0.67444	0.96028	-0.0176021	10.374	22
	2118	Tb927.8.5610	Tb927.8.5610		hypothetical protein, conserved	54.81	7.8	0	15.429	1		1.00434	0.00188072	0.43984	0.356705		7.8	3	3	1.12044	1.03241	0.0138509	2.3208	3	7.8	3	3	0.79104	1.0276	0.0118241	9.4449	3	7.8	3	3	0.65622	0.95492	-0.020033	15.825	3
	1157	Tb927.11.9420	Tb927.11.9420		ATP synthase, putative	24.788	18.5	0	39.971	1		1.01251	0.00540108	0.440864	0.355696		7.4	1	1	1.16031	1.0573	0.0241962	NaN	1	18.5	3	3	0.8872	1.1197	0.0491017	4.973	2	13.9	2	2	0.60992	0.87681	-0.0570945	5.0138	3
	1599	Tb927.5.3170	Tb927.5.3170	PRPS5	ribose-phosphate pyrophosphokinase, putative (PRPS5)	39.188	9	0	8.0475	1		1.0194	0.00834325	0.440881	0.355679		2.8	1	1	0.947059	0.854847	-0.0681116	NaN	1	9	2	2	0.78141	0.9817	-0.00802121	8.3867	2	9	2	2	0.87891	1.2623	0.101163	52.914	2
	1516	Tb927.4.4940	Tb927.4.4940		hypothetical protein, conserved	73.839	7.5	0	12.005	1		1.01533	0.00660764	0.441584	0.354986		1.5	1	1	1.26472	1.1517	0.0613401	NaN	1	3	2	2	0.85084	1.0693	0.0290996	NaN	1	3	1	1	0.58101	0.84993	-0.0706168	NaN	1
	1713	Tb927.6.3050	Tb927.6.3050		aldehyde dehydrogenase family, putative	59.689	22.1	0	64.579	1	1	1.00685	0.00296553	0.441843	0.354732		17.1	7	7	1.11	0.993246	-0.00294322	32.091	7	16.4	5	5	0.84488	1.0877	0.0365091	33.288	5	16.4	5	5	0.66971	0.94478	-0.0246693	28.162	5
	1334	Tb927.3.3340	Tb927.3.3340	PDED	3, 5-cyclic nucleotide phosphodiesterase, putative (PDED)	76.602	5.5	0	6.1147	1		1.15498	0.0625739	0.441866	0.35471		3.1	2	2	0.281809	0.259363	-0.586092	194.71	2	2.4	1	1	4.2482	5.2855	0.723086	NaN	1	1.5	1	1	0.76577	1.1239	0.0507277	NaN	1
	690	Tb927.10.9560	Tb927.10.9560		oxidoreductase, putative	36.099	38.9	0	178.44	1		1.00358	0.00155199	0.442751	0.35384		38.6	7	7	1.04866	0.969932	-0.0132587	6.2862	9	38.6	7	7	0.83554	1.0455	0.019324	2.7704	9	35.3	7	7	0.6938	0.99676	-0.0014094	12.476	8
	1686	Tb927.6.2220	Tb927.6.2220		hypothetical protein, conserved	14.871	47.3	0	13.374	1		1.01367	0.00589864	0.443083	0.353515		37.2	3	3	1.21277	1.12342	0.0505418	21.929	2	25.6	2	2	0.86197	1.0799	0.0333835	10.096	2	35.7	3	3	0.58846	0.85856	-0.0662293	12.66	3
	295	Tb927.10.10120	Tb927.10.10120		hypothetical protein, conserved	63.236	6.4	0	14.281	1	1	1.0206	0.0088556	0.443319	0.353283		5.1	2	2	1.42696	1.31323	0.118341	15.012	2	6.4	3	3	0.72927	0.91385	-0.0391251	16.332	4	3.1	1	1	0.6135	0.88583	-0.0526496	7.1686	2
	2099	Tb927.8.4930	Tb927.8.4930		hypothetical protein, conserved	33.895	18.4	0	9.7375	1	1	1.02098	0.00901724	0.444033	0.352585		18.4	3	3	1.19489	1.09771	0.0404864	33.959	3	18.4	3	3	0.9809	1.2231	0.087462	128.55	3	9.8	1	1	0.54406	0.79269	-0.100897	NaN	1
	702	Tb927.10.9950	Tb927.10.9950		hypothetical protein, conserved	44.06	17	0	7.3878	1		1.05338	0.0225836	0.444066	0.352553		11.4	3	3	2.08351	1.91117	0.281299	42.816	3	10.2	3	3	0.76842	0.9864	-0.00594694	10.049	2	6.3	2	2	0.42111	0.62001	-0.207601	NaN	1
	178	Tb927.10.660;Tb11.v5.0500	Tb927.10.660;Tb11.v5.0500		2-oxoisovalerate dehydrogenase alpha subunit, putative;2-oxoisovalerate dehydrogenase alpha subunit, putative	46.369	48.1	0	323.31	2	1	1.00159	0.000688948	0.445698	0.350959		48.1	17	17	1.10814	1.01383	0.00596471	13.338	27	48.1	17	17	0.78626	0.98135	-0.00817607	11.674	27	34.9	13	13	0.70523	1.0099	0.00427837	4.9283	22
	1550	Tb927.5.1370	Tb927.5.1370	PPIase	cyclophilin-type peptidyl-prolyl cis-trans isomerase, putative,PPIase, putative,rotamase, putative,cyclosporin A-binding protein, putative,peptidyl-prolyl cis-trans isomerase, putative (PPIase)	25.562	11.4	0	6.1409	1	1	1.02173	0.00933554	0.446335	0.350339		11.4	2	2	1.46877	1.34438	0.12852	0.23908	2	11.4	2	2	0.67458	0.84334	-0.0739973	NaN	1	3.8	1	1	0.64867	0.94077	-0.0265165	NaN	1
	530	Tb927.10.370	Tb927.10.370		calcineurin B subunit, putative	19.872	35.8	0	91.423	1		1.0013	0.00056318	0.446795	0.349891		35.8	4	4	1.10533	1.00181	0.000786663	7.0876	6	35.8	4	4	0.81142	1.016	0.00689371	13.996	5	29.6	3	3	0.6858	0.9863	-0.00599097	39.625	4
	2152	Tb927.8.6640	Tb927.8.6640		hypothetical protein, conserved	67.498	23.7	0	116.5	1		1.0101	0.00436626	0.44871	0.348034		23.7	9	9	1.01876	0.93835	-0.027635	27.894	9	18.9	7	7	0.76716	0.94741	-0.023462	10.398	7	11.9	4	4	0.8008	1.1593	0.0641958	20.628	5
	742	Tb927.11.11050	Tb927.11.11050		hypothetical protein, conserved	37.475	29.3	0	110.43	1	1	1.00165	0.000715878	0.450508	0.346298		29.3	9	9	1.06779	0.985513	-0.00633769	11.802	12	25.7	7	7	0.7929	0.99515	-0.00211145	7.043	10	23.7	7	7	0.71683	1.0247	0.0105967	27.264	10
	386	Tb927.10.13300	Tb927.10.13300		30S ribosomal protein S8, putative	32.681	12.8	0	6.0191	1	1	1.06357	0.0267671	0.450601	0.346207		7.4	2	2	0.785793	0.717257	-0.144325	NaN	1	12.8	3	3	1.2503	1.5771	0.197859	50.153	3	0	0	0	NaN	NaN		NaN	0
	746	Tb927.11.11120	Tb927.11.11120		hypothetical protein, conserved	22.452	43.9	0	95.206	1	1	1.00524	0.00227176	0.450609	0.3462		34.3	6	6	1.03095	0.936593	-0.0284493	8.8424	6	34.3	6	6	0.81876	1.0205	0.00881301	10.481	6	15.2	2	2	0.73585	1.0628	0.0264515	11.876	3
	449	Tb927.10.1550	Tb927.10.1550	RPN5	proteasome regulatory non-ATP-ase subunit 5,19S proteasome regulatory subunit (RPN5)	54.896	6	0	15.002	1		1.0191	0.0082159	0.451018	0.345806		6	2	2	0.857559	0.780457	-0.107651	12.357	2	6	2	2	0.89986	1.1134	0.0466512	32.051	3	6	2	2	0.84462	1.218	0.0856473	23.724	3
	226	Tb927.10.3340;Tb11.v5.1022	Tb927.10.3340;Tb11.v5.1022		protein kinase, putative;protein kinase, putative	98.706	16.6	0	57.548	2		1.01186	0.00511877	0.451853	0.345003		7	4	4	1.01724	0.937295	-0.0281237	24.565	3	13.6	7	7	0.73449	0.91978	-0.036316	18.766	6	6.4	3	3	0.82499	1.2017	0.0797961	21.867	4
	801	Tb927.11.13180	Tb927.11.13180		hypothetical protein conserved	61.21	29.1	0	148.64	1		1.00227	0.000986098	0.454298	0.342659		29.1	10	10	1.15555	1.03748	0.0159814	10.511	15	24.3	8	8	0.77635	0.98993	-0.00439551	14.455	11	24.1	8	8	0.67976	0.98033	-0.00862771	8.2505	14
	1662	Tb927.6.1440	Tb927.6.1440		hypothetical protein, conserved	29.996	29.8	0	44.804	1		1.00542	0.00234803	0.454623	0.342349		26.4	5	5	1.02478	0.933968	-0.0296678	4.3662	5	29.8	6	6	0.79645	1.0076	0.00328816	19.155	7	13.6	2	2	0.75065	1.08	0.0334238	4.6969	2
	232	Tb927.1.1000	Tb927.1.1000		developmentally regulated phosphoprotein	47.206	23.8	0	111.51	1	1	1.00388	0.00168134	0.454953	0.342034		21.7	8	8	1.03015	0.945269	-0.0244446	7.1806	9	21.4	7	7	0.82265	1.0286	0.0122465	8.281	8	20.7	6	6	0.72186	1.0405	0.0172421	16.181	6
	897	Tb927.5.1110;Tb927.11.16280	Tb927.5.1110;Tb927.11.16280		60S ribosomal protein L2, putative,60S ribosomal protein L8, putative;60S ribosomal protein L2, putative,60S ribosomal protein L8, putative	28.314	18.8	0	23.112	2		1.02486	0.0106653	0.455442	0.341567		10	1	1	1.62104	1.48794	0.172585	NaN	1	18.8	2	2	0.75055	0.93397	-0.0296671	6.3757	2	10	1	1	0.54359	0.7746	-0.110923	NaN	1
	2256	Tb927.9.12900	Tb927.9.12900		RNA polymerase-associated protein LEO1, putative	64.969	4	0	7.6504	1		1.15482	0.0625145	0.455474	0.341536		1.9	1	1	0.456017	0.415455	-0.381476	NaN	1	0	0	0	NaN	NaN		NaN	0	2.1	1	1	2.2372	3.21	0.506505	NaN	1
	666	Tb927.10.8430	Tb927.10.8430		40S ribosomal protein S12, putative	16.061	30.3	0	133.48	1		1.00218	0.000947109	0.456148	0.340894		30.3	3	3	1.05619	0.967867	-0.0141844	10.268	4	30.3	3	3	0.81899	1.023	0.00987563	12.503	4	30.3	3	3	0.70713	1.0166	0.00715011	40.331	4
	640	Tb927.10.7610	Tb927.10.7610		hypothetical protein, conserved	165.1	22.2	0	164.93	1	1	1.00376	0.00162805	0.456404	0.34065		20.7	21	21	1.05736	0.95648	-0.0193241	12.356	24	16.3	16	16	0.79348	0.99616	-0.0016709	12.55	16	18.6	18	18	0.72196	1.0614	0.0258791	15.599	17
	108	Tb927.10.10280;Tb10.v4.0053;Tb10.v4.0052;Tb927.10.10360	Tb927.10.10280;Tb10.v4.0053;Tb10.v4.0052;Tb927.10.10360		microtubule-associated protein, putative;hypothetical protein,chrX additional, unordered contigs;microtubule-associated protein 2,chrX additional, unordered contigs;microtubule-associated protein, putative	267.6	66.5	0	25.76	4		1.00619	0.00267813	0.456574	0.340489		63.8	3	3	1.15923	1.05937	0.0250464	18.404	3	66.5	4	4	0.71237	0.91042	-0.0407582	16.32	4	63.8	3	3	0.71848	1.0562	0.0237462	8.853	5
	169	Tb927.10.15850;Tb11.v5.0427	Tb927.10.15850;Tb11.v5.0427	PEX12	peroxin 12 (PEX12);peroxisome assembly protein, putative	43.172	21.3	0	48.851	2		1.00429	0.00185698	0.457478	0.33963		17.7	6	6	1.14147	1.03689	0.0157339	20.339	6	21.3	7	7	0.72024	0.9357	-0.0288634	31.908	7	17.7	6	6	0.71873	1.044	0.0187005	11.858	6
	761	Tb927.11.11590	Tb927.11.11590		eukaryotic translation initiation factor, putative	46.677	22.8	0	59.126	1		1.02418	0.0103748	0.458263	0.338885		6.1	2	2	1.66859	1.5329	0.185513	14.081	2	19.1	4	4	0.67144	0.83307	-0.0793185	27.856	4	14	3	3	0.71172	0.84126	-0.0750698	26.933	3
	1752	Tb927.6.4300;Tb927.6.4280;Tb927.10.6880;Tb11.v5.0516	Tb927.6.4300;Tb927.6.4280	GAP;GAPDH;GAPDH	glyceraldehyde 3-phosphate dehydrogenase, glycosomal (GAPDH);glyceraldehyde 3-phosphate dehydrogenase, glycosomal (GAPDH)	39.047	65.7	0	314.81	4		1.0019	0.000824715	0.459232	0.337968		57.9	19	19	1.05623	0.970309	-0.0130901	10.823	31	62.7	20	20	0.81925	1.0244	0.0104696	6.6226	37	54.9	17	17	0.69939	1.0118	0.00509468	8.5186	27
	489	Tb927.10.2440	Tb927.10.2440	MCA4	metacaspase MCA4,cysteine peptidase, Clan CD, family C13, putative (MCA4)	38.969	4	0	4.0393	1		1.02227	0.00956769	0.459242	0.337959		4	1	1	0.746102	0.69847	-0.155852	NaN	1	4	1	1	0.99644	1.2423	0.0942265	NaN	1	4	1	1	0.83763	1.2312	0.0903286	NaN	1
	1201	Tb927.2.2470	Tb927.2.2470	KREPA1	RNA-editing complex protein,KREPA1 (KREPA1)	81.293	11.8	0	57.363	1	1	1.00786	0.00340058	0.459555	0.337662		11.8	5	5	0.984834	0.879353	-0.0558368	10.95	6	7.3	3	3	0.85368	1.0756	0.0316508	3.5022	4	7.1	3	3	0.7408	1.0824	0.0343878	3.7188	3
	1101	Tb927.11.700;Tb11.0860	Tb927.11.700		hypothetical protein, conserved	38.697	11.3	0	10.71	2		1.01857	0.00799011	0.460574	0.336701		3.4	1	1	1.5702	1.388	0.14239	NaN	1	11.3	3	3	0.76432	0.961	-0.0172766	23.851	4	7.9	2	2	0.54886	0.79224	-0.101143	15.103	2
	766	Tb927.11.11690	Tb927.11.11690		vacuolar ATP synthase subunit b, putative,v- ATPase B subunit,vacuolar proton pump B subunit	55.619	8.7	0	9.6139	1		1.00684	0.00295874	0.460968	0.336329		8.7	3	3	1.00471	0.904241	-0.0437159	8.7894	3	4	1	1	0.88612	1.119	0.0488301	NaN	1	6.1	2	2	0.69187	1.0087	0.00376202	4.4508	2
	600	Tb927.10.6230	Tb927.10.6230		MORN repeat containing protein	77.026	11.7	0	18.856	1		1.01407	0.00606769	0.464238	0.333259		3.8	2	2	1.42007	1.28728	0.109674	16.069	2	5.4	3	3	0.66454	0.79874	-0.0975946	55.325	2	8.6	4	4	0.69481	1.0142	0.00612361	32.327	4
	1771	Tb927.6.4930	Tb927.6.4930		hypothetical protein, conserved	30.051	15.8	0	7.7486	1	1	1.00209	0.000905385	0.464244	0.333254		11.7	3	3	1.11621	1.03304	0.0141155	30.561	3	6.9	2	2	0.77416	0.96359	-0.0161077	5.3923	2	15.8	4	4	0.70355	1.0109	0.0047082	10.105	4
	1708	Tb927.6.2800	Tb927.6.2800		hypothetical protein, conserved	96.853	9.2	0	24.715	1		1.01064	0.00459622	0.464263	0.333236		2.2	1	1	NaN	NaN		NaN	0	5.3	3	3	0.90485	1.1101	0.0453621	8.4496	2	4.3	2	2	0.64325	0.92009	-0.0361697	4.9467	2
	1225	Tb927.2.4130	Tb927.2.4130		enoyl-CoA hydratase/Enoyl-CoA isomerase/3-hydroxyacyl-CoA dehydrogenase, putative	88.9	9.7	0	20.778	1		1.00625	0.00270453	0.464691	0.332835		6.6	4	4	0.976276	0.897344	-0.0470411	2.441	4	6.2	4	4	0.81357	1.0217	0.00932339	7.7336	3	3.1	2	2	0.77069	1.1113	0.0458313	15.399	2
	242	Tb927.1.1580	Tb927.1.1580		cytochrome c oxidase assembly factor, putative,electron transport protein SCO1/2, putative	33.578	21.9	0	30.477	1	1	1.00194	0.000840508	0.465008	0.33254		14.3	4	4	1.13986	1.03485	0.0148791	5.0125	4	17.9	5	5	0.79565	1.0047	0.0020364	3.2039	5	14.3	4	4	0.66666	0.9674	-0.0143939	5.1667	4
	840	Tb927.11.14430	Tb927.11.14430		proteasome regulatory non-ATP-ase subunit	31.281	8.8	0.0014388	3.5338	1		1.01362	0.00587507	0.465122	0.332433		2.6	1	1	1.30757	1.20793	0.0820432	NaN	1	6.2	1	1	0.88138	1.1137	0.0467682	NaN	1	8.8	2	2	0.53205	0.77413	-0.111186	19.813	2
	831	Tb927.11.14080	Tb927.11.14080	CYC2	cyclin 2,G1 cyclin (CYC2)	24.301	21.3	0	98.733	1		1.02405	0.0103191	0.465246	0.332317		21.3	2	2	1.79921	1.65653	0.2192	56.754	2	15.2	1	1	0.62298	0.78089	-0.10741	NaN	1	15.2	1	1	0.57205	0.83017	-0.080833	NaN	1
	544	Tb927.10.4080	Tb927.10.4080		hypothetical protein, conserved	127.1	22.1	0	72.664	1	1	1.00223	0.000967958	0.466713	0.33095		22.1	11	11	1.14973	1.05035	0.0213357	13.485	13	20.5	10	10	0.77693	0.98383	-0.00707994	21.205	11	15.6	4	4	0.67186	0.9742	-0.0113519	9.29	4
	329	Tb927.10.11260	Tb927.10.11260		hypothetical protein, conserved	22.384	20.9	0	8.8086	1	1	1.01339	0.00577816	0.467066	0.330622		20.9	3	3	1.25778	1.15193	0.0614253	106.19	3	4.3	1	1	0.70276	0.89152	-0.0498689	NaN	1	0	0	0	NaN	NaN		NaN	0
	2036	Tb927.8.2300	Tb927.8.2300		hypothetical protein, conserved	25.468	26.7	0	10.585	1	1	1.00186	0.000805922	0.468657	0.329145		26.7	4	4	1.13496	1.03126	0.0133669	9.1196	4	14	2	2	0.75133	0.96202	-0.0168159	0.59135	2	14	2	2	0.70548	1.0136	0.0058666	9.2372	3
	2075	Tb927.8.3530	Tb927.8.3530		glycerol-3-phosphate dehydrogenase [NAD ], glycosomal	37.805	32.2	0	88.927	1		1.00194	0.000839792	0.468868	0.32895		32.2	9	9	1.05769	0.959141	-0.0181177	45.224	14	30.8	8	8	0.82106	1.0276	0.0118241	40.253	12	30.8	8	8	0.70558	1.0205	0.00881301	39.037	11
	141	Tb927.5.450;Tb11.v5.0222	Tb927.5.450;Tb11.v5.0222	NUBM	NADH-ubiquinone oxidoreductase, mitochondrial, putative (NUBM);NADH-ubiquinone oxidoreductase, mitochondrial, putative	55.32	25.4	0	89.934	2		1.0012	0.000519188	0.470733	0.327226		21.8	8	8	1.13961	1.02587	0.0110932	21.641	10	23.4	8	8	0.77539	0.97594	-0.0105769	17.783	10	18.3	5	5	0.70159	1.0024	0.00104106	6.2278	6
	1304	Tb927.3.2180	Tb927.3.2180		hypothetical protein, conserved	17.908	10.3	0	14.172	1	1	1.01389	0.00599201	0.472574	0.32553		10.3	1	1	1.50457	1.33567	0.125698	10.214	2	10.3	1	1	0.56552	0.72758	-0.138119	16.34	2	10.3	1	1	0.72133	1.0725	0.0303973	19.303	2
	988	Tb927.11.3580	Tb927.11.3580		hypothetical protein, conserved	48.299	6	0.0023485	3.1603	1		1.01343	0.00579474	0.474298	0.323949		0	0	0	NaN	NaN		NaN	0	6	1	1	0.95629	1.1951	0.0774042	NaN	1	6	1	1	0.59007	0.85938	-0.0658148	NaN	1
	2312	Tb927.9.2270	Tb927.9.2270		hypothetical protein, conserved	78.354	44	0	323.31	1	1	1.00183	0.0007953	0.475072	0.323241		39.9	21	21	1.10034	1.00869	0.00375556	7.7558	28	39.4	20	20	0.83198	1.0439	0.0186589	13.636	28	37.3	19	19	0.65807	0.95493	-0.0200285	14.518	28
	296	Tb927.10.10130	Tb927.10.10130	MRB10130	mitochondrial RNA binding complex 1 subunit (MRB10130)	61.046	11	0	38.731	1	1	1.00246	0.00106663	0.475444	0.3229		11	4	4	1.17505	1.07559	0.031648	21.253	5	7.3	3	3	0.77668	0.97248	-0.0121193	8.2785	4	7.3	3	3	0.6697	0.9631	-0.0163286	5.0021	4
	842	Tb927.11.1450	Tb927.11.1450		2-oxoglutarate dehydrogenase E1 component, putative	113.38	57	0	323.31	1	1	1.00063	0.000274735	0.476405	0.322024		55.4	54	54	1.11172	1.01585	0.0068283	14.741	74	52.8	51	51	0.7976	1.003	0.00130093	10.475	73	53.3	49	49	0.67904	0.98332	-0.00730513	16.651	68
	2054	Tb927.8.2880	Tb927.8.2880		hypothetical protein, conserved	125.11	37.2	0	323.31	1	1	1.00072	0.000313987	0.476756	0.321704		33.2	28	28	1.11116	1.02291	0.0098387	14.717	41	36.3	31	31	0.78858	0.9887	-0.00493547	57.15	37	29	23	23	0.6835	0.99092	-0.00396141	21.551	27
	2058	Tb927.8.3040	Tb927.8.3040		hypothetical protein, conserved	22.299	23.8	0	12.702	1	1	1.00357	0.00154555	0.477514	0.321014		11.9	1	1	1.23241	1.12198	0.0499859	NaN	1	23.8	3	3	0.75479	0.94289	-0.025539	32.994	3	23.8	3	3	0.65484	0.95541	-0.0198102	16.145	3
	300	Tb927.10.10300	Tb927.10.10300		hypothetical protein, conserved	65.624	8.9	0	25.55	1		1.00591	0.00255717	0.478518	0.320102		5.7	2	2	1.28644	1.16168	0.0650876	19.198	3	8.9	3	3	0.83947	1.0471	0.0199882	24.663	4	8.9	3	3	0.57146	0.83675	-0.0774043	20.109	3
	1429	Tb927.4.1540	Tb927.4.1540		hypothetical protein, conserved	55.24	28.3	0	144.61	1		1.00055	0.000237673	0.478568	0.320056		26.6	8	8	1.13347	1.01853	0.00797255	56.232	12	24.4	9	9	0.78996	0.99414	-0.00255245	19.793	11	19.7	7	7	0.6893	0.98922	-0.00470711	36.633	9
	443	Tb927.10.15220	Tb927.10.15220		hypothetical protein, conserved	22.101	8.8	0	6.3082	1	1	1.01614	0.0069519	0.479562	0.319155		8.8	1	1	1.38985	1.30339	0.115074	NaN	1	8.8	1	1	0.62333	0.79219	-0.101171	NaN	1	0	0	0	NaN	NaN		NaN	0
	1073	Tb927.3.4360;Tb927.11.6140	Tb927.3.4360;Tb927.11.6140		40S ribosomal protein S15A, putative;40S ribosomal protein S15A, putative	10.205	15.6	0	5.9093	2		1.00131	0.00056904	0.480117	0.318653		15.6	1	1	1.10593	1.02519	0.0108039	NaN	1	15.6	1	1	0.8195	1.0246	0.0105544	NaN	1	15.6	1	1	0.65507	0.95576	-0.0196511	NaN	1
	218	Tb927.8.4130;Tb927.8.4080;Tb927.8.4030;Tb11.v5.0861	Tb927.8.4130;Tb927.8.4080;Tb927.8.4030;Tb11.v5.0861	CITFA-5a;CITFA-5b	class I transcription factor A, subunit 5b (CITFA-5b);hypothetical protein, conserved;class I transcription factor A, subunit 5a (CITFA-5a);hypothetical protein, conserved	23.529	6.6	0.0051926	2.2367	4		1.00236	0.00102232	0.482628	0.316387		6.6	1	1	1.00509	0.920048	-0.0361896	NaN	1	6.6	1	1	0.79535	1.0082	0.00354669	NaN	1	6.6	1	1	0.75514	1.0857	0.0357098	NaN	1
	1740	Tb927.6.4080	Tb927.6.4080		hypothetical protein, conserved	24.735	16.6	0	17.332	1	1	1.00233	0.00101115	0.483004	0.316049		16.6	3	3	1.00615	0.911245	-0.0403649	24.069	3	16.6	3	3	0.85172	1.067	0.0281644	42.754	3	16.6	3	3	0.72184	1.0357	0.015234	39.759	3
	1660	Tb927.6.1410	Tb927.6.1410		hypothetical protein, conserved	27.154	33.6	0	20.193	1	1	1.00118	0.000510121	0.483196	0.315876		26.2	6	6	1.11044	1.01821	0.00783565	19.627	7	20.1	4	4	0.75904	0.95364	-0.0206155	96.95	4	17	3	3	0.72208	1.0335	0.0143105	17.832	3
	2166	Tb927.8.7120	Tb927.8.7120		squalene synthase, putative	51.478	27.6	0	82.842	1		1.00128	0.000553966	0.483745	0.315383		25.4	11	11	1.06177	0.964506	-0.015695	13.356	14	20.6	8	8	0.77989	0.98465	-0.00671811	8.4384	8	19.7	8	8	0.72795	1.057	0.024075	9.5439	8
	1394	Tb927.3.5550	Tb927.3.5550	TbRX1	small GTP-binding protein, putative (TbRX1)	20.638	7.1	0.003132	2.545	1		1.00057	0.000248712	0.483814	0.315322		7.1	1	1	1.07387	0.976086	-0.010512	NaN	1	7.1	1	1	0.82584	1.0101	0.00436437	NaN	1	7.1	1	1	0.70121	1.016	0.00689371	NaN	1
	1854	Tb927.7.290	Tb927.7.290		leucine-rich repeat protein (LRRP), putative,leucine-rich repeat protein 1 (LRRP1), putative	58.754	11.9	0	54.795	1		1.0024	0.00104056	0.48392	0.315226		7.3	3	3	1.00166	0.91191	-0.0400483	13.933	3	9.9	3	3	0.87102	1.0939	0.0389776	52.302	3	11.9	4	4	0.69311	1.0097	0.00419236	4.2918	3
	1776	Tb927.9.15190;Tb927.6.5040	Tb927.9.15190;Tb927.6.5040		ribosomal protein L15, putative;ribosomal protein L15, putative	24.401	4.9	0.0023496	3.1748	2		1.00321	0.00139161	0.484475	0.314728		4.9	1	1	0.95429	0.869641	-0.06066	NaN	1	4.9	1	1	0.82806	1.0504	0.0213547	NaN	1	4.9	1	1	0.75839	1.1053	0.0434802	NaN	1
	246	Tb927.1.1840	Tb927.1.1840		hypothetical protein, conserved	59.174	4.4	0	10.546	1		1.00467	0.00202274	0.484524	0.314685		4.4	1	1	0.970591	0.907771	-0.0420239	NaN	1	4.4	1	1	0.71035	0.89893	-0.0462741	NaN	1	4.4	1	1	0.84848	1.2427	0.0943663	NaN	1
	298	Tb927.10.10170	Tb927.10.10170		predicted WD40 repeat protein	48.744	9.9	0	10.264	1		1.00448	0.00194311	0.48458	0.314634		0	0	0	NaN	NaN		NaN	0	9.9	3	3	0.73172	0.91593	-0.0381377	26.448	3	4.3	1	1	0.77074	1.1016	0.0420239	NaN	1
	1455	Tb927.4.2440	Tb927.4.2440		hypothetical protein, conserved	44.263	9.4	0	13.3	1	1	1.00309	0.0013411	0.48475	0.314482		7	1	1	1.15945	1.02187	0.0093948	NaN	1	9.4	2	2	0.68524	0.8789	-0.0560605	14.829	2	7	1	1	0.77565	1.1238	0.050689	NaN	1
	1563	Tb927.5.1780	Tb927.5.1780		hypothetical protein, conserved	48.192	44.5	0	193.39	1		1.00078	0.000338768	0.48577	0.313569		42.4	14	14	1.0816	0.984155	-0.00693645	27.53	16	36.2	12	12	0.82727	1.0402	0.0171168	44.907	15	29.3	10	10	0.6802	0.97912	-0.00916408	8.5582	10
	635	Tb927.10.7550	Tb927.10.7550		hypothetical protein, conserved	62.61	7.4	0	17.944	1		1.00579	0.00250674	0.487297	0.312206		2.3	1	1	1.48093	1.37221	0.137422	NaN	1	7.4	3	3	0.748	0.92418	-0.0342434	26.839	3	2.3	1	1	0.55654	0.80231	-0.0956578	NaN	1
	1965	Tb927.7.6760	Tb927.7.6760		hypothetical protein, conserved	132.3	10.4	0	36.247	1		1.00177	0.000765974	0.489185	0.310527		5.7	5	5	0.971629	0.892698	-0.0492956	13.996	5	4.8	5	5	0.84586	1.0628	0.0264515	50.711	5	6.3	5	5	0.73183	1.0596	0.0251419	23.58	5
	311	Tb927.10.10740	Tb927.10.10740		hypothetical protein, conserved	70.02	14.8	0	54.509	1		1.00198	0.000858442	0.489834	0.309951		13.2	5	5	0.970026	0.883548	-0.0537697	17.608	6	9.5	4	4	0.89158	1.1195	0.0490241	33.926	4	13.2	5	5	0.69834	1.017	0.00732095	58.097	6
	2126	Tb927.8.6000	Tb927.8.6000		fatty acid desaturase, putative	49.385	9.7	0	6.2997	1		1.0306	0.0130905	0.490269	0.309566		4.6	2	2	0.126457	0.115367	-0.937919	NaN	1	4.4	2	2	2.4297	3.0576	0.485381	19.431	2	5.1	2	2	2.1303	3.1032	0.49181	NaN	1
	515	Tb927.10.3200	Tb927.10.3200	U2AF35	U2 splicing auxiliary factor, putative (U2AF35)	29.114	15.4	0	8.4083	1		1.00164	0.000710892	0.490959	0.308955		15.4	2	2	0.984155	0.898796	-0.046339	21.294	2	15.4	2	2	0.89641	1.1217	0.0498767	2.8866	2	15.4	2	2	0.69682	0.99677	-0.00140504	9.4288	2
	1990	Tb927.7.840	Tb927.7.840		hypothetical protein, conserved	14.51	27.4	0	12.501	1	1	1.00187	0.000813361	0.491102	0.308828		18.5	2	2	1.12637	1.03699	0.0157741	16.016	2	18.5	2	2	0.89018	1.1163	0.0477809	NaN	1	18.5	2	2	0.60202	0.86873	-0.0611152	22.718	2
	2145	Tb927.8.6490	Tb927.8.6490		protein kinase, putative	119.35	27.1	0	91.414	1		1.00044	0.000191625	0.492032	0.308007		18.5	17	17	1.12924	1.03666	0.0156347	30.865	17	22.3	21	21	0.79429	0.99685	-0.00137019	11.187	23	21.7	19	19	0.67047	0.96897	-0.0136897	22.544	20
	2244	Tb927.9.12500	Tb927.9.12500		hypothetical protein, conserved	58.24	32.1	0	111.06	1		1.00032	0.000139812	0.492583	0.30752		30.5	12	12	1.12153	1.03019	0.0129194	15.62	13	28.1	11	11	0.78025	0.9783	-0.00952795	13.508	14	28.6	11	11	0.68889	0.99318	-0.00297203	24.222	15
	1632	Tb927.5.4080	Tb927.5.4080		hypothetical protein, conserved	58.167	7.7	0	7.9247	1	1	1.00135	0.000587779	0.492629	0.30748		2.4	1	1	1.07698	0.98068	-0.00847246	NaN	1	7.7	3	3	0.90787	1.1306	0.053309	7.8629	3	5.3	2	2	0.63233	0.90558	-0.0430732	NaN	1
	1596	Tb927.5.3090	Tb927.5.3090		hypothetical protein, conserved	11.655	43.6	0	48.259	1	1	1.0013	0.000565396	0.492657	0.307456		43.6	3	3	1.21255	1.1159	0.0476241	11.931	5	43.6	3	3	0.80254	1.0017	0.000737674	15.324	4	33.7	2	2	0.62588	0.89812	-0.0466656	13.586	3
	531	Tb927.10.3730	Tb927.10.3730		hypothetical protein, conserved	75.395	4.9	0.00048948	3.8322	1	1	1.00241	0.00104464	0.493375	0.306823		4.9	2	2	0.975705	0.893017	-0.0491405	11.626	2	3	1	1	0.8929	1.1252	0.0512297	NaN	1	0	0	0	NaN	NaN		NaN	0
	1254	Tb927.2.5860;Tb927.2.5870	Tb927.2.5860;Tb927.2.5870		hypothetical protein, conserved;hypothetical protein, conserved	133.74	4.9	0	6.2494	2		1.00134	0.00058247	0.493496	0.306716		4.9	2	2	1.21296	1.1231	0.0504196	2.0845	2	4.9	2	2	0.82433	1.0221	0.00949339	7.5117	2	4.9	2	2	0.60468	0.87465	-0.0581657	18.343	2
	2353	Tb927.9.4680	Tb927.9.4680		ATP-dependent DEAD box helicase, putative	45.361	21	0	21.782	1		1.00151	0.000653554	0.493582	0.306641		11.1	4	4	1.26457	1.153	0.0618308	7.2575	6	17.1	6	6	0.69174	0.86534	-0.0628132	19.502	7	9.9	3	3	0.69007	1.0068	0.00294321	21.889	4
	1244	Tb927.2.4930	Tb927.2.4930		esterase, putative	27.191	5.7	0.0023288	3.0453	1		1.00245	0.00106429	0.493787	0.30646		2.9	1	1	1.40843	1.31785	0.119867	NaN	1	5.7	2	2	0.72796	0.91636	-0.0379339	10.715	2	2.9	1	1	0.57922	0.83418	-0.0787402	NaN	1
	2053	Tb927.8.2850	Tb927.8.2850		Poly(A)-specific ribonuclease PARN-1	65.146	27.5	0	91.833	1	1	1.00063	0.000273208	0.493985	0.306286		25.1	10	10	1.05036	0.959693	-0.0178678	15.219	10	16.9	7	7	0.85384	1.0772	0.0322963	6.8896	7	13	5	5	0.67323	0.96915	-0.013609	25.641	5
	1471	Tb927.4.3160	Tb927.4.3160	DAT	dihydroxyacetone phosphate acyltransferase, putative (DAT)	137.14	32.2	0	169.59	1		1.00019	8.43654e-05	0.496391	0.304176		22.6	19	19	1.08482	0.985416	-0.00638043	13.581	21	27.1	21	21	0.81967	1.0387	0.0164901	25.548	22	16	13	13	0.68127	0.97756	-0.00985658	44.509	13
	1994	Tb927.7.890	Tb927.7.890		electron transfer protein, putative	19.713	4.5	0.0027473	2.7894	1	1	1.00079	0.000341684	0.497381	0.30331		4.5	1	1	1.19682	1.10122	0.0418761	NaN	1	4.5	1	1	0.72359	0.90951	-0.0411925	NaN	1	0	0	0	NaN	NaN		NaN	0
	1897	Tb927.7.4070;Tb927.7.4060	Tb927.7.4070;Tb927.7.4060		calpain-like cysteine peptidase, putative,cysteine peptidase, Clan CA, family C2, putative;calpain-like cysteine peptidase, putative,cysteine peptidase, Clan CA, family C2, putative	13.518	25.8	0	52.383	2		1.0006	0.000260493	0.498571	0.302273		25.8	2	2	1.45142	1.3298	0.123788	21.413	2	25.8	2	2	0.64309	0.80638	-0.0934603	28.168	2	25.8	2	2	0.64438	0.93423	-0.0295462	24.956	2
	524	Tb927.10.3510;Tb11.v5.0886	Tb927.10.3510		hypothetical protein, conserved	197.82	4.6	0	10.814	2	1	0.999899	-4.40429e-05	0.500301	0.300769		4.6	6	6	0.90629	0.834794	-0.0784206	18.427	6	1.7	3	3	1.0021	1.2526	0.0978124	38.794	2	0.6	1	1	0.65509	0.95604	-0.0195239	NaN	1
	2229	Tb927.9.11410;Tb927.9.11380	Tb927.9.11410;Tb927.9.11380		unspecified product;unspecified product	14.962	32.4	0	17.087	2		0.999562	-0.000190441	0.501986	0.299308		20.1	2	2	1.25571	1.14711	0.0596032	20.743	3	32.4	4	4	0.78763	0.99451	-0.00239085	16.841	3	25.9	3	3	0.60774	0.87542	-0.0577835	5.7507	3
	389	Tb927.10.13430	Tb927.10.13430		citrate synthase, putative	53.584	10.3	0	10.938	1	1	0.999111	-0.000386067	0.502289	0.299046		9.3	4	4	0.851209	0.775855	-0.110219	32.538	2	5.2	2	2	0.82196	1.0335	0.0143105	12.195	2	3.9	2	2	0.84976	1.2438	0.0947506	31.081	2
	569	Tb927.10.5110	Tb927.10.5110	KREPA4	KREPA4 (KREPA4)	23.697	5.5	0	4.5454	1	1	0.998463	-0.000668228	0.503195	0.298264		5.5	1	1	1.25529	1.16386	0.0659007	NaN	1	0	0	0	NaN	NaN		NaN	0	5.5	1	1	0.58785	0.85657	-0.0672371	NaN	1
	1422	Tb927.4.1300	Tb927.4.1300		amidinotransferase, putative	42.015	21.9	0	25.343	1		0.999414	-0.000254653	0.503923	0.297635		21.9	5	5	1.14604	1.04282	0.0182085	14.908	4	14.2	4	4	0.84731	1.0639	0.0269008	11.294	4	9.4	3	3	0.62017	0.89976	-0.0458733	6.3875	3
	1940	Tb927.7.5680	Tb927.7.5680		deoxyribose-phosphate aldolase, putative	30.037	57.9	0	87.655	1		0.999868	-5.72832e-05	0.504374	0.297247		57.5	15	15	1.07802	0.979144	-0.0091533	5.1137	22	52.1	14	14	0.80073	1.0069	0.00298634	18.749	20	51.4	13	13	0.70243	1.0139	0.00599512	7.2025	17
	1741	Tb927.6.4090	Tb927.6.4090	HSP60	chaperonin HSP60, mitochondrial precursor, putative (HSP60)	58.37	38.8	0	164.02	1	1	0.999765	-0.00010191	0.505307	0.296445		34.6	15	15	1.07974	0.99681	-0.00138757	19.398	17	32	13	13	0.7631	0.97462	-0.0111647	7.5937	17	28.1	10	10	0.7135	1.0286	0.0122465	9.3747	13
	1809	Tb927.7.1380	Tb927.7.1380		hypothetical protein, conserved	16.523	7.3	0.0083857	1.9874	1		0.999188	-0.000352973	0.50577	0.296047		7.3	1	1	1.03761	0.955384	-0.0198222	NaN	1	7.3	1	1	0.82854	1.045	0.0191163	NaN	1	0	0	0	NaN	NaN		NaN	0
	624	Tb927.10.7290	Tb927.10.7290		hypothetical protein, conserved	129.88	7	0	46.979	1		0.998061	-0.000842707	0.505785	0.296034		5.5	4	4	1.39876	1.26465	0.101972	39.102	5	4.2	3	3	0.72158	0.8974	-0.0470139	6.8527	4	7	5	5	0.60672	0.87602	-0.057486	4.8221	7
	627	Tb927.10.7410	Tb927.10.7410		succinyl-CoA ligase [GDP-forming] beta-chain, putative	44.905	50.4	0	320.58	1	1	0.999618	-0.000165912	0.508242	0.29393		48.7	17	17	1.05842	0.973331	-0.0117396	15.134	26	44.9	15	15	0.79756	0.99643	-0.00155321	12.373	25	41.3	15	15	0.70547	1.0299	0.0127951	9.2727	23
	1192	Tb927.2.1860	Tb927.2.1860	MRB1860	mitochondrial RNA binding complex 1 subunit (MRB1860)	96.551	12.5	0	17.819	1	1	0.99774	-0.00098276	0.509105	0.293193		10.6	6	6	1.2801	1.1879	0.0747806	36.889	7	9.5	6	6	0.71697	0.8979	-0.046772	30.927	6	4.5	3	3	0.64656	0.9312	-0.030957	72.484	3
	191	Tb927.7.5620;Tb11.v5.0590	Tb927.7.5620;Tb11.v5.0590		hypothetical protein, conserved;hypothetical protein, conserved	48.224	11	0	45.184	2	1	0.999459	-0.000235138	0.510076	0.292365		11	4	4	1.10525	1.00252	0.00109131	4.5728	4	8.6	4	4	0.76865	0.96574	-0.0151398	3.1135	5	7	2	2	0.70157	1.0312	0.0133429	8.6441	3
	211	Tb927.6.1260;Tb11.v5.0742	Tb927.6.1260;Tb11.v5.0742	TbPSB1	proteasome beta-1 subunit, putative (TbPSB1);proteasome beta-1 subunit, putative	30.441	5.7	0	9.5331	2		0.994387	-0.00244475	0.510364	0.29212		5.7	1	1	1.54235	1.43511	0.156885	NaN	1	5.7	1	1	0.60042	0.75033	-0.124748	NaN	1	5.7	1	1	0.64379	0.91312	-0.0394721	NaN	1
	798	Tb927.11.13050;Tb927.11.13040;Tb927.11.13030;Tb927.11.13020	Tb927.11.13050;Tb927.11.13040;Tb927.11.13030;Tb927.11.13020		calmodulin;calmodulin;calmodulin;calmodulin	16.838	20.1	0	15.98	4		0.997417	-0.00112343	0.510711	0.291825		8.7	1	1	1.24853	1.13938	0.0566686	NaN	1	20.1	2	2	0.84132	1.0238	0.0102151	23.817	2	20.1	2	2	0.58997	0.85064	-0.0702542	1.4514	2
	1308	Tb927.3.2300	Tb927.3.2300		hypothetical protein, conserved	22.084	8	0	4.8	1	1	0.995335	-0.00203092	0.510989	0.291588		8	1	1	0.861401	0.78827	-0.103325	NaN	1	8	1	1	0.7649	0.94875	-0.0228482	NaN	1	8	1	1	0.91577	1.3185	0.12008	NaN	1
	230	Tb927.11.3600;Tb927.11.3590;Tb11.v5.1059	Tb927.11.3600;Tb927.11.3590;Tb11.v5.1059		40S ribosomal protein S4, putative;40S ribosomal protein S4, putative;40S ribosomal protein S4, putative	30.644	7.7	0	4.5009	3		0.995782	-0.0018356	0.51124	0.291375		7.7	2	2	1.22486	1.12235	0.0501272	13.304	2	4	1	1	0.69844	0.88349	-0.0537984	NaN	1	0	0	0	NaN	NaN		NaN	0
	631	Tb927.10.7490	Tb927.10.7490		cullin, putative	79.034	4.8	0	8.1589	1		0.998412	-0.000690024	0.511484	0.291168		2.7	1	1	1.06163	0.92584	-0.033464	NaN	1	2.7	1	1	0.75625	0.98242	-0.0077028	NaN	1	4.8	2	2	0.75201	1.0942	0.0390967	5.5604	2
	457	Tb927.10.15790	Tb927.10.15790		hypothetical protein, conserved	16.775	12.4	0.0047972	2.3021	1	1	0.993906	-0.00265458	0.511888	0.290825		12.4	1	1	1.34002	1.17055	0.0683896	NaN	1	12.4	1	1	0.66666	0.84392	-0.0736987	NaN	1	0	0	0	NaN	NaN		NaN	0
	1249	Tb927.2.5230	Tb927.2.5230		protein kinase, putative	30.737	14.3	0	5.8532	1		0.993545	-0.00281227	0.512259	0.290511		10	2	2	0.84488	0.768699	-0.114244	NaN	1	10	2	2	0.70417	0.89303	-0.049134	NaN	1	14.3	3	3	0.9811	1.4287	0.154941	39.145	2
	1852	Tb927.7.2780	Tb927.7.2780		hypothetical protein, conserved	12.723	10.3	0	11.631	1		0.972758	-0.0119954	0.513504	0.289456		10.3	1	1	0.556948	0.507485	-0.294576	NaN	1	10.3	1	1	1.5	1.8646	0.270586	NaN	1	0	0	0	NaN	NaN		NaN	0
	2181	Tb927.8.7950	Tb927.8.7950		hypothetical protein, conserved	191.21	6.8	0	34.913	1		0.998955	-0.00045386	0.514323	0.288764		5.6	7	7	1.17021	1.04934	0.0209162	24.231	6	2.5	3	3	0.7775	0.9878	-0.00533098	14.636	3	4.8	5	5	0.65715	0.96173	-0.0169468	18.065	5
	1618	Tb927.5.3700	Tb927.5.3700		hypothetical protein, conserved	32.239	11.6	0	6.1106	1	1	0.995057	-0.00215198	0.514882	0.288293		3.4	1	1	1.10309	1.00459	0.00198928	NaN	1	8.2	1	1	0.6411	0.80786	-0.0926639	NaN	1	3.4	1	1	0.83925	1.214	0.0842187	NaN	1
	2208	Tb927.9.10500	Tb927.9.10500		hypothetical protein, conserved	59.455	20.2	0	29.462	1	1	0.997202	-0.00121678	0.515917	0.28742		10.2	4	4	0.950751	0.881368	-0.0548428	10.076	4	11	4	4	0.86194	1.0747	0.0312872	9.4007	5	13.4	5	5	0.71675	1.0469	0.0199052	20.383	6
	176	Tb11.v5.0485;Tb927.10.9280	Tb11.v5.0485;Tb927.10.9280		hypothetical protein, conserved;hypothetical protein, conserved	101.8	10.1	0	22.472	2		0.9967	-0.00143558	0.516596	0.286849		10.1	7	7	1.12035	1.01011	0.0043691	11.188	7	5.1	3	3	0.88304	1.1178	0.0483641	19.237	3	2	2	2	0.61115	0.87692	-0.05704	9.9833	2
	1597	Tb927.5.3110	Tb927.5.3110		hypothetical protein, conserved	24.469	33	0	44.541	1	1	0.999434	-0.000245862	0.516631	0.286819		29.8	4	4	1.07505	0.977135	-0.0100454	3.5145	5	33	5	5	0.79249	1.0035	0.00151738	20.67	7	23.9	3	3	0.70445	1.0181	0.00779044	8.0117	3
	2043	Tb927.8.2650	Tb927.8.2650		metallo-beta-lactamase-like protein, putative	40.315	7.6	0	4.1684	1	1	0.995015	-0.00217052	0.516852	0.286634		7.6	2	2	1.28259	1.17145	0.0687252	13.773	2	2.8	1	1	0.65389	0.81835	-0.0870609	NaN	1	2.8	1	1	0.71451	1.0276	0.0118241	NaN	1
	1707	Tb927.6.2790;REV__Tb927.6.2790	Tb927.6.2790		L-threonine 3-dehydrogenase, putative	36.957	53.6	0	230.01	2	1	0.999196	-0.000349179	0.517383	0.286188		44.6	11	11	1.05231	0.967586	-0.0143105	8.1517	17	53.6	12	12	0.82098	1.0206	0.00885556	24.724	16	53.6	12	12	0.70203	1.0102	0.00440736	11.977	15
	1094	Tb927.11.6770	Tb927.11.6770		hypothetical protein, conserved	74.944	14.6	0	17.01	1	1	0.997175	-0.00122852	0.518433	0.285307		12.7	7	7	1.10635	1.00083	0.000360749	13.498	5	7.7	4	4	0.72299	0.90618	-0.0427855	15.858	4	5.9	3	3	0.74937	1.0933	0.0387393	20.395	3
	1344	Tb927.3.3580	Tb927.3.3580	LPG3	lipophosphoglycan biosynthetic protein, putative (LPG3)	87.766	27.4	0	204.6	1		0.997892	-0.000916282	0.518838	0.284968		24.2	16	16	1.17941	1.06651	0.0279637	10.246	15	23.5	16	16	0.73435	0.93005	-0.0314937	9.294	14	23.7	16	16	0.68986	1.0018	0.000781027	27.296	16
	1028	Tb927.11.4910	Tb927.11.4910		predicted ankyrin repeat family protein	43.647	5.9	0	4.4392	1		0.990645	-0.00408182	0.518996	0.284836		2.8	1	1	0.945716	0.846453	-0.0723969	NaN	1	5.9	2	2	0.92279	1.1594	0.0642333	18.299	2	0	0	0	NaN	NaN		NaN	0
	1590	Tb927.5.2950	Tb927.5.2950		hypothetical protein, conserved	88.256	29.9	0	58.096	1		0.995799	-0.00182833	0.519046	0.284794		16.4	11	11	0.93932	0.860215	-0.065393	23.661	10	17.2	13	13	0.81565	1.022	0.0094509	11.808	13	18.9	11	11	0.77037	1.1232	0.0504571	10.612	11
	837	Tb927.11.14190	Tb927.11.14190		hypothetical protein, conserved	100.47	9.3	0	30.704	1		0.990536	-0.00412994	0.519816	0.284151		6.5	3	3	1.1303	1.05958	0.0251338	54.2	3	7.9	4	4	1.0171	1.2771	0.106225	23.641	4	6.6	3	3	0.49076	0.71821	-0.143749	56.874	3
	1007	Tb927.11.4160	Tb927.11.4160		predicted C2 domain protein	136.31	20.4	0	101.4	1		0.998082	-0.000833831	0.520252	0.283787		17.7	16	16	1.10774	1.01459	0.00629058	26.499	16	14.8	15	15	0.74453	0.93579	-0.0288216	37.665	16	14.3	11	11	0.71774	1.0472	0.0200296	15.706	12
	2308	Tb927.9.1710	Tb927.9.1710		hypothetical protein, conserved	52.951	25.4	0	42.031	1		0.997239	-0.00120077	0.520263	0.283777		23.7	9	9	1.10735	1.01124	0.00485209	22.385	10	20.6	8	8	0.85204	1.0756	0.0316508	18.926	10	14	4	4	0.62376	0.91179	-0.0401052	21.518	5
	475	Tb927.10.2050	Tb927.10.2050		hypothetical protein, conserved	44.299	9.7	0	6.1196	1	1	0.990037	-0.00434841	0.520557	0.283532		5.3	1	1	1.02117	0.928247	-0.0323366	NaN	1	9.7	2	2	0.60594	0.76297	-0.117493	31.741	2	5.3	1	1	0.93053	1.3702	0.136784	NaN	1
	480	Tb927.10.2240	Tb927.10.2240		hypothetical protein, conserved	66.352	15.1	0	29.481	1		0.986981	-0.00569126	0.521011	0.283153		12.6	4	4	1.67272	1.49887	0.175763	23.929	4	6.1	2	2	0.72283	0.9041	-0.0437835	NaN	1	6.8	2	2	0.4842	0.70949	-0.149054	38.162	2
	1330	Tb927.3.3180;Tb11.v5.0584	Tb927.3.3180	TbNup98	Nucleoporin (TbNup98)	98.143	4.6	0	4.7031	2		0.995534	-0.00194391	0.521418	0.282814		3.5	2	2	0.976658	0.882924	-0.0540765	31.786	2	3.1	2	2	0.8945	1.1388	0.0564475	42.512	2	2	1	1	0.67772	0.98129	-0.00820263	NaN	1
	601	Tb927.10.6360	Tb927.10.6360		hypothetical protein, conserved	55.524	30.4	0	88.609	1		0.997838	-0.000939764	0.5228	0.281664		26.1	8	8	1.04517	0.957854	-0.0187005	4.6894	10	26.7	8	8	0.78032	0.97266	-0.0120389	16.489	10	25.3	7	7	0.74196	1.0664	0.0279201	21.626	7
	1153	Tb927.11.9350	Tb927.11.9350		phosphonopyruvate decarboxylase-like protein, putative	42.313	26.4	0	33.232	1		0.999204	-0.00034569	0.523254	0.281287		20.4	7	7	1.10558	0.998901	-0.000477465	5.0367	7	15.9	6	6	0.81533	1.0205	0.00881301	9.241	6	18.4	6	6	0.66967	0.97865	-0.0093726	31.377	6
	1723	Tb927.6.3640	Tb927.6.3640		hypothetical protein, conserved	62.901	13.2	0	10.639	1		0.994104	-0.00256833	0.523512	0.281074		4.8	2	2	0.942685	0.843313	-0.0740114	3.5824	2	13.2	5	5	0.81739	1.0184	0.00791839	7.1729	6	10.2	4	4	0.79196	1.1439	0.0583881	4.92	4
	1379	Tb927.3.4950	Tb927.3.4950		hypothetical protein, conserved	52.553	16.9	0	15.854	1	1	0.992477	-0.00327947	0.523556	0.281037		10.3	3	3	1.16474	1.0489	0.0207341	15.429	2	8.6	2	2	0.62671	0.79824	-0.0978665	32.232	2	8.4	2	2	0.7931	1.1676	0.0672941	13.845	2
	1182	Tb927.11.9880	Tb927.11.9880		hypothetical protein, conserved	51.909	7.3	0	10.667	1		0.995808	-0.00182448	0.524062	0.280617		7.3	3	3	1.21471	1.12589	0.051494	23.583	3	4.9	2	2	0.74158	0.9272	-0.0328266	16.442	2	4.9	2	2	0.65458	0.94593	-0.024141	5.0993	2
	931	Tb927.11.1930	Tb927.11.1930		ubiquitin carboxyl-terminal hydrolase, putative,cysteine peptidase, Clan CA, family C19, putative	63.022	9.7	0	8.3965	1		0.988954	-0.00482383	0.524166	0.280531		9.7	4	4	0.880747	0.775074	-0.110657	29.767	4	9.7	4	4	0.71304	0.92775	-0.032569	2.2526	4	2.5	1	1	0.92451	1.3451	0.128755	NaN	1
	2086	Tb927.8.4250	Tb927.8.4250		hypothetical protein, conserved	47.403	14.4	0	27.798	1	1	0.998378	-0.000705044	0.524596	0.280175		14.4	5	5	1.05659	0.96637	-0.0148564	125.07	5	10.2	3	3	0.83725	1.0445	0.0189084	14.03	3	10.5	3	3	0.67655	0.9859	-0.00616713	28.99	3
	1167	Tb927.11.9640	Tb927.11.9640	GlyRS	glycyl-tRNA synthetase, putative	70.175	6.6	0	4.9677	1		0.988203	-0.00515375	0.526517	0.278588		1.8	1	1	1.27265	1.13912	0.0565699	NaN	1	2.6	1	1	NaN	NaN		NaN	0	4	2	2	0.5626	0.85728	-0.0668773	5.1109	3
	1820	Tb927.7.1680	Tb927.7.1680		hypothetical protein, conserved	36.328	24.6	0	32.317	1		0.997055	-0.00128089	0.52652	0.278585		24.6	8	8	1.04115	0.947149	-0.0235816	5.7406	10	24.6	8	8	0.85842	1.077	0.0322157	5.0546	9	22.4	7	7	0.66567	0.97168	-0.0124767	4.1831	6
	127	Tb927.7.4730;Tb11.v5.0156	Tb927.7.4730;Tb11.v5.0156		pumilio/PUF RNA binding protein 5;hypothetical protein, conserved	46.646	4.9	0	12.703	2		0.989449	-0.00460652	0.526549	0.278561		4.9	1	1	1.39061	1.30562	0.115816	NaN	1	4.9	1	1	0.73244	0.90096	-0.0452945	NaN	1	4.9	1	1	0.56496	0.82349	-0.0843417	NaN	1
	713	Tb927.11.10150	Tb927.11.10150		hypothetical protein, conserved	137.64	6.9	0	32.295	1	1	0.992403	-0.00331188	0.526556	0.278555		6.9	6	6	1.095	1.00136	0.000591107	26.58	6	4.2	4	4	0.9415	1.1774	0.070924	49.782	5	3.4	3	3	0.56847	0.82899	-0.0814507	7.3619	3
	2233	Tb927.9.11850	Tb927.9.11850	SMC1	structural maintenance of chromosome 1, putative (SMC1)	144.54	4.6	0	14.276	1		0.984123	-0.00695069	0.526584	0.278532		2.4	3	3	0.932836	0.862292	-0.0643457	30.532	3	3	3	3	0.60456	0.74094	-0.130217	13.653	3	2.6	3	3	1.0285	1.4918	0.173711	32.298	2
	268	Tb927.1.3910	Tb927.1.3910		hypothetical protein, conserved	99.782	8.4	0	21.123	1		0.992055	-0.0034643	0.528135	0.277255		7.3	4	4	1.00079	0.921065	-0.0357099	51.272	4	7.4	4	4	0.70451	0.87649	-0.057253	18.545	4	2.9	2	2	0.83011	1.2094	0.08257	6.9739	2
	1218	Tb927.2.3800	Tb927.2.3800		guide RNA associated protein, GAP1,MRB1-associated protein	55.46	40.7	0	323.31	1	1	0.996787	-0.00139765	0.529317	0.276285		38.6	12	12	1.03056	0.922594	-0.0349892	9.2486	14	30.5	10	10	0.81809	1.0403	0.0171586	12.135	12	27	8	8	0.71298	1.0319	0.0136376	26.081	10
	340	Tb927.10.11570	Tb927.10.11570		hypothetical protein, conserved	78.596	14.7	0	28.687	1		0.995764	-0.00184362	0.52966	0.276002		11.3	6	6	1.20704	1.08533	0.0355614	13.824	5	8.1	5	5	0.79301	0.99842	-0.000686728	6.1085	5	4.6	3	3	0.63174	0.91116	-0.0404054	1.5768	3
	1761	Tb927.6.4510	Tb927.6.4510		hypothetical protein, conserved	36.573	4.3	0.00096852	3.7215	1	1	0.973772	-0.0115427	0.530078	0.27566		4.3	1	1	0.571559	0.524934	-0.279895	NaN	1	4.3	1	1	1.139	1.4273	0.154515	NaN	1	4.3	1	1	0.83378	1.2324	0.0907517	NaN	1
	499	Tb927.10.2690	Tb927.10.2690		hypothetical protein, conserved	74.002	10	0	17.066	1		0.990747	-0.00403719	0.530098	0.275644		4.3	2	2	1.20042	1.10065	0.0416512	20.897	2	6.7	3	3	0.87826	1.109	0.0449315	25.406	3	7	3	3	0.54898	0.79672	-0.0986943	73.439	3
	2156	Tb927.8.6820	Tb927.8.6820		hypothetical protein, conserved	47.159	34.7	0	60.206	1	1	0.986433	-0.00593228	0.53193	0.274145		20.9	7	7	1.4551	1.33264	0.124713	21.197	9	29.1	7	7	0.6877	0.86744	-0.0617606	26.518	7	16.3	5	5	0.57301	0.83033	-0.0807493	24.951	5
	576	Tb927.10.5450	Tb927.10.5450	nlp	nucleoplasmin-like protein (NLP)	107.29	15.3	0	26.436	1		0.988223	-0.00514497	0.532938	0.273324		4.9	3	3	0.853971	0.782044	-0.106769	34.309	3	9.3	6	6	0.97977	1.2095	0.0826059	23.953	6	6.6	5	5	0.74289	1.0203	0.00872789	18.264	5
	220	Tb11.v5.0902;Tb927.10.6700	Tb11.v5.0902;Tb927.10.6700		hypothetical protein, conserved;hypothetical protein, conserved	44.395	5.9	0	48.931	2		0.994656	-0.00232702	0.53332	0.273012		0	0	0	NaN	NaN		NaN	0	5.9	1	1	0.8252	1.0467	0.0198222	NaN	1	5.9	1	1	0.64276	0.9452	-0.0244763	NaN	1
	1011	Tb927.11.4320	Tb927.11.4320		hypothetical protein, conserved	51.878	56.6	0	323.31	1	1	0.998834	-0.000506777	0.533347	0.27299		53.3	17	17	1.06846	0.980969	-0.00834463	7.0659	24	52.6	17	17	0.81591	1.0227	0.00974826	10.809	24	49.7	14	14	0.69213	0.99329	-0.00292394	7.2183	18
	1586	Tb927.5.2780	Tb927.5.2780		mitochondrial DNA polymerase beta	46.102	22.9	0	43.389	1	1	0.996754	-0.00141199	0.533696	0.272706		15.7	5	5	1.0168	0.934405	-0.0294649	10.686	5	17.7	6	6	0.83438	1.0488	0.0206927	11.079	6	17.7	6	6	0.7013	1.0105	0.00453632	21.679	5
	1799	Tb927.7.1160	Tb927.7.1160		hypothetical protein, conserved	14.631	29.2	0	31.671	1	1	0.993482	-0.00283981	0.535223	0.271465		18.5	2	2	0.990099	0.908926	-0.0414717	30.191	2	29.2	3	3	0.76427	0.95573	-0.0196648	20.672	2	6.2	1	1	0.78312	1.1288	0.052617	NaN	1
	405	Tb927.10.1390	Tb927.10.1390		hypoxanthine-guanine phosphoribosyltransferase, putative	26.36	46.6	0	56.937	1		0.997998	-0.000870338	0.53538	0.271338		41.5	7	7	1.10488	1.03676	0.0156799	35.277	9	46.6	8	8	0.7717	0.96904	-0.0136583	15.319	8	37.2	6	6	0.67983	0.98939	-0.00463248	4.7956	7
	518	Tb927.10.3290	Tb927.10.3290		hypothetical protein, conserved	30.83	4	0.0099875	1.9487	1	1	0.993767	-0.00271562	0.535668	0.271104		4	1	1	1.17107	1.05055	0.021418	NaN	1	4	1	1	0.75104	0.94005	-0.026849	NaN	1	0	0	0	NaN	NaN		NaN	0
	1524	Tb927.4.5350	Tb927.4.5350		3-methylcrotonyl-CoA carboxylase, pseudogene, putative,3-methylcrotonyl-CoA carboxylase, point mutation	73.856	21.4	0	12.031	1	1	0.994541	-0.00237714	0.53634	0.27056		21.4	11	2	1.06973	0.970403	-0.013048	21.913	2	20.1	10	2	0.73495	0.92064	-0.0359102	0.78757	2	13.9	6	1	0.76549	1.1011	0.0418268	NaN	1
	542	Tb927.10.4010	Tb927.10.4010		hypothetical protein, conserved	73.756	8.7	0	30.028	1		0.991261	-0.00381211	0.536464	0.27046		8.7	4	4	1.2792	1.16565	0.0665685	66.001	4	3.2	1	1	0.70384	0.87494	-0.0580217	8.5295	2	3.2	1	1	0.65792	0.95503	-0.019983	8.4955	2
	2442	Tb927.9.9860	Tb927.9.9860		hypothetical protein, conserved	79.857	13.6	0	35.441	1		0.997101	-0.00126087	0.539472	0.268031		11.7	6	6	1.1253	1.02655	0.0113784	19.605	5	11.8	6	6	0.79437	1.0199	0.00855759	15.774	5	6.7	3	3	0.6569	0.94685	-0.0237188	8.9152	3
	2320	Tb927.9.2650	Tb927.9.2650		hypothetical protein, conserved	66.517	21.8	0	59.553	1		0.991189	-0.00384344	0.540235	0.267418		20.1	6	6	1.01569	0.924556	-0.0340666	14.617	8	15.5	5	5	0.70093	0.91026	-0.0408345	12.167	8	17.3	5	5	0.79891	1.1571	0.0633709	16.971	5
	917	Tb927.11.16830	Tb927.11.16830	RABL5	Rab-like 5, small G protein (RABL5)	24.466	8.7	0.0014361	3.5009	1		0.980091	-0.00873345	0.541479	0.266419		8.7	2	2	1.24867	1.14264	0.0579075	10.908	2	8.7	2	2	0.66698	0.84067	-0.0753745	6.1835	2	0	0	0	NaN	NaN		NaN	0
	1744	Tb927.6.4140	Tb927.6.4140	PFC4	paraflagellar rod component, putative (PFC4)	13.009	30.4	0	9.9457	1		0.986147	-0.00605833	0.541559	0.266354		9.6	1	1	1.08877	1.00118	0.000512599	NaN	1	19.1	2	2	0.6295	0.79777	-0.0981223	38.644	2	20.9	2	2	0.8294	1.2007	0.0794345	26.918	2
	2363	Tb927.9.5330	Tb927.9.5330		hypothetical protein, conserved	42.581	8.9	0	5.4856	1		0.987342	-0.00553224	0.541598	0.266323		2.4	1	1	1.32659	1.22452	0.0879641	NaN	1	8.9	3	3	0.69516	0.87539	-0.0577984	13.513	3	8.9	3	3	0.60663	0.89792	-0.0467624	10.925	3
	957	Tb927.11.2650	Tb927.11.2650		heat shock protein 84, putative	84.2	47.7	0	323.31	1		0.998987	-0.000440282	0.541645	0.266285		44.6	31	31	1.09308	1.00069	0.00029956	11.679	38	41.6	26	26	0.8107	1.013	0.00560945	14.285	31	33.5	19	19	0.6834	0.98349	-0.00723005	28.659	24
	1393	Tb927.3.5490	Tb927.3.5490	PIFTB2	flagellar transport protein, putative (PIFTB2)	77.659	9.3	0	10.477	1		0.988035	-0.00522766	0.541773	0.266183		4	2	2	1.31513	1.2101	0.0828202	13.412	2	7	3	3	0.72828	0.90148	-0.0450439	14.979	3	7.7	3	3	0.60832	0.88418	-0.0534593	11.118	2
	509	Tb927.10.3030;Tb927.10.2980	Tb927.10.3030;Tb927.10.2980	RPN11;RPN11	proteasome regulatory non-ATPase subunit 11,19S proteasome regulatory subunit, Metallo-peptidase, Clan MP, Family M67 (RPN11);proteasome regulatory non-ATPase subunit 11,19S proteasome regulatory subunit, Metallo-peptidase, Clan MP, Family M67 (RPN11)	33.847	15.7	0	25.143	2		0.972399	-0.0121553	0.541917	0.266067		0	0	0	NaN	NaN		NaN	0	15.7	3	3	0.95289	1.2012	0.0796153	20.646	3	9.5	2	2	0.53782	0.78718	-0.103926	7.7178	2
	1006	Tb927.11.4140	Tb927.11.4140		hypothetical protein, conserved	24.007	15	0	20.599	1	1	0.996906	-0.00134573	0.542275	0.265781		15	2	2	1.14981	1.0425	0.0180773	9.6727	2	10.8	1	1	0.79728	0.99691	-0.00134405	NaN	1	10.8	1	1	0.66165	0.9533	-0.0207704	NaN	1
	427	Tb927.10.14660	Tb927.10.14660		hypothetical protein, conserved	43.861	4.6	0	41.981	1		0.981852	-0.0079541	0.542406	0.265675		4.6	1	1	1.4379	1.29843	0.113419	NaN	1	4.6	1	1	0.76657	0.94762	-0.0233658	NaN	1	4.6	1	1	0.53231	0.76928	-0.113916	NaN	1
	365	Tb927.10.12660	Tb927.10.12660	PUF2	pumilio/PUF RNA binding protein 2 (PUF2)	92.245	20.7	0	93.607	1		0.994811	-0.00225937	0.542977	0.265218		14.2	10	10	1.03958	0.948047	-0.0231701	6.4246	13	15.8	11	11	0.84678	1.0831	0.0346686	7.1109	14	15.8	9	9	0.65809	0.95879	-0.0182765	13.184	12
	875	Tb927.11.15560	Tb927.11.15560	TbNup53a	Nucleoporin (TbNup53a)	52.786	10.4	0	22.601	1		0.996718	-0.00142767	0.544919	0.263668		10.4	4	4	1.16124	1.04654	0.0197558	5.8984	5	8.9	3	3	0.76796	0.95878	-0.018281	8.771	4	7.6	2	2	0.68261	0.98683	-0.00575766	1.9304	2
	1932	Tb927.7.5470;Tb11.v5.0586	Tb927.7.5470;Tb11.v5.0586		hypothetical protein, conserved;hypothetical protein, conserved	74.68	8	0	13.32	2		0.980427	-0.00858493	0.545069	0.263548		8	4	4	1.12353	1.02521	0.0108128	32.883	3	1.9	1	1	1.001	1.2493	0.0966667	NaN	1	1.8	1	1	0.50557	0.73581	-0.133234	NaN	1
	325	Tb927.10.11160	Tb927.10.11160		HIRA-interacting protein 5, putative	26.717	17.3	0	30.64	1	1	0.985994	-0.00612567	0.545229	0.263421		6.2	1	1	1.02016	0.935366	-0.0290183	NaN	1	17.3	3	3	0.97706	1.2176	0.0855046	27.519	3	7.8	1	1	0.58118	0.84166	-0.0748633	NaN	1
	302	Tb927.10.10330	Tb927.10.10330		hypothetical protein, conserved	62.877	5.7	0	5.9905	1		0.956852	-0.0191552	0.547101	0.261932		4.1	2	2	1.43121	1.28632	0.10935	39.22	2	1.6	1	1	NaN	NaN		NaN	0	3.8	2	2	0.48844	0.71177	-0.14766	NaN	1
	784	Tb927.11.1250	Tb927.11.1250		kinteoplast poly(A) polymerase complex 1 subunit,mitochondrial edited mRNA stability factor 1 subunit	98.264	19.8	0	52.303	1	1	0.996315	-0.00160349	0.547496	0.261619		17.6	11	11	1.13455	1.02909	0.0124542	8.8409	13	18.1	11	11	0.78874	0.94357	-0.0252259	23.62	14	12.7	7	7	0.70719	1.0185	0.00796103	4.0588	8
	1592	Tb927.5.3010;Tb11.v5.0691	Tb927.5.3010;Tb11.v5.0691	mrb3010	MRB1-associated protein, putative,guide RNA binding protein, putative;hypothetical protein, conserved	57.748	37.2	0	82.247	2	1	0.997271	-0.00118665	0.548869	0.260532		27.3	14	14	1.06272	0.972479	-0.0121199	10.864	16	29.5	13	13	0.78337	0.9838	-0.00709318	7.3564	15	28.1	12	12	0.71952	1.0367	0.0156531	14.622	13
	448	Tb927.10.15490	Tb927.10.15490		GDP-mannose 4,6 dehydratase, putative	40.548	17.1	0	30.093	1	1	0.987257	-0.00556981	0.54934	0.260159		9.7	2	2	1.12761	1.01115	0.00481687	15.348	2	9.7	2	2	0.65164	0.83375	-0.0789642	5.1225	2	17.1	4	4	0.78215	1.1414	0.0574379	10.549	4
	2268	Tb927.9.13540	Tb927.9.13540		hypothetical protein, conserved	41.261	10.4	0	21.766	1	1	0.995082	-0.00214109	0.550044	0.259603		10.4	3	3	1.03297	0.941176	-0.0263289	17.215	3	10.4	3	3	0.84871	1.0604	0.0254697	12.171	4	7.3	2	2	0.68819	0.98727	-0.00556406	12.175	3
	849	Tb927.11.14730	Tb927.11.14730		metalloprotease, putative,cell division protein FtsH homologue, putative	74.475	27	0	88.291	1	1	0.996834	-0.00137735	0.551038	0.258819		27	12	12	1.0976	0.978569	-0.00940841	24.081	16	17.6	8	8	0.76799	0.97217	-0.0122578	12.432	9	19.1	8	8	0.7295	1.0412	0.0175342	26.873	10
	2277	Tb927.9.1400	Tb927.9.1400		Monooxygenase, putative	51.432	8.3	0.0004931	3.9567	1	1	0.985004	-0.00656211	0.553048	0.257237		8.3	3	3	0.924556	0.828912	-0.0814914	37.704	2	5.5	2	2	0.916	1.1726	0.0691499	8.7015	2	3.3	1	1	0.6677	0.98323	-0.00734488	NaN	1
	1612	Tb927.5.3510	Tb927.5.3510	SMC3	structural maintenance of chromosome 3 , putative (SMC3)	136.37	4.5	0	17.606	1		0.969035	-0.0136607	0.553517	0.256869		2.8	2	2	0.717566	0.652827	-0.185202	59.527	2	2.6	2	2	0.84107	1.0628	0.0264515	13.588	3	2.9	2	2	0.8796	1.3115	0.117768	48.413	2
	1630	Tb927.5.4040	Tb927.5.4040		hypothetical protein, conserved	94.263	18.7	0	74.218	1	1	0.995957	-0.00175935	0.55409	0.25642		15.7	10	10	1.03607	0.945627	-0.0242804	8.6598	10	14.2	9	9	0.8222	1.0302	0.0129215	5.7643	8	10.6	7	7	0.70322	1.0141	0.00608078	25.615	6
	773	Tb927.11.11870	Tb927.11.11870		hypothetical protein, conserved	38.266	6	0	3.9821	1	1	0.989267	-0.00468631	0.555534	0.255289		2.9	1	1	1.14807	1.05172	0.0219018	NaN	1	3.2	1	1	0.7562	0.93052	-0.0312743	NaN	1	0	0	0	NaN	NaN		NaN	0
	591	Tb927.10.5930;Tb927.10.5940;Tb927.10.5950;Tb11.v5.0190	Tb927.10.5930;Tb927.10.5940;Tb927.10.5950;Tb11.v5.0190		protein kinase, putative;protein kinase, putative;protein kinase, putative;protein kinase, putative	54.749	16.7	0	32.771	4		0.99172	-0.00361082	0.555765	0.255109		15.1	5	5	1.20549	1.10121	0.0418709	12.72	6	10.2	4	4	0.74907	0.94352	-0.0252489	6.0654	3	15.1	5	5	0.65056	0.93874	-0.0274547	12.914	5
	1967	Tb927.7.6850;Tb927.7.6830;Tb927.8.7350;Tb927.8.7340	Tb927.7.6850;Tb927.7.6830	TS	trans-sialidase (TbTS);trans-sialidase, putative	84.543	16.7	0	22.521	4		0.979764	-0.00887855	0.555928	0.254981		8.4	6	6	1.30947	1.16536	0.066462	18.306	5	2.9	2	2	0.84094	1.0585	0.0246909	25.943	2	10.4	6	6	0.52915	0.76245	-0.117789	34.996	6
	1602	Tb927.5.3270	Tb927.5.3270		hypothetical protein, conserved	90.622	9.8	0	34.897	1		0.958682	-0.0183255	0.55629	0.254698		0	0	0	NaN	NaN		NaN	0	6.8	4	4	0.97025	1.214	0.0842187	49.427	3	6	3	3	0.5241	0.75706	-0.12087	10.535	3
	516	Tb927.10.3210	Tb927.10.3210		delta-1-pyrroline-5-carboxylate dehydrogenase, putative	62.036	59.5	0	323.31	1	1	0.99874	-0.000547758	0.557707	0.253594		52.4	26	26	1.0803	0.997705	-0.000997721	8.8734	36	53.3	24	24	0.78723	0.98609	-0.00608345	12.896	32	55.3	28	28	0.69167	1.0126	0.00543792	11.986	38
	2313	Tb927.9.2320	Tb927.9.2320		hypothetical protein, conserved	41.498	27.5	0	48.804	1		0.996775	-0.00140281	0.557831	0.253497		20.2	7	7	1.13865	1.01829	0.00787063	11.34	7	18	6	6	0.76538	0.95848	-0.0184169	22.251	6	14.2	5	5	0.69909	1.0147	0.00633766	35.703	5
	525	Tb927.10.3560	Tb927.10.3560		arginine N-methyltransferase, putative	42.121	18	0	31.328	1		0.970726	-0.0129032	0.558201	0.253209		18	6	6	0.747999	0.678656	-0.16835	26.035	6	12.3	4	4	0.94485	1.1817	0.0725072	39.349	4	12.3	4	4	0.79181	1.1406	0.0571334	19.495	4
	1569	Tb927.5.1880	Tb927.5.1880	ISP2	inhibitor of serine peptidase (ISP), putative,ecotin family (I11), putative	17.81	26	0	6.7717	1		0.993447	-0.00285521	0.558978	0.252605		11.7	1	1	1.08146	0.974089	-0.0114013	NaN	1	14.3	2	2	0.75191	0.93956	-0.0270755	NaN	1	7.1	1	1	0.74404	1.0713	0.0299111	NaN	1
	1017	Tb927.11.450	Tb927.11.450		hypothetical protein, conserved	90.205	9.3	0	13.305	1		0.964013	-0.015917	0.559102	0.252509		4.8	3	3	0.687522	0.625313	-0.203903	46.851	2	3.2	2	2	0.98471	1.2469	0.0958316	24.006	2	4.6	2	2	0.79048	1.149	0.06032	31.302	2
	526	Tb927.10.3570;Tb11.v5.1042	Tb927.10.3570;Tb11.v5.1042	KREX2	KREX2 (KREX2);RNA-editing complex protein, putative	99.416	12.3	0	53.06	2	1	0.988002	-0.00524227	0.561146	0.250924		9.8	7	7	1.10267	0.998004	-0.000867718	18.288	8	8.5	6	6	0.69288	0.87217	-0.0593989	19.477	7	4.6	3	3	0.76078	1.108	0.0445398	11.817	4
	1365	Tb927.3.4430	Tb927.3.4430		hypothetical protein, conserved	69.121	6.2	0	11.046	1		0.962965	-0.0163895	0.561349	0.250767		4.4	2	2	0.864528	0.793651	-0.100371	23.045	2	4.4	2	2	0.9432	1.1684	0.0675915	11.967	2	0	0	0	NaN	NaN		NaN	0
	304	Tb927.10.10390	Tb927.10.10390		trypanothione reductase	53.156	6.1	0	7.7172	1	1	0.931863	-0.0306477	0.562423	0.249937		1.6	1	1	0.716846	0.653253	-0.184918	NaN	1	4.5	2	2	1.0546	1.3293	0.123623	32.198	2	0	0	0	NaN	NaN		NaN	0
	2219	Tb927.9.10770	Tb927.9.10770	PABP2	Polyadenylate-binding protein 2 (Poly(A)-binding protein 2) (Poly(A)-binding protein II) (PABII) (Polyadenylate-binding nuclear protein 1) (Nuclear poly(A)-binding protein 1) (PABP2), putative (PABP2)	62.147	50.5	0	275.04	1		0.998063	-0.000842079	0.562655	0.249758		45.9	20	20	1.07172	0.984543	-0.00676544	14.394	27	44.5	23	23	0.81041	1.0197	0.00847242	8.3613	30	35.7	16	16	0.6859	0.9903	-0.00423322	8.7617	23
	652	Tb927.10.8060	Tb927.10.8060		hypothetical protein, conserved	51.643	12.5	0	11.662	1		0.975445	-0.0107971	0.564336	0.248462		10.1	3	3	0.884956	0.809258	-0.0919131	26.605	3	4.8	1	1	1.0116	1.2694	0.103598	NaN	1	7.2	2	2	0.62702	0.90349	-0.0440766	NaN	1
	1984	Tb927.7.7410	Tb927.7.7410		oxidoreductase, putative	35.787	64.5	0	323.31	1	1	0.996952	-0.00132578	0.564824	0.248087		64.2	18	18	1.13868	1.0293	0.0125437	15.089	26	58.8	15	15	0.78717	0.98831	-0.00510681	7.8011	20	60.6	17	17	0.67478	0.97406	-0.0114143	8.3022	22
	2357	Tb927.9.5040	Tb927.9.5040	PDEB1	cAMP-specific phosphodiesterase (PDEB1)	103.65	38.7	0	323.31	1		0.988698	-0.00493635	0.565674	0.247434		34	20	8	1.23277	1.10228	0.0422923	37.655	8	34.8	22	8	0.77602	0.98102	-0.00832214	7.8836	8	30	18	7	0.6171	0.89376	-0.0487791	13.363	8
	1292	Tb927.3.1920	Tb927.3.1920	NOT5	NOT5 protein (NOT5)	66.856	16.4	0	78.498	1		0.987701	-0.00537444	0.56769	0.245889		11.3	5	5	1.02094	0.929627	-0.0316912	8.5629	4	16.4	7	7	0.90557	1.1226	0.050225	27.312	8	13.4	5	5	0.65329	0.9233	-0.0346572	20.11	5
	919	Tb927.11.16860	Tb927.11.16860	MRB8620	mitochondrial RNA binding protein (MRB8620)	53.077	23.4	0	53.684	1	1	0.978423	-0.00947341	0.56792	0.245713		18.5	7	7	1.25754	1.15492	0.0625523	55.427	8	21.4	8	8	0.62647	0.78946	-0.10267	18.862	8	14.5	5	5	0.70509	1.0273	0.0116973	22.021	7
	671	Tb927.10.8820	Tb927.10.8820		hypothetical protein, conserved	84.701	6.7	0	15.381	1		0.964238	-0.0158159	0.568194	0.245504		2.3	1	1	1.33064	1.22209	0.0871032	NaN	1	2.3	1	1	0.52896	0.66659	-0.176141	NaN	1	4.3	3	3	0.73015	1.1005	0.04159	18.231	3
	1425	Tb927.4.1420	Tb927.4.1420		hypothetical protein, conserved	15.664	17.9	0	8.0394	1	1	0.99449	-0.00239943	0.568252	0.245459		17.9	3	3	1.05333	0.945627	-0.0242804	11.466	3	17.9	3	3	0.83393	1.0431	0.0183259	4.2067	3	10.4	2	2	0.68597	0.99714	-0.00124386	6.191	2
	237	Tb927.1.1200	Tb927.1.1200	MRPS15	hypothetical protein, conserved	50.307	6.3	0.0027064	2.5991	1	1	0.956473	-0.0193273	0.570238	0.243944		6.3	2	2	0.796369	0.727537	-0.138145	55.983	2	6.3	2	2	1.184	1.4839	0.171405	0.64139	2	2.8	1	1	0.56079	0.81051	-0.0912416	NaN	1
	2028	Tb927.8.1980	Tb927.8.1980		hypothetical protein, conserved	53.365	5.2	0.00049383	3.9678	1		0.953802	-0.0205417	0.570397	0.243823		5.2	2	2	1.28268	1.17712	0.0708215	0.014819	2	2.7	1	1	0.61288	0.77285	-0.111905	NaN	1	0	0	0	NaN	NaN		NaN	0
	458	Tb927.10.160	Tb927.10.160		RNA polymerase II	42.948	12	0	11.209	1		0.98115	-0.00826479	0.573112	0.241761		6.1	2	2	1.29636	1.17698	0.0707702	25.907	2	10.4	3	3	0.70749	0.89134	-0.0499566	24.588	3	7.7	3	3	0.62288	0.90031	-0.0456079	96.408	3
	372	Tb927.10.12900	Tb927.10.12900		hypothetical protein, conserved	18.063	13.5	0	23.083	1	1	0.980169	-0.00869883	0.573185	0.241705		13.5	2	2	1.2285	1.12886	0.0526397	1.9226	3	13.5	2	2	0.81164	1.0215	0.00923837	5.8973	2	9	1	1	0.56333	0.81663	-0.0879747	29.834	2
	2254	Tb927.9.12850	Tb927.9.12850		hypothetical protein, conserved	66.991	16	0	28.555	1	1	0.988509	-0.00501956	0.573626	0.241371		13.7	6	6	0.986583	0.893815	-0.0487525	44.578	8	6.7	3	3	0.77617	1.0009	0.000390689	7.1033	5	7.3	3	3	0.74975	1.0797	0.0333031	21.507	3
	2304	Tb927.9.1600	Tb927.9.1600		hypothetical protein, conserved	182.2	9.1	0	47.792	1		0.992422	-0.0033035	0.574477	0.240727		6.2	4	4	1.09349	0.998303	-0.000737711	21.419	4	6.1	4	4	0.74526	0.93035	-0.0313536	13.389	4	3.4	2	2	0.73155	1.0524	0.0221808	NaN	1
	2198	Tb927.8.920	Tb927.8.920	PEX4	ubiquitin-conjugating enzyme E2, putative,ubiquitin-protein ligase, putative,ubiquitin carrier protein, putative	18.992	32	0	25.463	1		0.953472	-0.020692	0.574826	0.240463		14	2	2	0.666089	0.61237	-0.212986	80.532	2	32	4	4	0.91582	1.1431	0.0580842	25.182	4	32	4	4	0.85644	1.2383	0.0928259	12.054	3
	692	Tb927.10.9740	Tb927.10.9740	RPT6	proteasome regulatory ATPase subunit 6,19S proteasome regulatory subunit (RPT6)	45.699	7.4	0	16.768	1		0.96841	-0.0139407	0.575416	0.240018		4.4	1	1	NaN	NaN		NaN	0	4.4	1	1	0.90125	1.1061	0.0437944	NaN	1	7.4	2	1	0.59306	0.84786	-0.0716759	NaN	1
	628	Tb927.10.7430	Tb927.10.7430		GTP-binding protein, putative	51.559	37.1	0	229.36	1	1	0.995937	-0.00176818	0.575479	0.239971		33.7	9	9	1.04219	0.963762	-0.01603	15.337	12	33.7	9	9	0.81595	1.0288	0.012331	14.64	12	22.9	6	6	0.69189	0.99631	-0.00160551	7.5877	8
	2106	Tb927.8.5220	Tb927.8.5220		hypothetical protein, conserved	114.05	9.1	0	34.69	1	1	0.986935	-0.00571139	0.577596	0.238375		6.7	4	4	1.05459	0.971817	-0.0124154	17.483	4	6.7	4	4	0.89662	1.101	0.0417873	37.554	4	5.2	4	4	0.6241	0.89845	-0.0465061	16.821	4
	2048	Tb927.8.2760	Tb927.8.2760		hypothetical protein, conserved	52.159	6.3	0	5.3341	1		0.972574	-0.0120773	0.578395	0.237775		6.3	3	3	1.1495	1.04323	0.0183805	7.4561	3	1.7	1	1	0.60705	0.76442	-0.116668	NaN	1	1.7	1	1	0.81532	1.1536	0.0620552	NaN	1
	901	Tb927.11.16420	Tb927.11.16420		hypothetical protein, conserved	33.387	28.6	0	24.555	1	1	0.986817	-0.00576347	0.578897	0.237399		15.2	3	3	0.981258	0.882145	-0.0544598	7.4218	3	24.6	4	4	0.81055	1.0126	0.00543792	24.497	4	24.6	4	4	0.74436	1.0758	0.0317315	16.401	4
	1794	Tb927.7.1030	Tb927.7.1030	HSP70	heat shock 70 kDa protein, putative (HSP70)	93.231	6.2	0	19.387	1	1	0.963247	-0.0162624	0.579847	0.236687		6.2	3	3	0.951203	0.867754	-0.0616033	15.975	4	2.2	1	1	0.62799	0.77574	-0.110284	NaN	1	2	1	1	0.91439	1.3277	0.1231	NaN	1
	2197	Tb927.8.890;Tb927.11.13750	Tb927.8.890	RAB4;Rab1A	small GTP-binding protein Rab1, putative	22.714	38	0	38.203	2		0.989538	-0.00456747	0.580847	0.235938		38	6	5	1.2173	1.08271	0.0345113	10.582	6	33.7	5	4	0.77825	0.93626	-0.0286035	11.276	5	33.7	4	3	0.66332	0.95585	-0.0196103	10.026	5
	987	Tb927.11.3540	Tb927.11.3540		hypothetical protein, conserved	36.638	5.4	0	56.645	1		0.979958	-0.00879239	0.580968	0.235848		5.4	1	1	1.21791	1.12964	0.0529389	NaN	1	5.4	1	1	0.78852	0.99631	-0.00160551	NaN	1	5.4	1	1	0.57359	0.83616	-0.0777106	NaN	1
	388	Tb927.10.1340	Tb927.10.1340		hypothetical protein, conserved	60.644	47.5	0	241.15	1	1	0.992405	-0.00331111	0.582649	0.234593		39.2	15	15	1.04519	0.959049	-0.0181594	15.246	17	44.9	17	17	0.84056	1.0583	0.0246088	22.408	20	28.5	11	11	0.67053	0.96298	-0.0163827	19.306	14
	1939	Tb927.7.5630	Tb927.7.5630		hypothetical protein, conserved	73.156	33	0	71.553	1	1	0.990308	-0.00422959	0.58306	0.234287		30	14	14	1.15368	1.0628	0.026452	16.137	17	26	13	13	0.79309	0.99062	-0.00409291	16.851	14	13.2	8	8	0.64305	0.92247	-0.0350477	18.496	10
	258	Tb927.1.2990	Tb927.1.2990		hypothetical protein, conserved	115.95	5.4	0	12.166	1	1	0.991816	-0.00356887	0.583967	0.233612		4.1	3	3	1.07271	0.96043	-0.0175342	12.076	3	3.5	3	3	0.84625	1.0618	0.0260427	6.633	3	1.3	1	1	0.66284	0.95672	-0.0192151	NaN	1
	2147	Tb927.8.6520	Tb927.8.6520		hypothetical protein, conserved	48.547	8.3	0	18.309	1	1	0.957109	-0.0190385	0.584999	0.232845		4.6	1	1	1.41143	1.30845	0.116759	NaN	1	3.7	1	1	0.74918	0.95431	-0.0203105	NaN	1	3.7	1	1	0.4622	0.70216	-0.153564	NaN	1
	1507	Tb927.4.4490	Tb927.4.4490	MRPE	multidrug resistance protein E,p-glycoprotein (MRPE)	193.8	10.7	0	63.828	1		0.993016	-0.0030439	0.586039	0.232074		9.2	12	12	1.12482	1.01574	0.00678427	11.473	14	9.3	12	12	0.81797	1.0271	0.0116127	19.765	12	5.9	7	7	0.64964	0.93858	-0.0275287	10.62	7
	1389	Tb927.3.5340	Tb927.3.5340		Hsc70-interacting protein (Hip), putative	42.028	26.3	0	113.01	1		0.978463	-0.00945548	0.587188	0.231223		14.8	4	4	0.976944	0.877886	-0.0565618	3.8845	5	22.4	7	7	0.72293	0.91831	-0.0370107	11.021	9	23.7	6	6	0.80061	1.162	0.0652061	19.878	8
	2289	Tb927.9.14290	Tb927.9.14290		hypothetical protein, conserved	49.833	13.2	0	9.5408	1		0.960056	-0.0177035	0.588379	0.230343		3	1	1	1.22419	1.11874	0.0487303	NaN	1	13.2	3	3	0.8953	1.1356	0.0552254	22.44	3	6.8	1	1	0.48202	0.69652	-0.157066	NaN	1
	2337	Tb927.9.3620	Tb927.9.3620		hypothetical protein, conserved	25.222	13.9	0	8.3255	1		0.982419	-0.00770315	0.590358	0.228885		13.9	3	3	1.02143	0.924471	-0.0341068	1.3011	3	4.3	1	1	0.82392	1.044	0.0187005	NaN	1	0	0	0	NaN	NaN		NaN	0
	1039	Tb927.11.5170	Tb927.11.5170		ubiquitin activating enzyme, putative	30.017	11.9	0	9.0117	1		0.962286	-0.016696	0.590726	0.228614		3.2	1	1	1.18356	1.0972	0.0402862	NaN	1	11.9	2	2	0.67442	0.84396	-0.0736781	12.857	2	0	0	0	NaN	NaN		NaN	0
	946	Tb927.11.2360	Tb927.11.2360	PheRS-beta	phenylalanyl-tRNA synthetase (beta subunit), putative	70.311	18.3	0	31.733	1	1	0.983876	-0.0070595	0.591244	0.228233		15.9	7	7	1.1707	1.04875	0.0206703	16.983	7	15.9	7	7	0.6939	0.86928	-0.0608403	13.19	7	14.4	6	6	0.71025	1.0447	0.0189916	20.542	6
	1808	Tb927.7.1340;Tb927.7.1320	Tb927.7.1340;Tb927.7.1320	HSP10;HSP10	10 kDa heat shock protein, putative (HSP10);10 kDa heat shock protein, putative (HSP10)	10.67	69	0	38.45	2		0.996632	-0.00146523	0.592585	0.22725		49	4	4	1.05124	0.972573	-0.0120776	4.7552	5	62	4	4	0.80568	1.0031	0.00134423	0.80803	4	42	3	3	0.70909	1.0147	0.00633766	4.4997	4
	1154	Tb927.11.9390	Tb927.11.9390		lipoate-protein ligase, putative,lipoyltransferase, putative	29.64	21.1	0	29.143	1	1	0.986354	-0.00596731	0.592702	0.227164		18.5	3	3	1.19878	1.09222	0.0383085	5.3807	3	21.1	4	4	0.75864	0.94927	-0.0226102	4.1832	3	21.1	4	4	0.63756	0.92555	-0.0336001	8.2938	4
	1783	Tb927.6.580	Tb927.6.580		hypothetical protein, conserved	66.692	24.8	0	100.32	1		0.987995	-0.00524535	0.593298	0.226727		20	6	6	1.01388	0.925669	-0.0335444	16.164	6	17.6	6	6	0.86879	1.077	0.0322157	19.094	7	17.1	6	6	0.66957	0.96737	-0.0144074	22.743	5
	1968	Tb927.7.6890	Tb927.7.6890		hypothetical protein, conserved	28.794	24	0	27.724	1		0.98677	-0.00578402	0.593766	0.226385		24	4	4	1.20793	1.08887	0.0369776	0.34316	4	15.7	3	3	0.75994	0.94437	-0.0248578	6.4766	4	20.1	3	3	0.65409	0.93439	-0.0294718	29.281	4
	1414	Tb927.3.970	Tb927.3.970		hypothetical protein, conserved	39.639	25.9	0	40.97	1	1	0.992453	-0.00329021	0.59565	0.225009		21.4	6	6	1.14987	1.04325	0.0183896	10.641	6	21.4	6	6	0.79169	0.98748	-0.00547169	12.784	8	20	5	5	0.6383	0.94888	-0.0227887	10.265	6
	2272	Tb927.9.13740;Tb927.9.13710;Tb927.9.13680;Tb927.9.13650	Tb927.9.13740;Tb927.9.13710;Tb927.9.13680;Tb927.9.13650		ADP-ribosylation factor, putative;ADP-ribosylation factor, putative;ADP-ribosylation factor, putative;ADP-ribosylation factor, putative	20.624	17	0	8.0706	4		0.941453	-0.0262015	0.595846	0.224866		5.5	1	1	1.40298	1.28923	0.110329	NaN	1	17	2	2	0.49723	0.61866	-0.208548	56.004	2	5.5	1	1	0.72122	1.0462	0.0196147	NaN	1
	1191	Tb927.2.1810	Tb927.2.1810	ISWI	transcription silencer (ISWI)	132.76	14	0	26.71	1		0.988599	-0.00497981	0.596447	0.224428		8.3	6	6	1.13664	1.04391	0.0186618	21.803	6	9.4	8	8	0.81851	1.0151	0.00650883	15.051	7	7.4	7	7	0.64504	0.91178	-0.0401099	29.353	6
	1941	Tb927.7.5740	Tb927.7.5740		hypothetical protein, conserved	55.838	5.6	0	5.9412	1		0.939403	-0.027148	0.59667	0.224266		5.6	2	2	1.29174	1.14678	0.0594786	12.748	3	3	1	1	0.59108	0.76953	-0.113774	NaN	1	2.6	1	1	NaN	NaN		NaN	0
	312	Tb927.10.10780	Tb927.10.10780		hypothetical protein, conserved	23.3	4.7	0	4.3861	1	1	0.980865	-0.00839094	0.596724	0.224226		4.7	1	1	1.01679	0.922254	-0.0351495	NaN	1	4.7	1	1	0.828	1.0432	0.0183676	NaN	1	0	0	0	NaN	NaN		NaN	0
	1372	Tb927.3.4790;Tb927.3.4750	Tb927.3.4790;Tb927.3.4750		aminopeptidase, putative,metallo-peptidase, Clan MA(E) Family M1;aminopeptidase, putative,metallo-peptidase, Clan MA(E) Family M1	97.251	26.1	0	85.631	2		0.990104	-0.00431925	0.596748	0.224209		20.4	16	16	1.15358	1.05489	0.0232055	6.9787	17	20.7	15	15	0.79591	0.98677	-0.00578406	13.344	15	18.3	12	12	0.64053	0.93244	-0.0303791	54.747	13
	1867	Tb927.7.320	Tb927.7.320	TbRBP8	hypothetical protein, conserved (TbRBP8)	20.27	47.2	0	74.399	1		0.992861	-0.00311174	0.597051	0.223989		34.4	4	4	1.1126	1.0079	0.00341831	7.1018	6	47.2	5	5	0.82219	1.0281	0.0120354	14.294	7	15.6	2	2	0.64717	0.94452	-0.0247888	10.961	2
	1535	Tb927.4.930	Tb927.4.930		50S ribosomal protein L14, putative	21.54	14.8	0	10.786	1	1	0.759888	-0.11925	0.597315	0.223797		14.8	2	2	1.99084	1.81376	0.258581	NaN	1	14.8	2	2	0.25184	0.31836	-0.497082	NaN	1	0	0	0	NaN	NaN		NaN	0
	2325	Tb927.9.3080	Tb927.9.3080		hypothetical protein, conserved	47.331	26.9	0	60.74	1		0.991012	-0.00392089	0.597331	0.223785		20.3	7	7	1.0184	0.929282	-0.0318526	6.3664	7	26.9	9	9	0.81225	1.022	0.0094509	9.2856	11	15.2	5	5	0.70956	1.0248	0.0106391	30.369	6
	985	Tb927.11.3520	Tb927.11.3520		hypothetical protein, conserved	27.352	10.4	0	33.34	1		0.965605	-0.0152003	0.597581	0.223603		7.5	1	1	0.924385	0.864528	-0.0632207	NaN	1	0	0	0	NaN	NaN		NaN	0	2.9	1	1	0.7411	1.0785	0.0328201	NaN	1
	1227	Tb927.2.4210	Tb927.2.4210	PEPCK	glycosomal phosphoenolpyruvate carboxykinase (PEPCK)	58.564	49.3	0	189.94	1		0.994899	-0.00222083	0.597635	0.223564		40.4	19	19	1.06231	0.976849	-0.0101727	7.0655	24	46.5	20	20	0.82222	1.0317	0.0135534	21.313	31	41.9	16	16	0.67642	0.97714	-0.0100432	12.687	22
	1918	Tb927.7.490	Tb927.7.490		hypothetical protein, conserved	60.593	5.5	0.00097182	3.7626	1		0.925703	-0.0335285	0.597674	0.223536		5.5	2	2	0.778392	0.725531	-0.139344	10.607	2	5.5	2	2	0.9514	1.1811	0.0722867	30.723	2	0	0	0	NaN	NaN		NaN	0
	1514	Tb927.4.4910	Tb927.4.4910		3,2-trans-enoyl-CoA isomerase, mitochondrial precursor, putative	45.333	11.5	0	9.7101	1	1	0.978536	-0.00942331	0.597687	0.223526		11.5	4	2	1.21008	1.11918	0.0489007	12.653	4	11.5	4	2	0.69226	0.85712	-0.0669584	6.7258	3	5	1	1	0.6658	0.97676	-0.0102121	14.46	2
	1467	Tb927.4.2880	Tb927.4.2880	TbNup225	Nucleoporin (TbNup225)	225.59	19.5	0	144.37	1		0.996133	-0.00168265	0.597916	0.22336		12.8	17	17	1.11185	1.0205	0.00881386	17.004	20	13.2	19	19	0.77148	0.97316	-0.0118158	52.495	22	14.8	18	18	0.68627	0.9953	-0.002046	18.739	19
	793	Tb927.11.12880	Tb927.11.12880		hypothetical protein, conserved	123.3	6	0	7.8634	1		0.976509	-0.0103237	0.597943	0.22334		4.7	4	2	1.15717	1.05235	0.0221623	5.6529	2	6	5	3	0.72182	0.90613	-0.0428095	6.4716	2	1	1	0	NaN	NaN		NaN	0
	1954	Tb927.7.6200	Tb927.7.6200		chaperone protein DNAj, putative	31.594	38.4	0	135.46	1	1	0.995537	-0.00194266	0.598406	0.223004		33.8	7	7	1.06673	0.979336	-0.00906828	10.264	7	29.9	6	6	0.78181	0.98062	-0.00849925	9.4047	6	22.5	4	4	0.71494	1.0274	0.0117396	9.4011	4
	2188	Tb927.8.8150	Tb927.8.8150		hypothetical protein, conserved	19.746	23.6	0	61.699	1		0.98374	-0.00711946	0.600399	0.22156		18.7	2	2	0.972573	0.884173	-0.0534626	31.405	2	23.6	3	2	0.85436	1.0719	0.0301543	7.366	2	23.6	3	2	0.69112	1.0045	0.00194994	4.296	2
	346	Tb927.10.11930	Tb927.10.11930		beta-D-hydroxybutyrate dehydrogenase	27.645	62.7	0	323.31	1	1	0.996724	-0.00142514	0.600451	0.221522		60.8	13	13	1.11105	1.01904	0.00818953	7.5111	23	62.7	15	15	0.79339	0.98976	-0.0044701	53.711	24	55.8	13	13	0.68529	0.98176	-0.00799467	6.3945	23
	1674	Tb927.6.1870	Tb927.6.1870		eukaryotic translation initiation factor 4e, putative	46.541	7.5	0	9.4362	1		0.960563	-0.0174744	0.600466	0.221512		7.5	3	3	0.841184	0.766636	-0.115411	45.421	4	4.9	2	2	0.98032	1.2367	0.0922644	NaN	1	4.9	2	2	0.6448	0.93481	-0.0292767	30.779	2
	1838	Tb927.7.2340;Tb927.7.2370	Tb927.7.2340;Tb927.7.2370		40S ribosomal protein S15, putative;40S ribosomal protein S15, putative	17.474	10.5	0	21.13	2		0.989762	-0.00446915	0.600626	0.221396		10.5	1	1	1.14608	1.05525	0.0233566	17.1	2	10.5	1	1	0.74841	0.93381	-0.0297415	NaN	1	10.5	1	1	0.68415	0.98396	-0.00702256	NaN	1
	2433	Tb927.9.9520	Tb927.9.9520	ZC3H29	zinc finger protein family member, putative (ZC3H29)	37.741	16.2	0	38.266	1		0.979545	-0.00897554	0.601969	0.220426		16.2	5	5	1.08731	0.99552	-0.00194997	6.6312	6	6.7	2	2	0.68995	0.86118	-0.0649061	3.4772	2	3.8	1	1	0.7621	1.0963	0.0399294	NaN	1
	497	Tb927.10.2640;Tb11.v5.0525	Tb927.10.2640		intraflagellar transport protein IFT81, putative	84.645	6.5	0	9.4841	2		0.980594	-0.00851058	0.602922	0.219739		6.5	3	3	1.14351	0.996611	-0.00147411	21.549	3	4.6	2	2	0.86402	1.0893	0.0371475	18.61	2	4.6	2	2	0.59826	0.86855	-0.0612052	2.6063	2
	419	Tb927.10.1440	Tb927.10.1440		hypothetical protein, conserved	24.717	8.8	0	5.438	1	1	0.937929	-0.0278299	0.60308	0.219625		8.8	1	1	1.24777	1.13523	0.0550831	NaN	1	8.8	1	1	0.61709	0.77492	-0.110743	NaN	1	0	0	0	NaN	NaN		NaN	0
	2179	Tb927.8.7770	Tb927.8.7770		hypothetical protein, conserved	60.341	37.4	0	323.31	1	1	0.98502	-0.00655475	0.603199	0.219539		33.8	11	11	1.18419	1.08794	0.0366041	9.5545	15	35.6	11	11	0.73762	0.92193	-0.0353021	9.6116	14	35.4	11	11	0.66159	0.95287	-0.0209663	12.316	16
	643	Tb927.10.770	Tb927.10.770		hypothetical protein, conserved	69.121	9.5	0	67.064	1	1	0.95484	-0.0200696	0.603281	0.21948		9.5	5	5	1.39583	1.25486	0.0985963	14.516	6	9.5	5	5	0.74915	0.94476	-0.0246785	13.942	6	4	2	2	0.50438	0.7343	-0.134126	0.51936	2
	446	Tb927.10.15410	Tb927.10.15410	gMDH	glycosomal malate dehydrogenase (gMDH)	33.71	33.4	0	86.806	1		0.998281	-0.000746997	0.603346	0.219433		26.6	8	8	1.09395	1.00368	0.00159657	3.8188	10	29.4	7	7	0.8043	1.0044	0.0019067	5.0766	7	30.3	7	7	0.67705	0.98686	-0.00574445	9.4566	9
	1023	Tb927.11.4780	Tb927.11.4780		pyruvate dehydrogenase (lipoamide) kinase, putative	51.187	24	0	51.106	1	1	0.992602	-0.00322468	0.604421	0.218661		17.5	6	6	1.06347	0.969932	-0.0132587	23.454	6	20.2	6	6	0.77391	0.96709	-0.0145331	8.5449	6	15.7	5	5	0.70927	1.0426	0.0181177	20.859	5
	2153	Tb927.8.6650	Tb927.8.6650	DRBD12	RNA-binding protein, putative (DRBD12)	71.652	28.8	0	93.992	1		0.982806	-0.00753212	0.604826	0.21837		25.8	10	10	1.20744	1.09963	0.041245	20.113	11	25.8	9	9	0.72527	0.91184	-0.0400814	11.354	13	8.3	3	3	0.65333	0.94676	-0.0237601	0.39817	4
	2165	Tb927.8.7100	Tb927.8.7100		acetyl-CoA carboxylase	242.91	5.8	0	22.166	1		0.944534	-0.0247823	0.605246	0.218068		0.7	1	1	0.843028	0.74206	-0.129561	NaN	1	5.1	7	7	0.67804	0.83125	-0.0802683	19.003	8	1.9	2	2	0.91845	1.3661	0.135482	34.581	2
	1973	Tb927.7.6990	Tb927.7.6990		hypothetical protein, conserved	32.721	11.3	0	15.049	1	1	0.975528	-0.0107604	0.605961	0.217555		11.3	3	3	1.2571	1.14533	0.058931	5.4458	4	8	2	2	0.70641	0.88565	-0.0527379	9.5958	2	4	1	1	0.64048	0.91522	-0.0384745	NaN	1
	2380	Tb927.9.6410	Tb927.9.6410		hypothetical protein, conserved	75.105	6	0	27.056	1	1	0.974467	-0.011233	0.607819	0.216226		6	3	3	1.22856	1.12902	0.0527036	8.3009	3	2.8	1	1	0.76453	0.96683	-0.0146499	NaN	1	2.8	1	1	0.58836	0.84771	-0.0717527	NaN	1
	565	Tb927.10.5010	Tb927.10.5010	EF-G1	Mitochondrial elongation factor G, putative	83.982	13.3	0	26.118	1	1	0.984256	-0.00689174	0.608272	0.215902		11.7	7	7	1.10472	0.993147	-0.00298633	7.963	6	8.8	5	5	0.85104	1.0692	0.029059	12.458	5	8	5	5	0.62524	0.89795	-0.0467478	8.6824	5
	1498	Tb927.4.4160	Tb927.4.4160	MRB4160	mitochondrial RNA binding protein (MRB4160)	102.78	11.7	0	11.023	1		0.973327	-0.0117413	0.6086	0.215668		5.4	3	1	0.901713	0.824538	-0.0837892	NaN	1	6.2	5	4	0.85966	1.0993	0.0411162	23.478	4	8.9	6	4	0.69904	1.0173	0.00744904	41.481	4
	314	Tb927.10.10830	Tb927.10.10830	RGG2	RGG2 (RGG2)	32.404	25.6	0	169.42	1	1	0.991403	-0.00374964	0.608636	0.215642		24.4	6	6	1.02528	0.942951	-0.0255107	7.1914	8	25.6	7	7	0.81708	1.0364	0.0155274	25.207	10	21.9	6	6	0.68915	0.99709	-0.00126564	12.248	8
	539	Tb927.10.3930;Tb927.10.3940;Tb11.v5.0501	Tb927.10.3930;Tb927.10.3940;Tb11.v5.0501		40S ribosomal protein S3A, putative;40S ribosomal protein S3A, putative;40S ribosomal protein S3A, putative	29.408	11.7	0	10.518	3		0.970829	-0.0128572	0.608679	0.215612		11.7	3	3	1.26089	1.1542	0.0622814	9.5045	3	9	2	2	0.66509	0.8354	-0.0781055	9.2735	2	4.7	1	1	0.65508	0.94897	-0.0227475	NaN	1
	1522	Tb927.4.5200	Tb927.4.5200	TbNup62	nucleoporin (NUP54/57), putative (TbNup62)	62.475	13.4	0	55.904	1		0.982165	-0.00781554	0.609687	0.214893		10.8	5	5	1.18524	1.08981	0.0373512	1.0248	5	13.4	6	6	0.76982	0.96917	-0.0136	11.54	9	5.6	2	2	0.61404	0.89702	-0.0471979	9.6918	2
	1888	Tb927.7.390;Tb927.7.450	Tb927.7.390;Tb927.7.450		hypothetical protein, conserved;hypothetical protein, conserved	47.004	6.4	0	22.697	2		0.960105	-0.0176815	0.61084	0.214073		4	1	1	1.29707	1.21433	0.0843364	NaN	1	6.4	2	2	0.62668	0.7865	-0.104301	22.275	2	4	1	1	0.64031	0.92666	-0.0330796	NaN	1
	1691	Tb927.6.2390	Tb927.6.2390		hypothetical protein, conserved	63.96	10	0	15.468	1		0.973271	-0.011766	0.614624	0.21139		5.4	3	3	0.927644	0.860363	-0.0653182	39.764	3	8.2	3	3	0.77452	0.94428	-0.0248992	6.1799	3	4.5	1	1	0.78939	1.1348	0.0549193	NaN	1
	697	Tb927.10.9860	Tb927.10.9860		Mitochondrial N(5)-glutamine methyltransferase MTQ1, putative	47.494	17.1	0	46.019	1		0.950035	-0.0222605	0.615099	0.211055		9.8	2	2	0.772022	0.701017	-0.154272	2.3394	2	17.1	4	4	0.90412	1.1438	0.0583501	11.016	3	15	3	3	0.73445	1.0694	0.0291402	10.929	3
	662	Tb927.10.8290;Tb927.10.8270;Tb11.v5.0877	Tb927.10.8290;Tb927.10.8270;Tb11.v5.0877		eukaryotic translation initiation factor 3 subunit 8, putative;eukaryotic translation initiation factor 3 subunit 8, putative;eukaryotic translation initiation factor 3 subunit 8, putative	84.339	4.9	0.0023452	3.1564	3		0.965235	-0.015367	0.615308	0.210908		1.5	1	1	1.28495	1.16596	0.0666848	NaN	1	3.1	2	2	0.76597	0.95292	-0.0209436	10.028	2	3.4	2	2	0.56218	0.80939	-0.0918422	9.193	2
	2223	Tb927.9.11120	Tb927.9.11120		hypothetical protein, conserved	72.949	6.8	0	9.7946	1	1	0.964917	-0.01551	0.615341	0.210884		4.3	2	2	0.976181	0.893495	-0.0489077	7.5202	2	2.5	1	1	0.67731	0.84424	-0.0735341	NaN	1	2.5	1	1	0.82203	1.191	0.0759118	NaN	1
	965	Tb927.11.2920	Tb927.11.2920		glycerolphosphate mutase, putative	33.71	21.3	0	15.125	1	1	0.959002	-0.0181803	0.615404	0.210839		13.7	4	4	1.14526	1.03507	0.0149689	17.214	4	14.4	4	4	0.60451	0.75141	-0.124123	52.334	4	10.3	3	3	0.77031	1.134	0.0546131	12.613	3
	1454	Tb927.4.2410	Tb927.4.2410		hypothetical protein, conserved	128.37	9.9	0	57.699	1		0.982263	-0.007772	0.615759	0.210589		4.9	4	4	0.990099	0.895656	-0.0478588	14.023	4	7.1	6	6	0.85725	1.0768	0.032135	19.978	6	7.1	5	5	0.67628	0.98267	-0.0075923	16.392	5
	1477	Tb927.4.3530	Tb927.4.3530		hypothetical protein, conserved	79.754	10.4	0	17.556	1		0.982343	-0.00773676	0.617657	0.209253		7.7	4	4	1.12358	1.00441	0.0019106	29.869	4	3.4	2	2	0.69816	0.88962	-0.0507955	28.759	2	3.1	2	2	0.72871	1.0609	0.0256744	15.015	2
	605	Tb927.10.6460	Tb927.10.6460		protein phosphatase 2B, putative	44.052	21.7	0	14.252	1		0.982193	-0.00780309	0.617706	0.209218		12.3	3	3	1.19272	1.08381	0.0349536	10.316	3	21.7	6	6	0.72685	0.90614	-0.0428047	3.193	6	6.6	2	2	0.67189	0.96481	-0.0155582	8.6133	2
	2257	Tb927.9.12950	Tb927.9.12950		hypothetical protein, conserved	45.35	4.7	0	4.7009	1		0.95262	-0.0210801	0.618091	0.208948		4.7	1	1	0.821963	0.718236	-0.143733	NaN	1	4.7	1	1	0.84421	1.0969	0.040167	NaN	1	4.7	1	1	0.72334	1.0973	0.0403254	NaN	1
	161	Tb927.10.510;Tb11.v5.0374	Tb927.10.510;Tb11.v5.0374		hypothetical protein, conserved;hypothetical protein, conserved	37.06	14.4	0	18.408	2	1	0.963176	-0.0162944	0.619107	0.208234		7.5	2	2	0.87184	0.797003	-0.0985399	22.807	2	9.9	2	2	0.77708	0.96716	-0.0145017	2.6214	2	6.9	1	1	0.79648	1.1592	0.0641584	NaN	1
	712	Tb927.11.10140	Tb927.11.10140		hypothetical protein, conserved	30.3	29.7	0	28.064	1	1	0.981433	-0.00813917	0.620765	0.207072		19.3	4	4	1.18823	1.09162	0.0380715	15.124	5	19.3	4	4	0.74546	0.93393	-0.0296857	8.632	6	26.4	5	5	0.64613	0.92725	-0.0328032	18.695	6
	1606	Tb927.5.3390	Tb927.5.3390		ADG1, pseudogene	13.175	40.7	0	33.032	1	1	0.979299	-0.0090849	0.620853	0.207011		40.7	6	6	1.20411	1.10137	0.0419332	18.601	5	31.4	5	5	0.74707	0.93751	-0.0280241	18.488	6	18.6	2	2	0.62657	0.90957	-0.0411639	12.223	2
	1778	Tb927.6.5100	Tb927.6.5100		serine/threonine-protein kinase, putative	91.952	16.3	0	62.409	1		0.98413	-0.00694732	0.621162	0.206795		10.9	7	7	1.14986	1.05669	0.0239484	24.197	7	12.8	8	8	0.7193	0.90473	-0.043481	25.278	7	10.1	6	6	0.6867	0.99699	-0.0013092	22.743	6
	772	Tb927.11.11860	Tb927.11.11860		leucine-rich repeat protein (LRRP), putative	77.501	13.3	0	35.061	1		0.985499	-0.00634396	0.622071	0.20616		6.3	4	4	1.20624	1.06741	0.02833	15.22	5	13.3	8	8	0.7556	0.96259	-0.0165587	12.192	8	3.4	3	3	0.64018	0.93153	-0.0308032	83.687	3
	629	Tb927.10.7440	Tb927.10.7440	MTR4	MTR4 (MTR4)	107.35	9.6	0	39.494	1		0.991435	-0.00373587	0.622202	0.206069		5.7	3	3	1.08314	0.955384	-0.0198222	11.237	3	7.8	4	4	0.79114	0.98326	-0.00733163	16.399	4	9.6	5	5	0.72155	1.0374	0.0159462	7.6775	4
	805	Tb927.11.13280	Tb927.11.13280	GBP25	mitochondrial RNA binding protein 2 (GBP25)	25.106	37.1	0	71.4	1	1	0.982877	-0.00750088	0.624935	0.204165		37.1	6	6	0.985416	0.894135	-0.0485971	11.51	9	37.1	6	6	0.82272	1.0324	0.013848	5.7674	9	37.1	6	6	0.7148	1.0286	0.0122465	4.6976	9
	2432	Tb927.9.9420	Tb927.9.9420		hypothetical protein, conserved	34.928	10.3	0	45.456	1	1	0.913459	-0.0393109	0.624945	0.204158		6.1	1	1	1.24125	1.13669	0.0556409	NaN	1	0	0	0	NaN	NaN		NaN	0	10.3	2	2	0.51057	0.73407	-0.134263	56.928	2
	160	Tb927.1.1310;Tb11.v5.0372	Tb927.1.1310;Tb11.v5.0372		hypothetical protein, conserved;hypothetical protein, conserved	47.016	6.3	0.0014218	3.2859	2		0.891805	-0.0497301	0.625041	0.204091		6.3	2	2	1.31917	1.17567	0.0702847	22.707	2	2.3	1	1	0.54036	0.67648	-0.169745	NaN	1	0	0	0	NaN	NaN		NaN	0
	955	Tb927.11.2610	Tb927.11.2610		hypothetical protein, conserved	50.887	8	0	34.324	1		0.970425	-0.0130381	0.625253	0.203944		8	2	2	1.17902	1.05459	0.0230816	33.26	2	3.5	1	1	0.65983	0.82358	-0.0842942	NaN	1	3.5	1	1	0.73159	1.0522	0.0220983	NaN	1
	2111	Tb927.8.5460;Tb927.8.5465;Tb927.8.5440;Tb11.v5.0798;Tb11.v5.0797;Tb927.8.5470	Tb927.8.5460;Tb927.8.5465;Tb927.8.5440;Tb11.v5.0798;Tb11.v5.0797;Tb927.8.5470	Tb-24;Tb-44;Tb-24;Tb-17	flagellar calcium-binding protein,44 kDa calflagin,44 kDa calcimedin (Tb-44);flagellar calcium-binding protein,24 kDa calflagin,24 kDa calcimedin (Tb-24);flagellar calcium-binding protein,24 kDa calflagin,24 kDa calcimedin (Tb-24);flagellar calcium-bind	45.718	16	0	33.965	6		0.969116	-0.0136243	0.626488	0.203087		16	4	4	0.893096	0.819269	-0.0865734	37.468	5	10.3	2	2	0.8196	1.0324	0.013848	26.74	3	13	3	3	0.7381	1.0761	0.0318526	11.249	3
	736	Tb927.11.10800	Tb927.11.10800		hypothetical protein, conserved	29.847	18.7	0	9.9473	1		0.956128	-0.019484	0.627129	0.202643		9.5	2	2	0.823723	0.75188	-0.123852	42.523	2	9.5	2	2	0.84252	1.0577	0.0243625	27.549	2	18.7	3	3	0.76073	1.0991	0.0410372	38.534	3
	1075	Tb927.11.6170	Tb927.11.6170		protein transport protein SEC31, putative,cytosolic coat protein, putative	131.1	11.4	0	72.418	1		0.972758	-0.0119952	0.627812	0.20217		3.7	2	2	1.20494	1.10531	0.0434857	7.1867	2	8.6	6	6	0.77908	0.97312	-0.0118336	8.932	8	8.9	6	6	0.58951	0.85578	-0.0676379	11.186	8
	2370	Tb927.9.5880	Tb927.9.5880		hypothetical protein, conserved	50.373	10.7	0	19.128	1		0.937793	-0.0278931	0.627817	0.202167		7.4	2	2	1.33524	1.22772	0.0890983	20.506	2	10.7	3	3	0.78883	0.98577	-0.0062244	9.8766	2	5.9	1	1	0.46786	0.68147	-0.166553	NaN	1
	1111	Tb927.11.7420	Tb927.11.7420		phosphoadenosine phosphosulfate reductase-like protein	36.057	12.7	0	14.882	1		0.986365	-0.00596256	0.627882	0.202122		8.7	2	2	1.01639	0.920725	-0.0358698	15.585	3	8.7	2	2	0.80027	0.99873	-0.000551905	8.1204	4	9.9	2	2	0.71534	1.0436	0.0185341	22.903	3
	558	Tb927.10.4680	Tb927.10.4680		NUDIX hydrolase, conserved,predicted MutT/NUDIX family protein	32.246	34.6	0	59.588	1		0.978097	-0.0096182	0.62795	0.202075		34.6	5	5	1.22087	1.06619	0.0278342	39.272	6	26.8	4	4	0.68131	0.87335	-0.0588117	27.176	4	30.2	4	4	0.69898	1.0049	0.00212285	36.57	4
	2103	Tb927.8.5120	Tb927.8.5120		cytochrome c	12.3	34.2	0	11.337	1		0.978014	-0.0096551	0.628448	0.201731		34.2	3	3	1.20163	1.09005	0.037446	6.8476	2	14	1	1	0.71162	0.88929	-0.0509566	NaN	1	14	1	1	0.66433	0.96504	-0.0154547	NaN	1
	687	Tb927.10.9420	Tb927.10.9420		ATP-dependent chaperone, putative,mitochondrial chaperone BCS1, putative	59.563	4.1	0	57.793	1	1	0.969599	-0.013408	0.628501	0.201694		4.1	1	1	0.997705	0.936154	-0.0286526	6.8452	2	4.1	1	1	0.69762	0.8588	-0.066108	10.403	2	4.1	1	1	0.77518	1.1338	0.0545365	0.62976	2
	2039	Tb927.8.2530	Tb927.8.2530		hypothetical protein, conserved	13.299	24.6	0	4.5293	1	1	0.97079	-0.0128747	0.629334	0.201119		9.6	1	1	0.919371	0.841963	-0.0747068	NaN	1	9.6	1	1	0.87548	1.1029	0.0425361	NaN	1	24.6	2	2	0.66935	0.98525	-0.00645356	30.744	3
	102	Tb927.7.2140;Tb07.11L3.90	Tb927.7.2140;Tb07.11L3.90	ZC3H18;ZC3H18	hypothetical protein,zinc finger protein family member, putative (ZC3H18);zinc finger protein family member, putative (ZC3H18)	40.864	4.5	0	22.815	2		0.959348	-0.0180238	0.629782	0.20081		4.5	1	1	0.943931	0.87146	-0.0597527	NaN	1	4.5	1	1	0.83506	1.0561	0.023705	0.51571	2	0	0	0	NaN	NaN		NaN	0
	1729	Tb927.6.3760	Tb927.6.3760	kkt15	hypothetical protein, conserved	36.051	16.6	0	6.226	1		0.964381	-0.0157515	0.630025	0.200642		13.3	2	2	1.27418	1.16068	0.0647144	NaN	1	13.3	2	2	0.72734	0.91327	-0.0394008	16.969	2	10.1	1	1	0.58812	0.84612	-0.072568	NaN	1
	996	Tb927.11.3890	Tb927.11.3890		N(2), N(2)-dimethylguanosine tRNA methyltransferase, putative	78.84	4.1	0.0014111	3.1919	1		0.960324	-0.0175822	0.630476	0.200332		2.5	1	1	0.967399	0.874891	-0.0580462	NaN	1	4.1	2	2	0.8457	1.0541	0.0228818	14.468	2	0	0	0	NaN	NaN		NaN	0
	1208	Tb927.2.3030	Tb927.2.3030		ATP-dependent Clp protease subunit, heat shock protein 78 (HSP78), putative	90.664	34.6	0	187.31	1		0.990882	-0.00397819	0.630969	0.199992		33.5	19	19	1.09428	0.990099	-0.00432138	12.237	24	30.8	17	17	0.81416	1.0331	0.0141424	13.419	22	26.6	14	14	0.65355	0.95114	-0.0217556	10.883	20
	2130	Tb927.8.6080	Tb927.8.6080		hypothetical protein, conserved	38.08	36.3	0	35.351	1	1	0.980004	-0.0087722	0.631228	0.199814		30	7	7	1.19796	1.08795	0.0366089	3.771	6	15	4	4	0.73276	0.92167	-0.0354245	37.399	2	31.2	9	9	0.63646	0.93864	-0.0275009	106.46	9
	1720	Tb927.6.3570	Tb927.6.3570		tubulin-tyrosine ligase-like protein, conserved	71.692	38.2	0	243.1	1	1	0.995034	-0.00216214	0.631596	0.199561		31.6	17	17	1.116	1.02072	0.00890705	5.4106	21	35.4	18	18	0.78165	0.97899	-0.00922174	16.342	20	30.5	14	14	0.6859	0.98589	-0.00617154	26.24	16
	1493	Tb927.4.4050	Tb927.4.4050	GAT1	glycosomal transporter (GAT1) (GAT1)	76.05	11.6	0	21.9	1		0.95098	-0.0218285	0.632533	0.198917		4.8	3	3	0.798594	0.737354	-0.132324	32.383	3	11.6	7	7	0.90133	1.124	0.0507663	12.43	7	3.2	2	2	0.71186	1.0377	0.0160718	42.057	2
	2377	Tb927.9.6270	Tb927.9.6270		hypothetical protein, conserved	57.132	19.1	0	48.058	1		0.979469	-0.00900915	0.633306	0.198386		19.1	5	5	1.02814	0.911411	-0.0402858	10.522	5	19.1	5	5	0.75221	0.94918	-0.0226514	3.8397	5	16.1	4	4	0.75186	1.0862	0.0359098	7.8528	4
	120	Tb927.11.18680;Tb11.0845	Tb927.11.18680;Tb11.0845	DYNLL2;DYNLL1	dynein light chain LC8, putative (DYNLL1);dynein light chain LC8, putative (DYNLL2)	10.429	21.1	0	6.0627	2		0.984948	-0.00658654	0.634784	0.197374		21.1	3	3	1.15332	1.0621	0.0261658	16.186	4	21.1	3	3	0.74894	0.93745	-0.0280519	16.787	4	12.2	1	1	0.66883	0.95968	-0.0178736	NaN	1
	1980	Tb927.7.7210	Tb927.7.7210		hypothetical protein, conserved	77.526	11.4	0	70.699	1		0.943684	-0.0251734	0.63558	0.196829		8.9	4	4	1.35139	1.23916	0.0931263	24.821	4	9.5	4	4	0.72633	0.89983	-0.0458395	15.975	6	6.9	3	3	0.51729	0.75369	-0.122807	38.433	3
	1088	Tb927.11.6570	Tb927.11.6570		hypothetical protein, conserved	67.604	9.9	0	30.672	1	1	0.936056	-0.0286982	0.636692	0.19607		9.7	4	4	1.36776	1.24536	0.0952953	20.808	5	5.9	3	3	0.75883	0.93465	-0.029351	28.089	4	3.6	1	1	0.48765	0.70463	-0.152039	NaN	1
	943	Tb927.11.2220	Tb927.11.2220		hypothetical protein, conserved	50.086	17.8	0	31.206	1	1	0.958352	-0.0184748	0.637669	0.195405		17.8	6	6	1.18566	1.08523	0.0355234	14.953	8	8.5	3	3	0.82288	1.0428	0.018201	11.947	3	10.3	3	3	0.53486	0.77777	-0.109149	20.265	3
	1726	Tb927.6.3690	Tb927.6.3690		pre-mRNA cleavage complex II Clp1-like, conserved	46.047	9.5	0	34.681	1		0.953071	-0.0208746	0.637952	0.195212		9.5	3	3	1.16399	1.0574	0.0242373	11.244	3	9.5	3	3	0.6825	0.85904	-0.0659866	10.112	3	0	0	0	NaN	NaN		NaN	0
	1087	Tb927.11.6540	Tb927.11.6540		hypothetical protein, conserved	60.154	43.6	0	265.49	1		0.996694	-0.00143807	0.638149	0.195078		43.5	15	15	1.07055	0.98068	-0.00847246	15.609	16	43.5	15	15	0.80139	1.0063	0.00272747	11.159	19	40	14	14	0.69198	1.0033	0.00143081	14.597	15
	187	Tb11.v5.0573;Tb927.11.8210	Tb11.v5.0573;Tb927.11.8210		RAD50 DNA repair-like protein, putative;RAD50 DNA repair-like protein	36.644	7.4	0	10.447	2		0.903115	-0.044257	0.638152	0.195076		7.4	1	1	0.585377	0.547315	-0.261762	NaN	1	7.4	1	1	0.93218	1.1818	0.072544	NaN	1	7.4	1	1	0.77858	1.1388	0.0564475	NaN	1
	384	Tb927.10.13210;Tb11.v5.0694	Tb927.10.13210;Tb11.v5.0694		dolichyl-P-Man:GDP-ManGlcNAc2-PP-dolichyl beta-1,4-mannosyltransferase, putative;glycosyltransferase, putative	68.515	8.7	0	10.614	2		0.972191	-0.0122483	0.638316	0.194965		3.4	2	2	0.940115	0.859033	-0.0659903	14.37	2	5.6	3	3	0.87202	1.0916	0.0380635	20.776	2	7.2	4	4	0.67272	0.9799	-0.00881824	40.708	4
	2114	Tb927.8.5540	Tb927.8.5540	Isa1	hypothetical protein, conserved	29.536	17.3	0	26.586	1	1	0.981206	-0.00823968	0.638579	0.194785		17.3	4	4	1.07002	0.977422	-0.00991811	19.685	4	16.9	3	3	0.82174	1.0655	0.0275535	9.2044	3	12.9	3	3	0.63014	0.90708	-0.0423544	8.3335	4
	363	Tb927.10.1260	Tb927.10.1260	AspRS-2	aspartyl-tRNA synthetase, putative	60.842	17.7	0	36.024	1	1	0.977972	-0.00967375	0.639299	0.194296		16.1	8	8	1.19921	1.08852	0.0368356	14.826	8	15.9	8	8	0.72011	0.91265	-0.0396957	14.088	9	10.4	5	5	0.6509	0.94154	-0.0261612	14.148	6
	1703	Tb927.6.2630	Tb927.6.2630		hypothetical protein, conserved	48.676	8.2	0	9.4417	1		0.97723	-0.0100033	0.639417	0.194216		8.2	3	3	1.11647	1.02649	0.0113564	19.71	3	5.7	2	2	0.75193	0.93033	-0.031363	32.551	2	0	0	0	NaN	NaN		NaN	0
	344	Tb927.10.1180	Tb927.10.1180		hypothetical protein, conserved	52.863	6.4	0	4.9713	1	1	0.9514	-0.0216367	0.640601	0.193413		4	2	2	1.14608	1.03951	0.0168295	27.579	2	2.5	1	1	0.59997	0.74999	-0.124945	NaN	1	2.5	1	1	0.75497	1.1046	0.043205	NaN	1
	1567	Tb927.5.1820	Tb927.5.1820		60S acidic ribosomal protein, putative	10.132	13.1	0.0035556	2.4937	1		0.986898	-0.00572788	0.641332	0.192917		13.1	1	1	1.07766	0.977613	-0.00983317	NaN	1	13.1	1	1	0.83077	1.0468	0.0198637	NaN	1	13.1	1	1	0.64931	0.93926	-0.0272142	NaN	1
	1463	Tb927.4.2740	Tb927.4.2740		hypothetical protein, conserved	16.327	15.3	0	7.2589	1		0.977633	-0.0098243	0.641574	0.192753		15.3	2	2	1.20036	1.07373	0.0308963	31.843	2	15.3	2	2	0.76688	0.97779	-0.00975441	22.662	2	15.3	2	2	0.6114	0.88999	-0.0506149	20.429	2
	1497	Tb927.4.410	Tb927.4.410	CAF40	CAF 40 (CAF40)	35.32	29.4	0	52.919	1		0.967266	-0.0144539	0.64208	0.192411		10.8	3	3	1.23686	1.12685	0.0518657	15.774	4	20.9	5	5	0.73709	0.93064	-0.0312183	13.662	6	20.3	5	5	0.59938	0.86296	-0.0640093	6.6239	7
	1690	Tb927.6.2380	Tb927.6.2380		hypothetical protein, conserved	81.636	4.7	0	6.0093	1	1	0.968321	-0.0139805	0.642245	0.1923		4.7	2	2	1.11746	1.0356	0.0151937	1.0143	2	0	0	0	NaN	NaN		NaN	0	2.6	1	1	0.61939	0.90541	-0.0431547	NaN	1
	1991	Tb927.7.850	Tb927.7.850		hypothetical protein, conserved	36.845	18.6	0	48.2	1		0.997181	-0.00122582	0.642414	0.192185		15.6	4	4	1.081	0.993739	-0.00272745	8.5342	5	18.6	5	5	0.79343	0.98774	-0.00535736	11.911	6	18.6	5	5	0.7029	1.0102	0.00440736	19.357	5
	551	Tb927.10.4280	Tb927.10.4280		hypothetical protein, conserved	24.055	20.9	0	14.681	1	1	0.979996	-0.00877569	0.642699	0.191992		20.9	3	3	1.08922	1.00293	0.00126976	25.276	5	20.9	3	3	0.71763	0.89366	-0.0488277	4.2579	6	20.9	3	3	0.7309	1.0501	0.0212307	7.6202	5
	1125	Tb927.11.8310	Tb927.11.8310	CITFA-4	class I transcription factor A, subunit 4 (CITFA-4)	42.733	10.3	0	6.5669	1		0.904877	-0.0434106	0.643217	0.191642		7.2	2	2	1.17041	1.06952	0.0291885	19.021	2	7	2	2	0.98996	1.2208	0.0866445	41.353	2	3.1	1	1	0.40119	0.56746	-0.246065	NaN	1
	584	Tb927.10.5760	Tb927.10.5760		adenylate kinase, putative	24.31	33.5	0	19.206	1		0.973696	-0.0115767	0.644248	0.190947		33.5	6	6	0.956023	0.872676	-0.0591467	15.613	6	33.5	6	6	0.85855	1.0838	0.0349491	26.187	6	23.7	4	4	0.67238	0.97604	-0.0105324	7.7899	4
	1540	Tb927.5.1030	Tb927.5.1030	Isa2	hypothetical protein, conserved	19.07	15	0	10.691	1	1	0.96045	-0.0175251	0.64429	0.190918		15	2	2	0.970026	0.884095	-0.053501	20.741	2	8.7	1	1	0.82451	1.0434	0.0184508	NaN	1	0	0	0	NaN	NaN		NaN	0
	1658	Tb927.6.1200	Tb927.6.1200		hypothetical protein, conserved	52.96	30.6	0	85.502	1	1	0.996407	-0.00156339	0.645098	0.190375		21.6	9	9	1.10118	1.00034	0.000147635	10.178	11	26.9	9	9	0.76866	0.98049	-0.00855683	11.201	9	28	9	9	0.69617	1.0086	0.00371896	3.1741	10
	1307	Tb927.3.2280	Tb927.3.2280		vacuolar sorting protein 33 , putative	66.938	12.7	0	17.641	1		0.936977	-0.0282713	0.645848	0.18987		3.5	2	2	0.800576	0.716332	-0.144885	27.557	2	10.1	5	5	0.76045	0.95093	-0.0218515	31.83	5	7	3	3	0.83969	1.2076	0.0819231	39.348	3
	2089	Tb927.8.4500;Tb11.v5.0763	Tb927.8.4500;Tb11.v5.0763	eif4g5	eukaryotic translation initation factor 4 gamma, putative;hypothetical protein, conserved	84.574	13.4	0	18.288	2		0.877935	-0.0565374	0.646977	0.189111		10.7	6	6	1.59959	1.48383	0.171385	73.707	5	11.5	7	7	0.68824	0.8666	-0.0621813	40.823	7	2.3	1	1	0.36069	0.52624	-0.278816	NaN	1
	153	Tb927.10.15950;Tb11.v5.0305	Tb927.10.15950;Tb11.v5.0305	TRF4	TFIID-like protein, putative (TRF4);TFIID-like protein, putative	28.822	17.6	0.0035492	2.4732	2		0.946925	-0.0236845	0.647818	0.188547		11.1	1	1	1.24908	1.1295	0.0528851	NaN	1	17.6	2	2	0.59669	0.74436	-0.128217	NaN	1	17.6	2	2	0.69736	1.0099	0.00427837	9.9797	2
	1258	Tb927.2.820;Tb11.v5.0670;Tb927.10.70;Tb11.v5.0532	Tb927.2.820;Tb11.v5.0670;Tb927.10.70;Tb11.v5.0532		retrotransposon hot spot protein (RHS, pseudogene), putative,retrotransposon hot spot protein 1 (RHS1), interrupted;retrotransposon hot spot (RHS) protein, putative;retrotransposon hot spot (RHS), putative, (fragment);retrotransposon hot spot (RHS) prot	60.527	5.9	0	6.3375	4	1	0.969577	-0.0134176	0.650347	0.186855		4.2	2	1	1.22561	1.10952	0.0451355	16.217	2	5.9	3	1	0.70589	0.88156	-0.0547481	6.7458	2	4.6	2	1	0.64448	0.93188	-0.03064	10.54	2
	878	Tb927.11.15700	Tb927.11.15700		hypothetical protein, conserved	19.138	11.2	0.004793	2.2975	1	1	0.924071	-0.0342945	0.650446	0.186789		4.3	1	1	0.853971	0.791828	-0.101369	NaN	1	6.8	1	1	0.82433	1.0784	0.0327799	NaN	1	0	0	0	NaN	NaN		NaN	0
	1484	Tb927.4.3680	Tb927.4.3680		protein phosphatase 2C, putative	29.99	69.5	0	177.61	1	1	0.991417	-0.00374363	0.651251	0.186252		69.5	14	14	1.09345	1.0072	0.00311615	5.6934	15	57	13	13	0.75961	0.95424	-0.0203424	10.562	14	56.6	10	10	0.6963	1.0139	0.00599512	20.18	10
	704	Tb927.10.9970	Tb927.10.9970		hypothetical protein, conserved	110	26.3	0	199.77	1	1	0.991666	-0.00363447	0.651295	0.186222		22.1	19	19	1.0586	0.974659	-0.0111474	14.151	20	25.5	21	21	0.8166	1.0293	0.012542	23.341	23	17.1	14	14	0.66893	0.97208	-0.012298	31.823	13
	621	Tb927.10.7110	Tb927.10.7110		inositol-3-phosphate synthase, putative	58.274	11.7	0	46.203	1		0.946972	-0.0236628	0.651893	0.185824		5.1	2	2	0.827883	0.746826	-0.126781	13.407	2	9.8	3	3	0.88641	1.1087	0.044814	15.613	4	9.3	3	3	0.70844	1.0256	0.010978	9.1629	3
	1122	Tb927.11.8120	Tb927.11.8120		protein transport protein SEC13, putative	35.125	13.5	0	80.658	1		0.933525	-0.029874	0.652318	0.185541		0	0	0	NaN	NaN		NaN	0	13.5	2	2	0.64617	0.81759	-0.0874644	5.0204	4	13.5	2	2	0.73731	1.0659	0.0277165	31.624	3
	2116	Tb927.8.5580	Tb927.8.5580		hypothetical protein, conserved	526.41	10	0	215.6	1		0.964521	-0.0156883	0.652414	0.185477		6.6	23	23	1.23253	1.12651	0.0517339	23.099	23	8.5	28	28	0.68653	0.86427	-0.0633506	16.776	28	4.5	16	16	0.63278	0.92162	-0.0354481	18.834	15
	1574	Tb927.5.2070	Tb927.5.2070		hypothetical protein, conserved	68.756	57.1	0	323.31	1	1	0.986994	-0.00568568	0.653619	0.184676		49.8	24	24	1.15407	1.04525	0.0192198	21.231	32	46.2	21	21	0.75913	0.95908	-0.0181452	34.765	29	27.8	12	12	0.66656	0.95911	-0.0181316	8.3803	15
	794	Tb927.11.1290	Tb927.11.1290		hypothetical protein, conserved	43.112	34.4	0	106.31	1	1	0.994287	-0.0024884	0.653634	0.184665		28.6	8	8	1.1209	1.0142	0.00612318	8.9057	9	20.1	5	5	0.77311	0.97145	-0.0125795	12.506	6	32.7	8	8	0.68974	0.99768	-0.00100873	26.574	9
	2276	Tb927.9.13990	Tb927.9.13990	DRBD2	RNA-binding protein, putative (DRBD2)	34.618	15.7	0	39.348	1		0.988998	-0.0048044	0.654276	0.184239		15.7	4	4	1.1065	1.0168	0.00723468	6.2938	5	15.7	4	4	0.79376	1.0093	0.00402027	13.731	4	9.5	2	2	0.65383	0.94261	-0.025668	13.306	2
	2333	Tb927.9.3400	Tb927.9.3400		endo-beta-N-acetylglucosaminidase, putative	115.9	17.2	0	81.758	1		0.993224	-0.00295259	0.654755	0.183921		14.7	10	10	1.05919	0.96432	-0.0157787	37.636	11	11.5	8	8	0.80491	1.0085	0.0036759	24.107	9	10.6	8	8	0.69168	1.0075	0.00324505	97.741	8
	664	Tb927.10.8410	Tb927.10.8410		hypothetical protein, conserved	27.797	10.5	0.0023321	3.0589	1		0.920203	-0.0361164	0.65607	0.18305		2.9	1	1	0.767048	0.698861	-0.155609	NaN	1	7.6	2	2	1.0418	1.2875	0.109747	32.285	2	7.6	2	2	0.60464	0.86599	-0.0624871	NaN	1
	1185	Tb927.11.9940	Tb927.11.9940		hypothetical protein, conserved	20.599	46.8	0	42.131	1		0.982976	-0.00745719	0.656145	0.183		40.9	8	8	1.00596	0.914411	-0.0388585	20.48	10	35.5	6	6	0.82659	1.0326	0.0139321	5.4458	6	29	5	5	0.69609	1.0059	0.00255481	4.3834	4
	1616	Tb927.5.3640	Tb927.5.3640		hypothetical protein, conserved	30.64	30	0	20.009	1	1	0.892204	-0.0495356	0.657075	0.182385		23.7	5	5	0.621388	0.557445	-0.253798	84.119	4	26.3	5	5	0.80733	1.0102	0.00440736	31.478	5	26.3	5	5	0.87516	1.2612	0.100784	18.324	5
	470	Tb927.10.1950	Tb927.10.1950		leucine-rich repeat protein (LRRP), putative	77.026	45	0	323.31	1	1	0.991149	-0.00386116	0.65737	0.18219		43.6	25	25	1.0372	0.95511	-0.0199467	9.8239	32	39.9	23	23	0.80861	1.0168	0.00723554	10.147	30	39.5	22	22	0.69707	1.0026	0.0011277	14.618	28
	421	Tb927.10.1450	Tb927.10.1450		hypothetical protein, conserved	329.64	19.7	0	38.679	1		0.982083	-0.00785201	0.658819	0.181234		19.7	3	3	1.05987	0.957946	-0.0186589	4.0996	2	8.9	1	1	0.73783	0.93414	-0.029588	NaN	1	8.9	1	1	0.72548	1.0585	0.0246909	NaN	1
	1999	Tb927.8.1060	Tb927.8.1060		malonyl-CoA decarboxylase, mitochondrial precursor, putative	82.379	29.6	0	210.39	1	1	0.995587	-0.00192068	0.660243	0.180296		26.2	17	17	1.09697	1.01302	0.00561673	12.371	21	26.5	16	16	0.7809	0.98156	-0.00808315	17.031	18	24.7	15	15	0.68766	0.99244	-0.00329574	34.092	16
	2112	Tb927.8.5510	Tb927.8.5510		apurinic/apyrimidinic endonuclease, putative	44.375	15.7	0	18.832	1		0.958937	-0.0182101	0.66095	0.179831		13.1	4	4	1.03683	0.915667	-0.0382624	10.896	4	13.4	4	4	0.8871	1.1352	0.0550724	14.909	4	2.8	1	1	0.57129	0.84832	-0.0714403	NaN	1
	934	Tb927.11.1970	Tb927.11.1970		hypothetical protein, conserved	30.39	4.4	0.0091935	1.967	1		0.978329	-0.00951505	0.661196	0.17967		4.4	1	1	1.04585	0.958681	-0.0183259	NaN	1	4.4	1	1	0.84513	1.0672	0.0282458	NaN	1	4.4	1	1	0.63399	0.91524	-0.038465	NaN	1
	2288	Tb927.9.14280	Tb927.9.14280		hypothetical protein, conserved	186.85	6.5	0	23.913	1		0.933666	-0.0298086	0.661399	0.179537		4.7	5	5	1.20621	1.11665	0.0479151	26.449	5	3.9	4	4	0.83159	1.0341	0.0145625	48.641	3	3.4	3	3	0.48401	0.70485	-0.151903	79.547	3
	1257	Tb927.2.6070	Tb927.2.6070	MRB6070	mitochondrial RNA binding complex 1 subunit (MRB6070)	31.486	27.4	0	63.384	1	1	0.991976	-0.00349894	0.661613	0.179396		27	5	5	1.06128	0.966838	-0.0146465	5.7715	5	27	5	5	0.79908	0.98642	-0.00593813	9.6024	5	27.4	6	6	0.70844	1.0235	0.0100878	13.08	7
	2063	Tb927.8.3160	Tb927.8.3160		hypothetical protein, conserved	18.646	10	0	11.32	1		0.941063	-0.0263814	0.661959	0.179169		10	1	1	1.32508	1.20938	0.0825628	NaN	1	10	1	1	0.66391	0.83407	-0.0787975	NaN	1	10	1	1	0.57033	0.82621	-0.0829096	NaN	1
	1790	Tb927.6.850;Tb11.v5.0689	Tb927.6.850;Tb11.v5.0689	NOT2	ccr4-not transcription complex subunit 2;hypothetical protein, conserved	37.396	22.4	0	43.875	2		0.994054	-0.00259014	0.662116	0.179066		17.9	4	4	1.08268	0.992753	-0.00315884	15.93	4	19.1	4	4	0.77322	0.97376	-0.0115481	5.9706	4	11.8	2	2	0.70022	1.0161	0.00693645	9.1428	2
	828	Tb927.11.1400	Tb927.11.1400		hypothetical protein, conserved	94.046	7.3	0	24.793	1	1	0.984352	-0.00684942	0.663009	0.178481		6.2	4	4	1.02931	0.938967	-0.0273496	18.87	4	5.4	4	4	0.78191	0.97	-0.0132283	3.2246	4	6.2	4	4	0.73757	1.0472	0.0200296	15.935	4
	1953	Tb927.7.620	Tb927.7.620		hypothetical protein, conserved	43.012	22.5	0	28.431	1	1	0.847413	-0.0719049	0.664571	0.177459		18.5	4	4	0.495589	0.447347	-0.349355	45.84	4	10.6	3	3	1.1143	1.3961	0.144917	40.134	3	14.7	4	4	0.67916	0.97437	-0.0112761	19.453	4
	2401	Tb927.9.7550	Tb927.9.7550	ADSL	adenylosuccinate lyase, putative (ASL)	53.119	5.5	0	6.4505	1		0.921875	-0.035328	0.664715	0.177364		0	0	0	NaN	NaN		NaN	0	5.5	1	1	0.64977	0.79911	-0.0973934	NaN	1	5.5	1	1	0.74323	1.0635	0.0267375	NaN	1
	568	Tb927.10.5050	Tb927.10.5050		hypothetical protein, conserved	8.6908	29.3	0	9.0238	1	1	0.980781	-0.00842814	0.665106	0.177109		29.3	2	2	1.13817	1.05233	0.0221532	9.7098	2	18.7	1	1	0.78324	0.97564	-0.0107104	38.627	2	18.7	1	1	0.63514	0.91891	-0.036727	28.389	2
	1266	Tb927.3.1270	Tb927.3.1270		hypothetical protein, conserved	60.836	6.9	0	4.7283	1		0.90639	-0.0426849	0.665375	0.176934		3.3	1	1	0.750638	0.654279	-0.184237	NaN	1	4.8	2	2	1.048	1.2974	0.113074	11.878	2	2	1	1	0.59896	0.87722	-0.0568915	NaN	1
	1641	Tb927.5.680	Tb927.5.680		hypothetical protein, conserved	65.263	7.9	0	23.88	1	1	0.846939	-0.0721479	0.665423	0.176902		7.9	2	2	1.24123	1.13227	0.0539508	13.506	2	0	0	0	NaN	NaN		NaN	0	2.7	1	1	0.44432	0.63351	-0.198247	NaN	1
	726	Tb927.11.10570	Tb927.11.10570		hypothetical protein, conserved	39.513	20.7	0	13.383	1	1	0.988043	-0.00522413	0.665969	0.176546		3.3	1	1	1.07512	0.970874	-0.0128372	NaN	1	3.3	1	1	0.8274	1.0364	0.0155274	NaN	1	20.7	5	5	0.66204	0.9586	-0.0183626	16.339	5
	2246	Tb927.9.12630;Tb927.9.12590;Tb927.9.12570;Tb927.9.12550;Tb927.9.12610	Tb927.9.12630;Tb927.9.12590;Tb927.9.12570;Tb927.9.12550;Tb927.9.12610	glk1;glk1;glk1;glk1;glk1	glycerol kinase, glycosomal (glk1);glycerol kinase, glycosomal (glk1);glycerol kinase, glycosomal (glk1);glycerol kinase, glycosomal (glk1);glycerol kinase, glycosomal (glk1)	56.426	63.3	0	323.31	5		0.994086	-0.00257591	0.667234	0.175722		63.3	32	32	1.06952	0.970874	-0.0128372	6.9158	58	58.8	29	29	0.79735	1.0054	0.00233888	8.9685	47	55.1	25	25	0.6924	1.0064	0.00277063	12.589	47
	817	Tb927.11.1360	Tb927.11.1360		hypothetical protein, conserved	62.477	11.3	0	17.471	1		0.946891	-0.0237001	0.667723	0.175404		3.7	2	2	0.807559	0.763068	-0.117437	30.634	3	6.9	3	3	0.79678	1.0369	0.0157369	10.025	5	8.1	3	3	0.73689	1.073	0.0305997	4.9043	4
	483	Tb927.10.2290	Tb927.10.2290		chaperone protein DNAj, putative	46.795	12.5	0	13.178	1		0.963719	-0.0160496	0.668725	0.174752		10.6	3	3	1.10635	1.02645	0.0113386	4.2265	3	6	2	2	0.72083	0.90482	-0.0434378	18.05	2	0	0	0	NaN	NaN		NaN	0
	125	Tb11.1790	Tb11.1790		retrotransposon hot spot protein (RHS, pseudogene), putative	64.461	11.3	0	16.199	1		0.964071	-0.0158912	0.669132	0.174488		9.7	5	1	0.991375	0.905879	-0.0429297	NaN	1	11.3	6	1	0.82229	1.026	0.0111474	NaN	1	8	4	0	NaN	NaN		NaN	0
	1718	Tb927.6.3420	Tb927.6.3420		hypothetical protein, conserved	39.505	17.2	0	28.546	1	1	0.987236	-0.00557921	0.669628	0.174167		17.2	6	6	1.04346	0.939673	-0.0270233	14.995	7	17.2	6	6	0.79439	1.0032	0.00138752	3.0859	6	11.2	3	3	0.69383	1.0207	0.00889811	149.34	3
	1361	Tb927.3.4260	Tb927.3.4260		hypothetical protein, conserved	41.306	10.3	0	22.75	1	1	0.929736	-0.0316403	0.671067	0.173234		6.2	1	1	0.770653	0.70205	-0.153632	NaN	1	6.2	1	1	0.81883	1.0387	0.0164901	NaN	1	10.3	2	2	0.765	1.1021	0.042221	2.8849	2
	282	Tb927.1.530	Tb927.1.530		hypothetical protein, conserved	30.748	8.4	0	4.217	1		0.920943	-0.0357673	0.672872	0.172067		4.4	1	1	1.15528	1.05557	0.023485	NaN	1	4	1	1	0.64478	0.80349	-0.0950195	NaN	1	0	0	0	NaN	NaN		NaN	0
	2269	Tb927.9.13580	Tb927.9.13580		hypothetical protein, conserved	48.929	8.3	0	18.952	1	1	0.968959	-0.0136946	0.673526	0.171645		8.3	3	3	0.959693	0.869263	-0.0608489	38.428	3	5.7	2	2	0.85121	1.0704	0.0295461	0.27369	2	3.1	1	1	0.67935	0.97773	-0.00978106	NaN	1
	1324	Tb927.3.2900	Tb927.3.2900		eukaryotic initiation factor 2a, putative	46.824	7.9	0	10.395	1		0.950893	-0.0218686	0.674446	0.171053		3.6	1	1	1.15089	1.06985	0.0293233	NaN	1	3.6	1	1	0.64417	0.78682	-0.104125	NaN	1	7.9	2	2	0.72124	1.0214	0.00919585	3.8618	2
	788	Tb927.11.12630	Tb927.11.12630		hypothetical protein, conserved	57.121	10.6	0	4.9792	1		0.920336	-0.0360538	0.674463	0.171042		6.8	2	2	1.14974	1.0544	0.0230037	41.316	2	10.6	3	3	0.63542	0.80332	-0.0951114	14.381	3	0	0	0	NaN	NaN		NaN	0
	1171	Tb927.11.9690	Tb927.11.9690		hypothetical protein, conserved	36.78	16.9	0	16.628	1		0.84289	-0.0742292	0.674829	0.170806		16.9	4	4	1.23501	1.11442	0.0470477	3.6001	4	8.3	2	2	0.54887	0.63752	-0.195506	15.121	2	0	0	0	NaN	NaN		NaN	0
	383	Tb927.10.13200;Tb11.v5.0897	Tb927.10.13200		hypothetical protein, conserved	102.15	5.4	0	5.8881	2	1	0.940747	-0.0265274	0.675691	0.170252		3.4	2	2	1.00704	0.914411	-0.0388585	22.135	2	5.4	3	3	0.94605	1.1629	0.0655424	9.8581	4	1.1	1	1	0.53712	0.78295	-0.106266	NaN	1
	1705	Tb927.6.2690	Tb927.6.2690		ubiquitin carboxyl-terminal hydrolase, putative,cysteine peptidase, Clan CA, family C19, putative	70.409	21.1	0	124.77	1		0.993428	-0.00286354	0.677536	0.169067		18.3	8	8	1.07533	0.988045	-0.00522341	5.1715	8	17.4	7	7	0.77224	0.97569	-0.0106881	10.582	6	12.7	5	5	0.71318	1.017	0.00732095	11.856	5
	402	Tb927.10.13850	Tb927.10.13850		hypothetical protein, conserved	43.008	41.1	0	101.76	1	1	0.981907	-0.00792972	0.677667	0.168984		31.1	11	11	1.12115	1.02831	0.0121236	15.749	13	40	15	15	0.80078	1.0018	0.000781027	13.971	18	40.8	14	14	0.63823	0.91898	-0.0366939	22.201	18
	425	Tb927.10.14710;Tb927.10.14600	Tb927.10.14710;Tb927.10.14600	RPS2;RPS2	40S ribosomal protein S2, putative (RPS2);40S ribosomal protein S2, putative (RPS2)	28.642	29.7	0	33.754	2		0.938345	-0.0276374	0.680883	0.166927		19.5	4	4	1.12603	1.02646	0.0113429	14.481	4	19.2	4	4	0.59471	0.74549	-0.127558	27.677	4	6.4	1	1	0.75597	1.0797	0.0333031	NaN	1
	1443	Tb927.4.2040;Tb927.4.2030	Tb927.4.2040;Tb927.4.2030	ALBA4;ALBA3	ALBA-Domain Protein (ALBA3);ALBA-Domain Protein (ALBA4)	20.808	25.3	0	52.246	2		0.997344	-0.00115503	0.682496	0.1659		24.7	3	3	1.08981	0.988631	-0.00496586	23.553	4	25.3	4	4	0.80136	1.0051	0.00220927	3.6793	6	19.5	3	3	0.69006	0.99837	-0.000708478	91.071	4
	2250	Tb927.9.12730	Tb927.9.12730		chaperone protein DNAj, putative	48.592	35.5	0	84.279	1	1	0.990941	-0.003952	0.68285	0.165675		32.2	10	10	1.05869	0.960799	-0.0173673	12.331	10	26.4	9	9	0.77533	0.99692	-0.00133969	7.5518	10	24.6	8	8	0.70172	1.0159	0.00685096	7.3363	8
	2000	Tb927.8.1150	Tb927.8.1150	kkt9	hypothetical protein, conserved	39.248	11.7	0	16.032	1		0.755427	-0.121808	0.683023	0.165565		7.9	2	2	0.307361	0.279853	-0.553069	176.43	2	7.9	2	2	0.859	1.0662	0.0278387	15.618	2	11.7	3	3	1.0102	1.4448	0.159808	56.953	4
	1628	Tb927.5.3980	Tb927.5.3980		hypothetical protein, conserved	43.71	23.3	0	35.793	1	1	0.991827	-0.00356411	0.683233	0.165431		18.4	6	6	1.08011	0.989217	-0.00470821	12.168	6	20.3	6	6	0.81291	1.0187	0.00804631	11.726	6	20.3	6	6	0.66797	0.96821	-0.0140304	20.302	6
	1141	Tb927.11.8950	Tb927.11.8950	TbLRRP1	leucine rich repeat (TbLRRP1)	78.96	4.8	0	6.6223	1		0.832579	-0.0795743	0.683389	0.165332		1.7	1	1	1.50042	1.39618	0.144941	NaN	1	3.1	2	2	0.34456	0.4524	-0.344477	NaN	1	3.1	2	2	0.63746	0.91372	-0.0391869	11.734	2
	1850	Tb927.7.2720	Tb927.7.2720		hypothetical protein, conserved	74.108	17.2	0	69.687	1		0.952962	-0.0209243	0.683766	0.165092		13.9	6	6	1.22814	1.11203	0.0461146	9.973	7	17.2	7	7	0.75773	0.94285	-0.0255574	8.9912	9	17.2	7	7	0.56722	0.82541	-0.0833303	17.117	8
	2041	Tb927.8.2550	Tb927.8.2550	PRI1	mitochondrial DNA primase (PRI1)	69.862	7.9	0	13.287	1	1	0.919872	-0.0362725	0.684293	0.164758		5.2	2	2	0.762137	0.691563	-0.160168	NaN	1	5.2	2	2	0.78497	0.98496	-0.00658141	21.04	2	5.4	2	2	0.7656	1.1427	0.0579322	27.325	2
	1409	Tb927.3.860	Tb927.3.860	ACP	acyl carrier protein,acyl carrier protein, mitochondrial precursor, putative (ACP)	16.531	21.6	0	63.104	1	1	0.982778	-0.00754453	0.685002	0.164308		21.6	3	3	1.13113	1.03001	0.0128435	2.2895	5	21.6	2	2	0.7422	0.92728	-0.0327891	6.6808	4	21.6	2	2	0.68413	0.99383	-0.0026879	3.4479	4
	429	Tb927.10.14790	Tb927.10.14790		aminopeptidase, putative,metallo-peptidase, Clan MG, Family M24	42.69	9.9	0	5.9061	1		0.962845	-0.0164437	0.686362	0.163447		5.5	1	1	1.12892	1.01943	0.00835741	NaN	1	0	0	0	NaN	NaN		NaN	0	9.9	2	2	0.62952	0.9094	-0.0412451	10.038	2
	2372	Tb927.9.5900	Tb927.9.5900	GDH	glutamate dehydrogenase (GDH)	112.11	65.4	0	323.31	1	1	0.993512	-0.00282698	0.686615	0.163287		63.9	54	54	1.10195	1.01516	0.00653279	18.514	95	63.9	52	52	0.78551	0.98943	-0.00461493	9.527	96	60.9	49	49	0.67974	0.97634	-0.0103989	12.584	93
	1659	Tb927.6.1250;Tb11.v5.0743	Tb927.6.1250;Tb11.v5.0743		hypothetical protein, conserved;hypothetical protein, conserved	56.918	7.8	0	6.2019	2	1	0.939906	-0.0269157	0.686868	0.163127		7.8	4	4	1.24785	1.16175	0.0651131	13.165	2	3.6	2	2	0.64408	0.81021	-0.0914024	14.854	2	4.2	2	2	0.61288	0.88215	-0.0544576	13.383	2
	892	Tb927.11.16100	Tb927.11.16100		ubiquitin carboxyl-terminal hydrolase, putative	131.25	5.9	0	19.468	1		0.920803	-0.0358334	0.687104	0.162977		3.9	3	3	0.834864	0.764701	-0.116508	19.833	3	3.4	3	3	0.98235	1.2242	0.0878524	62.35	3	2.5	2	2	0.57793	0.83398	-0.0788444	6.7126	2
	529	Tb927.10.3650	Tb927.10.3650		NADH-dependent fumarate reductase, putative	133.53	28.9	0	250.35	1	1	0.985996	-0.00612475	0.690188	0.161033		21.1	23	19	1.1113	1.03066	0.0131163	14.27	21	24.4	24	21	0.7567	0.94807	-0.0231596	31.324	19	19.2	17	14	0.67641	0.981	-0.00833099	5.4887	14
	1204	Tb927.2.2590	Tb927.2.2590		hypothetical protein, conserved	12.316	14.3	0.00097135	3.7607	1	1	0.899601	-0.0459499	0.69075	0.160679		14.3	1	1	1.11158	1.05032	0.021322	NaN	1	14.3	1	1	0.71758	0.77051	-0.113222	NaN	1	0	0	0	NaN	NaN		NaN	0
	373	Tb927.10.12910;Tb11.v5.0593	Tb927.10.12910;Tb11.v5.0593		hypothetical protein, conserved;hypothetical protein, conserved	103.97	22.1	0	88.894	2	1	0.987456	-0.00548236	0.691968	0.159914		15.8	12	12	1.03519	0.948047	-0.0231701	27.161	12	19.3	14	14	0.79218	0.99598	-0.00174938	21.265	14	11.9	8	8	0.69405	1.0197	0.00847242	13.172	8
	493	Tb927.10.2530	Tb927.10.2530		adenylate kinase, putative	24.941	47.7	0	47.878	1	1	0.988884	-0.0048546	0.693161	0.159166		43.7	10	10	1.07853	0.983962	-0.00702189	22.368	13	43.7	9	9	0.81339	1.024	0.0103	13.842	13	39.6	8	8	0.66408	0.95975	-0.0178419	8.0784	11
	492	Tb927.10.2510;Tb11.v5.0623	Tb927.10.2510;Tb11.v5.0623		hypothetical protein, conserved;hypothetical protein, conserved	58.018	8	0	9.6797	2		0.947647	-0.0233535	0.694236	0.158493		5.5	2	2	0.936505	0.877501	-0.0567525	13.181	2	5.1	2	2	0.82607	1.0234	0.0100454	7.6473	2	0	0	0	NaN	NaN		NaN	0
	1829	Tb927.7.2110	Tb927.7.2110	kkt11	hypothetical protein, conserved	29.286	29.9	0	57.728	1		0.974531	-0.0112044	0.694551	0.158296		24.3	5	5	1.13903	1.04407	0.0187296	9.1473	5	29.9	6	6	0.79224	0.98494	-0.00659022	7.8656	8	9.2	2	2	0.61752	0.90001	-0.0457527	26.021	2
	1220	Tb927.2.3920	Tb927.2.3920		hypothetical protein, conserved	18.392	23	0	5.7582	1	1	0.914673	-0.0387341	0.695629	0.157623		23	3	3	1.11938	1.03788	0.0161484	NaN	1	11.8	2	2	0.6398	0.80609	-0.0936165	NaN	1	0	0	0	NaN	NaN		NaN	0
	1262	Tb927.3.1120	Tb927.3.1120	rtb2	GTP-binding nuclear protein rtb2, putative (rtb2)	24.406	73.3	0	159.63	1		0.976682	-0.0102468	0.696355	0.157169		63.6	11	11	1.13213	1.04478	0.0190244	7.4232	12	72.8	15	15	0.72653	0.91253	-0.0397528	27.045	16	64.1	11	11	0.68299	0.97721	-0.0100121	14.123	11
	285	Tb927.1.730	Tb927.1.730		hypothetical protein, conserved	62.84	14.2	0	14.617	1	1	0.938232	-0.0276899	0.698177	0.156035		10.2	4	4	0.878272	0.767283	-0.115044	47.522	5	6.5	3	3	0.78729	0.98816	-0.00517273	20.038	3	2.5	1	1	0.7402	1.0893	0.0371475	NaN	1
	1085	Tb927.11.6440	Tb927.11.6440		hypothetical protein, conserved	48.841	15.2	0	21.096	1		0.981829	-0.00796395	0.698625	0.155756		8.2	3	3	1.07304	0.987654	-0.00539504	3.135	3	9.5	3	3	0.74034	0.92967	-0.0316712	14.286	3	11.1	4	4	0.71257	1.0308	0.0131744	34.753	4
	1887	Tb927.7.3880	Tb927.7.3880		protein kinase, putative	87.072	5.2	0	5.5477	1		0.871739	-0.0596134	0.698938	0.155561		0.9	1	1	0.971062	0.901063	-0.0452447	NaN	1	5.2	3	3	1.0073	1.2621	0.101094	17.826	3	2.2	1	1	0.41047	0.58252	-0.234689	NaN	1
	701	Tb927.10.9910	Tb927.10.9910		hypothetical protein, conserved	48.986	18	0	53.946	1		0.956802	-0.0191777	0.699905	0.154961		14.7	4	4	0.934318	0.844167	-0.0735717	13.1	4	18	5	5	0.86004	1.0817	0.0341068	5.0847	5	14.7	4	4	0.66003	0.95925	-0.0180682	19.684	4
	1613	Tb927.5.3560	Tb927.5.3560	VAMP	vesicle-associated membrane protein, putative,synaptobrevin, putative (VAMP)	24.402	16.2	0	11.365	1		0.892255	-0.0495109	0.700164	0.1548		16.2	2	2	0.736052	0.676178	-0.169939	29.637	2	16.2	2	2	0.65935	0.83006	-0.0808905	49.98	2	6.5	1	1	0.86885	1.2656	0.102296	NaN	1
	484	Tb927.10.230	Tb927.10.230		proteasome alpha 5 subunit, putative,20S proteasome subunit alpha 5	27.176	4.5	0	4.3872	1		0.899589	-0.0459557	0.700786	0.154414		4.5	1	1	1.14245	1.03985	0.0169694	NaN	1	0	0	0	NaN	NaN		NaN	0	4.5	1	1	0.53653	0.77825	-0.108881	NaN	1
	1228	Tb927.2.4230;Tb11.v5.0827	Tb927.2.4230		NUP-1 protein, putative	406.9	32.6	0	268.65	2		0.981186	-0.00824883	0.701793	0.153791		27.2	14	14	1.13456	1.04263	0.0181315	18.414	19	29.6	10	10	0.76379	0.95538	-0.0198239	9.4415	12	22.3	11	11	0.63976	0.9483	-0.0230542	12.037	13
	1637	Tb927.5.520	Tb927.5.520		stomatin-like protein, putative	55.979	39.7	0	323.31	1	1	0.993338	-0.00290288	0.701988	0.15367		37.7	18	18	1.1	1.01449	0.00624649	11.072	25	35.8	16	16	0.78782	0.98616	-0.00605262	6.2181	25	39.5	18	18	0.67787	0.97971	-0.00890246	19.107	25
	1711	Tb927.6.2990	Tb927.6.2990		hypothetical protein, conserved	36.759	5.1	0.0035445	2.4543	1		0.802302	-0.0956621	0.70222	0.153527		5.1	2	2	1.18662	1.08167	0.0340932	NaN	1	2.7	1	1	0.48218	0.59509	-0.225417	NaN	1	0	0	0	NaN	NaN		NaN	0
	909	Tb927.11.16660	Tb927.11.16660		hypothetical protein, conserved	234.41	10.3	0	99.578	1		0.979219	-0.00912033	0.702526	0.153338		7.1	10	10	1.14331	1.04583	0.0194603	13.568	11	8	12	12	0.7641	0.95806	-0.0186073	16.997	13	6	9	9	0.6499	0.9371	-0.0282141	24.591	9
	759	Tb927.11.11520	Tb927.11.11520	PEX11	glycosomal membrane protein (PEX11)	24.027	44	0	79.419	1		0.987995	-0.00524537	0.702777	0.153182		44	9	9	1.11146	1.02125	0.00913292	6.1338	11	39	8	8	0.7951	0.98845	-0.00504529	7.5632	10	40.8	7	7	0.66353	0.95538	-0.0198239	4.4258	9
	1328	Tb927.3.3130	Tb927.3.3130		hypothetical protein, conserved	178.08	28.7	0	311.45	1		0.98686	-0.00574449	0.703088	0.15299		22.3	29	29	1.09048	0.996115	-0.00169048	11.242	32	22.3	29	29	0.79919	1.0178	0.00766245	19.285	35	15.8	16	16	0.65446	0.94797	-0.0232054	13.238	18
	1889	Tb927.7.3910	Tb927.7.3910		hypothetical protein, conserved	57.602	14.7	0	22.118	1	1	0.966865	-0.0146342	0.703488	0.152743		14.7	6	6	1.10937	1.02016	0.00866744	21.83	6	14.7	6	6	0.80939	1.0198	0.00851501	11.895	6	6	2	2	0.60354	0.86879	-0.0610852	4.0822	3
	1264	Tb927.3.1200	Tb927.3.1200		hypothetical protein, conserved	83.763	25.6	0	101.08	1		0.987242	-0.00557618	0.704461	0.152143		17.9	10	10	1.04027	0.948857	-0.0227994	13.871	11	23.4	12	12	0.80381	1.0143	0.00616643	13.101	13	20.7	11	11	0.6942	0.99978	-9.55553e-05	17.026	13
	238	Tb927.1.1210	Tb927.1.1210		hypothetical protein, conserved	16.902	21.5	0	11.804	1	1	0.941985	-0.0259562	0.705505	0.1515		21.5	3	3	0.900982	0.798339	-0.0978124	15.38	3	19.4	2	2	0.74158	0.94802	-0.0231825	15.078	2	7.6	1	1	0.74918	1.1044	0.0431264	NaN	1
	1767	Tb927.6.4670	Tb927.6.4670	TbMORN1	MORN repeat-containing protein (TbMORN1)	40.686	79.3	0	304.45	1		0.988665	-0.00495092	0.705534	0.151482		70.9	29	29	1.11269	1.02001	0.00860571	11.587	37	73.5	28	28	0.78417	0.98816	-0.00517273	13.644	39	62	23	23	0.66814	0.95877	-0.0182856	14.713	30
	2245	Tb927.9.12510	Tb927.9.12510	DED1	ATP-dependent DEAD/H RNA helicase, putative (DED1)	82.74	25.2	0	59.946	1	1	0.966348	-0.0148665	0.705656	0.151407		16.9	9	8	1.12233	1.00179	0.000777993	3.0488	9	22.3	13	12	0.82108	1.0359	0.0153178	9.6306	14	18.1	10	9	0.59608	0.86957	-0.0606955	2.1344	10
	2211	Tb927.9.10570	Tb927.9.10570		predicted zinc finger protein	37.875	5.6	0	11.197	1		0.984071	-0.00697367	0.705756	0.151345		5.6	1	1	1.10307	1.00524	0.00226847	NaN	1	0	0	0	NaN	NaN		NaN	0	5.6	1	1	0.6635	0.96335	-0.0162159	NaN	1
	997	Tb927.11.3900	Tb927.11.3900		glycosyltransferase family-like protein, putative	31.198	32.7	0	47.825	1	1	0.971592	-0.012516	0.705814	0.15131		28.4	7	7	1.15496	1.0594	0.0250604	7.8601	8	28	7	7	0.73587	0.95133	-0.0216688	8.9449	10	29.1	8	8	0.63909	0.91004	-0.0409395	8.8372	8
	310	Tb927.10.1070;Tb927.7.7360	Tb927.10.1070	CRK1;CRK2	cell division protein kinase 2 homolog 1,cdc2- like protein kinase (CRK1)	34.35	32.9	0	40.535	2		0.994542	-0.00237696	0.70582	0.151306		32.6	9	9	1.06404	0.979144	-0.0091533	9.413	8	32.9	10	10	0.79512	1.0085	0.0036759	8.8439	10	22.9	6	6	0.69211	0.9962	-0.00165346	5.0099	6
	783	Tb927.11.12390	Tb927.11.12390		hypothetical protein, conserved	125.23	4	0	10.818	1		0.895654	-0.0478599	0.706249	0.151042		2.8	2	2	1.18159	1.08738	0.0363821	16.621	2	1.2	1	1	0.84313	1.0398	0.0169498	NaN	1	2.5	2	2	0.48364	0.63546	-0.196912	12.166	2
	2400	Tb927.9.7540	Tb927.9.7540		calpain-like cysteine peptidase, putative,cysteine peptidase, Clan CA, family C2, putative	95.448	25.2	0	114.18	1		0.971598	-0.0125134	0.706945	0.150615		20.1	12	12	1.09028	0.971251	-0.0126685	6.5585	12	23.1	13	13	0.84011	1.0502	0.021272	13.718	12	11.6	7	7	0.62451	0.8992	-0.0461437	8.047	6
	1875	Tb927.7.3430	Tb927.7.3430	PPIase	cyclophilin-type peptidyl-prolyl cis-trans isomerase, putative (PPIase)	25.548	46.8	0	67.838	1	1	0.992065	-0.00345998	0.707029	0.150562		46.8	8	8	1.05509	0.96965	-0.013385	6.1708	8	42.9	7	7	0.79145	0.9952	-0.00208963	4.4646	8	38.1	6	6	0.69512	1.0118	0.00509468	15.374	7
	1364	Tb927.3.4390	Tb927.3.4390	GCVL-1	dihydrolipoamide dehydrogenase, putative (GCVL-1)	55.839	50.7	0	232.95	1	1	0.99456	-0.00236895	0.707081	0.150531		47.1	19	19	1.09565	1.00926	0.00400091	7.9176	26	49.1	20	20	0.78361	0.98005	-0.00875177	8.7656	26	44.4	17	17	0.68319	0.99459	-0.00235591	7.5144	24
	2322	Tb927.9.2730	Tb927.9.2730		hypothetical protein, conserved	147.24	4.9	0	20.203	1		0.946407	-0.0239219	0.707377	0.150349		2.8	3	3	1.23327	1.12181	0.0499178	35.012	3	3	3	3	0.70427	0.88241	-0.0543296	34.007	3	2.8	3	3	0.59302	0.85634	-0.0673538	4.8179	4
	1577	Tb927.5.2150	Tb927.5.2150		hypothetical protein, conserved	60.078	9.3	0	16.761	1	1	0.909259	-0.0413123	0.708205	0.149841		6	2	2	0.74744	0.683107	-0.165511	61.929	2	3.2	2	2	0.79636	0.98989	-0.00441306	24.573	2	1.3	1	1	0.78683	1.1117	0.0459876	NaN	1
	459	Tb927.10.16120	Tb927.10.16120		inosine-5-monophosphate dehydrogenase,IMP dehydrogenase	48.481	44.7	0	151.56	1		0.979926	-0.00880667	0.70829	0.149789		44.7	15	15	1.01776	0.921914	-0.0353096	10.333	20	36.9	13	13	0.79399	0.99822	-0.000773733	17.624	17	35.1	12	12	0.70342	1.0225	0.00966332	15.491	17
	100	Tb927.5.4420;Tb05.5K5.70	Tb927.5.4420;Tb05.5K5.70		nucleolar RNA helicase II, putative,nucleolar RNA helicase Gu, putative;nucleolar RNA helicase II, putative,nucleolar RNA helicase Gu, putative,BAC from homologous region on chr5	68.786	14.2	0	50.905	2		0.956194	-0.0194538	0.708564	0.149621		10.6	5	5	1.16911	1.0744	0.0311668	17.116	5	10.8	4	4	0.76757	0.9617	-0.0169604	20.667	6	9	4	4	0.58287	0.84612	-0.072568	24.698	4
	1310	Tb927.3.2370	Tb927.3.2370		hypothetical protein, conserved	15.403	32.8	0	11.243	1	1	0.89313	-0.0490852	0.708604	0.149596		32.8	2	2	1.39774	1.26062	0.100585	5.2453	2	32.8	2	2	0.62047	0.78476	-0.105263	2.7742	2	32.8	2	2	0.49231	0.72015	-0.142577	16.712	2
	251	Tb927.1.2190	Tb927.1.2190		hypothetical protein, conserved	188	4.2	0	18.482	1		0.929208	-0.031887	0.708849	0.149446		3.4	4	4	0.830151	0.763417	-0.117238	15.643	3	1.9	2	2	0.90663	1.1289	0.0526555	6.4394	3	3.4	4	4	0.64503	0.93094	-0.0310783	22.113	4
	2030	Tb927.8.2000	Tb927.8.2000	NCP1	cyclophilin, putative (NCP1)	28.482	9.5	0.0023084	2.9061	1		0.904722	-0.0434849	0.708937	0.149392		5	1	1	NaN	NaN		NaN	0	4.6	1	1	0.62663	0.79445	-0.0999334	NaN	1	4.6	1	1	0.71845	1.0303	0.0129637	NaN	1
	1633	Tb927.5.4120	Tb927.5.4120		hypothetical protein, conserved	22.32	28.3	0	17.728	1	1	0.972308	-0.012196	0.709387	0.149117		28.3	5	5	1.08941	1.00047	0.00020407	4.5107	5	19.4	4	4	0.74383	0.8934	-0.0489541	17.776	3	8.9	2	2	0.71142	1.0284	0.0121621	4.6573	2
	1260	Tb927.3.1030	Tb927.3.1030	RPB28	RNA-binding protein (RPB28)	39.272	7.8	0	5.9567	1		0.910253	-0.040838	0.71044	0.148472		4.2	1	1	1.27471	1.17576	0.0703205	NaN	1	7.8	2	2	0.71594	0.89556	-0.0479053	7.2397	2	3.6	1	1	0.4949	0.71626	-0.144929	NaN	1
	284	Tb927.1.720;Tb927.1.710;Tb927.1.700	Tb927.1.720	PGKC;PGKB;PGKA	phosphoglycerate kinase (PGKA)	55.747	11.8	0	29.216	3		0.966032	-0.0150085	0.710822	0.148239		8.3	3	3	1.179	1.07164	0.0300485	11.847	3	11.8	4	4	0.71619	0.93066	-0.031209	15.466	4	11.8	4	4	0.61479	0.90393	-0.0438652	9.0491	4
	1222	Tb927.2.4000	Tb927.2.4000		hypothetical protein, conserved	97.393	5.9	0	32.05	1	1	0.970318	-0.0130858	0.710847	0.148224		5.9	4	4	1.0141	0.925241	-0.0337454	18.342	4	2.2	2	2	0.74204	0.92852	-0.0322087	9.085	2	1.3	1	1	0.73994	1.0634	0.0266967	NaN	1
	1450	Tb927.4.2220	Tb927.4.2220		TPR-repeat-containing chaperone protein DNAJ, putative	80.445	22.3	0	81.905	1		0.976024	-0.0105395	0.711149	0.14804		15.3	9	9	1.12628	1.02699	0.0115658	11.797	10	19.4	11	11	0.72035	0.90861	-0.0416225	21.672	11	13.2	8	8	0.69046	0.99641	-0.00156192	52.296	8
	881	Tb927.11.15820	Tb927.11.15820		superoxide dismutase, putative	36.047	20.1	0	74.177	1	1	0.897444	-0.0469927	0.713836	0.146402		16.2	3	3	1.33592	1.21118	0.0832094	16.781	5	20.1	4	4	0.55218	0.69544	-0.15774	83.032	7	15.5	3	3	0.5979	0.85813	-0.0664469	9.6687	5
	451	Tb927.10.15550	Tb927.10.15550		hypothetical protein, conserved	130.03	6.1	0	24.364	1		0.890598	-0.0503182	0.71387	0.146381		6.1	5	5	0.707014	0.63004	-0.200632	75.451	6	4.5	4	4	0.83956	1.0497	0.0210652	1.8574	6	3.1	3	3	0.73779	1.0681	0.0286119	9.5802	3
	2085	Tb927.8.4230	Tb927.8.4230		hypothetical protein, conserved	119.02	12.8	0	55.961	1	1	0.945951	-0.0241316	0.715519	0.145379		5	3	3	1.22568	1.11504	0.0472901	17.399	3	9.8	5	5	0.69631	0.86833	-0.0613152	17.553	5	9.2	4	4	0.69278	0.87424	-0.0583693	9.6281	5
	984	Tb927.11.3490	Tb927.11.3490		hypothetical protein, conserved	87.8	37	0	200.07	1		0.98697	-0.00569617	0.716474	0.1448		32.6	18	18	1.14193	1.02583	0.0110754	13.906	18	32.8	19	19	0.77207	0.96833	-0.0139766	9.8903	18	21.9	12	12	0.67291	0.96786	-0.0141875	9.9322	13
	1928	Tb927.7.5330	Tb927.7.5330		hypothetical protein, conserved	82.999	24.9	0	139.15	1		0.983806	-0.00709052	0.717499	0.144179		19.3	9	9	1.03971	0.943663	-0.0251829	11.597	8	21.4	9	9	0.81301	1.0251	0.0107662	11.401	9	16.2	7	7	0.67717	0.98434	-0.00685487	14.351	7
	1388	Tb927.3.5310	Tb927.3.5310		paraflagellar rod protein	242.78	25	0	22.032	1		0.964749	-0.0155857	0.717757	0.144023		25	3	3	0.975515	0.910001	-0.0409582	15.644	3	14.8	2	2	0.8586	1.0712	0.0298706	38.993	2	14	1	1	0.64402	0.92115	-0.0356696	NaN	1
	1410	Tb927.3.910	Tb927.3.910		gamma-tubulin,tubulin gamma chain	50.119	31.3	0	71.807	1		0.975757	-0.0106581	0.71848	0.143585		23	7	7	1.02494	0.940203	-0.0267783	23.658	6	27.5	8	8	0.82144	1.048	0.0203613	29.676	8	19.9	6	6	0.65037	0.94285	-0.0255574	21.949	6
	1281	Tb927.3.1680	Tb927.3.1680		hypothetical protein, conserved	35.191	11.6	0.0014306	3.4075	1		0.836535	-0.0775157	0.719006	0.143267		4.1	1	1	0.752332	0.673265	-0.171814	NaN	1	11.6	3	3	0.82968	1.0394	0.0167827	18.556	3	0	0	0	NaN	NaN		NaN	0
	179	Tb927.10.15470;Tb11.v5.0507	Tb927.10.15470;Tb11.v5.0507		hypothetical protein, conserved;hypothetical protein, conserved	54.397	15.6	0	29.816	2		0.661824	-0.179258	0.71901	0.143265		6	2	2	0.223115	0.20063	-0.697604	210.69	2	13.7	4	4	1.0119	1.3146	0.118794	15.607	5	7.3	2	2	0.75257	1.0991	0.0410372	12.87	2
	2252	Tb927.9.12770	Tb927.9.12770		hypothetical protein, conserved	116.54	9.7	0	44.642	1	1	0.957728	-0.0187576	0.719386	0.143038		3.9	4	4	1.05875	0.966744	-0.0146885	13.273	4	5.9	5	5	0.85737	1.062	0.0261245	16.261	6	5.7	3	3	0.58733	0.85564	-0.0677089	34.907	3
	1748	Tb927.6.4230	Tb927.6.4230		hypothetical protein, conserved	55.213	20.4	0	119.3	1		0.984099	-0.00696126	0.719966	0.142688		14.8	7	7	1.09606	0.984737	-0.00667992	60.926	9	18.6	8	8	0.83512	1.024	0.0103	34.008	11	15.6	5	5	0.65288	0.94514	-0.0245039	41.954	8
	455	Tb927.10.15720	Tb927.10.15720	RPN9	proteasome regulatory non-ATP-ase subunit 9,19S proteasome regulatory subunit (RPN9)	45.989	8.6	0	7.8616	1		0.944858	-0.0246335	0.720256	0.142513		4.2	1	1	1.22375	1.10511	0.0434043	NaN	1	8.6	3	3	0.73865	0.90973	-0.0410875	7.7586	4	4.2	1	1	0.58146	0.83904	-0.0762173	3.2854	2
	343	Tb927.10.11760	Tb927.10.11760	PUF6	pumilio/PUF RNA binding protein 6 (PUF6)	93.062	13.2	0	36.595	1		0.96507	-0.0154411	0.720355	0.142453		11	6	6	1.15635	1.05243	0.022194	6.7418	6	9.5	5	5	0.77677	0.96888	-0.01373	7.0139	4	9.8	5	5	0.6103	0.88148	-0.0547875	10.49	5
	2273	Tb927.9.13780	Tb927.9.13780		hypothetical protein, conserved	33.466	7.5	0.0023105	2.9137	1	1	0.896911	-0.0472505	0.721257	0.14191		0	0	0	NaN	NaN		NaN	0	7.5	2	2	0.82257	1.0219	0.0094084	43.746	2	4.1	1	1	0.54031	0.78721	-0.103909	NaN	1
	716	Tb927.11.1020	Tb927.11.1020		ribokinase, putative	35.288	49.2	0	323.31	1		0.995078	-0.00214298	0.723868	0.140341		47.7	12	12	1.09798	1.00831	0.00359321	36.462	23	49.2	13	13	0.78904	0.98473	-0.00668283	13.481	23	47.7	11	11	0.69883	0.99234	-0.0033395	5.2287	18
	1819	Tb927.7.1670	Tb927.7.1670	eif4e6	hypothetical protein, conserved	20.864	22	0	8.3239	1		0.945955	-0.0241297	0.723979	0.140274		14.5	2	2	1.186	1.03347	0.0142996	10.523	3	7	1	1	0.75345	0.80902	-0.0920407	NaN	1	7.5	1	1	0.66377	1.0124	0.00535214	0.60828	2
	137	Tb11.v5.0195;Tb927.10.6010	Tb11.v5.0195;Tb927.10.6010		hypothetical protein, conserved;hypothetical protein, conserved	115.4	7.3	0	22.307	2		0.964925	-0.0155065	0.72492	0.13971		3.5	3	3	1.16106	1.06628	0.0278713	13.34	4	7.3	6	6	0.75362	0.92479	-0.0339569	19.561	7	1.4	1	1	0.62357	0.9111	-0.040434	2.8925	2
	999	Tb927.11.3940	Tb927.11.3940		hypothetical protein, conserved	36.265	20.2	0	12.046	1	1	0.96271	-0.0165046	0.725447	0.139394		20.2	6	6	0.971534	0.866476	-0.0622434	13.408	6	20.2	6	6	0.79717	1.0016	0.000694316	15.823	5	14.6	4	4	0.70432	1.0281	0.0120354	9.6326	4
	902	Tb927.11.16480	Tb927.11.16480		enoyl-CoA hydratase/isomerase family protein, putative	40.234	46.7	0	89.154	1	1	0.991516	-0.00370034	0.725922	0.13911		37	12	12	1.10759	1.01422	0.00613174	13.841	15	37.6	12	12	0.77578	0.97417	-0.0113652	7.999	16	36.5	9	9	0.67549	0.98658	-0.00586769	6.2084	12
	1217	Tb927.2.3780	Tb927.2.3780		translation initiation factor IF-2, putative	94.472	8.4	0	7.9055	1		0.931224	-0.0309458	0.726394	0.138828		6.1	3	3	1.2539	1.11298	0.0464866	14.86	2	1.3	1	1	0.63874	0.78991	-0.102422	NaN	1	7.1	3	3	0.64858	0.91854	-0.0369019	4.1738	2
	1382	Tb927.3.5050	Tb927.3.5050		60S ribosomal protein L4	41.856	18.4	0	38.628	1		0.943972	-0.025041	0.727019	0.138454		8.3	3	3	1.21026	1.08987	0.0373751	30.955	3	7.5	2	2	0.65549	0.82659	-0.0827099	NaN	1	11.2	2	2	0.64372	0.93371	-0.029788	13.134	2
	786	Tb927.11.12540	Tb927.11.12540		leucine-rich repeat protein (LRRP), putative	115.21	24.2	0	77.092	1		0.970368	-0.0130635	0.727067	0.138426		21.4	17	17	1.14911	1.04862	0.0206202	22.623	17	17.7	14	14	0.73049	0.90888	-0.0414935	24.642	16	9.2	7	7	0.66588	0.9587	-0.0183173	12.634	8
	2253	Tb927.9.12780	Tb927.9.12780		hypothetical protein, conserved	121.18	5.6	0	13.984	1		0.937766	-0.0279054	0.727404	0.138224		2.2	2	2	0.878657	0.792644	-0.100922	28.46	2	5.6	5	5	0.86488	1.0728	0.0305188	15.826	5	3	3	3	0.6753	0.96981	-0.0133133	12.478	2
	2128	Tb927.8.6060	Tb927.8.6060		2-amino-3-ketobutyrate coenzyme A ligase, putative,glycine acetyltransferase, putative	43.734	50.5	0	279.13	1		0.993659	-0.00276247	0.72747	0.138185		44.8	13	13	1.08875	0.98668	-0.00582372	5.5924	18	44.8	13	13	0.7777	0.98333	-0.00730071	10.201	20	41.6	12	12	0.69949	1.0112	0.00483706	6.0583	13
	1206	Tb927.2.2880	Tb927.2.2880		hypothetical protein, conserved	47.462	7.2	0.0027003	2.5858	1		0.87973	-0.0556508	0.727716	0.138038		4.9	1	1	1.29421	1.2079	0.0820324	NaN	1	7.2	2	2	0.68765	0.8609	-0.0650473	12.894	2	2.3	1	1	0.43365	0.65473	-0.183938	NaN	1
	2022	Tb927.8.1860	Tb927.8.1860		pitrilysin-like metalloprotease,metallo-peptidase, Clan ME, Family M16C	114.53	57.6	0	323.31	1	1	0.9943	-0.00248255	0.728505	0.137567		55	50	50	1.0983	1.00869	0.00375556	7.8574	73	50.5	46	46	0.78781	0.99269	-0.00318635	12.314	68	50.1	46	46	0.68216	0.98171	-0.00801679	10.171	73
	2040	Tb927.8.2540	Tb927.8.2540		3-ketoacyl-CoA thiolase, putative	46.244	56.6	0	323.31	1	1	0.993608	-0.002785	0.729098	0.137214		47.3	16	16	1.07459	0.986875	-0.00573803	14.051	25	47.3	15	15	0.80808	1.0111	0.00479411	7.7698	26	50.9	15	15	0.67344	0.98308	-0.00741114	11.5	26
	2031	Tb927.8.2020	Tb927.8.2020		agmatinase, putative	36.517	34.7	0	47.099	1	1	0.954486	-0.0202306	0.729177	0.137167		22.4	4	4	0.948587	0.866251	-0.0623563	33.723	4	26	6	6	0.7446	0.93233	-0.0304303	9.3124	6	12.7	4	4	0.74839	1.0767	0.0320947	20.6	4
	1731	Tb927.6.3810	Tb927.6.3810		hypothetical protein, conserved	56.887	12.7	0	10.716	1		0.860684	-0.0651564	0.730048	0.136648		8.4	3	3	0.626174	0.574185	-0.240948	13.367	3	5.9	2	2	0.87708	1.1115	0.0459095	NaN	1	9	3	3	0.6945	0.99901	-0.000430165	3.3843	3
	2121	Tb927.8.5760	Tb927.8.5760		hypothetical protein, conserved	53.809	15.1	0	21.134	1		0.983182	-0.00736628	0.730453	0.136408		11.7	4	4	1.10038	1.00222	0.000965232	39.346	5	10.3	5	5	0.76046	0.9645	-0.0156978	25.054	4	0	0	0	NaN	NaN		NaN	0
	869	Tb927.11.1540	Tb927.11.1540		isovaleryl-coA dehydrogenase, putative	44.799	14.8	0	14.083	1	1	0.985358	-0.00640591	0.730731	0.136242		11.4	5	5	1.0806	0.987362	-0.00552368	13.637	4	12.9	5	5	0.80771	1.0191	0.0082168	26.039	5	9	3	3	0.66007	0.9508	-0.0219108	20.521	3
	1683	Tb927.6.2160	Tb927.6.2160		hypothetical protein, conserved	33.183	40.3	0	149.52	1		0.971518	-0.0125492	0.731039	0.136059		40.3	10	10	0.990295	0.900414	-0.0455577	17.091	12	31.2	8	8	0.81743	1.0262	0.011232	6.2809	11	40.3	10	10	0.69212	0.99238	-0.003322	6.7987	13
	1485	Tb927.4.3690	Tb927.4.3690		hypothetical protein, conserved	48.527	29.2	0	129.59	1	1	0.97807	-0.00963009	0.731238	0.135942		29.2	9	9	1.09784	0.995421	-0.0019932	15.371	11	28.9	8	8	0.80782	1.019	0.00817418	14.383	10	24.4	7	7	0.64967	0.92242	-0.0350713	15.308	8
	2306	Tb927.9.1650	Tb927.9.1650		hypothetical protein, conserved	40.422	5.2	0.0060293	2.1966	1	1	0.356908	-0.447444	0.73182	0.135596		0	0	0	NaN	NaN		NaN	0	2.7	1	1	0.089043	0.11242	-0.949156	NaN	1	2.5	1	1	0.77412	1.1331	0.0542682	NaN	1
	1474	Tb927.4.3410	Tb927.4.3410		selenoprotein, putative	85.794	6	0	32.886	1		0.960049	-0.0177068	0.732525	0.135178		4	2	2	1.06823	0.984446	-0.00680819	10.895	2	6	3	3	0.83036	1.04	0.0170333	8.4448	3	3.5	2	2	0.58712	0.86428	-0.0633455	15.426	2
	1277	Tb927.3.1590	Tb927.3.1590	MRB1590	mitochondrial RNA binding complex 1 subunit (MRB1590)	72.678	14.8	0	53.996	1		0.955187	-0.0199114	0.732834	0.134994		8.1	4	4	1.13075	1.04845	0.0205473	15.097	4	13.3	6	6	0.67543	0.85021	-0.0704738	23.497	6	14.8	7	7	0.67402	0.97767	-0.00980771	18.755	8
	330	Tb927.10.11300	Tb927.10.11300	PFC16	paraflagellar rod component, putative (PFC16)	14.328	19.8	0	4.9638	1		0.933569	-0.0298537	0.73316	0.134801		10.3	1	1	1.12628	1.03354	0.0143264	NaN	1	10.3	1	1	0.62495	0.77661	-0.109797	NaN	1	9.5	1	1	0.70069	1.0137	0.00590945	NaN	1
	145	Tb927.10.5340;Tb927.10.5330;Tb11.v5.1060;Tb11.v5.0243	Tb927.10.5340;Tb927.10.5330;Tb11.v5.1060;Tb11.v5.0243	RPS18	40S ribosomal protein S18, putative (RPS18);40S ribosomal protein S18, putative;40S ribosomal protein S18, putative;40S ribosomal protein S18, putative	17.51	27.5	0	62.451	4		0.950803	-0.0219092	0.734293	0.134131		20.9	4	4	1.14322	1.03107	0.0132865	8.2082	4	22.2	4	4	0.79285	1.002	0.000867722	19.021	4	20.3	3	3	0.57893	0.83199	-0.0798819	12.544	3
	280	Tb927.1.5000	Tb927.1.5000		hypothetical protein, conserved	30.458	15.1	0	22.068	1		0.97194	-0.0123603	0.73436	0.134091		4.4	1	1	0.990295	0.903179	-0.0442261	NaN	1	11.4	3	3	0.79157	0.9916	-0.00366348	30.774	3	14.4	3	3	0.70297	1.0252	0.0108086	90.217	3
	1625	Tb927.5.3880	Tb927.5.3880		hypothetical protein, conserved	82.603	16.8	0	70.68	1		0.985972	-0.00613555	0.734401	0.134067		16.8	10	10	1.08782	0.995718	-0.00186347	11.065	12	15.8	9	9	0.759	0.95074	-0.0219382	9.776	10	6.8	3	3	0.69461	1.0125	0.00539503	13.206	3
	757	Tb927.11.11470	Tb927.11.11470		hypothetical protein, conserved	32.022	29.1	0	26.956	1	1	0.981275	-0.00820938	0.7352	0.133595		29.1	7	7	1.03434	0.943752	-0.025142	12.461	8	23.8	6	6	0.77619	0.97363	-0.0116061	9.6593	6	20.9	5	5	0.69942	1.0283	0.0121198	9.6067	5
	1232	Tb927.2.4400	Tb927.2.4400		hypothetical protein, conserved	136.9	13.5	0	39.424	1	1	0.977756	-0.00976973	0.735449	0.133448		11.5	9	9	1.16085	1.03507	0.0149689	38.127	9	12.4	10	10	0.72959	0.93598	-0.0287334	17.975	10	9.9	7	7	0.66601	0.96484	-0.0155447	19.96	7
	1742	Tb927.6.410	Tb927.6.410		hypothetical protein, conserved	93.965	39.5	0	221.5	1		0.977284	-0.00997943	0.735597	0.13336		25.8	17	17	0.9996	0.923873	-0.0343878	13.749	19	38.3	22	22	0.78816	0.98508	-0.0065285	11.955	28	27.7	17	17	0.70384	1.0256	0.010978	20.497	20
	2164	Tb927.8.7040	Tb927.8.7040		hypothetical protein, conserved	21.365	38.6	0	97.948	1	1	0.978524	-0.00942863	0.735691	0.133305		38.6	7	7	1.13868	1.02169	0.00931914	5.4685	9	38.6	7	7	0.79459	0.98958	-0.00454909	10.123	9	38.6	7	7	0.66269	0.92671	-0.0330562	5.6645	11
	2046	Tb927.8.2730	Tb927.8.2730		hypothetical protein, conserved	42.775	18.8	0	16.191	1		0.984984	-0.00657071	0.737347	0.132328		18.8	7	7	1.08246	0.968523	-0.0138901	7.269	7	8.9	3	3	0.7375	0.9629	-0.0164188	9.405	3	8.6	3	3	0.70923	1.0247	0.0105967	7.0696	3
	963	Tb927.11.290	Tb927.11.290		phosphatase and tensin homologue, putative	28.978	5	0.0056083	2.2116	1		0.934468	-0.0294358	0.738709	0.131527		5	1	1	0.974944	0.868885	-0.0610376	NaN	1	5	1	1	0.76541	1.005	0.00216606	NaN	1	0	0	0	NaN	NaN		NaN	0
	287	Tb927.1.750	Tb927.1.750		hypothetical protein, conserved	132.69	21.2	0	8.332	1		0.963768	-0.0160274	0.739187	0.131246		19.6	1	1	1.03682	0.926441	-0.0331824	10.93	2	21.2	3	3	0.79178	1.0026	0.0011277	20.342	4	0	0	0	NaN	NaN		NaN	0
	1656	Tb927.6.1090	Tb927.6.1090	RPT3	proteasome regulatory ATPase subunit 3 (RPT3)	44.859	17.6	0	19.21	1		0.899979	-0.0457676	0.739753	0.130913		9.2	2	2	1.22344	1.14252	0.0578631	58.939	3	9.2	2	2	0.57517	0.71241	-0.14727	19.208	3	17.6	4	3	0.61678	0.89558	-0.0478956	54.994	4
	1974	Tb927.7.7080	Tb927.7.7080		mitochondrial glycoprotein-like protein	41.205	39.2	0	136.49	1	1	0.979054	-0.00919318	0.740601	0.130416		39.2	10	10	1.02608	0.927128	-0.0328604	18.324	12	34.4	7	7	0.79824	1.0079	0.00341745	11.89	8	34.4	7	7	0.69927	1.0043	0.00186346	12.041	7
	441	Tb927.10.15180	Tb927.10.15180		nucleosome assembly protein, putative	41.302	6.3	0.00097418	3.7802	1		0.945645	-0.0242718	0.740754	0.130326		6.3	2	2	1.15632	1.05599	0.0236594	NaN	1	3	1	1	0.78634	0.96933	-0.0135283	NaN	1	3	1	1	0.5736	0.82614	-0.0829463	NaN	1
	751	Tb927.11.11310	Tb927.11.11310		hypothetical protein, conserved	55.612	8.2	0	19.255	1	1	0.974447	-0.011242	0.741102	0.130122		8.2	3	3	1.13624	1.04062	0.0172901	53.811	3	2	1	1	0.75415	0.95145	-0.021614	NaN	1	5.4	2	2	0.64828	0.93454	-0.0294021	10.595	2
	2056	Tb927.8.2980	Tb927.8.2980		Bis(5-adenosyl)-triphosphatase, putative	44.803	8.4	0	7.3651	1		0.864903	-0.0630328	0.741266	0.130026		5.3	2	2	1.06015	0.980296	-0.00864273	5.29	2	3.1	1	1	0.48775	0.59951	-0.222204	NaN	1	5.3	2	2	0.78626	1.1009	0.0417479	15.754	2
	1921	Tb927.7.5110	Tb927.7.5110		hypothetical protein, conserved	62.367	16.7	0	66.442	1	1	0.918985	-0.0366915	0.74234	0.129397		16.7	6	6	1.24234	1.12807	0.052336	16.515	5	2.5	1	1	0.62479	0.78279	-0.106355	NaN	1	2.3	1	1	0.61021	0.87891	-0.0560556	NaN	1
	595	Tb927.10.6070	Tb927.10.6070		universal minicircle sequence binding protein (UMSBP), putative,predicted zinc finger protein	14.566	47.1	0	32.929	1		0.977243	-0.0099975	0.742797	0.12913		47.1	5	4	1.02723	0.931012	-0.0310447	10.938	9	47.1	5	4	0.81099	1.0302	0.0129215	1.1051	8	27.9	3	2	0.66768	0.97304	-0.0118693	5.4886	3
	924	Tb927.11.17000;Tb11.v5.0404	Tb927.11.17000;Tb11.v5.0404		leucine-rich repeat protein (LRRP), putative;hypothetical protein, conserved	109.72	10.4	0	30.292	2		0.935555	-0.0289307	0.743444	0.128752		3.6	2	2	0.857045	0.792393	-0.101059	17.184	2	4.3	3	3	0.77472	0.98937	-0.00464126	8.8727	2	5.3	3	3	0.70431	1.0445	0.0189084	14.118	2
	1956	Tb927.7.6230	Tb927.7.6230	ARF3	ADP-ribosylation factor, putative (ARF3)	20.714	30	0	19.53	1		0.949225	-0.0226306	0.74475	0.12799		24.2	3	3	0.956389	0.877501	-0.0567525	26.668	3	29.5	4	4	0.71649	0.90131	-0.0451258	28.708	4	17.9	3	3	0.75158	1.0814	0.0339864	18.002	3
	1815	Tb927.7.1600	Tb927.7.1600		C-1-tetrahydrofolate synthase, cytoplasmic, putative	31.931	41.6	0	60.593	1	1	0.983714	-0.0071312	0.744984	0.127853		25.8	6	6	1.1098	1.02434	0.0104433	13.45	6	32.6	5	5	0.77298	0.95708	-0.0190518	13.125	4	27.2	4	4	0.66731	0.97099	-0.0127852	19.819	4
	823	Tb927.11.13830	Tb927.11.13830		hypothetical protein, conserved	36.135	6.7	0	4.2439	1	1	0.459452	-0.33776	0.745026	0.127828		3.5	1	1	0.225286	0.205948	-0.686243	NaN	1	3.2	1	1	0.81656	1.025	0.0107239	21.216	2	0	0	0	NaN	NaN		NaN	0
	2316	Tb927.9.2470;Tb927.9.2490	Tb927.9.2470;Tb927.9.2490	NOP86;NOP66	nucleolar protein (NOP86);nucleolar protein (NOP66)	86.202	10	0	23.907	2		0.944153	-0.0249578	0.745086	0.127794		8.8	5	5	1.10273	1.00225	0.000978232	15.634	5	10	6	6	0.81139	1.027	0.0115704	104.24	6	5.4	3	3	0.56343	0.81767	-0.0874219	18.533	3
	2090	Tb927.8.4540	Tb927.8.4540	PBP1	PAB1-binding protein , putative	59.599	11.6	0	18.165	1		0.960552	-0.0174791	0.74516	0.127751		6.5	2	2	1.20388	1.06269	0.0264058	0.81788	4	11.6	4	4	0.7076	0.90929	-0.0412976	27.302	6	6.5	2	2	0.6232	0.91718	-0.0375454	13.691	3
	2069	Tb927.8.3300	Tb927.8.3300		hypothetical protein, conserved	77.891	24.2	0	108.25	1	1	0.990164	-0.00429268	0.745319	0.127658		22.4	15	15	1.12198	1.01504	0.00648444	11.58	16	19.5	13	13	0.77846	0.97735	-0.00994988	15.792	15	10.6	7	7	0.67561	0.97856	-0.00941254	20.632	8
	1226	Tb927.2.4140	Tb927.2.4140		hypothetical protein, conserved	81.381	6	0	10.479	1		0.831306	-0.0802389	0.745511	0.127546		1.2	1	1	0.74151	0.687427	-0.162773	NaN	1	6	4	4	0.80082	1.0053	0.00229568	41.425	5	0	0	0	NaN	NaN		NaN	0
	2236	Tb927.9.11960	Tb927.9.11960		hypothetical protein, conserved	69.555	5.9	0	4.7149	1		0.712028	-0.147503	0.745856	0.127345		4	2	2	0.550934	0.502462	-0.298897	108.01	2	1.9	1	1	0.80195	1.009	0.00389117	NaN	1	1.8	1	1	NaN	NaN		NaN	0
	653	Tb927.10.8070	Tb927.10.8070		ATPase, putative	55.555	42.1	0	159.66	1		0.979623	-0.00894082	0.746653	0.126881		24.4	7	7	1.12285	1.03048	0.0130404	3.3127	7	37.8	11	11	0.76272	0.94806	-0.0231642	36.36	12	27.6	8	8	0.66513	0.96228	-0.0166985	16.338	8
	625	Tb927.10.7380	Tb927.10.7380		hypothetical protein, conserved	39.706	19.5	0	8.2802	1	1	0.967678	-0.0142692	0.747449	0.126418		15.8	2	2	1.09581	1.00339	0.00147063	7.0953	2	19.5	3	3	0.80834	1.0124	0.00535214	20.464	3	19.5	3	3	0.61594	0.89201	-0.0496303	45.346	3
	505	Tb927.3.1370;Tb927.10.2840	Tb927.3.1370;Tb927.10.2840		40S ribosomal protein S25, putative;ribosomal protein S25, putative	12.56	15.9	0	5.8755	2		0.913913	-0.039095	0.748068	0.126059		7.1	1	1	NaN	NaN		NaN	0	15.9	2	2	0.7993	1.0011	0.000477461	8.8104	2	8.8	1	1	0.58145	0.83432	-0.0786673	NaN	1
	587	Tb927.10.5830	Tb927.10.5830		hypothetical protein, conserved	59.941	7.7	0	7.1684	1	1	0.959301	-0.0180453	0.750326	0.12475		7.7	2	2	1.10374	0.992556	-0.00324507	6.0246	2	7.7	2	2	0.68856	0.86807	-0.0614453	19.722	2	7.7	2	2	0.7138	1.0246	0.0105544	0.84921	2
	612	Tb927.10.6820	Tb927.10.6820		hypothetical protein, conserved	34.82	5.1	0	9.7552	1		0.94944	-0.0225324	0.750522	0.124636		0	0	0	NaN	NaN		NaN	0	5.1	1	1	0.7246	0.90159	-0.0449909	13.093	2	5.1	1	1	0.69186	0.99983	-7.38363e-05	11.289	2
	1354	Tb927.3.3940	Tb927.3.3940	DRBD11	RNA-binding protein, putative (DRBD11)	61.716	4.6	0	8.8973	1		0.950273	-0.0221515	0.750625	0.124577		2.7	1	1	1.08889	0.9998	-8.68676e-05	NaN	1	4.6	2	2	0.71633	0.9032	-0.0442161	NaN	1	1.9	1	1	NaN	NaN		NaN	0
	117	Tb927.6.4980;Tb11.0390;Tb11.0290	Tb927.6.4980;Tb11.0390;Tb11.0290	RPS14;RPS14;RPS14	40S ribosomal protein S14 (RPS14);40S ribosomal protein S14, putative,chrXI additional, unordered contigs (RPS14);40S ribosomal protein S14, putative,chrXI additional, unordered contigs (RPS14)	15.513	24.3	0	20.981	3		0.9425	-0.0257187	0.751349	0.124158		23.6	3	3	1.08976	0.9995	-0.000217071	12.52	3	16.7	3	3	0.70698	0.88875	-0.0512204	17.757	3	0	0	0	NaN	NaN		NaN	0
	1027	Tb927.11.4900	Tb927.11.4900		guanine nucleotide-binding beta subunit-like protein,G-protein (beta)-like protein,beta transducin-like protein	61.857	19.6	0	21.291	1		0.924635	-0.0340297	0.751738	0.123934		12.9	6	6	1.21093	1.09481	0.0393392	16.474	8	19.6	9	9	0.74355	0.91648	-0.037877	10.182	10	4.8	2	2	0.54819	0.78786	-0.103551	3.0815	4
	2318	Tb927.9.2600	Tb927.9.2600		hypothetical protein, conserved	24.515	40.6	0	180.19	1		0.950393	-0.0220966	0.751927	0.123825		35.4	5	5	1.15511	1.06077	0.025622	12.905	7	40.6	6	6	0.75179	0.94435	-0.024867	9.8325	10	35.4	5	5	0.59199	0.85695	-0.0670445	17.094	8
	890	Tb927.11.15990	Tb927.11.15990	TbNup109	nucleoporin Nup109 (TbNup109)	108.72	25.1	0	163.87	1		0.98269	-0.00758361	0.75229	0.123615		23.3	20	20	1.12836	1.02509	0.0107637	18.203	24	24	20	20	0.76726	0.96283	-0.0164504	15.311	22	17.2	13	13	0.66951	0.96147	-0.0170643	18.716	13
	2202	Tb927.9.10150	Tb927.9.10150		hypothetical protein, conserved	65.017	4	0.00049237	3.9341	1		0.530456	-0.27535	0.753003	0.123204		2	1	1	0.308347	0.284738	-0.545555	NaN	1	4	2	2	0.79148	0.98822	-0.00514636	228.67	2	0	0	0	NaN	NaN		NaN	0
	488	Tb927.10.240	Tb927.10.240	PEX14	peroxin 14, putative (PEX14)	39.937	22.7	0	43.232	1		0.960882	-0.01733	0.753751	0.122772		22.7	6	6	1.14531	1.05157	0.0218378	4.7603	6	15.8	4	4	0.75383	0.94461	-0.0247475	5.5657	4	12	3	3	0.61747	0.89314	-0.0490805	4.1182	3
	182	Tb927.10.5620;Tb11.v5.0531	Tb927.10.5620;Tb11.v5.0531	ALD	fructose-bisphosphate aldolase, glycosomal (ALD);fructose-bisphosphate aldolase, glycosomal, putative	41.071	69.1	0	272.59	2		0.993823	-0.0026911	0.754156	0.122539		55.6	21	21	1.07084	0.979432	-0.00902576	13.914	29	68.8	23	23	0.79691	1.0035	0.00151738	18.192	29	52.4	21	21	0.69274	0.9987	-0.00056495	11.66	29
	271	Tb927.1.4050	Tb927.1.4050		protein phosphatase with EF-Hand domains (PPEF),ser/thr protein phosphatase, putative	105.75	14.6	0	34.482	1		0.953731	-0.0205739	0.754797	0.12217		8.1	6	6	0.953016	0.863632	-0.0636711	44.85	6	11.8	8	8	0.84592	1.0505	0.0213961	11.697	8	10.2	6	6	0.65337	0.95621	-0.0194467	13.539	6
	696	Tb927.10.9830	Tb927.10.9830		hypothetical protein, conserved	17.194	52.2	0	161.94	1	1	0.979708	-0.00890326	0.756414	0.121241		52.2	6	6	1.11059	0.998402	-0.00069434	8.1357	7	46.5	5	5	0.76655	0.93364	-0.0298206	9.0575	7	46.5	5	5	0.69727	1.0088	0.00380507	4.9296	9
	2402	Tb927.9.7620;Tb927.9.7590	Tb927.9.7620;Tb927.9.7590		60S ribosomal protein L11, putative;60S ribosomal protein L11, putative	22.369	12.4	0	21.899	2		0.917839	-0.0372333	0.756465	0.121211		12.4	2	2	1.23449	1.10848	0.0447259	10.886	3	12.4	2	2	0.61748	0.78297	-0.106255	18.525	2	7.2	1	1	0.61551	0.8909	-0.050171	NaN	1
	2303	Tb927.9.1590	Tb927.9.1590		hypothetical protein, conserved	15.734	22.1	0	14.833	1	1	0.938005	-0.027795	0.756967	0.120923		7.1	1	1	1.2212	1.07862	0.0328689	NaN	1	22.1	2	2	0.71275	0.91943	-0.0364813	14.295	2	15	1	1	0.56576	0.8322	-0.0797723	NaN	1
	2115	Tb927.8.5560	Tb927.8.5560		hypothetical protein, conserved	59.988	25.1	0	43.849	1	1	0.970192	-0.0131422	0.757067	0.120866		25.1	9	9	1.02379	0.903342	-0.0441476	19.732	9	22.1	8	8	0.76671	1.0059	0.00255481	32.307	8	17.6	6	6	0.68328	1.005	0.00216606	26.794	6
	1679	Tb927.6.2080	Tb927.6.2080		hypothetical protein, conserved	45.886	21.5	0	11.64	1	1	0.960425	-0.0175365	0.757088	0.120854		21.5	6	6	1.15268	1.03364	0.0143714	22.965	6	17.7	5	5	0.76168	0.97569	-0.0106881	30.676	5	15.7	4	4	0.59892	0.87843	-0.0562928	21.652	4
	206	Tb11.v5.0713;Tb927.2.1330	Tb11.v5.0713		retrotransposon hot spot (RHS) protein, putative	78.342	18.8	0	33.173	2		0.916103	-0.0380558	0.758224	0.120203		15.1	9	6	1.22549	1.1247	0.0510348	39.038	6	15.4	10	5	0.66987	0.83527	-0.0781731	5.8646	5	6.5	3	2	0.57273	0.81841	-0.0870291	16.069	2
	1035	Tb927.11.5090	Tb927.11.5090		aspartate aminotransferase, mitochondrial	45.993	14.4	0	24.95	1	1	0.925537	-0.033606	0.760271	0.119031		12	3	3	1.21499	1.10058	0.0416224	3.2751	2	11.3	3	3	0.65345	0.81485	-0.0889223	13.975	3	8.9	2	2	0.60517	0.88406	-0.0535183	9.4237	3
	286	Tb927.1.740	Tb927.1.740		hypothetical protein, conserved	48.865	66.7	0	323.31	1	1	0.997559	-0.00106151	0.760304	0.119013		66	22	22	1.09815	1.00321	0.00139185	12.329	41	66.2	23	23	0.80358	0.99515	-0.00211145	7.0524	46	66.7	23	23	0.68692	0.99434	-0.00246509	8.9853	41
	681	Tb927.10.9190	Tb927.10.9190	IleRS	isoleucyl-tRNA synthetase, putative (IleRS)	130.6	7.2	0	15.891	1	1	0.937186	-0.028174	0.762117	0.117978		3.3	3	3	1.12327	1.01167	0.00503673	0.89656	2	3.7	3	3	0.6409	0.80744	-0.0928897	13.96	3	6.2	5	5	0.69934	1.0077	0.00333126	9.7698	5
	596	Tb927.10.6160	Tb927.10.6160		hypothetical protein, conserved	81.54	7.9	0	11.242	1		0.854818	-0.0681263	0.762168	0.11795		3.4	2	2	0.820883	0.739208	-0.131234	29.286	2	0	0	0	NaN	NaN		NaN	0	7.9	4	4	0.67547	0.98851	-0.00501893	6.9903	3
	2298	Tb927.9.15240	Tb927.9.15240		hypothetical protein, conserved	28.749	33.9	0	34.423	1	1	0.961586	-0.017012	0.762486	0.117768		33.9	6	6	0.954107	0.88098	-0.0550341	16.393	6	26.2	4	4	0.81262	1.0222	0.00953588	16.729	4	28.6	5	5	0.68198	0.98733	-0.00553767	19.759	5
	2144	Tb927.8.6480	Tb927.8.6480		hypothetical protein, conserved	36.943	39.8	0	49.765	1	1	0.985646	-0.0062792	0.762497	0.117762		32.7	8	8	1.1057	1.01813	0.00780451	26.189	8	31.6	7	7	0.77853	0.97558	-0.0107371	25.56	7	34.8	9	9	0.66315	0.96404	-0.0159049	85.142	9
	2305	Tb927.9.1640	Tb927.9.1640		hypothetical protein, conserved	14.886	6.9	0.0027347	2.7055	1		0.834972	-0.0783279	0.762566	0.117723		6.9	1	1	1.0761	0.986388	-0.00595231	NaN	1	0	0	0	NaN	NaN		NaN	0	6.9	1	1	0.48319	0.7068	-0.150703	NaN	1
	174	Tb927.10.15370;Tb11.v5.0480	Tb927.10.15370;Tb11.v5.0480	RPC40	RNA-binding protein RPC40, putative,DNA-directed RNA polymerase, alpha subunit, putative (RPC40);DNA-directed RNA polymerase, alpha subunit, putative	37.377	10.1	0.0095953	1.9587	2		0.8532	-0.0689491	0.762953	0.117502		5.3	1	1	1.07827	0.987654	-0.00539504	NaN	1	4.7	1	1	0.68643	0.73705	-0.132503	NaN	1	0	0	0	NaN	NaN		NaN	0
	200	Tb927.10.2770;Tb11.v5.0684	Tb927.10.2770;Tb11.v5.0684		eukaryotic translation initiation factor 5, putative;eukaryotic translation initiation factor 5, putative	42.945	5.5	0	5.1433	2		0.79126	-0.101681	0.763031	0.117458		5.5	2	2	1.14264	1.05238	0.0221713	6.0355	2	2.6	1	1	0.80724	1.0157	0.00676545	NaN	1	2.9	1	1	0.31843	0.46347	-0.333978	NaN	1
	1685	Tb927.6.2190	Tb927.6.2190		hypothetical protein, conserved	31.531	21.3	0	13.367	1	1	0.86204	-0.0644727	0.763235	0.117342		20.2	4	4	1.20084	1.07408	0.0310362	17.466	6	21.3	5	5	0.75839	0.96566	-0.0151758	31.548	6	11.5	2	2	0.42518	0.61762	-0.209279	47.482	2
	2307	Tb927.9.1700	Tb927.9.1700		hypothetical protein, conserved	67.667	31.6	0	323.31	1		0.994718	-0.00230001	0.763546	0.117165		30.1	13	13	1.08144	0.988533	-0.00500883	11.68	21	29.3	13	13	0.78934	0.98893	-0.00483445	21.786	20	27.8	12	12	0.70012	1.0068	0.00294321	19.091	19
	636	Tb927.10.7570;Tb11.v5.0774	Tb927.10.7570;Tb11.v5.0774		dihydrolipoamide acetyltransferase E2 subunit, putative;dihydrolipoamide acetyltransferase precursor, putative	48.107	18.8	0	97.54	2	1	0.984731	-0.00668252	0.764225	0.116779		18.8	6	6	1.05524	0.96367	-0.0160718	14.713	6	16.2	5	5	0.8114	1.0194	0.00834463	13.04	5	10	3	3	0.6751	0.97203	-0.0123203	16.535	3
	1438	Tb927.4.1950	Tb927.4.1950	CPR	NADPH--cytochrome p450 reductase, putative (CPR)	68.998	13.9	0	12.013	1		0.859898	-0.0655531	0.765725	0.115927		13.9	6	6	1.324	1.20327	0.0803624	25.947	6	9.8	5	5	0.60614	0.76152	-0.118319	27.139	5	5.4	3	3	0.47812	0.6939	-0.158703	3.7262	3
	1397	Tb927.3.5610	Tb927.3.5610		ribosomal protein L3 mitochondrial, putative	54.986	23	0	115.93	1	1	0.96207	-0.0167933	0.765966	0.11579		17.5	5	5	0.969368	0.893096	-0.0491017	16.118	5	16.9	5	5	0.76164	0.96019	-0.0176428	11.719	5	14.2	4	4	0.71735	1.0384	0.0163647	13.368	6
	952	Tb927.11.2530	Tb927.11.2530		kinteoplast poly(A) polymerase complex 1 subunit,mitochondrial edited mRNA stability factor 1 subunit,mitochondrial RNA binding complex 1 subunit	84.864	9.1	0	29.074	1	1	0.949094	-0.0226909	0.766143	0.11569		6.3	4	4	1.13006	1.02689	0.0115256	17.47	4	7.6	5	5	0.78502	0.984	-0.0070049	15.416	6	3.1	2	2	0.5841	0.84607	-0.0725937	26.912	2
	785	Tb927.11.12530	Tb927.11.12530		hypothetical protein, conserved	90.654	17.2	0	59.134	1		0.955668	-0.0196931	0.766784	0.115327		13.5	7	7	1.06002	0.960615	-0.0174507	20.117	7	10.3	6	6	0.6914	0.87298	-0.0589957	17.506	6	10.2	6	6	0.7164	1.0408	0.0173673	31.063	6
	2412	Tb927.9.8130;Tb927.9.8100	Tb927.9.8130;Tb927.9.8100		nascent polypeptide associated complex subunit, putative;nascent polypeptide associated complex subunit, putative	20.129	42	0	39.543	2		0.776961	-0.109601	0.768263	0.11449		34.6	2	2	1.33634	1.19457	0.0772123	15.837	2	34.6	2	2	0.67853	0.85634	-0.0673538	14.21	2	23.9	2	2	0.31923	0.4585	-0.338661	110.52	2
	129	Tb927.7.4810;Tb11.v5.0163	Tb927.7.4810;Tb11.v5.0163		hypothetical protein, conserved;hypothetical protein, conserved	52.176	36.5	0	53.695	2		0.956654	-0.0192449	0.768869	0.114148		33	10	10	1.05454	0.93423	-0.0295461	12.589	12	33.6	10	10	0.70232	0.89134	-0.0499566	28.318	12	30.1	9	9	0.71436	1.0514	0.021768	11.271	9
	2340	Tb927.9.3760	Tb927.9.3760	TbGLE2	poly(A) export protein, putative (TbGLE2)	38.351	79.7	0	323.31	1		0.976474	-0.0103394	0.769032	0.114056		79.7	20	20	1.01761	0.927816	-0.0325382	13.537	31	69.6	16	16	0.81182	1.0131	0.00565232	8.2644	25	67.9	14	14	0.68959	0.99053	-0.00413237	11.883	22
	1821	Tb927.7.1730;Tb927.7.1750;Tb927.7.1740	Tb927.7.1730;Tb927.7.1750;Tb927.7.1740		60S ribosomal protein L7, putative;60S ribosomal protein L7, putative;60S ribosomal protein L7, putative	27.713	36.4	0	39.645	3		0.946105	-0.0240608	0.770038	0.113488		21.9	5	5	1.19053	1.06738	0.0283207	2.8742	6	28.9	5	5	0.72067	0.90549	-0.0431163	21.014	6	32.6	5	5	0.60783	0.87622	-0.0573868	13.965	6
[truncated: 892 more rows]
