# Supplementary material for: Homologue replacement in the import motor of the mitochondrial inner membrane of trypanosomes
Source: eLife. 2020 Feb 27;9:e52560. doi: 10.7554/eLife.52560 (PMC7064343; doi:10.7554/eLife.52560)
Supplement: Figure 9—source data 1. [file elife-52560-fig9-data1.xlsx]

## Sheet: TbPam27 SILAC RNAi
	Figure 9 - source data 1: List of proteins identified in SILAC-MS experiments of mitochondria-enriched fractions from TbPam27 RNAi cells
														Data determined across Replicates 1 - 3							Replicate 1							Replicate 2							Replicate 3
	Protein Group ID	Protein IDs	Majority protein IDs	Gene name	Protein Description	Mol. Weight [kDa]	Sequence Coverage [%]	Q-value	Score	# of proteins in protein group	Mitochondrial proteome (acc. to Peikert et al., 2017)	MCP (mito carrier)	TargetP (targeting seq.)	Mean log2 Ratio normalized +/- Tet	p-Value	-log10 p-Value	p-value < 0.05	Sequence Coverage [%]	Peptides	Unique Peptides	Ratio Normalized +/- Tet	log2 Ratio Normalized +/- Tet	Ratio Variability [%]	SILAC peptide pairs	Sequence Coverage [%]	Peptides	Unique Peptides	Ratio Normalized +/- Tet	log2 Ratio Normalized +/- Tet	Ratio Variability [%]	SILAC peptide pairs	Sequence Coverage [%]	Peptides	Unique Peptides	Ratio Normalized +/- Tet	log2 Ratio Normalized +/- Tet	Ratio Variability [%]	SILAC peptide pairs
	649	Tb927.10.13830	Tb927.10.13830	TbPam27	chaperone protein DNAj, putative	27.234	29.2	0	10.692	1	1		1	-2.43027	0.00364398	2.43842	+	23.8	5	5	0.152683	-2.71138	15.062	6	20	4	4	0.215457	-2.21453	34.759	6	22.9	5	5	0.19413	-2.36491	196.09	6
	583	Tb927.10.12540	Tb927.10.12540	NDUFS1	electron transfer protein, putative,ferredoxin, putative	33.754	10.6	0	3.8892	1	1		1	-1.82086	0.0499778	1.30122	+	10.6	2	2	0.256299	-1.9641	12.199	3	10.6	2	2	0.312598	-1.67762	3.7477	2	0	0	0	NaN		NaN	0
	3435	Tb927.8.2550	Tb927.8.2550	PRI1	mitochondrial DNA primase (PRI1)	69.862	46.7	0	55.6	1	1		1	-1.71029	0.00318759	2.49654	+	32.9	12	12	0.288259	-1.79456	34.355	14	34.3	15	15	0.349357	-1.51723	35.177	15	26.4	11	11	0.2834	-1.81909	100.94	15
	3377	Tb927.8.1490	Tb927.8.1490		hypothetical protein, conserved	11.249	53.4	0	9.779	1	1		1	-1.65856	0.0192077	1.71652	+	39.8	2	2	0.24769	-2.01339	18.608	2	13.6	1	1	0.429609	-1.21891	NaN	1	13.6	1	1	0.29867	-1.74338	NaN	1
	1539	Tb927.11.16510	Tb927.11.16510		hypothetical protein, conserved	16.327	53.4	0	47.137	1	1			-1.55561	0.0156774	1.80472	+	53.4	6	6	0.443833	-1.17191	11.63	13	53.4	6	6	0.282095	-1.82574	9.235	13	18.5	2	2	0.31443	-1.66919	4.215	3
	1936	Tb927.11.8700	Tb927.11.8700		hypothetical protein, conserved	65.26	7.2	0	10.003	1	1			-1.50081	0.0160324	1.795	+	3.8	1	1	0.279314	-1.84004	2.3511	2	7.2	2	2	0.35643	-1.48831	4.4642	2	3.8	1	1	0.44317	-1.17407	NaN	1
	913	Tb927.10.4280	Tb927.10.4280		hypothetical protein, conserved	24.055	54.7	0	112.64	1	1		1	-1.48707	0.0172088	1.76425	+	38.8	6	6	0.461936	-1.11423	3.4352	17	42.3	7	7	0.289737	-1.78718	9.6678	17	48.3	7	7	0.3392	-1.55979	7.2147	17
	2795	Tb927.5.920	Tb927.5.920		hypothetical protein, conserved	50.734	5.6	0	7.1992	1	1		1	-1.36684	0.0202029	1.69459	+	2.2	1	1	0.496574	-1.00992	26.805	2	5.6	2	2	0.309722	-1.69095	32.095	3	2.2	1	1	0.37902	-1.39965	NaN	1
	3850	Tb927.9.14160	Tb927.9.14160	RISP	rieske iron-sulfur protein, mitochondrial precursor (RISP)	33.655	43.1	0	78.176	1	1		1	-1.35549	0.00887148	2.052	+	40.7	10	10	0.462984	-1.11096	10.039	26	34.7	9	9	0.34236	-1.54641	12.489	21	24.9	7	7	0.37655	-1.40909	42.323	13
	850	Tb927.10.2970	Tb927.10.2970		hypothetical protein, conserved	13.79	47	0	168.57	1	1		1	-1.28255	0.00234655	2.62957	+	38.3	8	8	0.447728	-1.15931	25.587	12	37.4	8	8	0.389772	-1.3593	12.636	13	47	11	11	0.39803	-1.32905	80.254	15
	2368	Tb927.3.5600	Tb927.3.5600		hypothetical protein, conserved	31.553	27.7	0	13.958	1	1		1	-1.24771	0.000998562	3.00062	+	15.1	3	3	0.424484	-1.23622	17.698	3	10.7	2	2	0.40024	-1.32106	14.277	2	19.6	3	3	0.43957	-1.18584	1.9987	3
	3522	Tb927.8.4550	Tb927.8.4550		hypothetical protein, conserved	21.585	19.1	0	8.0393	1	1		1	-1.23443	0.00419255	2.37752	+	5.5	1	1	0.38616	-1.37273	34.558	2	19.1	2	2	0.468143	-1.09498	27.817	3	5.5	1	1	0.42467	-1.23559	NaN	1
	1053	Tb927.10.7620	Tb927.10.7620		mitochondrial ATP-dependent zinc metallopeptidase, putative,metallo-peptidase, Clan MA(E) Family M41	71.088	29.1	0	70.672	1	1		1	-1.22843	0.00847253	2.07199	+	23.1	10	10	0.36479	-1.45486	28.459	15	23.4	10	10	0.468033	-1.09532	23.056	15	13.4	5	5	0.4553	-1.13511	26.366	7
	1107	Tb927.10.8620	Tb927.10.8620		hypothetical protein, conserved	21.046	14.8	0	5.5316	1	1		1	-1.21974	0.0362028	1.44126	+	14.8	2	2	0.452878	-1.14281	11.441	4	14.8	2	2	0.315109	-1.66607	31.071	3	8.7	1	1	0.55466	-0.850324	NaN	1
	2835	Tb927.6.1700	Tb927.6.1700		hypothetical protein, conserved	22.082	20.5	0	7.7157	1	1		1	-1.20036	0.0104787	1.97969	+	5.3	1	1	0.373497	-1.42083	10.304	3	20.5	4	4	0.438943	-1.18789	38.324	5	5.3	1	1	0.50266	-0.992345	18.455	3
	482	Tb927.10.10130	Tb927.10.10130	MRB10130	mitochondrial RNA binding complex 1 subunit (MRB10130)	61.046	20	0	26.706	1	1			-1.16225	0.00653922	2.18447	+	10.5	4	4	0.394104	-1.34335	79.76	5	13.9	5	5	0.46066	-1.11823	18.966	6	12.5	4	4	0.49135	-1.02518	52.115	5
	658	Tb927.10.13990	Tb927.10.13990		hypothetical protein, conserved	39.633	9.7	0	5.9812	1	1		1	-1.1564	0.00408539	2.38877	+	9.7	3	3	0.4094	-1.28842	18.958	2	5.5	2	2	0.450979	-1.14887	1.1201	2	5.3	1	1	0.48906	-1.03192	NaN	1
	3473	Tb927.8.3450	Tb927.8.3450		hypothetical protein, conserved	16.536	17.1	0	4.2854	1	1			-1.15006	0.00971516	2.01255	+	10	1	1	0.456121	-1.13251	NaN	1	17.1	2	2	0.445157	-1.16761	36.826	2	0	0	0	NaN		NaN	0
	3286	Tb927.7.6350	Tb927.7.6350		NADH-ubiquinone oxidoreductase, mitochondrial, putative	30.925	17.6	0	20.487	1	1		1	-1.14549	0.00659986	2.18046	+	14.7	3	3	0.411624	-1.2806	4.7982	3	17.6	4	4	0.511954	-0.965914	23.581	3	14.7	3	3	0.43832	-1.18994	27.168	3
	623	Tb927.10.13300	Tb927.10.13300		30S ribosomal protein S8, putative	32.681	8.9	0.001594	2.537	1	1		1	-1.13714	0.0147561	1.83103	+	5.7	1	1	0.440917	-1.18142	NaN	1	5.7	1	1	0.391236	-1.35389	NaN	1	3.2	1	1	0.54483	-0.876122	NaN	1
	683	Tb927.10.14350	Tb927.10.14350		hypothetical protein, conserved	10.907	44.3	0	13.637	1	1		1	-1.1297	0.011583	1.93618	+	44.3	3	3	0.440742	-1.18199	21.74	5	25.8	2	2	0.537374	-0.896001	23.984	4	16.5	1	1	0.40301	-1.31111	NaN	1
	550	Tb927.10.11890	Tb927.10.11890		hypothetical protein, conserved	36.838	3.5	0.00056433	3.2058	1	1		1	-1.12323	0.037768	1.42288	+	0	0	0	NaN		NaN	0	3.5	1	1	0.480792	-1.05651	NaN	1	3.5	1	1	0.43832	-1.18994	9.6167	2
	1785	Tb927.11.5500	Tb927.11.5500	KRIPP1	mitochondrial RNA binding protein 1,mitochondrial edited mRNA stability factor 1,Mitochondrial poly(A) polymerase 1	94.96	20.1	0	21.027	1	1		1	-1.11434	0.00766839	2.1153	+	7.4	5	5	0.430515	-1.21586	10.926	4	9.4	5	5	0.529213	-0.918081	12.141	5	9.9	6	6	0.43255	-1.20906	7.6017	6
	525	Tb927.10.11260	Tb927.10.11260		hypothetical protein, conserved	22.384	27.3	0	8.3085	1	1			-1.10034	0.0169296	1.77135	+	27.3	3	3	0.457038	-1.12961	34.818	4	21.9	2	2	0.475964	-1.07108	9.1372	2	0	0	0	NaN		NaN	0
	331	Tb11.v5.0685;Tb927.8.3110	Tb11.v5.0685;Tb927.8.3110		hypothetical protein, conserved;hypothetical protein, conserved	38.639	26.7	0	20.817	2	1		1	-1.09681	0.00176572	2.75308	+	18	3	3	0.496549	-1.00999	12.941	3	24.1	4	4	0.445236	-1.16736	45.055	3	16	3	3	0.46231	-1.11307	125.26	3
	2998	Tb927.6.4930	Tb927.6.4930		hypothetical protein, conserved	30.051	30	0	16.888	1	1		1	-1.08964	0.00220091	2.6574	+	20.2	4	4	0.485343	-1.04292	24.372	5	30	5	5	0.488329	-1.03407	27.582	5	4.9	1	1	0.43772	-1.19192	NaN	1
	1853	Tb927.11.6700	Tb927.11.6700		hypothetical protein, conserved	15.205	11.4	0.0013587	2.7802	1	1		1	-1.08264	0.00372658	2.42869	+	11.4	1	1	0.464814	-1.10528	NaN	1	11.4	1	1	0.514695	-0.958212	NaN	1	11.4	1	1	0.44	-1.18442	NaN	1
	3172	Tb927.7.3590	Tb927.7.3590		hypothetical protein, conserved	16.847	23.2	0	31.392	1	1		1	-1.07725	0.00624328	2.20459	+	17.9	2	2	0.444188	-1.17076	17.598	5	17.9	2	2	0.449216	-1.15452	21.91	6	23.2	3	3	0.53349	-0.906467	55.441	6
	3559	Tb927.8.5280	Tb927.8.5280		hypothetical protein, conserved	28.693	30.4	0	10.411	1	1		1	-1.07577	0.00141304	2.84985	+	26.1	4	4	0.476145	-1.07053	20.124	4	24.9	4	4	0.497092	-1.00842	67.72	5	10.1	1	1	0.45114	-1.14835	6.8079	3
	1747	Tb927.11.4850	Tb927.11.4850		hypothetical protein, conserved	50.425	13.3	0	9.1408	1	1		1	-1.07563	0.00442165	2.35442	+	5.6	1	1	0.519346	-0.945233	NaN	1	11.1	3	3	0.437464	-1.19276	31.543	2	4.7	2	2	0.47012	-1.0889	187.77	2
	1268	Tb927.11.11470	Tb927.11.11470		hypothetical protein, conserved	32.022	32.6	0	15.239	1	1		1	-1.06667	0.00889164	2.05102	+	18.4	5	5	0.425967	-1.23119	32.158	7	32.6	8	8	0.542564	-0.882134	27.01	9	6.7	2	2	0.47084	-1.08669	83.81	3
	1610	Tb927.11.240	Tb927.11.240		hypothetical protein, conserved	114.06	8.8	0	20.919	1	1		1	-1.06197	0.00141757	2.84845	+	6.5	4	4	0.502462	-0.992913	24.13	4	7.7	5	5	0.479157	-1.06143	25.656	5	4.9	3	3	0.45642	-1.13157	21.858	3
	2215	Tb927.3.2370	Tb927.3.2370		hypothetical protein, conserved	15.403	27.6	0	6.7044	1	1			-1.04672	0.0251248	1.5999	+	27.6	2	2	0.489524	-1.03055	33.45	2	27.6	2	2	0.393004	-1.34738	17.731	2	27.6	2	2	0.58959	-0.762216	3.3464	2
	1211	Tb927.11.10400	Tb927.11.10400		hypothetical protein, conserved	21.238	22.9	0	7.3833	1	1		1	-1.04438	0.00179989	2.74476	+	16.2	3	3	0.479272	-1.06108	7.8692	4	22.9	4	4	0.462813	-1.1115	34.864	5	5.6	1	1	0.51386	-0.960553	NaN	1
	377	Tb927.1.1200	Tb927.1.1200	MRPS15	hypothetical protein, conserved	50.307	3	0	20.957	1	1		1	-1.03988	0.00106849	2.97123	+	3	1	1	0.504083	-0.988267	17.528	3	3	1	1	0.490629	-1.0273	NaN	1	3	1	1	0.4652	-1.10408	25.114	2
	3206	Tb927.7.4200	Tb927.7.4200		hypothetical protein, conserved	38.863	13	0	24.703	1	1		1	-1.03837	0.000489373	3.31036	+	4	1	1	0.490581	-1.02744	14.992	2	7.6	2	2	0.498206	-1.00518	21.921	3	9	3	3	0.47221	-1.0825	46.498	4
	3161	Tb927.7.3430	Tb927.7.3430	PPIase	cyclophilin-type peptidyl-prolyl cis-trans isomerase, putative (PPIase)	25.548	57.1	0	43.633	1	1		1	-1.03648	0.0102179	1.99064	+	43.7	6	6	0.423926	-1.23811	25.803	8	51.9	7	7	0.542859	-0.881351	25.385	11	11.7	2	2	0.50349	-0.989965	8.2296	3
	2952	Tb927.6.4070	Tb927.6.4070		hypothetical protein, conserved	29.319	33.7	0	29.003	1	1		1	-1.0281	0.000185293	3.73214	+	22.6	5	5	0.487829	-1.03555	8.5927	5	13.4	4	4	0.483723	-1.04775	57.169	4	17.2	3	3	0.49965	-1.00101	82.149	4
	4052	Tb927.9.7830	Tb927.9.7830		hypothetical protein, conserved	22.986	23.7	0	46.161	1	1			-1.02008	0.0205289	1.68763	+	23.7	6	6	0.583942	-0.776104	8.584	12	20.2	4	4	0.40935	-1.28859	9.7277	5	15.7	3	3	0.50155	-0.995535	9.1306	5
	1909	Tb927.11.8040	Tb927.11.8040		hypothetical protein, conserved	22.255	31.9	0	23.001	1	1		1	-1.0124	0.00684523	2.16461	+	31.9	4	4	0.44287	-1.17505	10.558	4	24.3	3	3	0.510908	-0.968865	8.2595	5	4.9	1	1	0.53838	-0.893303	3.2762	2
	978	Tb927.10.600	Tb927.10.600		hypothetical protein, conserved	62.775	32.3	0	40.793	1	1		1	-0.994169	0.0198552	1.70213	+	15.7	5	5	0.42294	-1.24147	13.769	6	25.3	9	9	0.502715	-0.992188	50.446	9	12.4	5	5	0.59508	-0.748844	111.06	6
	3399	Tb927.8.1890	Tb927.8.1890		cytochrome c1, heme protein, mitochondrial precursor	30.071	58.1	0	87.768	1	1			-0.992406	0.017351	1.76067	+	46.5	9	9	0.58572	-0.771716	13.034	20	58.1	9	9	0.426421	-1.22965	12.63	20	46.5	7	7	0.50844	-0.975851	59.694	11
	1012	Tb927.10.6850	Tb927.10.6850		mitochondrial RNA binding complex 1 subunit,mitochondrial edited mRNA stability factor 1 subunit,kinteoplast poly(A) polymerase complex 1 subunit	36.918	19.7	0	13.039	1	1		1	-0.98935	0.00440952	2.35561	+	15.9	4	4	0.462214	-1.11337	31.272	4	11.6	3	3	0.511902	-0.966061	12.265	3	3.4	1	1	0.54013	-0.888621	NaN	1
	905	Tb927.10.4080	Tb927.10.4080		hypothetical protein, conserved	127.1	29.2	0	43.269	1	1		1	-0.989118	0.00426243	2.37034	+	18.4	9	9	0.464835	-1.10521	13.713	13	25.6	11	11	0.506663	-0.980903	21.178	12	15.4	5	5	0.5429	-0.881242	69.33	7
	1499	Tb927.11.15850	Tb927.11.15850		kinteoplast poly(A) polymerase complex 1 subunit	86.756	12.1	0	22.345	1	1			-0.979831	0.00507932	2.29419	+	4.2	3	3	0.484426	-1.04565	6.4429	4	8.4	6	6	0.558753	-0.839718	92.953	6	5.6	4	4	0.48159	-1.05412	4.22	7
	1737	Tb927.11.4650	Tb927.11.4650		hypothetical protein, conserved	167.85	6.1	0	39.733	1	1		1	-0.97904	0.0104058	1.98273	+	5.5	5	5	0.445137	-1.16768	20.202	8	6.1	6	6	0.56494	-0.823831	10.903	6	3.4	3	3	0.51921	-0.94561	4.659	5
	1935	Tb927.11.870	Tb927.11.870		hypothetical protein, conserved	28.776	25.2	0	15.173	1	1		1	-0.972725	0.00345286	2.46182	+	25.2	5	5	0.500125	-0.999639	19.499	5	22	4	4	0.481047	-1.05575	17.955	4	8.1	2	2	0.54989	-0.862785	0.67705	3
	2382	Tb927.3.770	Tb927.3.770		hypothetical protein, conserved	21.212	35.4	0	7.2294	1	1		1	-0.970085	0.0486963	1.3125	+	25.4	3	3	0.375122	-1.41457	36.9	4	35.4	4	4	0.598158	-0.741402	38.876	6	9.4	1	1	0.59284	-0.754285	29.778	2
	1634	Tb927.11.270	Tb927.11.270	MCP10	mitochondrial carrier protein (MCP10)	33.969	5.8	0.0025887	2.1656	1	1	1		-0.960957	0.00713328	2.14671	+	5.8	2	2	0.52579	-0.927441	5.1532	2	5.8	2	2	0.558878	-0.839395	1.6794	2	3.2	1	1	0.46136	-1.11604	NaN	1
	3655	Tb927.8.6890	Tb927.8.6890		hypothetical protein, conserved	10.088	17	0	8.5678	1	1		1	-0.958989	0.0411909	1.3852	+	17	1	1	0.537057	-0.896853	5.1057	3	17	1	1	0.492732	-1.02112	2.6265	3	0	0	0	NaN		NaN	0
	215	Tb11.v5.0201;Tb927.10.6090	Tb11.v5.0201;Tb927.10.6090		tRNA pseudouridine synthase A, putative;tRNA pseudouridine synthase A, putative	69.188	4.5	0.00056513	3.2246	2	1		1	-0.936777	0.0319608	1.49538	+	0	0	0	NaN		NaN	0	4.5	2	2	0.539724	-0.889707	5.6875	2	1.9	1	1	0.50563	-0.983846	NaN	1
	1185	Tb927.11.10080	Tb927.11.10080		hypothetical protein, conserved	21.564	46.6	0	45.471	1	1		1	-0.934047	0.017336	1.76105	+	40.7	4	4	0.451957	-1.14574	27.745	4	46.6	5	5	0.609496	-0.714311	30.799	4	11.1	1	1	0.52048	-0.942085	NaN	1
	3224	Tb927.7.4710	Tb927.7.4710		hypothetical protein, conserved	33.994	10.5	0	9.131	1	1		1	-0.92465	0.00602285	2.2202	+	10.5	2	2	0.581159	-0.782996	5.4775	2	10.5	2	2	0.50971	-0.972252	22.58	2	3.7	1	1	0.49356	-1.0187	NaN	1
	3125	Tb927.7.2760	Tb927.7.2760		hypothetical protein, conserved	31.986	22.3	0	13.447	1	1		1	-0.923952	0.00670377	2.17368	+	18.3	5	5	0.48771	-1.03591	31.103	6	19.4	5	5	0.515092	-0.957097	6.2115	4	7.6	2	2	0.58283	-0.778853	5.5967	2
	2878	Tb927.6.2490	Tb927.6.2490		hypothetical protein, conserved	28.031	39.6	0	35.081	1	1		1	-0.919978	0.00625632	2.20368	+	33.3	6	6	0.481487	-1.05443	15.768	12	39.6	8	8	0.573164	-0.802979	12.519	12	30.8	6	6	0.53495	-0.902524	2.4677	9
	3920	Tb927.9.2620	Tb927.9.2620		hypothetical protein, conserved	76.723	4.7	0	12.217	1	1		1	-0.918175	0.000567703	3.24588	+	3.4	2	2	0.517572	-0.95017	22.505	2	3.4	2	2	0.525569	-0.928048	31.845	2	3.1	2	2	0.54476	-0.876307	6.2652	2
	412	Tb927.1.2730	Tb927.1.2730		hypothetical protein, conserved	38.735	33.3	0	34.545	1	1			-0.910284	0.00342699	2.46509	+	33.3	5	5	0.561798	-0.831877	10.975	7	13.8	2	2	0.495737	-1.01235	29.072	3	27.4	4	4	0.54088	-0.886619	14.805	4
	3999	Tb927.9.5960	Tb927.9.5960		succinate dehydrogenase, putative	21.281	65.4	0	16.612	1	1			-0.906256	0.0410273	1.38693	+	60.6	7	7	0.521485	-0.939302	18.207	14	54.3	8	8	0.430293	-1.21661	11.449	9	21.8	4	4	0.67696	-0.562858	21.5	4
	2857	Tb927.6.2080	Tb927.6.2080		hypothetical protein, conserved	45.886	25.5	0	23.219	1	1		1	-0.905942	0.00847961	2.07162	+	16.7	4	4	0.497859	-1.00619	18.895	8	25.5	6	6	0.599089	-0.739157	29.788	11	12.4	3	3	0.50963	-0.972478	34.593	4
	2097	Tb927.2.4890;Tb927.2.4740	Tb927.2.4890;Tb927.2.4740		ribosomal protein L11, putative;ribosomal protein L11, putative	40.186	19.6	0	25.475	2	1		1	-0.903126	0.0011189	2.95121	+	9.6	3	3	0.512794	-0.963548	6.2416	7	9.4	3	3	0.545256	-0.874994	16.281	7	14	4	4	0.54683	-0.870836	59.109	6
	378	Tb927.1.1210	Tb927.1.1210		hypothetical protein, conserved	16.902	6.2	0.0062641	1.7309	1	1		1	-0.900795	0.0351613	1.45393	+	6.2	1	1	0.424394	-1.23652	NaN	1	6.2	1	1	0.634276	-0.656817	NaN	1	6.2	1	1	0.57076	-0.809044	NaN	1
	3864	Tb927.9.15010	Tb927.9.15010		hypothetical protein, conserved	23.182	19.1	0	9.1152	1	1		1	-0.890648	0.0282735	1.54862	+	9.3	2	2	0.59004	-0.761115	11.001	2	19.1	4	4	0.609088	-0.715278	21.721	6	4.4	1	1	0.43662	-1.19555	21.93	2
	4037	Tb927.9.7190	Tb927.9.7190		oxidoreductase, putative	49.92	26.1	0	73.3	1	1		1	-0.878359	0.0385674	1.41378	+	26.1	7	7	0.435673	-1.19868	18.294	12	26.1	7	7	0.554232	-0.851439	19.825	11	16.9	4	4	0.66667	-0.584955	26.385	7
	1346	Tb927.11.1310	Tb927.11.1310	B5R	NADH-cytochrome b5 reductase, putative (B5R)	37.14	9.5	0	7.7294	1	1		1	-0.877077	0.0209168	1.6795	+	9.5	2	2	0.567956	-0.816149	17.287	3	9.5	2	2	0.619579	-0.690641	13.102	3	9.5	2	2	0.45868	-1.12444	3.0743	2
	2297	Tb927.3.4130	Tb927.3.4130		hypothetical protein, conserved	23.04	10.9	0	6.0299	1	1		1	-0.87008	0.00649854	2.18718	+	10.9	2	2	0.564398	-0.825216	7.1059	2	10.9	2	2	0.583669	-0.776778	5.5932	4	10.9	2	2	0.49715	-1.00825	12.939	4
	1161	Tb927.10.9760	Tb927.10.9760		alternative oxidase	39.673	15.4	0	11.605	1	1		1	-0.868745	0.0048265	2.31637	+	2	1	1	0.552608	-0.855671	NaN	1	5.4	2	2	0.507125	-0.979586	12.45	2	10	2	2	0.58602	-0.770978	NaN	1
	4015	Tb927.9.6510	Tb927.9.6510		hypothetical protein, conserved	75.135	12.8	0	12.493	1	1			-0.861937	0.0356124	1.4484	+	8.3	5	5	0.467355	-1.09741	17.191	6	11	7	7	0.517732	-0.949722	10.218	8	4.8	3	3	0.6884	-0.538681	41.723	5
	3635	Tb927.8.6530	Tb927.8.6530		hypothetical protein, conserved	41.897	14.2	0	9.4188	1	1		1	-0.858274	0.0133822	1.87347	+	12.1	3	3	0.526732	-0.92486	208.18	3	4.8	1	1	0.50388	-0.988848	NaN	1	2.2	1	1	0.63239	-0.661113	NaN	1
	1619	Tb927.11.2530	Tb927.11.2530		kinteoplast poly(A) polymerase complex 1 subunit,mitochondrial edited mRNA stability factor 1 subunit,mitochondrial RNA binding complex 1 subunit	84.864	16.3	0	44.788	1	1		1	-0.857673	0.00303804	2.51741	+	11.9	8	8	0.523451	-0.933875	16.636	11	12.7	9	9	0.586098	-0.770787	23.718	13	11.4	7	7	0.54777	-0.868358	19.512	11
	780	Tb927.10.1870	Tb927.10.1870		hypothetical protein, conserved	21.648	12.7	0	4.5985	1	1			-0.84478	0.0360881	1.44264	+	7.7	1	1	0.447347	-1.16053	NaN	1	7.7	1	1	0.586476	-0.769856	14.11	3	12.7	2	2	0.65795	-0.60395	2.9742	2
	1348	Tb927.11.13140	Tb927.11.13140	COXX	cytochrome oxidase subunit X (COXX)	13.672	37.9	0	111.78	1	1		1	-0.841866	0.0168726	1.77282	+	37.9	5	5	0.636132	-0.652601	8.0751	15	37.9	5	5	0.487615	-1.03619	16.968	12	37.1	4	4	0.55988	-0.83681	6.0404	13
	3932	Tb927.9.3170	Tb927.9.3170	COXV	cytochrome oxidase subunit V (COXV)	22.229	55.1	0	75.402	1	1		1	-0.841792	0.0423654	1.37299	+	55.1	8	8	0.6141	-0.703455	9.9372	25	44.9	6	6	0.436205	-1.19692	4.5264	22	44.9	6	6	0.64842	-0.625	14.314	12
	1320	Tb927.11.1250	Tb927.11.1250		kinteoplast poly(A) polymerase complex 1 subunit,mitochondrial edited mRNA stability factor 1 subunit	98.264	25.2	0	69.374	1	1		1	-0.836785	0.000907269	3.04226	+	18.9	9	9	0.564016	-0.826193	8.81	13	20.9	10	10	0.541565	-0.884793	18.08	13	13.3	5	5	0.5746	-0.79937	14.412	6
	2270	Tb927.3.3550	Tb927.3.3550		hypothetical protein, conserved	128.86	2.6	0	5.4489	1	1		1	-0.83593	0.0352558	1.45277	+	1	1	1	0.575341	-0.797511	NaN	1	1	1	1	0.669972	-0.577828	30.617	2	2.6	2	2	0.45614	-1.13245	2.6863	3
	2433	Tb927.4.1760	Tb927.4.1760		hypothetical protein, conserved	17.442	28	0	4.3585	1	1		1	-0.834426	0.045377	1.34316	+	22.9	2	2	0.625313	-0.67735	18.892	2	11.5	1	1	0.648593	-0.624616	NaN	1	5.1	1	1	0.43488	-1.20131	NaN	1
	3772	Tb927.9.11660	Tb927.9.11660		hypothetical protein, conserved	26.647	36.3	0	27.6	1	1			-0.833628	0.00271385	2.56641	+	17.3	2	2	0.593472	-0.752749	14.521	4	27.4	3	3	0.556235	-0.846232	19.239	4	26.1	3	3	0.53518	-0.901904	51.308	4
	2759	Tb927.5.4040	Tb927.5.4040		hypothetical protein, conserved	94.263	24.6	0	40.163	1	1		1	-0.82924	0.0303016	1.51853	+	16.3	10	10	0.460193	-1.11969	40.36	11	16.4	9	9	0.602518	-0.730923	27.206	10	11.3	7	7	0.643	-0.637109	62.73	6
	838	Tb927.10.2800	Tb927.10.2800		hypothetical protein, conserved	18.838	15.6	0	7.953	1	1		1	-0.81548	0.0362172	1.44108	+	15.6	2	2	0.613497	-0.704872	57.159	2	15.6	2	2	0.654493	-0.61155	66.581	3	8.8	1	1	0.45691	-1.13002	NaN	1
	1241	Tb927.11.10880	Tb927.11.10880		hypothetical protein, conserved	48.493	40.6	0	64.648	1	1		1	-0.812501	0.0344192	1.4632	+	24.4	7	7	0.459474	-1.12194	45.259	8	29	7	7	0.636578	-0.651591	17.846	8	11.1	3	3	0.63114	-0.663968	10.251	3
	1122	Tb927.10.8890	Tb927.10.8890		kinetoplast DNA-associated protein, putative	23.503	21.1	0	12.856	1	1		1	-0.801371	0.0126205	1.89892	+	16.3	3	3	0.613008	-0.706022	5.2314	7	16.3	3	3	0.609199	-0.715015	15.016	6	21.1	4	4	0.5059	-0.983076	59.761	7
	784	Tb927.10.1930	Tb927.10.1930		hypothetical protein, conserved	74.392	8	0	9.1253	1	1		1	-0.799651	0.00936272	2.0286	+	4.6	2	2	0.516983	-0.951811	6.7425	2	4.6	2	2	0.593472	-0.752749	16.899	2	3.4	2	2	0.61797	-0.694391	NaN	1
	3468	Tb927.8.3300	Tb927.8.3300		hypothetical protein, conserved	77.891	11.1	0	6.2273	1	1		1	-0.798354	0.01031	1.98674	+	3.8	2	2	0.52222	-0.937269	21.913	3	8.5	4	4	0.573	-0.803392	50.858	6	4.5	3	3	0.63534	-0.654399	14.326	2
	1222	Tb927.11.10570	Tb927.11.10570		hypothetical protein, conserved	39.513	37.5	0	31.001	1	1		1	-0.796635	0.0386935	1.41236	+	31.5	8	8	0.473238	-1.07936	22.627	10	34.8	9	9	0.578235	-0.790272	20.968	11	14.7	4	4	0.69724	-0.520273	56.583	5
	1187	Tb927.11.1010	Tb927.11.1010		chaperone protein DNAj, putative	41.739	18.6	0	16.111	1	1		1	-0.794965	0.0185856	1.73082	+	14.8	4	4	0.510152	-0.971001	47.898	6	14.3	4	4	0.566059	-0.820975	17.16	6	8.6	2	2	0.663	-0.592919	54.011	3
	3018	Tb927.6.610	Tb927.6.610		hypothetical protein, conserved	64.961	16.4	0	49.013	1	1		1	-0.793438	0.00800752	2.0965	+	16.4	6	6	0.523862	-0.932742	16.451	7	12.8	5	5	0.617132	-0.69635	16.911	5	4.8	2	2	0.5941	-0.751222	5.105	2
	2225	Tb927.3.2670	Tb927.3.2670		hypothetical protein, conserved	28.84	50.9	0	65.752	1	1		1	-0.792209	0.000448626	3.34812	+	50.9	10	10	0.564461	-0.825053	11.785	13	39	8	8	0.58651	-0.769772	16.081	10	45.7	8	8	0.58164	-0.781802	27.336	12
	2672	Tb927.5.2150	Tb927.5.2150		hypothetical protein, conserved	60.078	16.1	0	12.461	1	1		1	-0.791884	0.0090748	2.04216	+	14.4	5	5	0.554693	-0.850239	4.0068	6	8.5	3	3	0.5418	-0.884168	25.173	3	8.9	4	4	0.64116	-0.641244	21.077	7
	2944	Tb927.6.3930	Tb927.6.3930		hypothetical protein, conserved	49.246	20.7	0	13.364	1	1		1	-0.79082	0.0370719	1.43095	+	16.7	4	4	0.468494	-1.0939	39.573	5	15	4	4	0.612145	-0.708055	12.298	5	2.6	1	1	0.67338	-0.570507	NaN	1
	3134	Tb927.7.3030;Tb927.7.2990	Tb927.7.3030;Tb927.7.2990		hypothetical protein, conserved;hypothetical protein, conserved	35.572	19.1	0	10.873	2	1			-0.79072	0.0134384	1.87165	+	19.1	5	5	0.53775	-0.894992	9.3995	8	16.5	4	4	0.546717	-0.871134	26.427	7	3.6	1	1	0.657	-0.606035	5.6493	3
	2980	Tb927.6.4560	Tb927.6.4560		hypothetical protein, conserved	47.192	7.4	0	6.4767	1	1		1	-0.788703	0.0206447	1.68519	+	7.4	3	3	0.51725	-0.951066	4.4374	3	7.4	3	3	0.555216	-0.848878	5.9555	4	4.9	2	2	0.67541	-0.566165	32.573	2
	1867	Tb927.11.6980	Tb927.11.6980		hypothetical protein, conserved	68.158	42.7	0	69.975	1	1		1	-0.784359	0.0144588	1.83987	+	32.5	13	13	0.583976	-0.77602	18.09	17	26.7	12	12	0.516369	-0.953526	22.174	18	19.1	9	9	0.64908	-0.623532	22.373	12
	381	Tb927.1.1390	Tb927.1.1390		hypothetical protein, conserved	28.393	13.5	0	6.1664	1	1		1	-0.776977	0.00260339	2.58446	+	9.8	2	2	0.607238	-0.719665	5.678	2	13.5	3	3	0.553526	-0.853277	46.471	3	3.7	1	1	0.59132	-0.757989	NaN	1
	4065	Tb927.9.8290	Tb927.9.8290		hypothetical protein, conserved	25.114	31.7	0	8.5013	1	1		1	-0.770571	0.00997574	2.00106	+	31.7	5	5	0.527537	-0.922655	13.512	8	28.4	4	4	0.629287	-0.66821	15.774	5	16.1	3	3	0.60674	-0.72085	11.859	4
	2369	Tb927.3.5610	Tb927.3.5610		ribosomal protein L3 mitochondrial, putative	54.986	25.6	0	32.936	1	1		1	-0.768598	0.0216822	1.6639	+	15.9	4	4	0.50045	-0.998701	14.278	6	15.9	4	4	0.635082	-0.654985	24.868	6	18	5	5	0.63635	-0.652108	61.404	6
	2732	Tb927.5.3410	Tb927.5.3410		hypothetical protein, conserved	30.982	19	0	6.1098	1	1			-0.765768	0.0388502	1.41061	+	19	4	4	0.514218	-0.959548	18.989	6	19	4	4	0.543537	-0.879549	11.608	5	3	1	1	0.72789	-0.458208	NaN	1
	2301	Tb927.3.4210	Tb927.3.4210		hypothetical protein, conserved	192.82	4	0	7.3153	1	1		1	-0.764009	0.0483374	1.31572	+	1.9	2	2	0.462792	-1.11157	NaN	1	1.3	1	1	0.652997	-0.614851	NaN	1	0.7	1	1	0.67567	-0.565609	NaN	1
	231	Tb927.11.7290;Tb11.v5.0254	Tb927.11.7290;Tb11.v5.0254		pantothenate kinase subunit, putative;pantothenate kinase subunit, putative	162.1	42.4	0	178.15	2	1		1	-0.763788	0.0409843	1.38738	+	31.4	31	31	0.545048	-0.875544	14.271	47	30.9	28	28	0.51164	-0.9668	15.297	41	26.7	28	28	0.73254	-0.449021	43.104	39
	927	Tb927.10.4880	Tb927.10.4880		hypothetical protein, conserved	25.965	31.7	0	14.171	1	1		1	-0.762387	0.0475505	1.32285	+	31.7	4	4	0.700035	-0.514501	6.0504	6	31.7	4	4	0.46845	-1.09403	7.8572	6	26.3	3	3	0.62476	-0.678626	12.442	6
	1423	Tb927.11.14380	Tb927.11.14380	KPAF2	kinetoplast polyadenylation/uridylation factor 2	72.496	17.7	0	18.204	1	1		1	-0.761512	0.0381254	1.41879	+	12.4	7	7	0.538503	-0.892974	7.4329	8	10.3	6	6	0.728863	-0.45628	20.245	6	8.4	4	4	0.52294	-0.935283	1.0253	4
	2581	Tb927.4.5120	Tb927.4.5120		hypothetical protein, conserved	155.28	12	0	23.045	1	1		1	-0.760497	0.0432982	1.36353	+	10.3	4	4	0.628377	-0.670297	4.4578	4	1.2	2	2	0.473687	-1.07799	15.215	2	4.2	4	4	0.69102	-0.533201	66.039	5
	2839	Tb927.6.1840	Tb927.6.1840		hypothetical protein, conserved	36.741	10.5	0	5.9933	1	1		1	-0.759815	0.0252673	1.59744	+	10.5	3	3	0.661026	-0.597221	11.113	2	7.3	2	2	0.623752	-0.680954	37.797	3	4.4	1	1	0.49956	-1.00127	NaN	1
	909	Tb927.10.4220	Tb927.10.4220		hypothetical protein, conserved	34.243	25.9	0	19.865	1	1		1	-0.753448	0.0104489	1.98093	+	25.9	5	5	0.555926	-0.847035	17.427	6	16.5	4	4	0.568828	-0.813935	18.468	4	14.9	2	2	0.66004	-0.599375	16.941	2
	1873	Tb927.11.7070	Tb927.11.7070		ATP-dependent DEAD/H RNA helicase, putative	60.825	7.5	0.001365	2.8292	1	1		1	-0.752481	0.0354589	1.45027	+	7.5	3	3	0.611098	-0.710525	33.544	3	7.5	3	3	0.576568	-0.794437	4.1034	4	0	0	0	NaN		NaN	0
	3424	Tb927.8.2300	Tb927.8.2300		hypothetical protein, conserved	25.468	34.8	0	14.767	1	1			-0.751523	0.0157986	1.80138	+	27.1	5	5	0.604961	-0.725087	19.938	6	14.5	3	3	0.52532	-0.92873	37.407	3	12.7	2	2	0.65941	-0.600752	26.315	2
	2203	Tb927.3.2180	Tb927.3.2180		hypothetical protein, conserved	17.908	45.5	0	154.46	1	1		1	-0.747887	0.00086054	3.06523	+	41	3	3	0.593472	-0.752749	0.61072	15	41	3	3	0.581058	-0.783247	7.0247	12	45.5	4	4	0.61231	-0.707666	22.175	11
	531	Tb927.10.11350	Tb927.10.11350		hypothetical protein, conserved	16.667	23.3	0	6.3136	1	1		1	-0.745746	0.0118679	1.92563	+	9	1	1	0.540044	-0.88885	NaN	1	23.3	2	2	0.5973	-0.743472	10.532	3	9	1	1	0.65751	-0.604915	NaN	1
	2053	Tb927.2.3180;Tb11.v5.0782	Tb927.2.3180;Tb11.v5.0782	KPAF1	kinetoplast polyadenylation/uridylation factor 1 (PPR1);hypothetical protein, conserved	114.38	40.7	0	106.62	2	1		1	-0.744464	0.00106826	2.97132	+	34.5	27	27	0.597122	-0.743903	18.572	36	31.4	25	25	0.614477	-0.702569	19.932	31	22.5	18	18	0.57958	-0.78692	51.409	20
	1368	Tb927.11.13510	Tb927.11.13510		hypothetical protein, conserved	20.104	21.7	0	12.646	1	1			-0.744189	0.0171607	1.76547	+	21.7	3	3	0.521132	-0.94028	16.513	7	21.7	3	3	0.648172	-0.625551	16.553	6	16.7	2	2	0.62993	-0.666737	19.427	3
	2173	Tb927.3.1690	Tb927.3.1690		hypothetical protein, conserved	17.154	76.6	0	36.757	1	1		1	-0.739313	0.00596896	2.2241	+	66.9	11	11	0.629802	-0.667029	11.069	19	62.1	10	10	0.553771	-0.852638	30.755	18	66.9	11	11	0.61631	-0.698272	26.676	13
	1432	Tb927.11.14570	Tb927.11.14570		hypothetical protein, conserved	46.609	15.5	0	12.462	1	1		1	-0.735356	0.0194384	1.71134	+	9.9	3	3	0.568214	-0.815493	28.183	2	6.3	2	2	0.693049	-0.528971	18.143	2	5.6	2	2	0.55034	-0.861605	59.516	3
	3554	Tb927.8.5200	Tb927.8.5200		hypothetical protein, conserved	201.55	4.6	0	17.631	1	1		1	-0.731675	0.0108865	1.96311	+	3.1	4	4	0.669882	-0.578021	10.716	4	4	5	5	0.574218	-0.800331	20.037	5	1.5	2	2	0.56775	-0.816672	NaN	1
	241	Tb927.7.4550;Tb11.v5.0268	Tb927.7.4550;Tb11.v5.0268		60S ribosomal protein-like;60S ribosomal protein-like, putative	19.423	40.4	0	26.792	2	1		1	-0.729719	0.0174842	1.75736	+	40.4	4	4	0.535389	-0.90134	4.5995	10	40.4	4	4	0.604961	-0.725087	7.1217	11	40.4	4	4	0.67702	-0.562729	5.685	9
	942	Tb927.10.520	Tb927.10.520		hypothetical protein, conserved	46.781	47.5	0	226.42	1	1			-0.719636	0.00308193	2.51118	+	47.5	19	19	0.614251	-0.703101	7.0729	44	46	18	18	0.576037	-0.795767	9.4311	45	38.1	13	13	0.63286	-0.660042	13.219	31
	959	Tb927.10.5660	Tb927.10.5660		heat shock protein, putative	37.873	16.1	0	15.152	1	1		1	-0.719479	0.0207778	1.6824	+	16.1	4	4	0.528457	-0.920141	13.301	8	14	3	3	0.676682	-0.563451	1.5486	5	11.3	3	3	0.6264	-0.674844	16.149	5
	2926	Tb927.6.3530	Tb927.6.3530		hypothetical protein, conserved	30.913	18.2	0	9.9237	1	1			-0.715435	0.0497708	1.30303	+	12.9	2	2	0.486689	-1.03893	1.3535	2	15.4	3	3	0.711997	-0.490057	23.258	3	8.2	2	2	0.65188	-0.617322	15.417	2
	2634	Tb927.5.1310	Tb927.5.1310		protoheme IX farnesyltransferase, putative	40.298	11.3	0.0013714	2.8755	1	1		1	-0.713221	0.0482394	1.3166	+	4	1	1	0.602446	-0.731096	NaN	1	7.3	2	2	0.745823	-0.423094	91.116	2	4	1	1	0.50506	-0.985473	9.3112	2
	320	Tb927.10.380;Tb11.v5.0637	Tb927.10.380;Tb11.v5.0637	PPR5	mitochondrial RNA binding complex 1 subunit (PPR5);hypothetical protein, conserved	39.683	21.9	0	20.02	2	1		1	-0.712005	0.024698	1.60734	+	17.8	4	4	0.522466	-0.936591	18.748	7	19.6	4	4	0.644413	-0.633943	38.077	9	9.9	2	2	0.67573	-0.565481	62.12	3
	2854	Tb927.6.2010	Tb927.6.2010		hypothetical protein, conserved	58.952	59.1	0	127.62	1	1		1	-0.711506	0.011649	1.93371	+	55.8	21	21	0.578871	-0.788686	25.237	38	56.4	21	21	0.578637	-0.78927	25.613	36	30.8	13	13	0.67992	-0.556563	9.6172	15
	3555	Tb927.8.5220	Tb927.8.5220		hypothetical protein, conserved	114.05	15.6	0	21.454	1	1		1	-0.71128	0.00629806	2.20079	+	12.7	9	9	0.58401	-0.775935	36.866	11	12.9	9	9	0.590633	-0.759667	10.342	10	6.2	4	4	0.66056	-0.598238	20.771	5
	937	Tb927.10.5050	Tb927.10.5050		hypothetical protein, conserved	8.6908	29.3	0	15.093	1	1		1	-0.69879	0.0158903	1.79887	+	29.3	2	2	0.647752	-0.626486	7.363	7	29.3	2	2	0.54484	-0.876095	23.036	7	29.3	2	2	0.6626	-0.59379	8.5765	5
	926	Tb927.10.4850	Tb927.10.4850		hypothetical protein, conserved	51.34	42.2	0	61.645	1	1		1	-0.698026	0.00262931	2.58016	+	38.1	13	13	0.586992	-0.768587	13.551	24	38.1	13	13	0.636578	-0.651591	22.082	23	32.2	11	11	0.62681	-0.6739	40.254	15
	2400	Tb927.4.1070	Tb927.4.1070		50S ribosomal protein L13, putative	24.299	34.7	0	15.927	1	1		1	-0.694604	0.00466728	2.33094	+	34.7	4	4	0.581497	-0.782157	16.033	4	26.2	3	3	0.622743	-0.683292	0.74955	3	3.5	1	1	0.65141	-0.618362	NaN	1
	2101	Tb927.2.4830	Tb927.2.4830		TFIIF-stimulated CTD phosphatase, putative	38.807	17.6	0	17.079	1	1		1	-0.690405	0.00706884	2.15065	+	17.6	5	5	0.593437	-0.752834	34.321	6	10.1	3	3	0.596837	-0.744592	58.846	3	12.5	3	3	0.67185	-0.573789	24.108	5
	3703	Tb927.8.8170	Tb927.8.8170	MRB8170	mitochondrial RNA binding protein 1, putative (MRB8170)	100.4	24.1	0	66.692	1	1		1	-0.686636	0.0110228	1.95771	+	18.9	12	9	0.568861	-0.813853	15.996	14	16.8	10	8	0.677323	-0.562084	9.4931	12	17.8	11	9	0.62245	-0.68397	55.182	7
	3398	Tb927.8.1880	Tb927.8.1880		hypothetical protein, conserved	22.189	5.8	0.0052977	1.8059	1	1		1	-0.68634	0.00214612	2.66834	+	5.8	1	1	0.649266	-0.623118	NaN	1	5.8	1	1	0.605144	-0.72465	NaN	1	5.8	1	1	0.61079	-0.711252	5.6127	2
	3332	Tb927.7.740	Tb927.7.740		chaperone protein DNAj, putative	61.973	13.7	0	31.819	1	1		1	-0.686134	0.0263693	1.5789	+	12.2	4	4	0.606097	-0.722379	14.142	5	10.6	3	3	0.72015	-0.473631	18.069	3	8.8	3	3	0.55004	-0.862392	8.9616	3
	1447	Tb927.11.14980	Tb927.11.14980		hypothetical protein, conserved	58.419	20.9	0	16.375	1	1		1	-0.685169	0.0194408	1.71129	+	18.1	6	6	0.557724	-0.842376	24.722	8	15.4	5	5	0.613497	-0.704872	19.596	7	10.1	3	3	0.70307	-0.50826	47.642	7
	3366	Tb927.8.1240	Tb927.8.1240		electron transfer flavoprotein-ubiquinone oxidoreductase, putative	62.374	12.9	0	21.846	1	1			-0.684949	0.000673694	3.17154	+	10.8	3	3	0.609051	-0.715366	7.0489	5	10.8	3	3	0.621697	-0.685716	5.4759	7	4.3	2	2	0.63562	-0.653764	16.076	3
	714	Tb927.10.14860	Tb927.10.14860		hypothetical protein, conserved	83.434	18.4	0	54.236	1	1		1	-0.684321	0.0224109	1.64954	+	9.5	5	5	0.542947	-0.881116	9.2041	5	15.4	8	8	0.639345	-0.645333	7.1656	11	9.7	6	6	0.69423	-0.526514	41.921	6
	2756	Tb927.5.3980	Tb927.5.3980		hypothetical protein, conserved	43.71	34.2	0	35.865	1	1		1	-0.682628	0.00471153	2.32684	+	28.1	7	7	0.58418	-0.775514	31.505	8	24.9	6	6	0.637755	-0.648926	28.998	9	23.8	7	7	0.64912	-0.623443	42.983	10
	775	Tb927.10.1730	Tb927.10.1730		hypothetical protein, conserved	39.265	45.4	0	46.991	1	1		1	-0.677254	0.00300937	2.52153	+	38.4	9	9	0.644704	-0.633292	24.671	13	45.4	11	11	0.638529	-0.647176	31.31	15	21	5	5	0.59407	-0.751295	6.9812	6
	3583	Tb927.8.5640	Tb927.8.5640		hypothetical protein, conserved	37.089	50.5	0	64.261	1	1		1	-0.676481	0.034275	1.46502	+	50.5	12	12	0.575142	-0.798009	16.745	23	50.5	12	12	0.569606	-0.811964	18.367	19	43.8	10	10	0.7477	-0.419469	23.681	18
	3149	Tb927.7.3280	Tb927.7.3280		translation initiation factor IF-2, putative	79.66	21.8	0	27.187	1	1			-0.673651	0.0473029	1.32511	+	21.8	9	9	0.50844	-0.97585	35.298	12	21.8	9	9	0.68278	-0.550507	32.704	13	8	4	4	0.70976	-0.494597	35.982	6
	3345	Tb927.7.870	Tb927.7.870		hypothetical protein, conserved	40.532	14.9	0	9.294	1	1		1	-0.673592	0.0287599	1.54121	+	8	2	2	0.623403	-0.681764	11.591	2	14.9	4	4	0.723275	-0.467384	8.2405	4	6.1	2	2	0.54653	-0.871627	NaN	1
	1967	Tb927.11.9360	Tb927.11.9360		prenyltransferase, putative	54.515	17.6	0	11.568	1	1		1	-0.671813	0.0229679	1.63888	+	4.7	2	2	0.579777	-0.786429	16.37	2	15.1	4	4	0.588859	-0.764006	76.573	7	4.7	2	2	0.72447	-0.465002	65.46	2
	914	Tb927.10.430	Tb927.10.430		hypothetical protein, conserved	41.585	28.2	0	37.641	1	1		1	-0.669617	0.0118572	1.92602	+	26	6	6	0.573691	-0.801655	13.936	9	23.3	5	5	0.632951	-0.659833	16.075	7	20.4	4	4	0.68427	-0.547362	53.924	5
	1644	Tb927.11.2920	Tb927.11.2920		glycerolphosphate mutase, putative	33.71	6.5	0	4.3481	1	1		1	-0.660799	0.0450592	1.34622	+	6.5	2	2	0.724008	-0.465922	32.581	2	6.5	2	2	0.672812	-0.571725	6.2541	2	6.5	2	2	0.51952	-0.944749	32.075	2
	2860	Tb927.6.2140	Tb927.6.2140		hypothetical protein, conserved	28.771	53.9	0	55.738	1	1		1	-0.659268	0.00844919	2.07319	+	45.7	8	8	0.599377	-0.738465	7.2744	10	44.9	8	8	0.688089	-0.539333	17.548	12	35.2	7	7	0.61557	-0.700005	8.2815	8
	3002	Tb927.6.4990	Tb927.6.4990		ATP synthase, epsilon chain, putative	20.147	73.1	0	142.57	1	1		1	-0.65298	0.00418425	2.37838	+	73.1	11	11	0.600456	-0.735869	26.087	29	73.1	11	11	0.661463	-0.596267	19.694	31	66.5	10	10	0.64761	-0.626803	30.799	34
	1077	Tb927.10.8030	Tb927.10.8030		hypothetical protein, conserved	28.834	51.8	0	160.82	1	1		1	-0.652036	0.00186294	2.7298	+	50.6	15	15	0.615953	-0.699107	8.8707	38	47.1	14	14	0.634921	-0.655352	5.085	33	47.8	13	13	0.659	-0.60165	11.605	26
	3240	Tb927.7.5280	Tb927.7.5280		hypothetical protein, conserved	220.21	0.8	0	4.0403	1	1		1	-0.649731	0.0184388	1.73427	+	0.8	1	1	0.62461	-0.678973	NaN	1	0.8	1	1	0.715871	-0.482229	5.367	2	0.8	1	1	0.57915	-0.787991	4.1312	2
	864	Tb927.10.3250;Tb11.v5.0824	Tb927.10.3250		hypothetical protein, conserved	35.309	13.7	0	3.9852	2	1		1	-0.646191	0.00513963	2.28907	+	13.7	3	3	0.636659	-0.651408	16.644	3	0	0	0	NaN		NaN	0	2.3	1	1	0.64128	-0.640974	NaN	1
	3844	Tb927.9.14050	Tb927.9.14050		hypothetical protein, conserved	58.727	14.9	0	12.26	1	1			-0.645222	0.0159145	1.79821	+	7.6	3	3	0.708416	-0.497331	18.776	3	9	4	4	0.581531	-0.782073	8.1062	4	11.3	5	5	0.63452	-0.656262	16.203	6
	2810	Tb927.6.1200	Tb927.6.1200		hypothetical protein, conserved	52.96	42.3	0	65.362	1	1			-0.64359	0.024464	1.61147	+	32.9	9	9	0.591436	-0.757706	23.395	13	31.8	9	9	0.737681	-0.438932	25.211	12	17.9	5	5	0.60118	-0.734131	3.7346	6
	1973	Tb927.11.9450	Tb927.11.9450	PPIase	cyclophilin type peptidyl-prolyl cis-trans isomerase, putative (PPIase)	20.52	44.7	0	64.596	1	1			-0.642537	0.0129922	1.88632	+	37.9	4	4	0.702889	-0.508632	19.972	9	37.9	4	4	0.588893	-0.763921	11.141	8	28.9	4	4	0.63505	-0.655058	20.322	3
	1986	Tb927.11.9670	Tb927.11.9670	GCVT1	glycine synthase, putative (GCVT1)	41.142	32.5	0	56.905	1	1		1	-0.639619	0.0378135	1.42235	+	30.1	8	8	0.604412	-0.726395	11.389	12	32.5	9	9	0.764409	-0.387583	11.576	12	25.9	7	7	0.57241	-0.804879	9.4145	9
	1738	Tb927.11.4680	Tb927.11.4680		hypothetical protein, conserved	40.02	37	0	30.115	1	1		1	-0.637003	0.02438	1.61297	+	34.4	7	7	0.563127	-0.828469	16.631	8	29.8	6	6	0.715103	-0.483777	15.566	10	19.1	5	5	0.66032	-0.598763	7.2901	6
	385	Tb927.1.1580	Tb927.1.1580		cytochrome c oxidase assembly factor, putative,electron transport protein SCO1/2, putative	33.578	26.9	0	19.07	1	1		1	-0.634611	0.0176489	1.75328	+	26.9	6	6	0.623675	-0.681134	15.748	8	19.9	4	4	0.722491	-0.468948	17.955	4	11	3	3	0.59306	-0.75375	60.974	3
	3807	Tb927.9.12770	Tb927.9.12770		hypothetical protein, conserved	116.54	28.8	0	49.116	1	1		1	-0.633381	0.0164089	1.78492	+	24.6	15	15	0.577868	-0.791189	33.354	18	21.8	13	13	0.662471	-0.594071	20.124	16	15	10	10	0.69985	-0.514882	48.589	11
	1536	Tb927.11.16480	Tb927.11.16480		enoyl-CoA hydratase/isomerase family protein, putative	40.234	70.2	0	160.7	1	1		1	-0.632823	0.0151049	1.82088	+	63.8	16	16	0.690512	-0.534261	9.0479	34	63.3	15	15	0.670871	-0.575893	5.48	28	48.3	14	14	0.57902	-0.788315	5.7143	28
	890	Tb927.10.3770	Tb927.10.3770		predicted TPR repeat protein	78.604	19.1	0	50.458	1	1			-0.631412	0.0158114	1.80103	+	14.3	7	7	0.577834	-0.791272	23.354	14	15.9	8	8	0.689085	-0.537246	8.4109	15	14.6	6	6	0.67562	-0.565716	7.0943	13
	2704	Tb927.5.2930	Tb927.5.2930		hypothetical protein, conserved	43.308	64.3	0	323.31	1	1		1	-0.63087	0.00208741	2.68039	+	64.1	32	32	0.671682	-0.57415	21.196	78	62.2	32	32	0.629129	-0.668573	27.193	64	55.9	25	25	0.63733	-0.649888	37.137	66
	1191	Tb927.11.10140	Tb927.11.10140		hypothetical protein, conserved	30.3	57.2	0	30.48	1	1		1	-0.627235	0.00596745	2.22421	+	54.3	10	10	0.628338	-0.670387	25.095	16	41.6	8	8	0.623636	-0.681224	20.69	12	25.7	6	6	0.69251	-0.530093	41.84	7
	289	Tb927.10.660;Tb11.v5.0500	Tb927.10.660;Tb11.v5.0500		2-oxoisovalerate dehydrogenase alpha subunit, putative;2-oxoisovalerate dehydrogenase alpha subunit, putative	46.369	54.3	0	101.69	2	1		1	-0.623539	0.00124937	2.90331	+	46.4	14	14	0.657635	-0.604641	14.746	25	51	15	15	0.660458	-0.59846	14.987	22	30.3	10	10	0.62959	-0.667515	47.383	17
	2683	Tb927.5.2430	Tb927.5.2430		membrane transporter protein, putative	56.733	8	0	22.421	1	1			-0.622558	0.0378157	1.42233	+	8	4	4	0.599952	-0.737081	16.994	5	7.8	3	3	0.591716	-0.757023	20.135	6	7.8	3	3	0.77187	-0.37357	14.35	3
	1661	Tb927.11.3260	Tb927.11.3260	POLID	mitochondrial DNA polymerase I protein D, putative (POLID)	182.88	6.1	0	19.519	1	1		1	-0.622008	0.0163359	1.78686	+	3.9	5	5	0.710177	-0.49375	9.3737	5	4.6	5	5	0.658892	-0.601887	36.656	6	4.4	6	6	0.58626	-0.770387	32.819	5
	1332	Tb927.11.1270	Tb927.11.1270		hypothetical protein, conserved	20.267	52.1	0	135.89	1	1			-0.620496	0.0119582	1.92233	+	44.4	9	9	0.65475	-0.610983	14.454	17	52.1	10	10	0.597265	-0.743558	29.558	18	46.2	7	7	0.70371	-0.506947	31.371	13
	2862	Tb927.6.2190	Tb927.6.2190		hypothetical protein, conserved	31.531	27.9	0	18.286	1	1		1	-0.6174	0.0336141	1.47348	+	18.5	4	4	0.637267	-0.650029	24.277	6	23.7	5	5	0.666756	-0.58477	15.636	11	0	0	0	NaN		NaN	0
	495	Tb927.10.10420	Tb927.10.10420		monothiol glutaredoxin, putative	14.888	42	0	60.391	1	1		1	-0.613842	0.0137474	1.86178	+	42	4	4	0.590982	-0.758815	5.1564	8	42	4	4	0.691994	-0.531169	9.8939	7	29	3	3	0.68229	-0.551543	2.6825	9
	418	Tb927.1.3030	Tb927.1.3030	KREL2	KREL2 (KREL2)	47.576	20.4	0	10.134	1	1		1	-0.609669	0.0049893	2.30196	+	18	4	4	0.673355	-0.57056	28.233	4	18	4	4	0.617284	-0.695994	39.595	4	15.1	4	4	0.67715	-0.562453	70.137	4
	2059	Tb927.2.3610	Tb927.2.3610		hypothetical protein, conserved	16.06	56.2	0	191.33	1	1			-0.608584	0.0186786	1.72866	+	56.2	7	7	0.611583	-0.709379	24.903	23	56.2	7	7	0.626174	-0.675364	11.712	25	56.2	7	7	0.73662	-0.441008	6.0208	18
	4097	Tb927.9.9420	Tb927.9.9420		hypothetical protein, conserved	34.928	14.4	0	19.867	1	1			-0.607787	0.0388469	1.41064	+	11.5	2	2	0.553894	-0.852319	2.1369	3	6.1	1	1	0.72881	-0.456386	1.1581	2	9	2	2	0.69996	-0.514656	52.547	3
	259	Tb927.10.5060;Tb11.v5.0341	Tb927.10.5060;Tb11.v5.0341		hypothetical protein, conserved;hypothetical protein, conserved	21.332	8	0.0016164	2.6513	2	1			-0.607162	0.0319474	1.49557	+	8	1	1	0.642756	-0.637657	6.8525	3	8	1	1	0.670511	-0.576667	9.4371	2	0	0	0	NaN		NaN	0
	269	Tb927.10.16170;Tb11.v5.0396	Tb927.10.16170;Tb11.v5.0396		potassium voltage-gated channel, putative;potassium voltage-gated channel, putative	34.606	27.4	0	20.111	2	1		1	-0.607084	0.0350048	1.45587	+	16	4	4	0.559942	-0.836651	16.819	5	23.8	6	6	0.693289	-0.528471	8.7407	8	4.9	1	1	0.72894	-0.456128	16.857	2
	3804	Tb927.9.12720	Tb927.9.12720		predicted zinc finger protein	42.982	10.5	0.0013583	2.7777	1	1		1	-0.604715	0.00931404	2.03086	+	6.4	2	2	0.611322	-0.709996	27.449	6	6.4	2	2	0.703779	-0.506805	15.936	3	7.7	2	2	0.66097	-0.597343	46.307	5
	2418	Tb927.4.1500	Tb927.4.1500	REH2	RNA editing associated helicase 2 (REH2)	241.82	16.7	0	121.72	1	1		1	-0.600529	0.0243791	1.61298	+	12.1	15	15	0.635203	-0.65471	17.259	19	12.9	16	16	0.750131	-0.414785	27.002	21	6.2	8	8	0.60203	-0.732093	21.935	8
	3222	Tb927.7.4620	Tb927.7.4620		hypothetical protein, conserved	32.677	17.1	0	11.061	1	1		1	-0.599344	0.0145532	1.83704	+	13.1	2	2	0.613648	-0.704518	14.111	4	17.1	3	3	0.72759	-0.458802	130.23	3	9.8	2	2	0.64407	-0.634711	113.19	3
	3733	Tb927.9.10470	Tb927.9.10470		hypothetical protein, conserved	46.829	21.9	0	18.291	1	1			-0.597316	0.012781	1.89343	+	20	7	7	0.603573	-0.728399	32.432	10	16.7	6	6	0.67627	-0.564329	5.048	8	20.2	8	8	0.70749	-0.499218	37.907	11
	3016	Tb927.6.590	Tb927.6.590		hypothetical protein, conserved	12.277	48	0	75.964	1	1			-0.596012	0.0235519	1.62797	+	48	3	3	0.752729	-0.409798	35.658	6	48	3	3	0.621427	-0.686344	57.841	6	32.7	2	2	0.61904	-0.691895	57.237	3
	3803	Tb927.9.12710	Tb927.9.12710		hypothetical protein, conserved	44.783	2.3	0.0033462	2.0922	1	1		1	-0.595088	0.0246438	1.60829	+	2.3	1	1	0.58548	-0.772308	12.929	2	2.3	1	1	0.733945	-0.446256	12.685	2	2.3	1	1	0.67516	-0.566699	NaN	1
	3773	Tb927.9.11720	Tb927.9.11720		Iron-sulfur cluster assembly protein	19.436	52.8	0	125.1	1	1			-0.594645	0.0254382	1.59451	+	46.1	6	6	0.579441	-0.787265	7.4248	19	52.8	7	7	0.700624	-0.513289	9.5472	16	35.6	5	5	0.7153	-0.48338	7.4378	11
	2186	Tb927.3.1890	Tb927.3.1890		cytochrome c oxidase assembly protein, putative	33.231	6	0	6.1425	1	1			-0.594318	0.0200926	1.69696	+	6	1	1	0.60931	-0.714751	NaN	1	6	1	1	0.642013	-0.639325	NaN	1	6	1	1	0.74284	-0.428877	NaN	1
	1941	Tb927.11.8800	Tb927.11.8800		hypothetical protein, conserved	30.621	25.3	0	19.354	1	1		1	-0.594255	0.00558928	2.25264	+	8.7	2	2	0.630159	-0.666211	6.8788	7	25.3	5	5	0.700967	-0.512581	0.94276	12	15.5	3	3	0.65794	-0.603972	19.816	7
	3182	Tb927.7.3810	Tb927.7.3810		hypothetical protein, conserved	41.685	30.4	0	35.642	1	1		1	-0.593869	0.0196415	1.70683	+	30.4	10	10	0.68348	-0.549028	21.841	21	30.4	10	10	0.591576	-0.757365	13.166	18	30.2	9	9	0.71936	-0.475214	25.3	18
	2708	Tb927.5.3010;Tb11.v5.0691	Tb927.5.3010;Tb11.v5.0691	mrb3010	MRB1-associated protein, putative,guide RNA binding protein, putative;hypothetical protein, conserved	57.748	49.4	0	67.233	2	1		1	-0.592243	0.0385564	1.4139	+	40.7	15	15	0.58072	-0.784085	23.357	21	35.5	13	13	0.650406	-0.620586	20.6	21	18.4	6	6	0.77268	-0.372057	4.6297	9
	3576	Tb927.8.5560	Tb927.8.5560		hypothetical protein, conserved	59.988	25.1	0	31.635	1	1		1	-0.591997	0.0460963	1.33633	+	12.4	5	5	0.689941	-0.535456	11.35	7	22.3	8	8	0.759186	-0.397474	33.894	9	15	5	5	0.55746	-0.84306	45.971	7
	4034	Tb927.9.7150	Tb927.9.7150		RNA pseudouridylate synthase protein, putative	140.81	2.6	0	3.8758	1	1			-0.591471	0.0231249	1.63592	+	2.6	3	3	0.673627	-0.569977	44.862	3	1.6	2	2	0.653851	-0.612966	NaN	1	0	0	0	NaN		NaN	0
	280	Tb927.10.10310;Tb11.v5.0446	Tb927.10.10310;Tb11.v5.0446		hypothetical protein, conserved;hypothetical protein, conserved	53.184	2.9	0.00055975	3.1093	2	1		1	-0.59053	0.000413138	3.3839	+	2.9	1	1	0.664275	-0.590147	NaN	1	2.9	1	1	0.663922	-0.590913	NaN	1	0	0	0	NaN		NaN	0
	814	Tb927.10.2350	Tb927.10.2350		pyruvate dehydrogenase complex E3 binding protein, putative	27.335	52.7	0	151.91	1	1			-0.589831	4.71063e-05	4.32692	+	52.7	9	9	0.66538	-0.587749	22.283	14	52.7	9	9	0.667067	-0.584097	15.144	15	36.5	7	7	0.66083	-0.597649	48.602	12
	763	Tb927.10.15830	Tb927.10.15830		hypothetical protein, conserved	29.207	19.5	0.0016116	2.6335	1	1			-0.589666	0.002484	2.60485	+	19.5	3	3	0.663438	-0.591967	236.63	3	13.9	2	2	0.665557	-0.587365	1.6371	2	0	0	0	NaN		NaN	0
	824	Tb927.10.2550	Tb927.10.2550		malate dehydrogenase-related	38.998	32.8	0	42.919	1	1		1	-0.587443	0.0074268	2.1292	+	28.9	6	6	0.620232	-0.68912	17.455	6	19.3	4	4	0.691611	-0.531968	6.5464	5	12.6	3	3	0.68718	-0.54124	23.181	3
	1168	Tb927.10.9830	Tb927.10.9830		hypothetical protein, conserved	17.194	60.5	0	277.83	1	1			-0.583745	0.00952195	2.02127	+	60.5	8	8	0.625274	-0.677441	9.894	27	60.5	8	8	0.662383	-0.594262	8.7421	20	60.5	8	8	0.71721	-0.479533	16.236	19
	2711	Tb927.5.3090	Tb927.5.3090		hypothetical protein, conserved	11.655	75.2	0	128.82	1	1			-0.579223	0.0118544	1.92612	+	65.3	5	5	0.685542	-0.544683	10.424	20	65.3	5	5	0.614477	-0.702569	9.2269	18	75.2	7	7	0.71182	-0.490416	28.884	16
	1454	Tb927.11.15070	Tb927.11.15070		hypothetical protein, conserved	119.15	12.1	0	36.497	1	1		1	-0.577001	0.00220569	2.65645	+	5.9	4	4	0.669478	-0.57889	41.923	4	9.1	6	6	0.693001	-0.529071	23.245	6	7.1	5	5	0.6493	-0.623043	12.641	5
	1979	Tb927.11.9560	Tb927.11.9560		oxidoreductase, putative	58.621	14.2	0	11.654	1	1			-0.576581	0.00839155	2.07616	+	10.3	4	4	0.627628	-0.672018	7.5483	5	9.2	4	4	0.71286	-0.488309	15.404	5	4.4	2	2	0.67389	-0.569415	89.106	3
	3758	Tb927.9.11120	Tb927.9.11120		hypothetical protein, conserved	72.949	31.1	0	46.962	1	1		1	-0.576209	0.0457788	1.33934	+	21.3	10	10	0.561892	-0.831634	34.877	11	30.7	14	14	0.732923	-0.448267	36.073	15	16.3	8	8	0.73269	-0.448725	43.238	11
	234	Tb927.11.7250;Tb11.v5.0257	Tb927.11.7250;Tb11.v5.0257		hypothetical protein, conserved;hypothetical protein, conserved	53.363	28.8	0	70.168	2	1		1	-0.57534	0.000976936	3.01013	+	24.2	7	7	0.675174	-0.566669	9.4686	17	23	7	7	0.683293	-0.549423	38.686	16	8.7	3	3	0.65523	-0.609927	18.181	9
	3853	Tb927.9.14200	Tb927.9.14200		hypothetical protein, conserved	44.532	46.6	0	81.834	1	1		1	-0.573003	0.0143287	1.84379	+	41.5	10	10	0.647291	-0.627513	9.7896	18	38.9	10	10	0.634558	-0.656176	13.514	16	38.6	9	9	0.73953	-0.435319	20.678	17
	1052	Tb927.10.7610	Tb927.10.7610		hypothetical protein, conserved	165.1	11.2	0	33.419	1	1			-0.572768	0.0466902	1.33077	+	6.1	8	8	0.65475	-0.610983	36.629	10	5	6	6	0.585035	-0.773406	34.769	7	8.7	9	9	0.79338	-0.333916	59.741	10
	2396	Tb927.3.970	Tb927.3.970		hypothetical protein, conserved	39.639	30.5	0	26.241	1	1		1	-0.571974	0.0134864	1.8701	+	24.3	5	5	0.728173	-0.457647	68.465	8	27	6	6	0.619848	-0.690015	15.94	9	20.3	4	4	0.67443	-0.568259	17.503	4
	1194	Tb927.11.10170	Tb927.11.10170		hypothetical protein, conserved	24.353	23.5	0	14.764	1	1		1	-0.570981	0.0343131	1.46454	+	23.5	3	3	0.630517	-0.665393	17.163	3	23.5	3	3	0.618506	-0.693141	12.219	3	18.8	2	2	0.78219	-0.354409	10.072	2
	1643	Tb927.11.2910	Tb927.11.2910	iPGAM	phosphoglycerate mutase, putative (iPGAM)	43.738	17.2	0	16.68	1	1		1	-0.570329	0.00182007	2.73991	+	10.4	3	3	0.660458	-0.59846	10.635	4	13.1	4	4	0.664011	-0.590722	15.293	3	17.2	5	5	0.6965	-0.521805	33.701	7
	1745	Tb927.11.4810	Tb927.11.4810		hypothetical protein, conserved	19.431	23.6	0	13.947	1	1		1	-0.567326	0.0268335	1.57132	+	19.5	3	3	0.594672	-0.749834	8.26	5	19.5	3	3	0.74162	-0.431249	6.3161	4	14.4	3	3	0.69694	-0.520894	9.4368	5
	3997	Tb927.9.5890	Tb927.9.5890		solanesyl-diphosphate synthase, putative	39.253	66.3	0	207.1	1	1		1	-0.566512	0.012768	1.89388	+	66.3	19	19	0.624142	-0.680054	8.4094	42	62.1	17	17	0.676773	-0.563256	17.39	44	42.1	12	12	0.72889	-0.456227	15.413	25
	3659	Tb927.8.6960	Tb927.8.6960		hypothetical protein, conserved	42.527	31.2	0	22.555	1	1		1	-0.564622	0.0385148	1.41437	+	18.2	6	3	0.587855	-0.766468	14.661	4	24.7	7	5	0.68018	-0.556012	83.496	6	2.6	1	1	0.77304	-0.371385	NaN	1
	3270	Tb927.7.590	Tb927.7.590		hypothetical protein, conserved	51.692	16	0	30.078	1	1		1	-0.56289	0.0463906	1.33357	+	4.3	2	2	0.595699	-0.747344	2.5398	2	4.3	2	2	0.799488	-0.322851	4.7742	2	14	4	4	0.65136	-0.618473	3.1172	8
	2511	Tb927.4.3450	Tb927.4.3450		hypothetical protein, conserved	13.735	29.8	0	61.237	1	1		1	-0.561635	0.0298423	1.52517	+	29.8	2	2	0.602664	-0.730575	6.3484	9	29.8	2	2	0.674809	-0.567448	16.774	8	29.8	2	2	0.76478	-0.386883	31.991	7
	2559	Tb927.4.4600	Tb927.4.4600		hypothetical protein, conserved	31.248	37.7	0	31.368	1	1			-0.561431	0.00589386	2.2296	+	28.1	6	6	0.648593	-0.624616	22.761	7	32.7	7	7	0.668449	-0.58111	7.1106	8	28.5	5	5	0.71769	-0.478567	13.273	5
	3230	Tb927.7.5110	Tb927.7.5110		hypothetical protein, conserved	62.367	41.7	0	76.851	1	1			-0.56067	0.0167468	1.77607	+	24.6	8	8	0.617665	-0.695103	18.416	14	33.6	10	10	0.685448	-0.544881	16.785	17	25.3	8	8	0.7361	-0.442026	18.242	11
	2958	Tb927.6.4200	Tb927.6.4200		hypothetical protein, conserved	50.398	19.1	0	22.516	1	1		1	-0.557427	0.0295154	1.52995	+	15.1	5	5	0.616371	-0.69813	34.401	6	16.7	5	5	0.657419	-0.605115	33.052	8	10.1	3	3	0.7743	-0.369035	29.362	5
	2233	Tb927.3.2880	Tb927.3.2880		hypothetical protein, conserved	12.643	57.7	0	34.827	1	1			-0.556555	0.0223969	1.64981	+	47.1	5	5	0.644704	-0.633292	9.901	11	47.1	5	5	0.637714	-0.649018	7.7926	9	47.1	4	4	0.76453	-0.387355	7.7662	9
	3136	Tb927.7.3050	Tb927.7.3050		hypothetical protein, conserved	131.58	28.3	0	90.007	1	1		1	-0.555063	0.0210663	1.67641	+	17.2	12	12	0.629525	-0.667665	17.232	23	23.9	17	17	0.760052	-0.395831	40.05	25	19.4	15	15	0.65898	-0.601693	22.13	18
	2426	Tb927.4.1660	Tb927.4.1660	MCP6	mitochondrial carrier protein, putative (MCP6)	42.163	20	0	19.395	1	1	1		-0.544604	0.0301713	1.52041	+	20	7	7	0.693481	-0.528071	23.955	11	16.1	6	6	0.765345	-0.385818	16.932	9	6.5	3	3	0.60713	-0.719923	10.379	5
	2190	Tb927.3.1940	Tb927.3.1940		hypothetical protein, conserved	49.435	18.9	0	25.039	1	1		1	-0.541771	0.00388713	2.41037	+	14.2	5	5	0.660764	-0.597793	16.534	8	16	6	6	0.684556	-0.546759	23.488	9	8.9	3	3	0.7166	-0.48076	14.579	5
	202	Tb927.7.4940;Tb11.v5.0175	Tb927.7.4940;Tb11.v5.0175		oligopeptidase B protein, putative,serine peptidase, clan SC, family S9A-like protein;oligopeptidase B protein, putative	104.35	12.7	0	15.804	2	1		1	-0.536608	0.0202446	1.69369	+	7.4	5	5	0.692857	-0.529371	17.932	7	5.4	3	3	0.626606	-0.67437	68.468	3	9.3	5	5	0.75467	-0.406082	15.131	6
	3186	Tb927.7.3890	Tb927.7.3890		hypothetical protein, conserved	33.666	24.8	0	19.225	1	1			-0.536045	0.00209444	2.67893	+	21.6	3	3	0.710429	-0.493237	24.292	4	19.6	3	3	0.689417	-0.53655	16.17	3	18	3	3	0.66973	-0.578348	4.8272	2
	552	Tb927.10.11930	Tb927.10.11930		beta-D-hydroxybutyrate dehydrogenase	27.645	45.8	0	100	1	1			-0.529059	0.0184025	1.73512	+	42.3	8	8	0.626684	-0.67419	6.7593	15	42.3	8	8	0.723903	-0.466131	10.999	20	33.1	6	6	0.73364	-0.446856	36.425	13
	1244	Tb927.11.10960	Tb927.11.10960		hypothetical protein, conserved	71.772	35.8	0	134.24	1	1			-0.528737	0.0205164	1.6879	+	28.3	11	11	0.664584	-0.589476	9.1756	17	30	12	12	0.770594	-0.375957	28.763	19	17.7	8	8	0.65032	-0.620778	7.0152	13
	2424	Tb927.4.1610	Tb927.4.1610		hypothetical protein, conserved	39.631	23.1	0	23.692	1	1			-0.526163	0.0118759	1.92533	+	19.8	7	7	0.645953	-0.630499	8.4491	11	19.5	7	7	0.698666	-0.517326	15.748	7	13.9	4	4	0.74192	-0.430664	18.223	6
	3540	Tb927.8.4930	Tb927.8.4930		hypothetical protein, conserved	33.895	34.1	0	48.347	1	1		1	-0.524725	0.00673935	2.17138	+	28.2	5	5	0.702445	-0.509544	24.33	14	28.2	5	5	0.727749	-0.458487	18.786	14	24.3	6	6	0.65695	-0.606145	23.52	14
	1824	Tb927.11.6250	Tb927.11.6250		hypothetical protein, conserved	27.599	42.8	0	205.38	1	1			-0.522612	0.00349522	2.45653	+	42.8	10	10	0.66836	-0.581303	12.294	27	42.8	10	10	0.702001	-0.510456	4.2726	22	31.6	8	8	0.71893	-0.476077	10.221	22
	3349	Tb927.7.910;Tb11.v5.0841	Tb927.7.910;Tb11.v5.0841		hypothetical protein, conserved;hypothetical protein, conserved	80.436	27.1	0	47.391	2	1		1	-0.519978	0.00187934	2.726	+	16.8	7	7	0.676178	-0.564524	47.794	8	16.7	7	7	0.705119	-0.504061	20.604	11	15	7	7	0.71136	-0.491348	19.466	10
	853	Tb927.10.3040	Tb927.10.3040		hypothetical protein, conserved	15.505	51.9	0	44.569	1	1		1	-0.519385	0.00931039	2.03103	+	45.2	5	5	0.664452	-0.589763	24.883	8	45.9	6	6	0.68451	-0.546857	2.5003	11	40.7	4	4	0.74663	-0.421535	14.122	11
	3874	Tb927.9.15240	Tb927.9.15240		hypothetical protein, conserved	28.749	37.1	0	24.787	1	1		1	-0.519149	0.022272	1.65224	+	31.9	4	4	0.625586	-0.676719	3.6864	6	37.1	5	5	0.73828	-0.43776	46.556	6	31.9	5	5	0.73562	-0.442967	9.727	5
	2279	Tb927.3.3680	Tb927.3.3680		hypothetical protein, conserved	16.08	19.7	0.0015902	2.5009	1	1			-0.512112	0.0295273	1.52978	+	19.7	2	2	0.69847	-0.517729	5.0787	2	13.1	1	1	0.630636	-0.66512	NaN	1	6.6	1	1	0.78269	-0.353487	NaN	1
	2037	Tb927.2.2470	Tb927.2.2470	KREPA1	RNA-editing complex protein,KREPA1 (KREPA1)	81.293	12.9	0	39.385	1	1		1	-0.508614	0.0231832	1.63483	+	10.1	5	5	0.70917	-0.495797	4.5952	8	8.7	5	5	0.768994	-0.378955	3.3309	13	7.2	4	4	0.6368	-0.651088	27.67	6
	2467	Tb927.4.2360	Tb927.4.2360		hypothetical protein, conserved	35.65	31.2	0	37.797	1	1		1	-0.508076	0.017562	1.75543	+	21.9	5	5	0.658805	-0.602077	15.623	7	19.7	4	4	0.770891	-0.375401	10.422	7	31.2	7	7	0.68456	-0.546751	8.6395	9
	1684	Tb927.11.3640	Tb927.11.3640		hypothetical protein, conserved	21.781	12.4	0	6.2913	1	1			-0.507836	0.0426112	1.37048	+	6.5	1	1	0.743329	-0.427928	7.1187	2	6.5	1	1	0.771962	-0.373398	29.101	2	5.9	1	1	0.60618	-0.722182	NaN	1
	2072	Tb927.2.4110	Tb927.2.4110		mitochondrial processing peptidase alpha subunit, putative,metallo-peptidase, Clan ME, Family M16	52.064	58.6	0	188.64	1	1			-0.503637	0.0201584	1.69554	+	42.4	13	13	0.644662	-0.633385	18.552	26	54.2	15	15	0.767224	-0.38228	40.865	32	49.7	16	16	0.70944	-0.495247	14.893	33
	776	Tb927.10.180	Tb927.10.180		ATP synthase F1 subunit gamma protein, putative	34.37	66.9	0	320.86	1	1		1	-0.503421	0.00519536	2.28438	+	58.4	16	16	0.673265	-0.570754	8.6526	39	65.9	16	16	0.710126	-0.493852	9.8848	45	50.2	15	15	0.73425	-0.445657	14.634	33
	393	Tb927.1.1730	Tb927.1.1730		hypothetical protein, conserved	75.065	21.9	0	22.979	1	1		1	-0.500708	0.0355834	1.44875	+	16	8	8	0.641519	-0.640436	18.936	11	20.5	9	9	0.684182	-0.547548	8.9068	13	8.7	5	5	0.80433	-0.314141	41.982	7
	419	Tb927.1.3040	Tb927.1.3040		hypothetical protein, conserved	29.227	5.2	0	5.0826	1	1		1	-0.496143	0.0327849	1.48433	+	5.2	1	1	0.773276	-0.370945	18.129	2	5.2	1	1	0.736269	-0.441696	15.796	3	5.2	1	1	0.62599	-0.675789	15.571	2
	1551	Tb927.11.1670	Tb927.11.1670		cysteine desulfurase	48.151	41.9	0	126.63	1	1			-0.493821	0.00724131	2.14018	+	39.8	15	15	0.720669	-0.472592	16.936	22	37.5	14	14	0.740412	-0.4336	23.96	20	27.9	11	11	0.67116	-0.575271	27.732	18
	1337	Tb927.11.1290	Tb927.11.1290		hypothetical protein, conserved	43.112	24.1	0	14.483	1	1		1	-0.493236	0.0414558	1.38241	+	12.6	4	4	0.615953	-0.699107	34.298	4	24.1	6	6	0.75171	-0.411752	11.581	6	4.5	2	2	0.7744	-0.368849	4.643	2
	2194	Tb927.3.2050	Tb927.3.2050		hypothetical protein, conserved	172.41	9.4	0	53.873	1	1		1	-0.49186	0.0399405	1.39859	+	8.3	10	10	0.685495	-0.544782	20.673	17	7.4	9	9	0.643998	-0.634872	19.334	15	4.1	5	5	0.81455	-0.295925	12.098	10
	2137	Tb927.2.6100	Tb927.2.6100		hypothetical protein, conserved	53.279	13.8	0	9.2429	1	1		1	-0.489787	0.0134015	1.87285	+	7.2	2	2	0.676727	-0.563353	8.7521	3	13.8	4	4	0.77006	-0.376957	13.952	6	2.1	1	1	0.69301	-0.529052	NaN	1
	1192	Tb927.11.10150	Tb927.11.10150		hypothetical protein, conserved	137.64	19.3	0	61.243	1	1		1	-0.483439	0.00766507	2.11548	+	12.2	10	10	0.742997	-0.428571	17.591	10	13.1	11	11	0.729767	-0.454492	38.259	10	10	9	9	0.6749	-0.567254	24.154	10
	921	Tb927.10.470	Tb927.10.470		choline dehydrogenase, putative	56.921	57.1	0	148.35	1	1		1	-0.48042	0.00882429	2.05432	+	52.4	17	17	0.714031	-0.485942	16.053	28	57.1	18	18	0.758323	-0.399116	11.496	31	35.6	12	12	0.68009	-0.556203	27.391	19
	1218	Tb927.11.10510	Tb927.11.10510		ubiquinone biosynthesis methyltransferase, putative	32.094	59.4	0	97.867	1	1			-0.479675	0.00143912	2.8419	+	56.2	12	12	0.701902	-0.510658	14.018	24	51.7	11	11	0.716589	-0.480782	20.98	25	41	10	10	0.73327	-0.447584	17.423	18
	1356	Tb927.11.13290	Tb927.11.13290	TbTim17	mitochondrial import inner membrane translocase subunit tim17 (Tim17)	16.296	34.9	0	16.763	1	1			-0.475342	0.00284759	2.54552	+	34.9	4	4	0.734484	-0.445197	13.779	8	34.9	4	4	0.694541	-0.525869	13.74	8	21.7	3	3	0.72953	-0.454961	54.336	4
	3246	Tb927.7.5480	Tb927.7.5480	DHFR-TS	dihydrofolate reductase-thymidylate synthase (DHFR-TS)	58.85	48.2	0	130.08	1	1		1	-0.475087	0.0021404	2.66951	+	46.5	19	19	0.737409	-0.439464	17.447	37	48.2	20	20	0.699643	-0.515309	22.254	36	25	10	10	0.72172	-0.470489	29.331	17
	2573	Tb927.4.4990;Tb927.8.7430	Tb927.4.4990;Tb927.8.7430		ubiquinol-cytochrome c reductase, putative;ubiquinol-cytochrome c reductase, putative	8.3125	90.1	0	61.293	2	1			-0.473369	0.0395448	1.40291	+	90.1	5	5	0.656642	-0.606821	18.135	15	90.1	5	5	0.693193	-0.528671	11.723	14	90.1	5	5	0.82096	-0.284616	33.171	12
	345	Tb927.8.2470;Tb11.v5.0799	Tb927.8.2470;Tb11.v5.0799		hypothetical protein, conserved;hypothetical protein, conserved	11.223	60.6	0	39.862	2	1		1	-0.473291	0.00901951	2.04482	+	60.6	7	7	0.755858	-0.403813	12.036	8	60.6	6	6	0.679117	-0.558268	27.913	9	36.2	4	4	0.7281	-0.457791	14.693	10
	2651	Tb927.5.1710	Tb927.5.1710		ribonucleoprotein p18, mitochondrial precursor, putative	21.226	65.4	0	323.31	1	1			-0.47226	0.0023212	2.63429	+	65.4	9	9	0.735456	-0.443288	9.0211	43	65.4	9	9	0.698714	-0.517225	4.448	47	61.2	8	8	0.72887	-0.456267	9.6982	42
	417	Tb927.1.3010	Tb927.1.3010		mRNA processing protein, putative	40.813	47.8	0	52.418	1	1		1	-0.4711	0.0126468	1.89802	+	40.6	10	10	0.734107	-0.445939	40.523	15	44.9	11	11	0.761209	-0.393636	9.0544	15	37.9	9	9	0.67188	-0.573724	32.95	12
	2163	Tb927.3.1380	Tb927.3.1380		ATP synthase beta chain, mitochondrial precursor,ATP synthase F1, beta subunit	55.775	74	0	323.31	1	1		1	-0.466877	9.48154e-05	4.02312	+	74	30	30	0.727537	-0.458907	9.9585	170	74	29	29	0.723432	-0.467071	36.381	177	73.6	27	27	0.71964	-0.474653	18.764	154
	510	Tb927.10.10830	Tb927.10.10830	RGG2	RGG2 (RGG2)	32.404	24.4	0	108.45	1	1		1	-0.466598	0.0380765	1.41934	+	24.4	8	8	0.637024	-0.650581	12.758	17	24.4	8	8	0.754774	-0.405884	19.084	13	24.4	7	7	0.78822	-0.34333	17.31	12
	3078	Tb927.7.1910;REV__Tb927.7.1910	Tb927.7.1910	GCVP	pyridoxal phosphate containing glycine decarboxylase, putative (GCVP)	106.29	55.2	0	294.11	2	1		1	-0.466535	0.000197763	3.70385	+	54.5	35	35	0.718701	-0.476537	12.808	63	51.1	31	31	0.729927	-0.454176	14.185	59	27.7	21	21	0.72252	-0.468891	25.001	35
	1915	Tb927.11.8110	Tb927.11.8110		hypothetical protein, conserved	39.475	5	0	4.4386	1	1		1	-0.463373	0.0433334	1.36318	+	5	1	1	0.741345	-0.431783	NaN	1	0	0	0	NaN		NaN	0	5	1	1	0.70958	-0.494963	NaN	1
	2276	Tb927.3.3630	Tb927.3.3630	EF-Ts	elongation factor ts, putative (EF-TS)	29.732	52.2	0	75.599	1	1		1	-0.461801	0.0306085	1.51416	+	52.2	7	7	0.664143	-0.590434	11.559	9	48.9	6	6	0.808081	-0.307428	16.371	13	13.1	2	2	0.71324	-0.48754	21.005	4
	555	Tb927.10.12000	Tb927.10.12000		iron-sulfur cluster assembly protein, putative	11.772	37.4	0	13.152	1	1		1	-0.460425	0.00881481	2.05479	+	37.4	4	4	0.685824	-0.54409	21.017	5	29.3	3	3	0.737463	-0.439357	8.2782	4	37.4	4	4	0.759	-0.397828	39.799	7
	2873	Tb927.6.2380	Tb927.6.2380		hypothetical protein, conserved	81.636	11.1	0	18.194	1	1		1	-0.457012	0.0320622	1.49401	+	11.1	5	5	0.649098	-0.623492	17.911	4	9.6	4	4	0.762369	-0.391438	23.353	5	3.6	2	2	0.78127	-0.356107	12.312	3
	1943	Tb927.11.8870	Tb927.11.8870	KREH1	mitochondrial DEAD box protein,KREH1 (KREH1)	60.659	60.3	0	97.885	1	1		1	-0.456011	0.00816821	2.08787	+	58.6	26	26	0.693433	-0.528171	34.324	49	55.7	26	26	0.729341	-0.455334	9.5158	51	50.4	22	22	0.76603	-0.384527	20.219	32
	1393	Tb927.11.13890	Tb927.11.13890		hypothetical protein, conserved	30.693	25.4	0	26.941	1	1		1	-0.453655	0.024539	1.61014	+	22	4	4	0.661551	-0.596076	16.332	4	19.8	4	4	0.755173	-0.405121	13.033	5	22	4	4	0.77929	-0.359768	12.638	5
	2522	Tb927.4.3680	Tb927.4.3680		protein phosphatase 2C, putative	29.99	42.7	0	43.248	1	1		1	-0.453467	0.0350783	1.45496	+	39.1	6	6	0.652103	-0.616828	16.954	10	38.7	7	7	0.801796	-0.318693	11.294	9	36.2	7	7	0.7449	-0.424881	14.604	10
	757	Tb927.10.15710	Tb927.10.15710	MCP7	mitochondrial carrier protein (MCP7)	35.875	31.3	0	25.663	1	1	1		-0.451388	0.0152611	1.81641	+	17.6	5	5	0.694589	-0.525768	7.5583	10	21.7	6	6	0.78964	-0.340733	10.278	7	27.2	8	8	0.71318	-0.487662	6.0902	11
	2866	Tb927.6.2230	Tb927.6.2230		RGG protein	86.64	33.7	0	133.1	1	1		1	-0.45006	0.000991304	3.00379	+	32.5	24	24	0.72998	-0.454071	26.297	49	30.7	21	21	0.74549	-0.42374	20.279	43	24.5	15	15	0.72078	-0.472369	21.08	33
	136	Tb927.5.4360;Tb05.5K5.20	Tb927.5.4360;Tb05.5K5.20		hypothetical protein, conserved;hypothetical protein, conserved,BAC from homologous region on chr5	36.427	9.9	0.0016256	2.7407	2	1		1	-0.448338	0.0304713	1.51611	+	5.9	2	2	0.817595	-0.290542	13.1	3	6.2	2	2	0.705517	-0.503247	15.118	3	7.8	2	2	0.68244	-0.551226	19.49	2
	863	Tb927.10.3210	Tb927.10.3210		delta-1-pyrroline-5-carboxylate dehydrogenase, putative	62.036	76.3	0	323.31	1	1		1	-0.44717	0.0165168	1.78208	+	74.9	35	35	0.677231	-0.562279	13.433	186	76.1	35	35	0.771248	-0.374733	18.991	169	62.7	30	30	0.7555	-0.404496	15.858	127
	650	Tb927.10.13850	Tb927.10.13850		hypothetical protein, conserved	43.008	46.6	0	46.349	1	1		1	-0.444191	0.0339453	1.46922	+	33.9	9	9	0.654836	-0.610794	38.543	12	37.9	10	10	0.768699	-0.37951	27.958	12	30.3	9	9	0.7888	-0.342269	29.005	11
	2064	Tb927.2.3800	Tb927.2.3800		guide RNA associated protein, GAP1,MRB1-associated protein	55.46	44.9	0	213.55	1	1		1	-0.443172	0.0202023	1.6946	+	42.9	17	17	0.673401	-0.570463	11.378	35	42.9	17	17	0.762835	-0.390558	9.5963	32	37.4	14	14	0.77459	-0.368495	22.734	27
	2638	Tb927.5.1470	Tb927.5.1470	B5R	NADH-cytochrome b5 reductase, putative (B5R)	32.756	79.3	0	118.96	1	1			-0.441331	0.00708318	2.14977	+	69.7	14	14	0.699301	-0.516015	15.468	20	63.6	12	12	0.755801	-0.403922	7.8341	17	59.9	14	14	0.75573	-0.404057	16.82	17
	2616	Tb927.5.1030	Tb927.5.1030	Isa2	hypothetical protein, conserved	19.07	31.2	0	13.918	1	1		1	-0.437123	0.00721232	2.14193	+	31.2	4	4	0.701361	-0.511772	5.2008	5	23.1	3	3	0.758208	-0.399335	10.147	6	23.1	3	3	0.75772	-0.400263	26.025	6
	2666	Tb927.5.2070	Tb927.5.2070		hypothetical protein, conserved	68.756	10.3	0	19.881	1	1			-0.43709	0.0121179	1.91657	+	8.7	4	4	0.787588	-0.344488	32.249	4	10.3	5	5	0.702839	-0.508733	40.802	5	4.7	2	2	0.72797	-0.458049	1.516	2
	1092	Tb927.10.8210	Tb927.10.8210	KREPA2	KREPA2 (KREPA2)	62.912	41.9	0	96.165	1	1		1	-0.433289	0.0173844	1.75984	+	36.5	12	12	0.687049	-0.541515	11.209	15	36.5	12	12	0.750131	-0.414785	27.195	19	24.9	9	9	0.78809	-0.343568	43.313	13
	3396	Tb927.8.1860	Tb927.8.1860		pitrilysin-like metalloprotease,metallo-peptidase, Clan ME, Family M16C	114.53	53.1	0	323.31	1	1		1	-0.430774	0.00638643	2.19474	+	47.1	33	33	0.716897	-0.480162	20.535	67	48.4	35	35	0.77694	-0.364124	19.328	61	42.3	30	30	0.73304	-0.448036	22.029	58
	2503	Tb927.4.3300	Tb927.4.3300		mitochondrial ATP-dependent zinc metallopeptidase, putative,metallo-peptidase, Clan MA(E) Family M41	78.872	26.8	0	59.017	1	1		1	-0.424845	0.0334247	1.47593	+	22.9	13	13	0.684697	-0.546462	19.639	19	20.6	13	13	0.730407	-0.453228	13.887	20	14.6	9	9	0.82654	-0.274843	14.497	16
	735	Tb927.10.15220	Tb927.10.15220		hypothetical protein, conserved	22.101	13.9	0	112.59	1	1		1	-0.421617	0.0355919	1.44865	+	9.3	2	2	0.667423	-0.583326	23.802	5	13.9	3	3	0.778331	-0.361544	10.279	5	9.3	2	2	0.80108	-0.319982	2.2035	2
	1742	Tb927.11.4780	Tb927.11.4780		pyruvate dehydrogenase (lipoamide) kinase, putative	51.187	26.3	0	31.471	1	1		1	-0.42139	0.0121211	1.91646	+	22.2	6	6	0.755116	-0.40523	8.5094	9	24.3	7	7	0.784806	-0.349592	10.77	13	15.5	5	5	0.70254	-0.509348	7.8168	7
	2139	Tb927.3.1000	Tb927.3.1000		frataxin-like, mitochondrial precursor, putative	19.407	52.8	0	29.006	1	1		1	-0.418599	0.00124001	2.90658	+	52.8	4	4	0.761035	-0.393965	34.459	6	52.8	4	4	0.734592	-0.444985	21.695	10	17.8	2	2	0.74906	-0.416847	38.718	7
	2287	Tb927.3.3890	Tb927.3.3890		hypothetical protein, conserved	36.68	26.2	0	18.17	1	1		1	-0.416397	0.00189843	2.7216	+	22.5	4	4	0.745379	-0.423955	9.8105	5	22.5	4	4	0.76746	-0.381837	9.286	7	10.3	3	3	0.7354	-0.443399	32.594	4
	3970	Tb927.9.4520	Tb927.9.4520		mitochondrial processing peptide beta subunit, putative,metallo-peptidase, Clan ME, Family M16	53.689	65.4	0	154.35	1	1			-0.414303	0.0473935	1.32428	+	60.8	19	19	0.660677	-0.597984	13.592	41	61.4	20	20	0.816993	-0.291604	7.3511	40	44.2	15	15	0.78278	-0.353321	17.628	29
	2179	Tb927.3.1760	Tb927.3.1760		chaperone protein DNAj, putative	29.423	23.8	0	6.4289	1	1		1	-0.413878	0.0312666	1.50492	+	16.2	3	3	0.798276	-0.325041	19.134	7	11.9	3	3	0.676956	-0.562865	47.745	4	15	3	3	0.78256	-0.353727	47.744	5
	498	Tb927.10.10610	Tb927.10.10610		protein tyrosine phosphatase, putative	25.449	22.3	0	36.56	1	1			-0.41224	0.00592015	2.22767	+	22.3	4	4	0.744934	-0.424815	6.0053	7	22.3	4	4	0.783576	-0.351855	9.2935	8	4.4	1	1	0.72696	-0.460052	24.435	2
	1632	Tb927.11.2680	Tb927.11.2680		hypothetical protein, conserved	80.025	4.7	0	6.8076	1	1			-0.409174	0.00850325	2.07042	+	4.7	3	3	0.790451	-0.339251	64.981	4	1.4	1	1	0.748223	-0.41846	13.502	2	3.6	2	2	0.72206	-0.469809	13.916	3
	2106	Tb927.2.5020	Tb927.2.5020		acyl-CoA oxidase, putative	82.398	14.4	0	22.063	1	1		1	-0.408847	0.012569	1.9007	+	12.2	5	5	0.727802	-0.458382	14.141	6	12.2	5	5	0.803084	-0.316377	19.953	6	6.2	4	4	0.73114	-0.45178	13.483	3
	3650	Tb927.8.6820	Tb927.8.6820		hypothetical protein, conserved	47.159	13.5	0	11.314	1	1		1	-0.406283	0.0126044	1.89948	+	6	1	1	0.772977	-0.371503	NaN	1	11.4	2	2	0.784683	-0.349818	26.002	2	8.1	2	2	0.70832	-0.497527	25.537	2
	940	Tb927.10.5120	Tb927.10.5120	KREPA6	KREPA6 (KREPA6)	18.09	37.2	0	11.357	1	1		1	-0.406133	0.0157137	1.80372	+	37.2	5	5	0.721397	-0.471135	16.65	6	15.2	2	2	0.809782	-0.304394	1.1367	2	15.2	2	2	0.73567	-0.442869	12.25	2
	3335	Tb927.7.7430;Tb927.7.7420	Tb927.7.7430;Tb927.7.7420		ATP synthase alpha chain, mitochondrial precursor,ATP synthase F1, alpha subunit;ATP synthase alpha chain, mitochondrial precursor,ATP synthase F1, alpha subunit	63.502	60.6	0	323.31	2	1		1	-0.403827	0.000825454	3.08331	+	60.6	32	32	0.755116	-0.40523	13.198	119	60.6	32	32	0.766812	-0.383055	11.556	114	32.7	20	20	0.74577	-0.423197	24.336	56
	3585	Tb927.8.5660	Tb927.8.5660		hypothetical protein, conserved	24.492	30.7	0	14.921	1	1		1	-0.403025	0.0322573	1.49137	+	24.8	4	4	0.830082	-0.268674	20.924	3	27.5	4	4	0.749681	-0.41565	5.4702	4	11.5	2	2	0.69508	-0.524749	9.0136	2
	2038	Tb927.2.2520;Tb927.2.2510	Tb927.2.2520;Tb927.2.2510		voltage-dependent anion-selective channel;voltage-dependent anion-selective channel	29.189	75.9	0	303.82	2	1			-0.398206	0.0162225	1.78988	+	75.9	18	18	0.781922	-0.354904	8.7505	91	75.9	18	18	0.706864	-0.500496	12.757	83	74.1	15	15	0.79047	-0.339217	14.528	42
	3192	Tb927.7.3960	Tb927.7.3960		50S ribosomal protein L16, putative	19.13	24.6	0	7.2424	1	1		1	-0.396399	0.0195801	1.70819	+	14.4	2	2	0.704027	-0.506297	46.367	2	19.8	3	3	0.777726	-0.362666	7.4597	3	10.2	2	2	0.80094	-0.320234	NaN	1
	1806	Tb927.11.600	Tb927.11.600		hypothetical protein, conserved	12.081	34.9	0	17.425	1	1		1	-0.393592	0.00687898	2.16248	+	34.9	3	3	0.730567	-0.452912	6.6543	11	34.9	3	3	0.764059	-0.388245	15.754	11	34.9	3	3	0.79025	-0.339619	22.421	7
	3685	Tb927.8.7530	Tb927.8.7530		3,2-trans-enoyl-CoA isomerase, mitochondrial precursor, putative	39.776	57.3	0	104.67	1	1		1	-0.390308	0.0118844	1.92502	+	57.3	13	10	0.753466	-0.408386	10.285	29	53.4	12	9	0.730034	-0.453965	4.5899	22	28.5	8	5	0.80744	-0.308573	8.661	21
	1850	Tb927.11.6660	Tb927.11.6660		hypothetical protein, conserved	103.55	7.1	0	18.39	1	1		1	-0.386847	0.0105169	1.97811	+	4.8	4	4	0.788395	-0.34301	14.491	4	7.1	5	5	0.784129	-0.350837	11.983	4	4.8	4	4	0.72362	-0.466696	22.068	4
	2771	Tb927.5.4330	Tb927.5.4330		dihydrolipoamide branched chain transacylase, putative	47.651	52.6	0	134.06	1	1		1	-0.382108	0.00509723	2.29267	+	47.4	17	17	0.797003	-0.327342	12.968	30	49.2	17	17	0.753239	-0.408821	25.205	29	31.4	14	14	0.75254	-0.41016	21.652	25
	1848	Tb927.11.6630	Tb927.11.6630		3-methylcrotonoyl-CoA carboxylase beta subunit, putative	66.531	45.1	0	73.935	1	1		1	-0.379506	0.0236351	1.62644	+	33	11	11	0.720202	-0.473527	15.612	20	32	11	11	0.760283	-0.395392	9.6609	20	32.5	11	11	0.82955	-0.269599	22.261	15
	3148	Tb927.7.3270	Tb927.7.3270		hypothetical protein, conserved	90.386	17.1	0	18.785	1	1		1	-0.379044	0.019946	1.70015	+	8.4	5	5	0.755515	-0.404467	21.458	6	14.6	9	9	0.728067	-0.457857	30.9	9	6.1	4	4	0.82656	-0.274809	19.877	5
	3663	Tb927.8.7040	Tb927.8.7040		hypothetical protein, conserved	21.365	36	0	134.57	1	1		1	-0.376448	0.0107304	1.96938	+	36	5	5	0.799872	-0.322159	10.345	19	36	5	5	0.782228	-0.354339	6.3717	17	36	5	5	0.7306	-0.452846	7.6818	13
	1483	Tb927.11.15550	Tb927.11.15550	B5R	NADH-cytochrome b5 reductase, putative (B5R)	33.885	58.4	0	104.23	1	1			-0.375517	0.0494879	1.3055	+	58.4	9	9	0.869036	-0.202512	13.975	19	58.4	9	9	0.732172	-0.449746	15.8	17	44.8	7	7	0.71982	-0.474292	12.542	14
	3660	Tb927.8.6970;Tb927.4.5350	Tb927.8.6970;Tb927.4.5350		3-methylcrotonyl-CoA carboxylase alpha subunit, putative;3-methylcrotonyl-CoA carboxylase, pseudogene, putative,3-methylcrotonyl-CoA carboxylase, point mutation	73.906	19.5	0	25.273	2	1		1	-0.371923	0.0046069	2.33659	+	17.4	7	7	0.754717	-0.405992	12.198	7	19.5	8	8	0.764526	-0.387363	23.434	8	9.7	3	3	0.79973	-0.322415	34.805	2
	2784	Tb927.5.690	Tb927.5.690		hypothetical protein, conserved	16.361	41.1	0	9.5065	1	1			-0.371725	0.00665719	2.17671	+	28.5	3	3	0.775555	-0.3667	10.343	7	33.8	3	3	0.743882	-0.426855	30.601	5	6.6	1	1	0.80017	-0.321622	13.513	2
	3191	Tb927.7.3950	Tb927.7.3950	KRET1	RNA-editing complex protein,RNA-editing 3 terminal uridylyl transferase 1,KRET1 (KRET1)	107.38	11.3	0	22.877	1	1			-0.367551	0.0300916	1.52155	+	6.7	6	6	0.837802	-0.255319	19.087	5	6.4	5	5	0.775916	-0.366028	10.555	3	7.8	7	7	0.71633	-0.481304	21.933	6
	3533	Tb927.8.4810	Tb927.8.4810	PHB1	prohibitin 1 (PHB1)	31.429	57.4	0	67.587	1	1			-0.365161	0.0326162	1.48657	+	48	15	15	0.746491	-0.421802	11.833	37	55.2	16	16	0.73551	-0.443182	14.385	34	44.4	15	15	0.85234	-0.230499	20.196	30
	3728	Tb927.9.10310	Tb927.9.10310	MCP11	mitochondrial carrier protein (MCP11)	34.295	53.3	0	166.12	1	1	1		-0.362338	0.0191302	1.71828	+	50.8	15	15	0.736269	-0.441696	22.955	52	53.3	17	17	0.769645	-0.377735	10.624	49	30.9	9	9	0.83071	-0.267583	10.812	22
	157	Tb927.10.4310;Tb10.v4.0045	Tb927.10.4310;Tb10.v4.0045	PHB2	prohibitin 2, putative (PHB2);prohibitin, putative,chrX additional, unordered contigs	32.215	74.6	0	230.95	2	1			-0.359718	0.00339675	2.46894	+	74.6	19	19	0.757691	-0.400319	18.501	41	74.6	19	19	0.795545	-0.329985	13.379	41	67.1	18	18	0.78521	-0.34885	9.5903	43
	985	Tb927.10.6190	Tb927.10.6190	ALDH	aldehyde dehydrogenase, putative (ALDH)	54.033	45.9	0	155.14	1	1		1	-0.358958	0.0130805	1.88338	+	45.9	14	14	0.736269	-0.441696	12.937	27	40	12	12	0.805088	-0.312781	10.303	25	40	12	12	0.79974	-0.322397	12.584	18
	2727	Tb927.5.3350	Tb927.5.3350		iron superoxide dismutase, putative	26.824	76.1	0	285.63	1	1		1	-0.358711	0.000708412	3.14971	+	76.1	14	14	0.784191	-0.350724	17.422	46	64.3	13	13	0.769645	-0.377735	6.7163	36	52.9	9	9	0.78585	-0.347674	15.303	26
	3373	Tb927.8.1420	Tb927.8.1420	ACAD	acyl-CoA dehydrogenase, mitochondrial precursor, putative	55.982	47.6	0	126.3	1	1		1	-0.358555	0.0218223	1.6611	+	38.3	12	12	0.735024	-0.444137	27.206	15	45.3	14	14	0.772499	-0.372395	25.282	18	30.1	9	9	0.83559	-0.259133	18.048	11
	1699	Tb927.11.3860	Tb927.11.3860		hypothetical protein, conserved	50.409	25.7	0	45.463	1	1		1	-0.358209	0.00957377	2.01892	+	19.3	7	7	0.746269	-0.422233	18.389	13	20.8	7	7	0.812018	-0.300417	19.284	11	17.5	6	6	0.78351	-0.351976	1.4616	13
	3633	Tb927.8.6480	Tb927.8.6480		hypothetical protein, conserved	36.943	21.5	0	29.801	1	1			-0.356679	0.0131067	1.88251	+	21.5	5	5	0.801346	-0.319502	14.307	7	9.4	2	2	0.805802	-0.311503	2.0597	6	6.8	2	2	0.73763	-0.439031	11.842	2
	1538	Tb927.11.1650	Tb927.11.1650		hypothetical protein, conserved	16.067	14.8	0	3.7326	1	1		1	-0.356297	0.0398392	1.39969	+	0	0	0	NaN		NaN	0	14.8	1	1	0.769172	-0.378623	NaN	1	14.8	1	1	0.79335	-0.333971	NaN	1
	315	Tb927.7.2570;Tb11.v5.0611	Tb927.7.2570;Tb11.v5.0611		guide RNA associated protein, GAP2;hypothetical protein, conserved	52.545	59	0	187.46	2	1		1	-0.35363	0.0442808	1.35379	+	59	19	19	0.703928	-0.5065	12.767	40	57.1	18	18	0.81606	-0.293253	47.487	40	46.7	14	14	0.83443	-0.261137	18.794	27
	3678	Tb927.8.7380;Tb927.4.5050	Tb927.8.7380;Tb927.4.5050		dihydrolipoamide dehydrogenase, point mutation,acetoin dehydrogenase e3 component, putative;dihydrolipoamide dehydrogenase, pseudogene, putative,acetoin dehydrogenase e3 component, point mutation,dihydrolipoamide dehydrogenase, point mutation	60.014	38.3	0	70.881	2	1		1	-0.349113	0.00655365	2.18352	+	22.5	9	9	0.765814	-0.384934	21.922	13	28.4	12	12	0.774114	-0.369383	34.819	14	16.3	7	7	0.81619	-0.293023	46.539	10
	3445	Tb927.8.2740	Tb927.8.2740	TbRBP38	mitochondrial RNA binding protein (TbRBP38)	38.497	51.8	0	180.87	1	1		1	-0.34811	0.0247484	1.60645	+	49.7	12	12	0.731315	-0.451435	33.102	29	47.6	11	11	0.835143	-0.259905	11.635	28	49.7	12	12	0.79389	-0.332989	16.869	28
	762	Tb927.10.1580	Tb927.10.1580		hypothetical protein, conserved	12.232	33.3	0	16.614	1	1			-0.34689	0.0135291	1.86873	+	9.6	1	1	0.8259	-0.275961	3.6284	2	21.9	2	2	0.748895	-0.417164	19.552	3	21.1	2	2	0.78592	-0.347546	13.527	2
	535	Tb927.10.11520	Tb927.10.11520	TbTim13	hypothetical protein, conserved	13.421	67.5	0	31.014	1	1			-0.343811	0.00429363	2.36718	+	67.5	7	7	0.763767	-0.388796	5.8338	9	60.7	7	7	0.798212	-0.325156	8.1913	9	46.2	5	5	0.80247	-0.31748	6.5015	5
	3120	Tb927.7.2700	Tb927.7.2700	B5R	NADH-cytochrome b5 reductase, putative (B5R)	31.856	77	0	280.8	1	1			-0.338797	0.00953389	2.02073	+	77	22	22	0.806582	-0.310107	21.656	67	71.4	20	20	0.755116	-0.40523	8.4563	63	63.1	17	17	0.81166	-0.301053	14.573	53
	2861	Tb927.6.2170	Tb927.6.2170		co-chaperone GrpE, putative	23.877	45.9	0	48.099	1	1		1	-0.337161	0.0356665	1.44774	+	41.9	9	9	0.758783	-0.398241	7.2724	40	41.9	9	9	0.754262	-0.406863	6.2013	38	45.9	10	10	0.86671	-0.206379	4.298	35
	1309	Tb927.11.12230	Tb927.11.12230		heat shock protein HslVU, ATPase subunit HslU, putative,ATP-dependent hsl protease ATP-binding subunit hslU, putative	54.897	55.8	0	158.3	1	1			-0.335325	0.0120393	1.9194	+	48.6	21	21	0.754831	-0.405775	54.746	36	46	18	18	0.823723	-0.279768	23.946	30	35.9	15	15	0.80083	-0.320432	19.02	27
	3805	Tb927.9.12730	Tb927.9.12730		chaperone protein DNAj, putative	48.592	60.3	0	187.7	1	1		1	-0.333105	0.0042528	2.37133	+	56.8	18	18	0.79447	-0.331934	24.647	43	55.7	18	18	0.814531	-0.295958	11.694	42	40.8	13	13	0.77302	-0.371422	17.33	35
	1903	Tb927.11.7900	Tb927.11.7900	RBP16	mitochondrial RNA binding protein,RBP16,RNA- binding protein of 16 kDa (RBP16)	15.118	70.2	0	132.98	1	1		1	-0.327874	0.0257079	1.58993	+	70.2	11	11	0.750413	-0.414244	49.946	46	70.2	9	9	0.790202	-0.339707	33.947	39	68.8	9	9	0.85283	-0.22967	51.4	30
	549	Tb927.10.11870	Tb927.10.11870	MRB11870	mitochondrial RNA binding protein (MRB11870)	34.683	58.4	0	118.73	1	1		1	-0.32713	0.0143935	1.84183	+	47.7	10	10	0.782718	-0.353436	20.214	16	58.4	11	11	0.841397	-0.249142	15.355	20	35.2	9	9	0.76907	-0.378813	10.681	11
	3451	Tb927.8.2850	Tb927.8.2850		Poly(A)-specific ribonuclease PARN-1	65.146	11.6	0	16.588	1	1			-0.323995	0.0213843	1.6699	+	8.9	4	4	0.747999	-0.418891	24.984	5	11.6	5	5	0.83375	-0.262313	27.694	5	7.5	3	3	0.81746	-0.29078	29.14	4
	3637	Tb927.8.6580	Tb927.8.6580		succinate dehydrogenase flavoprotein, putative	66.88	65.8	0	323.31	1	1		1	-0.323402	0.0375098	1.42586	+	56.7	28	28	0.732064	-0.449958	16.272	62	60.4	28	28	0.822774	-0.281431	34.916	56	56	23	23	0.84744	-0.238817	21.119	49
	2016	Tb927.2.1680;Tb927.2.1560	Tb927.2.1680;Tb927.2.1560		cyclophilin-type peptidyl-prolyl cis-trans isomerase, putative;cyclophilin-type peptidyl-prolyl cis-trans isomerase, putative	21.165	62.2	0	136.7	2	1		1	-0.323163	0.0396776	1.40145	+	62.2	10	10	0.739864	-0.434668	17.709	38	62.2	10	10	0.795672	-0.329755	11.122	38	50	8	8	0.8675	-0.205064	9.7099	20
	1177	Tb927.10.9970	Tb927.10.9970		hypothetical protein, conserved	110	23.5	0	67.859	1	1			-0.322126	0.00326063	2.4867	+	16	12	12	0.788333	-0.343123	9.0285	16	18.6	15	15	0.791202	-0.337882	41.178	21	14.7	11	11	0.82053	-0.285372	25.803	15
	3408	Tb927.8.2020	Tb927.8.2020		agmatinase, putative	36.517	16.9	0	9.8663	1	1		1	-0.321912	0.00499417	2.30154	+	11.5	3	3	0.788644	-0.342555	12.015	4	12.4	3	3	0.786287	-0.346872	14.483	2	7.6	2	2	0.8257	-0.27631	5.4043	2
	3991	Tb927.9.5590	Tb927.9.5590	TOP2	DNA topoisomerase ii (TOP2)	137.56	21.5	0	67.001	1	1			-0.320313	0.0124797	1.90379	+	11.2	10	10	0.814664	-0.295723	12.673	16	15.8	13	13	0.762369	-0.391438	36.645	18	9.1	7	7	0.82715	-0.273779	15.326	13
	1707	Tb927.11.3980	Tb927.11.3980		mitochondrial processing peptidase alpha subunit, putative,metallo-peptidase, Clan ME, Family M16	57.037	66.2	0	323.31	1	1		1	-0.311791	0.0453097	1.34381	+	63.3	26	26	0.76929	-0.378401	11.176	91	64.5	28	28	0.767048	-0.382612	10.887	91	47.7	19	19	0.88616	-0.174361	12.189	61
	2697	Tb927.5.2780	Tb927.5.2780		mitochondrial DNA polymerase beta	46.102	47.7	0	97.973	1	1		1	-0.309724	0.0406394	1.39105	+	43.2	15	15	0.738062	-0.438186	12.191	22	45.7	16	16	0.838574	-0.253989	20.653	24	36.1	13	13	0.84851	-0.236996	19.754	25
	2336	Tb927.3.4990	Tb927.3.4990		oxidoreductase, putative	36.432	37.5	0	48.531	1	1		1	-0.309218	0.0101836	1.9921	+	34.8	8	8	0.780031	-0.358396	22.137	10	32.4	7	7	0.80186	-0.318577	14.939	10	23.9	6	6	0.8405	-0.25068	17.578	8
	2047	Tb927.2.2970	Tb927.2.2970	MCP13	mitochondrial carrier protein (MCP13)	33.962	56.1	0	98.101	1	1	1		-0.30692	0.0186494	1.72933	+	56.1	15	15	0.778695	-0.36087	17.669	33	55.8	15	15	0.791766	-0.336855	6.7841	30	41	11	11	0.85676	-0.223037	24.733	20
	1562	Tb927.11.16860	Tb927.11.16860	MRB8620	mitochondrial RNA binding protein (MRB8620)	53.077	34.2	0	56.416	1	1			-0.3041	0.0181776	1.74046	+	29.3	9	9	0.789889	-0.340277	10.165	12	26.6	9	9	0.784129	-0.350837	11.422	14	16.6	5	5	0.85786	-0.221186	15.87	9
	1057	Tb927.10.770	Tb927.10.770		hypothetical protein, conserved	69.121	25.8	0	81.388	1	1		1	-0.304073	0.0480788	1.31805	+	22.2	9	9	0.756601	-0.402395	20.992	17	20.3	8	8	0.790451	-0.339251	18.692	15	19.6	8	8	0.88849	-0.170573	14.059	11
	1372	Tb927.11.13580	Tb927.11.13580		ubiquinone biosynthesis protein-like protein	27.93	35.3	0	16.665	1	1			-0.301541	0.00523541	2.28105	+	20.1	3	3	0.83619	-0.258097	5.3718	8	28.1	4	4	0.796559	-0.328147	17.193	9	20.9	4	4	0.80197	-0.31838	26.089	4
	3838	Tb927.9.1380	Tb927.9.1380		hypothetical protein, conserved	42.439	60.2	0	78.948	1	1		1	-0.29933	0.0444453	1.35217	+	44.9	14	14	0.751089	-0.412944	12.407	21	44.6	16	16	0.813206	-0.298306	20.12	20	52.5	17	17	0.87859	-0.186738	23.599	29
	3178	Tb927.7.3750	Tb927.7.3750		TFIIF-stimulated CTD phosphatase, putative	22.571	59.6	0	27.44	1	1		1	-0.296688	0.00553661	2.25676	+	49	7	7	0.796432	-0.328377	7.6232	9	36.4	6	6	0.838574	-0.253989	9.4782	8	26.8	3	3	0.80793	-0.307698	11.915	5
	3622	Tb927.8.630	Tb927.8.630		lipoate-protein ligase, putative,lipoyl ligase, putative,lipoyltransferase, putative,lipoate biosynthesis protein, putative	57.052	5.5	0	4.5088	1	1		1	-0.295401	0.0133106	1.8758	+	3.3	1	1	0.790952	-0.338339	NaN	1	3.3	1	1	0.800769	-0.320542	NaN	1	5.5	2	2	0.85422	-0.227321	NaN	1
	2508	Tb927.4.3390	Tb927.4.3390		tuzin, putative	74.179	2.4	0.0013646	2.8247	1	1		1	-0.295369	0.038037	1.41979	+	2.4	1	1	0.865801	-0.207893	NaN	1	2.4	1	1	0.753409	-0.408494	NaN	1	2.4	1	1	0.82948	-0.269721	NaN	1
	3485	Tb927.8.3690	Tb927.8.3690	IDH	isocitrate dehydrogenase [NADP], mitochondrial precursor, putative (IDH)	48.565	49	0	56.599	1	1		1	-0.29422	0.0179995	1.74474	+	39.6	13	11	0.85955	-0.218347	19.83	17	34.6	11	10	0.806582	-0.310107	24.077	18	41	13	11	0.7823	-0.354206	18.763	16
	822	Tb927.10.2530	Tb927.10.2530		adenylate kinase, putative	24.941	67.6	0	219.62	1	1			-0.294202	0.0024825	2.60511	+	67.6	15	15	0.813603	-0.297602	28.103	43	67.6	15	15	0.802311	-0.317767	11.629	49	62.6	14	14	0.83091	-0.267236	19.286	35
	2978	Tb927.6.4540	Tb927.6.4540		3-hydroxy-3-methylglutaryl-CoA reductase, putative	45.944	53.9	0	178.73	1	1		1	-0.291413	0.0216513	1.66452	+	51.2	15	15	0.857045	-0.222557	11.44	28	44.2	13	13	0.823859	-0.279531	11.292	27	41.5	12	12	0.77263	-0.37215	17.006	20
	1573	Tb927.11.1710	Tb927.11.1710	GBP21	mitochondrial RNA binding protein 1,gBP21, MRP1 (GBP21)	23.253	46.1	0	104.8	1	1		1	-0.290741	0.00179941	2.74487	+	46.1	8	8	0.817795	-0.290188	8.099	25	46.1	9	9	0.829531	-0.269632	21.163	26	39.8	8	8	0.8053	-0.312402	5.7261	24
	1570	Tb927.11.1700	Tb927.11.1700		hypothetical protein, conserved	61.63	31.6	0	98.627	1	1		1	-0.289166	0.0263132	1.57983	+	31.6	10	10	0.766401	-0.383829	16.693	20	31.6	10	10	0.852878	-0.229588	15.281	18	15.1	5	5	0.83852	-0.254083	20.732	10
	1200	Tb927.11.10240	Tb927.11.10240		hslVU complex proteolytic subunit, putative,hslVU complex proteolytic subunit, threonine peptidase, Clan T(1), family T1B	22.684	36.4	0	41.522	1	1		1	-0.28866	0.0386265	1.41311	+	36.4	7	7	0.769231	-0.378512	75.44	18	36.4	7	7	0.883314	-0.179001	12.117	15	36.4	7	7	0.8075	-0.308466	32.121	19
	2617	Tb927.5.1060	Tb927.5.1060		mitochondrial processing peptidase, beta subunit, putative,metallo-peptidase, Clan ME, Family M16	54.122	82.2	0	323.31	1	1		1	-0.288457	0.0249164	1.60352	+	80.8	27	27	0.792017	-0.336398	11.303	109	80.8	27	27	0.793714	-0.333309	14.374	114	64.2	22	22	0.87317	-0.195666	7.9467	69
	2669	Tb927.5.2100	Tb927.5.2100	RBP30	hypothetical protein, conserved	49.665	8.2	0	6.6867	1	1		1	-0.287299	0.0174731	1.75763	+	6.7	2	2	0.778877	-0.360533	9.6126	3	6.7	2	2	0.828638	-0.271187	10.588	4	8.2	3	3	0.85253	-0.230177	20.216	5
	3609	Tb927.8.6080	Tb927.8.6080		hypothetical protein, conserved	38.08	43.8	0	118.58	1	1		1	-0.280047	0.0434229	1.36228	+	39.6	12	12	0.856458	-0.223546	7.5844	24	39.6	12	12	0.757518	-0.400647	9.0404	25	40.5	12	12	0.86098	-0.215948	13.071	24
	2288	Tb927.3.3900	Tb927.3.3900	CPT II	carnitine O-palmitoyltransferase II, putative (CPT II)	67.395	62.2	0	323.31	1	1		1	-0.278315	0.00322156	2.49193	+	62.2	31	31	0.810241	-0.303576	12.038	78	61.5	29	29	0.841397	-0.249142	11.684	62	55.6	28	28	0.82232	-0.282228	15.875	63
	1355	Tb927.11.13280	Tb927.11.13280	GBP25	mitochondrial RNA binding protein 2 (GBP25)	25.106	60.7	0	110.91	1	1		1	-0.278156	0.0443048	1.35355	+	56.7	11	11	0.75861	-0.398569	17.792	34	50.4	10	10	0.852878	-0.229588	9.4263	31	29.5	7	7	0.86675	-0.206312	10.684	23
	3036	Tb927.7.1080	Tb927.7.1080		hypothetical protein, conserved	40.968	34.2	0	91.184	1	1		1	-0.277307	0.00934196	2.02956	+	28.9	8	8	0.795418	-0.330214	22.251	12	34.2	9	9	0.835003	-0.260146	25.709	12	28.9	7	7	0.84583	-0.24156	23.328	12
	2201	Tb927.3.2150	Tb927.3.2150		protein phosphatase 2C, putative	40.009	51.1	0	59.275	1	1			-0.272929	0.00506234	2.29565	+	47.2	11	11	0.806517	-0.310224	18.276	22	41.2	10	10	0.832709	-0.264116	18.022	22	18.5	6	6	0.84414	-0.244446	10.215	15
	2092	Tb927.2.4590;Tb927.2.4610;Tb11.v5.0820	Tb927.2.4590;Tb927.2.4610;Tb11.v5.0820		branched-chain amino acid aminotransferase, putative;branched-chain amino acid aminotransferase, putative;branched-chain amino acid aminotransferase, putative	40.432	72.8	0	308.38	3	1		1	-0.270983	0.0313925	1.50317	+	63.8	19	19	0.823791	-0.27965	8.9297	45	72.8	20	20	0.881601	-0.181802	12.22	46	43.3	13	13	0.78377	-0.351498	12.743	28
	899	Tb927.10.4000	Tb927.10.4000		methylglutaconyl-CoA hydratase, mitochondrial precursor, putative	29.195	40.1	0	38.532	1	1		1	-0.270525	0.00381435	2.41858	+	36.1	9	9	0.822301	-0.282262	19.113	15	37.2	9	9	0.81686	-0.291839	49.432	15	29.2	6	6	0.84823	-0.237473	18.524	9
	1664	Tb927.11.3290	Tb927.11.3290	p166	hypothetical protein, conserved (p166)	166.26	10.5	0	30.482	1	1		1	-0.268307	0.0157946	1.80149	+	6.9	8	8	0.84246	-0.24732	30.269	10	5.7	7	7	0.857045	-0.222557	44.702	7	5.4	7	7	0.79276	-0.335044	19.16	9
	2730	Tb927.5.3390	Tb927.5.3390		ADG1, pseudogene	13.175	25.4	0	23.944	1	1			-0.268136	0.0430764	1.36576	+	25.4	3	3	0.898473	-0.154454	16.21	7	25.4	3	3	0.806842	-0.309642	3.4167	6	25.4	3	3	0.78987	-0.340313	30.607	4
	3390	Tb927.8.1740	Tb927.8.1740	TbTim62	hypothetical protein, conserved	62.143	53.2	0	164.47	1	1		1	-0.263394	0.0156858	1.80449	+	49.9	19	19	0.795482	-0.330099	13.31	42	44.6	17	17	0.854044	-0.227618	30.901	35	28.3	11	11	0.85118	-0.232464	20.923	19
	2331	Tb927.3.4920	Tb927.3.4920		LETM1 and EF-hand domain-containing protein 1, putative	42.737	74.3	0	120.01	1	1			-0.259822	0.00179851	2.74509	+	54.8	16	16	0.825151	-0.277271	35.435	24	65.1	17	17	0.847099	-0.239398	15.668	26	36.5	10	10	0.83347	-0.262798	15.137	16
	2136	Tb927.2.6070	Tb927.2.6070	MRB6070	mitochondrial RNA binding complex 1 subunit (MRB6070)	31.486	31.6	0	53.729	1	1		1	-0.259554	0.0374543	1.4265	+	26.7	7	7	0.783024	-0.352871	4.9916	13	26.7	7	7	0.840054	-0.251446	7.3125	12	25.6	7	7	0.88617	-0.174345	11.807	15
	879	Tb927.10.3570;Tb11.v5.1042	Tb927.10.3570	KREX2	KREX2 (KREX2)	99.416	33.6	0	85.026	2	1		1	-0.259433	0.043427	1.36224	+	26.7	16	16	0.778695	-0.36087	13.227	23	28.1	17	17	0.890076	-0.168	27.653	25	21.1	13	13	0.84123	-0.249428	16.894	16
	2774	Tb927.5.520	Tb927.5.520		stomatin-like protein, putative	55.979	34.7	0	168.51	1	1		1	-0.253876	0.0196831	1.70591	+	33.1	15	15	0.816727	-0.292075	17.756	30	33	15	15	0.819068	-0.287945	9.909	27	23.5	12	12	0.88172	-0.181608	9.2898	19
	590	Tb927.10.12700	Tb927.10.12700		pyruvate dehydrogenase E1 alpha subunit, putative	42.511	87	0	323.31	1	1		1	-0.251527	0.0246662	1.6079	+	84.1	32	32	0.845023	-0.242938	9.3826	122	84.1	31	31	0.878735	-0.186501	9.7154	116	86.5	32	32	0.79822	-0.325142	17.03	86
	952	Tb927.10.5540	Tb927.10.5540		hypothetical protein, conserved	30.445	24.7	0	8.6399	1	1		1	-0.250141	0.0213461	1.67068	+	24.7	4	4	0.847817	-0.238175	30.661	5	12.5	3	3	0.801282	-0.319618	34.76	3	10	2	2	0.87501	-0.192629	13.612	5
	2875	Tb927.6.2420	Tb927.6.2420		p22 protein precursor	25.349	54.2	0	155.78	1	1			-0.246158	0.00169388	2.77112	+	54.2	9	9	0.83167	-0.265917	9.7357	33	54.2	9	9	0.851281	-0.232292	5.4095	32	49.8	8	8	0.84659	-0.240265	21.365	26
	3121	Tb927.7.2710	Tb927.7.2710		NADH-cytochrome b5 reductase, putative	31.885	40.8	0	65.156	1	1			-0.244153	0.0373163	1.4281	+	38	10	10	0.808538	-0.306612	13.594	21	40.8	11	11	0.825151	-0.277271	4.6705	22	35.2	8	8	0.90214	-0.148577	11.73	15
	3406	Tb927.8.1990	Tb927.8.1990	TRYP2	peroxidoxin (TRYP2)	25.631	65.9	0	125.61	1	1		1	-0.242505	0.00287074	2.54201	+	65.9	14	14	0.841609	-0.248778	24.602	56	60.6	13	13	0.860067	-0.217479	3.7403	55	60.6	13	13	0.83436	-0.261258	76.804	41
	4040	Tb927.9.7260	Tb927.9.7260		hypothetical protein, conserved	41.248	30.1	0	19.557	1	1		1	-0.239777	0.0392612	1.40604	+	24	5	5	0.824266	-0.278817	55.061	7	30.1	6	6	0.905961	-0.142479	34.668	9	10.7	3	3	0.81336	-0.298034	13.528	4
	370	Tb927.1.1000	Tb927.1.1000		developmentally regulated phosphoprotein	47.206	33.1	0	38.779	1	1		1	-0.239215	0.0358804	1.44514	+	12.9	5	5	0.834028	-0.261832	15.794	6	18.1	6	6	0.901469	-0.14965	8.3357	9	19.8	6	6	0.80879	-0.306163	33.525	7
	713	Tb927.10.14840;Tb927.10.14830;Tb927.10.14820	Tb927.10.14840;Tb927.10.14830;Tb927.10.14820	MCP5a	mitochondrial carrier protein (MCP5a);mitochondrial carrier protein (MCP5b);mitochondrial carrier protein,ADP/ATP translocase 1, putative (MCP5c)	34.074	58.3	0	200.48	3	1	1		-0.237589	0.0344367	1.46298	+	54.1	17	17	0.822368	-0.282143	8.63	87	58.3	18	18	0.821558	-0.283566	12.227	99	43	15	15	0.90309	-0.147058	55.16	62
	3129	Tb927.7.280	Tb927.7.280	PPIase	cyclophilin-type peptidyl-prolyl cis-trans isomerase, putative (PPIase)	24.302	76	0	148	1	1			-0.236831	0.0490167	1.30966	+	76	12	12	0.811688	-0.301002	14.384	27	76	12	12	0.823045	-0.280956	6.4994	29	72	11	11	0.91476	-0.128535	4.3905	26
	1719	Tb927.11.4320	Tb927.11.4320		hypothetical protein, conserved	51.878	57.1	0	197.01	1	1			-0.228979	0.00213209	2.67119	+	57.1	20	20	0.848608	-0.236829	22.696	40	50.7	17	17	0.865726	-0.208018	42.013	33	48	14	14	0.84552	-0.242089	20.543	22
	2169	Tb927.3.1600	Tb927.3.1600	Tim10	hypothetical protein, conserved	11.872	65.7	0	46.458	1	1		1	-0.226272	0.0360116	1.44356	+	65.7	5	5	0.804117	-0.314523	9.6517	7	65.7	5	5	0.882613	-0.180148	10.995	10	65.7	5	5	0.88017	-0.184146	18.998	10
	2568	Tb927.4.4910	Tb927.4.4910		3,2-trans-enoyl-CoA isomerase, mitochondrial precursor, putative	45.333	35	0	55.735	1	1		1	-0.22103	0.0210707	1.67632	+	35	10	7	0.83382	-0.262193	10.245	16	25.5	8	5	0.897102	-0.156655	16.839	14	25.5	8	5	0.84426	-0.244241	17.457	17
	2905	Tb927.6.3050	Tb927.6.3050		aldehyde dehydrogenase family, putative	59.689	34.6	0	131.75	1	1			-0.217843	0.00140722	2.85164	+	34.6	13	13	0.869338	-0.20201	9.3399	24	29.3	11	11	0.857265	-0.222186	8.2576	23	27.4	10	10	0.85303	-0.229332	12.819	19
	1452	Tb927.11.15040	Tb927.11.15040	Cpn60	chaperonin HSP60, mitochondrial precursor, putative,heat shock protein 60 (Cpn60)	64.159	59.1	0	281.52	1	1			-0.202746	0.0416915	1.37995	+	50.5	22	22	0.830703	-0.267596	17.009	46	47.6	18	18	0.918864	-0.122076	23.192	34	45.5	19	19	0.85942	-0.218565	12.74	30
	1136	Tb927.10.9120	Tb927.10.9120		hypothetical protein, conserved	27.299	16.9	0	6.4455	1	1			-0.195535	0.00635757	2.19671	+	16.9	2	2	0.874432	-0.193583	17.985	2	16.9	2	2	0.872068	-0.197488	NaN	1	0	0	0	NaN		NaN	0
	516	Tb927.10.11030	Tb927.10.11030	ATOM11	hypothetical protein, conserved	11.261	54	0	23.011	1	1			-0.192709	0.00928036	2.03243	+	49	4	4	0.857118	-0.222434	6.1292	5	49	4	4	0.872068	-0.197488	10.44	5	54	5	5	0.89614	-0.158204	8.4577	9
	2394	Tb927.3.950	Tb927.3.950		hypothetical protein, conserved	47.573	15.2	0	14.806	1	1		1	-0.189053	0.0409947	1.38727	+	15.2	4	4	0.852079	-0.230941	62.959	4	10.7	3	3	0.926526	-0.110096	13.759	4	8.6	2	2	0.85493	-0.226122	69.966	2
	1489	Tb927.11.15640	Tb927.11.15640	MERS1	mitochondrial RNA binding complex 1 subunit,NUDIX hydrolase, conserved	44.396	43.5	0	52.417	1	1		1	-0.188214	0.0119946	1.92101	+	35.4	10	10	0.87512	-0.192447	14.381	18	28.1	8	8	0.857412	-0.221939	11.411	13	23.3	8	8	0.90109	-0.150257	17.065	10
	2937	Tb927.6.3800;Tb927.6.3750;Tb927.6.3740	Tb927.6.3800;Tb927.6.3750;Tb927.6.3740		heat shock 70 kDa protein, mitochondrial precursor, putative;heat shock 70 kDa protein, mitochondrial precursor, putative;heat shock 70 kDa protein, mitochondrial precursor, putative	71.474	81.6	0	323.31	3	1		1	-0.186507	0.0247976	1.60559	+	79.9	48	47	0.843526	-0.245496	7.3805	311	78.8	49	48	0.891425	-0.165815	9.2297	318	69.6	45	44	0.90237	-0.148209	16.179	279
	4114	Tb927.9.9840	Tb927.9.9840	GCVH	lipoic acid containing carrier protein, putative (GCVH)	15.216	75.4	0	20.806	1	1		1	-0.186299	0.00505235	2.29651	+	73.2	6	6	0.890076	-0.168	54.475	18	75.4	7	7	0.88347	-0.178746	24.948	14	75.4	7	7	0.86325	-0.21215	24.784	17
	1580	Tb927.11.190	Tb927.11.190		elongation factor, putative	72.602	66.5	0	204.99	1	1		1	-0.183668	0.0052587	2.27912	+	56.5	27	27	0.891583	-0.165558	11.821	54	55.9	26	26	0.864678	-0.209765	90.083	51	47.3	21	21	0.88535	-0.17568	20.029	42
	1778	Tb927.11.5390	Tb927.11.5390	Tim8-13	hypothetical protein, conserved	9.795	69.9	0	54.553	1	1			-0.176192	0.00530534	2.27529	+	69.9	4	4	0.889442	-0.169027	2.8019	11	69.9	4	4	0.896057	-0.158337	3.0204	12	53	3	3	0.86982	-0.201211	9.9227	9
	2640	Tb927.5.1520	Tb927.5.1520		heat shock protein HslVU, ATPase subunit HslU, putative	52.53	60.8	0	278.3	1	1		1	-0.175921	0.0119479	1.92271	+	59.4	23	23	0.862069	-0.214125	27.287	59	59.4	22	22	0.893336	-0.162726	9.61	57	51.6	21	21	0.90068	-0.150914	29.1	51
	934	Tb927.10.5010	Tb927.10.5010	EF-G1	Mitochondrial elongation factor G, putative	83.982	54.3	0	249.57	1	1		1	-0.169204	0.0397554	1.4006	+	45	23	23	0.855798	-0.224658	20.131	47	47.3	26	26	0.884017	-0.177854	47.646	51	45.4	25	25	0.92974	-0.105101	16.627	42
	2238	Tb927.3.2980	Tb927.3.2980	MCP17	mitochondrial carrier protein (MCP17)	31.127	11.8	0	5.5355	1	1	1		-0.167228	0.0068472	2.16449	+	8.3	1	1	0.889442	-0.169027	11.519	2	11.8	2	2	0.891663	-0.16543	6.714	3	0	0	0	NaN		NaN	0
	3998	Tb927.9.5900	Tb927.9.5900	GDH	glutamate dehydrogenase (GDH)	112.11	67.7	0	323.31	1	1		1	-0.165726	0.0102449	1.98949	+	66.7	62	62	0.911411	-0.133827	10.566	249	67.7	62	62	0.887626	-0.171975	9.3115	257	58.1	53	53	0.87577	-0.191376	12.64	172
	2066	Tb927.2.3910	Tb927.2.3910		beta-ketoacyl synthase family protein, putative	52.044	10	0	5.9749	1	1		1	-0.146955	0.0128343	1.89163	+	8.6	2	2	0.885426	-0.175557	6.278	2	8.6	2	2	0.902527	-0.147958	21.984	2	5.6	2	2	0.92188	-0.117349	50.674	3
	2180	Tb927.3.1790	Tb927.3.1790		pyruvate dehydrogenase E1 beta subunit, putative	37.566	73.9	0	323.31	1	1		1	-0.133359	0.0161215	1.79259	+	73.9	22	22	0.912992	-0.131326	10.197	73	71.6	21	21	0.929973	-0.104739	16.592	77	56.6	19	19	0.89254	-0.164011	64.759	62
	1790	Tb927.11.5600	Tb927.11.5600	ATOM14	hypothetical protein, conserved	13.577	50.4	0	78.906	1	1			-0.116343	0.0280044	1.55277	+	50.4	6	6	0.918864	-0.122076	7.4451	22	50.4	6	6	0.902772	-0.147567	9.6555	21	50.4	6	6	0.94646	-0.0793865	4.6494	15
	3166	Tb927.7.3500	Tb927.7.3500		glutathione-S-transferase/glutaredoxin, putative	35.436	53.8	0	158.15	1	1		1	-0.102884	0.0329254	1.48247	+	51.6	14	14	0.94038	-0.0886844	22.775	37	51.3	13	13	0.90703	-0.140779	12.725	34	48.1	13	13	0.94659	-0.0791884	15.993	29
	2200	Tb927.3.2130	Tb927.3.2130		hypothetical protein, conserved	81.531	18.1	0	32.315	1	1		1	-0.0857748	0.0126906	1.89652	+	14.3	6	6	0.929627	-0.105276	11.169	10	14.5	6	6	0.949037	-0.0754641	20.773	9	3.8	1	1	0.9483	-0.0765846	NaN	1
	938	Tb927.10.510;Tb11.v5.0374	Tb927.10.510;Tb11.v5.0374		hypothetical protein, conserved;hypothetical protein, conserved	37.06	50.6	0	117.15	2	1			-0.0776182	0.00792104	2.10122	+	50.6	13	13	0.939585	-0.0899048	13.776	22	34.1	9	9	0.955384	-0.065848	36.895	17	25.4	8	8	0.94796	-0.0771019	20.97	14
	1795	Tb927.11.5760	Tb927.11.5760		hypothetical protein, conserved	36.516	20.8	0	6.5554	1	1		1	-0.0765816	0.000359794	3.44395	+	20.8	3	3	0.94688	-0.0787464	69.129	4	10.6	2	2	0.950119	-0.0738202	39.321	3	10.6	2	2	0.94791	-0.0771781	9.4414	2
	3950	Tb927.9.3780	Tb927.9.3780		hypothetical protein, conserved	9.2288	87.2	0	45.393	1	1		1	-0.0610813	0.0338394	1.47058	+	59.3	2	2	0.960707	-0.0578315	12.525	4	87.2	3	3	0.956389	-0.0643311	15.598	5	0	0	0	NaN		NaN	0
	1288	Tb927.11.11780	Tb927.11.11780		acyl-CoA dehydrogenase, putative	66.634	24.1	0	85.954	1	1		1	-0.0552141	0.0102797	1.98802	+	17.1	6	6	0.965251	-0.051024	9.4575	6	19.4	7	7	0.967118	-0.0482362	12.608	7	9.4	4	4	0.95503	-0.0663821	9.6268	5
	450	Tb927.1.4480	Tb927.1.4480		hypothetical protein, conserved	158.45	1	0.0023401	2.2396	1	1			0.270318	0.00857784	2.06662	+	1	1	1	1.18188	0.241083	14.89	2	1	1	1	1.24875	0.320486	NaN	1	1	1	1	1.1887	0.249385	16.421	2
	3798	Tb927.9.12510	Tb927.9.12510	DED1	ATP-dependent DEAD/H RNA helicase, putative (DED1)	82.74	58.2	0	323.31	1	1			0.297579	0.0206326	1.68545	+	54.8	36	35	1.30149	0.380164	26.838	85	56.2	38	37	1.17531	0.23304	19.935	76	49.4	33	32	1.2138	0.279531	22.811	77
	2620	Tb927.5.1090	Tb927.5.1090		threonyl-tRNA synthetase, putative	90.983	70.8	0	285.86	1	1			0.368431	0.0136347	1.86535	+	69.7	44	44	1.36195	0.445676	13.956	89	66	42	42	1.22711	0.29527	15.68	83	50.6	31	31	1.2873	0.364348	20.327	64
	3981	Tb927.9.5210	Tb927.9.5210		glutaminyl-tRNA synthetase, putative	67.278	34.8	0	64.534	1	1			0.482592	0.014346	1.84327	+	31.9	15	15	1.50602	0.590745	20.589	30	23.7	11	11	1.31055	0.390169	11.314	24	30.2	13	13	1.3821	0.466862	13.182	17
	2138	Tb927.2.820	Tb927.2.820		retrotransposon hot spot protein (RHS, pseudogene), putative,retrotransposon hot spot protein 1 (RHS1), interrupted	60.527	51.6	0	110.56	1	1			0.520771	0.0314363	1.50257	+	47.6	20	3	1.60658	0.683993	5.1007	4	43.8	19	3	1.43589	0.52195	15.99	4	34.5	16	4	1.2802	0.356369	13.657	4
	1959	Tb927.11.9150	Tb927.11.9150		hypothetical protein, conserved	191.13	3.8	0	17.207	1	1		1	-0.265529	0.0501494	1.29973		3.2	4	4	0.766695	-0.383276	15.688	8	3.4	4	4	0.84717	-0.239276	20.974	5	1.4	2	2	0.88636	-0.174035	11.1	3
	2541	Tb927.4.4210	Tb927.4.4210		ATP-dependent zinc metallopeptidase, putative,metallo-peptidase, Clan MA(E) Family M41	96.221	39.9	0	211.92	1	1		1	-0.356415	0.051147	1.29118		30.1	16	16	0.695459	-0.523963	18.955	25	24.9	13	13	0.831532	-0.266157	13.948	21	27	16	16	0.82409	-0.279126	21.551	25
	881	Tb927.10.3590	Tb927.10.3590		hypothetical protein, conserved	62.825	12.3	0	13.807	1	1			-0.505665	0.0511852	1.29086		6.1	3	3	0.67861	-0.559345	10.446	6	12.3	5	5	0.824742	-0.277985	14.045	8	2	1	1	0.62431	-0.679665	3.3047	2
	2293	Tb927.3.4030	Tb927.3.4030		hypothetical protein, conserved	135.25	17.1	0	46.985	1	1		1	-0.186582	0.0512681	1.29015		13.6	10	10	0.834655	-0.260748	14.422	11	12.5	9	9	0.927472	-0.108625	9.8164	11	8.9	7	7	0.87638	-0.190371	10.421	9
	3913	Tb927.9.2450	Tb927.9.2450		electon transport protein SCO1/SCO2, putative	44.135	14.2	0	17.26	1	1			-0.59635	0.0513766	1.28923		9.3	2	2	0.78796	-0.343806	37.817	3	14.2	3	3	0.652784	-0.615322	28.48	3	5.7	1	1	0.56256	-0.829921	NaN	1
	174	Tb11.0400;Tb927.11.7700;Tb11.0300	Tb11.0400;Tb927.11.7700;Tb11.0300	P27	P27 protein, putative (P27);hypothetical protein;hypothetical protein,chrXI additional, unordered contigs	27.701	62.7	0	85.157	3	1			-0.877539	0.0519877	1.2841		59.8	11	11	0.621813	-0.685447	6.4883	35	62.7	12	12	0.407897	-1.29372	6.8096	32	53.5	10	10	0.63576	-0.653446	41.743	19
	2844	Tb927.6.1890	Tb927.6.1890		hypothetical protein, conserved	68.047	24.9	0	29.941	1	1		1	-0.502313	0.0524077	1.2806		21.3	8	8	0.621581	-0.685985	31.31	10	19.3	7	7	0.686059	-0.543595	19.875	10	12.1	5	5	0.8251	-0.277359	31.779	7
	2164	Tb927.3.1410	Tb927.3.1410	COXVII	cytochrome oxidase subunit VII (COXVII)	19.264	76.4	0	70.917	1	1		1	-0.9391	0.052707	1.27813		68.5	9	9	0.634196	-0.657	14.747	19	69.7	9	9	0.383465	-1.38283	18.986	17	50.9	6	6	0.58339	-0.777467	11.529	11
	1130	Tb927.10.900	Tb927.10.900		hypothetical protein, conserved	19.158	16.4	0	3.8824	1	1		1	-0.724502	0.0527383	1.27787		16.4	2	2	0.509165	-0.973795	2.8011	2	16.4	2	2	0.571004	-0.808426	19.118	3	16.4	2	2	0.76245	-0.391285	20.945	2
	2773	Tb927.5.510	Tb927.5.510		hypothetical protein, conserved	14.154	18.1	0	9.0243	1	1		1	-0.769258	0.0531498	1.2745		18.1	2	2	0.458905	-1.12373	4.5684	7	18.1	2	2	0.706414	-0.501414	47.775	6	18.1	2	2	0.62303	-0.682626	12.755	7
	2377	Tb927.3.700	Tb927.3.700		hypothetical protein, conserved	9.1377	18.8	0	7.8362	1	1		1	-1.29356	0.0533065	1.27322		18.8	1	1	0.438443	-1.18954	1.7898	4	18.8	1	1	0.272235	-1.87708	9.9784	4	18.8	1	1	0.56878	-0.814057	NaN	1
	1763	Tb927.11.5090	Tb927.11.5090		aspartate aminotransferase, mitochondrial	45.993	66.9	0	111.48	1	1			-0.457608	0.0546799	1.26217		57.6	15	14	0.848176	-0.237564	14.944	26	58.5	16	15	0.690226	-0.534858	11.009	26	45.8	11	10	0.65957	-0.600402	26.764	13
	3942	Tb927.9.3590;Tb11.v5.0904	Tb927.9.3590;Tb11.v5.0904		monothiol glutaredoxin, putative;glutaredoxin-like protein, putative	20.43	63.6	0	76.218	2	1		1	-0.404393	0.0547645	1.2615		58.7	8	8	0.659022	-0.601602	13.399	12	58.7	9	9	0.814001	-0.296898	16.114	15	57.1	9	9	0.80403	-0.314679	33.841	11
	4104	Tb927.9.9660	Tb927.9.9660	ATOM40	hypothetical protein, conserved	38.295	73.5	0	323.31	1	1			-0.218047	0.0549094	1.26035		73.5	20	20	0.810373	-0.303342	13.074	57	69.8	20	20	0.852152	-0.230818	9.0533	45	30.8	11	11	0.9202	-0.119981	6.8902	27
	755	Tb927.10.15660	Tb927.10.15660		hypothetical protein, conserved	85.608	25.4	0	57.667	1	1		1	-0.348955	0.0552206	1.2579		21.2	9	9	0.701459	-0.511569	17.396	9	16	8	8	0.80444	-0.313942	13.641	10	15.4	8	8	0.85776	-0.221354	19.732	9
	2327	Tb927.3.4850	Tb927.3.4850		enoyl-CoA hydratase, mitochondrial precursor, putative	28.605	63.3	0	87.938	1	1		1	-0.405428	0.0552669	1.25754		59.9	12	12	0.723118	-0.467697	22.782	18	41.6	9	9	0.864155	-0.210638	35.968	15	21.3	5	5	0.68875	-0.537948	7.5661	8
	2495	Tb927.4.3070	Tb927.4.3070		hypothetical protein, conserved	51.431	14.1	0	10.903	1	1		1	-0.587499	0.0556387	1.25462		11.6	4	4	0.572312	-0.805127	18.412	5	11.6	4	4	0.64	-0.643856	19.961	5	6.9	3	3	0.80468	-0.313513	20.501	3
	1373	Tb927.11.13600	Tb927.11.13600		hypothetical protein, conserved	40.402	14.7	0	23.457	1	1		1	-0.52682	0.0562652	1.24976		14.7	5	5	0.819807	-0.286645	25.805	8	14.7	5	5	0.679117	-0.558268	11.644	8	14.4	4	4	0.60059	-0.735548	56.296	4
	761	Tb927.10.15790	Tb927.10.15790		hypothetical protein, conserved	16.775	24.1	0	9.9852	1	1			-0.657824	0.0578277	1.23786		24.1	2	2	0.543331	-0.880098	6.4884	3	24.1	2	2	0.590912	-0.758985	14.932	3	24.1	2	2	0.79312	-0.334389	10.554	2
	2884	Tb927.6.2610	Tb927.6.2610		hypothetical protein, conserved	11.414	22.1	0	3.9029	1	1		1	-0.152883	0.0579768	1.23675		22.1	2	2	0.901551	-0.14952	7.9223	2	22.1	2	2	0.857854	-0.221197	18.064	2	9.5	1	1	0.94087	-0.0879326	12.729	2
	1877	Tb927.11.7170	Tb927.11.7170		seryl-tRNA synthetase	53.857	65.1	0	235.73	1	1			0.22168	0.0584346	1.23333		59.1	22	22	1.24429	0.315325	13.25	32	57.2	20	20	1.17145	0.2283	16.264	37	48.2	17	17	1.0878	0.121413	15.104	33
	3471	Tb927.8.3380	Tb927.8.3380		electron transfer protein, putative	27.259	47.5	0	43.668	1	1		1	-0.651606	0.0585972	1.23212		28.9	5	5	0.582242	-0.78031	4.1593	6	40.1	7	7	0.55457	-0.850559	19.305	7	31.8	7	7	0.79888	-0.323949	32.853	11
	1773	Tb927.11.5290	Tb927.11.5290	MCP9	mitochondrial carrier protein (MCP9)	29.883	44	0	58.284	1	1	1		-0.276236	0.0593906	1.22628		41.1	9	9	0.761209	-0.393636	10.514	15	44	10	10	0.901307	-0.14991	17.338	19	28.7	8	8	0.82065	-0.285161	9.2501	10
	3268	Tb927.7.5820	Tb927.7.5820		Monooxygenase, putative	55.086	22.1	0	18.949	1	1		1	-0.212054	0.059526	1.22529		18.6	7	7	0.800833	-0.320427	20.581	12	18.6	7	7	0.896138	-0.158208	18.624	9	12.8	6	6	0.89656	-0.157528	43.322	8
	627	Tb927.10.13360	Tb927.10.13360	EF-Tu	elongation factor Tu, putative	51.849	78.9	0	323.31	1	1		1	-0.225759	0.0599324	1.22234		77.4	30	30	0.875964	-0.191057	9.3588	88	77.4	30	30	0.790701	-0.338795	14.718	74	60.9	24	24	0.90286	-0.147426	15.787	60
	2482	Tb927.4.2700	Tb927.4.2700		hydroxymethylglutaryl-CoA synthase, putative	47.272	19	0	12.552	1	1		1	-0.557105	0.0610041	1.21464		13.2	3	3	0.578804	-0.788853	2.1822	3	16.9	4	4	0.664275	-0.590147	20.796	4	8.1	2	2	0.81659	-0.292316	10.861	2
	1964	Tb927.11.9280	Tb927.11.9280		hypothetical protein, conserved	74.128	10.8	0	11.803	1	1		1	-0.597276	0.0612078	1.21319		9	5	5	0.557662	-0.842536	21.771	6	7.6	4	4	0.642261	-0.638769	23.156	4	10.8	6	6	0.80635	-0.310522	22.876	7
	1435	Tb927.11.14700	Tb927.11.14700		hypothetical protein, conserved	61.94	26.3	0	36.604	1	1		1	-0.334643	0.0612807	1.21268		16.5	7	7	0.725374	-0.463204	16.364	9	26.3	10	10	0.772917	-0.371615	37.847	12	15.2	6	6	0.88939	-0.169112	25.897	9
	2608	Tb927.4.840	Tb927.4.840		hypothetical protein, conserved	45.618	14.3	0	14.495	1	1			-0.146741	0.0613597	1.21212		14.3	5	5	0.857412	-0.221939	14.222	8	11.7	4	4	0.920133	-0.120086	5.0118	7	8.3	3	3	0.9342	-0.0981966	17.742	4
	3334	Tb927.7.7410	Tb927.7.7410		oxidoreductase, putative	35.787	51	0	79.978	1	1		1	-0.290043	0.0613806	1.21197		43.3	11	11	0.7373	-0.439676	21.901	20	37.3	9	9	0.852006	-0.231064	21.309	17	19.7	5	5	0.87092	-0.199388	12.47	8
	4069	Tb927.9.8410	Tb927.9.8410		chaperone protein DNAj, putative	35.594	53	0	155.16	1	1			-0.197094	0.061604	1.21039		46.7	13	13	0.825696	-0.276318	11.02	36	53	13	13	0.862143	-0.214	12.548	25	41.9	12	12	0.93241	-0.100964	10.564	28
	939	Tb927.10.5110	Tb927.10.5110	KREPA4	KREPA4 (KREPA4)	23.697	13.3	0	4.9353	1	1		1	-0.514538	0.0617814	1.20914		13.3	2	2	0.626174	-0.675364	3.2834	3	13.3	2	2	0.842034	-0.248049	52.786	3	13.3	2	2	0.65058	-0.620202	26.647	2
	2182	Tb927.3.1810	Tb927.3.1810		hypothetical protein, conserved	36.117	35.6	0	16.445	1	1		1	-0.565631	0.0627784	1.20219		32.5	5	5	0.552883	-0.854953	13.942	9	35.6	6	6	0.71623	-0.481506	20.966	14	21.2	3	3	0.77893	-0.360434	95.908	5
	837	Tb927.10.280	Tb927.10.280	COXVI	cytochrome oxidase subunit VI (COXVI)	19.154	72.2	0	32.137	1	1			-0.722188	0.0627828	1.20216		72.2	9	9	0.69633	-0.522156	12.678	18	44.9	6	6	0.465853	-1.10205	11.313	11	46.2	7	7	0.68665	-0.542353	26.003	12
	1436	Tb927.11.14730	Tb927.11.14730		metalloprotease, putative,cell division protein FtsH homologue, putative	74.475	51.7	0	150.39	1	1			-0.205216	0.0632415	1.199		46.8	25	25	0.805023	-0.312898	13.701	49	47	25	25	0.907276	-0.140386	21.67	54	30.7	18	18	0.89356	-0.162364	26.715	39
	880	Tb927.10.3580	Tb927.10.3580		hypothetical protein, conserved	35.612	13	0	7.691	1	1		1	-0.591319	0.0638384	1.19492		7.1	2	2	0.691181	-0.532866	14.703	3	7.1	2	2	0.782779	-0.353323	22.214	2	13	3	3	0.54045	-0.887767	62.137	4
	2953	Tb927.6.4090	Tb927.6.4090	HSP60	chaperonin HSP60, mitochondrial precursor, putative (HSP60)	58.37	46	0	150.1	1	1		1	-0.279461	0.0657623	1.18202		37	15	15	0.756716	-0.402176	17.124	26	38.4	16	16	0.906208	-0.142087	13.221	27	44	17	17	0.81557	-0.294119	21.141	27
	3288	Tb927.7.640	Tb927.7.640		hypothetical protein, conserved	37.365	33.8	0	110.76	1	1		1	-0.360763	0.0659446	1.18082		19.8	6	6	0.780884	-0.35682	6.962	12	30.5	7	7	0.874279	-0.193835	4.0028	12	19.2	6	6	0.69177	-0.531636	18.012	13
	1167	Tb927.10.9820;Tb11.v5.0565	Tb927.10.9820;Tb11.v5.0565		mitochondrial intermediate peptidase, putative,metallo-peptidase, Clan MA(E) Family M3;mitochondrial intermediate peptidase, putative	76.732	54.1	0	244.06	2	1		1	-0.281724	0.0659572	1.18074		51.4	24	24	0.749794	-0.415434	9.8363	49	48.9	22	22	0.824674	-0.278104	21.892	40	44.4	21	21	0.90023	-0.151634	17.997	36
	2956	Tb927.6.4180	Tb927.6.4180		hypothetical protein, conserved	16.327	45	0	9.9611	1	1			0.121582	0.0662863	1.17858		45	4	4	1.07839	0.108876	22.087	5	28.9	3	3	1.09755	0.134287	3.6896	3	0	0	0	NaN		NaN	0
	3741	Tb927.9.10580	Tb927.9.10580		3-demethylubiquinone-9 3-methyltransferase, putative	31.206	22.9	0	39.382	1	1		1	-0.307084	0.0670905	1.17334		15.3	4	4	0.720513	-0.472904	6.9644	5	19.4	6	6	0.843526	-0.245496	22.036	8	12.5	3	3	0.86883	-0.202854	7.3197	3
	2594	Tb927.4.600	Tb927.4.600		hypothetical protein, conserved	34.458	61.8	0	219.24	1	1		1	-0.298291	0.0672337	1.17241		61.8	12	12	0.727749	-0.458487	13.332	20	61.8	12	12	0.844167	-0.2444	17.681	21	32.5	7	7	0.8754	-0.191986	17.293	9
	1395	Tb927.11.13910	Tb927.11.13910		hypothetical protein, conserved	28.921	34	0	18.449	1	1		1	-0.254312	0.0672775	1.17213		24.2	4	4	0.795988	-0.329181	6.5865	4	22.3	4	4	0.801989	-0.318346	10.632	6	9.8	2	2	0.92312	-0.11541	12.478	2
	744	Tb927.10.15420	Tb927.10.15420		hypothetical protein, conserved	44.361	36.7	0	38.754	1	1		1	-0.296508	0.0677721	1.16895		34.4	8	8	0.747217	-0.420402	9.95	12	29.5	7	7	0.905551	-0.143132	44.064	11	19	5	5	0.79775	-0.325991	15.781	7
	163	Tb11.02.5070b;Tb927.11.7212	Tb11.02.5070b;Tb927.11.7212		hypothetical protein, conserved;hypothetical protein, conserved	32.082	11.7	0	17.834	2	1		1	-0.652602	0.0689062	1.16174		11.7	2	2	0.668181	-0.581689	43.624	3	11.7	2	2	0.60562	-0.723515	29.151	4	0	0	0	NaN		NaN	0
	270	Tb927.10.16150;Tb11.v5.0397	Tb927.10.16150;Tb11.v5.0397		ATP-dependent zinc metallopeptidase, putative;ATP-dependent zinc metallopeptidase, putative	62.779	23.9	0	75.522	2	1			-0.280325	0.0690001	1.16115		21.3	8	8	0.770001	-0.377068	19.623	12	22.7	8	8	0.791515	-0.337311	19.991	10	15.3	7	7	0.91599	-0.126596	19.265	7
	2389	Tb927.3.860	Tb927.3.860	ACP	acyl carrier protein,acyl carrier protein, mitochondrial precursor, putative (ACP)	16.531	31.1	0	85.553	1	1		1	-0.22517	0.06916	1.16014		21.6	3	3	0.807363	-0.30871	4.7155	15	31.1	4	4	0.931185	-0.10286	11.154	15	31.1	4	4	0.83281	-0.263941	6.9827	11
	1129	Tb927.10.8980	Tb927.10.8980		hypothetical protein, conserved	17.598	39.1	0	38.616	1	1		1	-0.601452	0.0692207	1.15976		39.1	7	7	0.595132	-0.748719	14.837	19	39.1	7	7	0.579341	-0.787516	32.278	20	38.5	6	6	0.8304	-0.268122	6.0814	14
	2726	Tb927.5.3340	Tb927.5.3340	TbTim11	hypothetical protein, conserved	11.094	48.4	0	41.179	1	1			-0.291177	0.0712133	1.14744		48.4	3	3	0.732977	-0.448161	8.1887	8	48.4	3	3	0.838153	-0.254715	26.444	6	35.8	2	2	0.88844	-0.170654	9.9662	4
	3188	Tb927.7.3910	Tb927.7.3910		hypothetical protein, conserved	57.602	15.9	0	15.029	1	1		1	-0.679701	0.0712366	1.1473		14.5	4	4	0.814001	-0.296898	25.382	5	11.5	3	3	0.538503	-0.892974	22.611	2	5.6	2	2	0.55508	-0.849232	4.0329	3
	2346	Tb927.3.5210	Tb927.3.5210		hypothetical protein, conserved	33.957	10.4	0.0089219	1.607	1	1			-0.365116	0.0713467	1.14663		10.4	2	2	0.760052	-0.395831	14.028	3	2.5	1	1	0.886918	-0.173128	13.285	3	2.5	1	1	0.69429	-0.52639	7.9904	3
	1284	Tb927.11.11730	Tb927.11.11730		MRP protein, putative	30.668	23.2	0	4.9302	1	1			-0.2156	0.071362	1.14653		14.4	3	3	0.93423	-0.09815	30.014	4	18.3	4	4	0.810964	-0.30229	25.667	4	9.5	2	2	0.84302	-0.246361	19.815	2
	1577	Tb927.11.180	Tb927.11.180		electron transfer flavoprotein, putative	29.949	32.3	0	39.449	1	1		1	-0.599109	0.0720832	1.14217		32.3	9	9	0.548366	-0.866789	6.4419	14	24.5	6	6	0.638447	-0.647361	11.242	11	21.6	6	6	0.82178	-0.283176	37.155	6
	1892	Tb927.11.7530	Tb927.11.7530		long-chain-fatty-acid-CoA ligase, putative	80.712	3.3	0	5.0889	1	1			-0.643056	0.0723764	1.1404		1.9	1	1	0.824402	-0.27858	NaN	1	1.4	1	1	0.576469	-0.794686	NaN	1	1.4	1	1	0.55252	-0.855901	7.4985	2
	1814	Tb927.11.6100	Tb927.11.6100		hypothetical protein, conserved	33.374	14	0	6.1276	1	1		1	-0.12935	0.07251	1.1396		9.4	2	2	0.961169	-0.0571383	37.46	3	9.4	2	2	0.883704	-0.178364	19.138	4	9	2	2	0.89966	-0.152548	170.94	2
	1999	Tb927.11.9830	Tb927.11.9830		hypothetical protein, conserved	22.572	30.5	0	7.7016	1	1		1	-0.605053	0.0727125	1.13839		18.3	4	4	0.827404	-0.273337	37.743	5	26.4	4	4	0.553097	-0.854395	46.746	5	9.1	2	2	0.62096	-0.687428	6.9088	3
	494	Tb927.10.10400	Tb927.10.10400		hypothetical protein, conserved	37.867	13.5	0	12.364	1	1		1	-0.794048	0.0743961	1.12845		5.2	2	2	0.523862	-0.932742	3.3834	2	5.2	2	2	0.465289	-1.1038	6.3896	2	10.4	2	2	0.78698	-0.345601	26.443	2
	766	Tb927.10.16060	Tb927.10.16060		hypothetical protein, conserved	13.498	15.7	0	3.7622	1	1			-0.223098	0.0745535	1.12753		15.7	2	2	0.793273	-0.33411	14.536	3	15.7	2	2	0.855725	-0.224781	9.3385	4	7.8	1	1	0.92633	-0.110402	NaN	1
	3082	Tb927.7.210	Tb927.7.210		proline dehydrogenase	63.858	55.2	0	323.31	1	1		1	-0.249662	0.0746189	1.12715		55.2	26	26	0.852515	-0.230203	10.8	76	55.2	26	26	0.766577	-0.383497	6.2347	70	40.6	18	18	0.91049	-0.135285	7.797	44
	3542	Tb927.8.4950	Tb927.8.4950		kinesin, putative	165.15	30.4	0	104.89	1	1			-0.528055	0.0747675	1.12629		27	10	10	0.62081	-0.687777	21.828	17	28.2	12	12	0.626566	-0.674461	29.925	21	25.6	8	8	0.85742	-0.221926	29.106	18
	168	Tb11.02.5390b;Tb11.02.5390	Tb11.02.5390b;Tb11.02.5390		mRNA processing protein, putative;mRNA processing protein, putative	120.71	15.3	0	47.057	2	1		1	-0.264455	0.0749601	1.12517		11.6	9	9	0.835911	-0.258579	17.37	11	13.2	9	9	0.910996	-0.134484	22.22	11	10	7	7	0.7577	-0.400301	17.712	12
	2083	Tb927.2.4400	Tb927.2.4400		hypothetical protein, conserved	136.9	38	0	140.68	1	1		1	-0.308315	0.0751796	1.1239		33	24	24	0.723223	-0.467488	15.311	47	30.1	23	23	0.812084	-0.3003	17.109	39	17.4	14	14	0.89679	-0.157158	17.877	21
	1296	Tb927.11.11950	Tb927.11.11950		cytochrome oxidase assembly protein, putative	43.527	28.2	0	43.065	1	1		1	-0.213116	0.0752322	1.1236		22.6	6	6	0.802504	-0.31742	21.777	7	14.8	5	5	0.931185	-0.10286	31.016	6	6.4	2	2	0.85912	-0.219068	54.735	3
	2655	Tb927.5.1790	Tb927.5.1790		hypothetical protein, conserved	71.956	6.7	0	6.5467	1	1		1	-0.939783	0.0760473	1.11892		3.8	2	2	0.530955	-0.913339	12.896	2	3.8	2	2	0.718442	-0.477056	36.709	3	2.9	1	1	0.3714	-1.42895	NaN	1
	1898	Tb927.11.7780	Tb927.11.7780	ATOM46	hypothetical protein, conserved	46.237	53.5	0	236.66	1	1			-0.185081	0.0762409	1.11781		53.5	19	19	0.849979	-0.234501	13.533	49	48.7	16	16	0.844381	-0.244035	6.3813	43	47	15	15	0.94822	-0.0767062	14.831	34
	600	Tb927.10.12890	Tb927.10.12890		bifunctional aminoacyl-tRNA synthetase, putative	90.96	58.7	0	323.31	1	1		1	0.34018	0.0763535	1.11717		55.4	33	33	1.43563	0.52168	19.471	68	53.6	31	31	1.24953	0.321387	16.365	59	48.8	30	30	1.1309	0.177471	26.883	49
	2183	Tb927.3.1820	Tb927.3.1820	MRB1820	mitochondrial RNA binding complex 1 subunit (MRB1820)	25.432	45.7	0	67.413	1	1		1	-0.329677	0.0764107	1.11685		36.3	6	6	0.726744	-0.46048	22.769	11	39.2	7	7	0.764292	-0.387804	24.97	11	33.1	5	5	0.90705	-0.140746	7.4058	8
	2022	Tb927.2.1860	Tb927.2.1860	MRB1860	mitochondrial RNA binding complex 1 subunit (MRB1860)	96.551	9.1	0.00028744	3.4688	1	1			-0.574429	0.0765098	1.11628		7.1	3	3	0.53674	-0.897705	46.985	3	3.2	2	2	0.796115	-0.328951	28.876	3	2.4	2	2	0.70876	-0.496631	12.616	4
	3344	Tb927.7.840	Tb927.7.840		hypothetical protein, conserved	14.51	36.3	0	30.394	1	1		1	-0.591074	0.0776437	1.10989		36.3	5	5	0.636862	-0.650948	17.35	10	27.4	4	4	0.550995	-0.85989	14.647	7	25.8	3	3	0.83371	-0.262382	1.5671	6
	1515	Tb927.11.16120	Tb927.11.16120		hypothetical protein, conserved	67.926	3	0.00029061	3.6858	1	1		1	-0.19345	0.0778703	1.10863		3	1	1	0.889047	-0.169668	NaN	1	3	1	1	0.860215	-0.217231	NaN	1	0	0	0	NaN		NaN	0
	1597	Tb927.11.2220	Tb927.11.2220		hypothetical protein, conserved	50.086	7.9	0	8.4216	1	1		1	-0.463278	0.0780191	1.1078		7.9	3	3	0.625626	-0.676629	5.6052	5	7.9	3	3	0.703631	-0.50711	15.433	4	7.9	3	3	0.86688	-0.206096	11.741	5
	2277	Tb927.3.3660	Tb927.3.3660		hypothetical protein, conserved	29.594	27.3	0	11.733	1	1		1	-1.49923	0.0783668	1.10587		23.5	5	5	0.194284	-2.36376	73.939	5	9.1	3	3	0.545583	-0.874128	33.096	3	13.3	2	2	0.4176	-1.25981	25.886	2
	3811	Tb927.9.12850	Tb927.9.12850		hypothetical protein, conserved	66.991	3.1	0.0028468	2.1555	1	1		1	-0.931077	0.0794133	1.10011		3.1	1	1	0.41855	-1.25653	NaN	1	3.1	1	1	0.77101	-0.375179	NaN	1	3.1	1	1	0.44704	-1.16152	NaN	1
	1702	Tb927.11.3900	Tb927.11.3900		glycosyltransferase family-like protein, putative	31.198	36.7	0	35.503	1	1		1	-0.270616	0.07973	1.09838		36	7	7	0.829325	-0.269991	13.3	16	36	7	7	0.913826	-0.130008	8.017	13	10.5	3	3	0.75166	-0.411848	19.615	4
	3627	Tb927.8.6410	Tb927.8.6410		short-chain dehydrogenase, putative	52.913	19.4	0	22.71	1	1		1	-0.488097	0.0801099	1.09631		15.2	4	4	0.581869	-0.781234	5.9992	4	13.9	3	3	0.777001	-0.364012	17.416	5	12.4	3	3	0.8016	-0.319046	11.388	4
	484	Tb927.10.10160	Tb927.10.10160		hypothetical protein, conserved	42.907	18.6	0	7.5434	1	1			-0.986367	0.0811465	1.09073		18.6	4	4	0.625626	-0.676629	61.318	4	12.4	3	3	0.333256	-1.5853	59.37	4	2.8	1	1	0.61678	-0.697172	NaN	1
	2597	Tb927.4.630	Tb927.4.630		hypothetical protein, conserved	33.88	45.8	0	37.268	1	1		1	-0.164557	0.0812711	1.09006		39.2	9	9	0.914578	-0.128821	21.354	12	39.2	8	8	0.932053	-0.101516	46.477	13	42.5	9	9	0.83316	-0.263335	44.425	10
	724	Tb927.10.15010	Tb927.10.15010		lipoic acid synthetase, mitochondrial precursor, putative	45.476	16.4	0	16.432	1	1		1	-0.78264	0.0815472	1.08859		7.1	2	2	0.4182	-1.25773	29.21	3	16.4	4	4	0.701361	-0.511772	8.1057	6	10.3	2	2	0.6697	-0.578413	10.779	2
	3928	Tb927.9.3000	Tb927.9.3000		cytidine deaminase, putative	19.171	28.6	0	22.515	1	1		1	-0.217212	0.0817226	1.08766		23.1	2	2	0.934754	-0.0973411	28.382	4	20.9	2	2	0.853607	-0.228357	17.123	3	23.1	2	2	0.79778	-0.325937	12.635	3
	1206	Tb927.11.10340	Tb927.11.10340	pgam5	phosphoglycerate mutase family member 5, putative	33.783	26.3	0	26.111	1	1			-0.316255	0.0818395	1.08704		22.7	4	4	0.713878	-0.486251	19.435	6	22.7	4	4	0.899928	-0.152118	12.175	7	14.8	3	3	0.80642	-0.310397	7.671	3
	433	Tb927.1.3800	Tb927.1.3800		hypothetical protein, conserved	19.907	21	0	3.9625	1	1		1	-1.91661	0.0823338	1.08442		16.6	2	2	0.222846	-2.16588	NaN	1	4.4	1	1	0.314832	-1.66735	NaN	1	0	0	0	NaN		NaN	0
	1866	Tb927.11.6970	Tb927.11.6970		NADH-cytochrome b5 reductase-like protein	44.136	12.9	0	8.4325	1	1			-0.257804	0.0826677	1.08266		10.1	4	4	0.91191	-0.133037	31.365	3	4.1	2	2	0.755515	-0.404467	10.738	2	10.8	4	4	0.84915	-0.235909	9.63	4
	218	Tb927.5.295b;Tb11.v5.0214	Tb927.5.295b;Tb11.v5.0214		retrotransposon hotspot (RHS) protein 1;retrotransposon hot spot (RHS) protein, putative	95.127	51.6	0	167.43	2	1		1	-0.188003	0.0833159	1.07927		44.9	31	20	0.810176	-0.303693	33.704	34	49.9	32	21	0.9176	-0.124063	13.7	37	29.3	21	15	0.90988	-0.136252	20.009	28
	3782	Tb927.9.11910	Tb927.9.11910		hypothetical protein, conserved	51.808	19	0	19.307	1	1		1	-0.438889	0.0833209	1.07925		19	6	6	0.753807	-0.407733	15.96	8	8.8	3	3	0.857559	-0.221692	86.567	4	6.8	2	2	0.62104	-0.687242	3.2473	2
	1248	Tb927.11.11050	Tb927.11.11050		hypothetical protein, conserved	37.475	16.2	0	16.468	1	1			-0.343208	0.0839649	1.0759		16.2	4	4	0.683807	-0.548338	13.142	7	16.2	4	4	0.818599	-0.288772	6.2898	9	3	1	1	0.87508	-0.192513	NaN	1
	3392	Tb927.8.1770	Tb927.8.1770		hypothetical protein, conserved	59.483	14.8	0	23.701	1	1		1	-0.35868	0.0841091	1.07516		14.8	5	5	0.691037	-0.533165	9.8594	5	14.8	5	5	0.899928	-0.152118	21.12	6	4.8	1	1	0.76273	-0.390756	NaN	1
	3972	Tb927.9.4810	Tb927.9.4810		hypothetical protein, conserved	33.572	17.1	0.00056101	3.1287	1	1		1	-0.42941	0.0858266	1.06638		8.7	2	2	0.65937	-0.600841	0.10743	2	4.4	1	1	0.892618	-0.163885	NaN	1	17.1	3	3	0.69568	-0.523504	25.847	3
	3181	Tb927.7.3800	Tb927.7.3800		hypothetical protein, conserved	27.332	16.3	0	11.043	1	1			-0.560824	0.0860619	1.06519		16.3	3	3	0.849979	-0.234501	15.957	5	11.8	2	2	0.559128	-0.83875	8.7474	3	6.5	1	1	0.65555	-0.609222	NaN	1
	1068	Tb927.10.7910	Tb927.10.7910		hypothetical protein, conserved	21.451	6.3	0	3.9019	1	1		1	-0.737706	0.0865799	1.06258		6.3	1	1	0.622859	-0.683023	6.8507	2	6.3	1	1	0.776337	-0.365245	5.6209	2	6.3	1	1	0.44601	-1.16485	NaN	1
	3420	Tb927.8.2240	Tb927.8.2240		Tryptophanyl-tRNA synthetase 2	52.902	17.3	0	21.746	1	1		1	-0.61584	0.089026	1.05048		9.1	3	3	0.682873	-0.55031	2.3518	2	17.3	6	6	0.805607	-0.311852	31.245	5	3	1	1	0.5051	-0.985359	NaN	1
	3202	Tb927.7.4140	Tb927.7.4140		hypothetical protein, conserved	20.852	25.5	0	6.4785	1	1			-0.662429	0.0891723	1.04977		17.6	3	3	0.592207	-0.755828	10.337	3	0	0	0	NaN		NaN	0	13.3	3	3	0.67407	-0.56903	39.968	4
	3054	Tb927.7.1370	Tb927.7.1370	PPB1	spliced leader RNA PSE-promoter transcription factor, putative (PPB1)	68.826	5.3	0	6.4148	1	1			-0.960182	0.0892399	1.04944		2.5	1	1	0.335447	-1.57584	NaN	1	5.3	2	2	0.637267	-0.650029	61.861	2	2.5	1	1	0.63522	-0.654672	1.9138	2
	2427	Tb927.4.1670	Tb927.4.1670		hypothetical protein, conserved	17.389	49	0	31.955	1	1			-0.238461	0.0896916	1.04725		24.2	2	2	0.812084	-0.3003	13.538	5	43.1	3	3	0.796052	-0.329066	6.6661	5	30.1	3	3	0.94212	-0.0860173	15.284	5
	3966	Tb927.9.4360	Tb927.9.4360	KREL1	KREL1 (KREL1)	52.226	30.5	0	44.664	1	1		1	-0.373101	0.0897276	1.04707		26.4	8	8	0.706564	-0.501108	27.037	11	27.1	8	8	0.911743	-0.1333	19.34	11	16.6	5	5	0.71455	-0.484893	13.392	8
	1300	Tb927.11.12040	Tb927.11.12040		hypothetical protein, conserved	12.331	58.9	0	47.54	1	1			-0.693277	0.0897869	1.04679		58.9	5	5	0.717772	-0.478402	1.8199	8	48.6	3	3	0.453988	-1.13927	24.711	7	16.8	1	1	0.7259	-0.462157	4.3699	2
	2623	Tb927.5.1130	Tb927.5.1130		hypothetical protein, conserved	34.299	15.4	0	10.047	1	1			-0.325635	0.0904149	1.04376		15.4	5	5	0.889601	-0.16877	13.871	6	15.4	5	5	0.694734	-0.525468	68.567	4	10.6	3	3	0.82207	-0.282667	24.81	3
	470	Tb927.1.840	Tb927.1.840		hypothetical protein, conserved	27.104	18.4	0	8.0267	1	1		1	-0.629984	0.0904501	1.04359		10	2	2	0.771069	-0.375067	29.743	3	15.1	2	2	0.488926	-1.03231	49.103	2	10	2	2	0.7157	-0.482573	27.552	3
	2308	Tb927.3.4390	Tb927.3.4390	GCVL-1	dihydrolipoamide dehydrogenase, putative (GCVL-1)	55.839	44.6	0	73.903	1	1		1	-0.23881	0.0904743	1.04347		38.2	14	14	0.788208	-0.343351	17.136	24	42.2	15	15	0.820816	-0.284869	11.643	25	27.5	10	10	0.94069	-0.0882087	9.7329	13
	2783	Tb927.5.680	Tb927.5.680		hypothetical protein, conserved	65.263	11.1	0	10.02	1	1			-0.447375	0.0907194	1.0423		5.8	1	1	0.661813	-0.595504	NaN	1	8.4	2	2	0.664894	-0.588805	16.025	2	8.5	2	2	0.89638	-0.157818	71.533	2
	986	Tb927.10.6200	Tb927.10.6200		hypothetical protein, conserved	12.255	19.2	0	29.662	1	1		1	-0.779601	0.091271	1.03967		19.2	1	1	0.707864	-0.498455	20.828	2	19.2	1	1	0.410391	-1.28493	8.0631	2	19.2	1	1	0.68046	-0.555418	3.8154	2
	797	Tb927.10.2070	Tb927.10.2070		hypothetical protein, conserved	22.271	9	0.0016034	2.5885	1	1		1	-1.32234	0.09142	1.03896		4.5	1	1	0.35025	-1.51354	28.759	2	9	2	2	0.456558	-1.13113	20.054	2	0	0	0	NaN		NaN	0
	492	Tb927.10.10390	Tb927.10.10390		trypanothione reductase	53.156	53.7	0	82.782	1	1			0.254528	0.0914711	1.03872		40.7	10	10	1.30063	0.379207	25.771	13	53.7	15	15	1.21968	0.286498	14.572	20	13.6	3	3	1.0702	0.0978804	20.294	3
	3499	Tb927.8.4150	Tb927.8.4150	TimRhom II	hypothetical protein, conserved	33.246	13	0	135.09	1	1		1	-0.339179	0.0921196	1.03565		13	3	3	0.711491	-0.491083	3.8771	9	13	3	3	0.756372	-0.402831	11.637	9	13	3	3	0.91788	-0.123623	17.991	8
	164	Tb927.11.7214;Tb11.02.5100b	Tb927.11.7214;Tb11.02.5100b		hypothetical protein, conserved;hypothetical protein, conserved	63.574	6.1	0	6.5873	2	1		1	-0.620357	0.092509	1.03382		6.1	3	3	0.610836	-0.711142	2.444	4	3.6	2	2	0.692761	-0.529571	1.839	4	0	0	0	NaN		NaN	0
	2930	Tb927.6.3610	Tb927.6.3610		hypothetical protein, conserved	38.967	21.2	0	19.404	1	1		1	-0.315058	0.0934751	1.0293		21.2	4	4	0.814465	-0.296076	15.849	5	18	3	3	0.903996	-0.145612	25.11	4	6.4	2	2	0.7054	-0.503487	6.1772	2
	1645	Tb927.11.2930	Tb927.11.2930		hypothetical protein, conserved	13.477	52.9	0	26.873	1	1		1	-0.781923	0.0940821	1.02649		52.9	4	4	0.609719	-0.713784	20.513	5	51.2	4	4	0.417624	-1.25972	25.126	4	18.2	3	3	0.77257	-0.372262	35.338	3
	4087	Tb927.9.9080	Tb927.9.9080		hypothetical protein, conserved	28.704	35.2	0	25.876	1	1		1	-0.184819	0.094524	1.02446		32	6	6	0.812084	-0.3003	14.056	8	17	4	4	0.938438	-0.091666	3.8849	5	23.7	4	4	0.89348	-0.162493	27.225	4
	3611	Tb927.8.6110	Tb927.8.6110	HMGS	hypothetical protein, conserved	54.669	67.1	0	323.31	1	1		1	-0.30302	0.0955131	1.01994		67.1	31	31	0.761151	-0.393746	11.464	105	67.1	32	32	0.750525	-0.414027	10.342	104	57.3	27	27	0.9322	-0.101289	12.065	74
	1406	Tb927.11.14120	Tb927.11.14120		phenylalanyl-tRNA synthetase alpha chain, putative	57.056	27.6	0	55.771	1	1			0.243236	0.0955267	1.01988		26	10	10	1.2767	0.352418	19.23	19	23.6	10	10	1.2248	0.292546	15.771	16	14.5	6	6	1.0605	0.0847447	13.287	11
	389	Tb927.1.1690	Tb927.1.1690	KREN1	RNA editing endoribonuclease (KREN1)	89.886	4.3	0	9.4705	1	1		1	-0.41488	0.0958974	1.01819		2.9	2	2	0.909008	-0.137635	51.566	2	1.6	1	1	0.678887	-0.558758	NaN	1	2.9	2	2	0.68385	-0.548248	15.355	3
	3239	Tb927.7.5260	Tb927.7.5260		hypothetical protein, conserved	22.68	11.9	0	5.8259	1	1			-0.418286	0.0973305	1.01175		5.2	1	1	0.650703	-0.619929	21.662	2	5.2	1	1	0.712911	-0.488206	NaN	1	11.9	2	2	0.9033	-0.146723	22.599	2
	2688	Tb927.5.2590	Tb927.5.2590		hypothetical protein, conserved	29.106	6.8	0.0040848	1.9917	1	1			0.217411	0.0974063	1.01141		6.8	1	1	1.13594	0.183884	NaN	1	6.8	1	1	1.18998	0.250938	NaN	1	0	0	0	NaN		NaN	0
	3212	Tb927.7.4320	Tb927.7.4320		hypothetical protein, conserved	31.197	17	0	22.279	1	1			-0.385738	0.0976862	1.01017		17	3	3	0.824131	-0.279055	29.048	6	17	3	3	0.850774	-0.233152	12.034	3	10.5	2	2	0.63949	-0.645006	16.018	3
	3833	Tb927.9.13540	Tb927.9.13540		hypothetical protein, conserved	41.261	4.2	0.00029078	3.6899	1	1		1	-0.189864	0.0982022	1.00788		4.2	1	1	0.801989	-0.318346	0.77547	2	4.2	1	1	0.912742	-0.131721	2.5468	2	4.2	1	1	0.92049	-0.119526	12.131	2
	3032	Tb927.6.950	Tb927.6.950		cysteinyl-tRNA synthetase, putative	89.376	53.4	0	244.96	1	1			0.311877	0.100624	0.997299		48	28	28	1.40038	0.485822	25.364	51	50.4	29	29	1.26002	0.333443	28.198	49	41.1	21	21	1.084	0.116365	14.946	39
	1399	Tb927.11.1400	Tb927.11.1400		hypothetical protein, conserved	94.046	6.6	0	8.6751	1	1		1	-0.297678	0.101121	0.995158		1.4	1	1	0.800128	-0.321697	NaN	1	6.6	5	5	0.927128	-0.10916	98.507	5	1.4	1	1	0.72589	-0.462177	NaN	1
	1951	Tb927.11.900	Tb927.11.900	IDH	isocitrate dehydrogenase, putative (IDH)	46.77	62.5	0	320.27	1	1			0.305185	0.10164	0.992935		59.6	24	22	1.26151	0.335153	10.941	60	57.9	23	22	1.38617	0.471109	13.964	57	57.4	23	21	1.0787	0.109294	14.603	49
	415	Tb927.1.2990	Tb927.1.2990		hypothetical protein, conserved	115.95	6.3	0	11.052	1	1		1	-1.23528	0.1018	0.992251		2.4	2	2	0.369973	-1.43451	14.539	2	5.4	4	4	0.487662	-1.03605	19.178	4	0	0	0	NaN		NaN	0
	2841	Tb927.6.1860	Tb927.6.1860		hypothetical protein, conserved	30.977	29.6	0	40.795	1	1		1	-0.404088	0.102786	0.988067		21.2	4	4	0.701164	-0.512176	9.4147	7	17.5	3	3	0.671321	-0.574925	8.0405	4	29.6	5	5	0.9169	-0.125164	15.319	6
	2208	Tb927.3.2260	Tb927.3.2260		hypothetical protein, conserved	26.421	9.6	0.0016081	2.618	1	1		1	-1.13843	0.102828	0.987891		3.5	1	1	0.292432	-1.77383	NaN	1	3.5	1	1	0.426003	-1.23106	NaN	1	6.1	1	1	0.75241	-0.410409	NaN	1
	3907	Tb927.9.2270	Tb927.9.2270		hypothetical protein, conserved	78.354	12.9	0	21.798	1	1		1	-1.01893	0.102873	0.987698		5.3	2	2	0.61267	-0.706818	21.246	2	10.4	4	4	0.302106	-1.72687	101.98	4	7.8	3	3	0.64927	-0.62311	23.354	3
	1040	Tb927.10.7430	Tb927.10.7430		GTP-binding protein, putative	51.559	7.6	0.0098546	1.5258	1	1		1	-0.500695	0.103768	0.983937		7.6	2	2	0.748279	-0.418352	75.162	3	7.6	2	2	0.667557	-0.583038	11.152	5	0	0	0	NaN		NaN	0
	3147	Tb927.7.3200	Tb927.7.3200		hypothetical protein, conserved	40.195	29.7	0	18.945	1	1		1	-0.225907	0.104703	0.980039		21.2	4	4	0.813935	-0.297015	5.2884	5	17.8	4	4	0.804699	-0.313478	37.675	5	16.4	3	3	0.95447	-0.0672282	4.8295	3
	441	Tb927.1.4100	Tb927.1.4100	COXIV	cytochrome oxidase subunit IV (COXIV)	40.534	54.1	0	263.53	1	1		1	-0.557623	0.104773	0.979751		54.1	17	17	0.788955	-0.341986	6.8326	42	54.1	17	17	0.517813	-0.949497	47.341	42	52.1	16	16	0.7677	-0.381385	17.686	45
	1521	Tb927.11.16220	Tb927.11.16220		hypothetical protein, conserved	22.002	40.6	0	15.437	1	1			-0.655712	0.1052	0.977983		20.9	4	4	0.484168	-1.04642	2.6503	4	35.3	6	6	0.626331	-0.675003	11.792	7	32.1	6	6	0.8434	-0.245711	46.198	7
	1182	Tb927.11.10040	Tb927.11.10040		hypothetical protein, conserved	13.539	28.7	0	15.197	1	1		1	-0.26808	0.107206	0.969781		28.7	2	2	0.727379	-0.459222	17.928	2	28.7	2	2	0.883314	-0.179001	2.7996	3	22.1	1	1	0.8913	-0.166017	12.568	2
	1980	Tb927.11.9570	Tb927.11.9570		hypothetical protein, conserved	32.962	39.9	0	97.881	1	1			-0.436051	0.10762	0.968105		34.6	7	7	0.702741	-0.508936	8.7771	10	29.9	5	5	0.631912	-0.662205	2.0508	8	22.8	4	4	0.9094	-0.137013	27.07	9
	1801	Tb927.11.590	Tb927.11.590		hypothetical protein, conserved	22.651	27.5	0	10.705	1	1		1	-0.875658	0.108553	0.964358		22.5	3	3	0.472121	-1.08277	41.339	3	22.5	3	3	0.409836	-1.28688	40.057	4	17.5	3	3	0.83664	-0.257321	53.536	3
	3104	Tb927.7.2410	Tb927.7.2410		hypothetical protein, conserved	66.378	27.8	0	67.821	1	1			-0.190914	0.108634	0.964035		25.8	12	12	0.798212	-0.325156	15.894	21	25.2	12	12	0.902039	-0.148739	26.357	23	14.3	7	7	0.93378	-0.0988454	27.942	10
	1807	Tb927.11.6000	Tb927.11.6000		hypothetical protein, conserved	40.82	31.6	0	24.244	1	1			-0.401753	0.109979	0.95869		20.5	5	5	0.917347	-0.124461	19.8	6	19.9	5	5	0.725058	-0.463832	71.079	7	17.1	4	4	0.65204	-0.616968	83.053	3
	1586	Tb927.11.2010	Tb927.11.2010		hypothetical protein, conserved	50.298	11.5	0	9.7713	1	1			-0.400127	0.111907	0.951141		7.1	2	2	0.618774	-0.692516	9.397	3	11.5	3	3	0.830082	-0.268674	16.234	3	2.5	1	1	0.84722	-0.239191	NaN	1
	358	Tb927.4.3020;Tb11.v5.0965;Tb11.v5.0844	Tb927.4.3020;Tb11.v5.0965		ATP-dependent DEAH-box RNA helicase, putative;ATP-dependent DEAH-box RNA helicase, putative	159.21	4.2	0	11.004	3	1		1	-0.365913	0.113044	0.946754		1.5	2	2	0.887942	-0.171463	18.326	3	3.5	4	4	0.811359	-0.301588	135.35	4	1.5	2	2	0.64856	-0.624688	25.542	3
	4021	Tb927.9.6710	Tb927.9.6710		flavoprotein monooxygenase, putative	66.234	8.9	0	8.5057	1	1		1	-0.41563	0.113585	0.944679		3	2	2	0.723694	-0.466549	20.924	2	4.7	3	3	0.91508	-0.128029	1.7829	2	5.4	3	3	0.63626	-0.652312	9.6096	3
	1113	Tb927.10.8730	Tb927.10.8730		hypothetical protein, conserved	50.876	39.4	0	85.149	1	1		1	-0.400442	0.113876	0.943567		39.4	14	14	0.617703	-0.695014	15.65	24	35.1	12	12	0.823655	-0.279887	14.772	23	15.8	5	5	0.85475	-0.226426	22.152	15
	530	Tb927.10.11340;Tb11.v5.0604	Tb927.10.11340;Tb11.v5.0604		hypothetical protein, conserved;hypothetical protein, conserved	155.73	6.4	0	20.65	2	1		1	-0.559485	0.114199	0.942337		3.5	4	4	0.609868	-0.713432	26.419	5	4.5	5	5	0.568085	-0.815821	45.205	4	4.8	6	6	0.90175	-0.149201	53.03	8
	1267	Tb927.11.11460	Tb927.11.11460	ATOM69	hypothetical protein, conserved	68.998	76.6	0	323.31	1	1			-0.131282	0.115019	0.939229		76.6	41	41	0.873362	-0.195348	25.804	110	76.6	41	41	0.893096	-0.163112	21.275	106	56.8	31	31	0.97577	-0.035387	12.764	86
	3736	Tb927.9.10520	Tb927.9.10520		hypothetical protein, conserved	29.587	26.1	0	16.664	1	1		1	-1.02832	0.115604	0.937028		21.3	5	5	0.616637	-0.697507	11.348	5	17	4	4	0.288475	-1.79348	13.931	6	13.4	3	3	0.66251	-0.593986	20.316	4
	3113	Tb927.7.2620	Tb927.7.2620		hypothetical protein, conserved	34.549	6.5	0.0035907	2.0609	1	1		1	-0.885979	0.115942	0.935759		6.5	2	2	0.483255	-1.04914	2.3728	2	6.5	2	2	0.605914	-0.722816	13.604	2	0	0	0	NaN		NaN	0
	1278	Tb927.11.11620	Tb927.11.11620		hypothetical protein, conserved	27.683	7.6	0.0015839	2.4633	1	1			-0.132922	0.116551	0.933486		3.4	1	1	0.97723	-0.0332292	2.2866	3	3.4	1	1	0.880902	-0.182946	7.8689	3	7.6	2	2	0.88112	-0.18259	36.58	3
	2742	Tb927.5.3640	Tb927.5.3640		hypothetical protein, conserved	30.64	20.7	0	4.2575	1	1		1	-0.332392	0.116792	0.932586		13.3	3	3	0.697156	-0.520447	11.771	2	20.7	4	4	0.768167	-0.380508	6.3604	3	10.4	2	2	0.93548	-0.0962213	NaN	1
	3596	Tb927.8.5860	Tb927.8.5860		50S ribosomal protein L17, putative	35.06	22.9	0	17.833	1	1		1	-1.17423	0.118862	0.924958		4.7	1	1	0.379968	-1.39605	8.5952	3	22.9	4	4	0.516769	-0.952408	63.729	7	0	0	0	NaN		NaN	0
	2973	Tb927.6.4480	Tb927.6.4480	ValRS	valyl-tRNA synthetase, putative (ValRS)	110.92	51.7	0	246.96	1	1			0.274782	0.118954	0.924621		49.9	37	37	1.36754	0.451583	23.302	65	42.6	30	30	1.21615	0.282316	13.645	50	32.3	23	23	1.0647	0.090447	15.686	41
	1525	Tb927.11.1630	Tb927.11.1630		hypothetical protein, conserved	93.434	4.6	0	9.9062	1	1		1	-0.718226	0.119165	0.923852		3.2	2	2	0.432339	-1.20977	16.826	3	3.2	2	2	0.624961	-0.678162	8.8178	4	2.8	2	2	0.83119	-0.26675	10.308	5
	398	Tb927.1.1930	Tb927.1.1930		phosphatidylinositol 3-kinase, putative	324.21	7.9	0	51.66	1	1		1	0.578828	0.119204	0.92371		7.7	15	15	2.00361	1.0026	47.646	18	5.8	11	11	1.38477	0.46965	41.473	12	3	7	7	1.201	0.264236	26.55	7
	858	Tb927.10.3120	Tb927.10.3120		cytochrome c oxidase assembly protein, putative	26.948	11.2	0	8.6111	1	1			-0.784414	0.120218	0.920029		11.2	2	2	0.644164	-0.6345	42.175	2	11.2	2	2	0.523286	-0.934328	45.022	3	0	0	0	NaN		NaN	0
	3535	Tb927.8.4860	Tb927.8.4860		hypothetical protein, conserved	76.539	2.9	0.004579	1.9382	1	1		1	-1.11253	0.121048	0.917041		2.9	2	2	0.398692	-1.32665	22.276	2	1.3	1	1	0.536481	-0.898402	NaN	1	0	0	0	NaN		NaN	0
	1839	Tb927.11.6470	Tb927.11.6470		hypothetical protein, conserved	15.746	42.8	0	24.863	1	1			-0.241772	0.121669	0.914822		42.8	4	4	0.83647	-0.257614	17.18	7	42.8	4	4	0.95048	-0.0732718	11.998	6	29.7	3	3	0.76079	-0.39443	7.6858	4
	2699	Tb927.5.2810	Tb927.5.2810		hypothetical protein, conserved	20.322	15.3	0.00055448	2.9992	1	1		1	-0.515823	0.121982	0.913703		7.9	1	1	0.652529	-0.615887	NaN	1	15.3	2	2	0.749625	-0.415759	36.054	2	7.3	1	1	NaN		NaN	0
	3434	Tb927.8.2540	Tb927.8.2540		3-ketoacyl-CoA thiolase, putative	46.244	68.7	0	323.31	1	1		1	-0.355306	0.122605	0.911493		65.1	23	23	0.718701	-0.476537	11.598	82	66.7	24	24	0.703087	-0.508226	9.5782	80	43.4	17	17	0.9453	-0.0811559	15.93	54
	1817	Tb927.11.6150	Tb927.11.6150		hypothetical protein, conserved	48.159	4.1	0	13.262	1	1		1	-0.280536	0.123506	0.908312		4.1	1	1	0.784621	-0.349931	NaN	1	4.1	1	1	0.954654	-0.0669503	NaN	1	4.1	1	1	0.74498	-0.424726	NaN	1
	3331	Tb927.7.7330	Tb927.7.7330		hypothetical protein, conserved	47.401	25.2	0	21.101	1	1			-0.539198	0.123899	0.906932		18.7	6	6	0.76063	-0.394734	28.802	6	19.4	6	6	0.829187	-0.27023	24.377	7	10.2	3	3	0.51669	-0.952629	8.793	2
	3336	Tb927.7.7440	Tb927.7.7440		hypothetical protein, conserved	14.51	36.6	0	20.711	1	1			-0.203512	0.124111	0.906188		29.3	2	2	0.938527	-0.0915306	9.867	2	36.6	3	3	0.780945	-0.356707	119.33	7	36.6	3	3	0.8936	-0.162299	4.8572	3
	2492	Tb927.4.2910	Tb927.4.2910		hypothetical protein, conserved	64.512	3.1	0.003341	2.0851	1	1			-0.876127	0.124645	0.904324		3.1	2	2	0.355783	-1.49093	21.456	2	1.7	1	1	0.562905	-0.829038	27.909	2	3.1	2	2	0.80753	-0.308412	129.78	2
	3316	Tb927.7.7010	Tb927.7.7010		hypothetical protein, conserved	18.121	28.6	0	14.784	1	1		1	-0.646302	0.124825	0.903697		28.6	4	4	0.5113	-0.967759	20.181	6	28.6	4	4	0.565195	-0.823179	4.3169	5	13	2	2	0.90252	-0.147969	87.141	2
	3780	Tb927.9.11880	Tb927.9.11880		hypothetical protein, conserved	51.045	25.2	0	32.49	1	1		1	-0.477474	0.12489	0.903474		18	4	4	0.62905	-0.668754	10.688	6	19.8	5	5	0.633072	-0.659559	5.551	8	17.3	4	4	0.93038	-0.104108	38.203	6
	2210	Tb927.3.2300	Tb927.3.2300		hypothetical protein, conserved	22.084	20.4	0	6.7649	1	1		1	-0.68382	0.125578	0.901086		13.9	2	2	0.566251	-0.820485	22.321	2	12.4	2	2	0.684369	-0.547154	NaN	1	0	0	0	NaN		NaN	0
	1166	Tb927.10.9810	Tb927.10.9810		hypothetical protein, conserved	33.886	41.2	0	56.85	1	1			-0.478972	0.125588	0.901052		34.2	7	7	0.737953	-0.438399	25.499	10	31.6	6	6	0.565323	-0.822853	15.205	9	24.9	5	5	0.88536	-0.175664	4.0745	6
	1563	Tb927.11.16870	Tb927.11.16870		NADH dehydrogenase subunit NI8M, putative	18.805	42.4	0	49.234	1	1		1	-0.997266	0.127219	0.895447		35.2	3	3	0.56057	-0.835035	5.9627	4	24.2	3	3	0.752672	-0.409907	5.4007	3	7.9	1	1	0.29795	-1.74686	NaN	1
	1422	Tb927.11.14360;Tb927.11.14350	Tb927.11.14360;Tb927.11.14350	MCP2	mitochondrial carrier protein (MCP2);mitochondrial carrier protein (MCP22)	38.053	11.5	0.00057159	3.3767	2	1	1		-0.535087	0.127668	0.893917		3.5	1	1	0.744158	-0.426318	NaN	1	11.5	2	2	0.64	-0.643856	21.346	2	0	0	0	NaN		NaN	0
	2222	Tb927.3.2630	Tb927.3.2630		hypothetical protein, conserved	85.246	3.6	0	4.2392	1	1		1	-0.790673	0.128847	0.889927		3.6	2	2	0.404089	-1.30725	7.0755	2	1.4	1	1	0.858738	-0.219711	NaN	1	1.4	1	1	0.55669	-0.845054	NaN	1
	1796	Tb927.11.5780	Tb927.11.5780	MTRNAP	mitochondrial DNA-directed RNA polymerase (MTRNAP)	143.82	6.8	0	9.2818	1	1		1	-0.922885	0.129442	0.887924		3.8	3	3	0.379003	-1.39972	76.294	3	2.9	2	2	0.872372	-0.196985	NaN	1	2.7	2	2	0.44382	-1.17195	4.4758	2
	2347	Tb927.3.5240	Tb927.3.5240		hypothetical protein, conserved	66.655	12.7	0	13.642	1	1			-1.66328	0.129781	0.886789		5.7	2	2	0.376577	-1.40898	NaN	1	10	3	3	0.633593	-0.658372	41.702	2	5.5	2	2	0.1319	-2.92248	NaN	1
	1555	Tb927.11.16750	Tb927.11.16750		hypothetical protein, conserved	25.871	42.3	0	35.65	1	1			-0.324343	0.130721	0.883653		36.3	6	6	0.767754	-0.381283	31.097	11	36.3	6	6	0.699154	-0.516318	12.096	10	23.1	4	4	0.94906	-0.0754287	10.689	11
	2232	Tb927.3.2840	Tb927.3.2840		inorganic pyrophosphatase, putative	28.675	15.7	0	15.144	1	1		1	-0.322217	0.130974	0.882816		15.7	2	2	0.696379	-0.522056	29.836	2	15.7	2	2	0.946701	-0.0790197	0.67652	2	6.1	1	1	0.77616	-0.365574	NaN	1
	2561	Tb927.4.4620	Tb927.4.4620	COXVIII	cytochrome oxidase subunit VIII (COXVIII)	18.729	39.5	0	9.6518	1	1		1	-0.603904	0.131461	0.881203		26.8	4	4	0.881756	-0.181548	31.53	7	33.8	4	4	0.491183	-1.02567	18.986	6	21	3	3	0.6577	-0.604498	10.806	3
	785	Tb927.10.1950	Tb927.10.1950		leucine-rich repeat protein (LRRP), putative	77.026	7.7	0	10.317	1	1		1	-0.273596	0.132183	0.878823		5.1	2	2	0.714133	-0.485736	12.68	3	5.9	2	2	0.925155	-0.112233	5.8532	2	5.1	2	2	0.85689	-0.222818	24.557	2
	3164	Tb927.7.3460	Tb927.7.3460		hypothetical protein, conserved	50.252	8.2	0	4.1441	1	1		1	-1.01382	0.132978	0.876219		4	1	1	NaN		NaN	0	8.2	2	2	0.426694	-1.22873	41.523	2	4	1	1	0.57478	-0.798918	NaN	1
	2629	Tb927.5.1240	Tb927.5.1240		hypothetical protein, conserved	39.438	8.5	0	4.61	1	1		1	-1.38673	0.133238	0.875371		2.8	1	1	0.311808	-1.68127	NaN	1	0	0	0	NaN		NaN	0	5.7	1	1	0.46905	-1.09219	NaN	1
	2264	Tb927.3.3460	Tb927.3.3460		hypothetical protein, conserved	53.228	55.5	0	93.152	1	1			-0.505071	0.133918	0.87316		46.2	17	17	0.589762	-0.761796	16.455	29	50.5	18	18	0.634598	-0.656084	19.058	26	37.1	18	18	0.93476	-0.0973321	26.996	24
	1310	Tb927.11.12240	Tb927.11.12240		ubiquitin carboxyl-terminal hydrolase, putative,cysteine peptidase, Clan CA, family C19, putative	89.061	17.2	0	26.773	1	1			-0.188164	0.133996	0.872909		10.6	7	7	0.806452	-0.31034	13.188	7	13.7	7	7	0.865876	-0.207768	28.634	12	11.8	6	6	0.96836	-0.0463847	21.049	5
	1799	Tb927.11.5880	Tb927.11.5880		hypothetical protein, conserved	63.971	9.2	0	7.5516	1	1		1	-0.308027	0.135411	0.868346		5.7	3	3	0.710379	-0.49334	15.913	3	5.7	3	3	0.955292	-0.0659859	8.6464	4	6.5	4	4	0.7766	-0.364756	12.395	4
	248	Tb927.10.6300;Tb11.v5.0276	Tb927.10.6300;Tb11.v5.0276		hypothetical protein, conserved;hypothetical protein, conserved	50.038	19.5	0	23.281	2	1		1	-0.62423	0.136769	0.864012		14.7	4	4	0.603901	-0.727616	14.666	3	7.1	2	2	0.496352	-1.01057	37.709	3	4.8	2	2	0.91098	-0.134509	40.8	3
	1582	Tb927.11.1950	Tb927.11.1950		hypothetical protein, conserved	24.799	5	0	4.3076	1	1			-1.09282	0.136974	0.863362		5	1	1	0.55325	-0.853996	NaN	1	5	1	1	0.397314	-1.33165	NaN	1	0	0	0	NaN		NaN	0
	3859	Tb927.9.14420	Tb927.9.14420	PPIase	cyclophilin-like protein, putative (PPIase)	42.65	6	0	7.1153	1	1		1	-0.573506	0.137825	0.860673		6	3	3	0.657246	-0.605494	11.666	5	6	3	3	0.510751	-0.969307	28.903	4	3.6	2	2	0.90393	-0.145717	10.13	3
	2078	Tb927.2.4240	Tb927.2.4240		GTP binding protein, putative	40.685	32.7	0	52.551	1	1		1	-0.398757	0.138066	0.859912		29.2	9	9	0.864006	-0.210888	23.397	13	22.1	6	6	0.837451	-0.255924	26.321	8	18.8	5	5	0.60313	-0.729459	118.49	8
	2010	Tb927.11.9980	Tb927.11.9980		2-oxoglutarate dehydrogenase E1 component, putative	112.95	67.9	0	323.31	1	1		1	-0.146241	0.138722	0.857855		66.9	55	55	0.830772	-0.267476	8.9957	196	67.7	54	54	0.950209	-0.0736831	8.6862	205	57.7	49	49	0.93461	-0.0975636	8.4725	165
	295	Tb11.v5.0524;Tb927.1.790	Tb11.v5.0524;Tb927.1.790		hypothetical protein, conserved;hypothetical protein, conserved	60.47	6.6	0	4.4143	2	1		1	-0.589433	0.138791	0.85764		3.2	1	1	0.558566	-0.840201	22.357	2	3.2	1	1	0.562303	-0.83058	48.605	2	3.4	1	1	0.93464	-0.0975173	NaN	1
	3513	Tb927.8.4380	Tb927.8.4380	ATOM12	hypothetical protein, conserved	11.86	43.8	0	68.036	1	1			-0.191462	0.139359	0.855866		43.8	6	6	0.799169	-0.323428	21.605	13	43.8	5	5	0.868056	-0.204141	5.8192	10	29.5	2	2	0.96807	-0.0468168	5.7739	3
	618	Tb927.10.13200;Tb11.v5.0897	Tb927.10.13200;Tb11.v5.0897		hypothetical protein, conserved;hypothetical protein, conserved	102.15	8.1	0	5.3209	2	1		1	-1.29466	0.140696	0.851719		0	0	0	NaN		NaN	0	1.9	1	1	0.3332	-1.58554	NaN	1	6.1	2	2	0.49869	-1.00378	59.302	2
	3061	Tb927.7.1550	Tb927.7.1550	KRET2	KRET2 (KRET2)	56.531	9	0	12.353	1	1		1	-0.346673	0.14181	0.848294		7.4	3	3	0.730567	-0.452912	0.61531	6	9	4	4	0.692425	-0.530271	14.437	3	8.8	4	4	0.96137	-0.0568363	47.789	6
	968	Tb927.10.5830	Tb927.10.5830		hypothetical protein, conserved	59.941	21.1	0	38.862	1	1		1	-0.764301	0.141895	0.848033		11.2	3	3	0.425641	-1.23229	9.5186	6	17.2	5	5	0.529633	-0.916935	8.1515	6	18.7	5	5	0.90521	-0.143676	80.137	11
	645	Tb927.10.13770	Tb927.10.13770		hypothetical protein, conserved	12.945	20.4	0	6.1763	1	1		1	-0.820649	0.142226	0.847021		9.7	1	1	0.413548	-1.27387	NaN	1	20.4	2	2	0.482672	-1.05088	10.33	2	9.7	1	1	0.90929	-0.137188	NaN	1
	3432	Tb927.8.2490	Tb927.8.2490		hypothetical protein, conserved	35.229	8.1	0.00056117	3.1323	1	1		1	-0.470442	0.142478	0.846252		8.1	2	2	0.560978	-0.833983	11.88	2	3.5	1	1	0.741565	-0.431356	NaN	1	3.5	1	1	0.90376	-0.145988	NaN	1
	677	Tb927.10.14280	Tb927.10.14280	MCP20	mitochondrial carrier protein (MCP20)	21.072	32.3	0	23.648	1	1	1	1	-0.183758	0.143867	0.842039		32.3	3	3	0.792017	-0.336398	7.0322	5	32.3	3	3	0.948587	-0.0761486	33.132	5	12.7	1	1	0.90832	-0.138727	18.58	2
	2728	Tb927.5.3360	Tb927.5.3360		50S ribosomal protein L2, putative	46.727	22.9	0	22.062	1	1		1	-0.969371	0.143877	0.84201		15.3	4	4	0.437618	-1.19226	58.593	6	18.7	5	5	0.596054	-0.746485	8.8382	6	2.4	1	1	NaN		NaN	0
	2686	Tb927.5.2560	Tb927.5.2560		hypothetical protein, conserved	8.7229	71.2	0	39.866	1	1		1	-1.5423	0.144338	0.840619		71.2	4	4	0.439367	-1.1865	15.733	8	71.2	4	4	0.268298	-1.89809	0.76211	8	26	2	2	NaN		NaN	0
	1568	Tb927.11.16930	Tb927.11.16930	ABCB7	ABC transporter, putative (ABCB7)	79.103	4.7	0	9.8911	1	1		1	-0.709274	0.144403	0.840422		0	0	0	NaN		NaN	0	3.1	1	1	0.685119	-0.545573	NaN	1	1.7	1	1	0.54602	-0.872974	NaN	1
	833	Tb927.10.2680	Tb927.10.2680		hypothetical protein, conserved	64.611	4.5	0.0033505	2.1059	1	1		1	-0.526691	0.145915	0.835901		4.5	2	2	0.637471	-0.649569	5.8354	2	4.5	2	2	0.755858	-0.403813	3.8613	2	0	0	0	NaN		NaN	0
	558	Tb927.10.12050	Tb927.10.12050		hypothetical protein, conserved	33.571	25.6	0	13.905	1	1		1	-0.466936	0.146113	0.835311		12.1	2	2	0.602301	-0.731444	15.401	2	20.4	3	3	0.660939	-0.597412	25.265	3	13.1	2	2	0.95135	-0.071952	79.744	2
	517	Tb927.10.11060	Tb927.10.11060		hypothetical protein, conserved	8.8635	21.9	0.0016234	2.7338	1	1			-0.377926	0.146151	0.835199		21.9	2	2	0.614817	-0.701771	5.5722	3	9.6	1	1	0.879662	-0.184979	NaN	1	21.9	2	2	0.84263	-0.247029	11.926	2
	685	Tb927.10.14370	Tb927.10.14370		hypothetical protein, conserved	13.337	13.3	0	18.879	1	1			-0.381897	0.147993	0.829758		13.3	1	1	0.787092	-0.345396	NaN	1	13.3	1	1	0.621659	-0.685806	NaN	1	13.3	1	1	0.92371	-0.114488	NaN	1
	2577	Tb927.4.5040	Tb927.4.5040		dihydrolipoamide dehydrogenase, putative	66.008	21.2	0	36.18	1	1			-0.149361	0.148259	0.828979		11.4	5	5	0.838926	-0.253384	30.108	5	18.2	8	8	0.892061	-0.164786	15.445	7	12.6	5	5	0.97948	-0.029912	9.816	7
	1783	Tb927.11.5450	Tb927.11.5450		malic enzyme	63.119	73.2	0	323.31	1	1		1	-0.292969	0.148767	0.827492		70.4	30	30	0.749457	-0.416083	16.34	71	73.2	31	31	0.974279	-0.0375931	10.511	74	38.7	18	18	0.74472	-0.42523	10.339	43
	602	Tb927.10.12930	Tb927.10.12930		hypothetical protein, conserved	23.985	43	0	22.104	1	1			-0.508513	0.149285	0.825984		19.8	4	4	0.570972	-0.808509	47.535	4	39.6	7	7	0.640656	-0.642378	31.109	8	15	4	4	0.94957	-0.0746536	73.395	4
	257	Tb11.v5.0326	Tb11.v5.0326		retrotransposon hot spot (RHS) protein, putative	34.883	48.7	0	72.107	1	1			-0.265193	0.149742	0.824657		45	9	4	0.716897	-0.480162	8.7891	8	48.7	10	4	0.944912	-0.0817486	10.21	6	34.8	7	4	0.85047	-0.233668	25.88	7
	2698	Tb927.5.2790	Tb927.5.2790	Pol beta-PAK	mitochondrial DNA polymerase beta-PAK (Pol beta-PAK)	87.228	19.7	0	55.328	1	1		1	-0.38895	0.150376	0.82282		16.5	7	7	0.603245	-0.729183	22.866	13	16.6	7	7	0.844595	-0.243669	26.02	14	7.9	4	4	0.87418	-0.193998	48	5
	2777	Tb927.5.560	Tb927.5.560		hypothetical protein, conserved	57.756	2.2	0.0057847	1.7769	1	1		1	-0.449598	0.151239	0.820335		2.2	1	1	0.679025	-0.558464	18.286	2	2.2	1	1	0.78964	-0.340733	NaN	1	0	0	0	NaN		NaN	0
	4025	Tb927.9.6910	Tb927.9.6910		hypothetical protein, conserved	17.806	29.6	0	10.504	1	1		1	-0.708234	0.153095	0.815039		24.7	3	3	0.484872	-1.04432	13.333	5	24.7	3	3	0.499825	-1.0005	2.0437	6	22.8	3	3	0.94614	-0.0798744	36.458	3
	3372	Tb927.8.1370	Tb927.8.1370		hypothetical protein, conserved	19.847	10.1	0.0013598	2.787	1	1			-0.628166	0.153366	0.81427		10.1	1	1	0.581362	-0.782492	NaN	1	10.1	1	1	0.720046	-0.473839	NaN	1	0	0	0	NaN		NaN	0
	1050	Tb927.10.760	Tb927.10.760		hypothetical protein, conserved	29.887	44.5	0	32.761	1	1			-0.386405	0.154099	0.8122		33.2	6	6	0.83654	-0.257493	15.414	7	33.2	6	6	0.886289	-0.174151	15.814	11	27	4	4	0.60392	-0.727571	79.595	4
	311	Tb927.7.5620;Tb11.v5.0590	Tb927.7.5620;Tb11.v5.0590		hypothetical protein, conserved;hypothetical protein, conserved	48.224	4	0.00028893	3.5671	2	1		1	-0.698472	0.154143	0.812076		4	1	1	0.694493	-0.525969	NaN	1	4	1	1	0.546777	-0.870976	18.159	2	0	0	0	NaN		NaN	0
	1174	Tb927.10.9900	Tb927.10.9900		ABC1 protein, putative	62.856	12.4	0	12.254	1	1			-0.0951017	0.15651	0.805459		7.6	4	4	0.883158	-0.179256	32.692	5	9	5	5	0.954745	-0.0668125	10.797	5	6.7	3	3	0.97317	-0.0392364	14.724	4
	871	Tb927.10.340	Tb927.10.340		mitochondrial structure specific endonuclease I (SSE-1), putative	33.567	4.4	0	3.873	1	1		1	-0.368725	0.156895	0.80439		4.4	1	1	0.954381	-0.0673633	NaN	1	4.4	1	1	0.641149	-0.641269	11.63	2	4.4	1	1	0.75915	-0.397543	NaN	1
	1036	Tb927.10.7380	Tb927.10.7380		hypothetical protein, conserved	39.706	14.3	0	15.228	1	1		1	-0.597192	0.156907	0.804358		11.2	3	3	0.508569	-0.975484	21.189	4	11.2	3	3	0.598659	-0.740194	15.405	4	9.7	3	3	0.94875	-0.0759	66.801	4
	1899	Tb927.11.7790	Tb927.11.7790		hypothetical protein, conserved	22.038	5.9	0.0057964	1.7876	1	1		1	-1.0537	0.157669	0.802253		5.9	1	1	0.400497	-1.32014	NaN	1	5.9	1	1	0.579441	-0.787265	NaN	1	0	0	0	NaN		NaN	0
	3062	Tb927.7.1570	Tb927.7.1570		hypothetical protein, conserved	155.69	2.3	0.0098839	1.5662	1	1			0.530096	0.158168	0.800882		2.3	2	2	1.62925	0.704206	23.377	3	2.3	2	2	1.77895	0.831024	29.413	3	1.1	1	1	1.0389	0.0550568	8.9243	5
	3056	Tb927.7.1400	Tb927.7.1400		hypothetical protein, conserved	60.696	6.3	0	5.0708	1	1			-0.822237	0.159552	0.797097		6.3	2	2	0.488782	-1.03274	NaN	1	2.2	1	1	0.654407	-0.611739	NaN	1	0	0	0	NaN		NaN	0
	802	Tb927.10.2200	Tb927.10.2200		hypothetical protein, conserved	37.967	18.3	0	16.989	1	1			-0.328059	0.161467	0.791917		12.7	2	2	0.746993	-0.420833	17.984	6	18.3	3	3	0.692521	-0.530071	1.2723	6	12.7	2	2	0.9772	-0.0332743	19.813	4
	1390	Tb927.11.13830	Tb927.11.13830		hypothetical protein, conserved	36.135	7.7	0.0072355	1.691	1	1		1	-0.386703	0.162466	0.789239		7.7	2	2	0.713216	-0.487589	21.751	2	4.8	1	1	0.820277	-0.285816	NaN	1	0	0	0	NaN		NaN	0
	1096	Tb927.10.8320	Tb927.10.8320	COXIX	cytochrome oxidase subunit IX (COXIX)	13.786	39.5	0	13.804	1	1		1	-0.5581	0.162554	0.789002		39.5	2	2	0.880747	-0.183201	2.2555	7	39.5	2	2	0.482486	-1.05144	20.668	6	39.5	2	2	0.73731	-0.439657	0.21871	7
	1607	Tb927.11.2360	Tb927.11.2360		phenylalanyl-tRNA synthetase (beta subunit), putative	70.311	63.8	0	148.56	1	1			0.120593	0.162872	0.788153		56.2	26	26	1.13776	0.186196	15.805	41	47.6	22	22	1.12179	0.165807	17.11	36	39.9	18	18	1.0068	0.0097772	12.68	27
	1523	Tb927.11.16250	Tb927.11.16250		hypothetical protein, conserved	67.981	6.8	0.0005729	3.4194	1	1			-0.387786	0.163054	0.787669		6.8	2	2	0.712352	-0.489337	22.217	2	0	0	0	NaN		NaN	0	5.4	1	1	0.82004	-0.286234	NaN	1
	1519	Tb927.11.1620	Tb927.11.1620		hypothetical protein, conserved	21.598	62	0	125.14	1	1			-0.175038	0.163469	0.786566		52.1	7	7	0.803213	-0.316146	10.316	15	49	7	7	0.886603	-0.173639	15.003	14	38	6	6	0.97581	-0.0353278	21.238	8
	3781	Tb927.9.11900	Tb927.9.11900		acyl transferase-like protein	60.778	6.5	0	7.182	1	1		1	-0.212635	0.163514	0.786446		6.5	3	3	0.752842	-0.409581	22.999	4	3.6	2	2	0.921404	-0.118094	7.1161	3	1.8	1	1	0.92644	-0.11023	3.9761	2
	1313	Tb927.11.12370	Tb927.11.12370		hypothetical protein, conserved	27.689	9.5	0.0098717	1.5603	1	1		1	-0.822925	0.164379	0.784153		6.2	1	1	0.657203	-0.605589	NaN	1	3.3	1	1	0.486239	-1.04026	NaN	1	0	0	0	NaN		NaN	0
	183	Tb11.1420;Tb11.1370;Tb927.11.1850	Tb11.1420;Tb11.1370;Tb927.11.1850		hypothetical protein,chrXI additional, unordered contigs;hypothetical protein, conserved;hypothetical protein, conserved	50.917	9.8	0	16.658	3	1		1	-0.791079	0.164925	0.782713		3.2	1	1	0.393902	-1.34409	NaN	1	9.8	3	3	0.522493	-0.936515	16.482	3	6.4	2	2	0.93781	-0.0926325	111.85	2
	3322	Tb927.7.7090	Tb927.7.7090		hypothetical protein, conserved	17.127	16.4	0	13.11	1	1		1	-0.61535	0.165375	0.781529		16.4	2	2	0.713318	-0.487383	4.0246	7	16.4	2	2	0.446209	-1.16421	5.296	6	16.4	2	2	0.8739	-0.19446	30.959	5
	1595	Tb927.11.2190	Tb927.11.2190		hypothetical protein, conserved	11.175	47.5	0	11.759	1	1			-0.420438	0.16733	0.776426		47.5	3	3	0.808146	-0.307312	15.422	3	29.3	2	2	0.690846	-0.533563	29.449	3	0	0	0	NaN		NaN	0
	338	Tb11.v5.0736;Tb927.5.3420	Tb11.v5.0736;Tb927.5.3420		hypothetical protein, conserved;hypothetical protein, conserved	54.843	5.8	0.00055142	2.9517	2	1		1	-0.199268	0.169231	0.771521		2.3	1	1	0.81057	-0.302992	NaN	1	5.8	2	2	0.821288	-0.28404	23.965	3	5.8	2	2	0.99256	-0.0107737	37.77	2
	795	Tb927.10.2050	Tb927.10.2050		hypothetical protein, conserved	44.299	4.4	0	4.4079	1	1		1	-0.282619	0.169461	0.770929		4.4	1	1	0.723327	-0.46728	NaN	1	4.4	1	1	0.984834	-0.0220482	NaN	1	4.4	1	1	0.77996	-0.358528	NaN	1
	660	Tb927.10.14000	Tb927.10.14000	ACO	aconitase (ACO)	98.314	70.7	0	323.31	1	1			-0.247425	0.171022	0.766948		68.2	43	43	0.89214	-0.164658	13.394	114	67.4	43	43	0.934754	-0.0973411	13.326	108	55.4	37	37	0.71684	-0.480277	9.6658	82
	1861	Tb927.11.6830	Tb927.11.6830		hypothetical protein, conserved	108.83	11.9	0	16.101	1	1			-0.376998	0.17272	0.762658		8	6	6	0.689275	-0.536849	16.186	7	8	6	6	0.669703	-0.578407	24.72	7	5.9	5	5	0.98915	-0.0157388	40.095	6
	3250	Tb927.7.5540	Tb927.7.5540		2,4-dienoyl-coa reductase-like protein	80.352	4.5	0	6.5348	1	1		1	-0.409054	0.172735	0.762618		2.1	1	1	0.594672	-0.749834	18.997	2	2.1	1	1	0.753693	-0.407951	NaN	1	4.5	2	2	0.95305	-0.0693762	84.504	2
	256	Tb11.v5.0325	Tb11.v5.0325		retrotransposon hot spot (RHS) protein, putative	36.986	46.2	0	14.051	1	1			-0.213519	0.173174	0.761517		46.2	12	4	0.779059	-0.360196	7.6753	6	41.2	11	4	0.989218	-0.0156403	10.941	8	27.4	7	3	0.83236	-0.26472	28.583	6
	1552	Tb927.11.16710	Tb927.11.16710		hypothetical protein, conserved	13.612	18.6	0	38.113	1	1		1	-0.157626	0.174686	0.757743		10.2	1	1	0.815395	-0.29443	6.1568	3	18.6	3	3	0.978857	-0.0308304	11.822	6	18.6	2	2	0.90274	-0.147617	30.176	4
	3647	Tb927.8.680	Tb927.8.680	KREPA5	KREPA5 (KREPA5)	19.083	16	0	4.3299	1	1		1	-0.514187	0.176113	0.754209		10.1	1	1	0.522548	-0.936365	NaN	1	16	2	2	0.689941	-0.535456	4.6278	2	10.1	1	1	0.95215	-0.0707392	NaN	1
	2510	Tb927.4.3430	Tb927.4.3430	TbTim12	hypothetical protein, conserved	12.369	37.6	0	63.211	1	1			-0.112305	0.176412	0.753473		37.6	4	4	0.863782	-0.211261	17.931	5	37.6	4	4	0.984543	-0.0224744	6.8913	8	37.6	4	4	0.93098	-0.103178	7.7967	4
	2175	Tb927.3.1710	Tb927.3.1710		hypothetical protein, conserved	43.986	22.5	0	39.309	1	1		1	-0.463434	0.17726	0.75139		7.4	2	2	0.982801	-0.0250288	69.449	2	8.2	2	2	0.582072	-0.78073	12.858	2	18.8	4	4	0.66686	-0.584544	17.269	5
	507	Tb927.10.10780	Tb927.10.10780		hypothetical protein, conserved	23.3	36	0	11.168	1	1		1	-0.336742	0.179067	0.746984		27.6	4	4	0.73416	-0.445833	19.192	3	22.9	3	3	0.68157	-0.553066	13.293	3	17.3	2	2	0.99218	-0.0113262	6.2817	2
	3277	Tb927.7.620	Tb927.7.620		hypothetical protein, conserved	43.012	6.1	0.0045755	1.9293	1	1			-1.01307	0.181298	0.741607		6.1	1	1	0.403421	-1.30964	NaN	1	6.1	1	1	0.608569	-0.716508	NaN	1	0	0	0	NaN		NaN	0
	3575	Tb927.8.5540	Tb927.8.5540	Isa1	hypothetical protein, conserved	29.536	13.2	0.0020937	2.319	1	1		1	-0.555059	0.182147	0.739578		4.4	1	1	0.607792	-0.718351	NaN	1	13.2	2	2	0.762195	-0.391768	7.8737	3	0	0	0	NaN		NaN	0
	1472	Tb927.11.1540	Tb927.11.1540		isovaleryl-coA dehydrogenase, putative	44.799	56.9	0	91.007	1	1		1	-0.23513	0.182895	0.737799		39.4	11	11	0.813603	-0.297602	20.245	19	49.9	13	13	0.994431	-0.00805654	14.11	23	43.6	11	11	0.758	-0.39973	33.988	13
	3218	Tb927.7.4440	Tb927.7.4440		hypothetical protein, conserved	31.573	28.8	0	21.593	1	1		1	-0.380244	0.183239	0.736982		20.2	3	3	0.968148	-0.0467006	34.401	3	26.4	3	3	0.763359	-0.389567	15.119	3	7.5	2	2	0.61367	-0.704465	61.469	2
	1233	Tb927.11.10780	Tb927.11.10780		hypothetical protein, conserved	30.902	44.4	0	50.313	1	1			-0.262735	0.183889	0.735445		44.4	8	8	0.724848	-0.46425	16.028	12	41.9	7	7	0.807494	-0.308477	11.564	11	10.8	2	2	0.98933	-0.0154763	17.579	6
	3761	Tb927.9.11220	Tb927.9.11220	TbTim42	hypothetical protein, conserved	41.551	55.3	0	72.785	1	1			-0.226042	0.183929	0.73535		44.4	13	13	0.803794	-0.315102	10.566	23	53.1	15	15	0.77821	-0.361768	57.208	25	36.2	12	12	0.99913	-0.00125559	20.979	16
	1585	Tb927.11.1990	Tb927.11.1990		arginyl-tRNA synthetase, putative	78.432	61.4	0	177.75	1	1			0.172856	0.185295	0.732136		51.6	30	30	1.25745	0.330501	16.916	60	52	31	31	1.11559	0.157801	18.409	47	38.9	23	23	1.0212	0.0302654	27.959	39
	3479	Tb927.8.3560	Tb927.8.3560	PIF5	DNA repair and recombination helicase protein PIF5 (PIF5)	102.46	9.7	0	18.62	1	1		1	-0.977881	0.185964	0.73057		5.7	3	3	0.34825	-1.5218	32.503	4	7.3	4	4	0.374	-1.41889	12.119	4	3.9	2	2	1.0049	0.00705191	136.67	2
	221	Tb927.5.440;Tb11.v5.0223	Tb927.5.440;Tb11.v5.0223		trans-sialidase, putative;hypothetical protein, conserved	84.562	69.8	0	323.31	2	1		1	-0.381338	0.18611	0.730229		69.3	44	44	0.751371	-0.412402	38.811	126	68.1	41	41	0.616371	-0.69813	51.19	125	60.3	35	35	0.97706	-0.033481	50.404	88
	1788	Tb927.11.5530	Tb927.11.5530		hypothetical protein, conserved	29.304	11.5	0.0016181	2.6692	1	1			-0.786912	0.186415	0.729519		11.5	2	2	0.418165	-1.25786	23.912	2	11.5	2	2	0.464425	-1.10648	41.842	2	3.8	1	1	1.0025	0.00360232	NaN	1
	1762	Tb927.11.5060	Tb927.11.5060		hypothetical protein, conserved	119.59	7.9	0	23.073	1	1		1	-0.752545	0.188162	0.725468		4.9	3	3	0.360062	-1.47368	NaN	1	4.2	2	2	0.653296	-0.614192	12.396	2	2.7	3	3	0.88899	-0.169761	98.374	2
	1253	Tb927.11.11120	Tb927.11.11120		hypothetical protein, conserved	22.452	34.8	0	14.145	1	1		1	-0.272563	0.189933	0.721399		29.3	4	4	0.725374	-0.463204	6.223	6	29.3	4	4	0.782595	-0.353662	11.226	3	20.2	3	3	0.99943	-0.000822569	20.061	4
	1279	Tb927.11.11630	Tb927.11.11630		hypothetical protein, conserved	28.476	16.9	0	5.5008	1	1		1	-0.518651	0.189958	0.721343		6.6	1	1	0.549934	-0.86267	NaN	1	6.6	1	1	0.616903	-0.696884	NaN	1	16.9	2	2	1.0025	0.00360232	103.38	2
	551	Tb927.10.11900	Tb927.10.11900		hypothetical protein, conserved	19.531	25.7	0	21.176	1	1			-0.249619	0.189963	0.72133		5.4	1	1	0.962927	-0.0545012	NaN	1	5.4	1	1	0.86798	-0.204266	NaN	1	20.4	3	3	0.71198	-0.490091	52.809	3
	3661	Tb927.8.7010	Tb927.8.7010		chaperone protein DNAj, putative	22.469	18.8	0	7.8306	1	1		1	0.0785457	0.190256	0.720662		12.4	2	2	1.03839	0.0543475	2.6204	2	13.9	2	2	1.07381	0.102744	0.22853	2	0	0	0	NaN		NaN	0
	3586	Tb927.8.5680	Tb927.8.5680		hypothetical protein, conserved	66.873	2.6	0.0015856	2.4686	1	1			-0.469112	0.191262	0.718372		1.5	1	1	0.588201	-0.76562	NaN	1	1.5	1	1	0.637064	-0.650489	NaN	1	1.2	1	1	1.0061	0.00877379	NaN	1
	3735	Tb927.9.10500	Tb927.9.10500		hypothetical protein, conserved	59.455	27.2	0	37.056	1	1		1	-0.163272	0.193415	0.71351		24.6	8	8	0.83689	-0.25689	16.874	6	24.6	8	8	0.847601	-0.238542	7.6157	7	12.1	5	5	1.0039	0.00561564	13.608	5
	2710	Tb927.5.3040	Tb927.5.3040		MIX protein	23.069	37.4	0	12.331	1	1		1	-0.515007	0.193467	0.713392		20.7	3	3	0.614137	-0.703366	43.412	3	14.1	2	2	0.553465	-0.853437	21.2	2	16.7	2	2	1.0082	0.0117819	48.361	2
	3739	Tb927.9.10560	Tb927.9.10560		hypothetical protein, conserved	19.035	36.3	0	323.31	1	1			-0.082505	0.193694	0.712883		36.3	4	4	0.955292	-0.0659859	12.041	19	36.3	4	4	0.892857	-0.163499	15.122	12	36.3	4	4	0.98758	-0.0180305	7.8457	9
	1127	Tb927.10.8950;Tb927.10.8970	Tb927.10.8950;Tb927.10.8970		kinetoplast DNA-associated protein, putative;kinetoplast DNA-associated protein, putative	14.183	15.1	0	11.947	2	1		1	-0.304041	0.196736	0.706116		15.1	3	3	0.804182	-0.314406	45.774	6	15.1	3	3	0.671366	-0.574828	6.3703	5	15.1	3	3	0.98426	-0.0228886	68.639	4
	1106	Tb927.10.8610	Tb927.10.8610		hypothetical protein, conserved	96.327	3.1	0.0055485	1.7974	1	1		1	-0.930223	0.196761	0.70606		3.1	1	1	0.427131	-1.22725	NaN	1	3.1	1	1	0.644745	-0.633199	NaN	1	0	0	0	NaN		NaN	0
	3343	Tb927.7.800	Tb927.7.800	MRB800	mitochondrial RNA binding complex 1 subunit (MRB800)	60.484	27.1	0	23.248	1	1		1	-0.106902	0.197485	0.704466		17.9	5	5	0.886839	-0.173255	39.351	16	16.8	5	5	1.00336	0.00484109	20.925	11	16.6	6	6	0.89982	-0.152292	15.021	6
	1075	Tb927.10.8010	Tb927.10.8010		hypothetical protein, conserved	28.355	7.8	0.0005585	3.0688	1	1			-0.621251	0.197566	0.704288		7.8	2	2	0.566251	-0.820485	28.811	2	7.8	2	2	0.74638	-0.422018	47.419	2	0	0	0	NaN		NaN	0
	3505	Tb927.8.4230	Tb927.8.4230		hypothetical protein, conserved	119.02	8.8	0	16.201	1	1		1	-0.400091	0.199976	0.699023		6.8	5	5	0.692521	-0.530071	13.078	6	6.6	4	4	0.829256	-0.27011	13.216	4	0	0	0	NaN		NaN	0
	3374	Tb927.8.1440	Tb927.8.1440		maoC-like dehydratase, putative	17.815	53.7	0	16.324	1	1		1	-0.212419	0.199997	0.698976		45.1	3	3	0.990589	-0.0136409	3.5183	7	45.1	3	3	0.85859	-0.219958	12.844	6	29.6	3	3	0.75594	-0.403656	4.7296	5
	2295	Tb927.3.4080;Tb927.3.4100;Tb927.3.4090;Tb927.3.4070;Tb927.3.4110	Tb927.3.4080;Tb927.3.4100;Tb927.3.4090;Tb927.3.4070;Tb927.3.4110		hypothetical protein, conserved;hypothetical protein, conserved;hypothetical protein, conserved;hypothetical protein, conserved;hypothetical protein, conserved	62.704	7.9	0	9.0753	5	1		1	-0.66191	0.200949	0.696913		4.9	2	2	0.579979	-0.785927	59.992	3	6.5	3	3	0.435161	-1.20038	86.751	4	3.5	2	2	1.0004	0.000576886	0.25774	2
	2416	Tb927.4.1420	Tb927.4.1420		hypothetical protein, conserved	15.664	35.8	0	21.228	1	1		1	-0.737535	0.204248	0.689843		35.8	3	3	0.374742	-1.41603	24.441	3	35.8	3	3	0.592487	-0.755144	13.632	3	15.7	1	1	0.97169	-0.0414319	NaN	1
	4073	Tb927.9.8680	Tb927.9.8680		cytochrome c oxidase assembly factor, putative	30.64	31	0	20.764	1	1		1	-0.278093	0.205333	0.687542		11.1	3	3	0.769172	-0.378623	60.565	3	26.9	5	5	0.720461	-0.473008	31.168	5	15.1	4	4	1.0121	0.0173518	41.222	3
	2954	Tb927.6.4130	Tb927.6.4130		hypothetical protein, conserved	11.734	55.8	0	40.733	1	1		1	-0.416149	0.20824	0.681436		43.3	4	4	0.638896	-0.646347	7.8887	6	43.3	4	4	0.641725	-0.639973	72.518	5	43.3	4	4	1.0266	0.0378742	22.119	4
	1705	Tb927.11.3940	Tb927.11.3940		hypothetical protein, conserved	36.265	9	0	5.8968	1	1			-0.531977	0.208326	0.681257		9	3	3	0.61024	-0.712552	5.8856	3	6.9	2	2	0.783822	-0.351402	4.1657	2	0	0	0	NaN		NaN	0
	1906	Tb927.11.7960	Tb927.11.7960		kinetoplast poly(A) polymerase 1	58.436	8.5	0	11.176	1	1		1	-0.315989	0.210082	0.67761		5.9	3	3	0.913743	-0.13014	20.386	3	5.9	3	3	0.897988	-0.155231	39.369	3	6.3	3	3	0.63174	-0.662597	4.1094	3
	2380	Tb927.3.750	Tb927.3.750		hypothetical protein, conserved	37.79	15	0	9.4293	1	1		1	-0.798028	0.212442	0.67276		15	4	4	0.3757	-1.41235	86.332	4	9.6	2	2	0.486239	-1.04026	62.666	2	6.9	2	2	1.0414	0.0585243	21.847	2
	3417	Tb927.8.2180	Tb927.8.2180		hypothetical protein, conserved	18.676	15.2	0	4.2436	1	1		1	-1.13586	0.213391	0.670824		15.2	1	1	0.345913	-1.53152	NaN	1	15.2	1	1	0.598659	-0.740194	NaN	1	0	0	0	NaN		NaN	0
	356	Tb927.4.3800;Tb11.v5.0905	Tb927.4.3800;Tb11.v5.0905		hypothetical protein, conserved;hypothetical protein, conserved	35.891	8.4	0	4.2136	2	1		1	-0.401323	0.214144	0.669294		8.4	2	2	0.55605	-0.846714	18.964	3	5.6	1	1	0.901307	-0.14991	NaN	1	5.6	1	1	0.86613	-0.207344	NaN	1
	4035	Tb927.9.7170	Tb927.9.7170		hypothetical protein, conserved	53.98	14.9	0	13.745	1	1			-0.561588	0.21574	0.666069		11.3	4	4	0.522931	-0.935309	49.938	6	12.5	4	4	0.569541	-0.812129	19.387	6	3.8	2	2	1.0444	0.0626743	84.934	2
	2801	Tb927.5.980	Tb927.5.980		hypothetical protein, conserved	35.065	28.2	0	6.2113	1	1			-0.479571	0.215935	0.665678		5.6	2	2	0.845881	-0.241474	49.197	2	18	2	2	0.494707	-1.01535	NaN	1	7.5	2	2	0.88155	-0.181886	124.09	2
	2393	Tb927.3.940	Tb927.3.940		hypothetical protein, conserved	18.107	34.4	0	7.7975	1	1			-0.408487	0.21662	0.664302		22.1	2	2	0.635809	-0.653335	21.404	3	9.1	1	1	0.649942	-0.621618	NaN	1	34.4	4	4	1.0349	0.0494913	40.779	6
	2310	Tb927.3.4480	Tb927.3.4480		hypothetical protein, conserved	17.043	7.4	0.00029028	3.6756	1	1		1	-0.424902	0.217495	0.662552		7.4	1	1	0.82713	-0.273814	NaN	1	7.4	1	1	0.670826	-0.57599	NaN	1	0	0	0	NaN		NaN	0
	348	Tb11.v5.0811;Tb927.10.10340	Tb11.v5.0811;Tb927.10.10340		structural maintenance of chromosome 2, putative;structural maintenance of chromosome 2, putative (SMC2)	92.678	3.9	0	5.2638	2	1		1	-0.130199	0.21881	0.659934		2.5	2	2	0.871992	-0.197614	27.451	2	1.1	1	1	0.864678	-0.209765	NaN	1	2.6	2	2	1.0117	0.0167816	28.34	2
	793	Tb927.10.2030	Tb927.10.2030		hypothetical protein, conserved	69.058	6.4	0.00028927	3.5944	1	1		1	-0.468087	0.223487	0.650748		3.6	2	2	0.641931	-0.63951	1.4453	2	2.8	1	1	0.814133	-0.296663	NaN	1	0	0	0	NaN		NaN	0
	2045	Tb927.2.2940	Tb927.2.2940		hypothetical protein, conserved	32.208	21.4	0	48.413	1	1			-0.106097	0.223813	0.650114		13.7	3	3	0.890313	-0.167615	26.741	6	9.7	2	2	0.891027	-0.166458	45.694	5	17.4	4	4	1.011	0.0157831	31.7	6
	1475	Tb927.11.15440	Tb927.11.15440		hypothetical protein, conserved	23.683	9.2	0	4.5439	1	1		1	1.14722	0.224602	0.648586		4.9	1	1	NaN		NaN	0	4.9	1	1	1.65267	0.724802	NaN	1	4.4	1	1	2.9683	1.56964	NaN	1
	3173	Tb927.7.3620	Tb927.7.3620		tyrosyl-tRNA synthetase, putative	76.657	43.5	0	82.327	1	1			0.204884	0.224897	0.648017		39.9	17	17	1.29705	0.375235	25.765	26	33.3	14	14	1.19864	0.261396	15.03	18	22.7	12	12	0.98488	-0.0219802	23.57	17
	165	Tb11.02.5105b;Tb11.02.5105	Tb11.02.5105b;Tb11.02.5105		hypothetical protein, conserved;hypothetical protein, conserved	14.971	41.5	0	15.181	2	1			-0.573801	0.226429	0.645069		26.9	2	2	0.470699	-1.08712	60.814	2	15.4	2	2	0.622898	-0.682933	37.129	2	26.2	2	2	1.0343	0.0486547	13.86	3
	2283	Tb927.3.3780;Tb927.3.3760	Tb927.3.3780;Tb927.3.3760	TXN1a	tryparedoxin;tryparedoxin (TRYP1)	15.891	80.6	0	41.593	2	1			-0.272572	0.226779	0.644396		55.6	6	6	0.974849	-0.0367494	15.366	22	80.6	8	8	0.865651	-0.208143	25.235	21	50	5	5	0.6723	-0.572823	20.257	9
	1264	Tb927.11.11380	Tb927.11.11380		hypothetical protein, conserved	61.504	48.5	0	104.79	1	1		1	-0.175166	0.23006	0.638159		41.3	13	13	0.805672	-0.311736	26.298	27	39.1	12	12	0.846955	-0.239642	17.936	23	21.5	9	9	1.0181	0.0258793	23.638	13
	2095	Tb927.2.4700	Tb927.2.4700		hypothetical protein, conserved	17.085	7.9	0	3.8257	1	1			-1.51808	0.230648	0.63705		7.9	1	1	0.645619	-0.631244	NaN	1	7.9	1	1	0.649646	-0.622274	NaN	1	7.9	1	1	0.10148	-3.30073	263.81	2
	875	Tb927.10.3510	Tb927.10.3510		hypothetical protein, conserved	197.82	2.8	0.0016194	2.6785	1	1		1	-0.242959	0.232246	0.634051		1	2	2	0.706364	-0.501515	13.83	4	1.8	3	3	0.857927	-0.221073	35.763	3	1.5	3	3	0.99565	-0.00628942	31.089	3
	1794	Tb927.11.570	Tb927.11.570		hypothetical protein, conserved	21.079	20.3	0	15.337	1	1		1	-0.565793	0.237362	0.62459		12.3	2	2	0.579509	-0.787098	32.822	2	20.3	3	3	0.787588	-0.344488	35.477	4	0	0	0	NaN		NaN	0
	282	Tb927.10.15650;Tb11.v5.0465	Tb927.10.15650;Tb11.v5.0465		tRNA pseudouridine synthase A-like protein;tRNA pseudouridine synthase A-like protein, putative	64.812	8.6	0	8.2113	2	1		1	-0.578422	0.241042	0.617907		8.6	3	3	0.412933	-1.27602	66.235	3	7.1	2	2	0.814465	-0.296076	61.33	2	1.6	1	1	0.89306	-0.163171	NaN	1
	4096	Tb927.9.9310	Tb927.9.9310		hypothetical protein, conserved	106.49	5	0	4.5898	1	1		1	-0.810336	0.241762	0.616612		5	3	3	0.293936	-1.76643	62.02	3	5	3	3	0.688326	-0.538836	30.269	3	1	1	1	0.91653	-0.125746	NaN	1
	3615	Tb927.8.6190	Tb927.8.6190		hypothetical protein, conserved	9.6682	24.1	0	8.2406	1	1			-0.455084	0.241804	0.616537		24.1	2	2	0.512663	-0.963918	25.679	5	24.1	2	2	0.763534	-0.389236	24.2	5	16.1	1	1	0.99165	-0.0120971	7.943	2
	3180	Tb927.7.3770	Tb927.7.3770		hypothetical protein, conserved	61.111	16.7	0	18.39	1	1		1	-0.138388	0.241836	0.616478		12.7	5	5	0.893416	-0.162597	16.776	6	12.2	5	5	1.01254	0.0179721	21.949	5	4.7	2	2	0.82901	-0.270539	1.5513	3
	3806	Tb927.9.12750	Tb927.9.12750		hypothetical protein, conserved	38.624	32.1	0	30.747	1	1		1	-0.44878	0.246623	0.607966		23	4	4	0.855871	-0.224534	32.516	5	29.4	6	6	0.91878	-0.122209	46.234	5	14.3	4	4	0.50014	-0.999596	47.803	5
	1880	Tb927.11.7330	Tb927.11.7330		hypothetical protein, conserved	23.281	18.1	0	4.6892	1	1			0.0525718	0.247772	0.605948		18.1	2	2	1.08475	0.117365	20.75	2	18.1	2	2	1.01808	0.0258524	40.405	2	9	1	1	1.0101	0.0144981	NaN	1
	4064	Tb927.9.8260	Tb927.9.8260	TimRhom I	rhomboid-like protein,serine peptidase, Clan S- , family S54, putative	36.786	17.9	0	44.258	1	1		1	-0.209837	0.247878	0.605762		13.4	3	3	0.771545	-0.374177	12.627	10	12.2	3	3	0.81103	-0.302173	2.4353	10	9.1	2	2	1.033	0.0468402	42.081	2
	3707	Tb927.8.8260;Tb927.8.8240;Tb927.8.8250	Tb927.8.8260;Tb927.8.8240;Tb927.8.8250		amino acid transporter, putative;amino acid transporter, putative;amino acid transporter, putative	49.461	2.8	0.0020899	2.3045	3	1			-0.374274	0.248063	0.605439		2.8	1	1	0.693529	-0.527971	NaN	1	2.8	1	1	0.858222	-0.220578	NaN	1	0	0	0	NaN		NaN	0
	2305	Tb927.3.4260	Tb927.3.4260		hypothetical protein, conserved	41.306	28.5	0	45.106	1	1		1	-0.139951	0.250539	0.601125		28.5	8	8	0.804246	-0.31429	36.128	17	26.4	6	6	0.971723	-0.0413831	6.5622	7	20.4	5	5	0.95649	-0.0641783	17.758	8
	1949	Tb927.11.8980	Tb927.11.8980	EF-G2	elongation factor G2-like protein	90.047	4.9	0	5.2157	1	1		1	-0.355347	0.251795	0.598953		2	1	1	0.655222	-0.609944	NaN	1	3.4	2	2	0.685495	-0.544782	25.797	3	3.4	2	2	1.0634	0.0886844	NaN	1
	2601	Tb927.4.720	Tb927.4.720		hypothetical protein, conserved	12.297	27.6	0	14.35	1	1		1	-0.285441	0.251825	0.5989		27.6	4	4	0.868734	-0.203013	21.991	5	27.6	3	3	0.646914	-0.628354	21.871	8	27.6	4	4	0.98285	-0.0249568	19.69	9
	2184	Tb927.3.1840	Tb927.3.1840		3-oxo-5-alpha-steroid 4-dehydrogenase, putative	33.355	41.3	0	122.1	1	1			-0.147256	0.25205	0.598514		41.3	17	17	0.864603	-0.20989	23.649	56	41.3	17	17	0.831324	-0.266517	10.016	49	30.2	12	12	1.0243	0.0346383	12.569	45
	2951	Tb927.6.4040	Tb927.6.4040		hypothetical protein, conserved	28.009	15.4	0	6.3682	1	1			-0.581116	0.252589	0.597585		4.1	1	1	0.502917	-0.991608	NaN	1	4.1	1	1	0.536193	-0.899176	NaN	1	11.2	2	2	1.1076	0.147437	54.4	2
	2408	Tb927.4.1280	Tb927.4.1280		hypothetical protein, conserved	43.863	8	0	12.94	1	1		1	-0.432841	0.252611	0.597548		6.3	2	2	0.624688	-0.678793	11.397	3	6.3	2	2	0.602809	-0.730227	NaN	1	1.8	1	1	1.0796	0.110497	NaN	1
	1082	Tb927.10.8090	Tb927.10.8090		hypothetical protein, conserved	17.195	13.5	0.0015806	2.4313	1	1		1	-0.87254	0.260491	0.584208		13.5	2	2	0.709975	-0.494159	91.447	2	0	0	0	NaN		NaN	0	7.1	1	1	0.42018	-1.25092	NaN	1
	3636	Tb927.8.6560	Tb927.8.6560		hypothetical protein, conserved	40.167	17.4	0	17.198	1	1		1	-1.08941	0.262789	0.580393		14.7	2	2	0.337621	-1.56652	4.5288	2	17.4	3	3	0.654151	-0.612305	36.706	4	0	0	0	NaN		NaN	0
	3064	Tb927.7.1600	Tb927.7.1600		C-1-tetrahydrofolate synthase, cytoplasmic, putative	31.931	9.1	0.0060286	1.752	1	1			-0.197654	0.262952	0.580124		3.7	1	1	0.821153	-0.284277	25.022	2	9.1	2	2	0.925926	-0.111031	22.551	2	0	0	0	NaN		NaN	0
	1687	Tb927.11.3690	Tb927.11.3690		hypothetical protein, conserved	41.465	9.3	0	4.4045	1	1			-0.200499	0.263254	0.579624		4.5	1	1	0.734484	-0.445197	NaN	1	9.3	2	2	0.999001	-0.00144202	NaN	1	4.5	1	1	0.89822	-0.154859	20.024	2
	1048	Tb927.10.7570;Tb11.v5.0774	Tb927.10.7570		dihydrolipoamide acetyltransferase E2 subunit, putative	48.107	62.1	0	323.31	2	1		1	-0.0871013	0.265156	0.576499		62.1	24	24	0.965624	-0.0504668	21.718	87	62.1	24	24	0.991572	-0.012211	14.807	84	61.9	22	22	0.87138	-0.198626	24.41	51
	2470	Tb927.4.2440	Tb927.4.2440		hypothetical protein, conserved	44.263	13.3	0	15.999	1	1		1	-0.629422	0.269381	0.569634		13.3	3	3	0.531124	-0.91288	35.42	3	13.3	3	3	0.786782	-0.345964	18.548	4	0	0	0	NaN		NaN	0
	632	Tb927.10.13510	Tb927.10.13510		zinc metallopeptidase, putative	62.779	49	0	67.884	1	1			-0.124126	0.270488	0.567852		35	12	12	0.994431	-0.00805654	45.945	18	35.5	14	14	0.82176	-0.283211	9.3615	18	34.1	13	13	0.94533	-0.08111	20.846	20
	1883	Tb927.11.7380	Tb927.11.7380		glycerol-3-phosphate dehydrogenase (FAD-dependent), mitochondrial	66.991	70.1	0	323.31	1	1			-0.11997	0.270846	0.567277		70.1	37	37	0.838926	-0.253384	9.8701	90	70	37	37	1.01538	0.022024	20.201	96	63.2	32	32	0.91475	-0.128551	8.66	76
	1134	Tb927.10.9070	Tb927.10.9070		hypothetical protein, conserved	65.927	3.5	0	5.1502	1	1		1	-0.427724	0.271182	0.566739		3.5	1	1	0.649857	-0.621806	NaN	1	3.5	1	1	0.850485	-0.233643	NaN	1	0	0	0	NaN		NaN	0
	3945	Tb927.9.3640	Tb927.9.3640		hypothetical protein, conserved	22.632	34.8	0	18.611	1	1		1	-0.665073	0.271904	0.565584		28.3	4	4	0.363412	-1.46032	60.359	7	31.3	4	4	0.657592	-0.604736	19.395	6	28.3	4	4	1.0496	0.0698396	45.845	6
	3231	Tb927.7.5130	Tb927.7.5130		hypothetical protein, conserved	26.377	18.9	0	5.7094	1	1			-0.302631	0.272339	0.564891		10.5	3	3	0.659457	-0.60065	2.4519	5	15.5	4	4	0.763592	-0.389126	2.5608	5	6.7	2	2	1.0584	0.081885	26.271	4
	2737	Tb927.5.3550	Tb927.5.3550		hypothetical protein, conserved	47.983	16.3	0	5.9899	1	1		1	-0.944174	0.272708	0.564302		13.7	4	4	0.363372	-1.46048	46.952	4	9.4	3	3	0.311769	-1.68145	23.9	3	1.9	1	1	1.2392	0.309409	NaN	1
	2132	Tb927.2.5930	Tb927.2.5930		hypothetical protein, conserved	60.489	8.4	0	9.4822	1	1		1	-0.177524	0.272731	0.564265		5.4	2	2	0.818063	-0.289716	9.6891	2	8	3	3	1.04196	0.0592994	49.874	3	5.7	2	2	0.81104	-0.302155	11.553	2
	266	Tb927.1.1130;Tb11.v5.0384	Tb927.1.1130;Tb11.v5.0384		glycerol-3-phosphate dehydrogenase (FAD-dependent), putative;glycerol-3-phosphate dehydrogenase (FAD-dependent),putative	66.174	5	0	4.3416	2	1		1	-0.116264	0.274704	0.561135		0	0	0	NaN		NaN	0	2.1	1	1	0.888968	-0.169797	NaN	1	2.9	1	1	0.95745	-0.062731	NaN	1
	2811	Tb927.6.1250	Tb927.6.1250		hypothetical protein, conserved	56.918	12	0	10.611	1	1			-0.784182	0.275216	0.560327		8.8	3	3	0.36673	-1.44721	35.008	2	3.2	1	1	0.446748	-1.16247	NaN	1	7	2	2	1.1951	0.257131	98.854	2
	2785	Tb927.5.740	Tb927.5.740		hypothetical protein, conserved	23.911	12.9	0.00056007	3.1096	1	1		1	-0.539682	0.277331	0.557002		7.7	1	1	0.607423	-0.719227	NaN	1	12.9	2	2	0.478744	-1.06267	26.169	2	7.7	1	1	1.1195	0.162855	84.565	2
	169	Tb11.02.5400b;Tb11.02.5400	Tb11.02.5400b;Tb11.02.5400		cystathionine beta-synthase, putative;cystathionine beta-synthase, putative	39.464	75.7	0	291.66	2	1			0.242442	0.27849	0.55519		75.7	16	16	1.47024	0.556054	40.382	29	68.5	15	15	0.9996	-0.000576859	25.275	24	41.2	9	9	1.1265	0.171847	27.022	15
	1720	Tb927.11.4330	Tb927.11.4330		hypothetical protein, conserved	21.02	30.7	0	51.152	1	1			-0.159771	0.278966	0.554449		5.3	1	1	0.904241	-0.145221	NaN	1	19.6	3	3	1.01436	0.0205746	25.404	3	25.4	3	3	0.78205	-0.354667	7.1482	3
	3168	Tb927.7.3520	Tb927.7.3520		mitochondrial pyruvate carrier protein 2, putative	14.849	33.6	0	18.655	1	1			-0.171499	0.280654	0.551829		33.6	3	3	0.83949	-0.252416	19.689	5	33.6	3	3	0.939143	-0.0905825	14.011	5	0	0	0	NaN		NaN	0
	1691	Tb927.11.3730	Tb927.11.3730	LeuRS	leucyl-tRNA synthetase, putative (LeuRS)	121.82	50.4	0	223.46	1	1			0.170943	0.281386	0.550697		40.2	32	32	1.26309	0.336956	18.092	46	37.2	28	28	1.17339	0.230685	10.856	39	32	23	23	0.96272	-0.0548118	22.886	32
	175	Tb927.10.1160;Tb11.0550	Tb927.10.1160;Tb11.0550		hypothetical protein, conserved;chrX additional, unordered contigs,hypothetical protein, conserved	17.503	11.5	0.00056481	3.2145	2	1		1	-0.391363	0.281906	0.549895		11.5	1	1	0.867077	-0.205768	NaN	1	11.5	1	1	0.670376	-0.576957	NaN	1	0	0	0	NaN		NaN	0
	886	Tb927.10.3650	Tb927.10.3650		NADH-dependent fumarate reductase, putative	133.53	26.8	0	73.129	1	1		1	-0.247228	0.28876	0.539464		20.6	18	14	0.777001	-0.364012	20.644	16	20.9	19	15	1.06645	0.092817	17.299	21	15.3	16	13	0.72172	-0.470489	16.744	15
	700	Tb927.10.14590	Tb927.10.14590		hypothetical protein, conserved	33.674	12.5	0.001581	2.4402	1	1		1	-0.146535	0.290069	0.537498		12.5	3	3	0.791014	-0.338225	1.8395	3	2.3	1	1	1.0095	0.0136401	NaN	1	10	2	2	0.92337	-0.115019	26.063	4
	3043	Tb927.7.1200	Tb927.7.1200		hypothetical protein, conserved	48.808	5.9	0	4.9369	1	1		1	-0.327593	0.291075	0.535995		2	1	1	0.624337	-0.679604	NaN	1	2	1	1	0.753012	-0.409255	NaN	1	5.9	2	2	1.0763	0.10608	21.394	2
	145	Tb06.3A7.270	Tb06.3A7.270		hypothetical protein, conserved	123.84	2.9	0.0067584	1.7225	1	1			-0.549142	0.29399	0.531667		1.6	1	1	0.565483	-0.822445	NaN	1	0	0	0	NaN		NaN	0	1.3	1	1	0.82597	-0.275839	NaN	1
	3232	Tb927.7.5160	Tb927.7.5160		deoxyuridine triphosphatase, putative,dUTP diphosphatase	31.943	27.5	0	29.325	1	1		1	-0.222346	0.296637	0.527774		24.4	7	7	0.982029	-0.0261627	16.874	10	18.1	7	7	0.930492	-0.103934	11.937	8	8.4	2	2	0.68923	-0.536943	5.8134	2
	208	Tb927.7.5080;Tb11.v5.0188	Tb927.7.5080;Tb11.v5.0188		ATP-NAD kinase-like protein;hypothetical protein, conserved	79.822	8.7	0.0011007	2.9152	2	1		1	-0.283889	0.297957	0.525847		5.3	2	2	0.743605	-0.427392	25.595	2	8.7	3	3	0.907276	-0.140386	12.057	3	0	0	0	NaN		NaN	0
	1844	Tb927.11.6570	Tb927.11.6570		hypothetical protein, conserved	67.604	18.1	0	57.692	1	1			-0.212401	0.29893	0.524431		16.4	10	10	0.847745	-0.238298	14.836	13	15.6	8	8	0.725426	-0.463099	11.823	11	11.3	6	6	1.0455	0.0641931	14.888	8
	224	Tb927.10.5220;Tb11.v5.0235	Tb927.10.5220;Tb11.v5.0235		hypothetical protein, conserved;hypothetical protein, conserved	51.172	6.3	0.00028986	3.645	2	1		1	-0.565875	0.301097	0.521294		2.2	1	1	0.5527	-0.855432	10.706	3	6.3	3	3	0.825696	-0.276318	55.608	3	0	0	0	NaN		NaN	0
	2928	Tb927.6.3570	Tb927.6.3570		tubulin-tyrosine ligase-like protein, conserved	71.692	3.6	0.00028785	3.48	1	1			-0.727804	0.301902	0.520134		3.6	2	2	0.46607	-1.10138	32.513	2	3.6	2	2	0.782289	-0.354226	2.7782	2	0	0	0	NaN		NaN	0
	1761	Tb927.11.5050	Tb927.11.5050	FHm	fumarate hydratase, class I (FHm)	61.344	70.8	0	223.43	1	1		1	-0.107775	0.302396	0.519424		66.5	27	27	0.966931	-0.0485152	41.451	53	65.6	28	28	0.991768	-0.0119249	20.649	54	44	18	18	0.83342	-0.262884	33.007	32
	3077	Tb927.7.190	Tb927.7.190	THOP1	thimet oligopeptidase A, putative,metallo- peptidase, Clan MA(E) Family M3, putative (OPA)	84.166	43.1	0	243.67	1	1			-0.119787	0.30553	0.514947		41.7	26	26	1.03405	0.0483078	20.365	50	39.4	24	24	0.842318	-0.247563	16.307	41	33	21	21	0.89496	-0.160105	11.905	38
	2153	Tb927.3.1180	Tb927.3.1180		hypothetical protein, conserved	93.288	2.9	0	9.0453	1	1		1	-0.34074	0.306658	0.513345		2.9	2	2	0.64512	-0.632361	11.707	2	2.9	2	2	0.684182	-0.547548	17.038	2	1.1	1	1	1.1155	0.15769	NaN	1
	3443	Tb927.8.2670	Tb927.8.2670		hypothetical protein, conserved	49.125	11.9	0	8.6438	1	1		1	-0.280602	0.312761	0.504787		11.9	3	3	0.616713	-0.697329	14.636	4	11.9	3	3	0.978857	-0.0308304	0.77607	6	7	2	2	0.92425	-0.113645	10.633	3
	3625	Tb927.8.6390	Tb927.8.6390	TbLysoPLA	lysophospholipase, putative,alpha/beta hydrolase, putative (TbLysoPLA)	30.092	75	0	153.57	1	1			-0.128128	0.313761	0.503402		75	15	15	0.966557	-0.0490732	8.9165	35	75	15	15	0.988924	-0.0160683	13.322	34	67.1	13	13	0.80149	-0.319243	14.985	25
	3243	Tb927.7.540	Tb927.7.540		chaperone protein DNAj, putative	50.644	21.4	0	32.646	1	1			-0.217857	0.317563	0.498171		17.7	6	6	0.726639	-0.46069	24.247	9	17.7	6	6	0.817929	-0.289952	21.257	11	10.3	4	4	1.0696	0.0970714	7.1046	11
	3080	Tb927.7.2070	Tb927.7.2070		heat shock protein DNAJ, putative	36.377	46.6	0	32.363	1	1			0.314287	0.318362	0.497078		41.5	12	12	1.72974	0.790559	17.25	21	32.6	8	8	1.03651	0.0517282	18.059	12	19.5	6	6	1.0722	0.100574	44.878	12
	1382	Tb927.11.13710	Tb927.11.13710		hypothetical protein, conserved	20.895	21.1	0	14.677	1	1			-0.553163	0.322849	0.491001		14.1	2	2	0.400497	-1.32014	68.693	2	14.1	2	2	0.713419	-0.487178	98.113	2	7	1	1	1.1079	0.147828	NaN	1
	3616	Tb927.8.620	Tb927.8.620	KREPA3	KREPA3,RNA-editing complex protein MP42 (KREPA3)	42.267	10.9	0	20.255	1	1		1	-0.198828	0.329139	0.482621		10.9	4	4	0.739262	-0.435842	7.5487	7	6.1	2	2	0.838293	-0.254473	3.4748	3	7.9	3	3	1.0672	0.0938305	21.707	4
	3311	Tb927.7.6930	Tb927.7.6930		ATPase, putative	55.82	9	0.00057339	3.4289	1	1		1	-0.237823	0.329528	0.482107		7.1	3	3	1.01688	0.0241498	50.041	4	6.5	3	3	0.907606	-0.139862	43.288	4	2.2	1	1	0.66078	-0.597758	NaN	1
	4019	Tb927.9.6620	Tb927.9.6620		unspecified product	25.522	23.9	0	15.758	1	1			-0.650399	0.330467	0.480872		20.6	4	4	1.18364	0.243233	59.412	5	16.7	3	3	0.347753	-1.52386	5.9326	6	17.7	5	5	0.62826	-0.670566	65.296	9
	2828	Tb927.6.1590	Tb927.6.1590		hypothetical protein, conserved	51.554	6.4	0	11.203	1	1			-0.149365	0.352579	0.452743		3.4	1	1	0.961261	-0.0569997	NaN	1	0	0	0	NaN		NaN	0	3	1	1	0.84573	-0.241731	NaN	1
	585	Tb927.10.1260	Tb927.10.1260		aspartyl-tRNA synthetase, putative	60.842	13.9	0	8.8303	1	1		1	0.118556	0.359304	0.444538		1.7	1	1	1.04067	0.0575119	NaN	1	7.2	3	3	1.24389	0.314858	34.409	4	11.1	5	5	0.98849	-0.0167017	20.138	5
	3384	Tb927.8.1580	Tb927.8.1580		hypothetical protein, conserved	31.532	13	0	5.956	1	1		1	-0.206218	0.361203	0.442249		6.9	1	1	0.709975	-0.494159	NaN	1	10.5	2	2	0.848824	-0.236462	29.74	3	2.5	1	1	1.0807	0.111966	NaN	1
	1429	Tb927.11.1450	Tb927.11.1450		2-oxoglutarate dehydrogenase E1 component, putative	113.38	68	0	323.31	1	1		1	-0.0915758	0.363508	0.439485		67.8	59	59	0.841822	-0.248413	13.824	229	67.9	60	60	0.987654	-0.017922	13.845	232	62.3	55	55	0.9942	-0.008392	15.466	164
	4062	Tb927.9.8210	Tb927.9.8210		Peptide deformylase 2	42.101	11.5	0	11.889	1	1		1	-0.512902	0.36849	0.433574		11.5	3	3	0.555525	-0.848077	56.305	3	3.3	1	1	0.884095	-0.177727	NaN	1	0	0	0	NaN		NaN	0
	3507	Tb927.8.4250	Tb927.8.4250		hypothetical protein, conserved	47.403	15.4	0	6.6713	1	1			1.04445	0.36851	0.433551		7.3	2	2	7.22074	2.85215	227.44	2	15.4	5	5	1.20402	0.267861	175.95	4	2.4	1	1	1.0093	0.013355	NaN	1
	3211	Tb927.7.4310	Tb927.7.4310		hypothetical protein, conserved	53.736	27.9	0	26.448	1	1			-0.0940397	0.373865	0.427285		24.1	6	6	0.846668	-0.240131	16.121	4	18	5	5	0.940468	-0.0885487	27.838	5	7.8	2	2	1.0328	0.0465608	8.4446	3
	907	Tb927.10.4130	Tb927.10.4130		NDUFA5/B13 subunit, putative	31.032	23.8	0	15.516	1	1		1	-0.838821	0.375157	0.425787		23.8	5	5	0.286952	-1.80112	27.849	8	14.3	3	3	0.396652	-1.33405	39.33	4	13.2	3	3	1.5355	0.618709	73.86	4
	2879	Tb927.6.2510	Tb927.6.2510		hypothetical protein, conserved	16.92	30.8	0	41.996	1	1		1	-0.245616	0.375685	0.425176		30.8	3	3	0.648382	-0.625083	77.441	8	22.6	2	2	0.847099	-0.239398	1.6252	3	17.8	2	2	1.0925	0.127633	20.091	6
	1147	Tb927.10.9390	Tb927.10.9390		hypothetical protein, conserved	36.684	15.3	0	4.2693	1	1			-0.46383	0.378657	0.421754		5.5	1	1	0.583328	-0.77762	NaN	1	15.3	3	3	0.901226	-0.15004	127.25	3	0	0	0	NaN		NaN	0
	2207	Tb927.3.2230	Tb927.3.2230		succinyl-CoA synthetase alpha subunit, putative	31.464	75.4	0	323.31	1	1		1	-0.0692286	0.37883	0.421555		75.4	18	18	0.888099	-0.171207	7.5398	141	75.4	18	18	1.02962	0.0421152	8.0218	154	69.1	14	14	0.94698	-0.0785942	9.1541	83
	2975	Tb927.6.4510	Tb927.6.4510		hypothetical protein, conserved	36.573	11.1	0.0045837	1.9557	1	1		1	-0.451792	0.380808	0.419294		8	2	2	0.590633	-0.759667	22.099	2	3.1	1	1	0.905059	-0.143916	NaN	1	0	0	0	NaN		NaN	0
	3964	Tb927.9.4310	Tb927.9.4310		tricarboxylate carrier, putative	35.625	43.4	0	62.258	1	1			0.0477851	0.381835	0.418125		41.3	10	10	1.0389	0.0550517	102.73	19	41.3	10	10	1.08546	0.118304	8.0614	20	30	8	8	0.97942	-0.0300004	10.822	17
	3903	Tb927.9.2110	Tb927.9.2110		hypothetical protein, conserved	13.122	56.6	0	21.143	1	1			-1.30864	0.382764	0.417069		39.8	3	3	0.873591	-0.19497	14.651	5	30.1	3	3	0.956297	-0.0644689	5.817	5	7.1	1	1	0.078755	-3.66648	NaN	1
	2177	Tb927.3.1730	Tb927.3.1730		hypothetical protein, conserved	25.482	33.8	0	19.539	1	1		1	-0.0673417	0.388613	0.410483		29.4	4	4	0.959601	-0.0594936	20.112	8	33.8	5	5	1.02475	0.0352686	14.667	10	22.9	3	3	0.88405	-0.1778	44.385	5
	1498	Tb927.11.15860;Tb927.11.15840	Tb927.11.15860;Tb927.11.15840		L-Lysine transport protein, putative;L-Lysine transport protein, putative	50.086	4.8	0	7.4784	2	1			-0.588088	0.393461	0.405099		4.8	2	2	0.505536	-0.984115	10.659	4	4.8	2	2	0.414748	-1.26969	21.972	5	4.8	2	2	1.404	0.489543	46.48	2
	3708	Tb927.8.8300	Tb927.8.8300		amino acid transporter, putative	50.17	15.7	0	75.42	1	1			-0.516992	0.400941	0.396919		15.7	6	6	0.866401	-0.206893	27.703	18	15.7	6	6	0.359829	-1.47462	21.329	16	10.6	4	4	1.0947	0.130536	18.913	9
	2920	Tb927.6.3350	Tb927.6.3350	YCF45	hypothetical protein, conserved (YCF45)	59.527	20.3	0	18.377	1	1		1	-0.113421	0.402792	0.394919		20.3	7	7	1.06563	0.0917098	24.953	7	7.7	4	4	0.827609	-0.272979	34.62	4	8.7	4	4	0.89565	-0.158993	10.101	3
	1280	Tb927.11.11680	Tb927.11.11680		2-oxoglutarate dehydrogenase E2 component, putative	41.143	77.3	0	284.91	1	1		1	-0.0684968	0.404867	0.392687		76.8	23	23	0.886918	-0.173128	14.094	113	69.2	20	20	1.03656	0.0518029	9.8086	110	56.4	19	19	0.94333	-0.0841656	16.86	83
	3692	Tb927.8.7770	Tb927.8.7770		hypothetical protein, conserved	60.341	7	0	3.9648	1	1		1	0.22382	0.410763	0.386409		7	2	2	1.31247	0.392289	80.454	2	7	2	2	1.03911	0.0553515	9.9924	3	0	0	0	NaN		NaN	0
	2502	Tb927.4.330	Tb927.4.330		hypothetical protein, conserved	43.016	29	0	17.706	1	1		1	-0.204444	0.413677	0.383339		17.9	5	5	0.664805	-0.588996	16.329	7	17.7	5	5	0.929282	-0.105812	14.256	7	13.2	4	4	1.0581	0.081476	48.211	4
	3548	Tb927.8.5100	Tb927.8.5100		hypothetical protein, conserved	313.77	0.8	0.0015919	2.5187	1	1		1	-0.794822	0.416708	0.380168		0	0	0	NaN		NaN	0	0.6	1	1	0.377672	-1.40479	NaN	1	0.3	1	1	0.87974	-0.184851	NaN	1
	1334	Tb927.11.12850	Tb927.11.12850	OPB	oligopeptidase b,serine peptidase, clan SC, family S9A-like protein (OPB)	80.572	47.8	0	300.16	1	1			0.118383	0.422624	0.374046		46	23	23	1.17797	0.2363	14.525	50	46	23	23	1.17872	0.237217	19.343	53	37.2	20	20	0.92123	-0.118367	20.441	33
	1135	Tb927.10.9080	Tb927.10.9080		pteridine transporter, putative	69.998	23.4	0	63.04	1	1			-1.00623	0.422977	0.373683		19.7	11	10	0.511431	-0.96739	15.428	20	23.4	13	12	0.14664	-2.76964	81.101	20	14.7	7	7	1.6453	0.718351	33.014	12
	1505	Tb927.11.15950;Tb927.11.15960	Tb927.11.15950;Tb927.11.15960		amino acid transporter, putative;amino acid transporter, putative	54.191	10.1	0	11.174	2	1			0.100392	0.423898	0.372738		4.8	2	2	0.985028	-0.021764	9.0861	2	10.1	4	4	1.2313	0.300182	3.9338	3	2.8	1	1	1.0159	0.0227584	NaN	1
	1138	Tb927.10.9140	Tb927.10.9140		hypothetical protein, conserved	71.858	7.5	0.0016129	2.6378	1	1			-0.182301	0.42422	0.372409		4.2	1	1	1.03892	0.0550816	NaN	1	1.4	1	1	0.959509	-0.0596321	NaN	1	3.3	2	2	0.68665	-0.542353	NaN	1
	2826	Tb927.6.1570	Tb927.6.1570		2-hydroxy-3-oxopropionate reductase, putative	31.753	47.7	0	63.93	1	1		1	-0.165477	0.424515	0.372107		44.3	7	7	1.02368	0.0337616	19.908	12	44.3	7	7	0.976372	-0.0344974	25.162	15	33	6	6	0.70922	-0.495695	5.9835	8
	1304	Tb927.11.12160	Tb927.11.12160		hypothetical protein, conserved	23.492	21	0	10.035	1	1		1	-0.261587	0.424944	0.371668		9	1	1	0.731261	-0.451541	19.554	2	21	3	3	0.66357	-0.591679	27.095	2	4	1	1	1.1962	0.258459	29.055	2
	2415	Tb927.4.1370	Tb927.4.1370		hypothetical protein, conserved	17.643	19.2	0	5.8929	1	1			-0.233204	0.425015	0.371596		7.3	1	1	0.96637	-0.049352	NaN	1	11.9	1	1	0.748951	-0.417056	NaN	1	0	0	0	NaN		NaN	0
	1430	Tb927.11.14520	Tb927.11.14520		Polypeptide deformylase 1	29.64	12.3	0	14.486	1	1		1	-0.435173	0.427846	0.368713		0	0	0	NaN		NaN	0	12.3	2	2	0.581801	-0.781402	NaN	1	12.3	2	2	0.94021	-0.0889451	18.437	5
	3721	Tb927.9.10080	Tb927.9.10080		phosphatidylserine decarboxylase, putative	39.735	17.7	0	10.152	1	1		1	-0.179242	0.43096	0.365563		14	3	3	0.779545	-0.359296	37.796	4	14	3	3	1.13843	0.18705	31.75	4	7.3	2	2	0.77621	-0.365481	6.5547	2
	344	Tb927.11.15780;Tb11.v5.0771	Tb927.11.15780;Tb11.v5.0771		hypothetical protein, conserved;hypothetical protein, conserved	10.98	32.7	0	12.107	2	1			0.280736	0.436196	0.360318		24.5	1	1	1.42422	0.510169	NaN	1	0	0	0	NaN		NaN	0	32.7	2	2	1.0362	0.0513026	30.514	3
	3091	Tb927.7.2200	Tb927.7.2200	Tim 9	hypothetical protein, conserved	8.8073	62.8	0	23.914	1	1		1	0.138896	0.441898	0.354678		62.8	5	5	1.34262	0.425056	33.41	7	62.8	5	5	1.03264	0.0463399	20.499	10	53.8	4	4	0.96279	-0.054707	30.844	6
	1728	Tb927.11.4490	Tb927.11.4490		long-chain-fatty-acid-CoA ligase, putative,acyl-CoA synthetase, putative,fatty acid thiokinase (long chain), putative	73.435	9.6	0	18.442	1	1		1	-0.13259	0.452668	0.34422		5.7	3	3	0.757461	-0.400756	14.844	3	5.7	3	3	0.941886	-0.0863762	14.218	6	5	3	3	1.0639	0.0893625	14.816	4
	804	Tb927.10.2230	Tb927.10.2230		adrenodoxin reductase, putative,ferredoxin NADP reductase-like protein	65.601	8.2	0	4.0895	1	1		1	-0.197031	0.455137	0.341858		8.2	2	2	1.08124	0.112693	37.851	3	1.8	1	1	0.936242	-0.0950467	NaN	1	8.2	2	2	0.65577	-0.608738	NaN	1
	2834	Tb927.6.1680	Tb927.6.1680	MRB1680	mitochondrial RNA binding protein 1 (MRB1680)	58.05	15.1	0	22.895	1	1		1	-0.209816	0.459694	0.337531		12.2	5	5	0.717927	-0.478092	38.791	8	7.4	3	3	1.18936	0.250183	61.389	6	4.8	2	2	0.75705	-0.40154	2.8075	2
	3935	Tb927.9.3370	Tb927.9.3370	trx	thioredoxin (trx)	12.135	40.2	0	32.472	1	1			-0.0561027	0.471722	0.326314		40.2	4	4	1.02027	0.028955	11.895	4	40.2	4	4	0.882145	-0.180912	7.6396	5	29.9	3	3	0.98873	-0.0163515	28.762	6
	1084	Tb927.10.8110	Tb927.10.8110		hypothetical protein, conserved	30.41	8.8	0.00056577	3.2481	1	1		1	-0.817195	0.474407	0.323849		4	1	1	0.33653	-1.57119	NaN	1	0	0	0	NaN		NaN	0	8.8	2	2	0.95714	-0.0631981	23.792	2
	1490	Tb927.11.15650;Tb11.v5.0667	Tb927.11.15650;Tb11.v5.0667		poly(A) polymerase, putative;poly(A) polymerase, putative	37.656	14.4	0	5.3289	2	1			-0.0897333	0.477276	0.32123		14.4	4	4	0.943931	-0.0832474	35.651	5	14.4	4	4	1.06155	0.0861704	2.2237	6	7.2	2	2	0.8281	-0.272123	40.217	2
	265	Tb927.1.1330;Tb11.v5.0371	Tb927.1.1330;Tb11.v5.0371	MEAT1	Mitochondrial Editosome-like Complex TUTase (MEAT1);hypothetical protein, conserved	46.764	20.9	0	21.799	2	1			-0.119701	0.485249	0.314036		12.8	3	3	0.757633	-0.400429	31.864	3	15.5	4	4	0.998602	-0.00201834	26.896	4	6.2	2	2	1.0305	0.0433446	30.412	3
	1164	Tb927.10.9790	Tb927.10.9790		hypothetical protein, conserved	21.034	16	0	9.1994	1	1		1	-0.617501	0.486929	0.312535		16	2	2	0.858516	-0.220082	NaN	1	16	2	2	0.244224	-2.03372	190.22	2	11	1	1	1.3207	0.401303	NaN	1
	2950	Tb927.6.4030	Tb927.6.4030		superoxide dismutase, putative	29.652	9.5	0.0074701	1.6541	1	1		1	-0.0823332	0.486954	0.312512		3.8	1	1	0.993542	-0.0093472	0.58058	3	9.5	2	2	0.82631	-0.275245	8.2282	2	3.8	1	1	1.0264	0.037593	NaN	1
	3648	Tb927.8.6800	Tb927.8.6800		hypothetical protein, conserved	64.661	7.5	0	12.734	1	1			-0.238581	0.488275	0.311336		7.5	2	2	0.7227	-0.468531	66.324	2	7.5	2	2	0.994036	-0.0086304	84.991	2	0	0	0	NaN		NaN	0
	3837	Tb927.9.13780	Tb927.9.13780		hypothetical protein, conserved	33.466	10.9	0	6.3935	1	1		1	-0.592825	0.488669	0.310985		8.2	1	1	0.445991	-1.16491	NaN	1	0	0	0	NaN		NaN	0	2.7	1	1	0.98573	-0.0207355	NaN	1
	394	Tb927.1.1770	Tb927.1.1770		glutaredoxin, putative	12.152	28	0	4.9497	1	1			0.618229	0.502513	0.298852		9.3	1	1	4.41579	2.14267	NaN	1	9.3	1	1	0.895817	-0.158725	NaN	1	28	3	3	0.9143	-0.12926	31.107	3
	1968	Tb927.11.9390	Tb927.11.9390		lipoate-protein ligase, putative,lipoyltransferase, putative	29.64	15.8	0	8.3948	1	1		1	-0.131877	0.505177	0.296557		0	0	0	NaN		NaN	0	7.5	1	1	0.83167	-0.265917	NaN	1	8.3	2	2	1.0015	0.00216244	NaN	1
	635	Tb927.10.13620	Tb927.10.13620		NADH-ubiquinone oxidoreductase complex I subunit,FT putative	54.791	14.6	0	8.7028	1	1		1	-0.745839	0.50613	0.295737		2.9	1	1	0.226809	-2.14045	NaN	1	10.3	3	3	0.463113	-1.11056	59.514	3	4.3	2	2	2.0188	1.0135	6.7716	2
	2725	Tb927.5.3330	Tb927.5.3330		hypothetical protein, conserved	521.76	0.6	0.0015827	2.4601	1	1			0.746758	0.506717	0.295235		0.3	1	1	0.989022	-0.0159258	NaN	1	0	0	0	NaN		NaN	0	0.3	1	1	2.847	1.50944	NaN	1
	2929	Tb927.6.3600	Tb927.6.3600		hypothetical protein, conserved	49.213	4.3	0.0015873	2.4747	1	1		1	-0.0639299	0.507312	0.294725		4.3	2	2	0.971345	-0.0419438	44.141	2	4.3	2	2	1.04395	0.0620531	19.345	2	4.3	2	2	0.8634	-0.211899	15.951	3
	1131	Tb927.10.9000	Tb927.10.9000		hypothetical protein, conserved	181.55	5.1	0	4.443	1	1		1	-0.345403	0.508756	0.293491		0	0	0	NaN		NaN	0	3.2	2	2	0.615385	-0.70044	40.363	2	2	3	2	1.0067	0.00963388	40.811	2
	2765	Tb927.5.4120	Tb927.5.4120		hypothetical protein, conserved	22.32	8.4	0	4.0107	1	1			-0.39103	0.509663	0.292717		8.4	2	2	0.540921	-0.886511	36.699	2	4.2	1	1	0.543951	-0.878451	3.4387	2	8.4	2	2	1.5072	0.591871	56.894	3
	3975	Tb927.9.5000	Tb927.9.5000		hypothetical protein, conserved	31.326	6.2	0.0016273	2.7583	1	1			-0.414834	0.516565	0.286875		6.2	1	1	0.554078	-0.851839	NaN	1	6.2	1	1	1.01549	0.0221707	NaN	1	0	0	0	NaN		NaN	0
	910	Tb927.10.4240	Tb927.10.4240		hypothetical protein, conserved	14.753	48.3	0	23.141	1	1		1	-0.628428	0.524513	0.280244		48.3	8	8	0.447908	-1.15872	9.0707	16	48.3	8	8	0.305409	-1.71119	47.973	14	28.3	5	5	1.9788	0.984626	87.649	6
	2329	Tb927.3.4890	Tb927.3.4890		ubiquinone biosynthesis protein COQ7 homolog, putative	22.874	25.5	0	14.228	1	1		1	-0.424172	0.532354	0.273799		20.1	3	3	0.435331	-1.19981	13.385	3	17.2	3	3	0.593542	-0.752577	8.0875	2	11.8	2	2	1.602	0.679874	44.255	3
	783	Tb927.10.1900	Tb927.10.1900		DNA topoisomerase IA, putative	88.925	17.9	0	16.099	1	1			-0.233856	0.536396	0.270515		17.9	9	9	0.625078	-0.677892	46.221	8	8.4	4	4	0.757117	-0.401412	5.8671	4	2.6	1	1	1.2993	0.377735	NaN	1
	3299	Tb927.7.6660	Tb927.7.6660		chaperone protein DNAj, putative	29.887	32.3	0	17.444	1	1		1	-0.417832	0.55825	0.253171		17.1	3	3	0.486973	-1.03808	15.067	5	21.8	4	4	0.500902	-0.997401	8.0342	5	22.2	4	4	1.7195	0.781989	64.225	5
	628	Tb927.10.13430	Tb927.10.13430		citrate synthase, putative	53.584	43.6	0	159.51	1	1		1	0.112715	0.560789	0.2512		36.2	18	18	1.29147	0.369017	53.191	42	41.5	18	18	1.11659	0.159106	16.817	38	35.5	15	15	0.87662	-0.189977	9.6529	28
	1863	Tb927.11.6850	Tb927.11.6850		hypothetical protein, conserved	26.513	12.5	0	5.1145	1	1		1	-0.0371407	0.562072	0.250208		8.8	3	3	1.04892	0.068907	17.281	2	12.5	4	4	0.95048	-0.0732718	11.884	5	3.8	1	1	0.92848	-0.107057	NaN	1
	1492	Tb927.11.15700	Tb927.11.15700		hypothetical protein, conserved	19.138	15.5	0	7.1601	1	1			-0.224917	0.568833	0.245015		15.5	2	2	0.652997	-0.614851	1.1429	3	15.5	2	2	0.708516	-0.497127	12.079	3	8.7	1	1	1.354	0.437228	NaN	1
	3314	Tb927.7.6990	Tb927.7.6990		hypothetical protein, conserved	32.721	32.3	0	16.621	1	1			-0.391581	0.574916	0.240395		29.7	5	5	0.587027	-0.768502	7.2941	6	8.3	2	2	0.444188	-1.17076	15.586	4	15	4	4	1.6988	0.764516	51.52	4
	2775	Tb927.5.530	Tb927.5.530		hypothetical protein, conserved	71.4	3.8	0	5.5263	1	1		1	-0.194846	0.577914	0.238137		2.6	1	1	0.609125	-0.715191	NaN	1	3.8	2	2	0.883392	-0.178874	12.481	3	1.2	1	1	1.2393	0.309525	NaN	1
	3041	Tb927.7.1130	Tb927.7.1130	TDPX2	trypanothione/tryparedoxin dependent peroxidase 2,glutathione peroxidase-like 2 (TDPX2)	18.873	66.3	0	69.574	1	1			0.167003	0.578334	0.237821		66.3	12	3	1.39421	0.479452	3.8053	8	66.3	12	3	1.28123	0.357529	9.7666	7	52.1	10	2	0.79225	-0.335972	24.413	4
	3071	Tb927.7.1720	Tb927.7.1720	HIRIP5	HIRA-interacting protein 5, putative (HIRIP5)	31.096	10.7	0	5.2857	1	1		1	-0.14789	0.579246	0.237137		10.7	2	2	0.897827	-0.15549	52.233	2	10.7	2	2	1.18623	0.246378	39.983	2	10.7	2	2	0.69037	-0.534558	12.403	2
	1870	Tb927.11.7040	Tb927.11.7040		pterin-4-alpha-carbinolamine dehydratase, putative	14.237	42.7	0	15.299	1	1		1	-0.147031	0.586461	0.231761		37.1	4	4	0.704523	-0.505281	6.3186	9	37.1	4	4	0.861697	-0.214747	4.1032	8	42.7	5	5	1.2133	0.278936	22.553	8
	2894	Tb927.6.2790;REV__Tb927.6.2790	Tb927.6.2790		L-threonine 3-dehydrogenase, putative	36.957	76.2	0	315.7	2	1			-0.052399	0.586899	0.231436		76.2	19	19	0.911162	-0.134221	12.665	75	76.2	19	19	1.07995	0.110963	6.4248	79	48.5	13	13	0.91134	-0.133939	10.64	41
	2085	Tb927.2.4445	Tb927.2.4445		hypothetical protein, conserved	15.441	44.4	0	28.765	1	1			-0.0737371	0.590615	0.228696		33.1	2	2	0.835771	-0.25882	28.72	4	20.3	2	2	1.1023	0.140523	NaN	1	44.4	3	3	0.93115	-0.102914	32.938	6
	3493	Tb927.8.3960	Tb927.8.3960		hypothetical protein, conserved	45.018	14.9	0	16.535	1	1		1	-0.152314	0.601641	0.220662		14.9	4	4	0.655824	-0.60862	33.092	4	5.9	2	2	0.93791	-0.0924781	18.193	2	7.6	2	2	1.1844	0.244156	49.931	2
	2196	Tb927.3.2080	Tb927.3.2080		hypothetical protein, conserved	30.66	27.7	0	22.114	1	1			-0.186023	0.603454	0.219356		25	5	5	0.786411	-0.346645	15.102	9	19.6	4	4	0.653168	-0.614474	19.215	9	6.5	2	2	1.3223	0.403049	22.614	5
	3321	Tb927.7.7080	Tb927.7.7080		mitochondrial glycoprotein-like protein	41.205	21.8	0	21.315	1	1		1	-0.265421	0.624001	0.204815		15.1	3	3	0.586201	-0.770533	9.4565	8	19.6	4	4	0.622432	-0.684011	18.817	6	7.5	2	2	1.5782	0.65828	NaN	1
	3592	Tb927.8.580	Tb927.8.580		hypothetical protein, conserved	40.102	16.9	0	30.876	1	1			-0.0516654	0.626629	0.20299		10.4	3	3	0.96302	-0.0543624	43.206	8	13.2	4	4	0.866026	-0.207518	34.081	4	14.1	4	4	1.0769	0.106884	21.042	6
	2113	Tb927.2.5140	Tb927.2.5140		hypothetical protein, conserved	17.408	22.1	0	9.7068	1	1		1	0.486856	0.631716	0.199478		0	0	0	NaN		NaN	0	7.4	1	1	2.34957	1.2324	NaN	1	14.8	2	2	0.83585	-0.258684	9.5305	3
	973	Tb927.10.5900	Tb927.10.5900		hypothetical protein, conserved	51.739	7.1	0.0016051	2.6016	1	1		1	-0.276372	0.637835	0.195292		7.1	2	2	1.13658	0.184703	50.515	2	7.1	2	2	1.2036	0.267357	32.787	2	2.8	1	1	0.41146	-1.28118	NaN	1
	1633	Tb927.11.2690	Tb927.11.2690		succinyl-coA:3-ketoacid-coenzyme A transferase, mitochondrial precursor, putative	53.096	58.2	0	323.31	1	1			0.080297	0.648118	0.188346		58.2	19	19	1.00035	0.000505025	7.592	75	58.2	19	19	1.2946	0.372505	16.685	76	48.1	16	16	0.91249	-0.132119	16.032	40
	236	Tb927.7.4480;Tb11.v5.0261	Tb927.7.4480;Tb11.v5.0261		adenosine 5-monophosphoramidase, putative;adenosine 5-monophosphoramidase, putative	15.55	56.7	0	29.02	2	1			0.142727	0.650617	0.186675		56.7	5	5	1.43686	0.522924	10.669	11	56.7	6	6	1.21953	0.286322	9.5975	12	21.3	3	3	0.76787	-0.381066	8.6314	6
	1553	Tb927.11.16730	Tb927.11.16730	GCVL-2	dihydrolipoyl dehydrogenase (GCVL-2)	50.433	77.1	0	323.31	1	1			0.0402859	0.654422	0.184142		77.1	32	32	0.956572	-0.0640551	10.359	163	77.1	31	31	1.14185	0.191376	7.9571	162	74.6	28	28	0.99553	-0.0064632	19.83	113
	1004	Tb927.10.670	Tb927.10.670		hypothetical protein, conserved	26.877	11.5	0	5.0482	1	1		1	-0.0976849	0.659683	0.180665		11.5	2	2	0.833542	-0.262674	16.308	2	4.4	1	1	1.04776	0.0673039	NaN	1	0	0	0	NaN		NaN	0
	357	Tb927.4.3080;Tb11.v5.0963	Tb927.4.3080;Tb11.v5.0963		hypothetical protein, conserved;hypothetical protein, conserved	18.44	19.4	0.00057176	3.3897	2	1		1	-0.0332695	0.665823	0.176641		19.4	2	2	1.0169	0.0241791	8.2207	3	10.9	1	1	0.939055	-0.090718	39.362	2	0	0	0	NaN		NaN	0
	3133	Tb927.7.2980;Tb927.7.3020	Tb927.7.2980;Tb927.7.3020		hypothetical protein, conserved;hypothetical protein, conserved	21.242	83.7	0	284.63	2	1			0.165149	0.677206	0.169279		83.7	15	15	1.78843	0.838693	16.324	46	76.3	14	14	0.956297	-0.0644689	16.898	38	66.3	12	12	0.82429	-0.278776	18.751	30
	983	Tb927.10.6170	Tb927.10.6170		hypothetical protein, conserved	163.96	1.7	0.0020877	2.3003	1	1		1	-0.100116	0.677404	0.169153		0	0	0	NaN		NaN	0	1.1	1	1	0.823316	-0.280481	NaN	1	0.5	1	1	1.0572	0.0802483	NaN	1
	3834	Tb927.9.13580	Tb927.9.13580		hypothetical protein, conserved	48.929	19.9	0	25.803	1	1			-0.169755	0.679222	0.167989		14.5	5	5	0.778331	-0.361544	12.669	7	14.9	5	5	0.630756	-0.664847	3.3556	8	5	2	2	1.4311	0.517124	61.182	3
	1616	Tb927.11.2500	Tb927.11.2500		carboxypeptidase, putative,metallo-peptidase, Clan MA(E) Family M32	57.683	62.8	0	271.7	1	1			0.0351175	0.684387	0.164698		61	23	23	1.10233	0.140555	10.74	55	58.1	24	24	0.927128	-0.10916	9.8107	47	48.7	20	20	1.0526	0.0739573	31.56	41
	4078	Tb927.9.8780	Tb927.9.8780		tRNA nucleotidyltransferase, putative	58.645	12.9	0	8.4412	1	1			0.0896002	0.688481	0.162108		12.9	6	6	1.38443	0.46929	20.974	6	12.9	6	6	0.974279	-0.0375931	11.483	6	4	2	2	0.89323	-0.162896	9.5319	2
	1969	Tb927.11.940	Tb927.11.940	KREPB5	KREPB5 (KREPB5)	43.464	5.8	0.0016112	2.6321	1	1		1	0.567087	0.689274	0.161608		3.1	1	1	3.10627	1.63518	NaN	1	2.6	1	1	0.706614	-0.501006	NaN	1	0	0	0	NaN		NaN	0
	1240	Tb927.11.10870	Tb927.11.10870	ERAP32	32 kDa ER-associated protein (ERAP32)	27.317	10.7	0	8.0133	1	1		1	-0.0412341	0.709137	0.14927		6.2	1	1	1.08176	0.11338	0.69474	2	10.7	2	2	0.860437	-0.216858	26.018	3	4.5	1	1	0.98608	-0.0202234	NaN	1
	1038	Tb927.10.7410	Tb927.10.7410		succinyl-CoA ligase [GDP-forming] beta-chain, putative	44.905	79	0	323.31	1	1		1	-0.0308268	0.711743	0.147677		78.5	31	31	0.889917	-0.168257	7.6657	159	75.9	29	29	1.05514	0.0774367	6.8756	160	64.7	26	26	0.99885	-0.00166007	9.8302	115
	1341	Tb927.11.12960	Tb927.11.12960		hypothetical protein, conserved	10.664	18.5	0.00028802	3.4953	1	1		1	-0.0900718	0.713709	0.146479		18.5	1	1	0.825491	-0.276675	NaN	1	0	0	0	NaN		NaN	0	18.5	1	1	1.0692	0.0965318	NaN	1
	2258	Tb927.3.3330	Tb927.3.3330		heat shock protein 20, putative	15.842	90.8	0	116.44	1	1			0.01399	0.727159	0.138371		90.8	14	14	1.00191	0.0027582	15.122	37	90.8	15	15	1.05646	0.0792341	9.4282	34	80.1	12	12	0.97264	-0.0400223	23.702	27
	771	Tb927.10.1660	Tb927.10.1660		hypothetical protein, conserved	33.212	3.4	0	3.7	1	1		1	0.725102	0.727492	0.138172		3.4	1	1	NaN		NaN	0	3.4	1	1	4.97364	2.3143	NaN	1	3.4	1	1	0.54939	-0.864097	NaN	1
	3569	Tb927.8.5420	Tb927.8.5420		hypothetical protein, conserved	46.375	10.4	0	7.4046	1	1			-0.0683732	0.731951	0.135518		4.8	2	2	0.858811	-0.219587	0.064762	2	8.2	3	3	0.832917	-0.263756	24.182	3	2.2	1	1	1.2127	0.278223	NaN	1
	3067	Tb927.7.1640	Tb927.7.1640	TbEAR	ras-like small GTPase, putative (TbEAR)	65.504	5.7	0	9.9598	1	1		1	0.100531	0.748635	0.12573		4.3	2	2	0.837451	-0.255924	34.307	3	5.7	3	3	0.945358	-0.081067	39.53	3	2.6	1	1	1.5568	0.638584	NaN	1
	4001	Tb927.9.6060	Tb927.9.6060		2Fe-2S iron-sulfur cluster binding domain containing protein, putative	30.49	44.3	0	38.81	1	1			-0.0313998	0.751718	0.123945		33.7	6	6	0.86783	-0.204516	25.414	9	39.6	7	7	1.04326	0.0611045	12.35	10	23.8	5	5	1.0347	0.0492126	7.8205	9
	2712	Tb927.5.3110	Tb927.5.3110		hypothetical protein, conserved	24.469	33.9	0	26.527	1	1		1	-0.163503	0.752785	0.123329		11.5	2	2	0.62901	-0.668845	21.64	2	26.6	3	3	0.677186	-0.562377	12.21	3	13.3	3	3	1.671	0.740712	36.89	4
	634	Tb927.10.13600	Tb927.10.13600		hypothetical protein, conserved,hypothetical protein	18.522	10.1	0	13.202	1	1		1	-0.459617	0.757292	0.120736		8.9	1	1	0.328461	-1.60621	NaN	1	0	0	0	NaN		NaN	0	10.1	1	1	1.6099	0.686971	10.311	2
	1739	Tb927.11.4690	Tb927.11.4690	POLIB	mitochondrial DNA polymerase I protein B (POLIB)	158.71	2.6	0.00057192	3.3962	1	1		1	0.0758017	0.759294	0.11959		1.4	2	2	0.923361	-0.115033	46.483	2	0.8	1	1	NaN		NaN	0	1.1	2	2	1.203	0.266637	NaN	1
	3278	Tb927.7.6200	Tb927.7.6200		chaperone protein DNAj, putative	31.594	8.8	0	5.1299	1	1		1	-0.0410712	0.75932	0.119575		4.9	1	1	0.972573	-0.040121	NaN	1	4.9	1	1	0.844167	-0.2444	NaN	1	8.8	2	2	1.1183	0.161307	6.9593	2
	3165	Tb927.7.3470	Tb927.7.3470		p22 protein precursor, putative	30.144	10	0	4.5487	1	1		1	0.237009	0.763551	0.117162		10	2	2	1.79691	0.845521	111.78	2	4.2	1	1	0.772977	-0.371503	NaN	1	0	0	0	NaN		NaN	0
	3938	Tb927.9.3410	Tb927.9.3410		unspecified product	13.824	12.7	0.0015781	2.4103	1	1			-0.154621	0.770014	0.113501		12.7	1	1	0.676498	-0.563841	15.508	3	12.7	1	1	1.193	0.254599	NaN	1	0	0	0	NaN		NaN	0
	2193	Tb927.3.2010	Tb927.3.2010		hypothetical protein, conserved	62.262	11.6	0	7.0883	1	1			-0.0529618	0.787135	0.103951		9.9	3	3	1.0423	0.0597656	17.969	3	4.2	2	2	1.12658	0.171953	21.494	2	4.5	2	2	0.76281	-0.390604	5.4505	2
	2925	Tb927.6.3510;Tb11.v5.0635	Tb927.6.3510		tRNA modification enzyme, putative	59.67	5.6	0	4.2312	2	1			-0.535135	0.800351	0.0967192		1.7	1	1	2.16586	1.11494	NaN	1	1.7	1	1	NaN		NaN	0	3.9	2	2	0.21988	-2.18521	NaN	1
	722	Tb927.10.1500	Tb927.10.1500	MetRS	methionyl-tRNA synthetase, putative (MetRS)	86.91	54.2	0	141.9	1	1		1	0.0375998	0.802477	0.0955673		50.5	27	27	1.23089	0.299702	21.259	44	42.6	24	24	0.954745	-0.0668125	15.443	36	31.2	18	18	0.92013	-0.12009	23.262	24
	468	Tb927.1.740	Tb927.1.740		hypothetical protein, conserved	48.865	14.3	0	14.461	1	1		1	-0.158366	0.80405	0.0947168		10.8	3	3	0.527872	-0.921741	8.559	3	14.3	4	4	0.713318	-0.487383	15.216	5	7.6	2	2	1.9106	0.934026	10.896	2
	3304	Tb927.7.680;Tb11.v5.0778	Tb927.7.680;Tb11.v5.0778		chaperone protein DNAj, putative;chaperone protein DNAj, putative	88.706	7.2	0	20.47	2	1		1	0.0603563	0.805454	0.093959		4.5	2	2	0.778755	-0.360758	4.6595	2	5.9	3	3	1.14397	0.194047	39.061	6	1.3	1	1	1.2726	0.347779	NaN	1
	3842	Tb927.9.1400	Tb927.9.1400		Monooxygenase, putative	51.432	5.5	0	4.1129	1	1		1	0.0694638	0.809434	0.0918186		0	0	0	NaN		NaN	0	3.7	1	1	0.897747	-0.15562	NaN	1	5.5	2	2	1.2265	0.294547	61.719	3
	3723	Tb927.9.10160	Tb927.9.10160		hypothetical protein, conserved	25.412	16	0	4.9373	1	1		1	-0.199072	0.812314	0.0902759		3.6	1	1	0.553006	-0.854634	NaN	1	0	0	0	NaN		NaN	0	12.4	3	3	1.3722	0.456491	9.4201	3
	1540	Tb927.11.16530	Tb927.11.16530		hypothetical protein, conserved	117.5	6.5	0	6.7708	1	1		1	-0.141971	0.821187	0.0855579		4.1	2	2	0.632871	-0.660016	NaN	1	1.9	2	2	0.603755	-0.727964	26.444	2	1.7	1	1	1.9481	0.962068	NaN	1
	1140	Tb927.10.9190	Tb927.10.9190	IleRS	isoleucyl-tRNA synthetase, putative (IleRS)	130.6	46.5	0	178.2	1	1			0.0288997	0.823419	0.0843793		42.7	34	34	1.13419	0.181657	26.341	55	33.2	27	27	1.07095	0.0988918	23.736	48	27.3	23	23	0.87427	-0.193849	45.087	29
	3818	Tb927.9.13040	Tb927.9.13040		hypothetical protein, conserved	46.219	17.3	0	31.472	1	1		1	-0.0329018	0.830353	0.0807371		9.2	2	2	1.11838	0.161411	48.15	2	13.7	3	3	0.816326	-0.292782	48.054	3	8.9	2	2	1.0229	0.0326651	35.954	2
	3326	Tb927.7.7230	Tb927.7.7230	NTR	nitroreductase (NTR)	35.522	28.4	0	11.044	1	1		1	0.055707	0.831767	0.0799981		23.8	4	4	0.861697	-0.214747	16.878	5	14.1	2	2	0.91191	-0.133037	15.776	4	9.1	2	2	1.4289	0.514905	31.215	3
	438	Tb927.1.3950	Tb927.1.3950	ALAT	alanine aminotransferase (ALAT)	55.704	65.1	0	206.13	1	1			-0.0493104	0.838532	0.0764806		44.2	14	14	0.807754	-0.308011	12.029	28	61.1	21	21	1.29539	0.373383	13.085	42	44.6	17	17	0.86256	-0.213303	18.074	24
	2702	Tb927.5.2890	Tb927.5.2890		hypothetical protein, conserved	236.85	4.3	0	10.288	1	1			-0.0484011	0.841903	0.0747378		4	7	7	1.22402	0.291627	39.906	8	2.6	5	5	1.00417	0.00599968	2.4807	6	0.7	1	1	0.73569	-0.44283	NaN	1
	1958	Tb927.11.9140	Tb927.11.9140	MRB0880	mitochondrial RNA binding complex 1 subunit (MRB0880)	18.647	12.6	0	9.8894	1	1		1	0.152653	0.844222	0.0735431		8	1	1	0.727643	-0.458697	NaN	1	4.6	1	1	1.6982	0.764003	NaN	1	0	0	0	NaN		NaN	0
	3886	Tb927.9.1590	Tb927.9.1590		hypothetical protein, conserved	15.734	40.7	0	11.258	1	1			-0.0835014	0.847213	0.0720073		40.7	4	4	0.691515	-0.532167	16.405	5	26.4	3	3	0.760746	-0.394514	0.71511	4	23.6	2	2	1.5979	0.676177	NaN	1
	3255	Tb927.7.5630	Tb927.7.5630		hypothetical protein, conserved	73.156	5.4	0	3.7025	1	1		1	-0.109021	0.857169	0.0669338		1.4	1	1	1.94035	0.95632	NaN	1	2.4	1	1	0.672721	-0.571919	NaN	1	4.1	2	2	0.6107	-0.711464	72.193	2
	849	Tb927.10.2960	Tb927.10.2960		GTP-binding protein, putative,elongation factor, putative	84.105	4.3	0	4.2681	1	1		1	0.253689	0.860831	0.0650822		0	0	0	NaN		NaN	0	2.7	1	1	2.63102	1.39562	NaN	1	1.6	1	1	0.54027	-0.888248	NaN	1
	596	Tb927.10.12840	Tb927.10.12840	MCP12	mitochondrial carrier protein (MCP12)	33.131	49.3	0	173.48	1	1	1		-0.0136792	0.870853	0.0600552		49.3	16	16	0.907359	-0.140255	7.7213	58	49.3	17	17	1.08442	0.116927	7.192	63	38.2	13	13	0.9878	-0.0177091	10.622	42
	2935	Tb927.6.3680	Tb927.6.3680		hypothetical protein, conserved	27.875	18.7	0	54.409	1	1			0.0039264	0.872278	0.0593452		15	4	4	0.981547	-0.0268709	12.476	8	18.7	5	5	1.03201	0.0454612	7.0193	13	18.3	5	5	0.99529	-0.00681109	23.954	6
	2523	Tb927.4.3690	Tb927.4.3690		hypothetical protein, conserved	48.527	10.7	0	16.17	1	1		1	-0.0245049	0.877169	0.0569169		10.7	2	2	0.89222	-0.164529	2.0454	2	10.7	2	2	1.19374	0.255494	42.07	2	10.7	2	2	0.89225	-0.16448	22.917	2
	3934	Tb927.9.3350	Tb927.9.3350		pseudouridylate synthase, putative	46.294	5.9	0	4.7896	1	1		1	0.0999535	0.884859	0.0531258		2.2	1	1	1.50403	0.588834	NaN	1	2.2	1	1	1.76916	0.823064	NaN	1	3.7	1	1	0.46264	-1.11204	NaN	1
	2863	Tb927.6.2200	Tb927.6.2200		hypothetical protein, conserved	21.126	68.5	0	58.044	1	1			0.039255	0.897162	0.0471294		56.3	8	8	1.44304	0.529114	19.291	10	52.8	6	6	0.989511	-0.0152121	17.118	9	49.7	6	6	0.75989	-0.396137	7.1299	10
	1076	Tb927.10.8020	Tb927.10.8020	POP	prolyl oligopeptidase, putative,serine peptidase clan SC, family S9A, putative (POP)	77.624	66.6	0	323.31	1	1		1	-0.0168591	0.906355	0.0427015		64.2	39	39	1.14929	0.200747	17.892	72	61.6	37	37	0.990982	-0.0130691	18.396	67	51.3	28	28	0.84777	-0.238255	11.985	50
	481	Tb927.10.10120	Tb927.10.10120		hypothetical protein, conserved	63.236	14.1	0	7.9749	1	1		1	-0.12473	0.909598	0.0411507		14.1	5	5	0.435085	-1.20063	32.69	5	8.2	3	3	0.504108	-0.988194	38.537	3	1.9	1	1	3.5177	1.81463	NaN	1
	2546	Tb927.4.4320	Tb927.4.4320		divalent cation tolerance protein, putative	12.973	12.9	0	5.2367	1	1			-0.00737196	0.911936	0.0400354		12.9	1	1	0.959049	-0.0603242	NaN	1	12.9	1	1	1.0321	0.0455802	NaN	1	0	0	0	NaN		NaN	0
	2147	Tb927.3.1100	Tb927.3.1100		hypothetical protein, conserved	44.793	16.6	0.00056306	3.1901	1	1		1	-0.117029	0.916461	0.0378859		14.4	3	3	0.498703	-1.00375	42.813	2	0	0	0	NaN		NaN	0	2.3	1	1	1.7049	0.769687	NaN	1
	3458	Tb927.8.3070	Tb927.8.3070		hypothetical protein, conserved	17.047	6.2	0.0025907	2.1781	1	1		1	-0.0142366	0.948261	0.0230723		6.2	1	1	0.905715	-0.142871	NaN	1	6.2	1	1	1.29026	0.367657	NaN	1	6.2	1	1	0.83076	-0.267496	NaN	1
	3742	Tb927.9.10630	Tb927.9.10630		hypothetical protein, conserved	28.977	16.2	0.0013591	2.7825	1	1		1	-0.056468	0.948338	0.023037		0	0	0	NaN		NaN	0	16.2	3	3	0.594283	-0.750778	59.752	3	2.6	1	1	1.556	0.637842	NaN	1
	670	Tb927.10.14170	Tb927.10.14170	AQP2	Aquaporin 2	33.593	8.7	0	38.968	1	1			-0.00696206	0.955503	0.0197679		8.7	2	2	0.856311	-0.223793	15.347	3	8.7	2	2	1.04552	0.0642234	6.5111	3	6.4	1	1	1.1009	0.138683	21.697	2
	3167	Tb927.7.3510	Tb927.7.3510		hypothetical protein, conserved	56.445	2.5	0	3.7856	1	1		1	0.0774903	0.961374	0.0171075		2.5	1	1	0.435844	-1.19812	NaN	1	0	0	0	NaN		NaN	0	2.5	1	1	2.5546	1.3531	NaN	1
	1375	Tb927.11.13620	Tb927.11.13620		hypothetical protein, conserved	15.326	18.2	0.0015983	2.5582	1	1		1	-0.00673173	0.982881	0.00749905		0	0	0	NaN		NaN	0	18.2	2	2	0.83682	-0.257011	19.572	2	18.2	2	2	1.1839	0.243547	75.535	2
	2307	Tb927.3.4380	Tb927.3.4380		Tob55, putative	53.558	14.8	0	25.465	1	1			-0.000543368	0.997747	0.000979652		12.3	4	4	1.18468	0.244497	62.922	4	12.3	4	4	1.05875	0.082362	20.105	4	7.1	3	3	0.79637	-0.328489	38.704	3
	2350	Tb927.3.5300	Tb927.3.5300		hypothetical protein, conserved	20.578	7.6	0.003354	2.125	1	1		1	NaN				0	0	0	NaN		NaN	0	0	0	0	NaN		NaN	0	7.6	1	1	NaN		NaN	0
	2584	Tb927.4.5170	Tb927.4.5170		ribosomal protein L7/L12, putative	17.255	14.4	0.0020893	2.304	1	1			NaN				7.8	1	1	NaN		NaN	0	7.8	1	1	NaN		NaN	0	6.6	1	1	NaN		NaN	0
	3092	Tb927.7.2220	Tb927.7.2220		hypothetical protein, conserved	74.361	1.8	0.0018402	2.4064	1	1		1	NaN				1.8	1	1	NaN		NaN	0	1.8	1	1	NaN		NaN	0	0	0	0	NaN		NaN	0
	3226	Tb927.7.4800	Tb927.7.4800		hypothetical protein, conserved	12.152	8.7	0	4.1867	1	1		1	NaN				0	0	0	NaN		NaN	0	0	0	0	NaN		NaN	0	8.7	1	1	NaN		NaN	0
	3551	Tb927.8.5150	Tb927.8.5150		hypothetical protein, conserved	11.354	8.4	0.0023346	2.2106	1	1			NaN				0	0	0	NaN		NaN	0	0	0	0	NaN		NaN	0	8.4	1	1	NaN		NaN	0
	2005	Tb927.11.9900	Tb927.11.9900		phytoene synthase, putative	61.763	2.2	0.004572	1.9188	1	1		1	1.01371				0	0	0	NaN		NaN	0	0	0	0	NaN		NaN	0	2.2	1	1	2.0191	1.01371	NaN	1
	3031	Tb927.6.920	Tb927.6.920		helicase, putative	107.47	2.7	0	6.3737	1	1		1	0.813119				0	0	0	NaN		NaN	0	2.7	2	2	1.75701	0.813119	NaN	1	0	0	0	NaN		NaN	0
	2026	Tb927.2.2140	Tb927.2.2140		hypothetical protein, conserved	12.703	12	0	5.4342	1	1			0.382391				0	0	0	NaN		NaN	0	0	0	0	NaN		NaN	0	12	1	1	1.3035	0.382391	NaN	1
	1743	Tb927.11.480	Tb927.11.480		hypothetical protein, conserved	43.657	2.9	0	3.7348	1	1		1	0.346334				0	0	0	NaN		NaN	0	2.9	1	1	1.27133	0.346335	NaN	1	0	0	0	NaN		NaN	0
	3369	Tb927.8.1310	Tb927.8.1310	MCP15	mitochondrial carrier protein,adenine nucleotide mitochondrial translocator, putative (MCP15)	36.85	3.9	0.00055371	2.9895	1	1	1		0.332622				0	0	0	NaN		NaN	0	0	0	0	NaN		NaN	0	3.9	1	1	1.2593	0.332622	NaN	1
	810	Tb927.10.2300	Tb927.10.2300		hypothetical protein, conserved	21.425	7.8	0.0033436	2.0885	1	1			0.168129				0	0	0	NaN		NaN	0	0	0	0	NaN		NaN	0	7.8	1	1	1.1236	0.168129	NaN	1
	1470	Tb927.11.15360	Tb927.11.15360		hypothetical protein, conserved	14.57	12.2	0.0057891	1.7807	1	1			0.163753				0	0	0	NaN		NaN	0	12.2	1	1	1.1202	0.163753	NaN	1	0	0	0	NaN		NaN	0
	3013	Tb927.6.5140	Tb927.6.5140		ribosomal P protein AGP2beta-1, putative	24.983	9.1	0	4.4198	1	1			0.145813				0	0	0	NaN		NaN	0	9.1	1	1	1.10635	0.145813	NaN	1	0	0	0	NaN		NaN	0
	1209	Tb927.11.10390	Tb927.11.10390		hypothetical protein, conserved	86.03	3	0.0050659	1.8772	1	1			0.135586				3	1	1	1.09854	0.135586	NaN	1	0	0	0	NaN		NaN	0	0	0	0	NaN		NaN	0
	3142	Tb927.7.3140	Tb927.7.3140		hypothetical protein, conserved	20.963	12.9	0.0013717	2.8779	1	1			0.0949116				5.9	1	1	NaN		NaN	0	5.9	1	1	NaN		NaN	0	7	1	1	1.068	0.0949116	NaN	1
	3878	Tb927.9.1530	Tb927.9.1530		hypothetical protein, conserved	81.612	1.2	0.0040931	2.0263	1	1		1	0.0638766				1.2	1	1	1.04527	0.0638766	NaN	1	0	0	0	NaN		NaN	0	0	0	0	NaN		NaN	0
	4074	Tb927.9.8710	Tb927.9.8710		hypothetical protein, conserved	19.729	7.1	0.00055294	2.9832	1	1		1	-0.0472592				0	0	0	NaN		NaN	0	7.1	1	1	0.967773	-0.0472592	NaN	1	0	0	0	NaN		NaN	0
	3646	Tb927.8.6790	Tb927.8.6790		hypothetical protein, conserved	160.41	0.6	0.0096511	1.5877	1	1			-0.0764323				0	0	0	NaN		NaN	0	0	0	0	NaN		NaN	0	0.6	1	1	0.9484	-0.0764323	NaN	1
	1648	Tb927.11.2990	Tb927.11.2990	KREPB4	KREPB4 (KREPB4)	46.39	4.8	0	4.214	1	1		1	-0.199769				0	0	0	NaN		NaN	0	0	0	0	NaN		NaN	0	4.8	2	2	0.87069	-0.199769	9.5189	2
	3495	Tb927.8.4000	Tb927.8.4000		hypothetical protein, conserved	71.405	5.2	0.0045825	1.9496	1	1		1	-0.20389				5.2	2	2	0.868206	-0.20389	38.403	2	0	0	0	NaN		NaN	0	0	0	0	NaN		NaN	0
	3444	Tb927.8.2720	Tb927.8.2720		hypothetical protein, conserved	45.091	2.7	0.0015907	2.5065	1	1			-0.226509				2.7	1	1	NaN		NaN	0	2.7	1	1	0.854701	-0.226509	NaN	1	0	0	0	NaN		NaN	0
	2476	Tb927.4.2580	Tb927.4.2580		hypothetical protein, conserved	112.82	0.9	0.00055279	2.9788	1	1		1	-0.280142				0	0	0	NaN		NaN	0	0	0	0	NaN		NaN	0	0.9	1	1	0.82351	-0.280142	NaN	1
	3347	Tb927.7.890	Tb927.7.890		electron transfer protein, putative	19.713	4.5	0.0060226	1.7498	1	1		1	-0.303882				0	0	0	NaN		NaN	0	0	0	0	NaN		NaN	0	4.5	1	1	0.81007	-0.303882	NaN	1
	4011	Tb927.9.6410	Tb927.9.6410		hypothetical protein, conserved	75.105	2.8	0	3.9898	1	1		1	-0.330099				2.8	1	1	0.795482	-0.330099	NaN	1	0	0	0	NaN		NaN	0	0	0	0	NaN		NaN	0
	2272	Tb927.3.3570	Tb927.3.3570		hypothetical protein, conserved	18.439	7.4	0.0045883	1.9652	1	1			-0.354354				0	0	0	NaN		NaN	0	0	0	0	NaN		NaN	0	7.4	1	1	0.78222	-0.354354	NaN	1
	2761	Tb927.5.4080	Tb927.5.4080		hypothetical protein, conserved	58.167	4.9	0	13.359	1	1		1	-0.358396				2.3	1	1	NaN		NaN	0	4.9	2	2	0.780031	-0.358396	NaN	1	0	0	0	NaN		NaN	0
	300	Tb927.11.15470;Tb11.v5.0544	Tb927.11.15470;Tb11.v5.0544		methionyl-tRNA formyltransferase;methionyl-tRNA formyltransferase, putative	71.337	4.6	0	4.0385	2	1		1	-0.396488				0	0	0	NaN		NaN	0	4.6	2	2	0.759705	-0.396488	32.673	2	0	0	0	NaN		NaN	0
	1749	Tb927.11.4870	Tb927.11.4870		hypothetical protein, conserved	25.784	8.6	0	3.9014	1	1		1	-0.401425				0	0	0	NaN		NaN	0	0	0	0	NaN		NaN	0	8.6	1	1	0.75711	-0.401425	NaN	1
	2819	Tb927.6.1450	Tb927.6.1450		hypothetical protein, conserved	31.393	3.2	0.0035888	2.058	1	1		1	-0.416407				0	0	0	NaN		NaN	0	3.2	1	1	0.749288	-0.416407	NaN	1	0	0	0	NaN		NaN	0
	1532	Tb927.11.16420	Tb927.11.16420		hypothetical protein, conserved	33.387	4	0.0015957	2.5442	1	1		1	-0.495286				0	0	0	NaN		NaN	0	4	1	1	0.709421	-0.495286	NaN	1	0	0	0	NaN		NaN	0
	1805	Tb927.11.5990	Tb927.11.5990		hypothetical protein, conserved	69.307	8.6	0	7.457	1	1		1	-0.521453				3.4	1	1	NaN		NaN	0	5.2	2	2	0.69667	-0.521453	46.348	2	0	0	0	NaN		NaN	0
	3462	Tb927.8.3170	Tb927.8.3170		hypothetical protein, conserved	90.466	3.5	0.0098522	1.52	1	1		1	-0.577248				0	0	0	NaN		NaN	0	3.5	2	2	0.670241	-0.577248	30.627	2	0	0	0	NaN		NaN	0
	2303	Tb927.3.4240	Tb927.3.4240		thioredoxin, putative	21.78	10.5	0.00028918	3.5904	1	1		1	-0.601234				0	0	0	NaN		NaN	0	0	0	0	NaN		NaN	0	10.5	2	2	0.65919	-0.601234	30.182	2
	4038	Tb927.9.7210	Tb927.9.7210		mitochondrial exoribonuclease DSS-1	83.345	1.3	0.0045639	1.8934	1	1		1	-0.611833				1.3	1	1	NaN		NaN	0	1.3	1	1	0.654365	-0.611833	NaN	1	0	0	0	NaN		NaN	0
	2989	Tb927.6.4700	Tb927.6.4700		hypothetical protein, conserved	37.792	7.7	0	5.1793	1	1			-0.709291				0	0	0	NaN		NaN	0	7.7	2	2	0.611621	-0.709291	20.59	2	0	0	0	NaN		NaN	0
	1306	Tb927.11.12200	Tb927.11.12200		hypothetical protein, conserved	10.796	28.3	0.0021008	2.3861	1	1		1	-0.710349				0	0	0	NaN		NaN	0	28.3	2	2	0.611172	-0.710349	29.866	2	0	0	0	NaN		NaN	0
	1594	Tb927.11.2160	Tb927.11.2160		hypothetical protein, conserved	18.056	6.5	0.0020844	2.2858	1	1		1	-0.711583				6.5	1	1	0.61065	-0.711583	NaN	1	0	0	0	NaN		NaN	0	0	0	0	NaN		NaN	0
	2417	Tb927.4.1440	Tb927.4.1440		hypothetical protein, conserved	23.261	10.7	0.0081927	1.6259	1	1		1	-0.71264				0	0	0	NaN		NaN	0	10.7	1	1	0.610203	-0.71264	NaN	1	0	0	0	NaN		NaN	0
	1021	Tb927.10.7080	Tb927.10.7080		ATP-dependent DEAD/H RNA helicase, putative,RNA helicase, putative	62.116	5.1	0	4.5178	1	1			-0.731531				0	0	0	NaN		NaN	0	5.1	2	2	0.602265	-0.731531	NaN	1	0	0	0	NaN		NaN	0
	3888	Tb927.9.1650	Tb927.9.1650		hypothetical protein, conserved	40.422	5.5	0	5.6478	1	1		1	-0.763582				0	0	0	NaN		NaN	0	5.5	1	1	0.589032	-0.763582	NaN	1	0	0	0	NaN		NaN	0
	332	Tb927.9.15380;Tb11.v5.0686	Tb927.9.15380;Tb11.v5.0686		NADH-ubiquinone oxidoreductase complex I subunit, putative;hypothetical protein, conserved	42.585	5.4	0	10.867	2	1		1	-0.800827				5.4	1	1	0.57402	-0.800827	NaN	1	0	0	0	NaN		NaN	0	0	0	0	NaN		NaN	0
	3273	Tb927.7.5950	Tb927.7.5950	PAD3	protein associated with differentiation 3, putative	65.344	16.6	0	23.319	1	1			-0.82073				15.1	8	1	0.566155	-0.82073	NaN	1	13.2	8	0	NaN		NaN	0	13.1	8	0	NaN		NaN	0
	3154	Tb927.7.3340	Tb927.7.3340		hypothetical protein, conserved	58.619	6.5	0	7.3313	1	1			-0.834145				1.8	1	1	0.560915	-0.834145	26.869	2	4.7	1	1	NaN		NaN	0	0	0	0	NaN		NaN	0
	130	Tb04.24M18.150	Tb04.24M18.150		hypothetical protein, conserved	18.061	46.3	0.006261	1.7256	1	1		1	-0.848478				21	3	0	NaN		NaN	0	30.9	3	1	0.55537	-0.848478	NaN	1	0	0	0	NaN		NaN	0
	1497	Tb927.11.15820	Tb927.11.15820		superoxide dismutase, putative	36.047	6.8	0	6.2071	1	1		1	-0.919588				0	0	0	NaN		NaN	0	0	0	0	NaN		NaN	0	6.8	1	1	0.52866	-0.919588	17.565	2
	2386	Tb927.3.820	Tb927.3.820		hypothetical protein, conserved	22.174	17.6	0.0013602	2.7973	1	1		1	-1.02295				6.4	1	1	NaN		NaN	0	6.4	1	1	NaN		NaN	0	17.6	2	2	0.49211	-1.02295	NaN	1
	2921	Tb927.6.3420	Tb927.6.3420		hypothetical protein, conserved	39.505	7.4	0.00055386	2.9917	1	1		1	-1.11998				0	0	0	NaN		NaN	0	0	0	0	NaN		NaN	0	7.4	2	2	0.4601	-1.11998	NaN	1
	1712	Tb927.11.4140	Tb927.11.4140		hypothetical protein, conserved	24.007	10.8	0	25.742	1	1		1	-1.15173				0	0	0	NaN		NaN	0	10.8	1	1	0.450086	-1.15173	NaN	1	0	0	0	NaN		NaN	0
	3539	Tb927.8.4920	Tb927.8.4920		hypothetical protein, conserved	58.293	5.2	0.001619	2.6744	1	1		1	-1.21064				0	0	0	NaN		NaN	0	5.2	2	2	0.432077	-1.21064	40.754	2	0	0	0	NaN		NaN	0
	648	Tb927.10.13810	Tb927.10.13810		hypothetical protein, conserved	12.955	15.9	0.0020871	2.2989	1	1		1	-1.31139				15.9	1	1	0.402933	-1.31139	NaN	1	0	0	0	NaN		NaN	0	0	0	0	NaN		NaN	0
	2682	Tb927.5.2420	Tb927.5.2420		hypothetical protein, conserved	102.77	1.3	0.0096535	1.5878	1	1			-1.33165				1.3	1	1	0.397314	-1.33165	NaN	1	0	0	0	NaN		NaN	0	0	0	0	NaN		NaN	0
	1709	Tb927.11.4020	Tb927.11.4020		hypothetical protein, conserved	19.159	6.1	0.0015886	2.4848	1	1		1	-1.54251				6.1	1	1	0.343289	-1.54251	NaN	1	0	0	0	NaN		NaN	0	0	0	0	NaN		NaN	0
	2816	Tb927.6.1410	Tb927.6.1410		hypothetical protein, conserved	27.154	14	0	3.901	1	1		1	-1.67084				0	0	0	NaN		NaN	0	14	3	3	0.31407	-1.67084	16.031	2	4.4	1	1	NaN		NaN	0
	2007	Tb927.11.9930	Tb927.11.9930		NADH-ubiquinone oxidoreductase complex I subunit, putative	30.327	7.4	0	4.1498	1	1			-1.96794				0	0	0	NaN		NaN	0	7.4	1	1	0.255617	-1.96794	NaN	1	0	0	0	NaN		NaN	0
	414	Tb927.1.2880;Tb927.1.2850;Tb927.1.2820	Tb927.1.2880;Tb927.1.2850;Tb927.1.2820		pteridine transporter, putative;pteridine transporter, putative;pteridine transporter, putative	70.809	4.6	0.00056738	3.2731	3	1			-3.50881				1.5	1	0	NaN		NaN	0	4.6	3	2	0.0878503	-3.50881	3.9531	2	0	0	0	NaN		NaN	0
	1852	Tb927.11.6680	Tb927.11.6680		amino acid permease/transporter, putative	56.062	5.5	0	7.2824	1				-0.959554	0.0244092	1.61245	+	5.5	2	2	0.50888	-0.974603	13.435	3	5.5	2	2	0.430404	-1.21624	14.4	4	5.5	2	2	0.62079	-0.687823	60.193	4
	676	Tb927.10.14250	Tb927.10.14250		hypothetical protein, conserved	33.358	5.5	0.00057225	3.3964	1				-0.918751	0.0205254	1.68771	+	5.5	1	1	0.587855	-0.766468	41.789	3	5.5	1	1	0.439754	-1.18523	6.9112	2	5.5	1	1	0.57254	-0.804552	7.715	2
	3446	Tb927.8.2760	Tb927.8.2760		hypothetical protein, conserved	52.159	5.5	0.00055741	3.0331	1			1	-0.898756	0.0387265	1.41199	+	5.5	1	1	0.455498	-1.13448	NaN	1	5.5	1	1	0.492587	-1.02155	NaN	1	5.5	1	1	0.68766	-0.540233	NaN	1
	2714	Tb927.5.3140	Tb927.5.3140		hypothetical protein, conserved	25.738	13	0	16.305	1			1	-0.859456	0.0249876	1.60228	+	13	2	2	0.564207	-0.825704	36.161	2	9.3	1	1	0.538416	-0.893207	NaN	1	0	0	0	NaN		NaN	0
	1896	Tb927.11.7600	Tb927.11.7600		hypothetical protein, conserved	29.317	33.3	0	27.356	1				-0.843621	0.0403591	1.39406	+	33.3	7	7	0.59453	-0.750178	44.285	11	18	4	4	0.440703	-1.18212	8.3287	5	33.3	7	7	0.66041	-0.598566	27.805	9
	487	Tb927.10.1030	Tb927.10.1030	CBP1	serine carboxypeptidase III precursor, putative,serine peptidase, Clan SC, Family S10 (CBP1)	51.079	23.3	0	30.016	1				-0.822828	0.00649934	2.18713	+	23.3	6	1	0.568634	-0.814427	4.8128	4	23.3	6	1	0.56205	-0.831229	11.936	4	10.1	3	0	NaN		NaN	0
	746	Tb927.10.15440	Tb927.10.15440		hypothetical protein, conserved	32.727	14.7	0	5.6988	1				-0.811526	0.0477004	1.32148	+	6.3	1	1	0.594354	-0.750607	NaN	1	0	0	0	NaN		NaN	0	8.4	2	2	0.54622	-0.872446	NaN	1
	883	Tb927.10.3610	Tb927.10.3610		hypothetical protein, conserved	53.984	5.6	0	8.4866	1			1	-0.763025	0.0244047	1.61253	+	5.6	1	1	0.529129	-0.91831	NaN	1	5.6	1	1	0.695604	-0.523662	NaN	1	5.6	1	1	0.5559	-0.847103	NaN	1
	3876	Tb927.9.15270	Tb927.9.15270		hypothetical protein, conserved	65.909	7.4	0	5.6953	1				-0.751496	0.0260927	1.58348	+	2.6	1	1	0.597193	-0.74373	16.715	2	7.4	3	3	0.510595	-0.969749	29.886	3	2.6	1	1	0.68729	-0.541009	NaN	1
	3529	Tb927.8.4690	Tb927.8.4690		hypothetical protein, conserved	13.31	32.3	0	5.8039	1				-0.727367	0.00162563	2.78898	+	23.4	2	2	0.6222	-0.68455	24.097	4	32.3	3	3	0.580922	-0.783582	32.407	8	22.6	2	2	0.60964	-0.713971	13.185	3
	2560	Tb927.4.4610	Tb927.4.4610		hypothetical protein, conserved	34.626	13.5	0	7.0848	1			1	-0.707142	0.0151535	1.81949	+	5.6	1	1	0.685401	-0.54498	NaN	1	7.8	1	1	0.603427	-0.728748	NaN	1	5.6	1	1	0.55567	-0.8477	NaN	1
	3179	Tb927.7.3760	Tb927.7.3760		phosphatidylserine synthase, putative	57.595	1.8	0.0060196	1.7452	1				-0.696492	0.0139528	1.85534	+	1.8	1	1	0.610575	-0.711759	31.507	2	1.8	1	1	0.623636	-0.681224	NaN	1	0	0	0	NaN		NaN	0
	1840	Tb927.11.6490	Tb927.11.6490		hypothetical protein, conserved	28.411	36.2	0	37.084	1			1	-0.631115	0.0446	1.35067	+	28	4	4	0.569022	-0.813443	9.5795	3	32.1	5	5	0.778816	-0.360645	21.464	8	13.6	3	3	0.60741	-0.719257	18.033	3
	548	Tb927.10.11840;Tb927.10.11850	Tb927.10.11840;Tb927.10.11850		hypothetical protein;hypothetical protein, conserved	50.308	4.9	0	5.3459	2				-0.613438	0.0396312	1.40196	+	2.2	1	1	0.5997	-0.737687	NaN	1	2.2	1	1	0.598337	-0.740971	42.476	2	4.9	2	2	0.77827	-0.361657	33.563	5
	493	Tb927.10.1040;Tb11.v5.0638;Tb927.10.1050	Tb927.10.1040;Tb11.v5.0638;Tb927.10.1050	CBP1	serine carboxypeptidase III precursor, putative,serine carboxypeptidase (CBP1) precursor, putative,serine peptidase, Clan SC, Family S10 (CBP1);serine carboxypeptidase III precursor, putative (CBP1);serine carboxypeptidase III precursor, putative,serine	51.509	28.9	0	91.398	3				-0.611721	0.0321316	1.49307	+	28.9	8	3	0.61565	-0.699818	8.7951	7	28.9	8	3	0.595948	-0.746743	15.545	7	20.3	6	3	0.76387	-0.388601	31.906	5
	1893	Tb927.11.7540	Tb927.11.7540		electron-transfer-flavoprotein, alpha polypeptide, putative	33.861	40.4	0	64.245	1				-0.608665	0.0164602	1.78356	+	23.5	5	5	0.614742	-0.701948	16.126	7	25.9	6	6	0.731315	-0.451435	16.121	9	21.3	4	4	0.62737	-0.672612	16.597	4
	3580	Tb927.8.5610	Tb927.8.5610		hypothetical protein, conserved	54.81	1.8	0.0033531	2.1239	1				-0.581171	0.0321861	1.49233	+	1.8	1	1	0.77226	-0.372841	2.9132	2	1.8	1	1	0.604303	-0.726657	30.87	2	1.8	1	1	0.63993	-0.644014	NaN	1
	464	Tb927.1.690	Tb927.1.690		hypothetical protein, conserved	27.397	12.8	0	5.1954	1				-0.573511	0.0302218	1.51968	+	7	1	1	0.772857	-0.371726	NaN	1	12.8	2	2	0.638121	-0.648097	34.858	2	7	1	1	0.61527	-0.700708	NaN	1
	3461	Tb927.8.3160	Tb927.8.3160		hypothetical protein, conserved	18.646	10	0.00028977	3.6408	1			1	-0.566937	0.00940412	2.02668	+	10	1	1	0.671141	-0.575312	NaN	1	10	1	1	0.678979	-0.558562	NaN	1	0	0	0	NaN		NaN	0
	3669	Tb927.8.7120	Tb927.8.7120		squalene synthase, putative	51.478	43.9	0	96.536	1				-0.524817	0.00138204	2.85948	+	36	14	14	0.709774	-0.494569	20.872	21	38.2	14	14	0.69808	-0.518535	33.441	20	34	14	14	0.67767	-0.561345	31.687	20
	4009	Tb927.9.6350	Tb927.9.6350	IMPase	inositol-1(or 4)-monophosphatase, putative (IMPase)	39.976	3	0.0077038	1.64	1				-0.511678	0.00637303	2.19565	+	3	1	1	0.672631	-0.572114	NaN	1	3	1	1	0.692761	-0.529571	NaN	1	3	1	1	0.74054	-0.43335	NaN	1
	2002	Tb927.11.9870	Tb927.11.9870		hypothetical protein, conserved	44.629	13	0	8.5695	1				-0.509219	0.0437077	1.35944	+	8.8	2	2	0.746157	-0.422448	17.766	3	2.8	1	1	0.603792	-0.727877	NaN	1	4.2	1	1	0.76986	-0.377332	NaN	1
	500	Tb927.10.10630	Tb927.10.10630		hypothetical protein, conserved	29.655	10.4	0.00056227	3.1546	1				-0.495916	0.025529	1.59297	+	10.4	2	2	0.699399	-0.515813	27.199	3	4.6	1	1	0.718959	-0.476019	NaN	1	0	0	0	NaN		NaN	0
	3356	Tb927.8.1010	Tb927.8.1010		chaperone protein DNAj, putative	55.325	10	0	9.5623	1			1	-0.492628	0.00322176	2.49191	+	7.1	2	2	0.689227	-0.536948	16.457	3	6.9	2	2	0.736757	-0.44074	17.793	3	4.1	1	1	0.70701	-0.500198	NaN	1
	2885	Tb927.6.2630	Tb927.6.2630		hypothetical protein, conserved	48.676	10.9	0	8.0917	1				-0.491651	0.0111014	1.95462	+	7.1	2	2	0.70373	-0.506907	26.825	3	10.9	3	3	0.760746	-0.394514	22.457	4	4.6	1	1	0.67197	-0.573531	9.7453	3
	3565	Tb927.8.5370	Tb927.8.5370		hypothetical protein, conserved	51.062	17	0	8.0052	1				-0.478041	0.00734543	2.13398	+	3.3	1	1	0.68686	-0.541911	25.516	2	12.2	2	2	0.71144	-0.491186	11.611	3	8.1	3	3	0.75732	-0.401025	15.191	2
	967	Tb927.10.5820	Tb927.10.5820		predicted RanGDP binding protein	109.23	12	0	10.717	1			1	-0.477395	0.00611385	2.21368	+	11	6	6	0.704473	-0.505383	17.641	6	7	4	4	0.695604	-0.523662	14.916	6	3.7	3	3	0.75621	-0.403141	15.303	3
	1203	Tb927.11.1030	Tb927.11.1030	kkt7	hypothetical protein, conserved	70.953	6.5	0	9.4554	1				-0.477154	0.023246	1.63365	+	2.8	1	1	0.648382	-0.625083	5.0934	2	2.8	1	1	0.753012	-0.409255	NaN	1	6.5	3	3	0.75937	-0.397125	23.499	2
	2176	Tb927.3.1720	Tb927.3.1720		hypothetical protein, conserved	11.172	35.1	0	8.2443	1				-0.473122	0.00165644	2.78083	+	24.5	2	2	0.716743	-0.480472	6.8288	4	35.1	3	3	0.706015	-0.502229	9.1827	4	35.1	3	3	0.73884	-0.436666	33.959	3
	293	Tb927.8.3320;Tb11.v5.0519	Tb927.8.3320;Tb11.v5.0519		hypothetical protein, conserved;hypothetical protein, conserved	45.866	12.2	0	17.697	2			1	-0.470163	0.00700695	2.15447	+	6	2	2	0.683995	-0.547943	33.443	2	12.2	3	3	0.748111	-0.418676	12.643	4	8.5	2	2	0.73516	-0.44387	43.468	3
	2296	Tb927.3.4120	Tb927.3.4120		hypothetical protein, conserved	73.301	11.8	0	12.35	1				-0.468434	0.0376324	1.42444	+	5.2	1	1	0.643418	-0.636172	NaN	1	8.1	2	2	0.728863	-0.45628	1.8198	2	3.7	1	1	0.80505	-0.31285	NaN	1
	4028	Tb927.9.7020	Tb927.9.7020		hypothetical protein, conserved	24.783	14.2	0	3.7681	1			1	-0.460694	0.00949384	2.02256	+	5.8	1	1	0.686813	-0.54201	NaN	1	5.8	1	1	0.729874	-0.454281	NaN	1	8.4	2	2	0.76536	-0.38579	53.949	2
	2540	Tb927.4.4160	Tb927.4.4160	MRB4160	mitochondrial RNA binding protein (MRB4160)	102.78	20.4	0	30.387	1				-0.448324	0.00258553	2.58745	+	16.7	12	9	0.718597	-0.476745	15.511	13	13.8	10	8	0.724428	-0.465086	14.483	8	9.9	7	5	0.75621	-0.403141	14.71	8
	3144	Tb927.7.3160	Tb927.7.3160		Cytoplasmic dynein 1 heavy chain (DYNC1H1), putative	596.65	0.9	0.00056593	3.2511	1				-0.443413	0.0253596	1.59586	+	0.5	2	2	0.6749	-0.567253	43.615	2	0.1	1	1	0.734538	-0.445091	NaN	1	0.4	2	2	0.80224	-0.317894	56.166	2
	3438	Tb927.8.2590	Tb927.8.2590		hypothetical protein, conserved	58.522	5.9	0	28.798	1				-0.437011	0.0229563	1.6391	+	5.9	2	2	0.713012	-0.488001	22.979	4	5.9	2	2	0.697593	-0.519542	20.059	4	3.1	1	1	0.81029	-0.30349	26.189	2
	860	Tb927.10.3160	Tb927.10.3160		hypothetical protein, conserved	14.605	41.5	0	21.115	1				-0.431393	0.0482858	1.31618	+	41.5	4	4	0.80444	-0.313942	6.5995	7	41.5	4	4	0.647585	-0.62686	31.55	7	26.2	3	3	0.78275	-0.353376	22.213	3
	3037	Tb927.7.1090	Tb927.7.1090		hypothetical protein, conserved	171.1	3.4	0.0016265	2.7525	1				-0.423575	0.0373656	1.42753	+	1.8	1	1	0.795229	-0.330558	10.772	2	1.8	1	1	0.663526	-0.591775	19.474	2	1.7	2	2	0.78546	-0.34839	3.5221	2
	3572	Tb927.8.550	Tb927.8.550		peptide methionine sulfoxide reductase, putative,peptide Met(O) reductase, putative,methionine-S-sulfoxide reductase, putative	20.366	10.7	0	5.1068	1				-0.422093	0.0462204	1.33517	+	10.7	2	2	0.688895	-0.537644	32.287	3	10.7	2	2	0.710631	-0.492827	18.827	2	10.7	2	2	0.84921	-0.235807	26.655	4
	3696	Tb927.8.8020	Tb927.8.8020		monoglyceride lipase, putative	35.221	32.2	0	12.422	1				-0.42099	0.0186201	1.73002	+	22.3	4	2	0.755972	-0.403595	8.5567	2	32.2	6	4	0.692809	-0.529471	27.641	3	4.8	1	1	0.79559	-0.329903	NaN	1
	1159	Tb927.10.9720	Tb927.10.9720	REAP-1	RNA-editing-associated protein 1,RNA-binding protein,oligo (U) binding protein,RNA editing complex protein (REAP-1)	64.376	25.2	0	29.243	1				-0.418487	0.0036887	2.43313	+	21.5	5	5	0.762951	-0.390338	20.614	9	21.5	4	4	0.722282	-0.469365	15.018	6	20.6	4	4	0.76009	-0.395758	1.8392	8
	974	Tb927.10.5910	Tb927.10.5910		hypothetical protein, conserved	85.801	3.2	0	3.7869	1				-0.410064	0.00648939	2.1878	+	3.2	2	2	0.750413	-0.414244	8.9437	2	1.6	1	1	0.754774	-0.405884	NaN	1	0	0	0	NaN		NaN	0
	211	Tb11.v5.0195;Tb927.10.6010	Tb11.v5.0195;Tb927.10.6010		hypothetical protein, conserved;hypothetical protein, conserved	115.4	9.3	0	36.452	2				-0.397532	0.0110506	1.95661	+	6.4	6	6	0.802246	-0.317883	2.3502	7	4.2	4	4	0.726375	-0.461214	33.1	4	6.1	5	5	0.7508	-0.413499	98.401	5
	2267	Tb927.3.3510	Tb927.3.3510		hypothetical protein, conserved	52.853	25.9	0	21.923	1				-0.38307	0.042312	1.37354	+	17.1	7	7	0.786473	-0.346531	11.087	9	22.2	8	8	0.688373	-0.538737	10.062	10	12.6	4	4	0.83281	-0.263941	5.102	5
	615	Tb927.10.13150	Tb927.10.13150		hypothetical protein, conserved	96.38	1.9	0.0005637	3.1991	1				-0.382817	0.048205	1.31691	+	1.9	1	1	0.751654	-0.41186	NaN	1	1.9	1	1	0.782534	-0.353775	NaN	1	0	0	0	NaN		NaN	0
	1324	Tb927.11.12590	Tb927.11.12590		hypothetical protein, conserved	27.968	9.1	0	8.4728	1				-0.381561	0.0256188	1.59144	+	9.1	2	2	0.809585	-0.304745	28.071	5	5.5	1	1	0.704722	-0.504875	25.978	2	9.1	2	2	0.79275	-0.335062	15.282	3
	1242	Tb927.11.1090;Tb927.11.1100;Tb11.v5.1038;Tb11.v5.0702	Tb927.11.1090		calpain-like protein, putative,cytoskeleton assocociated protein, putative	658.93	60.5	0	195.34	4				-0.379084	0.0248583	1.60453	+	53.2	14	2	0.722439	-0.469052	24.802	2	54.3	17	3	0.755116	-0.40523	32.973	5	59.1	16	2	0.83337	-0.262971	30.667	2
	2789	Tb927.5.830	Tb927.5.830		hypothetical protein, conserved	65.887	4.2	0	6.8499	1				-0.361459	0.0068728	2.16287	+	4.2	1	1	0.811557	-0.301237	NaN	1	4.2	1	1	0.763009	-0.390228	24.85	3	4.2	1	1	0.76159	-0.392914	NaN	1
	353	Tb11.v5.0868;Tb927.9.2520	Tb11.v5.0868;Tb927.9.2520		mitotubule-associated protein Gb4, putative;microtubule- associated protein (GB4)	110.57	35.5	0	117	2				-0.358906	0.0338843	1.47	+	33.9	12	12	0.779362	-0.359634	21.295	23	33.9	12	12	0.846095	-0.241108	12.273	28	34.2	10	10	0.71898	-0.475976	31.591	11
	1528	Tb927.11.16350	Tb927.11.16350		hypothetical protein, conserved	21.092	7.7	0	4.0068	1				-0.358413	0.0321624	1.49265	+	7.7	1	1	0.742391	-0.42975	20.075	6	7.7	1	1	0.748111	-0.418676	6.8906	3	7.7	1	1	0.85452	-0.226814	6.2206	6
	895	Tb927.10.390	Tb927.10.390		hypothetical protein, conserved	16.343	57.7	0	88.136	1			1	-0.357079	0.0392806	1.40582	+	49.7	4	4	0.775615	-0.366588	25.151	6	25.5	2	2	0.854847	-0.226262	2.0098	5	37.6	3	3	0.71778	-0.478386	10.507	4
	546	Tb927.10.11780	Tb927.10.11780		hypothetical protein, conserved	131.27	5.4	0	6.0912	1				-0.343612	0.0222819	1.65205	+	4	3	3	0.75683	-0.401958	13.79	3	5.4	4	4	0.763475	-0.389347	18.787	5	2.2	2	2	0.84702	-0.239532	1.8791	3
	3962	Tb927.9.4250	Tb927.9.4250		hypothetical protein, conserved	39.967	7.8	0	4.2434	1				-0.340518	0.0426152	1.37044	+	4.3	1	1	0.859328	-0.218719	NaN	1	7.8	2	2	0.72197	-0.46999	5.4808	2	4.3	1	1	0.79397	-0.332844	NaN	1
	272	Tb927.10.540;Tb11.v5.0414	Tb927.10.540;Tb11.v5.0414		ATP-dependent DEAD/H RNA helicase, putative,DEAD box RNA helicase, putative;ATP-dependent DEAD/H RNA helicase, putative	49.226	69.7	0	296.26	2				-0.326261	0.0187584	1.7268	+	64.2	26	26	0.801796	-0.318693	18.696	60	62.4	25	25	0.753523	-0.408277	13.365	52	48.6	21	21	0.83984	-0.251814	19.556	35
	3921	Tb927.9.2650	Tb927.9.2650		hypothetical protein, conserved	66.517	35.8	0	60.56	1				-0.324439	0.00263848	2.57865	+	30.2	9	9	0.808081	-0.307428	11.016	14	26.7	8	8	0.780336	-0.357833	24.836	15	23.6	8	8	0.80773	-0.308055	12.882	10
	893	Tb927.10.3810	Tb927.10.3810		hypothetical protein, conserved	64.888	12.9	0	11.921	1				-0.324286	0.0275001	1.56066	+	9.6	4	4	0.770475	-0.376179	8.047	9	11.1	5	5	0.767283	-0.382169	8.195	11	7.1	4	4	0.86184	-0.214508	24.148	3
	885	Tb927.10.3640	Tb927.10.3640		hypothetical protein, conserved	31.534	19	0	33.081	1			1	-0.316541	0.0198004	1.70333	+	19	5	5	0.755687	-0.40414	10.802	12	19	5	5	0.81666	-0.292193	11.5	11	13.4	4	4	0.83898	-0.253292	6.1153	11
	1937	Tb927.11.8750	Tb927.11.8750		hypothetical protein, conserved	14.537	14.4	0	4.0239	1				-0.309237	0.0264356	1.57781	+	14.4	1	1	0.866476	-0.206768	NaN	1	14.4	1	1	0.776458	-0.36502	NaN	1	14.4	1	1	0.78137	-0.355922	NaN	1
	1074	Tb927.10.8000	Tb927.10.8000		hypothetical protein, conserved	151.01	12.1	0	39.491	1				-0.304508	0.0464186	1.33331	+	6.5	7	7	0.81215	-0.300182	31.965	7	8.1	8	8	0.745156	-0.424385	9.2505	9	6.5	6	6	0.87724	-0.188957	14.665	8
	156	Tb927.10.4330;Tb11.v5.1012;Tb10.v4.0043	Tb927.10.4330;Tb11.v5.1012;Tb10.v4.0043		2-oxoisovalerate dehydrogenase beta subunit, mitochondrial precursor, putative;2-oxoisovalerate dehydrogenase beta subunit, mitochondrial precursor, putative;branched-chain alpha-keto acid dehydrogenase e1-beta subunit precursor, putative,chrX additional	40.222	49.5	0	74.041	3			1	-0.299842	0.0222553	1.65257	+	38.6	8	8	0.852515	-0.230203	11.221	20	40.2	9	9	0.76558	-0.385376	9.1948	20	26.6	6	6	0.82134	-0.283948	4.311	12
	4101	Tb927.9.9550	Tb927.9.9550		hypothetical protein, conserved	24.509	38.2	0	53.526	1				-0.290958	0.00349934	2.45601	+	38.2	7	7	0.83703	-0.256648	11.578	16	33	6	6	0.80952	-0.304861	58.23	9	33	6	6	0.80588	-0.311363	23.609	14
	2911	Tb927.6.3150	Tb927.6.3150		Hydin	501.13	5	0	71.787	1				-0.289402	0.0281132	1.55109	+	3.4	12	12	0.858074	-0.220825	17.952	13	3.1	10	10	0.765404	-0.385707	20.787	11	2	7	7	0.83412	-0.261673	22.616	10
	3715	Tb927.8.960;Tb927.8.940	Tb927.8.960;Tb927.8.940		hypothetical protein, conserved;hypothetical protein, conserved	237.46	11.7	0	55.941	2			1	-0.288919	0.0106085	1.97435	+	7.9	9	9	0.788519	-0.342782	61.18	9	7.1	8	8	0.820816	-0.284869	19.615	8	4.7	7	7	0.84727	-0.239106	24.926	9
	1307	Tb927.11.12210	Tb927.11.12210		hypothetical protein, conserved	32.43	68.4	0	91.048	1				-0.288212	0.0232153	1.63423	+	47.8	10	10	0.857854	-0.221197	15.058	20	59.1	12	12	0.772201	-0.372952	6.1506	21	47.8	10	10	0.82904	-0.270486	13.049	12
	944	Tb927.10.5350;Tb11.v5.0242;Tb11.v5.0241	Tb927.10.5350;Tb11.v5.0242		dynein heavy chain, putative;dynein heavy chain, putative	474.7	10.8	0	84.46	3			1	-0.284995	0.0439009	1.35753	+	7.9	23	23	0.876501	-0.190172	19.07	30	6.7	19	19	0.757346	-0.400975	34.089	20	5	16	15	0.83287	-0.263837	22.283	20
	490	Tb927.10.10370;Tb927.10.10290	Tb927.10.10370;Tb927.10.10290		hypothetical protein, conserved;hypothetical protein, conserved	20.152	54.9	0	10.501	2				-0.282664	0.0170199	1.76904	+	47.3	5	5	0.846453	-0.240497	42.133	5	37.9	4	4	0.780701	-0.357158	18.259	4	21.4	2	2	0.8407	-0.250337	9.2315	2
	3845	Tb927.9.14070	Tb927.9.14070		short-chain dehydrogenase, putative	51.103	34.3	0	51.764	1				-0.282183	0.0075703	2.12089	+	26.6	9	9	0.811162	-0.301939	12.07	15	34.3	11	11	0.805802	-0.311503	14.086	16	17.5	6	6	0.8508	-0.233108	7.3092	7
	1911	Tb927.11.8060	Tb927.11.8060		hypothetical protein, conserved	63.596	18.3	0	102.17	1				-0.279853	0.02887	1.53955	+	18.3	7	7	0.878503	-0.186881	6.1383	12	16.6	6	6	0.784068	-0.35095	9.788	11	10.8	4	4	0.81128	-0.301728	8.9784	8
	3482	Tb927.8.3630	Tb927.8.3630		folate transporter, putative,expression site-associated gene 10 (ESAG10) protein, putative	69.808	22.3	0	47.48	1				-0.277701	0.0424967	1.37165	+	22.3	9	2	0.760341	-0.395282	5.7181	5	20.7	9	2	0.865951	-0.207643	7.3826	5	20.9	8	2	0.85253	-0.230177	NaN	1
	161	Tb11.v5.0537;Tb927.11.9920;Tb11.01.1680.v5	Tb11.v5.0537;Tb927.11.9920;Tb11.01.1680.v5		polyubiquitin, putative;polyubiquitin, putative;polyubiquitin, putative	70.128	45.6	0	32.409	3				-0.277385	0.00466222	2.33141	+	45.6	5	5	0.833681	-0.262433	13.203	17	40.8	4	4	0.838223	-0.254594	13.884	12	40.8	3	3	0.80378	-0.315127	13.622	11
	2256	Tb927.3.3300	Tb927.3.3300		hypothetical protein, conserved	89.197	26.5	0	64.339	1				-0.275339	0.00462183	2.33519	+	19.8	12	12	0.846238	-0.240864	28.683	24	21	13	13	0.823791	-0.27965	23.094	23	24	16	16	0.80916	-0.305503	19.49	25
	2536	Tb927.4.4050	Tb927.4.4050	GAT1	glycosomal transporter (GAT1) (GAT1)	76.05	18	0	31.041	1				-0.274457	0.0441976	1.3546	+	13.2	7	7	0.822301	-0.282262	23.942	13	16.4	8	8	0.771784	-0.373732	16.67	9	6.7	4	4	0.89046	-0.167377	18.27	6
	3057	Tb927.7.1430	Tb927.7.1430		leucine-rich repeat protein (LRRP), putative	47.759	20.1	0	25.023	1			1	-0.268684	0.0426521	1.37006	+	17	5	5	0.898311	-0.154713	13.564	4	10.3	3	3	0.804052	-0.314639	99.981	3	10.3	4	4	0.79185	-0.336701	21.635	4
	3788	Tb927.9.12160	Tb927.9.12160		hypothetical protein, conserved	66.99	2.9	0.00056402	3.2048	1			1	-0.262622	0.00682427	2.16594	+	2.9	1	1	0.831947	-0.265437	NaN	1	0	0	0	NaN		NaN	0	2.9	1	1	0.8352	-0.259806	NaN	1
	2056	Tb927.2.3440;Tb927.2.3460	Tb927.2.3440;Tb927.2.3460		D-alanyl-glycyl endopeptidase-like protein,cysteine peptidase, Clan CA, family C51, putative;D-alanyl-glycyl endopeptidase-like protein,cysteine peptidase, Clan CA, family C51, putative	30.002	21.2	0	38.366	2			1	-0.260678	0.0360169	1.44349	+	13.6	2	2	0.895095	-0.159887	1.069	2	13.6	2	2	0.812678	-0.299245	23.954	3	5.9	1	1	0.79946	-0.322902	12.931	2
	1566	Tb927.11.1690	Tb927.11.1690		hypothetical protein, conserved	20.428	24.6	0	43.28	1				-0.259134	0.0222193	1.65327	+	24.6	3	3	0.818063	-0.289716	10.955	7	24.6	3	3	0.88199	-0.181166	6.9982	7	13.7	1	1	0.80859	-0.30652	9.1986	2
	2334	Tb927.3.4970	Tb927.3.4970		hypothetical protein, conserved	115.81	15.7	0	81.508	1				-0.25835	0.019999	1.69899	+	12.7	9	9	0.862515	-0.213378	25.154	12	12.3	9	9	0.79447	-0.331934	14.918	11	5.2	4	4	0.85279	-0.229738	18.918	5
	3283	Tb927.7.6280	Tb927.7.6280		hypothetical protein, conserved	72.053	6.6	0	5.4989	1			1	-0.257992	0.0483777	1.31536	+	6.6	4	4	0.867679	-0.204767	61.436	7	3.1	2	2	0.770772	-0.375623	0.22913	2	1.9	1	1	0.87443	-0.193585	3.4342	4
	3281	Tb927.7.6260	Tb927.7.6260		hypothetical protein, conserved	36.454	52.5	0	139.78	1				-0.254815	0.0223496	1.65073	+	47.8	13	13	0.840195	-0.251204	13.056	35	45.7	11	11	0.799041	-0.323658	5.4975	31	46	12	12	0.87686	-0.189581	9.9643	27
	160	Tb927.10.6960;Tb927.10.6920;Tb10.v4.0248	Tb927.10.6960;Tb927.10.6920;Tb10.v4.0248		hypothetical protein, conserved;hypothetical protein;hypothetical protein,chrX additional, unordered contigs	36.056	25.6	0	15.908	3				-0.252265	0.0241985	1.61621	+	15	4	4	0.825696	-0.276318	7.218	6	22.5	6	6	0.808734	-0.306262	10.602	8	18.1	5	5	0.88625	-0.174214	17.618	6
	1095	Tb927.10.830	Tb927.10.830		adenylate kinase, putative	29.765	62.7	0	68.575	1				-0.251982	0.00748447	2.12584	+	62.3	11	11	0.864977	-0.209266	11.962	20	51.5	11	11	0.822504	-0.281906	4.338	22	39.2	7	7	0.83233	-0.264772	12.471	12
	4093	Tb927.9.9230	Tb927.9.9230		hypothetical protein, conserved	19.876	25.4	0	15.719	1				-0.247251	0.00435927	2.36059	+	25.4	3	3	0.849979	-0.234501	3.5311	4	25.4	3	3	0.854117	-0.227495	16.688	4	4.7	1	1	0.82373	-0.279757	19.276	2
	3901	Tb927.9.2050	Tb927.9.2050		membrane protein YIP1, putative	46.169	11.3	0	9.4847	1				-0.244641	0.00359081	2.44481	+	11.3	3	3	0.835631	-0.259062	64.24	5	11.3	3	3	0.861401	-0.215244	7.14	6	5.3	1	1	0.83531	-0.259616	10.658	2
	1417	Tb927.11.1430	Tb927.11.1430		hypothetical protein, conserved	86.855	60.6	0	298.08	1			1	-0.244172	0.0451888	1.34497	+	58.1	34	34	0.873362	-0.195348	12.672	71	57.7	34	34	0.78376	-0.351515	13.835	66	55.1	34	34	0.87925	-0.185655	18.39	54
	3213	Tb927.7.4330	Tb927.7.4330		hypothetical protein, conserved	99.887	2.4	0.004091	2.0185	1				-0.239702	0.0123145	1.90958	+	2.4	1	1	0.849907	-0.234624	NaN	1	2.4	1	1	0.818733	-0.288536	NaN	1	2.4	1	1	0.873	-0.195946	NaN	1
	2794	Tb927.5.910	Tb927.5.910		oligosaccharyl transferase subunit, putative	92.296	22.3	0	19.495	1				-0.238636	0.000948781	3.02283	+	21.3	14	2	0.839208	-0.2529	7.4491	5	20	14	2	0.849907	-0.234624	2.7369	3	14	10	2	0.85359	-0.228385	28.359	5
	729	Tb927.10.15130	Tb927.10.15130	SEC22	synaptobrevin-type vesicle transport protein, putative,protein SLY2 (SEC22)	29.48	18	0	17.019	1				-0.237798	0.025661	1.59073	+	12.5	3	3	0.845237	-0.242572	18.087	4	18	4	4	0.889917	-0.168257	8.1763	3	5.9	1	1	0.81081	-0.302564	NaN	1
	275	Tb927.10.15850;Tb11.v5.0427	Tb927.10.15850;Tb11.v5.0427	PEX12	peroxin 12 (PEX12);peroxisome assembly protein, putative	43.172	33.9	0	29.836	2				-0.233531	0.0221564	1.6545	+	30.4	8	8	0.851281	-0.232292	27.468	11	25.3	7	7	0.814863	-0.29537	46.044	11	12.2	3	3	0.88704	-0.172929	8.8008	5
	2481	Tb927.4.2650	Tb927.4.2650		hypothetical protein, conserved	58.907	7.9	0	8.4854	1			1	-0.231712	0.0254717	1.59394	+	6.5	3	3	0.838223	-0.254594	16.603	4	3.7	2	2	0.822166	-0.282499	NaN	1	3.5	2	2	0.89624	-0.158043	10.672	2
	3350	Tb927.7.920;Tb11.v5.0698	Tb927.7.920		dynein heavy chain, putative	468.08	13.3	0	100.92	2				-0.22613	0.00416305	2.38059	+	8.4	25	24	0.871536	-0.198368	28.371	30	8.5	26	25	0.842034	-0.248049	18.326	30	5.4	17	14	0.85147	-0.231972	46.924	19
	1700	Tb927.11.3880	Tb927.11.3880	TRYPARP	actin, putative (TRYPARP)	47.559	24.5	0	14.652	1				-0.225764	0.0414752	1.38221	+	13.4	4	4	0.858222	-0.220578	8.5407	8	19.9	6	6	0.903587	-0.146264	15.86	13	15.7	4	4	0.80639	-0.31045	18.899	5
	139	Tb927.5.4390;Tb05.5K5.40	Tb927.5.4390;Tb05.5K5.40		hypothetical protein, conserved;hypothetical protein, conserved,BAC from homologous region on chr5	15.063	47.4	0	11.012	2			1	-0.224752	0.0202937	1.69264	+	47.4	3	3	0.879894	-0.184598	8.8175	4	23	1	1	0.818398	-0.289126	NaN	1	37.8	2	2	0.87023	-0.200531	9.404	3
	3051	Tb927.7.1310	Tb927.7.1310		hypothetical protein, conserved	152.52	9.2	0	18.634	1			1	-0.224448	0.00785766	2.10471	+	7.8	7	7	0.858664	-0.219835	16.467	8	6.5	6	6	0.875197	-0.192321	13.106	7	5	4	4	0.8344	-0.261189	146.3	4
	965	Tb927.10.5790	Tb927.10.5790		hypothetical protein, conserved	59.193	18.3	0	19.727	1				-0.224103	0.0283058	1.54812	+	10.3	5	5	0.868885	-0.202762	12.056	4	11.4	5	5	0.812876	-0.298893	12.034	5	6.7	3	3	0.88844	-0.170654	151.52	3
	3223	Tb927.7.4680	Tb927.7.4680		hypothetical protein, conserved	10.339	14.8	0	6.7743	1				-0.215479	0.00449677	2.3471	+	14.8	2	2	0.844595	-0.243669	24.755	2	14.8	2	2	0.866176	-0.207268	13.861	2	14.8	1	1	0.87327	-0.1955	NaN	1
	1786	Tb927.11.5510	Tb927.11.5510		dynein light chain p28, axonemal, putative	27.371	34.5	0	31.262	1				-0.209124	0.0333402	1.47703	+	30.6	7	7	0.826993	-0.274053	16.305	9	23.4	5	5	0.861772	-0.214622	7.9067	8	20.4	5	5	0.90834	-0.138696	30.57	5
	2398	Tb927.4.1020	Tb927.4.1020		serine-palmitoyl-CoA transferase, putative	54.128	37.8	0	72.164	1				-0.204343	0.00724891	2.13973	+	33.7	14	14	0.888257	-0.170951	27.437	23	30.8	13	13	0.852588	-0.23008	26.801	21	37.6	15	15	0.86334	-0.211999	14.22	20
	2706	Tb927.5.2950	Tb927.5.2950		hypothetical protein, conserved	88.256	22.3	0	48.334	1				-0.19277	0.00582169	2.23495	+	18.2	12	12	0.872372	-0.196985	16.491	16	14.2	11	11	0.860956	-0.215989	16.011	15	8.1	4	4	0.89172	-0.165337	6.3469	5
	800	Tb927.10.2190	Tb927.10.2190		hypothetical protein, conserved	34.552	44.6	0	138.42	1				-0.190136	0.0280643	1.55185	+	34	8	8	0.866701	-0.206393	12.207	21	34	8	8	0.848752	-0.236584	63.179	20	26.9	6	6	0.91546	-0.127431	39.929	10
	3578	Tb927.8.560	Tb927.8.560		hypothetical protein, conserved	64.616	33.8	0	81.363	1				-0.18626	0.00395023	2.40338	+	30.3	10	10	0.872296	-0.19711	13.201	15	29.5	9	9	0.871232	-0.198871	21.236	12	25.5	8	8	0.89329	-0.1628	29.14	11
	2931	Tb927.6.3630	Tb927.6.3630	SPL	sphingosine 1-phosphate lyase, putative (SPL)	59.525	42	0	91.174	1			1	-0.183904	0.0494022	1.30625	+	40.3	16	16	0.850196	-0.234133	21.694	34	38.3	15	15	0.859697	-0.218099	11.89	26	36.1	14	14	0.93337	-0.099479	12.107	23
	4039	Tb927.9.7250	Tb927.9.7250		hypothetical protein, conserved	20.911	29.5	0	11.583	1				-0.182166	0.0248724	1.60428	+	21.9	2	2	0.88574	-0.175045	11.335	3	19.1	2	2	0.877039	-0.189287	NaN	1	0	0	0	NaN		NaN	0
	2284	Tb927.3.3820	Tb927.3.3820		hypothetical protein, conserved	45.231	20.4	0	22.588	1				-0.18092	0.0112111	1.95035	+	14	4	4	0.891345	-0.165944	10.262	9	20.4	5	5	0.896539	-0.157561	19.07	11	11.6	3	3	0.85901	-0.219253	11.379	9
	3019	Tb927.6.620	Tb927.6.620		hypothetical protein, conserved	301.88	7.1	0	36.008	1				-0.180437	0.0219875	1.65782	+	3.8	6	6	0.916338	-0.126048	23.553	8	3.7	7	7	0.865127	-0.209017	35.242	9	2.2	4	4	0.86679	-0.206246	12.939	5
	3355	Tb927.7.990	Tb927.7.990		chaperone protein DNAj, putative	86.6	41.8	0	143.18	1				-0.179661	0.0249117	1.6036	+	36.2	23	23	0.851934	-0.231187	17.817	33	36.5	20	20	0.884799	-0.176578	13.171	24	20.2	11	11	0.91306	-0.131219	11.547	19
	3153	Tb927.7.3330	Tb927.7.3330		hypothetical protein, conserved	502.65	52.1	0	254.79	1				-0.179221	0.0327931	1.48422	+	48.2	29	29	0.914244	-0.129349	15.198	52	49.2	32	32	0.84538	-0.242328	15.534	45	47.9	29	29	0.89132	-0.165985	23.167	48
	3512	Tb927.8.4330	Tb927.8.4330	RAB11	small GTP-binding protein Rab11 (RAB11)	23.527	59.3	0	124.82	1				-0.176637	0.0121156	1.91665	+	51.9	9	9	0.896298	-0.157949	7.9911	17	54.2	9	9	0.86103	-0.215865	21.135	17	52.3	9	9	0.89745	-0.156096	8.7437	13
	2019	Tb927.2.1810	Tb927.2.1810	ISWI	transcription silencer (ISWI)	132.76	36.2	0	130.03	1			1	-0.176165	0.0485903	1.31345	+	30.7	25	25	0.847386	-0.238909	18.069	40	26.1	21	21	0.877424	-0.188654	22.28	31	19.4	16	16	0.93243	-0.100933	19.178	23
	2338	Tb927.3.5020	Tb927.3.5020		hypothetical protein, conserved	155.86	20.8	0	93.639	1				-0.17216	0.0401688	1.39611	+	16	16	16	0.858664	-0.219835	16.09	23	16.5	17	17	0.874126	-0.194087	28.158	18	9.3	11	11	0.93138	-0.102558	34.41	14
	2731	Tb927.5.3400	Tb927.5.3400		calcium-translocating P-type ATPase,calcium pump	110.32	50.3	0	323.31	1				-0.171847	0.00181139	2.74199	+	43.1	35	35	0.885897	-0.17479	10.396	90	45	36	36	0.896298	-0.157949	7.8194	81	40.9	34	34	0.88099	-0.182802	18.719	72
	1342	Tb927.11.13010	Tb927.11.13010		hypothetical protein	22.171	30.6	0	19.307	1				-0.161173	0.0116903	1.93217	+	27	4	4	0.903751	-0.146003	23.912	8	27	4	4	0.872829	-0.196229	31.825	7	30.6	5	5	0.90671	-0.141287	7.5858	8
	3034	Tb927.7.1060	Tb927.7.1060		hypothetical protein, conserved	53.733	27.9	0	57.363	1			1	-0.15981	0.0458876	1.33831	+	17.6	6	6	0.877424	-0.188654	14.318	7	20.9	6	6	0.869641	-0.201508	15.922	7	15	5	5	0.94	-0.0892673	22.043	7
	1189	Tb927.11.10120	Tb927.11.10120		hypothetical protein, conserved	92.377	7.7	0	12.863	1				-0.159381	0.029585	1.52893	+	5.9	4	4	0.863185	-0.212258	25.445	3	4.5	3	3	0.922254	-0.116764	22.601	3	2.6	2	2	0.9018	-0.149121	NaN	1
	3260	Tb927.7.5700	Tb927.7.5700		hypothetical protein, conserved	35.717	42.8	0	43.069	1				-0.158348	0.00906131	2.04281	+	40	9	9	0.879275	-0.185613	14.758	19	34.7	8	8	0.897344	-0.156267	19.843	17	16.6	4	4	0.91183	-0.133163	15.521	7
	166	Tb11.02.5360b;Tb11.02.5360	Tb11.02.5360b;Tb11.02.5360		hypothetical protein, conserved;hypothetical protein, conserved	34.266	5.2	0	5.6067	2				-0.158019	0.0127496	1.8945	+	5.2	1	1	0.884017	-0.177854	16.091	2	5.2	1	1	0.886289	-0.174151	1.0832	2	5.2	1	1	0.91888	-0.122052	NaN	1
	620	Tb927.10.13230	Tb927.10.13230		hypothetical protein, conserved	50.454	12.3	0	19.814	1				-0.157893	0.0441482	1.35509	+	12.3	4	4	0.929714	-0.105142	6.5642	5	10.7	3	3	0.857192	-0.22231	13.336	5	10.7	3	3	0.90361	-0.146228	7.6933	4
	3225	Tb927.7.4760;Tb11.v5.0159	Tb927.7.4760;Tb11.v5.0159		hypothetical protein, conserved;hypothetical protein, conserved	58.815	30.2	0	32.643	2			1	-0.157409	0.0418826	1.37797	+	21.3	6	6	0.85778	-0.22132	7.5648	10	26.9	8	8	0.926956	-0.109427	25.932	12	21.7	6	6	0.90659	-0.141478	15.145	6
	3492	Tb927.8.3950	Tb927.8.3950		hypothetical protein, conserved	102.13	20	0	65.767	1				-0.155786	0.0118572	1.92602	+	13.3	10	10	0.919118	-0.121679	26.342	13	8.6	6	6	0.888652	-0.17031	9.4917	6	14.3	9	9	0.88554	-0.175371	17.821	12
	4081	Tb927.9.8950	Tb927.9.8950		CAAX prenyl protease 1, putative,metallo- peptidase, Clan M- Family M48	48.904	38.6	0	97.57	1			1	-0.154949	0.0273949	1.56233	+	32.6	13	13	0.890313	-0.167615	13.439	27	38.6	15	15	0.93006	-0.104605	14.77	29	18.7	9	9	0.87501	-0.192629	27.861	17
	1653	Tb927.11.3100	Tb927.11.3100		hypothetical protein, conserved	39.598	19.1	0	26.548	1				-0.154245	0.0396256	1.40202	+	11	4	4	0.91954	-0.121015	12.247	6	11	4	4	0.917515	-0.124196	13.3	8	13.8	5	5	0.86004	-0.217524	16.684	5
	2593	Tb927.4.590	Tb927.4.590		hypothetical protein, conserved	88.024	60	0	323.31	1				-0.153998	0.0287546	1.54129	+	54.9	32	32	0.868583	-0.203264	20.023	56	52.8	30	30	0.903016	-0.147176	18.403	57	37.3	20	20	0.92559	-0.111555	11.68	35
	3489	Tb927.8.3790	Tb927.8.3790	PFC2	paraflagellar rod component, putative (PFC2)	25.119	30.9	0	16.775	1				-0.153952	0.0349757	1.45623	+	25.1	3	3	0.93633	-0.0949116	6.3303	4	25.1	3	3	0.882457	-0.180403	19.409	5	26	3	3	0.87871	-0.186541	0.48094	2
	582	Tb927.10.12510	Tb927.10.12510		P-type H -ATPase, putative	100.63	48.2	0	31.518	1				-0.150915	0.0275432	1.55998	+	45.8	36	4	0.874891	-0.192825	6.6697	21	44.1	34	3	0.897908	-0.155361	3.3191	20	37.1	26	5	0.93009	-0.104558	14.385	18
	2496	Tb927.4.3130	Tb927.4.3130		Spef1	30.637	19.3	0	15.332	1				-0.148523	0.0373888	1.42726	+	19.3	4	4	0.87382	-0.194591	19.744	5	14.5	3	3	0.896539	-0.157561	27.927	3	10.2	2	2	0.9373	-0.0934173	23.785	3
	2155	Tb927.3.1200	Tb927.3.1200		hypothetical protein, conserved	83.763	22.8	0	74.762	1				-0.139323	0.00813842	2.08946	+	16	8	8	0.897908	-0.155361	23.471	12	10.9	5	5	0.923788	-0.114367	17.368	8	11.8	6	6	0.90235	-0.148241	13.983	7
	2610	Tb927.4.870	Tb927.4.870		dynein heavy chain, putative	527.12	12.8	0	138.62	1				-0.139191	0.0414823	1.38214	+	9.1	33	32	0.901226	-0.15004	25.446	43	8.9	31	30	0.880514	-0.183582	20.279	40	7.7	28	27	0.94347	-0.0839514	24.795	31
	1154	Tb927.10.9650	Tb927.10.9650		hypothetical protein, conserved	152.97	23.8	0	152.1	1				-0.134661	0.0139939	1.85406	+	17.6	17	3	0.891822	-0.165172	11.634	5	18	17	4	0.926269	-0.110497	6.6291	7	15.2	15	3	0.9149	-0.128314	17.533	4
	609	Tb927.10.13040	Tb927.10.13040	GRESAG4	receptor-type adenylate cyclase GRESAG 4, putative,ESAG 4 (expression site-associated gene 4) protein, putative	133.33	15.9	0	44.537	1				-0.134287	0.0113578	1.94471	+	13.6	11	10	0.912992	-0.131326	50.165	12	11.2	10	9	0.926012	-0.110898	25.063	11	11.3	9	7	0.89463	-0.160637	47.464	11
	1966	Tb927.11.9350	Tb927.11.9350		phosphonopyruvate decarboxylase-like protein, putative	42.313	10.8	0.0077076	1.6477	1			1	-0.133399	0.00423776	2.37286	+	0	0	0	NaN		NaN	0	7.8	1	1	0.912242	-0.132511	NaN	1	3	1	1	0.91112	-0.134287	NaN	1
	216	Tb927.10.6120;Tb11.v5.0204	Tb927.10.6120;Tb11.v5.0204		hypothetical protein, conserved;hypothetical protein, conserved	27.225	16.3	0	14.553	2				-0.132603	0.0213162	1.67129	+	11.4	1	1	0.914997	-0.128161	39.304	3	0	0	0	NaN		NaN	0	4.9	1	1	0.90938	-0.137045	NaN	1
	2431	Tb927.4.1740	Tb927.4.1740		hypothetical protein, conserved	47.677	31.5	0	58.37	1			1	-0.126769	0.0339386	1.46931	+	22.3	5	5	0.92584	-0.111165	23.385	7	21.3	6	6	0.936067	-0.0953169	10.95	7	15.6	5	5	0.88649	-0.173824	21.042	6
	2489	Tb927.4.2850	Tb927.4.2850		hypothetical protein, conserved	72.637	11.2	0	31.606	1				-0.124546	0.0198025	1.70328	+	10	5	5	0.931446	-0.102457	18.823	6	7.9	5	5	0.925669	-0.111432	8.7779	6	5.3	3	3	0.89518	-0.15975	26.059	2
	2143	Tb927.3.1040	Tb927.3.1040		hypothetical protein, conserved (pseudogene),hypothetical protein, conserved, interrupted	46.322	25.4	0	33.024	1			1	-0.122207	0.0422593	1.37408	+	19.1	7	7	0.903016	-0.147176	13.965	10	20.4	7	7	0.901795	-0.149129	27.698	7	13.3	5	5	0.95243	-0.0703151	25.48	7
	3730	Tb927.9.10370	Tb927.9.10370		TAX-1	40.684	19.6	0	32.009	1				-0.121747	0.0235984	1.62712	+	16.8	4	4	0.90876	-0.138028	16.407	4	11	3	3	0.943574	-0.083792	11.642	4	11	3	3	0.90537	-0.143421	13.959	4
	4014	Tb927.9.6460	Tb927.9.6460		hypothetical protein, conserved	170.34	25.1	0	108.34	1				-0.113588	0.0138433	1.85876	+	18.2	19	19	0.941442	-0.0870554	22.387	25	19.5	20	20	0.918611	-0.122474	19.761	24	14.9	17	17	0.91305	-0.131234	21.933	30
	1693	Tb927.11.3750	Tb927.11.3750	B5R	NADH-cytochrome b5 reductase, putative (B5R)	34.091	45.8	0	78.028	1				-0.110507	0.0294028	1.53161	+	40.5	7	7	0.930839	-0.103397	11.311	11	34.6	6	6	0.945358	-0.081067	18.827	10	22.5	5	5	0.90309	-0.147058	11.282	8
	2959	Tb927.6.4210	Tb927.6.4210	ALDH	aldehyde dehydrogenase, putative (ALDH)	64.566	55.5	0	182.73	1				-0.1024	0.0162312	1.78965	+	51.6	17	17	0.946432	-0.0794292	36.339	33	53.9	18	18	0.931359	-0.102591	11.983	31	45	16	16	0.91689	-0.125179	13.919	26
	3102	Tb927.7.2390	Tb927.7.2390		hypothetical protein, conserved	102.86	36.5	0	131.84	1			1	-0.10129	0.00859589	2.06571	+	34.7	27	27	0.944287	-0.0827026	22.581	41	29.9	22	22	0.9243	-0.113567	34.55	33	26.6	19	19	0.92813	-0.107601	21.914	31
	760	Tb927.10.15760	Tb927.10.15760		hypothetical protein, conserved	36.411	76.5	0	323.31	1				-0.100793	0.00216128	2.66529	+	76.2	21	21	0.932314	-0.101112	23.026	80	76.5	21	21	0.927386	-0.108759	9.686	77	75.9	20	20	0.93789	-0.0925094	7.6686	76
	2984	Tb927.6.4630	Tb927.6.4630		kinetoplastid-specific phospho-protein phosphatase, putative	39.848	21	0	23.634	1				-0.100239	0.0230906	1.63656	+	15.8	3	3	0.948227	-0.0766959	45.267	3	15.8	3	3	0.91416	-0.129481	32.961	3	9.3	2	2	0.93657	-0.0945414	12.296	2
	3890	Tb927.9.1710	Tb927.9.1710		hypothetical protein, conserved	52.951	21.1	0	43.918	1				-0.0951628	0.00606612	2.21709	+	13.5	3	3	0.933358	-0.0994972	1.3865	5	15.7	4	4	0.945626	-0.0806576	1.5294	7	8.4	3	3	0.92959	-0.105334	101.19	4
	1631	Tb927.11.2670	Tb927.11.2670	TbNup59	Nucleoporin (TbNup59)	58.822	53.2	0	137.78	1			1	-0.0767621	0.0293739	1.53204	+	42.6	16	16	0.964692	-0.0518593	14.615	35	51	17	17	0.945805	-0.0803848	15.921	30	32.3	13	13	0.9343	-0.0980422	10.467	29
	817	Tb927.10.240	Tb927.10.240	PEX14	peroxin 14, putative (PEX14)	39.937	59	0	84.621	1				-0.0722594	0.00511629	2.29104	+	45.6	13	13	0.945448	-0.0809306	16.485	32	51.6	14	14	0.950751	-0.0728604	23.917	30	50.3	12	12	0.95728	-0.0629872	9.1506	27
	794	Tb927.10.2040	Tb927.10.2040		protein kinase, putative	93.874	3.7	0	15.045	1				-0.0706849	0.0193163	1.71408	+	1.4	1	1	0.963206	-0.0540844	NaN	1	2.3	1	1	0.940468	-0.0885487	NaN	1	3.7	2	2	0.95302	-0.0694215	3.0599	3
	1058	Tb927.10.7700	Tb927.10.7700		ABC transporter, putative	75.051	36.2	0	176.93	1				-0.0699605	0.000100481	3.99792	+	36.2	21	21	0.951747	-0.0713507	9.0507	44	33.5	20	20	0.953016	-0.0694271	21.743	41	25.7	14	14	0.95323	-0.0691037	17.941	24
	2077	Tb927.2.4230;Tb11.v5.0827	Tb927.2.4230		NUP-1 protein, putative	406.9	31.2	0	298.65	2			1	-0.0685382	0.0442415	1.35417	+	28.7	18	18	0.936067	-0.0953169	29.342	30	28.8	18	18	0.97012	-0.0437644	9.988	28	27.8	15	15	0.95493	-0.0665332	10.972	28
	3961	Tb927.9.4230	Tb927.9.4230	ACS4	fatty acyl CoA synthetase 4 (ACS4)	77.871	58	0	67.962	1				-0.0579417	0.0443916	1.3527	+	55.6	34	4	0.944198	-0.0828388	10.682	8	55.1	35	4	0.966464	-0.0492126	20.303	8	44.6	29	3	0.97146	-0.0417736	10.436	4
	3197	Tb927.7.4030	Tb927.7.4030		hypothetical protein, conserved	59.792	11.5	0	14.095	1				-0.0243422	0.0413616	1.3834	+	11.5	3	3	0.984349	-0.0227584	18.639	3	0	0	0	NaN		NaN	0	3.5	1	1	0.98219	-0.0259259	NaN	1
	574	Tb927.10.12400	Tb927.10.12400		membrane transporter protein, putative	51.409	6	0	10.819	1				-0.0226822	0.029849	1.52507	+	6	4	4	0.983574	-0.0238941	17.21	6	6	4	4	0.989511	-0.0152121	18.872	5	6	4	4	0.98014	-0.0289404	13.783	6
	1950	Tb927.11.8990	Tb927.11.8990		cation transporter, putative	41.116	5.9	0	6.6493	1				0.00539131	0.00683863	2.16503	+	3.1	1	1	1.0037	0.00533346	1.1696	2	5.9	2	2	1.00378	0.00544928	12.221	3	2.8	1	1	NaN		NaN	0
	1716	Tb927.11.4200	Tb927.11.4200		lectin, putative,mannose-specific lectin, putative	62.272	22	0	47.761	1				0.0271395	0.0463303	1.33414	+	22	8	8	1.0128	0.0183518	21.646	16	18.2	7	7	1.02722	0.0387471	14.937	17	16.7	6	6	1.017	0.0243196	21.99	16
	2550	Tb927.8.7980;Tb927.4.4380	Tb927.8.7980;Tb927.4.4380	TVP1	vacuolar-type proton translocating pyrophosphatase 1 (TVP1);vacuolar-type proton translocating pyrophosphatase 1, putative (PPase1)	86.003	31.6	0	323.31	2				0.0827649	0.0471142	1.32685	+	30.3	23	23	1.0801	0.111165	9.4107	82	31.6	24	24	1.06397	0.0894515	11.738	86	24.6	20	20	1.0336	0.0476779	9.4882	61
	862	Tb927.10.3200	Tb927.10.3200	U2AF35	U2 splicing auxiliary factor, putative (U2AF35)	29.114	48.6	0	106.95	1				0.0938538	0.010759	1.96823	+	45.3	9	9	1.07993	0.110932	7.1993	28	48.2	10	10	1.05477	0.0769345	9.8324	27	36.8	9	9	1.0671	0.0936954	16.454	18
	1350	Tb927.11.13190;Tb927.11.13090	Tb927.11.13190;Tb927.11.13090		elongation factor 1 gamma, putative;elongation factor 1 gamma, putative	46.275	75.5	0	323.31	2			1	0.0954781	0.00480449	2.31835	+	75.2	29	29	1.07174	0.0999582	14.793	111	74.8	29	29	1.05878	0.0824078	14.874	100	63.6	24	24	1.0748	0.104068	12.022	70
	3397	Tb927.8.1870	Tb927.8.1870	tGLP1	Golgi/lysosome glycoprotein 1 (tGLP1)	67.597	48.7	0	323.31	1				0.101424	0.00644687	2.19065	+	48.7	24	24	1.06256	0.0875494	19.711	65	47.4	23	23	1.08363	0.115879	16.33	60	43.8	21	21	1.0724	0.100843	14.149	46
	1663	Tb927.11.3280	Tb927.11.3280	Kif13-5	kinesin, putative,MCAK-like kinesin, putative (Kif13-5)	80.07	28.4	0	68.068	1				0.115849	0.0422472	1.3742	+	19.9	9	8	1.12108	0.164884	7.8462	13	23.8	10	9	1.06281	0.0878867	16.017	9	21	7	6	1.0679	0.0947765	24.646	9
	1141	Tb927.10.920	Tb927.10.920		hypothetical protein, conserved	32.531	18.2	0	13.379	1				0.122457	0.0318514	1.49687	+	15.5	4	4	1.09384	0.129403	14.512	8	11.8	3	3	1.05751	0.0806676	12.39	5	11.4	3	3	1.1152	0.157303	22.26	4
	461	Tb927.1.640	Tb927.1.640		BRCA2	176.31	2.3	0	8.1024	1				0.123899	0.0377958	1.42256	+	2.3	3	3	1.11887	0.162041	6.0182	3	1.8	2	2	1.09602	0.132277	66.765	3	0.7	1	1	1.0551	0.0773797	NaN	1
	3487	Tb927.8.3750	Tb927.8.3750	NOP56	nucleolar protein, putative	54.358	68.7	0	315.39	1				0.132611	0.0426216	1.37037	+	65	27	26	1.12184	0.165871	16.87	68	65.2	27	26	1.05434	0.0763412	18.981	59	57.3	24	23	1.1139	0.15562	12.444	43
	189	Tb11.v5.0154;Tb927.7.4700	Tb11.v5.0154;Tb927.7.4700		hypothetical protein, conserved;hypothetical protein, conserved	77.689	46.8	0	140.11	2				0.139272	0.00644992	2.19045	+	37.1	19	19	1.11781	0.160669	22.335	33	39.8	21	21	1.09774	0.13454	17.361	32	27.1	14	14	1.0887	0.122607	12.504	24
	1882	Tb927.11.7360	Tb927.11.7360		palmitoyl acyltransferase 9, putative	33.539	8.2	0.00057061	3.3602	1				0.148112	0.0453775	1.34316	+	8.2	2	2	1.10003	0.137537	NaN	1	4.3	1	1	1.11627	0.158687	NaN	1	0	0	0	NaN		NaN	0
	673	Tb927.10.1420;Tb11.v5.0783	Tb927.10.1420	MetAP2	methionine aminopeptidase 2, putative,metallo- peptidase, Clan MG, Family M24 (MetAP2)	51.382	59.2	0	182.7	2				0.148513	0.001458	2.83624	+	52.1	14	14	1.10211	0.140269	17.882	28	47.5	13	13	1.11682	0.159396	13.531	21	40	11	11	1.1064	0.145873	18.488	14
	576	Tb927.10.12420	Tb927.10.12420		predicted S. cerevisiae Got1 homologue	15.605	20.4	0	6.5572	1				0.151125	0.0471194	1.3268	+	7	1	1	1.11909	0.162331	NaN	1	20.4	2	2	1.10184	0.139919	6.002	2	0	0	0	NaN		NaN	0
	3028	Tb927.6.850;Tb11.v5.0689	Tb927.6.850;Tb11.v5.0689	NOT2	ccr4-not transcription complex subunit 2;hypothetical protein, conserved	37.396	35.2	0	34.971	2				0.151368	0.00735406	2.13347	+	23.3	4	4	1.09183	0.126754	8.4731	4	20	3	3	1.11431	0.156145	30.532	7	23.6	4	4	1.126	0.171207	6.9967	5
	3272	Tb927.7.5940	Tb927.7.5940	PAD2	Protein Associated with Differentiation (TbPAD2)	67.151	32.2	0	284.02	1				0.15894	0.03214	1.49295	+	26.9	12	5	1.10355	0.142146	9.7792	16	32.2	14	5	1.16133	0.215781	12.209	18	21.3	10	4	1.0859	0.118891	27.719	12
	1614	Tb927.11.2470	Tb927.11.2470		aminopeptidase, putative,metallo-peptidase, Clan MF, Family M17	60.585	69.9	0	323.31	1				0.163282	0.0348225	1.45814	+	67.1	20	20	1.15865	0.212451	30.637	50	69.7	21	21	1.07562	0.105163	40.88	46	40	13	13	1.1268	0.172231	10.877	28
	2836	Tb927.6.1770	Tb927.6.1770		kinesin, putative	69.409	22.9	0	108.13	1				0.169495	0.029502	1.53015	+	21.3	9	9	1.11534	0.15748	9.4971	12	17.7	7	7	1.0905	0.124991	12.291	11	19.4	8	8	1.1696	0.226015	24.02	11
	1474	Tb927.11.15430	Tb927.11.15430		U5 small nuclear ribonucleoprotein component, putative,U5 snrnp-specific protein, putative	105.47	12.3	0	18.633	1				0.176972	0.0268948	1.57033	+	8.4	7	7	1.16874	0.224958	41.363	11	10.1	8	8	1.08891	0.122884	62.753	14	9.1	7	7	1.1353	0.183074	14.67	11
	1246	Tb927.11.11000	Tb927.11.11000		hypothetical protein, conserved	54.823	19.1	0	40.219	1				0.181805	0.0268692	1.57075	+	15	5	5	1.16406	0.219169	8.6022	9	11.2	4	4	1.15245	0.204698	18.099	7	10.5	4	4	1.0879	0.121546	16.288	5
	3604	Tb927.8.6020	Tb927.8.6020		hypothetical protein, conserved	40.341	2.2	0.0028446	2.1535	1				0.194651	0.0360333	1.4433	+	2.2	1	1	1.13573	0.183621	NaN	1	2.2	1	1	1.15323	0.20568	NaN	1	0	0	0	NaN		NaN	0
	2370	Tb927.3.5620	Tb927.3.5620		hypothetical protein, conserved	112.6	45.3	0	176.89	1				0.197581	0.0119542	1.92248	+	39	26	26	1.17984	0.238596	16.287	36	36.4	25	25	1.14067	0.189878	15.256	32	32.9	22	22	1.1206	0.164271	19.407	33
	1221	Tb927.11.10560	Tb927.11.10560		eukaryotic translation initation factor 4 gamma, putative	79.7	43	0	141.05	1			1	0.197967	0.0373014	1.42827	+	38.9	24	24	1.15465	0.207461	11.2	49	39.6	24	24	1.09094	0.125573	26.529	42	19.5	13	13	1.1982	0.260869	14.13	27
	3315	Tb927.7.700	Tb927.7.700		hypothetical protein, conserved	74.25	16.4	0	35.979	1				0.198216	0.0435597	1.36092	+	12.5	6	6	1.21625	0.282439	11.572	6	11.4	5	5	1.10424	0.143054	27.179	8	9.9	5	5	1.1244	0.169155	14.292	7
	856	Tb927.10.310	Tb927.10.310	PUF3	pumillio/PUF RNA binding protein 3 (PUF3)	61.06	7.7	0	6.1999	1				0.20001	0.00535374	2.27134	+	4.8	2	2	1.14737	0.198328	23.66	3	2.9	1	1	1.15005	0.201692	NaN	1	0	0	0	NaN		NaN	0
	2448	Tb927.4.2040	Tb927.4.2040	ALBA3	ALBA-Domain Protein (ALBA3)	20.808	63.2	0	190.1	1				0.201816	0.0407348	1.39003	+	63.2	13	7	1.21899	0.285689	27.017	30	47.4	13	7	1.1135	0.1551	51	27	47.4	10	5	1.1209	0.164658	16.598	25
	2734	Tb927.5.3450	Tb927.5.3450		hypothetical protein, conserved	57.992	49.5	0	129.45	1				0.217767	0.0121104	1.91684	+	43.6	15	15	1.15427	0.206978	26.775	30	46.5	16	16	1.13471	0.182328	21.815	26	16.5	7	7	1.2008	0.263996	18.022	11
	807	Tb927.10.2270	Tb927.10.2270		vacuolar protein sorting-associated protein 35, putative	104.36	7.5	0	13.844	1				0.219215	0.0173501	1.7607	+	5	3	3	1.11807	0.161008	7.1647	3	1.2	1	1	1.18356	0.24313	NaN	1	7.5	5	5	1.1921	0.253505	20.736	6
	396	Tb927.1.190	Tb927.1.190		retrotransposon hot spot protein (RHS, pseudogene), putative	94.659	26.9	0	11.344	1				0.225867	0.0254522	1.59428	+	18.9	15	3	1.2282	0.296545	13.316	3	25.4	17	3	1.15503	0.207928	19.46	4	20.7	14	2	1.1275	0.173128	10.758	2
	278	Tb927.11.3650;Tb11.v5.0435	Tb927.11.3650;Tb11.v5.0435		adenylosuccinate synthetase, putative;adenylosuccinate synthetase, putative	66.674	65	0	203.31	2				0.233602	0.0328927	1.4829	+	63	31	31	1.24867	0.320396	10.931	57	58.6	29	29	1.14376	0.193783	15.02	39	44.2	22	22	1.1381	0.186627	16.403	35
	657	Tb927.10.13980	Tb927.10.13980		hypothetical protein, conserved	23.575	21.8	0	12.261	1				0.234962	0.00379705	2.42055	+	18	3	3	1.19124	0.252467	39.555	4	21.8	4	4	1.18614	0.246276	4.6038	3	4.4	1	1	1.1536	0.206143	NaN	1
	2515	Tb927.4.3560;Tb927.4.3610	Tb927.4.3560;Tb927.4.3610		protein phoshatase 1, putative;protein phosphatase 1, putative	36.828	27.6	0	31.551	2			1	0.236608	0.0415399	1.38153	+	19	5	5	1.26223	0.335972	46.305	9	25.2	6	6	1.13389	0.18128	16.836	7	18.1	4	4	1.1428	0.192573	23.638	7
	2030	Tb927.2.2230	Tb927.2.2230		hypothetical protein, conserved	42.703	16.2	0	28.771	1			1	0.236873	0.0384586	1.41501	+	16.2	6	6	1.25834	0.331518	18.063	12	16	5	5	1.1501	0.201759	8.7389	8	11.6	3	3	1.1308	0.177344	15.439	5
	3937	Tb927.9.3400	Tb927.9.3400		endo-beta-N-acetylglucosaminidase, putative	115.9	21.1	0	31.125	1				0.237193	0.030752	1.51213	+	15.6	11	11	1.23145	0.30036	20.025	10	12.1	11	11	1.1934	0.255081	23.747	10	8.8	6	6	1.1143	0.156138	19.21	6
	981	Tb927.10.6070	Tb927.10.6070		universal minicircle sequence binding protein (UMSBP), putative,predicted zinc finger protein	14.566	63.6	0	123.02	1				0.238785	0.0395962	1.40235	+	63.6	7	6	1.11962	0.163009	3.9968	65	63.6	7	6	1.16708	0.222902	3.391	63	63.6	7	6	1.2574	0.330444	4.6948	44
	2089	Tb927.2.4540	Tb927.2.4540	TbSmB	Small nuclear ribonucleoprotein-associated protein B (snRNP-B) (Sm protein B) (Sm-B) (SmB), putative (TbSmB)	12.331	38.5	0	24.473	1				0.240731	0.0410417	1.38678	+	28.4	3	3	1.20562	0.269773	8.8673	6	22	2	2	1.23943	0.309681	16.04	2	20.2	2	2	1.104	0.14274	13.697	3
	2062	Tb927.2.3780	Tb927.2.3780		translation initiation factor IF-2, putative	94.472	42.7	0	252.76	1				0.241609	0.0180806	1.74279	+	42.7	29	29	1.22049	0.287466	26.494	58	38.7	26	26	1.19717	0.259634	33.244	52	31.3	21	21	1.1311	0.177727	33.82	39
	2796	Tb927.5.930;Tb11.v5.0613;Tb927.11.6730	Tb927.5.930;Tb11.v5.0613	FRDg	NADH-dependent fumarate reductase (FRDg);NADH-dependent fumarate reductase, putative	123.69	70	0	323.31	3				0.242924	0.0466127	1.3315	+	69.2	56	29	1.26767	0.342177	9.9864	68	68	55	28	1.17426	0.231752	7.8151	58	44.6	38	19	1.1133	0.154842	14.974	37
	1710	Tb927.11.4030	Tb927.11.4030		hypothetical protein, conserved	183.2	3.6	0	6.7893	1				0.248468	0.0220786	1.65603	+	2.7	3	3	1.24811	0.319748	10.498	3	2.7	3	3	1.14265	0.192381	8.4177	2	0.9	1	1	1.1755	0.233275	NaN	1
	711	Tb927.10.14790	Tb927.10.14790		aminopeptidase, putative,metallo-peptidase, Clan MG, Family M24	42.69	63.6	0	155.34	1				0.253671	0.0422396	1.37428	+	53.9	22	22	1.22205	0.289298	17.976	58	61.3	21	21	1.1079	0.147825	13.695	56	55.5	20	20	1.2517	0.323889	14.048	46
	3233	Tb927.7.5180;Tb927.7.5170	Tb927.7.5180;Tb927.7.5170		60S ribosomal protein L23a, putative;60S ribosomal protein L23a,60S ribosomal protein L25	18.17	56.1	0	222.76	2				0.253858	0.0237923	1.62356	+	56.1	12	12	1.21383	0.279564	21.337	44	48.8	11	11	1.12946	0.175631	9.2295	40	35.4	7	7	1.2366	0.306379	12.942	22
	2788	Tb927.5.800;Tb927.5.790;Tb927.3.1630	Tb927.5.800;Tb927.5.790	CK1.2	casein kinase I, isoform 2 (CK1.2);casein kinase I isoform 1 (CK1.1)	38.374	51.2	0	110.53	3			1	0.256376	0.0166451	1.77871	+	49.1	15	15	1.22276	0.290145	33.095	36	45.8	14	14	1.14028	0.189384	17.078	29	46.4	16	16	1.2223	0.289598	30.412	24
	1094	Tb927.10.8290;Tb927.10.8270;Tb11.v5.0877	Tb927.10.8290;Tb927.10.8270;Tb11.v5.0877		eukaryotic translation initiation factor 3 subunit 8, putative;eukaryotic translation initiation factor 3 subunit 8, putative;eukaryotic translation initiation factor 3 subunit 8, putative	84.339	56.1	0	323.31	3				0.258435	0.0204993	1.68826	+	53.1	26	26	1.23382	0.303134	24.923	59	51.8	26	26	1.13583	0.183753	15.294	51	35.7	20	20	1.2213	0.288418	36.684	32
	1007	Tb927.10.6780	Tb927.10.6780	VPS45	vacuolar protein sorting-associated protein 45, putative (VPS45)	64.974	26.8	0	29.655	1				0.260021	0.020339	1.69167	+	22.4	7	7	1.2611	0.33468	7.6776	8	14.8	5	5	1.15996	0.214073	9.1015	6	8.3	4	4	1.1739	0.23131	21.064	6
	976	Tb927.10.5940;Tb927.10.5930;Tb927.10.5950;Tb11.v5.0190	Tb927.10.5940;Tb927.10.5930;Tb927.10.5950;Tb11.v5.0190		protein kinase, putative;protein kinase, putative;protein kinase, putative;protein kinase, putative	55.11	49.6	0	91.034	4				0.260423	0.0283463	1.5475	+	45.1	18	18	1.25715	0.330157	11.401	22	45.7	17	17	1.13039	0.176821	12.051	19	31.2	13	13	1.2094	0.274292	28.18	18
	2996	Tb927.6.4800	Tb927.6.4800		hypothetical protein, conserved	46.376	41.1	0	45.591	1				0.262154	0.0405417	1.3921	+	41.1	12	12	1.20863	0.273378	13.679	15	19.9	6	6	1.27488	0.350357	12.185	8	17.9	5	5	1.1194	0.162726	24.274	9
	1276	Tb927.11.11590	Tb927.11.11590		eukaryotic translation initiation factor, putative	46.677	67.6	0	219.51	1				0.263131	0.0447394	1.34931	+	52.3	14	14	1.28525	0.362047	10.947	32	52.8	15	15	1.11923	0.162509	11.536	31	53.8	14	14	1.2015	0.264837	18.583	20
	643	Tb927.10.13730	Tb927.10.13730		60S ribosomal protein L7, putative	34.502	39.3	0	39.726	1				0.264135	0.0295177	1.52992	+	32.6	8	8	1.12906	0.175126	41.371	13	28.9	6	6	1.25829	0.331463	16.857	8	23.8	5	5	1.2191	0.285816	12.306	9
	2843	Tb927.6.1880	Tb927.6.1880		aspartyl-tRNA synthetase, putative	62.989	55	0	195.09	1				0.265776	0.0357369	1.44688	+	54.6	27	27	1.28541	0.362232	17.378	47	51.6	26	26	1.13728	0.185589	11.952	39	43.9	21	21	1.1888	0.249506	15.97	34
	533	Tb927.10.11390	Tb927.10.11390		60S ribosomal protein L6, putative	21.185	62.5	0	195.68	1				0.267387	0.0464569	1.33295	+	62.5	18	18	1.22414	0.291769	32.528	64	62.5	17	17	1.11258	0.153912	11.46	55	54.2	14	14	1.2803	0.356482	14.164	46
	212	Tb11.v5.0196;Tb927.10.6030	Tb11.v5.0196;Tb927.10.6030		hypothetical protein, conserved;proteasome alpha 1 subunit, putative,20S proteasome subunit alpha-6, (putative) (TbPSA6)	29.335	79.7	0	125.73	2				0.268301	0.0463264	1.33417	+	79.7	15	15	1.30058	0.379151	13.58	27	74.4	13	13	1.19084	0.251985	15.185	23	41.7	8	8	1.128	0.173767	21.943	12
	2947	Tb927.6.4000	Tb927.6.4000	SGT	small glutamine-rich tetratricopeptide repeat protein, putative (SGT)	45.966	69	0	191.27	1				0.269674	0.0494945	1.30544	+	61.1	18	18	1.1894	0.250234	9.4783	33	56.5	18	18	1.12721	0.17275	13.513	28	55.5	17	17	1.3068	0.386038	18.35	27
	2456	Tb927.4.2180	Tb927.4.2180		60S ribosomal protein L35a, putative	17.021	67.8	0	57.163	1				0.270493	0.0400728	1.39715	+	67.8	14	14	1.23088	0.299685	11.28	48	63.1	13	13	1.11926	0.162541	11.292	52	57	11	11	1.2739	0.349252	7.8167	36
	2870	Tb927.6.2340;Tb927.6.2280	Tb927.6.2340;Tb927.6.2280		hypothetical protein, conserved;hypothetical protein, conserved	16.282	41	0	48.226	2				0.271912	0.0155153	1.80924	+	41	5	5	1.25086	0.32292	11.578	7	25.9	3	3	1.15409	0.206762	10.025	5	41	5	5	1.2193	0.286053	13.992	7
	2172	Tb927.3.1680	Tb927.3.1680		hypothetical protein, conserved	35.191	56.6	0	114.59	1				0.273356	0.0408838	1.38845	+	49.4	13	13	1.2945	0.372393	30.389	24	53.8	13	13	1.12882	0.174817	28.541	31	46.2	11	11	1.2082	0.272859	61.615	19
	2687	Tb927.5.2570	Tb927.5.2570	EIF3B	translation initiation factor, putative (EIF3B)	79.81	69	0	191.23	1				0.273559	0.0386895	1.41241	+	65.5	34	34	1.27283	0.348041	16.455	56	55.2	26	26	1.12133	0.165208	16.568	49	46.4	23	23	1.2375	0.307428	12.135	38
	2229	Tb927.3.2750	Tb927.3.2750		hypothetical protein, conserved	95.98	18.8	0	57.274	1				0.278681	0.0413435	1.38359	+	15.7	7	7	1.14991	0.201526	21.443	7	18.8	9	9	1.18189	0.2411	26.364	9	7	4	4	1.3135	0.393416	18.769	5
	945	Tb927.10.5370;Tb927.10.5360	Tb927.10.5370;Tb927.10.5360		40S ribosomal protein S10, putative;40S ribosomal protein S10, putative	19.285	48.8	0	124.25	2				0.281362	0.0232679	1.63324	+	48.8	11	11	1.26005	0.33348	8.7758	30	48.8	11	11	1.14439	0.194575	13.145	33	38.4	7	7	1.2449	0.31603	5.2848	19
	3112	Tb927.7.2590	Tb927.7.2590		prefoldin, putative	18.777	54.1	0	117.58	1				0.281541	0.0386677	1.41265	+	34.1	3	3	1.19934	0.262244	12.621	4	34.1	3	3	1.30907	0.388544	8.1133	5	54.1	4	4	1.1438	0.193835	10.267	9
	616	Tb927.10.13180	Tb927.10.13180		hypothetical protein, conserved	136.67	31.3	0	127.71	1				0.28272	0.037015	1.43162	+	25.2	21	21	1.31296	0.392819	25.151	34	22.1	18	18	1.18516	0.245078	17.915	27	22.2	19	19	1.1569	0.210264	28.111	29
	2265	Tb927.3.3490	Tb927.3.3490	TDP1	high mobility group protein, putative (TDP1)	30.866	54.6	0	190.05	1				0.28391	0.0150719	1.82183	+	53.1	16	16	1.27449	0.349916	21.314	35	51.7	14	14	1.17237	0.229433	14.416	31	45.4	13	13	1.2078	0.272382	24.658	23
	1169	Tb927.10.9840	Tb927.10.9840		chaperone protein DNAj, putative	29.823	11.8	0	7.2081	1			1	0.285882	0.0329958	1.48154	+	4.6	1	1	1.30193	0.380653	NaN	1	8.4	2	2	1.14583	0.196393	NaN	1	11.8	3	3	1.2147	0.2806	20.046	2
	3870	Tb927.9.15150;Tb927.9.15110	Tb927.9.15150;Tb927.9.15110		unspecified product;unspecified product	34.636	48.1	0	141.34	2				0.287278	0.0458639	1.33853	+	48.1	14	14	1.22868	0.297112	25.433	52	48.1	14	14	1.12685	0.172295	10.007	51	40.6	11	11	1.3126	0.392427	28.227	31
	2532	Tb927.4.3920	Tb927.4.3920		hypothetical protein, conserved	121.77	3.4	0	14.115	1				0.288671	0.0454155	1.3428	+	1	1	1	1.21264	0.278146	NaN	1	1	1	1	1.32308	0.403904	NaN	1	2.4	2	2	1.136	0.183963	NaN	1
	1828	Tb927.11.6300	Tb927.11.6300		40S ribosomal protein S5, putative	21.386	55.8	0	243.54	1				0.29556	0.0243402	1.61367	+	55.8	10	10	1.30009	0.378607	8.1429	43	55.8	10	10	1.16151	0.215999	13.82	43	55.8	11	11	1.2244	0.292075	22.34	30
	3033	Tb927.7.1050;Tb927.7.1040	Tb927.7.1050;Tb927.7.1040		40S ribosomal protein S16, putative;40S ribosomal protein S16, putative	16.998	47.7	0	45.345	2				0.296948	0.0174942	1.7571	+	47.7	10	10	1.28621	0.363123	17.287	32	43	9	9	1.16922	0.225548	30.743	30	40.9	7	7	1.233	0.302173	8.2543	18
	2781	Tb927.5.600	Tb927.5.600		hypothetical protein, conserved	14.37	31.5	0	6.7475	1			1	0.297365	0.0375581	1.4253	+	31.5	3	3	1.16305	0.21791	20.208	4	14.2	2	2	1.19815	0.260809	11.393	3	14.2	2	2	1.3318	0.413377	19.302	3
	508	Tb927.10.1090;Tb927.10.1080	Tb927.10.1090;Tb927.10.1080	RPS23	40S ribosomal protein S23, putative (RPS23);40S ribosomal protein S23, putative (RPS23)	15.928	49	0	45.074	2			1	0.297403	0.0127709	1.89378	+	49	6	6	1.2262	0.29419	7.4501	25	49	6	6	1.18124	0.240299	8.2244	22	41.3	5	5	1.2814	0.357721	3.0641	25
	3139	Tb927.7.3090	Tb927.7.3090		hypothetical protein, conserved	111.96	7.5	0	9.6404	1				0.298336	0.0242243	1.61575	+	2.2	1	1	1.30349	0.382382	4.9365	2	1.7	1	1	1.22596	0.293907	NaN	1	3.6	3	3	1.1637	0.218719	29.05	4
	3563	Tb927.8.5320	Tb927.8.5320		hypothetical protein, conserved	15.121	32.3	0.0015924	2.522	1			1	0.298677	0.0368468	1.4336	+	32.3	3	3	1.24704	0.318506	41.34	3	9	1	1	1.13924	0.188069	NaN	1	9	1	1	1.3099	0.389457	NaN	1
	2528	Tb927.4.3840	Tb927.4.3840		nucleolar protein, putative	59.059	24.8	0	72.789	1				0.299875	0.0239482	1.62073	+	24.8	12	12	1.23827	0.308323	32.316	21	21	10	10	1.16	0.214123	20.731	16	17.7	8	8	1.2988	0.377179	43.741	15
	2877	Tb927.6.2460	Tb927.6.2460		ubiquitin fusion degradation protein 2, putative,ubiquitin conjugation factor E4 B, putative	112.63	10.5	0	43.602	1				0.30107	0.00846369	2.07244	+	8.1	6	6	1.20833	0.273012	23.49	8	6.6	5	5	1.20863	0.273378	22.184	9	6.6	5	5	1.2806	0.35682	18.482	11
	2076	Tb927.2.4210	Tb927.2.4210	PEPCK	glycosomal phosphoenolpyruvate carboxykinase (PEPCK)	58.564	76.6	0	323.31	1				0.303243	0.0331281	1.4798	+	76.6	39	39	1.20214	0.265605	7.8528	188	74.3	35	35	1.33287	0.414538	6.9758	182	68.4	34	34	1.1725	0.229588	11.091	126
	2444	Tb927.4.2000	Tb927.4.2000		ruvB-like DNA helicase, putative,ATP-dependent DNA helicase, putative	52.61	56.8	0	137.05	1				0.303768	0.0312278	1.50546	+	56.8	23	23	1.32414	0.40505	21.885	43	45.6	19	19	1.16156	0.216066	23.676	35	31	13	13	1.2228	0.290188	23.837	30
	584	Tb927.10.12590	Tb927.10.12590		hypothetical protein, conserved	105.85	7	0	21.689	1				0.3075	0.0216796	1.66395	+	7	4	4	1.31254	0.392364	9.266	4	5.3	3	3	1.17624	0.234177	1.2587	5	5.3	3	3	1.2277	0.295958	22.511	5
	2104	Tb927.2.4980	Tb927.2.4980		hypothetical protein, conserved	29.837	18.3	0	9.2004	1				0.309253	0.00245414	2.6101	+	10.4	3	3	1.23471	0.304166	1.2729	3	10.8	3	3	1.26401	0.338013	27.051	4	8.6	2	2	1.2189	0.28558	11.854	2
	2093	Tb927.2.4650	Tb927.2.4650		hypothetical protein, conserved	27.774	18.2	0	17.06	1				0.310437	0.0450788	1.34603	+	11.9	2	2	1.15495	0.207828	11.622	3	18.2	3	3	1.2174	0.283808	13.651	4	9.9	2	2	1.3563	0.439676	51.756	3
	3651	Tb927.8.6830	Tb927.8.6830		kinesin, putative	198.66	1.5	0	4.0615	1				0.313562	0.0195083	1.70978	+	1	2	2	1.20963	0.274564	21.303	2	0.4	1	1	1.32156	0.402245	NaN	1	0.4	1	1	1.2007	0.263876	NaN	1
	936	Tb927.10.5030;Tb927.7.3680	Tb927.10.5030;Tb927.7.3680		ubiquitin/ribosomal protein S27a, putative;ubiquitin/ribosomal protein S27a, putative	16.705	27.2	0	96.772	2				0.315264	0.0283202	1.5479	+	27.2	4	4	1.25981	0.333207	9.3532	28	27.2	4	4	1.15965	0.213688	3.6774	22	27.2	4	4	1.3185	0.398898	31.305	21
	3470	Tb927.8.3340	Tb927.8.3340		hypothetical protein, conserved	38.392	8.9	0	4.7895	1				0.315635	0.0277294	1.55706	+	4.3	1	1	1.2984	0.376732	NaN	1	4.3	1	1	1.15559	0.208628	NaN	1	4.6	1	1	1.2848	0.361544	NaN	1
	3612	Tb927.8.6160;Tb927.8.6150	Tb927.8.6160;Tb927.8.6150		40S ribosomal protein S8, putative;40S ribosomal protein S8, putative	24.937	39.5	0	59	2			1	0.316555	0.0452468	1.34441	+	39.1	7	7	1.36603	0.449986	20.229	23	39.1	7	7	1.21835	0.284933	12.567	19	39.5	8	8	1.1605	0.214747	19.758	18
	226	Tb927.10.5340;Tb927.10.5330;Tb11.v5.1060;Tb11.v5.0243	Tb927.10.5340;Tb927.10.5330;Tb11.v5.1060;Tb11.v5.0243	RPS18	40S ribosomal protein S18, putative (RPS18);40S ribosomal protein S18, putative;40S ribosomal protein S18, putative;40S ribosomal protein S18, putative	17.51	60.1	0	144.02	4				0.318561	0.021529	1.66698	+	60.1	13	13	1.32929	0.410658	15.041	36	60.1	13	13	1.19106	0.252243	7.7288	39	54.2	11	11	1.225	0.292782	20.51	36
	3955	Tb927.9.3990;Tb927.9.3920	Tb927.9.3990;Tb927.9.3920		ribosomal protein S7, putative;ribosomal protein S7, putative	23.841	55	0	171.44	2			1	0.319288	0.0139468	1.85553	+	55	14	14	1.31216	0.391948	7.1293	43	55	14	14	1.2	0.26304	9.2802	41	38.6	9	9	1.2336	0.302875	25.885	25
	1991	Tb927.11.9720	Tb927.11.9720		40S ribosomal protein S27, putative	9.6302	59.3	0	61.271	1				0.322674	0.0462394	1.33499	+	59.3	5	5	1.32008	0.400625	4.6087	28	59.3	5	5	1.13213	0.179041	1.1541	24	59.3	5	5	1.3089	0.388355	3.5075	16
	2786	Tb927.5.760	Tb927.5.760		cell cycle sequence binding phosphoprotein (RBP33), putative	79.048	20.5	0	64.546	1				0.323541	0.0310084	1.50852	+	18.9	8	8	1.26043	0.333916	8.1515	12	12.8	6	6	1.16289	0.217709	10.946	12	8.2	4	4	1.337	0.418999	22.815	4
	3187	Tb927.7.3900	Tb927.7.3900		vacuolar transporter chaperone, putative	19.768	6.1	0.00029044	3.6786	1				0.324366	0.00178147	2.74922	+	6.1	1	1	1.24726	0.318758	16.976	2	6.1	1	1	1.27492	0.350412	32.927	2	6.1	1	1	1.2345	0.303927	13.176	2
	171	Tb927.6.4980;Tb11.0390;Tb11.0290	Tb927.6.4980;Tb11.0390;Tb11.0290	RPS14	40S ribosomal protein S14 (RPS14);40S ribosomal protein S14, putative,chrXI additional, unordered contigs (RPS14);40S ribosomal protein S14, putative,chrXI additional, unordered contigs (RPS14)	15.513	66	0	218.94	3				0.32717	0.0328021	1.4841	+	66	10	10	1.36414	0.447997	16.733	38	60.4	9	9	1.19377	0.255529	4.0615	36	59.7	8	8	1.2125	0.277985	19.075	30
	1921	Tb927.11.8200	Tb927.11.8200		ribosomal protein S26, putative	12.806	49.5	0	31.843	1				0.329026	0.0232895	1.63284	+	49.5	7	7	1.25973	0.333116	5.2254	24	49.5	6	6	1.17979	0.238527	11.666	20	48.6	6	6	1.3337	0.415434	22.496	18
	859	Tb927.10.3150	Tb927.10.3150		N-acetyltransferase, putative	23.621	56.1	0	35.644	1				0.329943	0.0221454	1.65472	+	56.1	9	9	1.2852	0.361991	10.097	13	38	6	6	1.17447	0.232006	19.265	7	16.1	3	3	1.3157	0.395831	10.666	4
	2063	Tb927.2.380	Tb927.2.380		retrotransposon hot spot protein 2 (RHS2), putative	90.713	29.5	0	11.887	1			1	0.330176	0.0296721	1.52765	+	25.5	16	2	1.35173	0.434812	14.504	4	23.4	15	2	1.17592	0.233787	3.5703	3	25.2	16	2	1.25	0.321928	10.826	2
	497	Tb927.10.1060	Tb927.10.1060	TCP-1-delta	T-complex protein 1, delta subunit, putative (TCP-1-delta)	58.361	78.7	0	323.31	1				0.331077	0.0359892	1.44383	+	72.8	30	30	1.37423	0.458624	19.393	77	60.4	26	26	1.18909	0.249857	15.28	69	62.1	26	26	1.2182	0.284751	27.253	53
	1400	Tb927.11.14020;Tb927.11.14000	Tb927.11.14020;Tb927.11.14000	NRBD2	RNA-binding protein (NRBD2);NRBD1 (NRBD1)	30.274	46.6	0	159.22	2				0.332958	0.0182919	1.73774	+	46.6	16	16	1.33175	0.413326	12.644	66	46.6	16	16	1.19352	0.255219	17.388	64	46.2	15	15	1.2573	0.330329	8.2085	50
	1234	Tb927.11.10910;Tb927.11.10790	Tb927.11.10910;Tb927.11.10790		40S ribosomal protein SA, putative;40S ribosomal protein SA, putative	27.609	70.5	0	283.09	2				0.335161	0.0194182	1.71179	+	70.5	15	15	1.30825	0.387638	47.343	46	67.2	13	13	1.18145	0.240554	9.7452	40	42.2	10	10	1.2989	0.37729	20.432	26
	950	Tb927.10.5480;Tb927.10.5460	Tb927.10.5480;Tb927.10.5460		60S ribosomal protein L24, putative;60S ribosomal protein L24, putative	14.595	52	0	116.98	2				0.335606	0.0337589	1.47161	+	52	8	8	1.26693	0.341336	11.404	32	52	6	6	1.16737	0.223256	20.551	31	38.4	5	5	1.3587	0.442227	15.837	21
	2988	Tb927.6.4680	Tb927.6.4680		hypothetical protein, conserved	31.909	4.6	0.00055494	3.0094	1				0.336938	0.0417135	1.37972	+	4.6	1	1	1.1562	0.209395	12.903	2	4.6	1	1	1.37078	0.455	NaN	1	4.6	1	1	1.2714	0.346418	NaN	1
	2544	Tb927.4.430	Tb927.4.430		proteasome beta 7 subunit	24.409	82.1	0	76.881	1				0.338593	0.0184076	1.735	+	77.5	9	9	1.34706	0.429809	10.466	21	72.9	9	9	1.2392	0.309413	5.8282	18	53.2	7	7	1.2113	0.276556	12.699	13
	3025	Tb927.6.720;Tb927.11.11230	Tb927.6.720;Tb927.11.11230		40S ribosomal protein L14, putative;60S ribosomal protein L14, putative	21.443	34.9	0	123.62	2			1	0.339135	0.0440313	1.35624	+	34.9	11	11	1.35146	0.43452	10.647	32	34.9	9	9	1.14418	0.194311	6.1825	32	34.9	11	11	1.3091	0.388575	12.793	29
	2434	Tb927.4.1800;Tb927.4.1790	Tb927.4.1800;Tb927.4.1790		ribosomal protein L3, mitochondrial, putative;ribosomal protein L3, putative	48.691	56.9	0	323.31	2				0.340032	0.0499883	1.30113	+	56.9	28	28	1.31742	0.397714	15.12	118	56.4	27	27	1.13585	0.183769	10.078	108	52.9	21	21	1.3553	0.438612	12.52	80
	513	Tb927.10.10880	Tb927.10.10880	ABCF1	ATP-binding cassette protein, putative,ABC transporter, putative,ATPase, putative	77.697	46.9	0	155.53	1				0.340269	0.0164034	1.78506	+	43.9	19	19	1.34219	0.424591	25.572	34	37	16	16	1.21046	0.275559	21.388	28	33.3	13	13	1.2489	0.320658	52.982	22
	956	Tb927.8.1110;Tb927.10.5610	Tb927.8.1110;Tb927.10.5610		40S ribosomal protein S9, putative;40S ribosomal protein S9, putative	22.051	58.9	0	147.52	2				0.341506	0.0223102	1.6515	+	58.9	13	13	1.32188	0.402588	7.724	39	58.9	12	12	1.17962	0.238323	11.009	41	52.6	10	10	1.3046	0.383608	19.348	30
	2319	Tb927.3.4680	Tb927.3.4680		RAB GDP dissociation inhibitor alpha, putative	49.396	61.3	0	145.58	1				0.341808	0.0274279	1.56181	+	61.3	16	16	1.31614	0.396308	24.561	30	52.1	13	13	1.32212	0.402855	17.33	24	37.8	9	9	1.1698	0.226262	11.944	12
	2129	Tb927.2.5850	Tb927.2.5850	Sm-D2	small nuclear ribonucleoprotein SmD2 (Sm-D2)	12.518	36	0	12.175	1				0.342383	0.0432012	1.3645	+	36	4	4	1.37555	0.460012	44.621	4	24.3	3	3	1.28353	0.36012	13.985	4	21.6	2	2	1.1543	0.207018	26.774	3
	318	Tb11.v5.0624	Tb11.v5.0624		retrotransposon hot spot protein (PHS), putative	62.492	35.8	0	135.35	1			1	0.342965	0.0296931	1.52734	+	28.7	14	2	1.25103	0.323119	33.263	5	26.8	14	2	1.18888	0.249599	10.535	4	31.4	14	2	1.3719	0.456175	7.9442	3
	2437	Tb927.4.1860	Tb927.4.1860		ribosomal protein S19, putative	18.846	44.3	0	62.327	1				0.34299	0.0122911	1.91041	+	43.1	9	9	1.29169	0.369259	15.886	22	38.9	8	8	1.20363	0.267392	8.826	20	35.3	9	9	1.3125	0.392317	11.715	22
	1874	Tb927.11.7100	Tb927.11.7100		cytoplasmic translation machinery associated protein, putative	22.711	73.9	0	65.964	1				0.343347	0.0309257	1.50968	+	73.4	10	10	1.37749	0.462038	27.003	19	73.9	11	11	1.24316	0.314015	19.92	13	44.8	8	8	1.1925	0.253989	12.686	12
	580	Tb927.10.1250	Tb927.10.1250		hypothetical protein, conserved	29.381	52.5	0	54.208	1			1	0.343457	0.0328968	1.48285	+	48.7	9	9	1.38596	0.470889	24.095	15	45.6	8	8	1.20729	0.271775	19.593	17	37.2	6	6	1.2207	0.287709	17.167	9
	3787	Tb927.9.12150	Tb927.9.12150		transport protein particle (TRAPP) subunit, putative	23.01	10.4	0	18.825	1			1	0.344493	0.0127181	1.89558	+	6.4	1	1	1.20286	0.266472	28.165	2	10.4	2	2	1.31094	0.390604	13.268	3	6.4	1	1	1.2981	0.376402	NaN	1
	3099	Tb927.7.2340;Tb927.7.2370	Tb927.7.2340;Tb927.7.2370		40S ribosomal protein S15, putative;40S ribosomal protein S15, putative	17.474	59.9	0	125.24	2				0.345144	0.0313856	1.50327	+	59.9	9	9	1.34198	0.424359	11.717	35	59.2	8	8	1.16595	0.221505	9.5066	33	59.2	7	7	1.31	0.389567	21.846	23
	3217	Tb927.7.4420	Tb927.7.4420		proteasome alpha 3 subunit, putative	32.154	56.6	0	174.48	1				0.345396	0.0236207	1.62671	+	53.1	11	11	1.35988	0.443477	9.6453	21	46.9	9	9	1.26199	0.335699	7.8173	15	39.5	9	9	1.195	0.257011	22.615	16
	4105	Tb927.9.9670	Tb927.9.9670	TbPSA6	proteasome alpha 1 subunit, putative,20S proteasome subunit alpha-6, (putative) (TbPSA6)	27.543	57.2	0	89.826	1				0.345737	0.0174809	1.75744	+	53.6	10	10	1.33872	0.420858	11.326	20	52	9	9	1.19849	0.261223	15.684	19	42.8	7	7	1.2791	0.355129	29.813	14
	285	Tb927.10.15370;Tb11.v5.0480	Tb927.10.15370;Tb11.v5.0480	RPC40	RNA-binding protein RPC40, putative,DNA-directed RNA polymerase, alpha subunit, putative (RPC40);DNA-directed RNA polymerase, alpha subunit, putative	37.377	40.1	0	42.103	2			1	0.347592	0.0424416	1.37221	+	40.1	10	10	1.40445	0.49001	43.754	13	20.8	6	6	1.18231	0.241612	22.654	9	28.2	8	8	1.2407	0.311154	38.725	11
	3860	Tb927.9.14430	Tb927.9.14430		casein kinase II, putative	41.017	48.4	0	113.38	1				0.349579	0.0195556	1.70873	+	41.3	11	11	1.34189	0.424262	40.147	17	41.3	11	11	1.19387	0.255649	29.055	15	20.6	5	5	1.2913	0.368824	7.8944	8
	2033	Tb927.2.2390	Tb927.2.2390		hypothetical protein, conserved	16.796	33.5	0	19.977	1				0.349656	0.01325	1.87778	+	33.5	3	3	1.2045	0.268434	14.551	3	33.5	3	3	1.31358	0.393501	6.3298	3	7.5	1	1	1.3077	0.387032	8.9034	2
	1263	Tb927.11.11370;Tb927.11.11360	Tb927.11.11370;Tb927.11.11360	RACK1	receptor for activated C kinase 1 (RACK1);receptor for activated C kinase 1 (RACK1)	34.69	85.8	0	323.31	2				0.350393	0.0165152	1.78211	+	85.8	24	24	1.34546	0.4281	6.3018	97	83.3	23	23	1.20598	0.270208	6.3585	98	85.8	23	23	1.2771	0.352871	18.536	85
	368	Tb927.11.3600;Tb927.11.3590;Tb11.v5.1059	Tb927.11.3600;Tb927.11.3590;Tb11.v5.1059		40S ribosomal protein S4, putative;40S ribosomal protein S4, putative;40S ribosomal protein S4, putative	30.644	68.9	0	109.91	3			1	0.35222	0.0212536	1.67257	+	68.9	23	23	1.31484	0.394885	8.9323	82	68.9	23	23	1.18789	0.248399	15.605	73	64.5	21	21	1.3318	0.413377	10.178	60
	1780	Tb927.11.5400	Tb927.11.5400	SRP54	signal recognition particle 54 kDa (SRP54)	53.374	45.4	0	50.789	1				0.354127	0.0332235	1.47855	+	36.8	15	15	1.33115	0.412673	17.933	18	17	7	7	1.16634	0.221993	33.148	8	23.8	9	9	1.3451	0.427713	18.778	12
	2410	Tb927.4.1310	Tb927.4.1310	ZC3H9	ZFP family member, putative (ZC3H9)	47.401	5	0	4.4275	1				0.356305	0.0437713	1.35881	+	2.4	1	1	1.15693	0.210296	NaN	1	5	2	2	1.38727	0.472249	7.0306	2	2.4	1	1	1.3071	0.38637	NaN	1
	1816	Tb927.11.6140;Tb927.3.4360	Tb927.11.6140;Tb927.3.4360		40S ribosomal protein S15A, putative;40S ribosomal protein S15A, putative	14.645	53.1	0	70.178	2			1	0.356316	0.0256249	1.59134	+	53.1	6	6	1.3804	0.465082	6.487	25	53.1	6	6	1.20265	0.266212	6.38	22	44.6	5	5	1.2637	0.337654	5.0689	15
	809	Tb927.10.230	Tb927.10.230		proteasome alpha 5 subunit, putative,20S proteasome subunit alpha 5	27.176	72	0	139.96	1				0.356582	0.0141258	1.84999	+	72	13	13	1.35602	0.439383	6.7095	24	72	11	11	1.22785	0.296137	8.3936	23	54.1	10	10	1.2607	0.334225	10.584	19
	843	Tb927.10.290	Tb927.10.290		proteasome alpha 2 subunit, putative	25.354	67.1	0	89.767	1				0.357913	0.0115529	1.93731	+	63.6	9	9	1.35221	0.435319	11.388	23	66.7	10	10	1.25191	0.32413	15.28	22	42.4	8	8	1.2434	0.31429	41.655	15
	2758	Tb927.5.4030	Tb927.5.4030	TbLSm7	U6 snRNA-associated Sm-like protein LSm7p (TbLSm7)	10.214	19.6	0.00056818	3.2906	1				0.360608	0.0129298	1.88841	+	19.6	1	1	1.24828	0.319946	NaN	1	19.6	1	1	1.35982	0.443418	NaN	1	19.6	1	1	1.247	0.318461	NaN	1
	2751	Tb927.5.3850	Tb927.5.3850		hypothetical protein, conserved	98.121	7	0	8.3224	1				0.362974	0.0128299	1.89178	+	5.3	3	3	1.32844	0.409738	13.172	3	3.4	2	2	1.21434	0.280177	9.2709	2	1.7	1	1	1.3186	0.399007	NaN	1
	1884	Tb927.11.740	Tb927.11.740	eIF-5A	eukaryotic translation initiation factor 5a, putative (eIF-5A)	17.82	75.3	0	131.17	1				0.363478	0.0466131	1.33149	+	74.7	9	9	1.4324	0.518432	8.2674	30	75.3	11	11	1.25609	0.328942	16.453	33	57.2	8	8	1.1835	0.24306	6.052	21
	3766	Tb927.9.11310	Tb927.9.11310		unspecified product	27.402	41.6	0	44.729	1				0.363753	0.00635496	2.19689	+	34.1	6	6	1.33905	0.421206	7.5056	8	37.3	6	6	1.25404	0.326588	8.3843	9	30.6	5	5	1.2688	0.343465	10.469	7
	2206	Tb927.3.2220	Tb927.3.2220		hypothetical protein, conserved	23.8	35.9	0	41.01	1				0.364895	0.039264	1.406	+	31.4	4	4	1.42653	0.512514	4.2784	8	35	5	5	1.20861	0.273343	13.809	7	27.3	4	4	1.2387	0.308827	29.822	6
	193	Tb11.v5.0162;Tb927.7.4790	Tb11.v5.0162;Tb927.7.4790		proteasome beta 6 subunit;proteasome beta 6 subunit,20S proteasome beta 6 subunit, putative (BETA6)	28.705	50.8	0	50.023	2				0.36631	0.00197013	2.70551	+	50.8	9	9	1.28844	0.36563	11.255	16	42.6	7	7	1.3148	0.394847	11.967	12	28.7	5	5	1.2644	0.338453	8.399	11
	3824	Tb927.9.13340	Tb927.9.13340		hypothetical protein, conserved	35.95	18	0	14.673	1				0.367049	0.00434477	2.36203	+	14.1	4	4	1.2487	0.320432	14.199	4	12.2	3	3	1.32142	0.402092	6.0264	2	10.6	3	3	1.3001	0.378623	44.111	4
	803	Tb927.10.2210;Tb11.v5.0701	Tb927.10.2210		ubiquitin carboxyl-terminal hydrolase, putative,cysteine peptidase, Clan CA, family C19, putative	73.331	12.7	0	17.457	2				0.368524	0.049958	1.3014	+	10.7	5	5	1.43571	0.521763	15.47	6	3.8	2	2	1.16939	0.225751	4.7186	3	7.7	4	4	1.2817	0.358059	67.711	4
	874	Tb927.10.3500	Tb927.10.3500	RBSR4	RNA-binding protein, putative (RBSR4)	96.56	16.4	0	31.828	1				0.369922	0.0314313	1.50264	+	9.3	7	7	1.33901	0.421168	26.039	8	11.5	8	8	1.17833	0.236741	23.288	10	7.5	6	6	1.3678	0.451857	42.14	4
	537	Tb927.9.6070;Tb927.10.11540	Tb927.9.6070;Tb927.10.11540	RPS3	40S ribosomal protein S3, putative (RPS3);40S ribosomal protein S3, putative (RPS3)	24.216	61.2	0	105.86	2				0.372081	0.0182975	1.73761	+	61.2	14	14	1.35942	0.442987	13.65	39	57.5	13	13	1.20836	0.273047	8.9243	38	57.5	13	13	1.3197	0.40021	53.256	47
	1752	Tb927.11.4910	Tb927.11.4910		predicted ankyrin repeat family protein	43.647	57.7	0	90.456	1				0.373423	0.00905126	2.04329	+	50.8	12	12	1.34824	0.431073	24.337	26	36	10	10	1.23791	0.307912	15.032	26	29.6	7	7	1.3025	0.381283	36.015	16
	1121	Tb927.10.8880	Tb927.10.8880		hypothetical protein	64.024	7	0	11.966	1				0.37493	0.0321667	1.49259	+	7	3	3	1.40117	0.486631	27.462	3	5.3	2	2	1.3095	0.389017	21.452	2	7	3	3	1.1885	0.249142	44.317	3
	1869	Tb927.11.7020	Tb927.11.7020	PSA4	proteasome alpha 7 subunit, putative (PSA4)	27.865	70.9	0	119.36	1				0.375861	0.00605369	2.21798	+	68	13	13	1.34874	0.431618	17.858	24	61.1	11	11	1.28702	0.364032	13.103	18	40.9	10	10	1.2587	0.331934	24.219	13
	701	Tb927.10.14710;Tb927.10.14600	Tb927.10.14710;Tb927.10.14600	RPS2	40S ribosomal protein S2, putative (RPS2);40S ribosomal protein S2, putative (RPS2)	28.642	61.3	0	311.46	2				0.377402	0.0176043	1.75438	+	61.3	20	20	1.37629	0.460787	9.5729	72	61.3	20	20	1.21892	0.285601	8.4675	67	56.4	17	17	1.3066	0.385818	18.076	46
	2291	Tb927.3.3970	Tb927.3.3970		hypothetical Zinc-finger containing protein	32.553	23.6	0	70.14	1				0.378656	0.0307639	1.51196	+	23.6	6	6	1.40284	0.48835	3.3691	9	12.5	4	4	1.19268	0.254203	8.1805	6	14.8	3	3	1.3135	0.393416	5.2492	4
	3880	Tb927.9.15360	Tb927.9.15360		40S ribosomal protein S6, putative	28.476	41.2	0	75.667	1				0.380775	0.0417956	1.37887	+	41.2	13	5	1.37519	0.459635	13.157	20	41.2	13	5	1.16474	0.220009	1.2864	16	31.2	10	4	1.3781	0.462681	15.81	10
	2102	Tb927.2.4850	Tb927.2.4850		hypothetical protein, conserved	29.04	17.9	0	9.8219	1				0.381033	0.0438384	1.35814	+	13.1	3	3	1.34637	0.429071	23.538	4	10.3	2	2	1.16496	0.220278	18.178	4	13.9	3	3	1.4081	0.49375	7.0529	2
	827	Tb927.10.2580	Tb927.10.2580		hypothetical protein, conserved	33.249	8.2	0	4.6533	1				0.381053	0.0105439	1.977	+	4.4	1	1	1.33867	0.420801	NaN	1	4.4	1	1	1.233	0.302173	NaN	1	3.7	1	1	1.3381	0.420186	NaN	1
	955	Tb927.10.560	Tb927.10.560		40S ribosomal proteins S11, putative	20.087	50	0	21.408	1				0.381619	0.0441946	1.35463	+	49.4	11	1	1.45243	0.538471	8.4309	5	50	12	1	1.19426	0.256115	5.0649	6	48.3	9	1	1.2748	0.350271	13.987	6
	343	Tb927.10.3710;Tb11.v5.0761	Tb927.10.3710;Tb11.v5.0761	pa26	proteasome activator protein PA26;proteasome activator protein pa26, putative	25.258	50.6	0	111.07	2				0.382077	0.0435987	1.36053	+	45	8	8	1.44567	0.53174	9.8267	20	45.9	8	8	1.29004	0.367415	8.268	16	45.9	8	8	1.1868	0.247077	28.189	14
	2619	Tb927.5.1080	Tb927.5.1080	RBP22	RNA-binding protein, putative (RBP22)	26.869	17.3	0	16.851	1				0.383198	0.00308315	2.51101	+	17.3	3	3	1.33387	0.415615	21.295	6	17.3	3	3	1.26838	0.342982	43.386	5	11.8	2	2	1.3113	0.390998	47.843	3
	3169	Tb927.7.3530	Tb927.7.3530		hypothetical protein, conserved	77.548	1.7	0.0045872	1.9607	1				0.38329	0.00617701	2.20922	+	1.7	1	1	1.35661	0.440009	NaN	1	1.7	1	1	1.29525	0.373234	NaN	1	1.7	1	1	1.2628	0.336626	NaN	1
	951	Tb927.10.5520	Tb927.10.5520		hypothetical protein, conserved	36.138	28.2	0	19.105	1			1	0.383342	0.0236876	1.62548	+	13.6	3	3	1.40588	0.49147	22.066	5	24.5	5	5	1.29651	0.374636	9.9712	6	11.5	3	3	1.2175	0.283922	14.51	4
	728	Tb927.2.5910;Tb927.10.15120	Tb927.2.5910;Tb927.10.15120		40S ribosomal protein S13, putative;40S ribosomal protein S13, putative	17.309	50.3	0	17.522	2			1	0.384421	0.0386035	1.41337	+	50.3	12	12	1.32996	0.411387	24.08	22	37.1	9	9	1.17954	0.238221	7.2917	21	48.3	9	9	1.4178	0.503654	21.304	17
	2275	Tb927.3.3610	Tb927.3.3610	PEX7	peroxisomal targeting signal type 2 receptor, putative,peroxin 7 (PEX7)	39.734	39.9	0	25.654	1				0.385314	0.0195187	1.70955	+	36.3	8	8	1.40056	0.486004	32.858	16	33.2	8	8	1.22962	0.298211	10.137	11	12.5	3	3	1.2939	0.371726	7.9408	4
	2221	Tb927.3.2600	Tb927.3.2600		ATP-dependent DEAD/H RNA helicase, putative	244.99	46.2	0	323.31	1				0.38553	0.00616027	2.2104	+	36	57	57	1.36154	0.445244	20.883	104	36	56	56	1.27083	0.345766	20.175	91	32.7	55	55	1.2884	0.365581	29.949	91
	3863	Tb927.9.15000	Tb927.9.15000		hypothetical protein, conserved	27.214	42.2	0	43.255	1				0.388779	0.0424375	1.37225	+	42.2	8	8	1.46235	0.54829	14.719	13	37.5	7	7	1.20651	0.270834	12.812	9	3.2	1	1	1.2721	0.347212	10.871	2
	2797	Tb927.5.940	Tb927.5.940		NADH-dependent fumarate reductase, putative	87.388	55.7	0	42.763	1				0.389133	0.0183874	1.73548	+	55.7	34	8	1.39528	0.480559	9.5815	19	55.7	34	8	1.31184	0.391588	10.708	12	41.7	26	8	1.2271	0.295253	10.683	13
	3792	Tb927.9.12300	Tb927.9.12300		replication factor C, subunit 3, putative	39.624	25.8	0	21.018	1				0.395599	0.0338742	1.47013	+	25.8	6	6	1.41951	0.50539	72.006	7	23.2	5	5	1.34584	0.428508	47.269	6	7.6	2	2	1.1916	0.2529	7.5563	2
	1650	Tb927.11.3030	Tb927.11.3030	PRS	phosphoribosylpyrophosphate synthetase, putative (PRS)	39.402	50.8	0	180.17	1				0.397148	0.0122686	1.91121	+	48.9	10	10	1.39843	0.483803	25.108	24	50.8	11	11	1.26315	0.337029	15.568	24	28.7	7	7	1.2929	0.370611	18.152	12
	2484	Tb927.4.2750	Tb927.4.2750		hypothetical protein, conserved	31.517	21.7	0	22.087	1				0.400216	0.0267095	1.57333	+	17.1	4	4	1.44749	0.533556	23.837	5	7.4	2	2	1.26513	0.33929	3.8031	3	16.7	4	4	1.2551	0.327802	29.451	5
	2156	Tb927.3.1210	Tb927.3.1210	SEC24.1	protein transport protein Sec24 (SEC24.1)	108.19	11.1	0	10.675	1				0.401164	0.0325707	1.48717	+	9.2	6	6	1.45182	0.537864	80.347	9	3	3	3	1.21646	0.282684	7.8729	4	5.1	5	5	1.304	0.382944	68.988	6
	290	Tb927.10.3940;Tb11.v5.0501	Tb927.10.3940;Tb11.v5.0501		40S ribosomal protein S3A, putative;40S ribosomal protein S3A, putative	29.422	53.5	0	177.25	2				0.402319	0.0147391	1.83153	+	52.7	15	1	1.34378	0.426296	7.3423	3	53.5	16	1	1.23742	0.307341	10.291	3	52.7	14	1	1.3883	0.473319	5.3672	3
	3995	Tb927.9.5730	Tb927.9.5730		nucleosome assembly protein-like protein	47.584	54.7	0	197.66	1				0.413288	0.0333954	1.47631	+	54.5	21	21	1.4821	0.567639	10.228	58	52.8	20	20	1.25199	0.32422	12.868	52	54.5	20	20	1.2728	0.348006	38.839	45
	2425	Tb927.4.1630	Tb927.4.1630	RRP6	ribosomal RNA processing protein 6 (RRP6)	78.548	9.7	0	17.211	1				0.413761	0.0162754	1.78847	+	7.7	4	4	1.27885	0.354852	11.385	5	4.6	2	2	1.28876	0.365983	33.416	2	4.7	3	3	1.4344	0.520447	31.78	2
	2383	Tb927.3.780	Tb927.3.780	TbPSA7	proteasome alpha 7 subunit (TbPSA7)	25.463	59.9	0	111.21	1				0.416101	0.0183372	1.73667	+	48.1	9	9	1.444	0.530072	13.745	14	51.9	9	9	1.28901	0.366262	15.917	15	41.8	8	8	1.2763	0.351967	33.097	13
	182	Tb927.10.15270;Tb11.v5.0998;Tb11.1240	Tb927.10.15270;Tb11.v5.0998;Tb11.1240		methionine aminopeptidase, putative,metallo- peptidase, Clan MG, Family M24;methionine aminopeptidase, putative;hypothetical protein,chrXI additional, unordered contigs	43.784	59.7	0	179.77	3				0.416441	0.00890798	2.05022	+	55.2	13	13	1.4074	0.493033	12.981	22	48.1	11	11	1.28422	0.360897	8.3129	21	20.5	6	6	1.3153	0.395392	4.9083	7
	667	Tb927.10.14130	Tb927.10.14130		hypothetical protein, conserved	17.116	42.1	0	53.357	1				0.418033	0.0194618	1.71082	+	35.5	5	5	1.43166	0.517689	13.125	10	30.9	4	4	1.24219	0.312886	39.027	6	28.3	5	5	1.3412	0.423524	21.858	9
	390	Tb927.1.1700	Tb927.1.1700		hypothetical protein, conserved	55.093	20.7	0	20.464	1				0.421801	0.0274456	1.56153	+	18.9	6	6	1.37487	0.459298	10.76	10	8.9	3	3	1.43625	0.522302	18.516	6	7.1	3	3	1.2174	0.283803	5.257	2
	851	Tb927.10.3030;Tb927.10.2980	Tb927.10.3030;Tb927.10.2980	RPN11	proteasome regulatory non-ATPase subunit 11,19S proteasome regulatory subunit, Metallo-peptidase, Clan MP, Family M67 (RPN11);proteasome regulatory non-ATPase subunit 11,19S proteasome regulatory subunit, Metallo-peptidase, Clan MP, Family M67 (RPN11)	33.847	47.5	0	47.343	2				0.426499	0.0390193	1.40872	+	44.3	8	8	1.51144	0.595925	12.335	11	28.9	5	5	1.2388	0.308948	41.267	9	43.3	8	8	1.2965	0.374622	34.404	9
	2779	Tb927.5.580	Tb927.5.580		prefoldin subunit, putative	15.578	37	0	23.605	1				0.429244	0.0135023	1.86959	+	37	5	5	1.44361	0.529677	19.081	7	37	4	4	1.29396	0.371796	2.599	5	36.3	4	4	1.307	0.386259	68.633	6
	2364	Tb927.3.5540	Tb927.3.5540		dynein intermediate chain WDRD34, putative	58.074	10.5	0	14.038	1				0.431672	0.04097	1.38753	+	6.7	3	3	1.34793	0.430742	9.9292	5	2.6	1	1	1.50349	0.588313	NaN	1	5.6	3	3	1.2108	0.275961	10.153	3
	2646	Tb927.5.1660	Tb927.5.1660		protein phosphatase 2C, putative	46.85	49.4	0	111.02	1				0.433239	0.0150344	1.82291	+	26.4	9	9	1.38424	0.46909	28.404	18	37.2	11	11	1.25491	0.327584	10.472	20	32.7	13	13	1.4172	0.503043	22.554	23
	2360	Tb927.3.5490	Tb927.3.5490	PIFTB2	flagellar transport protein, putative (PIFTB2)	77.659	21.2	0	22.538	1				0.438599	0.0435065	1.36145	+	12.7	5	5	1.5337	0.617012	9.118	6	13.5	7	7	1.22677	0.294862	32.094	9	12	8	8	1.3231	0.403922	48.964	7
	3675	Tb927.8.730	Tb927.8.730		nucleolar RNA-binding protein, putative	28.338	11.1	0	10.486	1				0.440865	0.0306306	1.51384	+	11.1	3	3	1.51449	0.598828	1.3309	9	11.1	3	3	1.28621	0.363123	5.6843	9	5.1	1	1	1.284	0.360645	5.0843	4
	4022	Tb927.9.6870	Tb927.9.6870	RBSR1	RNA-binding protein, putative (RBSR1)	17.565	39.2	0	24.857	1				0.441433	0.0111613	1.95229	+	39.2	4	4	1.3541	0.43733	7.6287	8	39.2	4	4	1.2853	0.362102	9.0142	6	22.3	2	2	1.4388	0.524866	19.79	3
	3557	Tb927.8.5250	Tb927.8.5250		coatomer delta subunit, putative,delta-COP, putative,delta-coat protein, putative	57.33	22.8	0	30.064	1				0.443026	0.0293969	1.5317	+	16.8	6	6	1.47765	0.563305	19.246	8	20	7	7	1.38324	0.468052	16.89	10	11.5	4	4	1.2292	0.29772	6.4617	5
	565	Tb927.10.12210	Tb927.10.12210		ribulose-5-phosphate 3-epimerase, putative	26.397	21.5	0	12.426	1			1	0.44304	0.00483314	2.31577	+	21.5	3	3	1.3563	0.439676	14.951	4	5.7	1	1	1.36264	0.446403	10.725	4	0	0	0	NaN		NaN	0
	326	Tb11.v5.0670	Tb11.v5.0670		retrotransposon hot spot (RHS) protein, putative	34.014	68.9	0	16.141	1				0.447951	0.0361375	1.44204	+	68.9	13	1	1.53931	0.622288	5.196	2	68.9	13	1	1.27167	0.34672	10.664	2	39.9	8	1	1.2967	0.374845	12.278	2
	1149	Tb927.10.9430	Tb927.10.9430	PRS	phosphoribosylpyrophosphate synthetase, putative (PRS)	40.477	34.5	0	45.652	1				0.448175	0.0107793	1.96741	+	30.8	8	8	1.43534	0.521391	7.5129	16	32.6	8	8	1.37781	0.462376	8.7592	17	29.4	7	7	1.2841	0.360758	15.915	15
	1273	Tb927.11.11550	Tb927.11.11550		DNA topoisomerase II, putative	164.65	9.5	0	36.608	1				0.450319	0.0119494	1.92265	+	6.3	7	4	1.34858	0.431443	47.366	4	5.7	4	2	1.45824	0.544224	14.278	2	3.1	4	3	1.2971	0.37529	70.437	3
	1575	Tb927.11.1730	Tb927.11.1730		hypothetical protein	32.979	5.5	0	4.871	1				0.453343	0.0280607	1.5519	+	5.5	1	1	1.23848	0.308573	26.847	3	5.5	1	1	1.48874	0.57409	27.181	2	5.5	1	1	1.3922	0.477366	31.109	2
	1204	Tb927.11.10300	Tb927.11.10300		hypothetical protein, conserved	46.7	22.4	0	17.361	1				0.453599	0.0422928	1.37373	+	12.4	3	3	1.55941	0.640996	22.366	3	22.4	7	7	1.31851	0.398912	10.811	5	8.5	2	2	1.2491	0.320889	7.6697	2
	2713	Tb927.5.3120	Tb927.5.3120	EIF2B	eukaryotic translation initiation factor 2 beta subunit, putative	34.967	31.3	0	27.203	1				0.455407	0.0262509	1.58085	+	29.1	9	9	1.50621	0.590919	21.465	20	23.6	8	8	1.25775	0.330846	8.2742	17	18.2	6	6	1.3608	0.444455	3.3956	7
	1722	Tb927.11.440	Tb927.11.440		hypothetical protein, conserved	33.107	12.3	0	9.7772	1				0.455498	0.00909989	2.04096	+	6.5	2	2	1.32132	0.401978	17.914	3	12.3	4	4	1.34007	0.422308	10.842	5	6.5	2	2	1.4562	0.542209	19.851	3
	1331	Tb927.11.12680	Tb927.11.12680		prefoldin subunit 2, putative	15.902	69.7	0	42.587	1				0.455946	0.0197517	1.7044	+	69.7	8	8	1.50089	0.585821	37.722	18	69.7	8	8	1.31725	0.397524	17.906	16	51.7	7	7	1.3054	0.384492	19.099	15
	330	Tb927.10.2770;Tb11.v5.0684	Tb927.10.2770;Tb11.v5.0684		eukaryotic translation initiation factor 5, putative;eukaryotic translation initiation factor 5, putative	42.945	62	0	190.12	2				0.456383	0.0452875	1.34402	+	62	22	22	1.57057	0.651292	12.211	47	53.9	18	18	1.24479	0.315899	17.609	41	47.6	16	16	1.3213	0.401958	23.907	34
	3410	Tb927.8.2050	Tb927.8.2050		GDP-mannose pyrophosphorylase	40.704	19.5	0	36.01	1			1	0.458066	0.000465054	3.3325	+	16.8	4	4	1.35726	0.440694	3.703	7	14.1	3	3	1.38983	0.474913	3.0529	4	19.5	5	5	1.3742	0.458592	34.467	7
	561	Tb927.10.1210;Tb11.v5.0486	Tb927.10.1210		katanin, putative	75.358	26.9	0	30.834	2				0.460485	0.0303958	1.51719	+	19.9	9	9	1.53435	0.617631	25.878	9	13.4	7	7	1.34122	0.423546	22.122	8	11	6	6	1.266	0.340277	44.701	7
	2678	Tb927.5.2320	Tb927.5.2320		hypothetical protein, conserved	82.159	32.6	0	145.21	1				0.468602	0.0126836	1.89676	+	26.1	14	14	1.48637	0.571793	10.669	21	25.3	13	13	1.35665	0.440048	14.925	16	23.9	13	13	1.314	0.393965	51.186	18
	1165	Tb927.10.9800	Tb927.10.9800		60S ribosomal protein L22	15.271	29.2	0	23.84	1			1	0.468999	0.0491974	1.30806	+	23.8	3	1	1.60357	0.681284	22.857	4	23.1	3	1	1.2551	0.327801	3.5925	3	23.1	3	1	1.3176	0.397912	6.5624	2
	310	Tb11.v5.0588;Tb927.8.1410	Tb11.v5.0588;Tb927.8.1410		hypothetical protein, conserved;hypothetical protein, conserved	54.866	22	0	28.556	2			1	0.46911	0.0252477	1.59778	+	15.7	4	4	1.50455	0.589333	31.591	7	15.7	4	4	1.40396	0.489504	24.984	5	17.1	5	5	1.2557	0.328492	46.059	5
	758	Tb927.10.15720	Tb927.10.15720	RPN9	proteasome regulatory non-ATP-ase subunit 9,19S proteasome regulatory subunit (RPN9)	45.989	40	0	98.109	1				0.471461	0.0413918	1.38309	+	40	13	13	1.54768	0.630104	19.265	23	35.6	11	11	1.40913	0.4948	17.94	22	33.3	11	11	1.2222	0.28948	12.322	15
	980	Tb927.10.6050;Tb11.v5.0197;Tb11.v5.0198	Tb927.10.6050;Tb11.v5.0197	CHC	clathrin heavy chain (CHC);clathrin heavy chain, putative	190.62	59.6	0	323.31	3				0.474818	0.0243797	1.61297	+	56	63	63	1.44032	0.52639	21.309	107	50.1	55	55	1.48657	0.571986	29.163	96	35.6	44	44	1.2536	0.326077	22.558	66
	1239	Tb927.11.10860	Tb927.11.10860		hypothetical protein, conserved	47.301	45.8	0	50.569	1				0.478672	0.0238645	1.62225	+	38.2	10	10	1.5324	0.615795	52.299	19	42.8	12	12	1.28003	0.356181	24.005	18	19.9	6	6	1.3794	0.464041	39.616	9
	423	Tb927.1.3170	Tb927.1.3170		hypothetical protein, conserved	34.259	25.6	0	31.322	1				0.483553	0.0496285	1.30427	+	25.2	7	7	1.5635	0.644781	41.732	7	16.7	5	5	1.4514	0.537445	0.3254	6	12.8	3	3	1.2045	0.268434	14.003	3
	830	Tb927.10.2640;Tb11.v5.0525	Tb927.10.2640		intraflagellar transport protein IFT81, putative	84.645	30.9	0	46.943	2				0.486131	0.0316813	1.4992	+	16.5	10	10	1.56038	0.641896	11	11	13.4	7	7	1.39628	0.481586	5.5016	9	17.3	10	10	1.2613	0.334911	32.309	11
	3545	Tb927.8.5040	Tb927.8.5040		hypothetical protein, conserved	31.11	21.6	0	31.347	1			1	0.486874	0.0447486	1.34922	+	18	3	3	1.43852	0.524583	16.681	5	18	3	3	1.2195	0.286287	19.433	3	3.6	1	1	1.5689	0.649753	NaN	1
	1978	Tb927.11.9550	Tb927.11.9550		replication factor C, subunit 4, putative	37.586	41.3	0	56.608	1				0.487617	0.0351803	1.4537	+	36.4	8	8	1.54878	0.631131	49.386	10	21.7	4	4	1.43486	0.520914	19.176	5	29	6	6	1.2404	0.310805	9.7594	9
	2218	Tb927.3.2440	Tb927.3.2440		serine/threonine-protein kinase, putative,protein kinase, putative	45.811	29.8	0	103.2	1				0.49016	0.0434545	1.36197	+	17	5	5	1.57136	0.652017	18.874	9	21.2	6	6	1.22399	0.291592	19.272	9	22.2	6	6	1.4408	0.52687	4.4271	7
	557	Tb927.10.12030	Tb927.10.12030		hypothetical protein, conserved	27.19	33.6	0	39.214	1			1	0.494974	0.0277834	1.55621	+	33.6	5	5	1.54555	0.628118	5.8588	12	23.6	3	3	1.43186	0.517895	10.595	9	28.4	5	5	1.2648	0.338909	64.464	17
	2942	Tb927.6.3890	Tb927.6.3890		replication factor C, subunit 2, putative	38.809	21	0	46.433	1				0.495226	0.0478892	1.31976	+	21	5	5	1.59076	0.669717	82.502	5	10.7	2	2	1.21849	0.285091	32.964	3	5.5	1	1	1.4448	0.53087	NaN	1
	316	Tb927.7.7070;Tb11.v5.0612	Tb927.7.7070;Tb11.v5.0612		hypothetical protein, conserved;hypothetical protein, conserved	49.45	19.4	0	15.483	2				0.498194	0.0404269	1.39333	+	9.7	4	4	1.5935	0.672198	37.059	4	9.7	4	4	1.42183	0.507747	14.745	4	14.9	4	4	1.2437	0.314639	21.997	3
	3564	Tb927.8.5330	Tb927.8.5330		tyrosyl/methionyl-tRNA synthetase, putative	24.204	53.4	0	49.315	1				0.502391	0.0206069	1.68599	+	48	9	9	1.56304	0.644352	10.523	12	50.2	9	9	1.31954	0.400035	13.061	11	43	8	8	1.3782	0.462785	32.232	16
	1901	Tb927.11.7850	Tb927.11.7850		hypothetical protein, conserved	19.449	6.4	0	3.7811	1				0.505551	0.0407271	1.39012	+	6.4	1	1	1.62211	0.697874	NaN	1	6.4	1	1	1.26156	0.335208	NaN	1	6.4	1	1	1.3982	0.483571	NaN	1
	2780	Tb927.5.590	Tb927.5.590		protein phosphatase 1, regulatory subunit, putative	45.74	16.9	0	18.931	1				0.507594	0.0347663	1.45884	+	12.7	3	3	1.5178	0.601978	16.614	2	10.4	3	3	1.24248	0.313226	5.6915	3	4.2	1	1	1.5237	0.607579	NaN	1
	2747	Tb927.5.3800	Tb927.5.3800		glutamine hydrolysing (not ammonia-dependent) carbomoyl phosphate synthase, putative	204.09	64.2	0	323.31	1				0.508165	0.0454221	1.34273	+	57.2	71	71	1.63663	0.710732	17.372	148	53.1	68	68	1.40477	0.490335	14.88	132	45.3	56	56	1.2513	0.323428	21.646	103
	388	Tb927.1.1670;Tb11.v5.0887	Tb927.1.1670;Tb11.v5.0887		hypothetical protein, conserved;hypothetical protein, conserved	120.87	36.2	0	118.02	2				0.50991	0.0482664	1.31635	+	27.7	21	21	1.63712	0.711157	20.798	34	26	20	20	1.42426	0.510211	36.52	24	16	14	14	1.2383	0.308361	8.6781	17
	261	Tb927.1.1240;Tb11.v5.0356	Tb927.1.1240;Tb11.v5.0356		cytidine triphosphate synthase, putative;cytidine triphosphate synthase, putative	65.212	47.4	0	121.25	2				0.510562	0.0301143	1.52123	+	46	19	19	1.6135	0.690195	27.262	26	26.3	11	11	1.31893	0.399369	15.96	20	24.4	11	11	1.3586	0.442121	41.336	14
	3486	Tb927.8.3710	Tb927.8.3710		hypothetical protein, conserved	84.503	12.7	0	7.2688	1			1	0.515139	0.0230964	1.63646	+	2	1	1	1.52068	0.604718	7.1405	2	4.8	2	2	1.28007	0.356218	53.691	3	9.9	3	3	1.4995	0.584482	13.917	2
	3840	Tb927.9.13970	Tb927.9.13970		hypothetical protein, conserved	36.788	38.1	0	54.011	1				0.519216	0.0359182	1.44469	+	38.1	7	7	1.63457	0.708915	16.48	10	32.4	6	6	1.28655	0.363512	10.433	9	20.9	4	4	1.3998	0.485221	7.2603	5
	1516	Tb927.11.16130	Tb927.11.16130	NDPK	nucleoside diphosphate kinase (NDPK)	16.857	83	0	158.41	1				0.519518	0.00171219	2.76645	+	83	11	11	1.47462	0.560345	8.3001	79	83	11	11	1.42497	0.51093	9.4321	86	59.5	10	10	1.4018	0.487281	3.2462	68
	2715	Tb927.5.3170	Tb927.5.3170	PRPS5	ribose-phosphate pyrophosphokinase, putative (PRPS5)	39.188	47.6	0	76.376	1				0.52658	0.0365534	1.43707	+	47.6	12	12	1.64322	0.716529	24.323	14	34.2	8	8	1.41717	0.503016	22.201	12	31.4	8	8	1.2836	0.360196	79.697	12
	2411	Tb927.4.1330	Tb927.4.1330		DNA topoisomerase IB, large subunit	79.257	35.9	0	71.366	1				0.527639	0.0377026	1.42363	+	29.6	14	14	1.58023	0.660133	44.685	20	27.7	13	13	1.51941	0.603512	18.935	17	22	12	12	1.2477	0.319271	42.668	11
	1358	Tb927.11.13300	Tb927.11.13300		hypothetical protein, conserved	16.922	16	0	5.1185	1				0.53025	0.0478151	1.32044	+	7.1	1	1	1.50857	0.59318	NaN	1	16	2	2	1.22915	0.297662	NaN	1	9	1	1	1.6244	0.699907	NaN	1
	2235	Tb927.3.2900	Tb927.3.2900		eukaryotic initiation factor 2a, putative	46.824	58.6	0	141.59	1				0.533677	0.0377134	1.4235	+	58.6	20	20	1.66764	0.737807	16.675	43	53.3	17	17	1.39995	0.485378	14.647	36	57.9	20	20	1.2994	0.377846	27.982	34
	1210	Tb927.11.1040	Tb927.11.1040		hypothetical protein, conserved	57.048	2.1	0.0013729	2.885	1				0.538974	0.0462985	1.33443	+	2.1	1	1	1.41393	0.499708	NaN	1	2.1	1	1	1.49303	0.578241	NaN	1	0	0	0	NaN		NaN	0
	4088	Tb927.9.9090	Tb927.9.9090		hypothetical protein, conserved	40.634	11.9	0	8.8201	1			1	0.540205	0.00367141	2.43517	+	9.4	2	2	1.45104	0.537089	38.213	2	2.5	1	1	1.45732	0.54332	NaN	1	0	0	0	NaN		NaN	0
	1754	Tb927.11.4950	Tb927.11.4950		hypothetical protein, conserved	88.74	20.2	0	32.603	1				0.548858	0.0329868	1.48166	+	17	10	10	1.66917	0.739131	24.68	11	17.4	10	10	1.4325	0.518536	24.98	11	10.4	6	6	1.3094	0.388906	17.669	10
	1353	Tb927.11.13250	Tb927.11.13250	eIF-2-gamma	eukaryotic translation initiation factor 2 gamma, putative (eIF-2-gamma)	52.2	58.9	0	323.31	1				0.549662	0.029704	1.52719	+	58.7	18	18	1.6742	0.743472	23.673	46	55.3	17	17	1.36921	0.45334	23.504	43	43.6	14	14	1.3681	0.452174	9.7214	21
	591	Tb927.10.12710	Tb927.10.12710		heat shock protein 110, putative	90.863	68.6	0	323.31	1				0.552582	0.0400674	1.39721	+	67.1	41	41	1.71765	0.780438	38.716	101	63.9	39	39	1.34624	0.428935	41.023	83	54.5	36	36	1.3645	0.448372	41.396	75
	1014	Tb927.10.6970;Tb927.10.6940	Tb927.10.6970;Tb927.10.6940		dipeptidyl-peptidase 8-like serine peptidase,serine peptidase, Clan SC, Family S9B;Dipeptidyl-peptidase 8-like, putative	93.683	16.2	0	71.616	2				0.553535	0.047958	1.31914	+	13.8	6	6	1.6675	0.737687	14.759	15	11.6	5	5	1.52616	0.609905	36.38	11	10.1	4	4	1.2423	0.313014	15.946	7
	1671	Tb927.11.3370	Tb927.11.3370		hypothetical protein	21.725	13.4	0	9.9608	1				0.554467	0.00666015	2.17652	+	13.4	2	2	1.56411	0.645345	17.951	3	13.4	2	2	1.42629	0.512267	16.754	3	13.4	2	2	1.4199	0.505789	51.429	3
	1758	Tb927.11.5020	Tb927.11.5020		hypothetical protein, conserved	186.51	7.4	0	20.746	1			1	0.563193	0.00213189	2.67124	+	5	6	6	1.50693	0.591614	35.149	5	2.6	4	4	1.42521	0.511176	13.734	5	1.9	2	2	1.5019	0.586789	16.139	2
	738	Tb927.10.15310;REV__Tb927.10.2600	Tb927.10.15310		hypothetical protein, conserved	47.654	10	0	9.0515	2				0.565101	0.0194307	1.71151	+	7.3	3	3	1.4445	0.530572	8.9443	5	7.3	3	3	1.36336	0.447171	8.8542	5	5.3	2	2	1.6444	0.717561	6.5229	2
	3467	Tb927.8.3280	Tb927.8.3280		hypothetical protein, conserved	40.253	4.1	0.009879	1.5635	1				0.568159	0.0212146	1.67337	+	4.1	1	1	1.50222	0.587099	NaN	1	4.1	1	1	1.46329	0.549219	7.8865	2	0	0	0	NaN		NaN	0
	3339	Tb927.7.7470;Tb927.4.3750	Tb927.7.7470		receptor-type adenylate cyclase GRESAG 4, putative	132.9	12.2	0	67.123	2				0.580466	0.0438532	1.358	+	9.6	8	5	1.42564	0.511608	4.4299	10	7.8	7	4	1.77073	0.824341	2.6971	9	5.9	6	4	1.3245	0.405448	5.543	10
	1782	Tb927.11.5440	Tb927.11.5440		malic enzyme	61.506	59.2	0	152.88	1				0.581498	0.0187126	1.72786	+	53	19	19	1.63287	0.707407	41.358	40	43.8	17	17	1.52198	0.605947	12.327	33	32.6	14	14	1.3483	0.431142	15.714	23
	1370	Tb927.11.13540	Tb927.11.13540		hypothetical protein, conserved	54.96	4.6	0	4.1039	1				0.586557	0.0217051	1.66344	+	2	1	1	1.67628	0.745261	21.601	2	2	1	1	1.4871	0.572501	37.615	2	4.6	2	2	1.3584	0.441908	15.657	2
	367	Tb927.10.12040;Tb11.v5.1057	Tb927.10.12040;Tb11.v5.1057		protein kinase, putative,mitogen-activated protein kinase 11, putative;protein kinase, putative	47.389	16	0	10.074	2				0.640656	0.0301773	1.52032	+	9.9	2	2	1.74487	0.803116	13.772	2	7.5	1	1	1.33901	0.421168	NaN	1	6.1	2	2	1.6219	0.697685	31.047	2
	2555	Tb927.4.4550;Tb927.8.7780	Tb927.4.4550;Tb927.8.7780		hypothetical protein, conserved;hypothetical protein, conserved	92.148	3	0	19.044	2			1	0.642094	0.0349964	1.45598	+	3	2	2	1.77516	0.827948	24.271	2	3	2	2	1.32739	0.408589	11.189	2	1.6	1	1	1.613	0.689746	NaN	1
	1717	Tb927.11.4210	Tb927.11.4210		hypothetical protein, conserved	69.793	24.1	0	34.672	1				0.650429	0.0197676	1.70405	+	19.7	10	10	1.69431	0.7607	49.262	13	11.6	7	7	1.38122	0.465939	14.829	7	9.8	5	5	1.6525	0.72465	29.131	4
	2485	Tb927.4.2760	Tb927.4.2760		hypothetical protein, conserved	75.492	5.4	0	9.5966	1				0.653829	0.0168173	1.77424	+	3.4	1	1	1.56384	0.645096	NaN	1	3.4	1	1	1.74926	0.806745	NaN	1	5.4	2	2	1.4237	0.509645	25.636	2
	754	Tb927.10.15640	Tb927.10.15640		hypothetical protein, conserved	73.508	11.6	0	18.021	1				0.685451	0.0378042	1.42246	+	8.5	4	4	1.94507	0.959823	31.963	6	3	2	2	1.46516	0.551057	0.75699	4	6.1	4	4	1.4595	0.545474	19.636	5
	1073	Tb927.10.7990	Tb927.10.7990		replication factor C, subunit 5, putative,ATPase, putative	38.734	18.9	0	16.247	1				0.699727	0.0470141	1.32777	+	18.9	4	4	1.7507	0.807932	18.197	5	12.9	3	3	1.31017	0.389754	29.575	5	8	2	2	1.868	0.901494	35.331	4
	1481	Tb927.11.15520	Tb927.11.15520		hypothetical protein, conserved	83.179	2.2	0.0015831	2.4607	1			1	0.737905	0.0492098	1.30795	+	2.2	1	1	1.60298	0.680752	58.972	2	2.2	1	1	1.73515	0.795058	NaN	1	0	0	0	NaN		NaN	0
	1282	Tb927.11.11700	Tb927.11.11700		hypothetical protein, conserved	63.371	26.2	0	35.574	1				0.746236	0.0357488	1.44674	+	26.2	8	8	2.00566	1.00407	33.41	15	21.5	6	6	1.41649	0.502321	12.567	9	7.2	2	2	1.6613	0.732313	10.629	3
	1527	Tb927.11.16340	Tb927.11.16340		hypothetical protein, conserved	124.85	7.4	0	18.206	1				0.747651	0.010673	1.97172	+	7.4	5	5	1.69371	0.760186	20.11	5	2.9	2	2	1.66453	0.735115	20.6	2	0	0	0	NaN		NaN	0
	1478	Tb927.11.15480	Tb927.11.15480		heat shock protein Hsp20, putative	23.085	34.1	0	24.268	1				0.762327	0.0410104	1.38711	+	34.1	6	6	2.1089	1.07649	28.722	8	34.1	6	6	1.57062	0.651337	37.317	9	22.6	3	3	1.4734	0.559149	69.637	4
	2243	Tb927.3.3060	Tb927.3.3060		hypothetical protein, conserved	32.297	8.6	0.0016056	2.6031	1				0.769637	0.0091336	2.03936	+	6.2	1	1	1.65374	0.725732	NaN	1	6.2	1	1	1.59005	0.669074	NaN	1	8.6	2	2	1.8844	0.914105	17.621	2
	2813	Tb927.6.1280	Tb927.6.1280		translation initiation factor EIF-2b alpha subunit, putative,eIF-2B GDP-GTP exchange factor	33.095	29.1	0	32.268	1				0.773855	0.0373622	1.42757	+	16.4	4	4	1.74107	0.799973	18.094	8	29.1	6	6	1.40946	0.495146	8.2958	6	11.4	3	3	2.037	1.02645	27.351	3
	2887	Tb927.6.2650	Tb927.6.2650		hypothetical protein, conserved	84.541	3.7	0	4.1674	1				0.787634	0.0364217	1.43864	+	0	0	0	NaN		NaN	0	1.2	1	1	1.78107	0.832745	39.035	2	3.7	2	2	1.6731	0.742524	37.122	2
	3476	Tb927.8.3930;Tb927.8.3490	Tb927.8.3930;Tb927.8.3490		hypothetical protein, conserved;hypothetical protein, conserved	72.162	2	0.0016017	2.5736	2				0.813018	0.0222183	1.65329	+	2	1	1	1.79179	0.841405	NaN	1	2	1	1	1.72265	0.784632	NaN	1	0	0	0	NaN		NaN	0
	339	Tb11.v5.0739;Tb927.7.7000	Tb11.v5.0739;Tb927.7.7000		hypothetical protein, conserved;hypothetical protein, conserved	84.657	5	0.0005607	3.1218	2				0.822611	0.0275524	1.55984	+	5	2	2	1.63806	0.711984	20.187	3	2.2	1	1	1.57594	0.656217	NaN	1	2.2	1	1	2.143	1.09963	13.343	2
	4023	Tb927.9.6880	Tb927.9.6880		cAMP-specific phosphodiesterase, putative	72.857	2.6	0.0005618	3.1436	1				0.822888	0.0270201	1.56831	+	2.6	1	1	1.72661	0.787941	NaN	1	2.6	1	1	1.81232	0.857835	9.1928	2	0	0	0	NaN		NaN	0
	2115	Tb927.2.5160	Tb927.2.5160		chaperone protein DNAj, putative	44.327	66.5	0	323.31	1				0.861842	0.0489647	1.31012	+	66.5	21	21	2.36167	1.2398	14.928	65	60	19	19	1.48474	0.570207	15.933	49	49.2	17	17	1.7118	0.775514	67.448	44
	3295	Tb927.7.660	Tb927.7.660		hypothetical protein, conserved	52.795	10.5	0.0016004	2.5675	1				0.868711	0.0478872	1.31978	+	10.5	2	2	1.9108	0.93418	5.2482	3	10.5	2	2	1.74502	0.803242	17.34	2	0	0	0	NaN		NaN	0
	299	Tb927.10.10960;Tb927.10.10950;Tb927.10.10940;Tb927.10.10920;Tb927.10.10900;Tb927.10.10890;Tb11.v5.0543;Tb927.10.10910;Tb927.10.10980;Tb927.10.10970;Tb927.10.10930	Tb927.10.10960;Tb927.10.10950;Tb927.10.10940;Tb927.10.10920;Tb927.10.10900;Tb927.10.10890;Tb11.v5.0543;Tb927.10.10910;Tb927.10.10980;Tb927.10.10970;Tb927.10.10930		heat shock protein, putative;heat shock protein, putative;heat shock protein, putative;heat shock protein, putative;heat shock protein, putative;heat shock protein, putative;Heat shock protein 83, putative;heat shock protein, putative;heat shock pr	80.763	69.3	0	323.31	11				0.87174	0.030017	1.52263	+	68.2	57	57	2.26454	1.17922	17.178	292	67.2	53	53	1.67608	0.745092	12.85	250	63.2	53	53	1.6143	0.690909	43.21	218
	2705	Tb927.5.2940	Tb927.5.2940		stress-induced protein sti1, putative	62.327	76.7	0	323.31	1				0.875128	0.0279995	1.55285	+	74.9	40	40	2.24351	1.16576	34.329	91	66.9	35	35	1.58917	0.668272	40.699	71	66.4	35	35	1.7307	0.791356	33.477	73
	3216	Tb927.7.4390	Tb927.7.4390		threonine synthase, putative	73.873	38.7	0	57.531	1				0.904354	0.0478065	1.32051	+	28.6	13	13	2.40298	1.26482	105.8	17	23.1	10	10	1.85818	0.893893	20.18	12	15.9	8	8	1.4685	0.554343	19.362	8
	383	Tb927.1.1530	Tb927.1.1530		protein kinase, putative	191.48	0.9	0.001603	2.5831	1				0.950798	0.0216497	1.66455	+	0.9	1	1	2.19015	1.13103	NaN	1	0.9	1	1	2.07232	1.05125	NaN	1	0.9	1	1	1.5912	0.670115	NaN	1
	1549	Tb927.11.16660	Tb927.11.16660		hypothetical protein, conserved	234.41	2.2	0	9.6556	1				0.974818	0.0145978	1.83571	+	2.2	3	3	1.99609	0.997175	27.637	3	1.7	2	2	1.93517	0.952462	42.932	2	0	0	0	NaN		NaN	0
	767	Tb927.10.16100;Tb11.v5.0411	Tb927.10.16100;Tb11.v5.0411		FK506-binding protein (FKBP)-type peptidyl-prolyl isomerase, putative;peptidylprolyl isomerase-like protein, putative	47.604	54.4	0	196.64	2				1.0296	0.0436925	1.35959	+	54.4	14	14	2.77685	1.47345	13.363	35	50.4	13	13	1.78638	0.837042	10.954	31	40.7	11	11	1.7151	0.778293	56.611	23
	147	Tb927.7.2140;Tb07.11L3.90	Tb927.7.2140;Tb07.11L3.90	ZC3H18	hypothetical protein,zinc finger protein family member, putative (ZC3H18);zinc finger protein family member, putative (ZC3H18)	40.864	42.8	0	47.295	2				1.08628	0.0431652	1.36487	+	36.2	6	6	2.84665	1.50927	45.422	8	30.9	4	4	2.06394	1.0454	41.157	5	12.8	3	3	1.6292	0.704164	21.849	4
	2024	Tb927.2.2120	Tb927.2.2120		protein kinase, putative,NIMA/Nek Serine/threonine-protein kinase family, putative	50.602	11.9	0	7.0745	1			1	1.13528	0.0348737	1.4575	+	7.9	3	3	2.29347	1.19753	15.302	2	6.8	2	2	2.10385	1.07303	24.566	3	0	0	0	NaN		NaN	0
	631	Tb927.11.9710;Tb927.10.13500	Tb927.11.9710;Tb927.10.13500	RPL10A	60S ribosomal protein L10a, putative (RPL10A);60S ribosomal protein L10a	24.597	73.8	0	323.31	2				0.316507	0.0500196	1.30086		71	21	21	1.26089	0.334444	18.958	73	73.4	21	21	1.13371	0.181051	19.153	73	55.6	17	17	1.351	0.434028	15.357	47
	1836	Tb927.11.6430	Tb927.11.6430		hypothetical protein, conserved	134.73	10.4	0	19.613	1				0.654301	0.0502755	1.29864		8.3	7	7	1.88669	0.915854	11.604	10	6.1	5	5	1.3082	0.387581	2.0092	8	6.2	5	5	1.5795	0.659468	26.102	8
	1100	Tb927.10.8430	Tb927.10.8430		40S ribosomal protein S12, putative	16.061	65.5	0	164.39	1				0.42487	0.050359	1.29792		65.5	9	9	1.50056	0.585496	6.4862	48	65.5	8	8	1.1842	0.243916	7.8137	47	65.5	8	8	1.3615	0.445197	6.9183	45
	2096	Tb927.2.4710	Tb927.2.4710	TRRM1	RNA-binding protein, putative (TRRM1)	49.983	51.9	0	251	1				0.358829	0.0504493	1.29714		49.2	17	17	1.43488	0.520935	21.577	43	47.2	16	16	1.18174	0.240912	7.9399	43	42.2	14	14	1.2437	0.314639	21.176	32
	3774	Tb927.9.11770;Tb11.v5.0876	Tb927.9.11770		hypothetical protein, conserved	111.26	13.1	0	59.022	2			1	-0.14926	0.050468	1.29698		10.2	7	7	0.944287	-0.0827026	88.955	14	10.6	8	8	0.89222	-0.164529	115	17	9.7	7	7	0.87022	-0.200548	20.904	12
	2673	Tb927.5.2250;Tb927.5.2220;Tb927.5.2190	Tb927.5.2250;Tb927.5.2220;Tb927.5.2190		hypothetical protein, conserved;hypothetical protein, conserved;hypothetical protein, conserved	48.809	24.2	0	49.595	3				0.309197	0.0505226	1.29651		13.7	4	4	1.23327	0.302493	15.263	5	15.2	5	5	1.35433	0.437584	10.07	5	21.7	8	8	1.1388	0.187514	6.9308	12
	3109	Tb927.7.2510	Tb927.7.2510		endoplasmatic reticulum retrieval protein, putative	21.303	5.5	0.0060271	1.7514	1				-0.101963	0.0506705	1.29524		5.5	1	1	0.926526	-0.110096	11.942	4	5.5	1	1	0.937032	-0.0938305	9.6733	4	0	0	0	NaN		NaN	0
	1099	Tb927.10.8420	Tb927.10.8420	TOR1	target of rapamycin (TOR) kinase 1 (TOR1)	271.39	4.7	0	11.714	1				0.583399	0.0507311	1.29473		3.2	4	4	1.79501	0.843992	44.029	4	2.1	3	3	1.43841	0.524479	59.729	3	1.2	2	2	1.3029	0.381726	41.161	2
	3686	Tb927.8.760;Tb927.8.740	Tb927.8.760;Tb927.8.740	Nopp44/46	nucleolar RNA-binding protein (Nopp44/46);nucleolar RNA-binding protein, truncated	35.042	16.8	0	24.997	2				0.489264	0.0508816	1.29344		16.8	4	4	1.62375	0.699326	4.9358	15	16.8	4	4	1.23457	0.304006	6.4672	14	16.8	4	4	1.3798	0.464459	40.252	9
	3504	Tb927.8.4220	Tb927.8.4220		hypothetical protein, conserved	25.995	19.6	0	8.6653	1				0.410798	0.0509181	1.29313		15.1	3	3	1.485	0.570464	11.202	2	12.9	3	3	1.34221	0.42461	31.771	3	11.1	2	2	1.1788	0.237319	NaN	1
	2986	Tb927.6.4650	Tb927.6.4650		UV excision repair RAD23 protein, putative	37.808	44.9	0	54.04	1				0.528973	0.0509753	1.29264		44.9	8	8	1.66895	0.738939	20.835	12	44.9	8	8	1.453	0.539037	28.017	11	40.7	7	7	1.2388	0.308943	6.3832	10
	3820	Tb927.9.13200	Tb927.9.13200		unspecified product	19.711	16.9	0	4.2183	1				-1.06296	0.0510087	1.29236		16.9	2	2	0.384837	-1.37768	20.218	3	16.9	2	2	0.42294	-1.24147	20.204	3	16.9	2	2	0.67374	-0.569736	79.333	3
	514	Tb927.10.1100;Tb927.6.4690	Tb927.10.1100;Tb927.6.4690		60S ribosomal protein L9, putative;60S ribosomal protein L9, putative	21.857	66.7	0	244.3	2				0.342926	0.0510658	1.29187		66.7	13	13	1.40724	0.49287	21.184	46	66.7	13	13	1.16202	0.216635	32.749	48	66.7	13	13	1.2477	0.319271	36.679	35
	2874	Tb927.6.2390	Tb927.6.2390		hypothetical protein, conserved	63.96	24.3	0	39.146	1				0.423211	0.0510973	1.2916		22.6	10	10	1.46321	0.549134	31.07	15	14.7	7	7	1.40809	0.493743	9.4514	7	13.5	7	7	1.1702	0.226755	30.498	11
	4054	Tb927.9.8000	Tb927.9.8000		ubiquitin-conjugating enzyme E2, putative,ubiquitin carrier protein, putative,ubiquitin-protein ligase, putative	17.132	20.7	0	10.207	1				0.311937	0.051155	1.29111		20.7	3	3	1.33763	0.419681	61.123	4	20.7	3	3	1.26963	0.34441	19.174	4	20.7	3	3	1.1264	0.171719	18.071	3
	1581	Tb927.11.1900	Tb927.11.1900		T-complex protein 1, beta subunit, putative	58.057	76.6	0	323.31	1				0.325179	0.0512144	1.29061		76.6	39	39	1.39045	0.475555	13.391	108	76.4	37	37	1.16876	0.224975	15.985	98	66	32	32	1.21	0.275007	24.571	76
	179	Tb927.4.1100;Tb927.11.680;Tb11.0880	Tb927.4.1100;Tb927.11.680;Tb11.0880		ribosomal protein L21E (60S), putative;ribosomal protein L21E (60S), putative;60S ribosomal protein L21e, putative,chrXI additional, unordered contigs	18.015	59.1	0	56.95	3				0.341347	0.0512198	1.29056		58.5	11	11	1.34104	0.423352	8.9888	37	58.5	11	11	1.13336	0.18061	6.4802	32	42.8	9	9	1.338	0.420078	13.011	23
	3514	Tb927.8.4390	Tb927.8.4390	EIF2BB	guanine nucleotide exchange factor subunit GCD7,translation initiation factor 2b, delta subunit, putative,eIF-2B GDP-GTP exchange factor, putative (GCD7)	51.583	35.6	0	40.604	1				0.62779	0.0512792	1.29006		33.3	10	10	1.88811	0.916943	39.909	13	30.5	9	9	1.45127	0.537319	23.507	9	14.3	4	4	1.3464	0.429107	62.472	4
	1287	Tb927.11.11770	Tb927.11.11770		eukaryotic translation initiation factor 4e, putative	47.963	36.7	0	35.765	1				0.251635	0.0513147	1.28976		33.3	10	10	1.27226	0.347399	25.946	16	24.7	10	10	1.20111	0.264374	13.351	10	20.6	8	8	1.1043	0.143132	14.585	10
	2374	Tb927.3.640	Tb927.3.640		hypothetical protein, conserved	32.723	38.5	0	84.685	1				-0.127843	0.0513186	1.28973		35.8	7	7	0.882379	-0.18053	57.749	16	24.3	5	5	0.915835	-0.126841	10.048	14	34.5	7	7	0.94858	-0.0761586	8.7032	14
	2718	Tb927.5.3210	Tb927.5.3210	SUMO	small ubiquitin-related modifier, putative (TbSUMO)	12.378	28.9	0	14.931	1				-0.444516	0.0514186	1.28888		28.9	4	4	0.658762	-0.602172	7.7407	6	28.9	4	4	0.714235	-0.48553	38.89	4	28.9	4	4	0.84332	-0.245848	11.543	6
	3778	Tb927.9.11850	Tb927.9.11850	SMC1	structural maintenance of chromosome 1, putative (SMC1)	144.54	9	0	23.198	1				-0.294513	0.0514815	1.28835		4.5	5	5	0.858222	-0.220578	18.517	5	6	7	7	0.740467	-0.433494	18.119	8	2.6	3	3	0.85295	-0.229467	20.453	4
	258	Tb927.10.8530;Tb927.10.8520;Tb927.10.8510;Tb927.10.8500;Tb927.10.8490;Tb11.v5.0332;Tb11.v5.0331;Tb11.v5.0333;Tb927.10.8480;Tb927.10.8470;Tb927.10.8460;Tb927.10.8440;Tb11.v5.0330;Tb11.v5.0309;Tb11.v5.0308;Tb11.v5.0307	Tb927.10.8530;Tb927.10.8520;Tb927.10.8510;Tb927.10.8500;Tb927.10.8490;Tb11.v5.0332;Tb11.v5.0331;Tb11.v5.0333	THT2A	glucose transporter,glucose transporter 2A (THT2A);glucose transporter, putative;glucose transporter, putative;glucose transporter, putative;glucose transporter, putative;THT2A - glucose transporter, putative;THT1 - hexose transporter, putative;THT1	56.926	23.6	0	33.492	16				0.682495	0.0515101	1.28811		21.6	9	8	1.44265	0.528719	12.523	16	16.6	8	8	2.00662	1.00477	14.953	16	9.6	7	7	1.428	0.513996	16.502	11
	399	Tb927.1.1960	Tb927.1.1960		chaperone protein DNAj, putative	75.71	15.3	0	25.291	1				0.42776	0.0515765	1.28755		12.8	6	6	1.50566	0.590397	11.617	6	10.6	6	6	1.18296	0.242396	26.113	6	1.7	1	1	1.3665	0.450485	38.943	2
	3021	Tb927.6.640	Tb927.6.640		kinetoplastid-specific phospho-protein phosphatase, putative	79.106	35.8	0	107.67	1				0.229069	0.0518202	1.2855		19.2	10	10	1.17356	0.230888	18.815	16	28.6	12	12	1.09745	0.13416	18.648	19	14.6	7	7	1.2502	0.322159	5.5832	9
	1420	Tb927.11.14330	Tb927.11.14330		hypothetical protein, conserved	176.83	13.5	0	32.586	1				0.413164	0.0518285	1.28543		12.6	12	12	1.52467	0.608496	11.007	13	8.1	9	9	1.25477	0.327421	6.7981	9	4.7	5	5	1.2342	0.303576	19.781	5
	732	Tb927.10.15180	Tb927.10.15180		nucleosome assembly protein, putative	41.302	41.8	0	164.98	1				0.416224	0.0520656	1.28345		39.1	14	14	1.53039	0.613895	15.446	33	41.8	15	15	1.25036	0.322343	19.982	34	25.1	9	9	1.2418	0.312433	37.391	20
	1841	Tb927.11.6510;Tb927.11.6500	Tb927.11.6510;Tb927.11.6500		40S ribosomal protein S21, putative;40S ribosomal protein S21, putative	21.118	47.9	0	161.31	2				0.357638	0.0522123	1.28223		40.2	3	3	1.37899	0.463609	17.408	16	47.9	4	4	1.14024	0.189335	15.696	19	25.8	3	3	1.3379	0.41997	25.532	18
	142	Tb927.5.4410;Tb05.5K5.60	Tb927.5.4410;Tb05.5K5.60		hypothetical protein, conserved;hypothetical protein, conserved,BAC from homologous region on chr5	23.593	26.6	0	17.84	2				0.225955	0.0522691	1.28175		21.6	3	3	1.15457	0.207361	17.231	6	22.9	3	3	1.18472	0.244548	20.832	6	0	0	0	NaN		NaN	0
	2013	Tb927.2.1180	Tb927.2.1180		retrotransposon hot spot protein 3 (RHS3), putative	67.838	9.5	0	6.8129	1				0.196677	0.0524931	1.2799		8.1	4	1	1.22102	0.288082	9.2105	2	8.1	4	1	1.12462	0.169436	9.5198	2	9.5	5	1	1.0962	0.132511	5.9829	2
	2656	Tb927.5.1810;Tb927.5.1830	Tb927.5.1810;Tb927.5.1830	p67	lysosomal/endosomal membrane protein p67 (p67);lysosomal/endosomal membrane protein p67,lysosomal membrane glycoprotein	72.732	52.8	0	323.31	2				-0.237551	0.0525951	1.27906		51	21	21	0.806062	-0.311038	7.5467	77	51	21	21	0.916422	-0.125916	15.399	75	42.8	19	19	0.82605	-0.275699	32.653	40
	2285	Tb927.3.3850	Tb927.3.3850	sec16	hypothetical protein, conserved	146.55	4.3	0	17.857	1				0.160914	0.0528107	1.27728		4.3	4	4	1.17922	0.23783	13.59	4	3.2	3	3	1.08568	0.118602	10.042	4	2.3	2	2	1.0915	0.126312	7.5519	2
	844	Tb927.10.2900;Tb11.v5.0837	Tb927.10.2900;Tb11.v5.0837		importin beta-1 subunit, putative;importin beta-1 subunit, putative	95.068	28.1	0	68.09	2				0.600415	0.0528425	1.27702		19.7	12	12	1.7575	0.813525	29.358	16	16.2	10	10	1.58125	0.661068	15.258	11	17.2	11	11	1.2541	0.326652	34.877	11
	3709	Tb927.8.8310	Tb927.8.8310		chaperone protein DNAj, putative	51.72	40.5	0	57.43	1				0.195326	0.0529244	1.27634		33.7	10	10	1.10563	0.144871	13.001	12	40.5	12	12	1.22167	0.288858	24.352	15	19.1	6	6	1.1113	0.152248	11.923	8
	281	Tb927.1.1560;Tb11.v5.0464	Tb927.1.1560;Tb11.v5.0464		vesicular-fusion protein nsf, putative,N-ethylmaleimide sensitive factor (NsF);vesicular-fusion protein nsf, putative	79.953	17	0	30.5	2				0.0918614	0.0535013	1.27164		13.8	8	7	1.0395	0.0558912	24.5	7	13.8	8	7	1.09599	0.13223	37.142	8	10.8	6	5	1.0625	0.0874628	19.089	5
	928	Tb927.10.4890	Tb927.10.4890		hypothetical protein, conserved	32.142	18.6	0	5.1373	1			1	-0.720858	0.0540056	1.26756		15.3	2	2	0.633072	-0.659559	8.1387	3	18.6	3	3	0.581497	-0.782157	35.042	3	0	0	0	NaN		NaN	0
	3754	Tb927.9.11000	Tb927.9.11000	RAB7	small GTPase, putative,GTP-binding protein, putative (RAB7)	14.819	16.5	0	11.856	1				-0.303526	0.0542821	1.26534		10.8	2	2	0.793588	-0.333538	33.897	5	16.5	3	3	0.750751	-0.413594	44.455	4	16.5	2	2	0.89289	-0.163446	1.9227	3
	727	Tb927.10.1510	Tb927.10.1510	NOT1	NOT1 (NOT1)	259.12	49	0	323.31	1				0.202808	0.0543093	1.26513		46	80	80	1.23207	0.301088	17.145	158	41.6	73	73	1.10721	0.14693	17.074	134	32.5	59	59	1.1176	0.160404	21.141	106
	2239	Tb927.3.3000	Tb927.3.3000	PIFTC3	flagellar transport protein, putative (PIFTC3)	64.892	43.3	0	54.462	1			1	0.337263	0.0544657	1.26388		24.4	9	9	1.3068	0.386035	20.254	12	29	13	13	1.36478	0.448666	21.726	15	28.8	11	11	1.1306	0.177089	15.734	11
	1659	Tb927.11.3240	Tb927.11.3240	TCP-1-zeta	T-complex protein 1, zeta subunit, putative (TCP-1-zeta)	59.579	71	0	323.31	1				0.329253	0.0544899	1.26368		71	32	32	1.40359	0.489119	16.634	100	70.6	30	30	1.17986	0.238613	16.444	82	62.3	27	27	1.1975	0.260026	48.125	70
	2896	Tb927.6.2860	Tb927.6.2860		hypothetical protein, conserved	48.966	11.6	0	6.6815	1			1	0.676827	0.0545522	1.26319		9.2	2	2	1.96847	0.977071	19.95	2	9.2	2	2	1.56365	0.644916	19.976	3	2.4	1	1	1.3273	0.408494	NaN	1
	918	Tb927.10.4640	Tb927.10.4640	EIF3L	eukaryotic translation initiation factor 3 subunit L, putative	55.649	45.3	0	229.13	1				0.259569	0.0546577	1.26235		42.6	14	14	1.30455	0.383548	11.318	31	45.3	15	15	1.16462	0.219858	13.113	31	31.8	11	11	1.1292	0.175301	19.064	23
	3267	Tb927.7.580	Tb927.7.580		GTP-binding protein, putative	76.908	7.2	0	5.9722	1				0.49897	0.054854	1.26079		5.9	3	3	1.46987	0.555693	16.858	5	1.8	1	1	1.59772	0.676019	NaN	1	4.7	3	3	1.2018	0.265197	28.018	4
	283	Tb927.1.2390;Tb927.1.2370;Tb927.1.2350;Tb927.1.2330;Tb11.v5.0469;Tb927.1.2410	Tb927.1.2390;Tb927.1.2370;Tb927.1.2350;Tb927.1.2330;Tb11.v5.0469;Tb927.1.2410		beta tubulin;beta tubulin;beta tubulin;beta tubulin;beta tubulin, putative;beta tubulin, pseudogene	49.704	83.3	0	323.31	6				-0.0816721	0.0549144	1.26031		83.3	32	32	0.953107	-0.0692898	10.941	424	82.6	31	31	0.919709	-0.12075	9.9154	441	76.9	26	26	0.96261	-0.0549767	10.495	251
	2829	Tb927.6.160	Tb927.6.160		retrotransposon hot spot protein 1 (RHS1), putative	77.485	8.6	0.0015814	2.4457	1				0.585108	0.0549783	1.25981		5.8	4	1	1.81051	0.856398	16.923	2	8.6	6	1	1.29249	0.370154	8.6169	4	5.4	4	1	1.4427	0.528771	2.366	2
	1450	Tb927.11.15020	Tb927.11.15020	TbSODB	iron superoxide dismutase (TbSODB)	23.28	77.4	0	70.71	1				0.413073	0.0550009	1.25963		77.4	12	5	1.5227	0.606628	4.5935	10	76.9	10	4	1.28959	0.366913	10.078	11	57.7	7	3	1.2022	0.265677	31.683	9
	3668	Tb927.8.7100	Tb927.8.7100		acetyl-CoA carboxylase	242.91	39.8	0	228.17	1				0.483992	0.0551139	1.25874		33.1	50	50	1.64764	0.720398	34.67	69	25	37	37	1.30334	0.382213	15.868	48	18.3	32	32	1.274	0.349365	51.439	43
	3710	Tb927.8.8330	Tb927.8.8330		calpain, putative,cysteine peptidase, putative	98.456	14.8	0	81.821	1				-0.118005	0.0551428	1.25851		14.6	9	1	0.924898	-0.112633	8.023	6	14.8	10	2	0.888494	-0.170566	51.916	8	7	5	1	0.9521	-0.0708151	13.058	7
	2534	Tb927.4.400	Tb927.4.400	DRBD7	RNA-binding protein, putative (DRBD7)	42.495	29.2	0	29.392	1				0.428911	0.0551461	1.25849		27.1	5	5	1.38143	0.466158	18.896	5	26.3	5	5	1.31191	0.391664	54.166	5	0	0	0	NaN		NaN	0
	2067	Tb927.2.3930	Tb927.2.3930		DNA replication licensing factor MCM3, putative	88.961	1.6	0.00028843	3.5162	1				0.384732	0.0551564	1.2584		1.6	1	1	1.44651	0.532574	NaN	1	1.6	1	1	1.33074	0.412232	20.579	4	1.6	1	1	1.1562	0.209391	NaN	1
	483	Tb927.10.10140	Tb927.10.10140	PFC19	paraflagellar rod component, putative (PFC19)	37.014	69.5	0	245.72	1				-0.13934	0.0551706	1.25829		69.5	14	14	0.951747	-0.0713507	7.3092	46	69.5	14	14	0.883236	-0.179129	17.475	44	64.7	13	13	0.89036	-0.167539	12.4	30
	894	Tb927.11.14130;Tb927.10.3840	Tb927.11.14130;Tb927.10.3840		ribosomal protein L18, putative;60S ribosomal protein L18a, putative	20.904	63.7	0	160.38	2				0.354146	0.0553892	1.25657		63.7	14	14	1.3624	0.446148	9.0223	63	63.7	15	15	1.13307	0.180234	7.9486	52	53.6	12	12	1.3529	0.436055	6.8327	51
	1219	Tb927.11.10520	Tb927.11.10520	kkt2	protein kinase, putative,tyrosine kinase, putative	139.2	3.9	0	5.9738	1				-0.155458	0.0555179	1.25557		3	2	2	0.899928	-0.152118	30.872	2	3.9	3	3	0.856604	-0.223299	47.032	3	1.3	1	1	0.9389	-0.0909565	NaN	1
	3194	Tb927.7.3980	Tb927.7.3980		immunodominant antigen, putative,tc40 antigen-like	97.32	41.8	0	323.31	1				0.0822346	0.0555387	1.2554		35.1	24	24	1.0744	0.103534	26.489	49	35	23	23	1.02939	0.0417885	13.765	40	36.2	22	22	1.0728	0.101381	14.808	39
	1692	Tb927.11.3740	Tb927.11.3740	RPT2	proteasome regulatory ATPase subunit 2 (RPT2)	48.928	51.5	0	164.72	1				0.517365	0.0557134	1.25404		49.4	16	15	1.70809	0.772382	23.535	32	47.4	15	14	1.31043	0.390037	29.927	21	47.8	14	14	1.3101	0.389677	25.605	23
	1215	Tb927.11.10460	Tb927.11.10460		hypothetical protein, conserved	33.836	5.8	0	5.9265	1				0.424067	0.0557297	1.25391		5.8	1	1	1.55092	0.633121	NaN	1	5.8	1	1	1.24927	0.321081	NaN	1	5.8	1	1	1.2466	0.317999	NaN	1
	1461	Tb927.11.15180	Tb927.11.15180		hypothetical protein, conserved	12.897	48.6	0	19.365	1			1	0.481112	0.0559424	1.25226		28.8	3	3	1.29993	0.378438	20.398	2	10.8	1	1	1.27175	0.346812	NaN	1	48.6	4	4	1.645	0.718087	27.201	6
	1972	Tb927.11.9440	Tb927.11.9440		hypothetical protein, conserved	61.765	25	0	23.027	1				-0.209702	0.0561402	1.25073		16.5	5	5	0.890869	-0.166715	56.127	6	19.4	6	6	0.804959	-0.313014	35.364	8	12.3	4	4	0.90164	-0.149377	9.3306	7
	2340	Tb927.3.5050	Tb927.3.5050		60S ribosomal protein L4	41.856	63.1	0	323.31	1				0.336746	0.0562161	1.25014		63.1	25	25	1.30647	0.385677	12.893	115	63.1	25	25	1.12832	0.174182	21.981	120	46.8	20	20	1.3664	0.45038	17.568	78
	2422	Tb927.4.1590.2;Tb927.4.1590.1	Tb927.4.1590.2;Tb927.4.1590.1		unspecified product;unspecified product	39.655	2.6	0.0023377	2.2303	2			1	-0.245217	0.0562735	1.2497		2.6	1	1	0.805218	-0.312549	NaN	1	2.6	1	1	0.917684	-0.123931	NaN	1	2.6	1	1	0.81272	-0.29917	16.092	2
	1410	Tb927.11.1420	Tb927.11.1420		hypothetical protein, conserved	94.838	25.3	0	39.99	1				0.332402	0.0564583	1.24827		13.3	7	7	1.40734	0.492972	30.792	11	10.1	5	5	1.21853	0.285144	27.649	10	13.1	6	6	1.164	0.219091	29.257	8
	1024	Tb927.10.7120	Tb927.10.7120		hypothetical protein, conserved	37.269	18.8	0	10.573	1			1	-0.193294	0.0564906	1.24802		10.8	4	4	0.88574	-0.175045	15.787	5	10.8	4	4	0.821288	-0.28404	16.659	5	12.3	4	4	0.91968	-0.120796	7.4069	5
	1655	Tb927.11.3120	Tb927.11.3120	NOG1	nucleolar GTP-binding protein 1 (NOG1)	74.753	31.6	0	50.594	1				0.221907	0.0565124	1.24786		26.9	14	14	1.22578	0.293695	12.615	17	25.8	13	13	1.1962	0.25846	29.166	16	12.8	7	7	1.0819	0.113567	24.563	9
	575	Tb927.10.12410	Tb927.10.12410		hypothetical protein, conserved	24.659	61	0	66.632	1				-0.133087	0.0565476	1.24759		51.3	9	9	0.952926	-0.0695647	11.087	12	36.4	7	7	0.882223	-0.180784	15.727	8	60.5	9	9	0.90193	-0.148913	26.873	10
	3026	Tb927.6.740	Tb927.6.740		ATP-dependent DEAH-box RNA helicase, putative	139.08	5	0	18.81	1				0.415942	0.0565701	1.24741		5	5	5	1.18641	0.246601	37.277	5	3.6	3	3	1.5192	0.603314	47.396	3	0.7	1	1	1.3176	0.397912	NaN	1
	1946	Tb927.11.8930	Tb927.11.8930		hypothetical protein, conserved	53.439	7.3	0	5.5535	1			1	0.876944	0.056844	1.24531		7.3	2	2	2.38163	1.25195	7.7848	2	5	1	1	1.40942	0.495105	NaN	1	5	1	1	1.8452	0.883777	NaN	1
	1054	Tb927.10.7630	Tb927.10.7630		transportin2- like protein	103.87	8	0	16.422	1				0.901541	0.0568467	1.2453		4.5	3	3	2.21651	1.14829	34.791	4	5.2	3	3	1.36889	0.453004	16.312	2	3.2	2	2	2.1485	1.10333	21.767	2
	2366	Tb927.3.5570	Tb927.3.5570		syntaxin, putative	29.242	15.8	0	5.4023	1				-0.0705272	0.0571047	1.24333		11.9	3	3	0.975705	-0.0354831	24.738	5	15.8	4	4	0.942863	-0.0848807	18.114	6	6.5	2	2	0.93873	-0.0912177	19.432	3
	2344	Tb927.3.5130	Tb927.3.5130		hypothetical protein, conserved	44.197	26.5	0	30.622	1				-0.259402	0.0572221	1.24244		23.3	8	8	0.775194	-0.367371	16.268	10	21.4	7	7	0.830634	-0.267716	13.77	9	24.1	7	7	0.90556	-0.143118	25.808	7
	3581	Tb927.8.5620	Tb927.8.5620		ubiquitin carboxyl-terminal hydrolase, putative	158.91	1.9	0	8.9837	1				0.794583	0.0573191	1.2417		0.8	1	1	1.63122	0.705947	NaN	1	0.8	1	1	1.41723	0.503078	NaN	1	1.1	1	1	2.2575	1.17473	NaN	1
	3832	Tb927.9.13520	Tb927.9.13520		hypothetical protein, conserved	99.86	16.4	0	40.579	1				0.640456	0.057482	1.24047		12.4	9	9	1.94742	0.961564	9.2479	11	5.5	4	4	1.3927	0.477884	26.677	5	9.6	7	7	1.3966	0.481919	26.091	8
	2817	Tb927.6.1430	Tb927.6.1430		hypothetical protein, conserved	87.828	14.4	0	23.484	1				0.719164	0.0574837	1.24046		10.5	5	5	2.08742	1.06172	10.158	6	8.1	4	4	1.56416	0.64539	14.772	4	3	1	1	1.3664	0.45038	NaN	1
	1731	Tb927.11.4530	Tb927.11.4530	ARD1	N-acetyltransferase subunit ARD1 (ARD1)	27.484	50.6	0	58.927	1				0.204384	0.0575097	1.24026		45.2	8	8	1.23643	0.306181	12.629	20	50.6	10	10	1.10426	0.143086	8.6224	18	35.1	6	6	1.1203	0.163885	48.492	13
	1388	Tb927.11.13810	Tb927.11.13810		ATP-dependent DEAD/H RNA helicase, putative,ATP- dependent RNA helicase, putative	62.912	28.6	0	47.329	1				0.29576	0.0575685	1.23981		28.6	12	12	1.25674	0.329685	22.069	15	18.9	8	8	1.1124	0.153671	11.758	9	9.9	5	5	1.3231	0.403922	11.729	7
	1708	Tb927.11.4000	Tb927.11.4000		hypothetical protein, conserved	62.906	12.6	0	7.6284	1				-0.288162	0.0576421	1.23926		10.7	3	3	0.772857	-0.371726	13.259	3	4.5	2	2	0.785299	-0.348686	34.569	3	8.1	2	2	0.90496	-0.144074	41.57	2
	2273	Tb927.3.3580	Tb927.3.3580	LPG3	lipophosphoglycan biosynthetic protein, putative (LPG3)	87.766	42.7	0	323.31	1				0.0884867	0.0577707	1.23829		41.7	33	33	1.09052	0.125022	14.264	93	42.6	35	35	1.066	0.0922018	11.144	92	37.4	29	29	1.034	0.0482362	12.904	63
	903	Tb927.10.4050;Tb11.v5.0649	Tb927.10.4050;Tb11.v5.0649		serine palmitoyltransferase, putative;serine palmitoyltransferase, putative	61.392	7.7	0	13.385	2				-1.98869	0.0577789	1.23823		7.7	3	3	0.132906	-2.91152	35.972	4	6.1	2	2	0.275346	-1.86068	9.4588	4	3.6	1	1	0.43713	-1.19387	NaN	1
	3253	Tb927.7.5600	Tb927.7.5600		leucine-rich repeat protein (LRRP), putative	114.62	6.2	0	5.032	1				-0.441798	0.0578148	1.23796		4.2	3	3	0.81367	-0.297485	20.132	4	3.4	3	3	0.632751	-0.66029	21.381	3	1.2	1	1	0.77506	-0.36762	NaN	1
	2763	Tb927.5.4100	Tb927.5.4100		hypothetical protein, conserved	51.109	3.3	0	5.3971	1				0.305597	0.0580452	1.23623		3.3	1	1	1.21222	0.277656	NaN	1	0	0	0	NaN		NaN	0	3.3	1	1	1.2601	0.333538	NaN	1
	229	Tb11.v5.0252;Tb927.11.7310	Tb11.v5.0252;Tb927.11.7310		RNA binding protein, putative;RNA binding protein, putative	33.522	26.2	0	13.03	2				0.0973845	0.0580684	1.23606		26.2	5	5	1.08331	0.115441	48.142	7	21.8	4	4	1.03442	0.0488151	52.494	5	7.8	2	2	1.0927	0.127897	33.455	2
	1415	Tb927.11.14250	Tb927.11.14250	TCP-1-epsilon	T-complex protein 1, epsilon subunit, putative (TCP-1-epsilon)	59.381	71.9	0	323.31	1				0.346726	0.0581015	1.23581		71.7	32	32	1.43234	0.51837	19.218	84	63	29	29	1.17444	0.231972	12.604	73	59.7	29	29	1.2225	0.289834	16.013	68
	3247	Tb927.7.5490	Tb927.7.5490	PRMT7	arginine N-methyltransferase, type III (PRMT7)	44.026	21.3	0	33.016	1				0.479665	0.0582371	1.2348		19.5	5	5	1.34398	0.426509	7.3836	8	15.6	4	4	1.63682	0.710897	21.645	5	15.4	4	4	1.2325	0.301588	2.2802	4
	2029	Tb927.2.220	Tb927.2.220		retrotransposon hot spot protein (RHS, pseudogene), putative,retrotransposon hot spot protein 2 (RHS2), interrupted, degenerate	29.081	13.5	0.0033402	2.0842	1			1	0.264661	0.0584569	1.23316		13.5	2	1	1.23796	0.307966	NaN	1	13.5	2	1	1.09677	0.133258	NaN	1	13.5	2	1	1.277	0.352758	NaN	1
	3459	Tb927.8.3100	Tb927.8.3100	CRN12	coronin, putative (CRN12)	57.312	27.5	0	58.839	1				0.367607	0.058828	1.23042		23.1	6	6	1.39817	0.483541	1.7933	11	25.2	6	6	1.35316	0.436334	18.126	10	11.5	3	3	1.1352	0.182947	7.8506	4
	2842	Tb927.6.1870	Tb927.6.1870		eukaryotic translation initiation factor 4e, putative	46.541	52.9	0	88.301	1				0.356989	0.0588861	1.22999		52.9	16	16	1.4228	0.508732	58.929	28	48	14	14	1.14479	0.195087	36.151	25	37.9	11	11	1.2898	0.367147	22.142	16
	391	Tb927.1.1710	Tb927.1.1710		hypothetical protein, conserved	195.44	7.8	0	26.733	1			1	0.645937	0.059443	1.2259		5.7	6	6	1.72381	0.785602	13.889	7	4.3	4	4	1.78374	0.834905	17.811	5	3.7	4	4	1.246	0.317304	67.927	5
	2650	Tb927.5.1700	Tb927.5.1700		replication Factor A 28 kDa subunit, putative	27.593	40	0	43.108	1				0.35715	0.0596034	1.22473		30.2	6	6	1.43548	0.521536	4.9544	11	30.2	6	6	1.15348	0.205996	2.6704	13	27.1	4	4	1.2692	0.343919	8.9637	5
	2080	Tb927.2.4330;Tb11.v5.0777	Tb927.2.4330		PFR5	87.142	19.6	0	26.889	2				-0.180501	0.0596608	1.22431		11.2	5	5	0.926526	-0.110096	2.4199	16	8.9	5	5	0.830772	-0.267476	10.168	19	13.6	9	9	0.89259	-0.16393	25.98	20
	1102	Tb927.10.8540	Tb927.10.8540		chaperone protein DNAj, putative	36.435	47.6	0	53.779	1				0.711751	0.0597189	1.22389		47.6	9	9	2.10833	1.0761	17.253	17	44.3	7	7	1.43833	0.524396	7.8792	11	26.8	5	5	1.4487	0.534759	18.912	7
	1993	Tb927.11.9760	Tb927.11.9760		hypothetical protein, conserved	45.743	9.8	0	31.238	1				0.55238	0.0599519	1.2222		9.8	3	3	1.74685	0.804753	16.228	6	7	2	2	1.45182	0.537864	2.1592	3	3	1	1	1.2436	0.314523	NaN	1
	3275	Tb927.7.6090	Tb927.7.6090		hypothetical protein, conserved	88.162	49.7	0	323.31	1				0.263245	0.0601088	1.22106		46.2	34	34	1.2767	0.352418	23.372	76	42	33	33	1.09474	0.130587	10.947	63	43.8	34	34	1.2369	0.306729	28.962	77
	3910	Tb927.9.2320	Tb927.9.2320		hypothetical protein, conserved	41.498	42.8	0	127.78	1				-0.162109	0.0602403	1.22011		32.2	10	10	0.94688	-0.0787464	16.169	17	36.2	11	11	0.869414	-0.201885	20.205	15	34.1	9	9	0.86712	-0.205696	10.927	11
	1262	Tb927.11.11330;Tb11.v5.1035;Tb11.v5.1034	Tb927.11.11330;Tb11.v5.1035		heat shock protein 70;heat shock protein 70 (hsp70), putative	71.408	74.7	0	323.31	3				0.587282	0.0605828	1.21765		74.7	48	36	1.79698	0.845572	10.545	230	74.7	46	34	1.24908	0.320865	18.08	200	74.7	48	36	1.5109	0.595408	15.918	165
	3683	Tb927.8.750	Tb927.8.750		nucleolar RNA-binding protein, putative	39.761	21.6	0	32.622	1				0.26348	0.0606009	1.21752		21.6	6	6	1.21938	0.286146	17.062	12	19.7	5	5	1.09888	0.13603	13.833	10	11.5	4	4	1.2908	0.368265	9.4004	7
	765	Tb927.9.15210;Tb927.10.1590	Tb927.9.15210;Tb927.10.1590		ribosomal protein L36, putative;ribosomal protein L36, putative	12.457	41.3	0	22.589	2				0.300393	0.0608079	1.21604		41.3	5	5	1.26897	0.343659	5.7291	20	41.3	5	5	1.10924	0.149569	8.8316	22	41.3	5	5	1.3268	0.407951	2.2977	19
	1859	Tb927.11.6810;Tb11.v5.0901	Tb927.11.6810	TTL	tubulin-tyrsoine ligase-like protein, putative (TTL)	108.44	16.7	0	46.866	2			1	-0.244192	0.0608159	1.21598		8.5	7	7	0.811425	-0.301471	12.113	11	10.8	9	9	0.921404	-0.118094	16.005	14	8.1	6	6	0.80496	-0.313011	14.871	7
	2281	Tb927.3.3740	Tb927.3.3740		hypothetical protein, conserved	69.176	16.7	0	13.257	1				0.608639	0.0608517	1.21573		7.9	3	3	1.80597	0.852771	26.319	3	8.9	3	3	1.2435	0.31441	17.883	3	12.6	4	4	1.5787	0.658737	110.96	4
	304	Tb927.10.350;Tb11.v5.0564	Tb927.10.350;Tb11.v5.0564		protein kinase, putative;protein kinase, putative	58.557	10.7	0	16.632	2				0.349484	0.0608781	1.21554		7.8	3	3	1.37773	0.462296	35.383	3	5.1	2	2	1.33372	0.415461	44.618	2	5.3	2	2	1.1256	0.170694	28.7	2
	4045	Tb927.9.7620;Tb927.9.7590	Tb927.9.7620;Tb927.9.7590		60S ribosomal protein L11, putative;60S ribosomal protein L11, putative	22.369	58.2	0	91.079	2				0.336345	0.0609228	1.21522		52.6	9	9	1.31299	0.392857	8.3168	31	57.2	9	9	1.12154	0.165483	10.955	31	53.6	10	10	1.3667	0.450697	26.03	31
	1902	Tb927.11.7890	Tb927.11.7890	ZC3H44	zinc finger protein family member, putative (ZC3H44)	48.18	19.1	0	31.085	1				0.421243	0.060975	1.21485		11.7	3	3	1.48832	0.573682	3.6595	6	11.7	3	3	1.39489	0.480156	6.0341	5	14.5	4	4	1.1566	0.20989	15.104	7
	148	Tb09.v4.0038	Tb09.v4.0038		UDP-Gal or UDP-GlcNAc-dependent glycosyltransferase (pseudogene), putative	42.128	3.6	0.0040984	2.0378	1				0.310029	0.0610382	1.2144		3.6	1	1	1.20613	0.270382	0.16604	2	3.6	1	1	1.14475	0.195038	5.7763	3	3.6	1	1	1.38	0.464668	NaN	1
	2800	Tb927.5.970	Tb927.5.970	CITFA-6	class I transcription factor A, subunit 6 (CITFA-6)	21.712	17.9	0	5.8659	1				0.359917	0.0611391	1.21368		17.9	2	2	1.45336	0.539394	11.234	2	17.9	2	2	1.24366	0.314589	18.315	3	17.9	2	2	1.1694	0.225768	27.704	2
	1119	Tb927.10.8850	Tb927.10.8850		hypothetical protein, conserved	65.888	5.1	0	10.721	1				1.07625	0.0615286	1.21092		5.1	3	3	3.07806	1.62202	48.345	3	3.9	2	2	1.88221	0.912429	30.259	2	2.1	1	1	1.6181	0.694301	NaN	1
	2965	Tb927.6.4340	Tb927.6.4340	TbLSm5	U6 snRNA-associated Sm-like protein LSm5p (TbLSm5)	12.791	14.5	0.00028902	3.5679	1				0.321194	0.0617662	1.20925		14.5	1	1	1.22258	0.289933	NaN	1	14.5	1	1	1.27673	0.352455	NaN	1	0	0	0	NaN		NaN	0
	1556	Tb927.11.16760	Tb927.11.16760	TCP-1-alpha	T-complex protein 1, alpha subunit, putative (TCP-1-alpha)	54.623	66.1	0	323.31	1				0.307949	0.0618526	1.20864		65.9	27	27	1.38324	0.468052	26.437	64	63.8	27	27	1.18114	0.240179	28.373	61	60	24	24	1.1612	0.215617	34.382	45
	3956	Tb927.9.4050	Tb927.9.4050		hypothetical protein, conserved	61.687	3.1	0	3.7925	1				0.669961	0.061942	1.20802		3.1	1	1	2.02437	1.01748	NaN	1	3.1	1	1	1.44586	0.531928	NaN	1	3.1	1	1	1.376	0.460481	NaN	1
	3156	Tb927.7.3370	Tb927.7.3370		hypothetical protein, conserved	67.485	37.6	0	79.999	1				0.380139	0.0619642	1.20786		31.7	18	18	1.48335	0.568859	12.599	27	14.8	9	9	1.17462	0.232193	26.864	13	19.1	12	12	1.2652	0.339365	36.714	20
	1495	Tb927.11.15760	Tb927.11.15760	TTA1	GPI transamidase subunit Tta1 (TTA1)	41.915	9.8	0	4.3143	1				-0.10083	0.0620798	1.20705		9.8	3	3	0.921914	-0.117296	22.347	3	7.7	2	2	0.966464	-0.0492126	7.5133	3	5.6	2	2	0.91005	-0.135982	24.396	3
	411	Tb927.1.2670	Tb927.1.2670		flagellar protein PF16	56.126	63.2	0	201.85	1				-0.15623	0.0626778	1.20289		63	22	22	0.89662	-0.157432	17.752	42	63.2	22	22	0.854555	-0.226755	27.398	40	51.9	17	17	0.94311	-0.0845021	8.3259	25
	768	Tb927.10.16120	Tb927.10.16120		inosine-5-monophosphate dehydrogenase,IMP dehydrogenase	48.481	80.8	0	323.31	1				-0.0362276	0.0630994	1.19998		79	30	30	0.971534	-0.0416635	12.156	89	77.6	28	28	0.987849	-0.017637	10.146	78	70.7	25	25	0.96635	-0.0493823	30.178	69
	699	Tb927.11.4820;Tb927.10.14580	Tb927.11.4820;Tb927.10.14580		60S ribosomal protein L17, putative;60S ribosomal protein L17, putative	19.105	38.6	0	101.11	2				0.315664	0.0631389	1.1997		38.6	7	7	1.26261	0.336409	6.5963	29	38.6	7	7	1.11892	0.162105	9.342	31	26.5	4	4	1.3646	0.448478	2.7502	12
	473	Tb927.1.880;Tb11.v5.0418;Tb11.v5.0419	Tb927.1.880	MDN1	hypothetical protein, conserved	512.6	5.8	0	47.791	3				0.39718	0.0631917	1.19934		5.3	17	17	1.51517	0.599484	32.014	18	4.4	14	14	1.18758	0.248022	21.102	13	1.2	5	5	1.2693	0.344033	10.398	3
	2178	Tb927.3.1740	Tb927.3.1740		hypothetical protein, conserved	76.97	15.1	0	22.45	1				-0.19578	0.0636969	1.19588		8.8	5	5	0.827061	-0.273934	12.761	5	12.3	6	6	0.934667	-0.097476	34.745	7	6.4	4	4	0.86099	-0.215932	16.692	3
	867	Tb927.10.3310	Tb927.10.3310		hypothetical protein, conserved	110.24	3.7	0	7.6446	1				-0.275128	0.0638306	1.19497		3.7	2	2	0.888021	-0.171335	4.3953	2	3.7	2	2	0.749457	-0.416083	8.1691	3	1.5	1	1	0.84794	-0.237966	11.743	2
	1148	Tb927.10.9400	Tb927.10.9400		branch point binding protein, putative	31.63	12.5	0	10.821	1			1	0.284632	0.0638384	1.19492		5.5	1	1	1.30724	0.386525	NaN	1	5.5	1	1	1.25736	0.330393	NaN	1	12.5	3	3	1.0996	0.136979	62.856	3
	3338	Tb927.7.7460	Tb927.7.7460		hypothetical protein, conserved	22.358	82.8	0	276.36	1				0.232122	0.0640585	1.19342		82.8	14	14	1.27771	0.353561	7.4106	52	82.8	13	13	1.11101	0.151875	11.652	52	76	14	14	1.1415	0.190931	17.297	35
	1599	Tb927.11.2250	Tb927.11.2250		hypothetical protein, conserved	26.94	33.6	0	44.965	1				0.392706	0.0642572	1.19208		33.6	5	5	1.37986	0.464524	46.813	9	22.8	4	4	1.13802	0.186525	39.599	10	22.8	4	4	1.441	0.52707	26.977	10
	440	Tb927.1.4050	Tb927.1.4050		protein phosphatase with EF-Hand domains (PPEF),ser/thr protein phosphatase, putative	105.75	30.3	0	72.203	1				-0.105178	0.0653216	1.18494		21.6	15	15	0.924385	-0.113434	13.432	23	25.7	16	16	0.901551	-0.14952	18.413	22	14.8	10	10	0.96421	-0.0525808	8.0394	14
	1290	Tb927.11.11830;Tb927.11.11820	Tb927.11.11830;Tb927.11.11820		40S ribosomal protein S17, putative;40S ribosomal protein S17, putative	16.222	57	0	135.21	2				0.300882	0.0655051	1.18372		57	13	13	1.26342	0.337339	9.4622	47	57	13	13	1.1064	0.145877	14.173	45	57	12	12	1.3374	0.419431	16.793	34
	908	Tb927.10.4180	Tb927.10.4180		TFIIF-stimulated CTD phosphatase, putative	28.189	40.1	0	26.122	1			1	0.424769	0.0656221	1.18295		23.5	5	5	1.45533	0.541345	19.846	5	13	3	3	1.45119	0.537236	13.743	4	21.9	3	3	1.1453	0.195726	10.321	5
	408	Tb927.1.2570	Tb927.1.2570	beta-coP	coatomer beta subunit (beta-coP)	110.05	29.2	0	119.07	1				0.515669	0.0657214	1.18229		21.6	17	17	1.66055	0.731661	33.659	24	23.8	17	17	1.47393	0.559664	17.903	26	15.5	11	11	1.1939	0.255682	27.236	19
	2356	Tb927.3.5400	Tb927.3.5400		hypothetical protein, conserved	64.429	10.7	0	10.888	1				0.454629	0.0658038	1.18175		7.5	3	3	1.50884	0.593442	35.473	3	8	3	3	1.15655	0.209829	13.632	3	2.6	1	1	1.4749	0.560617	NaN	1
	1251	Tb927.11.1110	Tb927.11.1110		calpain, putative	171.46	33	0	7.8777	1				-0.167991	0.0659594	1.18072		27.7	8	1	0.93006	-0.104605	NaN	1	27.7	8	1	0.837381	-0.256045	NaN	1	31.9	11	1	0.90543	-0.143325	6.9154	2
	1962	Tb927.11.9220	Tb927.11.9220	RPN2	proteasome regulatory non-ATP-ase subunit 2 (RPN2)	106.51	35.4	0	218.24	1				0.470004	0.0662165	1.17903		32.2	18	18	1.64818	0.720874	26.383	32	32	19	19	1.30383	0.382758	16.957	29	14.8	8	8	1.2366	0.306379	70.379	21
	831	Tb927.10.2650	Tb927.10.2650		hypothetical protein, conserved	132.99	2.4	0	6.8552	1				-0.331919	0.0662546	1.17878		2.4	2	2	0.813802	-0.29725	28.334	2	1.4	1	1	0.775615	-0.366588	NaN	1	0	0	0	NaN		NaN	0
	2372	Tb927.3.5640	Tb927.3.5640		nuclear transcription factor, putative	59.544	13.2	0	9.6939	1				0.357766	0.0665538	1.17683		6.2	4	4	1.39406	0.479291	19.966	6	9.5	3	3	1.34579	0.428449	30.021	5	6.2	4	4	1.1216	0.165558	18.037	9
	725	Tb927.10.15020;Tb11.v5.0633	Tb927.10.15020;Tb11.v5.0633		protein kinase, putative;protein kinase, putative	120.49	2.5	0.0035916	2.0668	2				-0.300307	0.0665609	1.17678		2.5	2	2	0.794534	-0.33182	85.018	3	0.8	1	1	0.830013	-0.268794	NaN	1	0	0	0	NaN		NaN	0
	3702	Tb927.8.8160	Tb927.8.8160		hypothetical protein, conserved	88.487	1.6	0.0028431	2.1506	1				-0.370366	0.0666032	1.1765		1.6	1	1	0.794723	-0.331476	4.4869	2	1.6	1	1	0.753012	-0.409255	NaN	1	0	0	0	NaN		NaN	0
	198	Tb927.7.4890;Tb11.v5.0170	Tb927.7.4890;Tb11.v5.0170		hypothetical protein, conserved;hypothetical protein, conserved	92.655	1.4	0.0015898	2.4999	2				-0.509817	0.0666081	1.17647		1.4	1	1	0.676727	-0.563353	NaN	1	1.4	1	1	0.728863	-0.45628	NaN	1	1.4	1	1	NaN		NaN	0
	416	Tb927.1.3000	Tb927.1.3000		aminoacylase, putative,N-acyl-L-amino acid amidohydrolase, putative	42.938	10.4	0	5.926	1				0.365328	0.0667722	1.1754		5.7	2	2	1.3453	0.427925	0.51233	4	10.4	3	3	1.12547	0.170524	16.269	4	7.7	2	2	1.4118	0.497536	22.197	3
	1235	Tb927.11.10800	Tb927.11.10800		hypothetical protein, conserved	29.847	26.7	0	10.328	1				-0.196359	0.0667772	1.17537		26.7	4	4	0.933445	-0.0993626	11.016	5	26.7	4	4	0.821423	-0.283803	5.9038	4	5	1	1	0.86699	-0.205913	19.725	2
	3460	Tb927.8.3150	Tb927.8.3150	TCP-1-gamma	T-complex protein 1, gamma subunit, putative (TCP-1-gamma)	60.817	73.6	0	323.31	1				0.352433	0.0667801	1.17535		70.5	33	33	1.45514	0.541156	14.499	81	66.5	32	32	1.17118	0.227962	14.02	73	55.6	29	29	1.2211	0.288181	28.401	72
	3418	Tb927.8.2200	Tb927.8.2200		terbinafine resistance locus protein (yip1), putative	20.718	24.3	0	22.32	1				0.0897482	0.0668115	1.17515		24.3	4	4	1.09735	0.134018	4.3212	7	24.3	4	4	1.03503	0.0496659	10.137	6	17.5	2	2	1.0611	0.0855606	13.198	4
	1641	Tb927.11.290	Tb927.11.290		phosphatase and tensin homologue, putative	28.978	5	0.00055695	3.0312	1				0.488299	0.0668558	1.17486		5	1	1	1.68282	0.750882	20.989	3	5	1	1	1.31408	0.394051	NaN	1	5	1	1	1.2483	0.319965	20.424	3
	2647	Tb927.5.1670	Tb927.5.1670		hypothetical protein, conserved	37.922	12.4	0	8.6138	1			1	0.775711	0.0669057	1.17454		8	2	2	2.27723	1.18728	1.1974	2	9.2	2	2	1.57332	0.653809	46.445	3	4.9	1	1	1.4006	0.486045	NaN	1
	737	Tb927.10.15290;Tb11.v5.0628	Tb927.10.15290		hypothetical protein, conserved	178.49	9.5	0	25.47	2				0.188118	0.0669448	1.17428		6.3	6	6	1.21146	0.276747	17.685	6	8.4	8	8	1.13959	0.188512	25.81	9	5.6	6	6	1.0711	0.0990932	24.231	7
	2086	Tb927.2.450	Tb927.2.450		retrotransposon hot spot protein 4 (RHS4), putative	97.997	44.1	0	53.449	1				0.587738	0.067373	1.17151		42.6	30	6	1.73202	0.792457	4.3879	8	40.7	28	5	1.6247	0.700169	19.544	10	26.6	19	3	1.2063	0.270589	41.421	4
	1544	Tb927.11.1660	Tb927.11.1660		vesicular transport protein (CDC48 homologue), putative	73.318	26.1	0	44.679	1			1	0.714865	0.0674441	1.17106		17.5	8	8	2.1486	1.10339	20.291	10	14.5	6	6	1.47575	0.561452	21.149	7	19.5	9	9	1.3945	0.479748	24.829	9
	1677	Tb927.11.3490	Tb927.11.3490		hypothetical protein, conserved	87.8	55	0	285.5	1				0.140567	0.0675297	1.1705		51.3	29	29	1.12761	0.173271	16.574	60	46.9	27	27	1.04524	0.0638313	13.393	55	36.6	22	22	1.1365	0.184598	16.068	39
	1576	Tb927.11.1740	Tb927.11.1740	IFT88	intraflagellar transport protein IFT88 (IFT88)	89.754	25.4	0	68.47	1				0.498883	0.0676517	1.16972		21	13	13	1.54307	0.625801	18.4	18	18.4	10	10	1.16919	0.225514	55.092	11	15	11	11	1.5641	0.645333	38.665	13
	3383	Tb927.8.1570	Tb927.8.1570		hypothetical protein, conserved	28.825	61.8	0	106.8	1				-0.158544	0.0676745	1.16958		61.8	12	12	0.885897	-0.17479	8.2828	22	50	10	10	0.855945	-0.224411	24.78	16	22.4	5	5	0.9484	-0.0764323	12.956	7
	2450	Tb927.4.2070;Tb11.v5.0410;Tb11.v5.0881	Tb927.4.2070;Tb11.v5.0410;Tb11.v5.0881		antigenic protein, putative;antigenic protein, conserved;antigenic protein, putative	511.32	54.5	0	231.42	3				0.20414	0.0677356	1.16918		52.9	14	14	1.2152	0.281193	6.6284	32	53.1	13	13	1.17776	0.236045	18.772	29	51.2	12	12	1.0682	0.0951818	13.527	35
	2312	Tb927.3.4500;Tb11.v5.0629	Tb927.3.4500;Tb11.v5.0629	FHc	fumarate hydratase, class I (FHc);fumarate hydratase, putative	62.262	71.5	0	323.31	2				0.618722	0.0678697	1.16832		69.7	32	32	1.82452	0.867515	52.369	69	66.9	30	30	1.6188	0.694928	59.517	61	49	23	23	1.2258	0.293724	27.202	43
	2006	Tb927.11.9910;Tb11.v5.0355;Tb11.v5.0354	Tb927.11.9910		hypothetical protein, conserved	40.908	34.4	0	24.238	3				0.369272	0.067929	1.16795		32.2	10	10	1.46892	0.554761	11.271	12	24.3	7	7	1.27272	0.347913	5.2284	8	18.9	5	5	1.1528	0.205142	35.68	5
	1089	Tb927.10.8190	Tb927.10.8190	TCP-1-theta	T-complex protein 1, theta subunit, putative,CCT-theta, putative (TCP-1-theta)	58.081	78.6	0	323.31	1				0.311234	0.0680425	1.16722		78.6	31	31	1.39614	0.481445	10.243	82	78.6	29	29	1.15663	0.209929	11.005	64	74.5	29	29	1.1829	0.242328	25.434	64
	1688	Tb927.11.370	Tb927.11.370	RAP1	repressor activator protein 1 (RAP1)	92.869	21.3	0	25.924	1				0.351694	0.0680674	1.16706		16.5	11	11	1.11613	0.15851	16.675	14	12.4	7	7	1.3549	0.43819	20.734	12	5.3	4	4	1.374	0.458382	15.497	5
	291	Tb927.10.3920;Tb11.v5.0502	Tb927.10.3920;Tb11.v5.0502		hypothetical protein, conserved;hypothetical protein, conserved	52.969	9.8	0	8.394	2				-0.358706	0.0682097	1.16615		4.5	1	1	0.809979	-0.304044	NaN	1	4.5	1	1	0.857633	-0.221568	NaN	1	9.8	2	2	0.68278	-0.550507	38.416	2
	3185	Tb927.7.3880	Tb927.7.3880		protein kinase, putative	87.072	21.4	0	41.683	1				0.24084	0.0682695	1.16577		18.2	9	9	1.26002	0.333443	14.957	13	20	10	10	1.08085	0.112163	16.889	12	16.2	8	8	1.2116	0.276913	26.464	11
	2654	Tb927.5.1780	Tb927.5.1780		hypothetical protein, conserved	48.192	72.8	0	323.31	1				-0.288097	0.0684567	1.16458		68.7	22	22	0.879817	-0.184725	33.768	54	68.7	20	20	0.734862	-0.444455	11.807	48	63	17	17	0.84962	-0.23511	14.879	32
	2992	Tb927.6.4750	Tb927.6.4750		hypothetical protein, conserved	67.572	22	0	34.481	1				0.678245	0.0685956	1.1637		20.2	6	6	1.74177	0.800551	43.729	8	15.4	4	4	1.23991	0.310236	14.382	6	4.5	2	2	1.8973	0.923948	19.555	2
	3764	Tb927.9.11270	Tb927.9.11270	TCP-1-eta	T-complex protein 1, eta subunit, putative,t- complex protein 1 (eta subunit), putative (TCP-1-eta)	61.471	71.3	0	323.31	1				0.286174	0.0686134	1.16359		71.3	35	35	1.35988	0.443477	13.902	96	71.3	31	31	1.14322	0.193107	35.189	88	64.1	27	27	1.1663	0.221939	39.255	66
	1550	Tb927.11.16670	Tb927.11.16670		hypothetical protein, conserved	63.505	17.9	0	29.83	1				0.557527	0.0686671	1.16325		13.3	5	5	1.57136	0.652017	17.146	7	10.5	4	4	1.19427	0.256132	12.387	6	8.6	4	4	1.6987	0.764431	13.914	4
	692	Tb927.10.14500	Tb927.10.14500		hypothetical protein, conserved	37.027	64.1	0	282.04	1			1	-0.208554	0.0687091	1.16299		56.1	15	15	0.87535	-0.192068	5.799	55	60.8	16	16	0.803471	-0.315682	68.835	47	57.6	15	15	0.92152	-0.117913	7.4378	31
	3667	Tb927.8.710	Tb927.8.710	DRBD17	RNA-binding protein, putative (DRBD17)	149.48	2	0	5.0543	1				0.438146	0.0688063	1.16237		1.3	1	1	1.5918	0.670658	3.9862	2	1.3	1	1	1.19918	0.262054	NaN	1	2	2	2	1.3029	0.381726	25.422	2
	1170	Tb927.10.9860	Tb927.10.9860		Mitochondrial N(5)-glutamine methyltransferase MTQ1, putative	47.494	2.9	0.001612	2.6345	1			1	-0.483486	0.0688254	1.16225		2.9	1	1	0.691706	-0.531768	6.7134	2	2.9	1	1	0.851861	-0.23131	NaN	1	2.9	1	1	0.62098	-0.687381	14.171	2
	3800	Tb927.9.12650;Tb11.v5.0675	Tb927.9.12650	UBA2	ubiquitin-activating enzyme E1, putative (UBA2)	134.65	35.5	0	210.63	2			1	0.556354	0.0689008	1.16178		32.4	29	29	1.66789	0.738024	24.322	43	28.2	26	26	1.60344	0.681168	16.158	38	21.6	19	19	1.1891	0.24987	12.64	31
	3841	Tb927.9.13990	Tb927.9.13990	DRBD2	RNA-binding protein, putative (DRBD2)	34.618	44.9	0	65.373	1				0.26964	0.0689801	1.16128		44.6	13	13	1.33007	0.411502	12.253	35	42.3	13	13	1.11566	0.157898	7.4676	29	31.8	10	10	1.1806	0.23952	16.285	32
	1126	Tb927.10.8940	Tb927.10.8940	KH1	hypothetical protein, conserved	45.398	82.5	0	323.31	1				-0.130448	0.0692494	1.15958		80.8	30	30	0.896781	-0.157173	10.135	159	82.5	31	31	0.885504	-0.175429	7.3149	151	72	29	29	0.9601	-0.0587434	9.9797	131
	424	Tb927.1.3180	Tb927.1.3180		40S ribosomal protein S11, putative	20.059	55.2	0	88.846	1				0.318966	0.0693328	1.15906		54.6	12	2	1.29825	0.376564	17.759	6	55.2	13	2	1.10567	0.144919	14.331	5	48.3	9	1	1.3523	0.435415	4.9896	4
	1894	Tb927.11.7560	Tb927.11.7560		predicted WD40 repeat protein	67.695	64.5	0	192.71	1				-0.183705	0.0695031	1.158		59	25	25	0.847817	-0.238175	20.329	54	55.6	25	25	0.851789	-0.231432	20.145	47	51.2	22	22	0.94507	-0.0815069	23.443	35
	3000	Tb927.6.4960	Tb927.6.4960	zc3h47	zinc finger-domain protein, putative	29.178	14.9	0	9.5724	1				0.386481	0.0697749	1.1563		14.9	2	2	1.40319	0.488714	22.087	2	8.4	1	1	1.1258	0.170946	NaN	1	14.9	2	2	1.414	0.499782	13.566	2
	589	Tb927.11.9730;Tb927.10.12680	Tb927.11.9730;Tb927.10.12680		60S ribosomal protein L34, putative;60S ribosomal protein L34, putative	19.336	27.1	0	74.505	2			1	0.268118	0.0699301	1.15534		27.1	7	7	1.27789	0.353763	14.982	29	26.5	6	6	1.08589	0.118884	8.7216	29	25.9	5	5	1.2585	0.331705	11.089	15
	2084	Tb927.2.4410	Tb927.2.4410		hypothetical protein, conserved	25.109	5.4	0	3.7694	1				0.134094	0.069994	1.15494		5.4	1	1	1.0862	0.119291	38.568	3	5.4	1	1	1.10872	0.148897	32.679	3	0	0	0	NaN		NaN	0
	2034	Tb927.2.2430	Tb927.2.2430	CK2A2	casein kinase II, alpha chain (CK2A2)	43.288	35.5	0	38.326	1				0.257592	0.0700105	1.15484		18.5	5	5	1.08217	0.113926	31.606	8	14.2	4	4	1.24927	0.321081	37.605	5	26.1	7	7	1.2638	0.337768	9.5228	9
	323	Tb927.2.830;Tb11.v5.0655	Tb927.2.830;Tb11.v5.0655		retrotransposon hot spot protein (RHS, pseudogene), putative,retrotransposon hot spot protein 1 (RHS1), interrupted;hypothetical protein, conserved	40.504	57.1	0	40.237	2			1	0.466151	0.07006	1.15453		52.6	14	6	1.63605	0.710213	27.25	10	39.2	11	3	1.20149	0.264824	28.171	6	49.4	13	6	1.3411	0.423417	15.011	7
	3162	Tb927.7.3440	Tb927.7.3440		I/6 autoantigen	27.05	65	0	179.23	1				-0.169888	0.0701964	1.15369		65	13	8	0.906208	-0.142087	7.9622	26	65	13	8	0.833611	-0.262553	26.301	30	53.3	11	6	0.92979	-0.105023	5.5639	15
	3777	Tb927.9.11840	Tb927.9.11840	PNO1	hypothetical protein, conserved	24.075	46.1	0	25.665	1				0.220964	0.0702634	1.15327		39.2	8	8	1.26952	0.344282	23.994	16	39.2	8	8	1.10974	0.150225	17.041	11	46.1	9	9	1.1238	0.168385	26.934	13
	1510	Tb927.11.16030	Tb927.11.16030	RPN7	proteasome regulatory non-ATP-ase subunit 7 (RPN7)	45.549	40.6	0	75.766	1				0.169941	0.0704607	1.15205		16.8	5	5	1.17367	0.231024	39.231	7	26.3	7	7	1.15092	0.202788	81.399	6	18.8	5	5	1.0541	0.0760118	36.818	5
	1409	Tb927.11.14190	Tb927.11.14190		hypothetical protein, conserved	100.47	33.7	0	246.37	1				0.29755	0.0705877	1.15127		30.6	23	23	1.35984	0.443438	18.948	48	30	24	24	1.22701	0.295146	20.38	48	26.7	20	20	1.1127	0.154065	18.467	33
	376	Tb927.1.120	Tb927.1.120		retrotransposon hot spot protein 4 (RHS4), putative	98.024	58.8	0	323.31	1				0.339343	0.0705992	1.1512		57.2	47	13	1.44219	0.528261	18.672	29	56.1	43	12	1.20296	0.266594	20.192	28	51.6	41	12	1.1673	0.223175	18.83	22
	519	Tb927.10.11180	Tb927.10.11180	ATG7	E1-like ubiquitin-activating enzyme, putative,ATG7/CVT2/APG7, putative (ATG7)	83.425	3.4	0	4.0289	1				0.709275	0.0706036	1.15117		2	1	1	2.12553	1.08783	NaN	1	3.4	2	2	1.54476	0.627382	NaN	1	2	1	1	1.3311	0.412619	11.795	2
	1456	Tb927.11.15110	Tb927.11.15110		hypothetical protein, conserved	64.186	3.1	0.0016278	2.7586	1			1	-0.785719	0.0707814	1.15008		3.1	1	1	0.451671	-1.14666	NaN	1	3.1	1	1	0.564079	-0.82603	25.689	2	3.1	1	1	0.76606	-0.384471	NaN	1
	3327	Tb927.7.7240	Tb927.7.7240		leucine-rich repeat protein (LRRP), putative	78.688	12	0	18.692	1				-0.324022	0.0708027	1.14995		10.3	4	4	0.903751	-0.146003	17.707	5	12	5	5	0.733622	-0.446892	47.065	8	2.1	1	1	0.76888	-0.37917	0.99722	2
	1888	Tb927.11.7470	Tb927.11.7470		hypothetical protein, conserved	26.198	32.8	0	17.078	1				-0.129028	0.0708871	1.14943		18.6	3	3	0.950751	-0.0728604	6.6352	3	27.9	4	4	0.872372	-0.196985	20.07	5	10.5	2	2	0.92195	-0.11724	47.057	3
	954	Tb927.10.5590	Tb927.10.5590		protein phosphatase 2C, putative	66.75	21.1	0	20.698	1			1	-0.179371	0.0710611	1.14837		19.1	5	5	0.943574	-0.083792	30.032	5	9.5	3	3	0.871384	-0.19862	21.099	4	8.9	3	3	0.83758	-0.255701	11.108	5
	4027	Tb927.9.6940	Tb927.9.6940		DNA topoisomerase type IB small subunit	29.968	25.6	0	23.19	1				0.290785	0.0712074	1.14748		19	5	5	1.35977	0.44336	42.29	7	8.1	2	2	1.20312	0.266784	18.802	3	18.3	4	4	1.119	0.16221	28.439	6
	989	Tb927.10.6260;Tb11.v5.0279	Tb927.10.6260;Tb11.v5.0279		ATP-dependent DEAD/H RNA helicase, putative;ATP-dependent DEAD/H RNA helicase, putative	68.678	38.2	0	43.704	2				0.181937	0.0712379	1.14729		23	11	11	1.21803	0.284546	14.257	11	19.2	8	8	1.09745	0.13416	26.616	9	26	10	10	1.0921	0.127105	17.448	13
	2530	Tb927.4.3890	Tb927.4.3890		ATP-dependent RNA helicase, putative	122.8	35.2	0	146.41	1				0.332933	0.071252	1.1472		30.7	21	21	1.38146	0.466197	18.658	29	25.4	17	17	1.11075	0.151538	20.069	24	24	16	16	1.3023	0.381062	11.423	21
	1426	Tb927.11.14430	Tb927.11.14430		proteasome regulatory non-ATP-ase subunit	31.281	40.5	0	24.829	1				0.275966	0.0712894	1.14698		30.7	6	6	1.3089	0.388355	21.69	8	29.6	6	6	1.09149	0.126297	20.001	8	30.3	6	6	1.2425	0.313246	14.364	11
	2907	Tb927.6.3100	Tb927.6.3100		hypothetical protein, conserved	48.134	17.9	0	13.607	1				0.305893	0.07145	1.146		15.2	4	4	1.35058	0.433584	2.774	4	15.2	4	4	1.26844	0.343055	22.532	4	7.4	2	2	1.1027	0.14104	73.349	5
	1188	Tb927.11.10110	Tb927.11.10110		actin-like protein, putative	43.483	15.2	0	13.034	1				-0.309359	0.0715857	1.14517		8.1	2	2	0.911079	-0.134352	14.29	3	8.1	2	2	0.761905	-0.392317	15.872	2	7.1	2	2	0.75712	-0.401406	20.74	2
	2981	Tb927.6.4590;Tb11.v5.0810	Tb927.6.4590;Tb11.v5.0810		glutamyl-tRNA synthetase, putative;glutamyl-tRNA synthetase, putative	68.931	54	0	122.91	2				0.321197	0.0716945	1.14451		47	22	22	1.39416	0.479392	18.641	29	43.8	21	21	1.24827	0.319928	13.252	29	37.6	19	19	1.1206	0.164271	29.87	28
	3190	Tb927.7.3940	Tb927.7.3940	MCP16	mitochondrial carrier protein,adenine nucleotide mitochondrial translocator, putative (MCP16)	36.34	49.2	0	263.98	1		1		-0.232328	0.0717713	1.14405		49.2	16	16	0.83696	-0.256769	11.205	41	45.9	13	13	0.794344	-0.332164	12.828	39	28.1	9	9	0.92784	-0.108052	11.836	22
	2919	Tb927.6.3330	Tb927.6.3330		hypothetical protein, conserved	33.354	13.1	0	14.359	1				-0.522639	0.0720875	1.14214		13.1	3	3	0.725374	-0.463204	8.6774	3	13.1	3	3	0.668003	-0.582074	22.435	3	0	0	0	NaN		NaN	0
	4056	Tb927.9.8420;Tb927.9.8070	Tb927.9.8420;Tb927.9.8070		60S ribosomal protein L10, putative,QM-like protein;60S ribosomal protein L10, putative,QM-like protein (QM)	24.736	63.4	0	181.23	2			1	0.326119	0.07218	1.14158		63.4	19	19	1.3082	0.387581	14.064	75	62.9	18	18	1.10487	0.143883	12.145	69	54.5	16	16	1.3631	0.446891	24.638	62
	3221	Tb927.7.4470	Tb927.7.4470		hypothetical protein, conserved	22.398	18.7	0	8.9448	1				-0.199254	0.0722618	1.14109		5.2	1	1	0.806647	-0.309991	5.8958	2	5.2	1	1	0.918358	-0.122871	NaN	1	18.7	3	3	0.89199	-0.1649	16.628	5
	815	Tb927.10.2370	Tb927.10.2370	LA	RNA-binding protein, putative (LA)	37.659	61.2	0	166.36	1				0.416585	0.0726175	1.13896		61.2	17	17	1.55851	0.640164	10.744	32	58.5	16	16	1.29648	0.374599	18.823	31	59.4	15	15	1.1769	0.234992	23.73	26
	3111	Tb927.7.2550	Tb927.7.2550	RPT5	proteasome regulatory ATPase subunit 5 (RPT5)	49.149	37.5	0	65.836	1				0.493049	0.0728987	1.13728		34.8	12	12	1.69133	0.75816	7.5502	20	30.3	10	10	1.35988	0.443477	10.973	14	27.2	11	11	1.2121	0.277509	23.597	15
	3534	Tb927.8.4820;Tb11.v5.0659	Tb927.8.4820;Tb11.v5.0659	eIF4G3	eukaryotic translation initation factor 4 gamma, putative;hypothetical protein, conserved	69.338	52.6	0	167.29	2				0.348878	0.0730675	1.13628		46.3	22	22	1.45243	0.538471	18.464	33	46.3	21	21	1.14845	0.199686	30.337	30	36	19	19	1.2384	0.308477	35.702	29
	2058	Tb927.2.3580	Tb927.2.3580	TFIIS2-1	transcription elongation factor s-II, putative (TFIIS2-1)	52.172	40	0	103.79	1				0.100384	0.0731793	1.13561		40	13	13	1.10254	0.140826	33.792	16	31.3	11	11	1.08341	0.115582	30.596	17	18	7	7	1.0315	0.0447438	63.427	9
	741	Tb927.10.15360	Tb927.10.15360		hypothetical protein, conserved	191.99	13.2	0	93.662	1				0.479897	0.0732951	1.13492		13.2	15	15	1.67532	0.744439	35.217	17	9.2	11	11	1.33177	0.413346	28.96	13	6.6	9	9	1.2158	0.281906	28.013	10
	2388	Tb927.3.840	Tb927.3.840		hypothetical protein, conserved	42.481	2.6	0.0033419	2.087	1				1.05264	0.073348	1.13461		2.6	1	1	1.90636	0.93082	NaN	1	2.6	1	1	2.25708	1.17446	NaN	1	0	0	0	NaN		NaN	0
	3096	Tb927.7.2300	Tb927.7.2300	TbNup132	Nucleoporin (TbNup132)	132.36	25.6	0	93.863	1				-0.103085	0.0733549	1.13457		20.9	16	16	0.941442	-0.0870554	16.342	22	20.5	16	16	0.894775	-0.160404	19.054	20	12.5	12	12	0.95807	-0.0617971	13.867	14
	3768	Tb927.9.11410;Tb927.9.11380	Tb927.9.11410;Tb927.9.11380		unspecified product;unspecified product	14.962	74.1	0	99.121	2				0.333968	0.0734345	1.1341		74.1	13	13	1.35591	0.439265	11.07	47	74.1	13	13	1.10386	0.14256	14.465	47	70.5	9	9	1.338	0.420078	11.054	33
	2257	Tb927.3.3320;Tb927.3.3310	Tb927.3.3320;Tb927.3.3310		60S ribosomal protein L13, putative;60S ribosomal protein L13, putative	25.427	49.1	0	172.67	2				0.301018	0.0734999	1.13371		43.1	12	12	1.21461	0.280492	9.5372	57	43.1	12	12	1.11931	0.162606	6.4862	55	42.2	11	11	1.3755	0.459956	16.592	40
	1918	Tb927.11.8160	Tb927.11.8160		dynein heavy chain, putative	473.83	12.8	0	103.03	1				-0.166983	0.0735899	1.13318		10.4	30	30	0.915835	-0.126841	14.043	41	9.7	30	30	0.833611	-0.262553	22.383	35	6.2	21	20	0.92559	-0.111555	20.048	24
	2807	Tb927.6.1090	Tb927.6.1090	RPT3	proteasome regulatory ATPase subunit 3 (RPT3)	44.859	63	0	83.505	1				0.442335	0.073829	1.13177		63	17	15	1.61781	0.694041	12.904	32	56.6	14	12	1.27476	0.350228	11.892	24	61.3	16	15	1.2165	0.282736	18.515	23
	892	Tb927.10.3790;Tb11.v5.0583;Tb11.v5.0603	Tb927.10.3790		hypothetical protein, conserved	432.89	8.1	0	80.231	3			1	0.184421	0.0740612	1.13041		5.9	16	16	1.21283	0.278374	18.302	21	6.1	16	16	1.0675	0.0942332	20.515	20	4.4	12	12	1.1334	0.180657	19.844	16
	527	Tb927.10.11300	Tb927.10.11300	PFC16	paraflagellar rod component, putative (PFC16)	14.328	85.7	0	215.14	1				-0.167014	0.0741375	1.12996		85.7	9	9	0.920048	-0.120219	12.042	48	85.7	9	9	0.833125	-0.263395	6.914	45	85.7	9	9	0.92183	-0.117427	5.6459	29
	528	Tb927.10.11310	Tb927.10.11310	IFT57/55	intraflagellar transport protein IFT55/IFT57, putative (IFT57/55)	46.366	46.7	0	47.543	1				0.431824	0.0741916	1.12965		40.2	9	9	1.58781	0.667034	8.4976	11	17.2	5	5	1.30664	0.385865	29.744	6	22.8	8	8	1.1831	0.242572	39.016	9
	1811	Tb927.11.6070	Tb927.11.6070		hypothetical protein, conserved	43.467	33.3	0	27.255	1				-0.33031	0.0742547	1.12928		28.1	7	7	0.735889	-0.442439	40.83	10	31	8	8	0.753693	-0.407951	15.462	8	24.5	7	7	0.90718	-0.140539	14.729	9
	3799	Tb927.9.12630;Tb927.9.12590;Tb927.9.12570;Tb927.9.12550;Tb927.9.12610	Tb927.9.12630;Tb927.9.12590;Tb927.9.12570;Tb927.9.12550;Tb927.9.12610	glk1	glycerol kinase, glycosomal (glk1);glycerol kinase, glycosomal (glk1);glycerol kinase, glycosomal (glk1);glycerol kinase, glycosomal (glk1);glycerol kinase, glycosomal (glk1)	56.426	77	0	323.31	5				0.515835	0.0743149	1.12892		76.8	37	37	1.31966	0.400168	12.373	143	77	39	39	1.75519	0.811624	14.099	156	60	32	32	1.262	0.335712	14.375	114
	3014	Tb927.6.560	Tb927.6.560	TbcatB	cysteine peptidase C (CPC),CPC cysteine peptidase, Clan CA, family C1, Cathepsin B-like (TbcatB)	37.223	8.5	0	7.3416	1				-0.859806	0.0743992	1.12843		4.1	1	1	0.415973	-1.26544	NaN	1	4.4	1	1	0.533646	-0.906044	NaN	1	4.4	1	1	0.7537	-0.407938	NaN	1
	3943	Tb927.9.3620	Tb927.9.3620		hypothetical protein, conserved	25.222	15.2	0	11.901	1				-0.217191	0.074869	1.1257		15.2	3	3	0.898392	-0.154583	20.936	4	10	2	2	0.788271	-0.343237	10.33	3	6.1	1	1	0.89891	-0.153751	NaN	1
	3498	Tb927.8.4140	Tb927.8.4140		hypothetical protein, conserved	47.021	3.9	0	3.8519	1				0.799161	0.0749	1.12552		3.9	1	1	2.27873	1.18823	38.692	2	3.9	1	1	1.30661	0.385827	NaN	1	3.9	1	1	1.7696	0.823423	17.261	2
	3795	Tb927.9.12360	Tb927.9.12360	RBP35	RNA-binding protein, putative (RBP35)	61.658	19.6	0	31.768	1				0.294052	0.0750253	1.12479		17	9	9	1.34297	0.425424	31.58	11	10.4	7	7	1.09715	0.133765	9.6613	11	11.6	4	4	1.2509	0.322966	31.933	4
	721	Tb927.10.14990	Tb927.10.14990	IFT80	intraflagellar transport protein IFT80/CHE2, putative (IFT80)	86.676	26.5	0	51.328	1				0.370547	0.0750488	1.12466		20.3	13	13	1.47606	0.56175	12.818	21	21.5	11	11	1.28408	0.360731	25.237	17	12	7	7	1.1401	0.18916	63.957	11
	2553	Tb927.4.450	Tb927.4.450	TbCoatomerAlpha	coatomer alpha subunit, putative (TbCoatomerAlpha)	132.85	40.1	0	139.05	1			1	0.426045	0.0750924	1.1244		30.6	24	24	1.52847	0.612086	23.184	35	26.2	21	21	1.38955	0.474613	17.678	31	22.9	18	18	1.1419	0.191436	15.294	26
	3363	Tb927.8.1190;Tb927.8.1170;Tb11.v5.0871	Tb927.8.1190;Tb927.8.1170;Tb11.v5.0871		hypothetical protein, conserved;hypothetical protein, conserved;hypothetical protein, conserved	36.419	55	0	231.42	3				0.388125	0.0751242	1.12422		49.5	9	9	1.52379	0.607661	19.499	26	44.7	9	9	1.17532	0.233057	33.929	24	32.6	8	8	1.2515	0.323658	9.9168	13
	840	Tb927.3.1370;Tb927.10.2840	Tb927.3.1370;Tb927.10.2840		40S ribosomal protein S25, putative;ribosomal protein S25, putative	12.56	38.1	0	89.692	2				0.298669	0.0754343	1.12243		36.3	5	5	1.25959	0.332953	13.629	18	36.3	4	4	1.09713	0.133733	26.036	17	38.1	6	6	1.3466	0.429321	21.027	17
	2051	Tb927.2.3080	Tb927.2.3080		fatty acid desaturase, putative,oleate desaturase, putative	47.078	25.2	0	23.108	1				-0.168084	0.0754453	1.12237		20.3	7	7	0.867378	-0.205267	7.6345	12	20.3	7	7	0.853825	-0.227988	9.0887	11	20.3	7	7	0.95198	-0.0709968	14.054	10
	2845	Tb927.6.1900	Tb927.6.1900	enp1	U3/U14 snoRNA-associated small subunit rRNA processing protein, putative	52.9	33.5	0	39.836	1				0.346697	0.0755031	1.12203		30.5	11	11	1.45121	0.537257	13.298	18	24.8	9	9	1.14311	0.192958	10.714	12	13.1	5	5	1.2396	0.309875	38.289	9
	1768	Tb927.11.5190	Tb927.11.5190		leucine-rich repeat protein (LRRP), putative	168.29	1.9	0.0084346	1.6203	1				-0.0960748	0.0757051	1.12088		1.9	2	2	0.945448	-0.0809306	26.717	4	1.9	2	2	0.961354	-0.0568609	3.6811	2	1.9	2	2	0.90098	-0.150433	7.6367	2
	773	Tb927.10.170	Tb927.10.170		pseudouridine synthase, Cbf5p	48.285	58.1	0	196.27	1				0.134463	0.0757586	1.12057		56.2	20	20	1.15432	0.207045	18.489	34	49.9	17	17	1.05128	0.0721491	19.29	31	48.9	15	15	1.0899	0.124196	26.319	28
	214	Tb927.10.6080;Tb11.v5.0200	Tb927.10.6080;Tb11.v5.0200	PRCE	proteasome beta 5 subunit, putative,proteasome beta 5 subunit (PRCE);proteasome beta 5 subunit, putative	34.416	37.7	0	50.973	2				0.228743	0.0759259	1.11961		30	7	7	1.269	0.343696	21.798	18	25.2	5	5	1.1733	0.230567	6.767	13	34.5	7	7	1.0807	0.111966	8.1417	13
	1172	Tb927.11.4300;Tb927.10.9880	Tb927.11.4300;Tb927.10.9880	RPL18	60S ribosomal protein L18, putative (RPL18);60S ribosomal protein L18, putative (TbL18LP)	21.874	49.7	0	149.59	2				0.306973	0.0759653	1.11939		49.7	11	11	1.2497	0.321586	10.429	51	49.7	11	11	1.10545	0.144632	14.077	46	40.9	8	8	1.3705	0.454702	4.7851	26
	641	Tb927.10.13710	Tb927.10.13710		hypothetical protein, conserved	37.612	26.6	0	47.22	1				0.498084	0.0762425	1.1178		26.6	8	8	1.72393	0.785701	18.901	20	26	6	6	1.31777	0.398094	8.9902	12	16.6	5	5	1.2401	0.310456	17.924	10
	375	Tb927.1.1170	Tb927.1.1170	RPB12	DNA-directed RNA polymerase 2, RPB12 subunit (RBP12)	9.1112	22	0	8.8049	1				-0.111036	0.0765992	1.11578		22	1	1	0.934579	-0.0976109	17.441	3	22	1	1	0.917347	-0.124461	2.1955	3	0	0	0	NaN		NaN	0
	1584	Tb927.11.1980	Tb927.11.1980	ZC3H41	zinc finger protein family member, putative (ZC3H41)	58.459	59	0	279.51	1				0.24453	0.076653	1.11547		55.7	29	29	1.29933	0.377763	43.061	72	56.7	27	27	1.09509	0.131045	9.3389	67	42.4	19	19	1.1686	0.224781	13.668	52
	2604	Tb927.4.760	Tb927.4.760		gamma-adaptin 1, putative,AP-1 adapter complex gamma subunit, putative	87.344	23.6	0	32.617	1			1	0.172422	0.0768945	1.1141		16.1	8	8	1.20324	0.266923	19.491	11	20.1	10	10	1.06652	0.0929094	24.173	13	13.1	6	6	1.1153	0.157432	9.3509	7
	1624	Tb927.11.260	Tb927.11.260	PIFTF6	predicted WD40 repeat protein (PIFTF6)	149.06	13.5	0	47.388	1				0.544044	0.0770306	1.11334		11.7	10	10	1.60036	0.678395	38.442	13	7.8	7	7	1.16842	0.224553	60.212	12	5.4	5	5	1.6577	0.729183	20.893	6
	2436	Tb927.4.1850	Tb927.4.1850		hypothetical protein, conserved	64.384	38.4	0	80.045	1			1	0.240033	0.0772081	1.11234		27.3	10	10	1.30041	0.378963	31.296	11	30.1	12	12	1.14462	0.194873	14.583	14	29.2	11	11	1.1067	0.146264	48.42	17
	1652	Tb927.11.3070	Tb927.11.3070		hypothetical protein, conserved	64.324	30	0	64.858	1				0.359566	0.0773051	1.11179		22.7	9	9	1.45083	0.53688	28.848	8	8.5	4	4	1.12469	0.169534	14.258	5	14.6	6	6	1.2944	0.372283	24.192	7
	243	Tb927.7.4570;Tb11.v5.0270	Tb927.7.4570;Tb11.v5.0270	IG-NH	inosine-guanine nucleoside hydrolase (IG-NH);nucleoside hydrolase, putative	39.39	46.8	0	127.82	2				0.380035	0.077403	1.11124		46.8	12	12	1.49029	0.575594	5.388	26	44.8	11	11	1.29966	0.378138	24.812	23	36.7	10	10	1.1379	0.186374	16.542	23
	190	Tb927.7.4740;Tb11.v5.0157	Tb927.7.4740;Tb11.v5.0157		hypothetical protein, conserved;hypothetical protein, conserved	36.468	6	0	5.9353	2				-0.405848	0.0774059	1.11123		6	1	1	0.781189	-0.356257	NaN	1	6	1	1	0.729288	-0.455439	NaN	1	0	0	0	NaN		NaN	0
	3546	Tb927.8.5070	Tb927.8.5070		hypothetical protein, conserved	14.117	36	0	13.498	1				0.355938	0.0774505	1.11098		28	4	4	1.2692	0.343916	27.977	9	28	4	4	1.13281	0.179907	18.494	9	8	1	1	1.458	0.543991	NaN	1
	723	Tb927.10.15000	Tb927.10.15000		hypothetical protein, conserved	48.002	44.1	0	70.071	1				-0.219671	0.0778339	1.10883		33.4	9	9	0.868056	-0.204141	7.8256	14	35.1	10	10	0.790326	-0.33948	20.876	16	13.7	5	5	0.92313	-0.115394	37.146	7
	1236	Tb927.11.10820	Tb927.11.10820		protein kinase ck2 regulatory subunit, putative,casein kinase II beta chain, putative	33.52	15	0	4.8498	1				0.527448	0.0781698	1.10696		12.2	2	2	1.37779	0.462356	107.81	3	0	0	0	NaN		NaN	0	8.2	2	2	1.5079	0.592541	41.94	2
	1670	Tb927.11.3360	Tb927.11.3360		hypothetical protein, conserved	102.85	14.1	0	32.745	1				-0.180913	0.0782047	1.10677		14.1	9	9	0.824878	-0.277747	19.042	10	9.2	5	5	0.886918	-0.173128	9.2613	6	6.1	3	3	0.93831	-0.0918634	27.848	3
	3095	Tb927.7.240;Tb927.7.230	Tb927.7.240;Tb927.7.230		40S ribosomal protein S33, putative;40S ribosomal protein S33, putative	11.17	44.7	0	31.809	2				0.285074	0.0782184	1.10669		44.7	4	4	1.33236	0.41398	3.3343	20	44.7	4	4	1.09067	0.125211	3.4835	17	44.7	4	4	1.2449	0.31603	17.8	15
	2915	Tb927.6.3220;Tb11.v5.0720	Tb927.6.3220;Tb11.v5.0720		hypothetical protein, conserved;hypothetical protein, conserved	115.74	13.2	0	19.202	2				-0.303869	0.0784807	1.10524		11.4	6	6	0.908843	-0.137897	25.363	6	10.8	6	6	0.798786	-0.324119	13.018	7	7.7	4	4	0.73225	-0.449592	6.1284	3
	2123	Tb927.2.560	Tb927.2.560		retrotransposon hot spot protein 4 (RHS4), putative	95.911	23.7	0	20.69	1				0.312448	0.0786285	1.10442		17.9	17	3	1.41283	0.498586	6.5974	5	15.1	15	2	1.17121	0.227996	5.262	3	17.3	16	3	1.1573	0.210763	10.81	6
	3759	Tb927.9.11140	Tb927.9.11140		hypothetical protein, conserved	51.895	14.7	0	8.0574	1				-0.36537	0.0788562	1.10316		9.5	4	4	0.862069	-0.214125	8.8041	5	9.7	3	3	0.809651	-0.304628	5.8791	5	4.8	2	2	0.67019	-0.577358	43.001	4
	2864	Tb927.6.2210	Tb927.6.2210		hypothetical protein, conserved	123.85	28.5	0	113.51	1				0.403583	0.0788637	1.10312		22.8	15	15	1.56292	0.64424	14.977	21	20.7	13	13	1.20539	0.269495	15.695	20	15.2	13	13	1.2286	0.297015	21.588	22
	1374	Tb927.11.13610	Tb927.11.13610		hypothetical protein, conserved	15.688	32.1	0	9.9991	1				-0.461229	0.0791199	1.10171		32.1	3	3	0.77821	-0.361768	15.193	4	21.9	2	2	0.601214	-0.734048	2.5143	2	21.9	2	2	0.81911	-0.287871	19.5	3
	1473	Tb927.11.15420	Tb927.11.15420		hypothetical protein, conserved	23.057	55.1	0	140.68	1				0.238963	0.0791608	1.10149		44.9	8	8	1.23808	0.308109	10.795	20	50.2	8	8	1.06872	0.095882	9.2476	18	46.8	9	9	1.2422	0.312897	20.067	13
	382	Tb927.1.1420	Tb927.1.1420		hypothetical protein, conserved	70.98	20.5	0	48.105	1				0.32171	0.0791746	1.10141		19.3	7	7	1.39895	0.484348	39.204	15	14.6	6	6	1.11027	0.150914	26.147	12	14	6	6	1.2569	0.32987	84.681	12
	4111	Tb927.9.9780	Tb927.9.9780		peptidyl-prolyl cis-trans isomerase (cyclophilin- 40), putative,cyclophilin-40, putative	38.095	36.2	0	39.391	1				0.733657	0.0792233	1.10115		30.8	8	8	2.14151	1.09863	51.814	11	26.3	7	7	1.69739	0.763318	44.383	8	26.8	7	7	1.2649	0.339023	28.015	8
	3003	Tb927.6.5000	Tb927.6.5000		hypothetical protein, conserved	44.275	19.5	0	32.84	1				-0.0788532	0.0793029	1.10071		14	4	4	0.97561	-0.0356239	19.925	7	16.5	5	5	0.922084	-0.11703	14.293	8	8.6	3	3	0.9435	-0.0839057	12.048	5
	1944	Tb927.11.8880	Tb927.11.8880		hypothetical protein, conserved	40.692	19.5	0	16.416	1				0.990518	0.0793275	1.10058		19.5	5	5	2.99267	1.58143	37.617	9	8.7	2	2	1.67777	0.746543	51	2	7.7	2	2	1.5622	0.643579	84.693	3
	2441	Tb927.4.1930;REV__Tb927.11.13360	Tb927.4.1930	EIF3D	RNA-binding protein, putative (EIF3D)	31.293	50	0	87.065	2				0.151304	0.0793297	1.10056		32.7	10	10	1.05909	0.0828203	21.915	17	39	9	9	1.09735	0.134018	11.246	13	39.3	11	11	1.1786	0.237074	20.612	21
	1442	Tb927.11.14900	Tb927.11.14900		coatomer epsilon subunit, putative,cytosolic coat protein, putative	34.594	40.1	0	89.89	1				0.373841	0.07971	1.09849		29.6	8	8	1.50141	0.586319	14.965	9	21.3	6	6	1.25794	0.331064	14.338	8	33	9	9	1.152	0.204141	37.163	11
	3072	Tb927.7.1730;Tb927.7.1750;Tb927.7.1740	Tb927.7.1730;Tb927.7.1750;Tb927.7.1740		60S ribosomal protein L7, putative;60S ribosomal protein L7, putative;60S ribosomal protein L7, putative	27.713	63.2	0	112.22	3				0.257845	0.0797816	1.0981		59.5	18	17	1.22829	0.296651	18.657	63	63.2	19	18	1.07803	0.108394	9.655	62	51.7	15	15	1.291	0.368489	10.259	47
	2280	Tb927.3.3690	Tb927.3.3690		flagellar radial spoke protein-like, putative	60.992	42.5	0	90.231	1				-0.218852	0.0798576	1.09768		42.5	16	16	0.831808	-0.265677	19.092	33	25.7	12	12	0.811096	-0.302056	13.116	24	23.5	10	10	0.94029	-0.0888224	45.324	21
	1150	Tb927.10.9440	Tb927.10.9440	54 NDH2	NADH dehydrogenase (54 NDH2)	54.351	64.2	0	288.85	1			1	-0.156239	0.0802391	1.09561		64.2	23	23	0.841397	-0.249142	51.049	55	64	22	22	0.935716	-0.0958569	12.747	49	64	23	23	0.91782	-0.123717	13.355	42
	2032	Tb927.2.2370	Tb927.2.2370		hypothetical protein, conserved	151.54	2.1	0	7.5879	1				0.666975	0.0804544	1.09445		1.4	1	1	1.46722	0.553088	NaN	1	1.4	1	1	1.30952	0.389035	NaN	1	0.7	1	1	2.0832	1.0588	NaN	1
	3662	Tb927.8.7020	Tb927.8.7020		peptidase, putative,metallo-peptidase, Clan ME, Family M16	118.86	22.8	0	70.297	1				0.575649	0.0806258	1.09353		19.1	12	12	1.81703	0.861579	27.314	13	16.4	11	11	1.52096	0.604981	16.697	12	12.5	9	9	1.1978	0.260387	36.292	11
	3419	Tb927.8.2210	Tb927.8.2210	PTR1	pteridine reductase (PTR1)	28.47	20.9	0	7.2995	1				0.765663	0.0807322	1.09295		12.3	2	2	1.58892	0.668043	9.4394	2	20.9	3	3	1.81917	0.863284	21.105	4	0	0	0	NaN		NaN	0
	2778	Tb927.5.570	Tb927.5.570		hypothetical protein, conserved	233.39	3.7	0	12.601	1				-0.328432	0.0807912	1.09264		2.4	4	4	0.837872	-0.255199	10.055	6	3	5	5	0.69483	-0.525267	26.489	7	3.7	6	6	0.86764	-0.204832	8.1709	6
	149	Tb09.v4.0067	Tb09.v4.0067		retrotransposon hot spot protein, pseudogene,chrIX additional, unordered contigs	62.718	8.9	0	3.9568	1				0.343496	0.080829	1.09243		8.9	6	1	1.46406	0.549979	4.9409	2	8.9	6	1	1.1627	0.217474	13.224	3	8.9	6	1	1.2	0.263034	NaN	1
	715	Tb927.10.14870	Tb927.10.14870		hypothetical protein, conserved	75.914	18.6	0	81.951	1				0.350632	0.0809787	1.09163		18.6	9	9	1.47117	0.556966	11.812	16	15.3	7	7	1.15088	0.202738	9.1921	12	7	4	4	1.2245	0.292193	58.786	7
	1051	Tb927.10.7600	Tb927.10.7600		hypothetical protein, conserved	41.02	11.5	0	5.3855	1				-0.303291	0.0810131	1.09144		4.1	1	1	0.724848	-0.46425	20.045	2	4.1	1	1	0.812216	-0.300065	7.9958	2	11.5	3	3	0.90403	-0.145557	16.708	3
	3614	Tb927.9.14370;Tb927.8.6180	Tb927.9.14370;Tb927.8.6180		60S ribosomal protein L26, putative;60S ribosomal protein L26, putative	16.454	32.9	0	35.534	2			1	0.293272	0.0811875	1.09051		32.9	6	6	1.34962	0.432552	8.2676	27	32.9	6	6	1.09234	0.127416	10.246	28	32.2	5	5	1.2482	0.319849	11.182	14
	3385	Tb927.8.1590	Tb927.8.1590	upl3	ubiquitin-protein ligase, putative (upl3)	470.71	4.8	0	48.597	1			1	0.487973	0.0812303	1.09028		3.6	12	12	1.70329	0.768322	16.046	16	2	7	7	1.34862	0.431481	14.051	10	2.3	8	8	1.2009	0.264116	22.611	9
	964	Tb927.10.5780	Tb927.10.5780		amino acid tansporter, putative	62.653	7.5	0	4.1015	1				0.220007	0.0813941	1.08941		3	1	1	1.09824	0.13519	NaN	1	7.5	2	2	1.27641	0.352087	45.571	3	3	1	1	1.1272	0.172744	12.682	2
	3475	Tb927.8.3470	Tb927.8.3470		hypothetical protein, conserved	26.369	35.9	0	37.307	1				-0.0609347	0.0814007	1.08937		35.9	6	6	0.95057	-0.0731348	22.538	8	25.6	4	4	0.942685	-0.0851526	18.663	4	27.4	5	5	0.98315	-0.0245166	15.715	5
	223	Tb927.5.360;Tb11.v5.0231;Tb927.5.390;Tb927.5.370;Tb11.v5.0230;Tb11.v5.0228;Tb927.5.400;Tb927.5.350;Tb11.v5.0421;Tb11.v5.0227	Tb927.5.360;Tb11.v5.0231;Tb927.5.390;Tb927.5.370;Tb11.v5.0230;Tb11.v5.0228	ISG75	75 kDa invariant surface glycoprotein (ISG75);75 kDa invariant surface glycoprotein, putative;75 kDa invariant surface glycoprotein, putative;75 kDa invariant surface glycoprotein, putative (ISG75);75 kDa invariant surface glycoprotein, putative;75 kD	58.225	7.6	0.0013594	2.7831	10				0.913866	0.0815386	1.08864		3.8	1	1	1.86223	0.897033	NaN	1	5.5	2	2	2.64641	1.40404	NaN	1	2.1	1	1	1.3571	0.440527	21.655	2
	1649	Tb927.9.9210;Tb927.11.3000	Tb927.9.9210;Tb927.11.3000		60S ribosomal protein L37, putative;60S ribosomal protein L37, putative	10.1	28.6	0	6.8886	2			1	0.348737	0.0815436	1.08861		28.6	3	3	1.37351	0.457871	6.6252	13	28.6	3	3	1.09914	0.136379	3.8706	15	28.6	3	3	1.3679	0.451963	12.207	9
	904	Tb927.10.4060	Tb927.10.4060		hypothetical protein, conserved	39.938	23.4	0	45.344	1				0.740648	0.0817051	1.08775		19.6	5	5	2.22341	1.15277	9.2498	5	10.6	3	3	1.61825	0.694438	14.621	3	15.8	4	4	1.2966	0.374733	54.648	5
	371	Tb927.1.1050;Tb11.v5.0536	Tb927.1.1050;Tb11.v5.0536		hypothetical protein, conserved;hypothetical protein, conserved	126.7	3.6	0.0091675	1.6051	2				0.172672	0.0817165	1.08769		2.1	2	2	1.08742	0.120906	23.959	2	3.6	3	3	1.21247	0.277954	21.871	4	1	1	1	1.0861	0.119157	52.707	2
	1934	Tb927.11.850	Tb927.11.850		protein kinase, putative	27.013	11.4	0.0020833	2.2816	1				0.461742	0.0817843	1.08733		11.4	3	3	1.54722	0.629679	37.206	3	8.5	2	2	1.48825	0.573617	2.1228	2	2.8	1	1	1.1344	0.181929	NaN	1
	3509	Tb927.8.4280	Tb927.8.4280		nuclear transport factor 2, putative	13.907	66.1	0	49.288	1				0.272969	0.0818346	1.08706		42.7	4	4	1.35615	0.43952	16.097	7	66.1	5	5	1.13845	0.187066	17.076	9	18.5	2	2	1.1426	0.192321	22.851	3
	3530	Tb927.8.4770	Tb927.8.4770	TbRAB18	small GTP-binding protein Rab18 (TbRAB18)	23.467	28.8	0	11.008	1				0.0764444	0.0818354	1.08706		19.1	4	4	1.0716	0.0997727	7.4441	4	19.1	4	4	1.02087	0.0297942	6.0343	4	20.5	3	3	1.0716	0.0997664	52.33	3
	2493	Tb927.4.2920	Tb927.4.2920		hypothetical protein, conserved	107.59	6.6	0	5.3169	1				-0.119672	0.0818376	1.08705		5.1	3	3	0.910581	-0.135141	15.089	2	5.6	3	3	0.930319	-0.104202	40.949	4	0	0	0	NaN		NaN	0
	3771	Tb927.9.11600;Tb927.9.11580	Tb927.9.11600;Tb927.9.11580	gim5B	unspecified product (gim5B);Gim5A protein,glycosomal membrane protein (gim5A)	25.975	72.6	0	323.31	2				0.313289	0.0818604	1.08693		71.8	14	14	1.23138	0.300271	6.769	71	72.2	14	14	1.3996	0.485014	9.4285	69	40.2	7	7	1.1131	0.154583	28.37	20
	3713	Tb927.8.900	Tb927.8.900	TSR1	splicing factor TSR1 (TSR1)	37.469	30.5	0	62.297	1				0.393297	0.0819717	1.08634		28	11	11	1.51128	0.595773	20.314	25	28	11	11	1.13295	0.180087	11.306	22	22.3	8	8	1.3232	0.404031	19.062	16
	1881	Tb927.11.7350	Tb927.11.7350	H2BVAR	histone H2B variant, putative (H2BVAR)	15.786	35.7	0	36.221	1				-0.278674	0.0820257	1.08605		35.7	5	5	0.920386	-0.119688	27.685	11	35.7	5	5	0.752106	-0.410992	14.247	13	35.7	5	5	0.80925	-0.305343	32.043	12
	2455	Tb927.4.2170	Tb927.4.2170		hypothetical protein, conserved	14.463	26	0	9.608	1				-0.182288	0.0821864	1.0852		26	2	2	0.878349	-0.187134	14.519	3	26	2	2	0.943841	-0.0833836	21.115	3	26	2	2	0.82568	-0.276345	11.661	2
	2995	Tb927.6.4780	Tb927.6.4780		DNA ligase I, putative	82.67	8.8	0	18.775	1				0.680448	0.0823366	1.08441		7.2	4	4	1.56593	0.647016	63.445	7	2	1	1	1.26354	0.337466	NaN	1	3.4	2	2	2.0804	1.05686	NaN	1
	3012	Tb927.6.5130;Tb927.6.5120	Tb927.6.5130;Tb927.6.5120		60S acidic ribosomal protein P2, putative;60S acidic ribosomal protein P2, putative	10.444	96.3	0	96.237	2				0.317476	0.082391	1.08412		96.3	8	8	1.37897	0.463589	6.6141	24	96.3	8	8	1.09677	0.133258	10.359	21	96.3	9	9	1.2795	0.35558	25.648	25
	1196	Tb927.11.1020	Tb927.11.1020		ribokinase, putative	35.288	60.1	0	294	1				0.220953	0.0824214	1.08396		60.1	14	14	1.22897	0.297449	8.1095	57	60.1	14	14	1.21372	0.279441	13.109	60	52	12	12	1.0614	0.0859685	16.834	37
	1507	Tb927.11.15990	Tb927.11.15990	TbNup109	nucleoporin Nup109 (TbNup109)	108.72	39.6	0	170.02	1				-0.127632	0.0827391	1.08229		32.7	22	22	0.901713	-0.149259	34.774	36	33.2	25	25	0.881446	-0.182057	26.136	37	31.7	23	23	0.96488	-0.0515786	19.122	31
	1779	Tb927.11.540	Tb927.11.540	ABCB10	ABC transporter, putative (ABCB10)	76.244	30.5	0	177.12	1				-0.17022	0.0828017	1.08196		28.7	12	12	0.876501	-0.190172	85.655	19	23	9	9	0.841397	-0.249142	15.191	13	26.2	10	10	0.95175	-0.0713455	14.735	18
	1245	Tb927.11.10990	Tb927.11.10990		translation initiation factor 2 subunit, putative	42.136	18.4	0	28.021	1				0.470447	0.0828417	1.08175		15.5	4	4	1.52179	0.605771	0.7513	5	11.4	3	3	1.54116	0.624021	11.025	4	11.9	3	3	1.1341	0.181548	25.292	4
	455	Tb927.1.4720	Tb927.1.4720		hypothetical protein, conserved	69.335	13.5	0	12.06	1				1.03738	0.082949	1.08119		13.5	5	5	2.2553	1.17332	46.559	6	2.2	1	1	1.86794	0.901446	NaN	1	0	0	0	NaN		NaN	0
	1023	Tb927.10.7110	Tb927.10.7110		inositol-3-phosphate synthase, putative	58.274	10.4	0	6.6923	1				0.419481	0.083342	1.07914		6.6	1	1	1.42771	0.513708	NaN	1	10.4	2	2	1.49586	0.580979	13.714	2	6.6	1	1	1.1202	0.163756	NaN	1
	599	Tb927.10.12870	Tb927.10.12870		hypothetical protein, conserved	118.83	1.4	0.0015974	2.554	1				0.90127	0.0833988	1.07884		1.4	1	1	2.02795	1.02002	NaN	1	1.4	1	1	1.72013	0.782521	NaN	1	0	0	0	NaN		NaN	0
	3106	Tb927.7.2450	Tb927.7.2450		hypothetical protein, conserved	54.394	9.1	0	14.595	1				0.357146	0.0836057	1.07776		5.4	2	2	1.47325	0.559005	11.882	4	5.4	2	2	1.1322	0.179123	13.645	3	6.2	2	2	1.2599	0.333309	17.789	4
	2514	Tb927.5.1610;Tb927.4.3550	Tb927.5.1610;Tb927.4.3550		60S ribosomal protein L13a, putative;60S ribosomal protein L13a, putative	25.711	41.4	0	51.254	2				0.323334	0.0839392	1.07604		39.2	12	12	1.29953	0.377988	7.7772	42	39.2	12	12	1.09371	0.129229	25.29	40	34.7	9	9	1.3782	0.462785	27.84	20
	264	Tb11.v5.0366	Tb11.v5.0366		hypothetical protein, conserved	120.58	28.7	0	17.708	1				0.332845	0.0840127	1.07566		24.8	13	1	1.36175	0.44546	7.9595	3	15.2	9	1	1.3436	0.426102	2.018	2	21	15	1	1.092	0.126973	18.677	3
	812	Tb927.10.2320	Tb927.10.2320		hypothetical protein, conserved	41.178	22.6	0	45.33	1				-0.117079	0.0841333	1.07503		22.6	4	4	0.912159	-0.132643	14.162	7	18.1	3	3	0.932053	-0.101516	9.7439	7	0	0	0	NaN		NaN	0
	2205	Tb927.3.2200	Tb927.3.2200		hypothetical protein, conserved	38.83	8.6	0	4.2067	1				0.292047	0.0844036	1.07364		5.5	1	1	1.09427	0.129971	3.8191	2	8.6	2	2	1.23333	0.302564	21.637	3	8.6	2	2	1.36	0.443607	NaN	1
	1034	Tb927.10.7340;Tb927.10.7330	Tb927.10.7340;Tb927.10.7330		40S ribosomal protein S24E, putative;40S ribosomal protein S24E, putative	15.683	45.3	0	109.74	2				0.271541	0.0845912	1.07268		39.4	6	6	1.23516	0.304701	31.732	25	45.3	7	7	1.0804	0.11157	9.032	26	45.3	7	7	1.318	0.39835	19.525	19
	906	Tb927.10.4120;Tb927.10.4110	Tb927.10.4120;Tb927.10.4110	RPL30	60S ribosomal protein L30 (RPL30);60S ribosomal protein L30 (RPL30)	11.512	75.2	0	124.15	2				0.332369	0.0848192	1.07151		75.2	8	8	1.33372	0.415461	9.7359	33	66.7	7	7	1.09174	0.126628	5.4429	31	66.7	6	6	1.3708	0.455018	2.9249	18
	2112	Tb927.2.5130	Tb927.2.5130		hypothetical protein, conserved	43.557	30	0	32.465	1				0.177466	0.0853642	1.06872		26.9	9	9	1.17451	0.232057	22.21	10	16.9	5	5	1.17593	0.233803	4.9145	6	8.5	3	3	1.0472	0.066537	20.042	5
	948	Tb927.10.5430	Tb927.10.5430		hypothetical protein, conserved	32.616	27.8	0	8.5065	1				-0.246081	0.0856868	1.06709		20.3	4	4	0.922935	-0.115699	5.4185	5	20.3	4	4	0.767106	-0.382501	16.136	4	12.8	4	4	0.84672	-0.240043	4.9558	6
	402	Tb927.1.2120	Tb927.1.2120		calpain, putative,cysteine peptidase, Clan CA, family C2, putative	82.62	15.7	0	17.532	1				-0.156512	0.0861305	1.06484		11.2	6	6	0.959049	-0.0603242	11.904	8	5.5	3	3	0.857192	-0.22231	0.80112	3	11.6	6	6	0.87849	-0.186902	7.8453	5
	184	Tb927.11.1840;Tb11.1380	Tb927.11.1840;Tb11.1380		hypothetical protein, conserved;hypothetical protein, conserved	45.633	64.9	0	285.36	2				-0.0837998	0.0866397	1.06228		64.7	26	26	0.971345	-0.0419438	11.806	66	64.9	25	25	0.912159	-0.132643	10.843	62	64.4	22	22	0.94815	-0.0768128	8.3567	49
	1793	Tb927.11.5680	Tb927.11.5680		dynein light chain, putative	23.96	58.1	0	99.817	1				-0.20788	0.086839	1.06129		48.1	7	7	0.873973	-0.194339	13.193	11	52.4	8	8	0.796813	-0.327687	19.222	10	41.4	6	6	0.93199	-0.101614	5.6828	13
	3252	Tb927.7.5570;Tb927.7.5580	Tb927.7.5570;Tb927.7.5580	MOB1A	cell cycle associated protein MOB1-A (MOB1A);cell cycle associated protein MOB1-B (MOB1B)	24.609	8.7	0	4.0494	2				0.098095	0.0868782	1.06109		3.8	1	1	1.06041	0.0846245	NaN	1	0	0	0	NaN		NaN	0	8.7	2	2	1.0804	0.111566	68.594	2
	3309	Tb927.7.6910	Tb927.7.6910		hypothetical protein, conserved	92.255	53.3	0	196.19	1				-0.268209	0.0869469	1.06075		46.5	25	25	0.847961	-0.237931	20.125	43	36.3	21	21	0.743439	-0.427713	20.37	32	31.7	18	18	0.90816	-0.138982	17.596	28
	2253	Tb927.3.3230	Tb927.3.3230		hypothetical protein, conserved	67.414	5.3	0	6.4067	1			1	0.433892	0.0869555	1.0607		2.6	1	1	1.4551	0.541114	NaN	1	5.3	2	2	1.11869	0.161815	NaN	1	5.3	2	2	1.5144	0.598746	6.276	2
	454	Tb927.1.4690	Tb927.1.4690	PRMT1	arginine N-methyltransferase (PRMT1)	39.206	38.3	0	83.68	1				0.393591	0.0869749	1.06061		38.3	11	11	1.527	0.610698	14.874	16	38.3	10	10	1.31044	0.390056	8.6196	13	27.5	8	8	1.1329	0.180021	16.825	12
	1491	Tb927.11.15680	Tb927.11.15680		hypothetical protein, conserved	14.492	60.5	0	23.149	1				0.386679	0.087182	1.05957		45	4	4	1.45847	0.544456	29.629	5	60.5	6	6	1.38483	0.46971	24.73	7	38.8	3	3	1.1064	0.145873	11.669	6
	2446	Tb927.4.2020	Tb927.4.2020		mu-adaptin 3, putative,adaptor complex AP-3 medium subunit, putative	47.994	8.5	0.00055127	2.9421	1				0.531619	0.0872182	1.05939		6.1	2	2	1.32485	0.405834	12.835	2	8.5	3	3	1.25205	0.324292	9.4676	3	2.3	1	1	1.821	0.864731	NaN	1
	702	Tb927.10.14610	Tb927.10.14610		leucine-rich repeat protein (LRRP), putative	121.48	11.2	0	31.211	1				-0.362535	0.0873585	1.05869		7.1	5	5	0.889917	-0.168257	4.7428	5	2.1	2	2	0.67563	-0.565695	19.533	3	5.3	5	5	0.7826	-0.353653	13.771	7
	3465	Tb927.8.3250	Tb927.8.3250		dynein heavy chain, putative	537.36	18	0	202.15	1				-0.19544	0.0873725	1.05862		12.3	43	43	0.889838	-0.168385	26.787	51	11.1	36	36	0.804635	-0.313594	22.342	42	11.2	37	37	0.93023	-0.104341	16.042	41
	1804	Tb927.11.5970	Tb927.11.5970		phosphoinositide-specific phospholipase C, putative	80.449	29.8	0	42.121	1				-0.253254	0.0876813	1.05709		25.4	11	11	0.859845	-0.217851	10.617	13	21.7	9	9	0.754318	-0.406754	23.511	10	10.6	6	6	0.91057	-0.135158	22.797	6
	696	Tb927.10.14550	Tb927.10.14550		ATP-dependent DEAD/H RNA helicase, putative	71.366	48.8	0	283.82	1				0.260283	0.0879828	1.0556		47.6	28	27	1.30784	0.387185	37.127	90	46.1	27	26	1.07533	0.104775	12.789	75	42.6	25	24	1.2217	0.28889	16.979	58
	3784	Tb927.9.12070	Tb927.9.12070		hypothetical protein, conserved	109.87	24.4	0	106.48	1			1	0.191936	0.0880213	1.05541		20.5	16	16	1.21409	0.279879	15.538	21	18.5	13	13	1.05307	0.0746081	14.126	21	15	12	12	1.1658	0.22132	20.414	16
	2430	Tb927.4.1720	Tb927.4.1720		nucleoside diphosphate kinase, putative	38.948	28.1	0	25.971	1				-0.160814	0.0882586	1.05424		25.2	6	6	0.951837	-0.0712136	9.6523	8	25.8	6	6	0.84168	-0.248656	9.3026	8	12	3	3	0.89343	-0.162573	13.272	5
	1181	Tb927.11.10030	Tb927.11.10030		60S ribosomal protein L29, putative	8.2224	38	0	22.671	1				0.250641	0.0883139	1.05397		38	3	3	1.21895	0.285636	13.65	8	38	3	3	1.16122	0.215647	9.6145	7	0	0	0	NaN		NaN	0
	3531	Tb927.8.4780	Tb927.8.4780		hypothetical protein, conserved	468.13	23.8	0	183.75	1				-0.162965	0.0884048	1.05352		21.3	37	37	0.927042	-0.109294	39.264	52	17.9	31	31	0.831117	-0.266876	11.164	39	17.9	32	32	0.92484	-0.112724	13.527	47
	3898	Tb927.9.1980	Tb927.9.1980		hypothetical protein, conserved	78.486	9.8	0	16.118	1				-0.249541	0.0886639	1.05225		6.5	4	4	0.929454	-0.105544	11.85	6	5	3	3	0.83375	-0.262313	12.955	4	7.2	4	4	0.76803	-0.380765	4.4089	4
	3996	Tb927.9.5840;Tb927.9.5750	Tb927.9.5840;Tb927.9.5750		unspecified product (TRYP1);unspecified product (TRYP1)	22.424	76.9	0	319.51	2				0.438976	0.0886846	1.05215		76.9	18	18	1.6213	0.697149	17.981	68	76.9	18	18	1.32389	0.404783	7.7781	67	75.9	13	13	1.1607	0.214995	9.6503	38
	2923	Tb927.6.3490	Tb927.6.3490	ZFP1	zinc finger protein (ZFP1)	11.456	9.8	0.00055218	2.9707	1				-0.470825	0.0889764	1.05072		9.8	1	1	0.639304	-0.645425	15.507	5	9.8	1	1	0.661463	-0.596267	14.402	4	9.8	1	1	0.88836	-0.170784	7.9853	4
	1272	Tb927.11.11520	Tb927.11.11520	PEX11	glycosomal membrane protein (PEX11)	24.027	55.5	0	74.999	1				-0.085296	0.0892397	1.04944		55.5	11	11	0.976944	-0.033652	9.0239	34	55.5	11	11	0.915919	-0.126709	10.915	35	34.4	9	9	0.93593	-0.0955274	19.051	25
	984	Tb927.10.6180	Tb927.10.6180		hypothetical protein, conserved	54.878	28.1	0	50.613	1				0.0990286	0.0892403	1.04944		28.1	9	9	1.08534	0.118147	34.711	10	16.4	6	6	1.10336	0.141908	22.521	6	20.8	6	6	1.026	0.0370308	19.083	6
	1675	Tb927.11.3450	Tb927.11.3450		hypothetical protein, conserved	76.311	2.2	0.0020959	2.3459	1			1	0.444891	0.089388	1.04872		2.2	1	1	1.56509	0.646248	NaN	1	2.2	1	1	1.12419	0.168885	NaN	1	2.2	1	1	1.4335	0.519542	NaN	1
	387	Tb927.1.1630	Tb927.1.1630	ELOF1	hypothetical protein, conserved	18.087	26.9	0	6.9627	1				-0.137571	0.0897142	1.04714		16.2	2	2	0.891981	-0.164915	19.182	2	19.4	3	3	0.965251	-0.051024	45.358	4	7.5	1	1	0.8725	-0.196773	NaN	1
	2621	Tb927.5.1100	Tb927.5.1100	TbPEX5	peroxisome targeting signal 1 receptor (TbPEX5)	72.095	39.8	0	109.44	1				0.367694	0.0898293	1.04658		29.5	10	10	1.47532	0.561026	24.185	19	24.6	8	8	1.11174	0.152821	10.479	13	26.9	10	10	1.3097	0.389236	36.123	15
	3717	Tb927.8.990	Tb927.8.990	RBP33	RNA-binding protein, putative (RBP33)	33.963	39	0	31.972	1				0.335193	0.0899562	1.04597		30.2	7	7	1.46426	0.550169	10.308	14	39	8	8	1.15691	0.210279	83.424	14	19.5	4	4	1.1852	0.245131	8.5814	8
	2599	Tb927.4.660	Tb927.4.660		hypothetical protein, conserved	78.751	21.3	0	28.897	1				-0.118886	0.090452	1.04358		18.6	10	10	0.948047	-0.0769695	16.935	11	14.8	8	8	0.87321	-0.1956	22.78	9	9.9	5	5	0.94338	-0.084089	22.992	7
	422	Tb927.1.3110	Tb927.1.3110		soluble N-ethylmaleimide sensitive factor (NSF) attachment protein, putative	32.136	50.2	0	64.536	1				0.211037	0.0906121	1.04281		44.8	9	9	1.16414	0.21927	18.624	16	29.9	6	6	1.06357	0.0889144	27.536	9	34.2	8	8	1.2526	0.324926	19.759	14
	1875	Tb927.11.7140	Tb927.11.7140		cell cycle sequence binding phosphoprotein (RBP45), putative	35.476	3.8	0	10.317	1				0.38974	0.0906751	1.04251		3.8	1	1	1.50582	0.590549	NaN	1	3.8	1	1	1.11511	0.15719	NaN	1	3.8	1	1	1.3393	0.421479	NaN	1
	1606	Tb927.11.2340	Tb927.11.2340		hypothetical protein, conserved	58.674	15	0	13.74	1				-0.107313	0.0906849	1.04246		13.4	7	7	0.974089	-0.0378742	41.023	8	9.1	5	5	0.905633	-0.143002	20.47	6	8	4	4	0.90685	-0.141064	8.7356	4
	1701	Tb927.11.3890	Tb927.11.3890		N(2), N(2)-dimethylguanosine tRNA methyltransferase, putative	78.84	3.2	0	6.1515	1				0.330483	0.0908933	1.04147		1.7	1	1	1.45722	0.543215	15.562	3	1.7	1	1	1.18548	0.245472	8.0898	2	1.5	1	1	1.1509	0.202762	NaN	1
	220	Tb927.5.450;Tb11.v5.0222	Tb927.5.450;Tb11.v5.0222	NUBM	NADH-ubiquinone oxidoreductase, mitochondrial, putative (NUBM);NADH-ubiquinone oxidoreductase, mitochondrial, putative	55.32	16.1	0	7.1792	2			1	-0.924592	0.0910326	1.0408		10.7	3	3	0.35591	-1.49042	0.53782	4	13.9	4	4	0.568925	-0.813689	14.163	4	2.8	1	1	0.72213	-0.46967	NaN	1
	661	Tb927.10.14010	Tb927.10.14010	rp2	hypothetical protein, conserved	50.631	45.1	0	55.119	1				-0.240427	0.0910913	1.04052		45.1	15	15	0.842105	-0.247928	15.454	26	33.9	13	13	0.772917	-0.371615	22.75	19	36.9	12	12	0.93191	-0.101737	27.642	22
	1226	Tb927.11.10670	Tb927.11.10670		glycosyl hydrolase, putative	133.9	1.2	0	5.032	1				0.833777	0.0912135	1.03994		1.2	1	1	2.44583	1.29032	40.87	2	1.2	1	1	1.27766	0.353506	39.699	2	1.2	1	1	1.8119	0.857503	NaN	1
	4057	Tb927.9.8130;Tb927.9.8100	Tb927.9.8130;Tb927.9.8100		nascent polypeptide associated complex subunit, putative;nascent polypeptide associated complex subunit, putative	20.129	87.2	0	146.73	2				0.267084	0.0912902	1.03958		87.2	11	11	1.20994	0.274931	28.17	36	87.2	10	10	1.08151	0.113052	7.1493	39	86.7	9	9	1.3317	0.413269	14.919	31
	200	Tb927.7.4910;Tb11.v5.0172	Tb927.7.4910;Tb11.v5.0172		hypothetical protein, conserved;hypothetical protein, conserved	40.483	28.7	0	39.504	2				-0.190873	0.0914532	1.0388		26.8	9	9	0.898796	-0.153935	8.4762	21	24.7	8	8	0.805542	-0.311968	8.9624	19	25.7	9	9	0.9287	-0.106716	9.9188	15
	1646	Tb927.11.2940	Tb927.11.2940		hypothetical protein, conserved	41.286	8.8	0	12.274	1				0.402186	0.0915938	1.03813		8.8	4	4	1.57861	0.658652	25.934	6	5.9	3	3	1.17163	0.22852	2.0586	4	2.7	1	1	1.2478	0.319387	3.1957	2
[truncated: 2,365 more rows]
